# Supplementary material
Source: PubMed Central journal article supplement (PMC3911772)

# Supplementary Figure 1

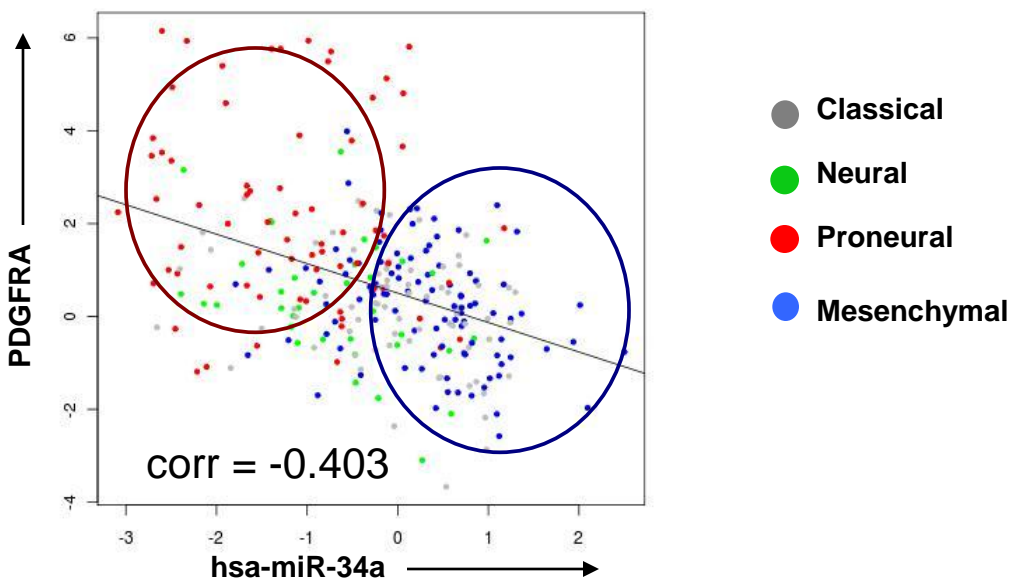

# Supplementary Figure 2

**A**

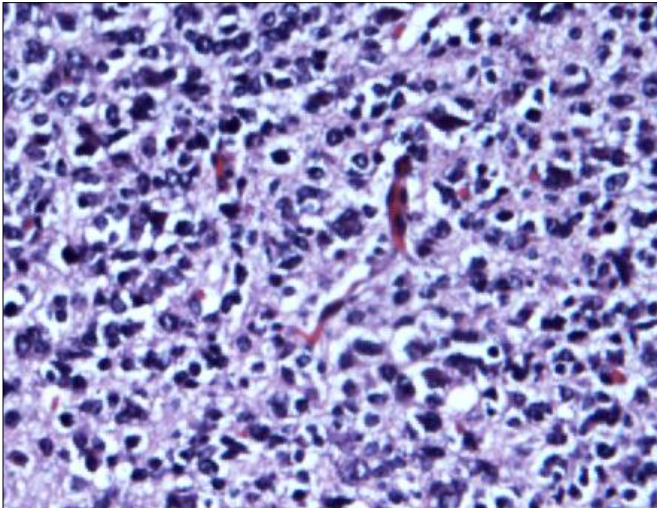

**B**

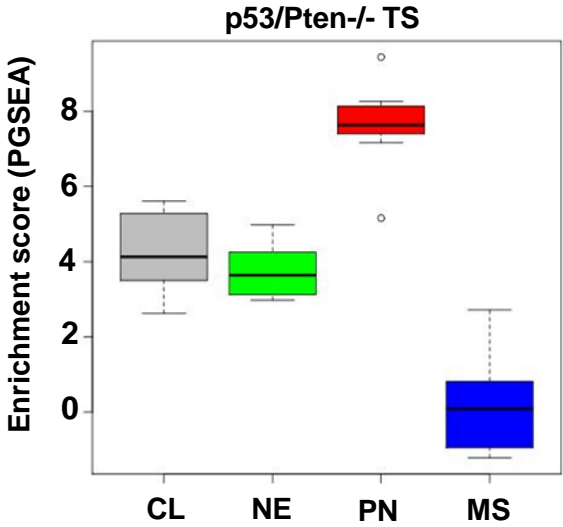

# Supplementary Figure 3

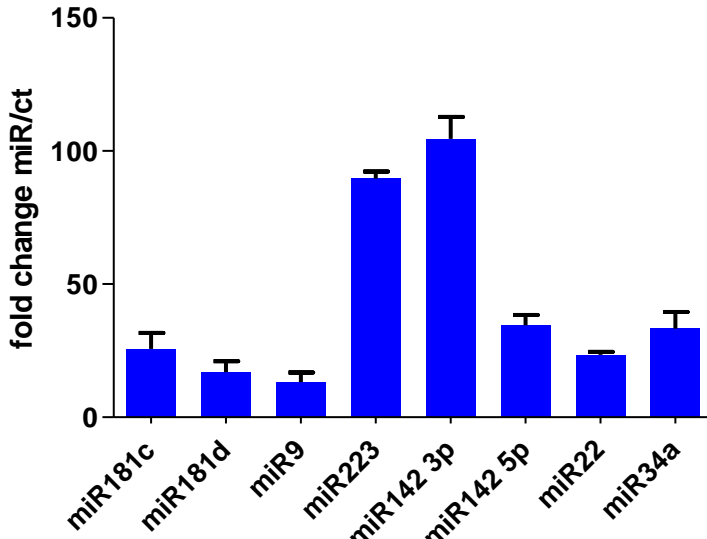

# Supplementary Figure 4

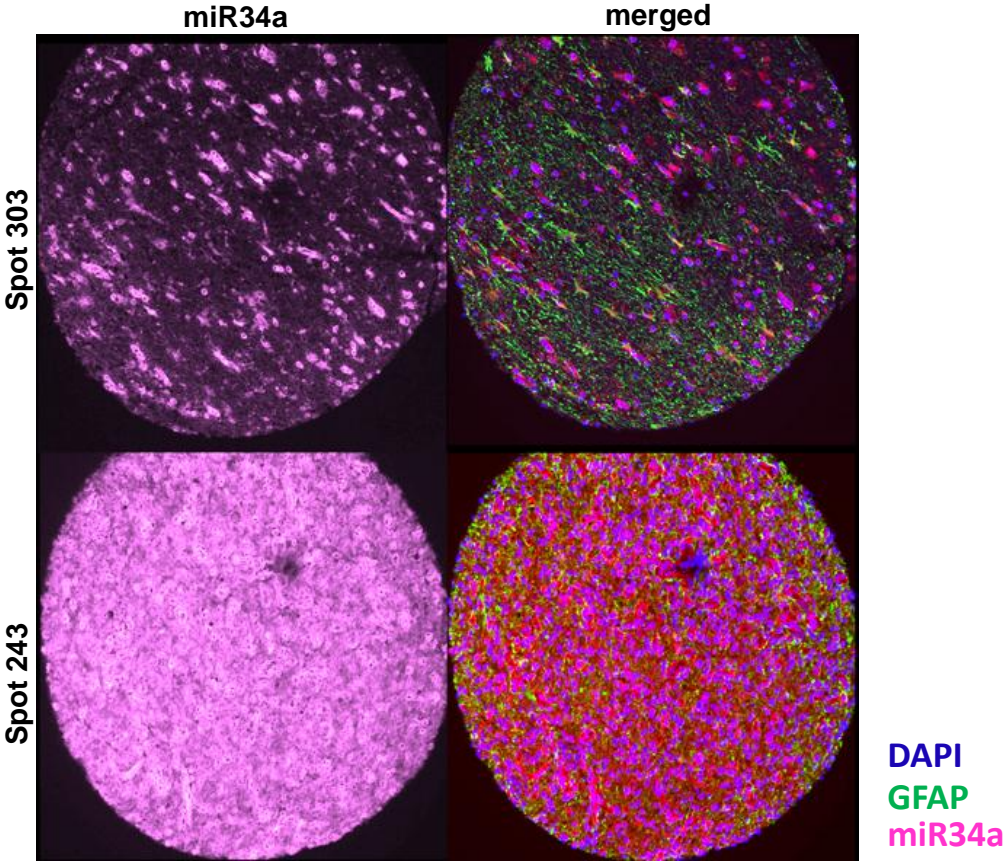

# Supplementary Figure 5

**A**

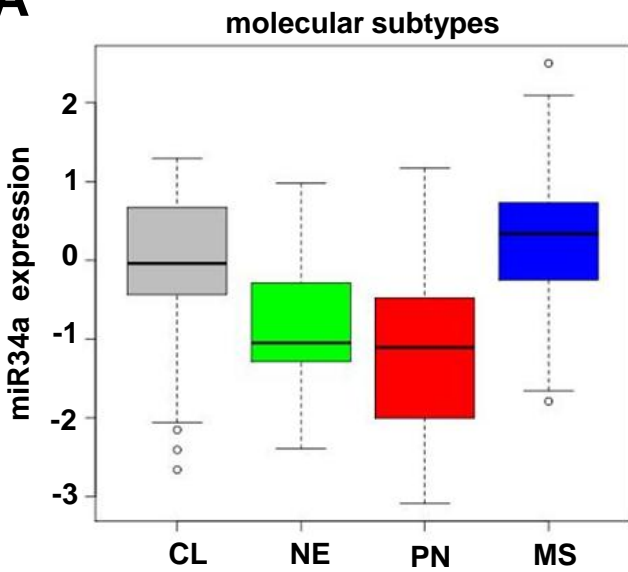

**B**

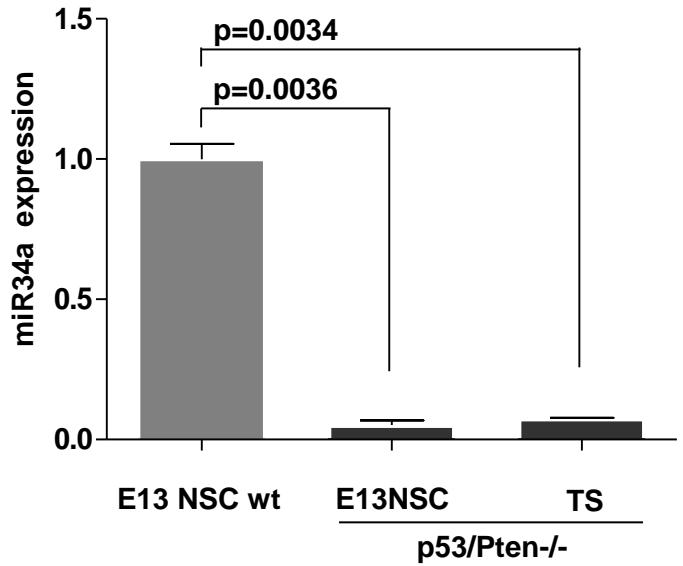

**C**

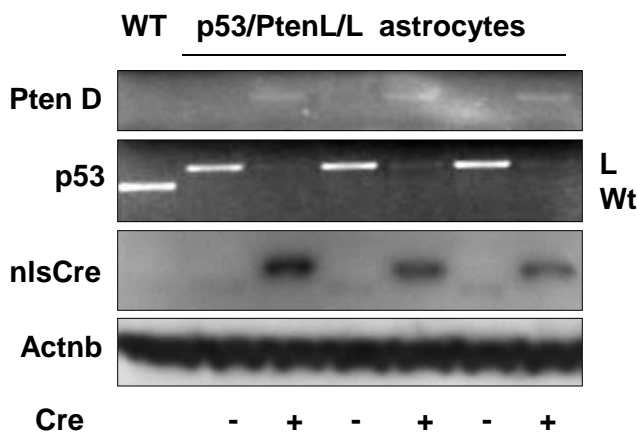

**D**

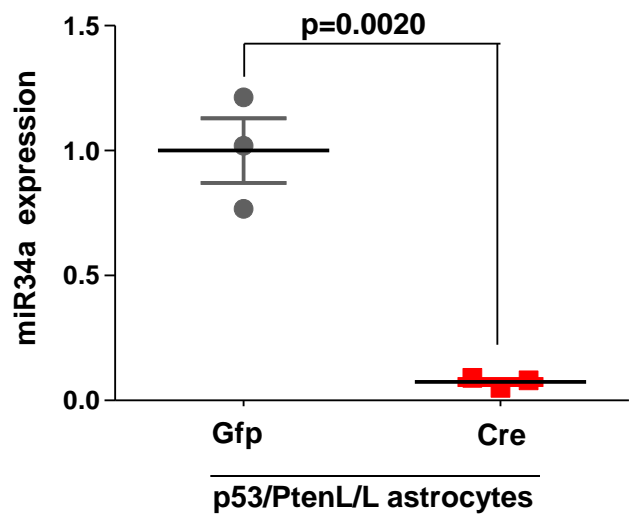

# Supplementary Figure 6

## A

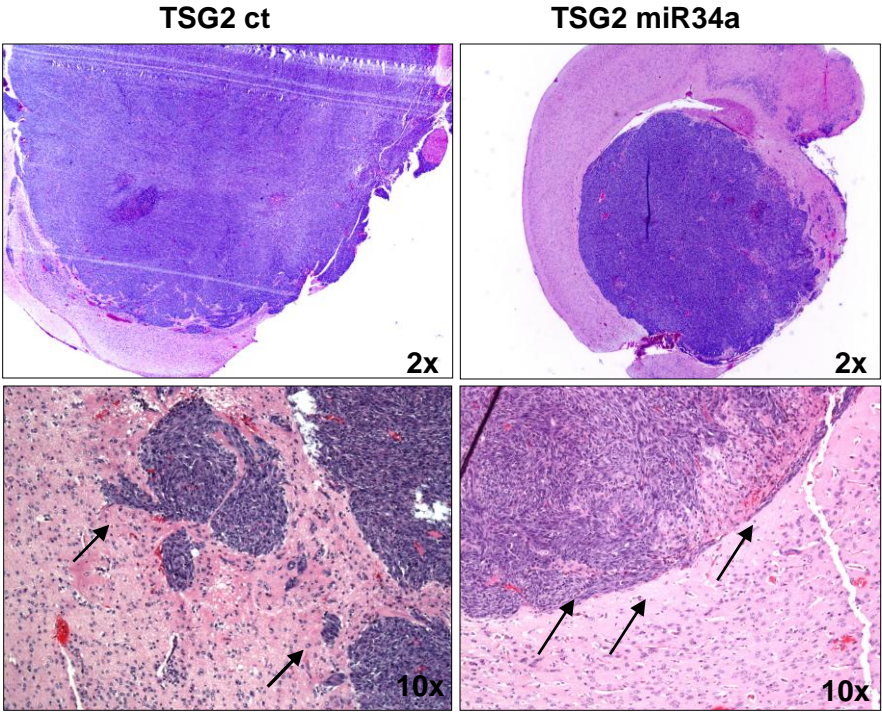

## B

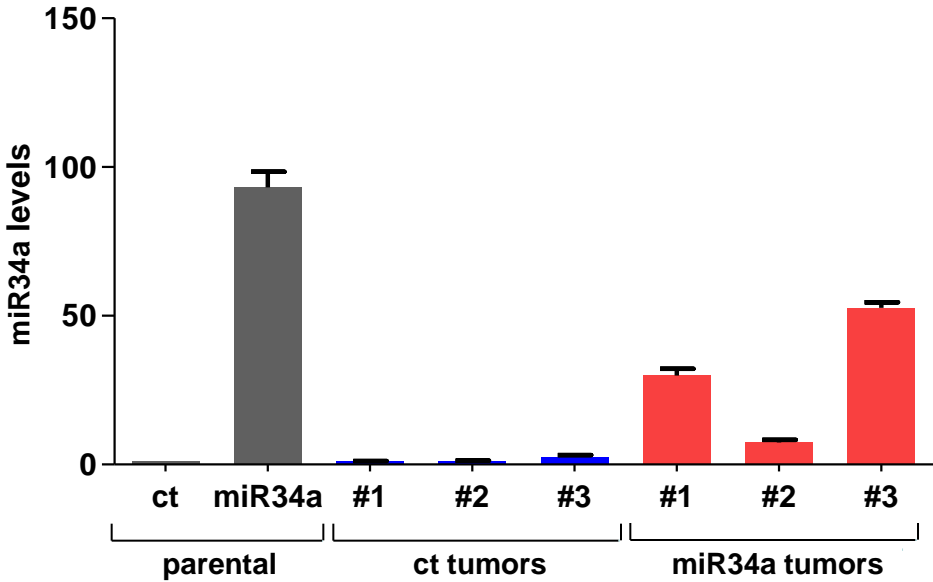

# Supplementary Figure 7

**A**

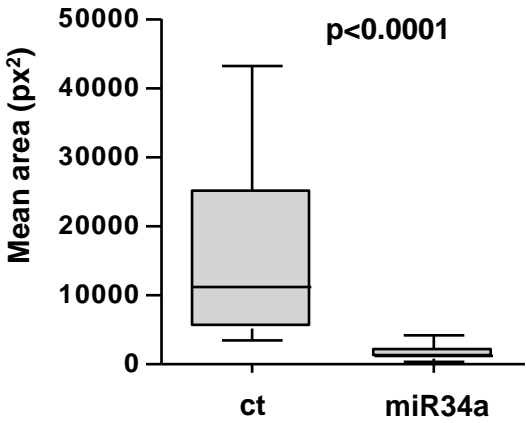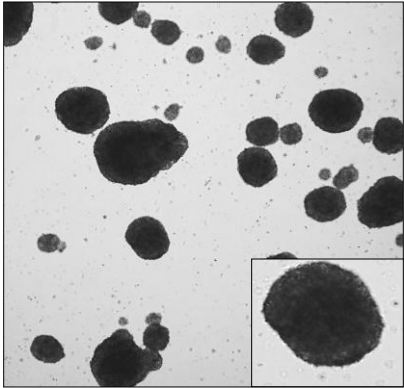

TS 543 ct

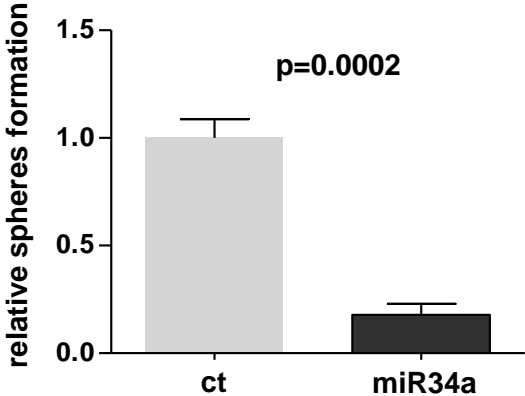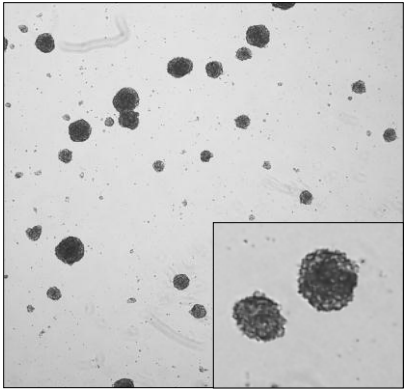

TS 543 miR34a

**B**

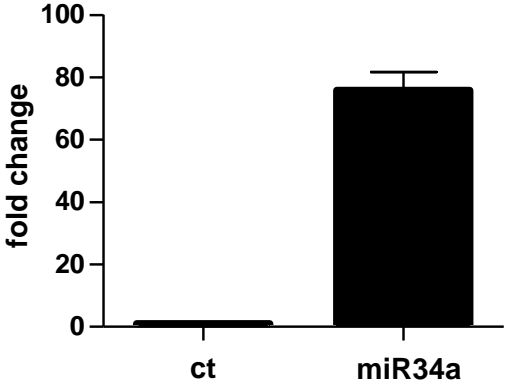

# Supplementary Figure 8

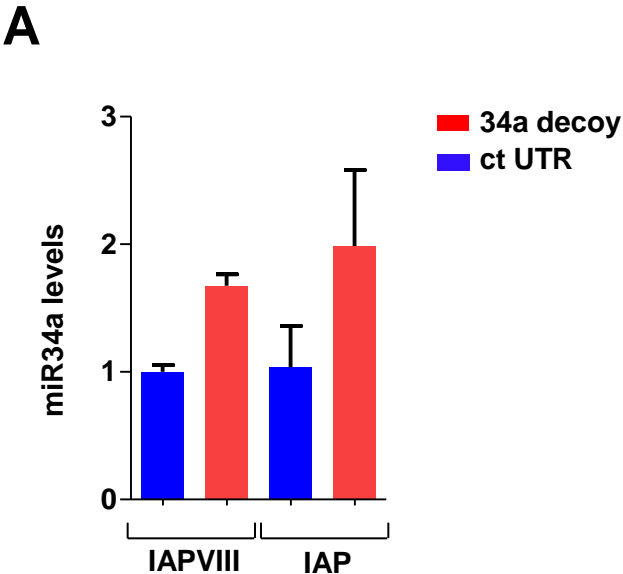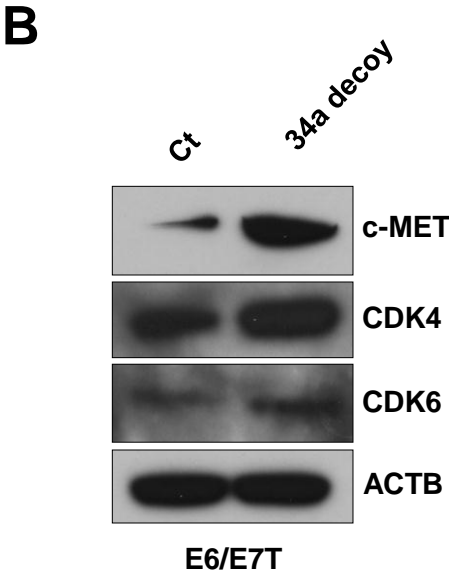



# Supplementary Figure 9

## A

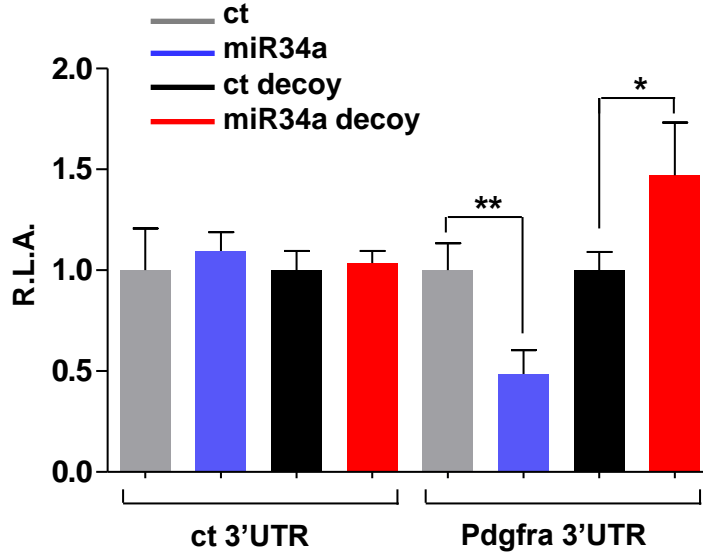

## B

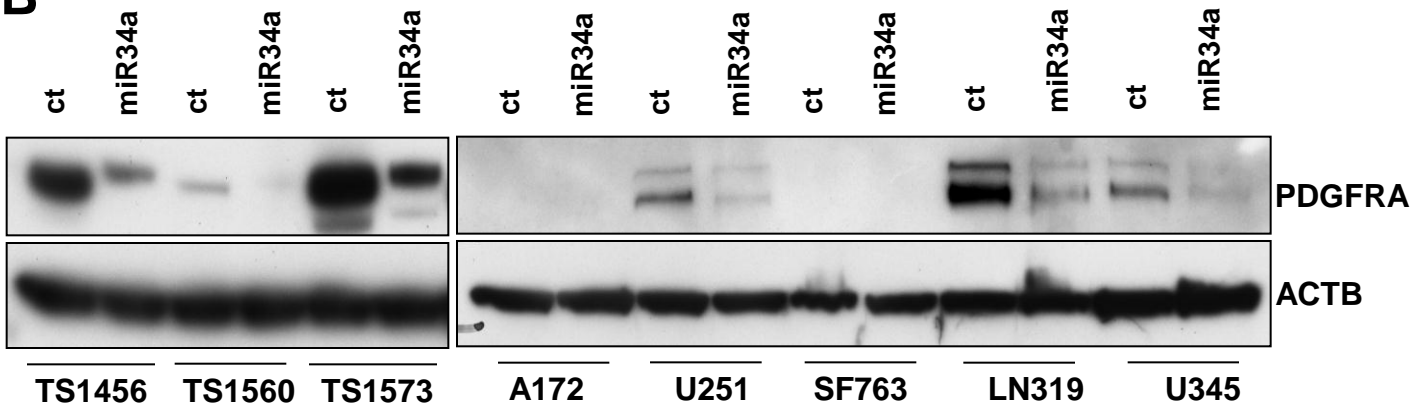

# Supplementary Figure 10

## A

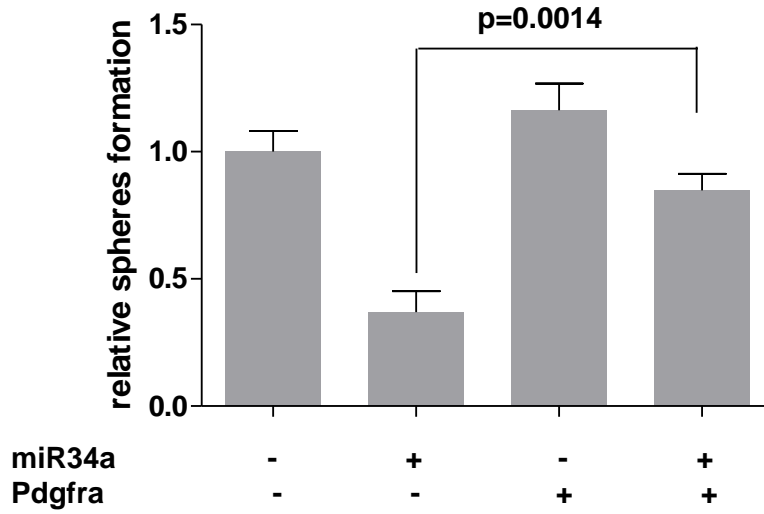

## B

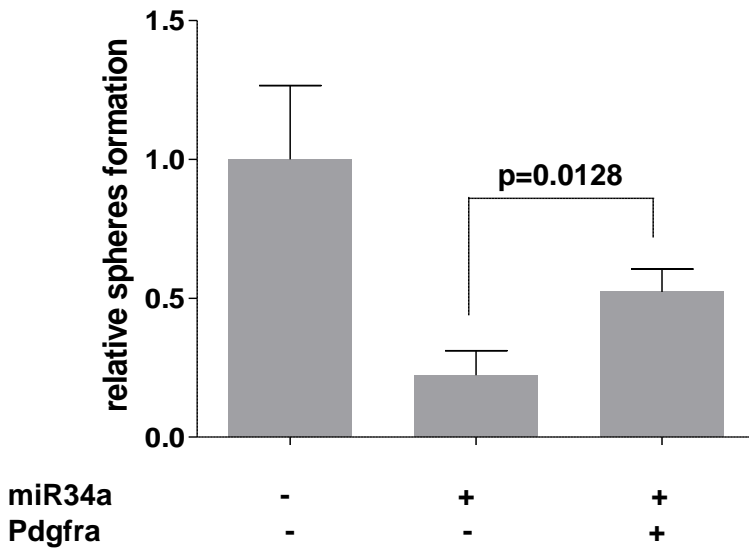

## C

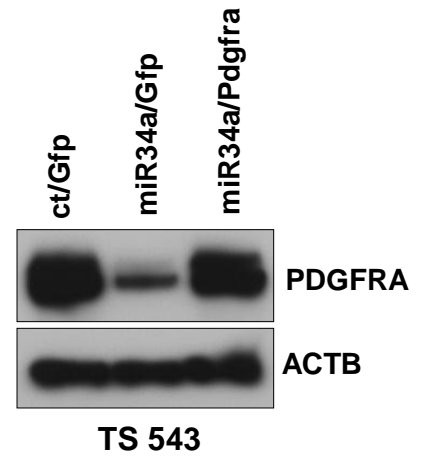

# Supplementary Figure 11

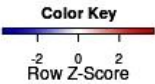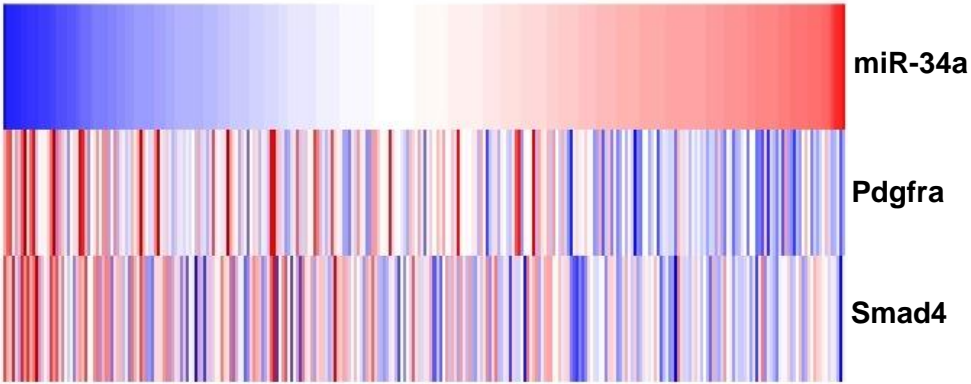

miR-34a: Pdgfra  $p= 9.324e-13$   
miR-34a: Smad4  $p= 1.068e-07$

# Supplementary Figure 12

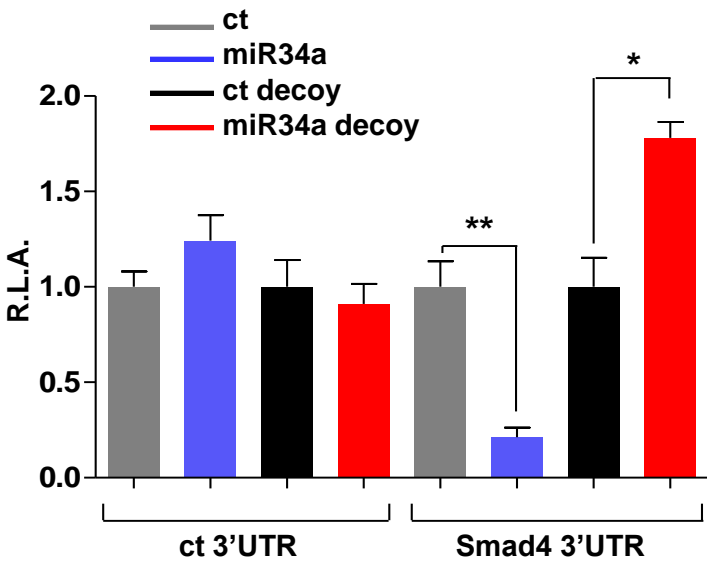

# Supplementary Figure 13

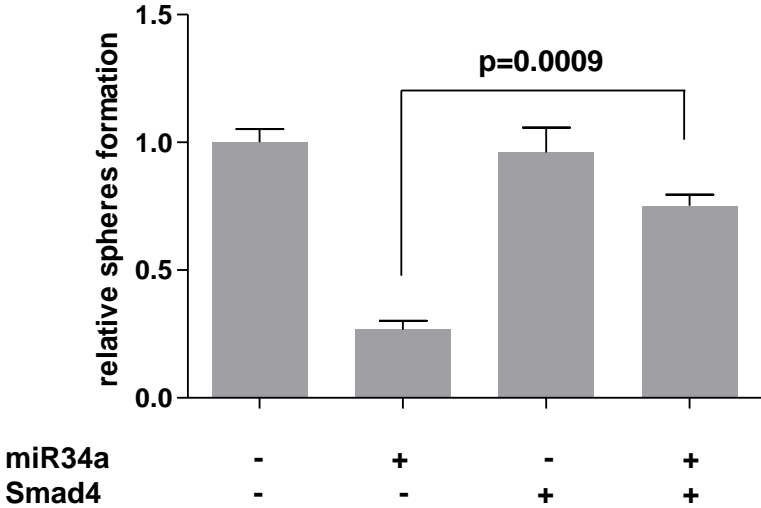

Supplement: NIHMS519232-supplement-2.pdf [file NIHMS519232-supplement-2.pdf]
