# Supplementary material
Source: PubMed Central journal article supplement (PMC3911772)
Supplement: NIHMS519232-supplement-3.pdf [file NIHMS519232-supplement-3.pdf]

### Supplementary Table 1. TCGA Sample Identifiers Used in the Analysis

|                     |
|---------------------|
| TCGA.02.0001.01C.01 |
| TCGA.02.0003.01A.01 |
| TCGA.02.0004.01A.01 |
| TCGA.02.0006.01B.01 |
| TCGA.02.0007.01A.01 |
| TCGA.02.0009.01A.01 |
| TCGA.02.0010.01A.01 |
| TCGA.02.0011.01B.01 |
| TCGA.02.0014.01A.01 |
| TCGA.02.0015.01A.01 |
| TCGA.02.0016.01A.01 |
| TCGA.02.0021.01A.01 |
| TCGA.02.0023.01B.01 |
| TCGA.02.0024.01B.01 |
| TCGA.02.0025.01A.01 |
| TCGA.02.0026.01B.01 |
| TCGA.02.0027.01A.01 |
| TCGA.02.0028.01A.01 |
| TCGA.02.0033.01A.01 |
| TCGA.02.0034.01A.01 |
| TCGA.02.0037.01A.01 |
| TCGA.02.0038.01A.01 |
| TCGA.02.0039.01A.01 |
| TCGA.02.0043.01A.01 |
| TCGA.02.0047.01A.01 |
| TCGA.02.0048.01A.01 |
| TCGA.02.0052.01A.01 |
| TCGA.02.0054.01A.01 |
| TCGA.02.0055.01A.01 |
| TCGA.02.0057.01A.01 |
| TCGA.02.0058.01A.01 |
| TCGA.02.0060.01A.01 |
| TCGA.02.0064.01A.01 |
| TCGA.02.0068.01A.01 |
| TCGA.02.0069.01A.01 |
| TCGA.02.0070.01A.01 |
| TCGA.02.0071.01A.01 |
| TCGA.02.0074.01A.01 |
| TCGA.02.0075.01A.01 |
| TCGA.02.0080.01A.01 |
| TCGA.02.0083.01A.01 |
| TCGA.02.0085.01A.01 |
| TCGA.02.0086.01A.01 |
| TCGA.02.0087.01A.01 |
| TCGA.02.0089.01A.01 |
| TCGA.02.0099.01A.01 |
| TCGA.02.0102.01A.01 |

|                     |
|---------------------|
| TCGA.02.0104.01A.01 |
| TCGA.02.0106.01A.01 |
| TCGA.02.0107.01A.01 |
| TCGA.02.0111.01A.01 |
| TCGA.02.0113.01A.01 |
| TCGA.02.0114.01A.01 |
| TCGA.02.0115.01A.01 |
| TCGA.02.0116.01A.01 |
| TCGA.02.0258.01A.01 |
| TCGA.02.0260.01A.03 |
| TCGA.02.0266.01A.01 |
| TCGA.02.0269.01B.01 |
| TCGA.02.0271.01A.01 |
| TCGA.02.0281.01A.01 |
| TCGA.02.0285.01A.01 |
| TCGA.02.0289.01A.01 |
| TCGA.02.0290.01A.01 |
| TCGA.02.0317.01A.01 |
| TCGA.02.0321.01A.01 |
| TCGA.02.0324.01A.01 |
| TCGA.02.0325.01A.01 |
| TCGA.02.0326.01A.01 |
| TCGA.02.0330.01A.01 |
| TCGA.02.0332.01A.01 |
| TCGA.02.0333.01A.02 |
| TCGA.02.0337.01A.01 |
| TCGA.02.0338.01A.01 |
| TCGA.02.0339.01A.01 |
| TCGA.02.0422.01A.01 |
| TCGA.02.0430.01A.01 |
| TCGA.02.0432.01A.02 |
| TCGA.02.0439.01A.01 |
| TCGA.02.0440.01A.01 |
| TCGA.02.0446.01A.01 |
| TCGA.02.0451.01A.01 |
| TCGA.02.0456.01A.01 |
| TCGA.06.0122.01A.01 |
| TCGA.06.0124.01A.01 |
| TCGA.06.0125.01A.01 |
| TCGA.06.0126.01A.01 |
| TCGA.06.0127.01A.01 |
| TCGA.06.0128.01A.01 |
| TCGA.06.0129.01A.01 |
| TCGA.06.0130.01A.01 |
| TCGA.06.0132.01A.02 |
| TCGA.06.0133.01A.02 |
| TCGA.06.0137.01A.03 |
| TCGA.06.0138.01A.02 |
| TCGA.06.0139.01A.01 |

|                     |
|---------------------|
| TCGA.06.0141.01A.01 |
| TCGA.06.0143.01A.01 |
| TCGA.06.0145.01A.04 |
| TCGA.06.0146.01A.01 |
| TCGA.06.0147.01A.01 |
| TCGA.06.0149.01A.05 |
| TCGA.06.0152.01A.02 |
| TCGA.06.0156.01A.01 |
| TCGA.06.0157.01A.01 |
| TCGA.06.0158.01A.01 |
| TCGA.06.0162.01A.01 |
| TCGA.06.0164.01A.01 |
| TCGA.06.0166.01A.01 |
| TCGA.06.0168.01A.01 |
| TCGA.06.0169.01A.01 |
| TCGA.06.0173.01A.01 |
| TCGA.06.0174.01A.01 |
| TCGA.06.0175.01A.01 |
| TCGA.06.0177.01A.01 |
| TCGA.06.0178.01A.01 |
| TCGA.06.0182.01A.01 |
| TCGA.06.0184.01A.01 |
| TCGA.06.0185.01A.01 |
| TCGA.06.0187.01A.01 |
| TCGA.06.0188.01A.01 |
| TCGA.06.0190.01A.01 |
| TCGA.06.0194.01A.01 |
| TCGA.06.0195.01B.01 |
| TCGA.06.0197.01A.02 |
| TCGA.06.0208.01B.01 |
| TCGA.06.0210.01A.01 |
| TCGA.06.0211.01B.01 |
| TCGA.06.0213.01A.01 |
| TCGA.06.0214.01A.02 |
| TCGA.06.0219.01A.01 |
| TCGA.06.0221.01A.01 |
| TCGA.06.0237.01A.02 |
| TCGA.06.0238.01A.02 |
| TCGA.06.0241.01A.02 |
| TCGA.06.0394.01A.01 |
| TCGA.06.0397.01A.01 |
| TCGA.06.0402.01A.01 |
| TCGA.06.0409.01A.02 |
| TCGA.06.0410.01A.01 |
| TCGA.06.0412.01A.01 |
| TCGA.06.0413.01A.01 |
| TCGA.06.0414.01A.01 |
| TCGA.06.0644.01A.02 |
| TCGA.06.0645.01A.01 |

|                     |
|---------------------|
| TCGA.06.0646.01A.01 |
| TCGA.06.0648.01A.01 |
| TCGA.08.0244.01A.01 |
| TCGA.08.0246.01A.01 |
| TCGA.08.0344.01A.01 |
| TCGA.08.0345.01A.01 |
| TCGA.08.0346.01A.01 |
| TCGA.08.0347.01A.01 |
| TCGA.08.0348.01A.01 |
| TCGA.08.0349.01A.01 |
| TCGA.08.0350.01A.01 |
| TCGA.08.0351.01A.01 |
| TCGA.08.0352.01A.01 |
| TCGA.08.0353.01A.01 |
| TCGA.08.0354.01A.01 |
| TCGA.08.0355.01A.01 |
| TCGA.08.0356.01A.01 |
| TCGA.08.0357.01A.01 |
| TCGA.08.0358.01A.01 |
| TCGA.08.0359.01A.01 |
| TCGA.08.0360.01A.01 |
| TCGA.08.0373.01A.01 |
| TCGA.08.0375.01A.01 |
| TCGA.08.0380.01A.01 |
| TCGA.08.0385.01A.01 |
| TCGA.08.0386.01A.01 |
| TCGA.08.0389.01A.01 |
| TCGA.08.0390.01A.01 |
| TCGA.08.0392.01A.01 |
| TCGA.08.0509.01A.01 |
| TCGA.08.0510.01A.01 |
| TCGA.08.0511.01A.01 |
| TCGA.08.0512.01A.01 |
| TCGA.08.0514.01A.01 |
| TCGA.08.0516.01A.01 |
| TCGA.08.0517.01A.01 |
| TCGA.08.0518.01A.01 |
| TCGA.08.0520.01A.01 |
| TCGA.08.0521.01A.01 |
| TCGA.08.0522.01A.01 |
| TCGA.08.0524.01A.01 |
| TCGA.08.0525.01A.01 |
| TCGA.08.0529.01A.02 |
| TCGA.08.0531.01A.01 |
| TCGA.12.0615.01A.01 |
| TCGA.12.0616.01A.01 |
| TCGA.12.0618.01A.01 |
| TCGA.12.0619.01A.01 |
| TCGA.12.0620.01A.01 |

|                     |
|---------------------|
| TCGA.02.0002.01A.01 |
| TCGA.02.0051.01A.01 |
| TCGA.02.0059.01A.01 |
| TCGA.06.0140.01A.01 |
| TCGA.06.0142.01A.01 |
| TCGA.06.0150.01A.01 |
| TCGA.06.0151.01A.01 |
| TCGA.06.0159.01A.01 |
| TCGA.06.0160.01A.01 |
| TCGA.06.0176.01A.02 |
| TCGA.06.0192.01B.01 |
| TCGA.06.0216.01B.01 |
| TCGA.06.0240.01A.02 |
| TCGA.06.0649.01B.01 |
| TCGA.06.0673.11A.01 |
| TCGA.06.0675.11A.01 |
| TCGA.06.0676.11A.02 |
| TCGA.06.0678.11A.01 |
| TCGA.06.0680.11A.01 |
| TCGA.06.0681.11A.01 |
| TCGA.06.0686.01A.01 |
| TCGA.06.0743.01A.01 |
| TCGA.06.0744.01A.01 |
| TCGA.06.0745.01A.01 |
| TCGA.06.0747.01A.01 |
| TCGA.06.0749.01A.01 |
| TCGA.06.0750.01A.01 |
| TCGA.08.0245.01A.01 |
| TCGA.08.0623.11A.01 |
| TCGA.08.0625.11A.01 |
| TCGA.08.0626.11A.01 |
| TCGA.08.0627.11A.01 |
| TCGA.12.0653.01A.01 |
| TCGA.12.0654.01B.01 |
| TCGA.12.0657.01A.01 |
| TCGA.12.0662.01A.01 |
| TCGA.12.0688.01A.02 |
| TCGA.12.0691.01A.01 |
| TCGA.12.0692.01A.01 |
| TCGA.12.0703.01A.02 |
| TCGA.12.0707.01A.01 |
| TCGA.12.0769.01A.01 |
| TCGA.12.0772.01A.01 |
| TCGA.12.0773.01A.01 |
| TCGA.12.0775.01A.01 |
| TCGA.12.0776.01A.01 |
| TCGA.12.0778.01A.01 |
| TCGA.12.0780.01A.01 |
| TCGA.15.0742.01A.01 |

|                     |
|---------------------|
| TCGA.06.0155.01B.01 |
| TCGA.06.1084.01A.01 |
| TCGA.06.1086.01A.02 |
| TCGA.06.1087.01A.02 |
| TCGA.12.1088.01A.01 |
| TCGA.12.1089.01A.01 |
| TCGA.12.1090.01A.01 |
| TCGA.12.1091.01A.01 |
| TCGA.12.1092.01B.01 |
| TCGA.12.1093.01A.01 |
| TCGA.12.1094.01A.01 |
| TCGA.12.1095.01A.01 |
| TCGA.12.1096.01A.01 |
| TCGA.12.1097.01B.01 |
| TCGA.12.1098.01C.01 |
| TCGA.12.1099.01A.01 |
| TCGA.14.0736.01A.01 |
| TCGA.14.0783.01B.01 |
| TCGA.14.0786.01B.01 |
| TCGA.14.1034.01A.01 |
| TCGA.14.1396.01A.01 |
| TCGA.14.1401.01A.01 |
| TCGA.14.1402.01A.01 |
| TCGA.14.1451.01A.01 |
| TCGA.14.1452.01A.01 |
| TCGA.14.1453.01A.01 |
| TCGA.14.1454.01A.01 |
| TCGA.14.1459.01A.01 |
| TCGA.15.1446.01A.01 |
| TCGA.15.1447.01A.01 |
| TCGA.15.1449.01A.01 |
| TCGA.16.1045.01B.01 |
| TCGA.16.1047.01B.01 |
| TCGA.16.1055.01B.01 |
| TCGA.16.1056.01B.01 |
| TCGA.16.1060.01A.01 |
| TCGA.16.1062.01A.01 |
| TCGA.16.1063.01B.01 |
| TCGA.19.0955.01A.02 |
| TCGA.19.0960.01A.02 |
| TCGA.19.0962.01B.01 |
| TCGA.19.0963.01B.01 |
| TCGA.19.0964.01A.01 |
| TCGA.19.1392.01A.01 |
| TCGA.26.1438.01A.01 |
| TCGA.26.1440.01A.01 |
| TCGA.26.1443.01A.01 |

**Supplementary Table 2. All CLR edges**

| <b>miR</b> | <b>gene</b> | <b>corr</b> |
|------------|-------------|-------------|
| hsa-let-7a | CCL13       | -0.27       |
| hsa-let-7a | CXCL5       | -0.29       |
| hsa-let-7b | C9orf24     | -0.23       |
| hsa-let-7b | FABP7       | 0.04        |
| hsa-let-7b | GAS1        | 0.26        |
| hsa-let-7b | IFIT2       | -0.08       |
| hsa-let-7b | LY86        | -0.14       |
| hsa-let-7b | SH3GL3      | -0.09       |
| hsa-let-7b | SOSTDC1     | -0.06       |
| hsa-let-7c | APCDD1      | 0.31        |
| hsa-let-7c | AQP1        | 0.31        |
| hsa-let-7c | C10orf65    | 0.34        |
| hsa-let-7c | C1QTNF5     | 0.38        |
| hsa-let-7c | C20orf96    | 0.28        |
| hsa-let-7c | C22orf23    | 0.35        |
| hsa-let-7c | CCDC136     | 0.34        |
| hsa-let-7c | CCDC41      | 0.33        |
| hsa-let-7c | CDO1        | 0.32        |
| hsa-let-7c | DCDC5       | 0.41        |
| hsa-let-7c | DLEC1       | 0.38        |
| hsa-let-7c | EGFR        | 0.26        |
| hsa-let-7c | FZD5        | -0.24       |
| hsa-let-7c | GRAMD3      | 0.35        |
| hsa-let-7c | GSTM2       | 0.27        |
| hsa-let-7c | HMGA2       | -0.32       |
| hsa-let-7c | HSPB8       | 0.35        |
| hsa-let-7c | ID4         | 0.39        |
| hsa-let-7c | INPP5F      | -0.34       |
| hsa-let-7c | MET         | -0.35       |
| hsa-let-7c | MGC13057    | 0.34        |
| hsa-let-7c | MSTN        | 0.39        |
| hsa-let-7c | MYH7        | 0.37        |
| hsa-let-7c | NFIA        | 0.42        |
| hsa-let-7c | NOX3        | 0.35        |
| hsa-let-7c | NT5E        | -0.38       |
| hsa-let-7c | OLFM4       | 0.34        |
| hsa-let-7c | OSGIN2      | 0.26        |
| hsa-let-7c | PAX6        | 0.36        |
| hsa-let-7c | PI16        | 0.38        |
| hsa-let-7c | POPDC3      | -0.35       |
| hsa-let-7c | PSD2        | 0.35        |
| hsa-let-7c | RASA4       | 0.38        |
| hsa-let-7c | RASL12      | 0.32        |
| hsa-let-7c | RAVER2      | 0.41        |
| hsa-let-7c | RGS17       | -0.31       |
| hsa-let-7c | RNF128      | -0.33       |
| hsa-let-7c | SLC14A1     | 0.28        |
| hsa-let-7c | SNCAIP      | 0.46        |
| hsa-let-7c | TGFA        | -0.38       |
| hsa-let-7c | TMIE        | 0.31        |

|            |           |       |
|------------|-----------|-------|
| hsa-let-7c | TOB2      | 0.3   |
| hsa-let-7c | TRIM2     | 0.23  |
| hsa-let-7c | ZNF420    | 0.15  |
| hsa-let-7d | CCL13     | -0.28 |
| hsa-let-7d | CXCL9     | -0.15 |
| hsa-let-7d | FUS       | 0.3   |
| hsa-let-7d | PLP1      | 0.06  |
| hsa-let-7d | RNF25     | 0.25  |
| hsa-let-7d | SLAMF8    | -0.31 |
| hsa-let-7d | SMARCD2   | 0.12  |
| hsa-let-7d | SPINK5    | 0.15  |
| hsa-let-7e | ALDH7A1   | 0.2   |
| hsa-let-7e | C1QL1     | -0.15 |
| hsa-let-7e | C3orf41   | -0.11 |
| hsa-let-7e | GJA1      | 0.25  |
| hsa-let-7e | HIST1H2BL | -0.23 |
| hsa-let-7e | HKR1      | 0.22  |
| hsa-let-7e | LOC147650 | 0.32  |
| hsa-let-7e | MLC1      | 0.28  |
| hsa-let-7e | NPDC1     | 0.27  |
| hsa-let-7e | NPNT      | 0.23  |
| hsa-let-7e | OIT3      | -0.02 |
| hsa-let-7e | RGAG4     | 0.26  |
| hsa-let-7e | SHROOM1   | 0.12  |
| hsa-let-7e | SYCP2L    | 0.06  |
| hsa-let-7e | TLR8      | -0.19 |
| hsa-let-7e | TOB2      | 0.23  |
| hsa-let-7e | ZHX1      | 0.31  |
| hsa-let-7f | DOK6      | 0.02  |
| hsa-let-7f | ENPP5     | -0.08 |
| hsa-let-7f | KIAA1276  | 0.26  |
| hsa-let-7f | LINGO2    | -0.05 |
| hsa-let-7f | SSTR1     | 0.02  |
| hsa-let-7g | HIST1H1C  | 0.05  |
| hsa-let-7g | HIST1H2BO | -0.1  |
| hsa-let-7g | PARP3     | 0.32  |
| hsa-let-7g | PDGFRA    | -0.01 |
| hsa-let-7g | SFRP2     | -0.18 |
| hsa-let-7g | SLC39A7   | 0.01  |
| hsa-let-7g | TMEM141   | -0.08 |
| hsa-let-7i | C6orf114  | -0.36 |
| hsa-let-7i | CCDC80    | 0.36  |
| hsa-let-7i | CDK4      | -0.02 |
| hsa-let-7i | DACT2     | -0.31 |
| hsa-let-7i | DBC1      | -0.35 |
| hsa-let-7i | DYNC111   | -0.35 |
| hsa-let-7i | EDIL3     | -0.4  |
| hsa-let-7i | EFCAB1    | -0.32 |
| hsa-let-7i | EGFR      | 0.3   |
| hsa-let-7i | ENPP4     | -0.34 |
| hsa-let-7i | EPB41L3   | -0.41 |
| hsa-let-7i | FBXL2     | -0.36 |
| hsa-let-7i | FGF13     | -0.29 |



|             |          |       |
|-------------|----------|-------|
| hsa-let-7i  | FLT3     | -0.35 |
| hsa-let-7i  | GAS1     | 0.39  |
| hsa-let-7i  | GDPD3    | 0.24  |
| hsa-let-7i  | GGTA1    | -0.24 |
| hsa-let-7i  | GUCY1B3  | -0.31 |
| hsa-let-7i  | HDGF2    | 0.35  |
| hsa-let-7i  | KCNK1    | -0.32 |
| hsa-let-7i  | KIAA1598 | -0.31 |
| hsa-let-7i  | KIF7     | 0.4   |
| hsa-let-7i  | LFNG     | 0.28  |
| hsa-let-7i  | MEOX2    | 0.29  |
| hsa-let-7i  | MYO5A    | -0.4  |
| hsa-let-7i  | NES      | 0.37  |
| hsa-let-7i  | NR4A2    | -0.33 |
| hsa-let-7i  | OXGR1    | -0.37 |
| hsa-let-7i  | PGRMC1   | -0.35 |
| hsa-let-7i  | PIGP     | -0.2  |
| hsa-let-7i  | QTRT1    | 0.4   |
| hsa-let-7i  | REPS2    | -0.45 |
| hsa-let-7i  | RGS4     | -0.38 |
| hsa-let-7i  | SMAP1L   | -0.41 |
| hsa-let-7i  | SNRP70   | 0.31  |
| hsa-let-7i  | SNTG2    | -0.27 |
| hsa-let-7i  | SPOCK1   | -0.31 |
| hsa-let-7i  | TIMM44   | 0.36  |
| hsa-let-7i  | TMEFF2   | -0.32 |
| hsa-let-7i  | TMEM16C  | -0.34 |
| hsa-let-7i  | TSPYL5   | -0.32 |
| hsa-let-7i  | USMG5    | -0.37 |
| hsa-mir-100 | ACPL2    | 0.17  |
| hsa-mir-100 | ALDH1A3  | -0.14 |
| hsa-mir-100 | ANKFN1   | 0.35  |
| hsa-mir-100 | ARSK     | 0.36  |
| hsa-mir-100 | ASCL1    | 0.13  |
| hsa-mir-100 | C10orf63 | 0.35  |
| hsa-mir-100 | C20orf26 | 0.28  |
| hsa-mir-100 | C22orf23 | 0.39  |
| hsa-mir-100 | C6orf105 | -0.32 |
| hsa-mir-100 | C9orf98  | 0.4   |
| hsa-mir-100 | CD55     | -0.3  |
| hsa-mir-100 | CHST9    | 0.26  |
| hsa-mir-100 | COL13A1  | -0.01 |
| hsa-mir-100 | CXCR7    | 0.06  |
| hsa-mir-100 | CYP3A5   | 0.23  |
| hsa-mir-100 | DDR1     | 0.26  |
| hsa-mir-100 | DDX43    | -0.1  |
| hsa-mir-100 | DNAH7    | 0.34  |
| hsa-mir-100 | ESX1     | -0.17 |
| hsa-mir-100 | FAM49B   | -0.37 |
| hsa-mir-100 | FLNB     | -0.13 |
| hsa-mir-100 | FMN2     | 0.1   |
| hsa-mir-100 | GJB1     | -0.39 |
| hsa-mir-100 | HEPACAM  | 0.31  |

|             |           |       |
|-------------|-----------|-------|
| hsa-mir-100 | IL17RD    | 0.31  |
| hsa-mir-100 | IQCK      | 0.32  |
| hsa-mir-100 | IQUB      | 0.38  |
| hsa-mir-100 | KATNAL2   | 0.21  |
| hsa-mir-100 | LOC402176 | -0.29 |
| hsa-mir-100 | LRP4      | 0.27  |
| hsa-mir-100 | MAGEA8    | -0.17 |
| hsa-mir-100 | MAGEC1    | -0.14 |
| hsa-mir-100 | MAGEC2    | -0.09 |
| hsa-mir-100 | MAL2      | -0.2  |
| hsa-mir-100 | MMD       | -0.41 |
| hsa-mir-100 | MSMB      | -0.17 |
| hsa-mir-100 | MUM1L1    | -0.23 |
| hsa-mir-100 | NFIA      | 0.14  |
| hsa-mir-100 | PABPC4    | -0.24 |
| hsa-mir-100 | PCDHB8    | 0.36  |
| hsa-mir-100 | PHEX      | 0.4   |
| hsa-mir-100 | PHLDA2    | -0.09 |
| hsa-mir-100 | PLA2G7    | -0.24 |
| hsa-mir-100 | PPM1F     | -0.34 |
| hsa-mir-100 | PPP1R14A  | -0.32 |
| hsa-mir-100 | RASL11A   | -0.3  |
| hsa-mir-100 | RFX2      | 0.41  |
| hsa-mir-100 | RIBC1     | 0.39  |
| hsa-mir-100 | S100A2    | 0.46  |
| hsa-mir-100 | SALL3     | 0.15  |
| hsa-mir-100 | SLC47A2   | 0.27  |
| hsa-mir-100 | SLITRK4   | -0.23 |
| hsa-mir-100 | SNCAIP    | 0.25  |
| hsa-mir-100 | SORBS1    | 0.21  |
| hsa-mir-100 | SPINK5    | -0.22 |
| hsa-mir-100 | SSTR1     | -0.31 |
| hsa-mir-100 | TM4SF1    | -0.13 |
| hsa-mir-100 | TSPY2     | -0.14 |
| hsa-mir-100 | UBQLNL    | 0.29  |
| hsa-mir-100 | ZBTB20    | 0.3   |
| hsa-mir-100 | ZNF214    | 0.22  |
| hsa-mir-101 | AIF1      | -0.22 |
| hsa-mir-101 | ANXA2     | -0.38 |
| hsa-mir-101 | C2orf59   | -0.42 |
| hsa-mir-101 | CD28      | -0.3  |
| hsa-mir-101 | GABRB1    | 0.22  |
| hsa-mir-101 | GNAZ      | 0.29  |
| hsa-mir-101 | IGFBP2    | -0.35 |
| hsa-mir-101 | IGFBP7    | -0.27 |
| hsa-mir-101 | IKIP      | -0.39 |
| hsa-mir-101 | IL17B     | -0.37 |
| hsa-mir-101 | INA       | 0.16  |
| hsa-mir-101 | JAKMIP1   | 0.24  |
| hsa-mir-101 | KCNB1     | 0.36  |
| hsa-mir-101 | KIAA0240  | 0.23  |
| hsa-mir-101 | LOC541471 | -0.39 |
| hsa-mir-101 | MPZL1     | -0.15 |

|             |              |       |
|-------------|--------------|-------|
| hsa-mir-101 | MS4A4A       | -0.3  |
| hsa-mir-101 | MXI1         | 0.38  |
| hsa-mir-101 | MXRA5        | -0.31 |
| hsa-mir-101 | PLAU         | -0.38 |
| hsa-mir-101 | PLAUR        | -0.38 |
| hsa-mir-101 | PRKX         | 0.18  |
| hsa-mir-101 | PTX3         | -0.38 |
| hsa-mir-101 | RAB27A       | -0.36 |
| hsa-mir-101 | RP11-217H1.1 | -0.26 |
| hsa-mir-101 | SERPINH1     | -0.38 |
| hsa-mir-101 | SLC38A6      | -0.33 |
| hsa-mir-101 | SNRPN        | 0.18  |
| hsa-mir-101 | TNFSF11      | -0.39 |
| hsa-mir-101 | UPF2         | 0.35  |
| hsa-mir-103 | March4       | 0.42  |
| hsa-mir-103 | A2BP1        | 0.34  |
| hsa-mir-103 | ACTA1        | 0.48  |
| hsa-mir-103 | ADCYAP1      | 0.34  |
| hsa-mir-103 | B4GALT6      | 0.35  |
| hsa-mir-103 | CAMKV        | 0.38  |
| hsa-mir-103 | CAP2         | 0.33  |
| hsa-mir-103 | DACH2        | 0.41  |
| hsa-mir-103 | DLGAP1       | 0.2   |
| hsa-mir-103 | FLJ20699     | -0.33 |
| hsa-mir-103 | GABRG2       | 0.35  |
| hsa-mir-103 | GPRASP2      | 0.35  |
| hsa-mir-103 | KCNA1        | 0.17  |
| hsa-mir-103 | NKIRAS1      | 0.39  |
| hsa-mir-103 | SAG          | 0.23  |
| hsa-mir-103 | TAC3         | 0.34  |
| hsa-mir-103 | TACSTD1      | 0.22  |
| hsa-mir-103 | VSNL1        | 0.26  |
| hsa-mir-105 | ACTBL1       | -0.17 |
| hsa-mir-105 | ACTR10       | -0.09 |
| hsa-mir-105 | ALX1         | -0.2  |
| hsa-mir-105 | ARHGEF18     | 0.16  |
| hsa-mir-105 | ASNA1        | -0.13 |
| hsa-mir-105 | BTBD12       | 0.12  |
| hsa-mir-105 | C12orf29     | -0.25 |
| hsa-mir-105 | C14orf104    | -0.11 |
| hsa-mir-105 | C14orf109    | -0.12 |
| hsa-mir-105 | C14orf129    | -0.17 |
| hsa-mir-105 | C14orf142    | -0.12 |
| hsa-mir-105 | C1orf211     | -0.2  |
| hsa-mir-105 | CAPZA2       | -0.02 |
| hsa-mir-105 | CCNC         | -0.15 |
| hsa-mir-105 | CEPT1        | -0.15 |
| hsa-mir-105 | CFL2         | -0.13 |
| hsa-mir-105 | CGRRF1       | -0.15 |
| hsa-mir-105 | CLEC16A      | 0.18  |
| hsa-mir-105 | CLEC2A       | -0.14 |
| hsa-mir-105 | CNIH         | -0.18 |
| hsa-mir-105 | DCK          | -0.17 |

|              |          |       |
|--------------|----------|-------|
| hsa-mir-105  | DKK4     | -0.14 |
| hsa-mir-105  | DNTT     | -0.2  |
| hsa-mir-105  | EVI2A    | -0.07 |
| hsa-mir-105  | F13B     | -0.19 |
| hsa-mir-105  | GBAS     | -0.04 |
| hsa-mir-105  | GPR139   | 0.07  |
| hsa-mir-105  | KLK12    | -0.21 |
| hsa-mir-105  | KRBA1    | 0.11  |
| hsa-mir-105  | LASP1    | 0.11  |
| hsa-mir-105  | LYRM1    | -0.13 |
| hsa-mir-105  | MAT2B    | -0.12 |
| hsa-mir-105  | NAV1     | 0.11  |
| hsa-mir-105  | NCOR2    | 0.18  |
| hsa-mir-105  | OSBPL5   | 0.07  |
| hsa-mir-105  | PAQR3    | -0.11 |
| hsa-mir-105  | PDCD10   | -0.14 |
| hsa-mir-105  | PEX3     | -0.13 |
| hsa-mir-105  | PIGH     | -0.13 |
| hsa-mir-105  | PLDN     | -0.06 |
| hsa-mir-105  | PRDM14   | -0.19 |
| hsa-mir-105  | PRSS7    | -0.2  |
| hsa-mir-105  | RAG2     | -0.18 |
| hsa-mir-105  | RPS3A    | -0.15 |
| hsa-mir-105  | SCRIB    | 0.18  |
| hsa-mir-105  | SELT     | -0.12 |
| hsa-mir-105  | SEMG1    | -0.19 |
| hsa-mir-105  | SNX3     | -0.09 |
| hsa-mir-105  | SPINK4   | -0.2  |
| hsa-mir-105  | STOML2   | -0.12 |
| hsa-mir-105  | STX7     | -0.14 |
| hsa-mir-105  | TAF15    | 0.15  |
| hsa-mir-105  | THOP1    | 0.12  |
| hsa-mir-105  | TMED2    | -0.13 |
| hsa-mir-105  | TMEM16H  | 0.21  |
| hsa-mir-105  | TMPRSS3  | -0.17 |
| hsa-mir-105  | TNRC15   | 0.17  |
| hsa-mir-105  | TRIM15   | -0.22 |
| hsa-mir-105  | WDR51B   | -0.14 |
| hsa-mir-105  | XYLT2    | 0.16  |
| hsa-mir-106a | March2   | -0.39 |
| hsa-mir-106a | AADAACL1 | -0.57 |
| hsa-mir-106a | ACOT4    | -0.44 |
| hsa-mir-106a | ACOT6    | -0.43 |
| hsa-mir-106a | ALDH1A1  | -0.37 |
| hsa-mir-106a | ALMS1    | 0.35  |
| hsa-mir-106a | AMPD3    | -0.41 |
| hsa-mir-106a | AOF2     | 0.52  |
| hsa-mir-106a | ARID2    | 0.39  |
| hsa-mir-106a | ASPM     | 0.57  |
| hsa-mir-106a | ATAD2    | 0.5   |
| hsa-mir-106a | ATAD5    | 0.58  |
| hsa-mir-106a | ATF7IP2  | -0.44 |
| hsa-mir-106a | B3GALT4  | -0.36 |

|              |             |       |
|--------------|-------------|-------|
| hsa-mir-106a | BCAR3       | -0.33 |
| hsa-mir-106a | BHLHB3      | -0.43 |
| hsa-mir-106a | BLVRB       | -0.49 |
| hsa-mir-106a | BUB1        | 0.5   |
| hsa-mir-106a | BUB1B       | 0.54  |
| hsa-mir-106a | C11orf82    | 0.54  |
| hsa-mir-106a | C13orf3     | 0.59  |
| hsa-mir-106a | C15orf42    | 0.57  |
| hsa-mir-106a | C16orf59    | 0.52  |
| hsa-mir-106a | C18orf54    | 0.59  |
| hsa-mir-106a | C19orf57    | 0.49  |
| hsa-mir-106a | C1orf106    | 0.51  |
| hsa-mir-106a | C4orf18     | -0.37 |
| hsa-mir-106a | C5orf32     | -0.48 |
| hsa-mir-106a | C6orf1      | -0.39 |
| hsa-mir-106a | C6orf167    | 0.51  |
| hsa-mir-106a | CASC5       | 0.49  |
| hsa-mir-106a | CCNA2       | 0.5   |
| hsa-mir-106a | CCNB2       | 0.54  |
| hsa-mir-106a | CDC2        | 0.5   |
| hsa-mir-106a | CDC20       | 0.48  |
| hsa-mir-106a | CDC25C      | 0.55  |
| hsa-mir-106a | CDC45L      | 0.57  |
| hsa-mir-106a | CDC6        | 0.54  |
| hsa-mir-106a | CDC7        | 0.42  |
| hsa-mir-106a | CDCA5       | 0.51  |
| hsa-mir-106a | CDCA8       | 0.53  |
| hsa-mir-106a | CDT1        | 0.47  |
| hsa-mir-106a | CENPE       | 0.51  |
| hsa-mir-106a | CENPF       | 0.55  |
| hsa-mir-106a | CENPH       | 0.56  |
| hsa-mir-106a | CENPJ       | 0.5   |
| hsa-mir-106a | CENPK       | 0.46  |
| hsa-mir-106a | CENPM       | 0.48  |
| hsa-mir-106a | CHAF1A      | 0.45  |
| hsa-mir-106a | CHCHD7      | -0.32 |
| hsa-mir-106a | CHD7        | 0.48  |
| hsa-mir-106a | CHEK1       | 0.45  |
| hsa-mir-106a | CHPT1       | -0.38 |
| hsa-mir-106a | CHTF18      | 0.46  |
| hsa-mir-106a | CKAP2       | 0.51  |
| hsa-mir-106a | CLU         | -0.42 |
| hsa-mir-106a | CSRP1       | -0.5  |
| hsa-mir-106a | CTSH        | -0.35 |
| hsa-mir-106a | CYB5R1      | -0.36 |
| hsa-mir-106a | DBF4        | 0.48  |
| hsa-mir-106a | DCC1        | 0.5   |
| hsa-mir-106a | DEPDC1B     | 0.58  |
| hsa-mir-106a | KFZp762E131 | 0.54  |
| hsa-mir-106a | DLG7        | 0.52  |
| hsa-mir-106a | DNA2L       | 0.46  |
| hsa-mir-106a | DNMT1       | 0.46  |
| hsa-mir-106a | DOK6        | 0.05  |

|              |          |       |
|--------------|----------|-------|
| hsa-mir-106a | DSEL     | 0.47  |
| hsa-mir-106a | DTL      | 0.57  |
| hsa-mir-106a | E2F2     | 0.52  |
| hsa-mir-106a | EAF2     | -0.41 |
| hsa-mir-106a | EMX1     | -0.34 |
| hsa-mir-106a | ENDOD1   | -0.45 |
| hsa-mir-106a | EPHX2    | -0.41 |
| hsa-mir-106a | ERCC6L   | 0.49  |
| hsa-mir-106a | ESCO2    | 0.55  |
| hsa-mir-106a | ETV1     | 0.41  |
| hsa-mir-106a | EXO1     | 0.56  |
| hsa-mir-106a | FAH      | -0.45 |
| hsa-mir-106a | FAM108C1 | -0.22 |
| hsa-mir-106a | FAM54A   | 0.49  |
| hsa-mir-106a | FAM60A   | 0.49  |
| hsa-mir-106a | FAM64A   | 0.57  |
| hsa-mir-106a | FAM79A   | -0.51 |
| hsa-mir-106a | FAM83D   | 0.47  |
| hsa-mir-106a | FANCC    | 0.56  |
| hsa-mir-106a | FANCD2   | 0.57  |
| hsa-mir-106a | FANCE    | 0.5   |
| hsa-mir-106a | FANCG    | 0.5   |
| hsa-mir-106a | FANCI    | 0.55  |
| hsa-mir-106a | FBXO5    | 0.54  |
| hsa-mir-106a | FBXO6    | -0.39 |
| hsa-mir-106a | FEN1     | 0.39  |
| hsa-mir-106a | FOXM1    | 0.49  |
| hsa-mir-106a | GBP2     | -0.17 |
| hsa-mir-106a | GINS2    | 0.5   |
| hsa-mir-106a | GJA1     | -0.33 |
| hsa-mir-106a | GNG4     | 0.47  |
| hsa-mir-106a | GPR37    | -0.34 |
| hsa-mir-106a | GSG2     | 0.5   |
| hsa-mir-106a | H3F3A    | 0.56  |
| hsa-mir-106a | HAND2    | 0.41  |
| hsa-mir-106a | HDAC2    | 0.49  |
| hsa-mir-106a | HELLS    | 0.46  |
| hsa-mir-106a | HIST1H3J | 0.55  |
| hsa-mir-106a | HLA-A    | -0.16 |
| hsa-mir-106a | HLA-E    | -0.21 |
| hsa-mir-106a | HMGB2    | 0.55  |
| hsa-mir-106a | HMGB3    | 0.47  |
| hsa-mir-106a | HOXD3    | 0.48  |
| hsa-mir-106a | HRASLS3  | -0.5  |
| hsa-mir-106a | HSD11B1  | -0.48 |
| hsa-mir-106a | HTRA1    | -0.39 |
| hsa-mir-106a | KIAA1553 | 0.51  |
| hsa-mir-106a | KIF11    | 0.5   |
| hsa-mir-106a | KIF14    | 0.52  |
| hsa-mir-106a | KIF15    | 0.6   |
| hsa-mir-106a | KIF18A   | 0.49  |
| hsa-mir-106a | KIF23    | 0.51  |
| hsa-mir-106a | KIF2C    | 0.57  |

|              |           |       |
|--------------|-----------|-------|
| hsa-mir-106a | KIF4A     | 0.51  |
| hsa-mir-106a | KIFC1     | 0.57  |
| hsa-mir-106a | KLHDC9    | -0.43 |
| hsa-mir-106a | KNTC1     | 0.48  |
| hsa-mir-106a | LGI1      | -0.37 |
| hsa-mir-106a | LMNB1     | 0.48  |
| hsa-mir-106a | LMNB2     | 0.48  |
| hsa-mir-106a | MAD2L1    | 0.52  |
| hsa-mir-106a | MARCKSL1  | 0.38  |
| hsa-mir-106a | MCM10     | 0.54  |
| hsa-mir-106a | MCM8      | 0.48  |
| hsa-mir-106a | MELK      | 0.49  |
| hsa-mir-106a | MEX3A     | 0.62  |
| hsa-mir-106a | MEX3B     | 0.46  |
| hsa-mir-106a | MKI67     | 0.5   |
| hsa-mir-106a | MKRN3     | 0.49  |
| hsa-mir-106a | MLF1IP    | 0.53  |
| hsa-mir-106a | MSH6      | 0.43  |
| hsa-mir-106a | MT1E      | -0.49 |
| hsa-mir-106a | MT1G      | -0.43 |
| hsa-mir-106a | MT1H      | -0.36 |
| hsa-mir-106a | MT1JP     | -0.47 |
| hsa-mir-106a | MT1M      | -0.48 |
| hsa-mir-106a | MT2A      | -0.4  |
| hsa-mir-106a | MXD3      | 0.5   |
| hsa-mir-106a | MYB       | 0.44  |
| hsa-mir-106a | MYBL2     | 0.52  |
| hsa-mir-106a | NDC80     | 0.55  |
| hsa-mir-106a | NEIL3     | 0.54  |
| hsa-mir-106a | NEK2      | 0.49  |
| hsa-mir-106a | NEUROD4   | 0.35  |
| hsa-mir-106a | NUF2      | 0.55  |
| hsa-mir-106a | NUSAP1    | 0.54  |
| hsa-mir-106a | NY-SAR-48 | 0.52  |
| hsa-mir-106a | ODC1      | 0.52  |
| hsa-mir-106a | OPLAH     | -0.4  |
| hsa-mir-106a | P2RY2     | -0.45 |
| hsa-mir-106a | PAFAH1B3  | 0.45  |
| hsa-mir-106a | PBK       | 0.5   |
| hsa-mir-106a | PLEKHK1   | 0.53  |
| hsa-mir-106a | PLK4      | 0.53  |
| hsa-mir-106a | PNPLA4    | -0.38 |
| hsa-mir-106a | POLG      | 0.58  |
| hsa-mir-106a | POLQ      | 0.5   |
| hsa-mir-106a | PPCS      | -0.47 |
| hsa-mir-106a | PRC1      | 0.53  |
| hsa-mir-106a | PRNP      | -0.56 |
| hsa-mir-106a | PTTG2     | 0.47  |
| hsa-mir-106a | RACGAP1   | 0.5   |
| hsa-mir-106a | RAD51     | 0.53  |
| hsa-mir-106a | RAD54L    | 0.55  |
| hsa-mir-106a | RBKS      | -0.44 |
| hsa-mir-106a | RFC3      | 0.55  |

|              |          |       |
|--------------|----------|-------|
| hsa-mir-106a | RFC5     | 0.46  |
| hsa-mir-106a | RILP     | -0.52 |
| hsa-mir-106a | RNASEH2A | 0.53  |
| hsa-mir-106a | RRM2     | 0.5   |
| hsa-mir-106a | SALL3    | 0.36  |
| hsa-mir-106a | SDS      | -0.37 |
| hsa-mir-106a | SERPINF1 | -0.44 |
| hsa-mir-106a | SGOL2    | 0.51  |
| hsa-mir-106a | SH3BP4   | 0.42  |
| hsa-mir-106a | SHD      | 0.43  |
| hsa-mir-106a | SIRPA    | -0.45 |
| hsa-mir-106a | SLC7A8   | -0.47 |
| hsa-mir-106a | SNTA1    | -0.43 |
| hsa-mir-106a | SOX11    | 0.49  |
| hsa-mir-106a | SOX4     | 0.57  |
| hsa-mir-106a | SPAG5    | 0.53  |
| hsa-mir-106a | SPC25    | 0.49  |
| hsa-mir-106a | SPOCK2   | -0.42 |
| hsa-mir-106a | SREBF1   | -0.45 |
| hsa-mir-106a | STOM     | -0.44 |
| hsa-mir-106a | SYTL2    | -0.45 |
| hsa-mir-106a | TACC1    | -0.48 |
| hsa-mir-106a | TCF3     | 0.52  |
| hsa-mir-106a | TIMELESS | 0.52  |
| hsa-mir-106a | TMSL8    | 0.43  |
| hsa-mir-106a | TNFSF12  | -0.51 |
| hsa-mir-106a | TOP2A    | 0.57  |
| hsa-mir-106a | TPX2     | 0.56  |
| hsa-mir-106a | TRAIP    | 0.54  |
| hsa-mir-106a | TRMT5    | 0.46  |
| hsa-mir-106a | TROAP    | 0.5   |
| hsa-mir-106a | TRPM2    | -0.44 |
| hsa-mir-106a | TTK      | 0.55  |
| hsa-mir-106a | TYMS     | 0.48  |
| hsa-mir-106a | UBE2C    | 0.56  |
| hsa-mir-106a | UBE2T    | 0.43  |
| hsa-mir-106a | UHRF1    | 0.51  |
| hsa-mir-106a | VASN     | -0.33 |
| hsa-mir-106a | WDR51A   | 0.43  |
| hsa-mir-106a | XKR8     | -0.2  |
| hsa-mir-106a | YBX1     | 0.51  |
| hsa-mir-106a | ZNF239   | 0.28  |
| hsa-mir-106a | ZNF300   | 0.58  |
| hsa-mir-106a | ZNF84    | 0.38  |
| hsa-mir-106a | ZWINT    | 0.55  |
| hsa-mir-106b | ADRB2    | -0.42 |
| hsa-mir-106b | ALDH1A1  | -0.41 |
| hsa-mir-106b | ARRDC2   | -0.48 |
| hsa-mir-106b | ASPM     | 0.62  |
| hsa-mir-106b | ATAD5    | 0.59  |
| hsa-mir-106b | ATF7IP2  | -0.51 |
| hsa-mir-106b | BIRC5    | 0.54  |
| hsa-mir-106b | BUB1     | 0.6   |



|              |             |       |
|--------------|-------------|-------|
| hsa-mir-106b | BUB1B       | 0.57  |
| hsa-mir-106b | C15orf42    | 0.55  |
| hsa-mir-106b | C16orf59    | 0.48  |
| hsa-mir-106b | C18orf54    | 0.56  |
| hsa-mir-106b | C19orf57    | 0.51  |
| hsa-mir-106b | C6orf167    | 0.55  |
| hsa-mir-106b | CAMK2N1     | -0.5  |
| hsa-mir-106b | CASC5       | 0.55  |
| hsa-mir-106b | CCDC5       | 0.49  |
| hsa-mir-106b | CCNA2       | 0.53  |
| hsa-mir-106b | CCNB2       | 0.59  |
| hsa-mir-106b | CDC20       | 0.53  |
| hsa-mir-106b | CDC45L      | 0.57  |
| hsa-mir-106b | CDC6        | 0.53  |
| hsa-mir-106b | CDCA5       | 0.52  |
| hsa-mir-106b | CDCA7       | 0.55  |
| hsa-mir-106b | CDCA8       | 0.58  |
| hsa-mir-106b | CDT1        | 0.51  |
| hsa-mir-106b | CENPA       | 0.59  |
| hsa-mir-106b | CENPE       | 0.56  |
| hsa-mir-106b | CENPF       | 0.62  |
| hsa-mir-106b | CENPH       | 0.57  |
| hsa-mir-106b | CENPK       | 0.53  |
| hsa-mir-106b | CENPM       | 0.51  |
| hsa-mir-106b | CHEK1       | 0.58  |
| hsa-mir-106b | CKAP2L      | 0.57  |
| hsa-mir-106b | DBF4        | 0.57  |
| hsa-mir-106b | DEPDC1B     | 0.56  |
| hsa-mir-106b | KFZp762E131 | 0.59  |
| hsa-mir-106b | DLG7        | 0.55  |
| hsa-mir-106b | DTL         | 0.57  |
| hsa-mir-106b | E2F8        | 0.57  |
| hsa-mir-106b | ESCO2       | 0.57  |
| hsa-mir-106b | EXO1        | 0.54  |
| hsa-mir-106b | EZH2        | 0.62  |
| hsa-mir-106b | FAM111B     | 0.5   |
| hsa-mir-106b | FAM54A      | 0.54  |
| hsa-mir-106b | FAM64A      | 0.61  |
| hsa-mir-106b | FAM79A      | -0.53 |
| hsa-mir-106b | FANCC       | 0.6   |
| hsa-mir-106b | FANCE       | 0.5   |
| hsa-mir-106b | FANCI       | 0.61  |
| hsa-mir-106b | FBXO5       | 0.56  |
| hsa-mir-106b | FOXM1       | 0.57  |
| hsa-mir-106b | GDF11       | 0.31  |
| hsa-mir-106b | GINS2       | 0.55  |
| hsa-mir-106b | GINS3       | 0.53  |
| hsa-mir-106b | HELLS       | 0.55  |
| hsa-mir-106b | HIST1H1B    | 0.47  |
| hsa-mir-106b | HMG4L       | 0.49  |
| hsa-mir-106b | HMGB2       | 0.56  |
| hsa-mir-106b | HRASLS5     | -0.33 |
| hsa-mir-106b | HS3ST4      | -0.5  |

|              |           |       |
|--------------|-----------|-------|
| hsa-mir-106b | IQGAP3    | 0.39  |
| hsa-mir-106b | KCNK1     | -0.38 |
| hsa-mir-106b | KIF14     | 0.58  |
| hsa-mir-106b | KIF15     | 0.61  |
| hsa-mir-106b | KIF18A    | 0.56  |
| hsa-mir-106b | KIF23     | 0.56  |
| hsa-mir-106b | KIF2C     | 0.62  |
| hsa-mir-106b | KIF4A     | 0.57  |
| hsa-mir-106b | KIFC1     | 0.58  |
| hsa-mir-106b | KLHL2     | -0.54 |
| hsa-mir-106b | KNTC1     | 0.59  |
| hsa-mir-106b | LIMA1     | 0.45  |
| hsa-mir-106b | LMNB1     | 0.5   |
| hsa-mir-106b | LOC492311 | -0.43 |
| hsa-mir-106b | MAD2L1    | 0.51  |
| hsa-mir-106b | MAL       | -0.47 |
| hsa-mir-106b | MBNL2     | -0.52 |
| hsa-mir-106b | MCM2      | 0.55  |
| hsa-mir-106b | MCM3      | 0.52  |
| hsa-mir-106b | MCM4      | 0.45  |
| hsa-mir-106b | MCM6      | 0.51  |
| hsa-mir-106b | MCM8      | 0.52  |
| hsa-mir-106b | MELK      | 0.58  |
| hsa-mir-106b | MEX3A     | 0.57  |
| hsa-mir-106b | MKI67     | 0.54  |
| hsa-mir-106b | MLF1IP    | 0.58  |
| hsa-mir-106b | MXD3      | 0.51  |
| hsa-mir-106b | NCAPG2    | 0.53  |
| hsa-mir-106b | NDC80     | 0.63  |
| hsa-mir-106b | NEIL3     | 0.59  |
| hsa-mir-106b | NEK2      | 0.49  |
| hsa-mir-106b | NT5DC1    | -0.44 |
| hsa-mir-106b | NUF2      | 0.58  |
| hsa-mir-106b | NUSAP1    | 0.58  |
| hsa-mir-106b | NY-SAR-48 | 0.57  |
| hsa-mir-106b | ODC1      | 0.45  |
| hsa-mir-106b | OIP5      | 0.55  |
| hsa-mir-106b | ORC1L     | 0.51  |
| hsa-mir-106b | PBK       | 0.58  |
| hsa-mir-106b | PLK4      | 0.54  |
| hsa-mir-106b | POLG      | 0.58  |
| hsa-mir-106b | PRNP      | -0.6  |
| hsa-mir-106b | PTTG1     | 0.55  |
| hsa-mir-106b | PTTG2     | 0.56  |
| hsa-mir-106b | PTTG3     | 0.56  |
| hsa-mir-106b | RACGAP1   | 0.53  |
| hsa-mir-106b | RAD51     | 0.55  |
| hsa-mir-106b | RAD54L    | 0.55  |
| hsa-mir-106b | RBBP8     | 0.51  |
| hsa-mir-106b | REEP5     | -0.5  |
| hsa-mir-106b | RFC4      | 0.5   |
| hsa-mir-106b | RNASEH2A  | 0.54  |
| hsa-mir-106b | SELPLG    | -0.43 |

|              |          |       |
|--------------|----------|-------|
| hsa-mir-106b | SH3BP4   | 0.37  |
| hsa-mir-106b | SH3GL3   | -0.34 |
| hsa-mir-106b | SORL1    | -0.37 |
| hsa-mir-106b | SPAG5    | 0.56  |
| hsa-mir-106b | TIMELESS | 0.62  |
| hsa-mir-106b | TOP2A    | 0.61  |
| hsa-mir-106b | TRAIP    | 0.51  |
| hsa-mir-106b | TTK      | 0.58  |
| hsa-mir-106b | UBE2C    | 0.61  |
| hsa-mir-106b | UHRF1    | 0.53  |
| hsa-mir-106b | YBX1     | 0.5   |
| hsa-mir-106b | ZFYVE21  | -0.43 |
| hsa-mir-106b | ZNF300   | 0.55  |
| hsa-mir-106b | ZWINT    | 0.55  |
| hsa-mir-107  | CLIC4    | -0.28 |
| hsa-mir-107  | GABRA2   | 0.39  |
| hsa-mir-107  | JAKMIP1  | 0.36  |
| hsa-mir-107  | NEFL     | 0.32  |
| hsa-mir-107  | SH3GL2   | 0.36  |
| hsa-mir-10a  | DSC3     | -0.11 |
| hsa-mir-10a  | EYA4     | 0.18  |
| hsa-mir-10a  | FAM105A  | -0.05 |
| hsa-mir-10a  | HOTAIR   | 0.31  |
| hsa-mir-10a  | HOXA9    | 0.28  |
| hsa-mir-10a  | HOXB2    | 0.52  |
| hsa-mir-10a  | HOXB3    | 0.58  |
| hsa-mir-10a  | HOXB4    | 0.58  |
| hsa-mir-10a  | HOXB5    | 0.5   |
| hsa-mir-10a  | HOXB6    | 0.47  |
| hsa-mir-10a  | HOXB7    | 0.52  |
| hsa-mir-10a  | HOXB8    | 0.47  |
| hsa-mir-10a  | HOXC8    | 0.23  |
| hsa-mir-10a  | MMP13    | 0.02  |
| hsa-mir-10a  | NUP62CL  | 0.06  |
| hsa-mir-10a  | PITX2    | 0.28  |
| hsa-mir-10a  | PLP1     | -0.34 |
| hsa-mir-10a  | POSTN    | 0.2   |
| hsa-mir-10a  | PRDM13   | 0.36  |
| hsa-mir-10a  | RAG2     | -0.17 |
| hsa-mir-10a  | SALL4    | 0.27  |
| hsa-mir-10a  | SYT4     | -0.08 |
| hsa-mir-10a  | WNT16    | 0.31  |
| hsa-mir-10b  | March9   | 0.33  |
| hsa-mir-10b  | ACCN4    | 0.22  |
| hsa-mir-10b  | AQP1     | 0.21  |
| hsa-mir-10b  | ATP1A3   | -0.33 |
| hsa-mir-10b  | BHMT2    | -0.16 |
| hsa-mir-10b  | C2orf32  | 0.23  |
| hsa-mir-10b  | CDK4     | 0.34  |
| hsa-mir-10b  | CHGB     | 0.06  |
| hsa-mir-10b  | CHST9    | 0.28  |
| hsa-mir-10b  | COL9A1   | 0.36  |
| hsa-mir-10b  | CRB1     | 0.32  |

|             |           |       |
|-------------|-----------|-------|
| hsa-mir-10b | CTTNBP2   | 0.36  |
| hsa-mir-10b | CXCL14    | -0.34 |
| hsa-mir-10b | CXCL6     | -0.25 |
| hsa-mir-10b | CYP27B1   | 0.35  |
| hsa-mir-10b | DCX       | 0.4   |
| hsa-mir-10b | DGCR8     | 0.22  |
| hsa-mir-10b | DOK6      | 0.07  |
| hsa-mir-10b | DPY19L2   | 0.21  |
| hsa-mir-10b | DPY19L2P4 | 0.35  |
| hsa-mir-10b | EBF3      | 0.36  |
| hsa-mir-10b | EN1       | 0.44  |
| hsa-mir-10b | ENDOD1    | -0.4  |
| hsa-mir-10b | ESCO2     | 0.39  |
| hsa-mir-10b | FAM64A    | 0.43  |
| hsa-mir-10b | FLJ22795  | 0.3   |
| hsa-mir-10b | FLJ25791  | 0.32  |
| hsa-mir-10b | FOXN4     | 0.35  |
| hsa-mir-10b | FREM1     | 0.2   |
| hsa-mir-10b | GBX2      | 0.4   |
| hsa-mir-10b | GLCCI1    | 0.4   |
| hsa-mir-10b | GLI1      | -0.05 |
| hsa-mir-10b | HAND2     | 0.46  |
| hsa-mir-10b | HFM1      | 0.43  |
| hsa-mir-10b | HIST1H4C  | 0.32  |
| hsa-mir-10b | HIST1H4L  | 0.28  |
| hsa-mir-10b | HOMER2    | -0.38 |
| hsa-mir-10b | HOTAIR    | 0.41  |
| hsa-mir-10b | HOXA10    | 0.43  |
| hsa-mir-10b | HOXA13    | 0.44  |
| hsa-mir-10b | HOXA2     | 0.4   |
| hsa-mir-10b | HOXA5     | 0.39  |
| hsa-mir-10b | HOXA7     | 0.43  |
| hsa-mir-10b | HOXA9     | 0.44  |
| hsa-mir-10b | HOXC10    | 0.39  |
| hsa-mir-10b | HOXC13    | 0.41  |
| hsa-mir-10b | HOXC8     | 0.45  |
| hsa-mir-10b | HOXC9     | 0.49  |
| hsa-mir-10b | HOXD10    | 0.61  |
| hsa-mir-10b | HOXD11    | 0.56  |
| hsa-mir-10b | HOXD13    | 0.47  |
| hsa-mir-10b | HOXD3     | 0.72  |
| hsa-mir-10b | HOXD8     | 0.54  |
| hsa-mir-10b | HS3ST1    | 0.27  |
| hsa-mir-10b | JPH3      | 0.08  |
| hsa-mir-10b | KIAA1549  | 0.39  |
| hsa-mir-10b | KIF15     | 0.44  |
| hsa-mir-10b | KLRC2     | 0.29  |
| hsa-mir-10b | LMO1      | 0.27  |
| hsa-mir-10b | LRP6      | 0.34  |
| hsa-mir-10b | LUZP2     | 0.22  |
| hsa-mir-10b | LYVE1     | -0.27 |
| hsa-mir-10b | MATN4     | 0.42  |
| hsa-mir-10b | MEX3A     | 0.51  |

|              |           |       |
|--------------|-----------|-------|
| hsa-mir-10b  | MMP7      | -0.09 |
| hsa-mir-10b  | MNX1      | 0.38  |
| hsa-mir-10b  | MOXD1     | -0.27 |
| hsa-mir-10b  | MYT1      | 0.43  |
| hsa-mir-10b  | NBLA00301 | 0.41  |
| hsa-mir-10b  | NKD1      | 0.28  |
| hsa-mir-10b  | NKX2-2    | 0.33  |
| hsa-mir-10b  | ODZ2      | -0.02 |
| hsa-mir-10b  | OVOS2     | 0.39  |
| hsa-mir-10b  | PBK       | 0.38  |
| hsa-mir-10b  | PCDHA9    | 0.27  |
| hsa-mir-10b  | PDE6A     | 0.37  |
| hsa-mir-10b  | PDGFRA    | 0.28  |
| hsa-mir-10b  | PRDM13    | 0.3   |
| hsa-mir-10b  | PROM1     | 0.37  |
| hsa-mir-10b  | REV3L     | 0.39  |
| hsa-mir-10b  | RUNDC3A   | 0.04  |
| hsa-mir-10b  | SALL3     | 0.41  |
| hsa-mir-10b  | SH3GL3    | -0.05 |
| hsa-mir-10b  | SIM2      | 0.58  |
| hsa-mir-10b  | SIX1      | 0.36  |
| hsa-mir-10b  | SIX6      | 0.27  |
| hsa-mir-10b  | SNAP25    | 0.06  |
| hsa-mir-10b  | SOX11     | 0.49  |
| hsa-mir-10b  | SOX6      | 0.37  |
| hsa-mir-10b  | STOX2     | 0.19  |
| hsa-mir-10b  | THSD7A    | 0.43  |
| hsa-mir-10b  | TMSL8     | 0.38  |
| hsa-mir-10b  | TRIM24    | 0.33  |
| hsa-mir-10b  | TSFM      | 0.25  |
| hsa-mir-10b  | TSPAN31   | 0.2   |
| hsa-mir-10b  | TTC12     | -0.23 |
| hsa-mir-10b  | VAX2      | 0.45  |
| hsa-mir-10b  | WDR52     | 0.26  |
| hsa-mir-10b  | ZNF232    | 0.31  |
| hsa-mir-10b  | ZNF300    | 0.49  |
| hsa-mir-124a | March11   | 0.63  |
| hsa-mir-124a | Sept3     | 0.6   |
| hsa-mir-124a | March4    | 0.57  |
| hsa-mir-124a | Sept4     | 0.46  |
| hsa-mir-124a | A2BP1     | 0.8   |
| hsa-mir-124a | AATK      | 0.53  |
| hsa-mir-124a | ABCC12    | 0.5   |
| hsa-mir-124a | ABCC8     | 0.49  |
| hsa-mir-124a | ABCG4     | 0.58  |
| hsa-mir-124a | ABHD12B   | 0.5   |
| hsa-mir-124a | ABHD7     | 0.47  |
| hsa-mir-124a | ABLIM2    | 0.6   |
| hsa-mir-124a | ABR       | 0.35  |
| hsa-mir-124a | ACAD11    | -0.17 |
| hsa-mir-124a | ACCN1     | 0.57  |
| hsa-mir-124a | ACOT7     | 0.46  |
| hsa-mir-124a | ACTA1     | 0.53  |

|              |          |       |
|--------------|----------|-------|
| hsa-mir-124a | ACTL6B   | 0.67  |
| hsa-mir-124a | ACTN2    | 0.29  |
| hsa-mir-124a | ACVR1C   | 0.65  |
| hsa-mir-124a | ADAD2    | 0.6   |
| hsa-mir-124a | ADAM11   | 0.67  |
| hsa-mir-124a | ADAMTS8  | 0.44  |
| hsa-mir-124a | ADARB2   | 0.59  |
| hsa-mir-124a | ADCY2    | 0.39  |
| hsa-mir-124a | ADCYAP1  | 0.54  |
| hsa-mir-124a | ADPRHL1  | 0.43  |
| hsa-mir-124a | ADRA1B   | 0.53  |
| hsa-mir-124a | ADRA2A   | 0.24  |
| hsa-mir-124a | ADRA2C   | 0.51  |
| hsa-mir-124a | AEBP1    | -0.28 |
| hsa-mir-124a | AFF2     | 0.51  |
| hsa-mir-124a | AGTPBP1  | 0.49  |
| hsa-mir-124a | AGXT2L1  | 0.55  |
| hsa-mir-124a | AIFM3    | 0.49  |
| hsa-mir-124a | AK5      | 0.76  |
| hsa-mir-124a | AKAP11   | 0.53  |
| hsa-mir-124a | AKAP5    | 0.48  |
| hsa-mir-124a | ALDH1A3  | 0.09  |
| hsa-mir-124a | ALDOC    | 0.43  |
| hsa-mir-124a | AMN1     | 0.55  |
| hsa-mir-124a | AMPH     | 0.63  |
| hsa-mir-124a | AMZ1     | 0.43  |
| hsa-mir-124a | ANG      | -0.45 |
| hsa-mir-124a | ANK3     | 0.61  |
| hsa-mir-124a | ANKRD25  | -0.45 |
| hsa-mir-124a | ANKRD34  | 0.58  |
| hsa-mir-124a | ANKRD43  | 0.61  |
| hsa-mir-124a | ANKRD46  | 0.52  |
| hsa-mir-124a | ANKRD55  | 0.54  |
| hsa-mir-124a | ANKS1B   | 0.63  |
| hsa-mir-124a | AP3M2    | 0.45  |
| hsa-mir-124a | APAF1    | -0.19 |
| hsa-mir-124a | APBA2    | 0.43  |
| hsa-mir-124a | APOBEC3B | -0.39 |
| hsa-mir-124a | APP      | 0.01  |
| hsa-mir-124a | ARHGDIG  | 0.75  |
| hsa-mir-124a | ARHGEF7  | 0.74  |
| hsa-mir-124a | ARMC3    | 0.15  |
| hsa-mir-124a | ARP11    | 0.34  |
| hsa-mir-124a | ARPP-21  | 0.62  |
| hsa-mir-124a | ARSJ     | -0.48 |
| hsa-mir-124a | ASPHD1   | 0.37  |
| hsa-mir-124a | ASPM     | -0.21 |
| hsa-mir-124a | ASXL3    | 0.51  |
| hsa-mir-124a | ATCAY    | 0.58  |
| hsa-mir-124a | ATOH7    | 0.57  |
| hsa-mir-124a | ATP1B1   | 0.6   |
| hsa-mir-124a | ATP2B2   | 0.53  |
| hsa-mir-124a | ATP2B3   | 0.71  |

|              |           |       |
|--------------|-----------|-------|
| hsa-mir-124a | ATP6V0A1  | 0.54  |
| hsa-mir-124a | ATP6V1A   | 0.49  |
| hsa-mir-124a | ATP6V1G2  | 0.64  |
| hsa-mir-124a | ATP8A2    | 0.61  |
| hsa-mir-124a | ATP9A     | 0.44  |
| hsa-mir-124a | ATRNL1    | 0.67  |
| hsa-mir-124a | B3GALT2   | 0.51  |
| hsa-mir-124a | B3GNT4    | 0.48  |
| hsa-mir-124a | B4GALNT1  | 0.4   |
| hsa-mir-124a | B4GALT6   | 0.54  |
| hsa-mir-124a | BAIAP3    | 0.29  |
| hsa-mir-124a | BASP1     | 0.64  |
| hsa-mir-124a | BCAS1     | 0.53  |
| hsa-mir-124a | BCL11A    | 0.59  |
| hsa-mir-124a | BCL11B    | 0.42  |
| hsa-mir-124a | BCL2L12   | -0.58 |
| hsa-mir-124a | BEGAIN    | 0.48  |
| hsa-mir-124a | BEST3     | -0.02 |
| hsa-mir-124a | BEX1      | 0.52  |
| hsa-mir-124a | BEX2      | 0.63  |
| hsa-mir-124a | BEX5      | 0.67  |
| hsa-mir-124a | BHLHB5    | 0.66  |
| hsa-mir-124a | BHMT2     | 0.21  |
| hsa-mir-124a | BRSK2     | 0.63  |
| hsa-mir-124a | BRUNOL4   | 0.85  |
| hsa-mir-124a | BRUNOL5   | 0.74  |
| hsa-mir-124a | BSCL2     | 0.43  |
| hsa-mir-124a | BSN       | 0.76  |
| hsa-mir-124a | BUB1      | -0.32 |
| hsa-mir-124a | BZRAP1    | 0.54  |
| hsa-mir-124a | C10orf116 | 0.36  |
| hsa-mir-124a | C10orf35  | 0.49  |
| hsa-mir-124a | C10orf38  | 0.51  |
| hsa-mir-124a | C10orf67  | 0.22  |
| hsa-mir-124a | C11orf41  | 0.56  |
| hsa-mir-124a | C12orf34  | 0.43  |
| hsa-mir-124a | C12orf51  | 0.31  |
| hsa-mir-124a | C13orf16  | 0.59  |
| hsa-mir-124a | C14orf132 | 0.45  |
| hsa-mir-124a | C16orf5   | 0.49  |
| hsa-mir-124a | C18orf56  | 0.26  |
| hsa-mir-124a | C19orf30  | 0.71  |
| hsa-mir-124a | C1orf115  | 0.6   |
| hsa-mir-124a | C1orf165  | 0.29  |
| hsa-mir-124a | C1orf216  | 0.49  |
| hsa-mir-124a | C1orf78   | -0.51 |
| hsa-mir-124a | C1QL2     | 0.49  |
| hsa-mir-124a | C1QL3     | 0.63  |
| hsa-mir-124a | C1QTNF4   | 0.76  |
| hsa-mir-124a | C20orf103 | 0.45  |
| hsa-mir-124a | C20orf174 | 0.57  |
| hsa-mir-124a | C20orf177 | 0.49  |
| hsa-mir-124a | C20orf39  | 0.43  |

|              |          |       |
|--------------|----------|-------|
| hsa-mir-124a | C2orf21  | 0.41  |
| hsa-mir-124a | C2orf32  | 0.54  |
| hsa-mir-124a | C2orf40  | 0.31  |
| hsa-mir-124a | C3orf41  | 0.1   |
| hsa-mir-124a | C5orf30  | 0.57  |
| hsa-mir-124a | C5orf40  | 0.6   |
| hsa-mir-124a | C6orf114 | 0.65  |
| hsa-mir-124a | C6orf117 | 0.27  |
| hsa-mir-124a | C6orf142 | 0.25  |
| hsa-mir-124a | C6orf154 | 0.48  |
| hsa-mir-124a | C6orf159 | 0.53  |
| hsa-mir-124a | C6orf168 | 0.45  |
| hsa-mir-124a | C7orf16  | 0.46  |
| hsa-mir-124a | C7orf41  | 0.62  |
| hsa-mir-124a | C8orf47  | 0.53  |
| hsa-mir-124a | C9orf125 | 0.64  |
| hsa-mir-124a | C9orf164 | 0.58  |
| hsa-mir-124a | C9orf24  | 0.39  |
| hsa-mir-124a | C9orf4   | 0.64  |
| hsa-mir-124a | C9orf45  | 0.57  |
| hsa-mir-124a | CA10     | 0.62  |
| hsa-mir-124a | CA11     | 0.53  |
| hsa-mir-124a | CA3      | -0.19 |
| hsa-mir-124a | CABP1    | 0.78  |
| hsa-mir-124a | CABYR    | 0.59  |
| hsa-mir-124a | CACNA2D3 | 0.57  |
| hsa-mir-124a | CACNB1   | 0.65  |
| hsa-mir-124a | CACNB3   | 0.48  |
| hsa-mir-124a | CACNG2   | 0.65  |
| hsa-mir-124a | CACNG3   | 0.76  |
| hsa-mir-124a | CADM3    | 0.33  |
| hsa-mir-124a | CADPS    | 0.31  |
| hsa-mir-124a | CALB1    | 0.27  |
| hsa-mir-124a | CALB2    | 0.52  |
| hsa-mir-124a | CALN1    | 0.56  |
| hsa-mir-124a | CAMK1D   | 0.56  |
| hsa-mir-124a | CAMK1G   | 0.64  |
| hsa-mir-124a | CAMK2A   | 0.6   |
| hsa-mir-124a | CAMK2B   | 0.32  |
| hsa-mir-124a | CAMK2G   | 0.57  |
| hsa-mir-124a | CAMK2N1  | 0.38  |
| hsa-mir-124a | CAMKK1   | 0.67  |
| hsa-mir-124a | CAMKV    | 0.78  |
| hsa-mir-124a | CAMSAP1  | 0.31  |
| hsa-mir-124a | CAMTA1   | 0.59  |
| hsa-mir-124a | CAP2     | 0.46  |
| hsa-mir-124a | CARTPT   | 0.67  |
| hsa-mir-124a | CASC5    | -0.18 |
| hsa-mir-124a | CASP6    | -0.42 |
| hsa-mir-124a | CASQ2    | 0.31  |
| hsa-mir-124a | CBFA2T3  | 0.58  |
| hsa-mir-124a | CBLN1    | 0.5   |
| hsa-mir-124a | CBLN2    | 0.73  |



|              |          |       |
|--------------|----------|-------|
| hsa-mir-124a | CBLN4    | 0.32  |
| hsa-mir-124a | CCDC102A | -0.48 |
| hsa-mir-124a | CCDC76   | -0.12 |
| hsa-mir-124a | CCDC80   | -0.4  |
| hsa-mir-124a | CCDC85A  | 0.64  |
| hsa-mir-124a | CCK      | 0.78  |
| hsa-mir-124a | CCKBR    | 0.71  |
| hsa-mir-124a | CCNA1    | 0.38  |
| hsa-mir-124a | CCR6     | 0.16  |
| hsa-mir-124a | CD200    | 0.62  |
| hsa-mir-124a | CD48     | -0.29 |
| hsa-mir-124a | CD97     | -0.47 |
| hsa-mir-124a | CDH12    | 0.66  |
| hsa-mir-124a | CDH13    | 0.53  |
| hsa-mir-124a | CDH18    | 0.76  |
| hsa-mir-124a | CDH19    | 0.28  |
| hsa-mir-124a | CDH22    | 0.7   |
| hsa-mir-124a | CDH7     | 0.53  |
| hsa-mir-124a | CDH8     | 0.7   |
| hsa-mir-124a | CDH9     | 0.64  |
| hsa-mir-124a | CDK5R1   | 0.67  |
| hsa-mir-124a | CDKL2    | 0.57  |
| hsa-mir-124a | CDKL5    | 0.64  |
| hsa-mir-124a | CDKN2C   | -0.23 |
| hsa-mir-124a | CDKN2D   | 0.59  |
| hsa-mir-124a | CDR1     | 0.64  |
| hsa-mir-124a | CDS1     | 0.44  |
| hsa-mir-124a | CENPK    | -0.28 |
| hsa-mir-124a | CENTA1   | 0.61  |
| hsa-mir-124a | CENTG1   | 0.43  |
| hsa-mir-124a | CEP55    | -0.38 |
| hsa-mir-124a | CHD5     | 0.78  |
| hsa-mir-124a | CHGA     | 0.82  |
| hsa-mir-124a | CHGB     | 0.61  |
| hsa-mir-124a | CHIC1    | 0.42  |
| hsa-mir-124a | CHN1     | 0.54  |
| hsa-mir-124a | CHPF     | -0.35 |
| hsa-mir-124a | CHRM2    | 0.39  |
| hsa-mir-124a | CHRNA2   | 0.58  |
| hsa-mir-124a | CHST9    | -0.03 |
| hsa-mir-124a | CISD1    | 0.46  |
| hsa-mir-124a | CIT      | 0.47  |
| hsa-mir-124a | CKMT1A   | 0.76  |
| hsa-mir-124a | CLASP2   | 0.61  |
| hsa-mir-124a | CLCA4    | 0.57  |
| hsa-mir-124a | CLDN11   | 0.42  |
| hsa-mir-124a | CLEC2L   | 0.7   |
| hsa-mir-124a | CLEC3B   | 0.1   |
| hsa-mir-124a | CLGN     | 0.32  |
| hsa-mir-124a | CLTB     | 0.74  |
| hsa-mir-124a | CLUL1    | 0.3   |
| hsa-mir-124a | CMTM3    | -0.55 |
| hsa-mir-124a | CMTM4    | 0.45  |

|              |          |       |
|--------------|----------|-------|
| hsa-mir-124a | CMTM6    | -0.39 |
| hsa-mir-124a | CNDP1    | 0.48  |
| hsa-mir-124a | CNKSR2   | 0.66  |
| hsa-mir-124a | CNTN1    | 0.45  |
| hsa-mir-124a | CNTN3    | 0.63  |
| hsa-mir-124a | CNTN4    | 0.66  |
| hsa-mir-124a | CNTN6    | 0.49  |
| hsa-mir-124a | CNTNAP2  | 0.63  |
| hsa-mir-124a | CNTNAP4  | 0.57  |
| hsa-mir-124a | CNTNAP5  | 0.6   |
| hsa-mir-124a | COL1A1   | -0.36 |
| hsa-mir-124a | COL23A1  | -0.08 |
| hsa-mir-124a | COL3A1   | -0.38 |
| hsa-mir-124a | COL9A1   | 0.27  |
| hsa-mir-124a | CORO6    | 0.52  |
| hsa-mir-124a | CP110    | 0.41  |
| hsa-mir-124a | CPAMD8   | 0.37  |
| hsa-mir-124a | CPEB3    | 0.67  |
| hsa-mir-124a | CPLX1    | 0.71  |
| hsa-mir-124a | CPLX2    | 0.76  |
| hsa-mir-124a | CPLX3    | 0.58  |
| hsa-mir-124a | CPNE6    | 0.63  |
| hsa-mir-124a | CPNE7    | 0.42  |
| hsa-mir-124a | CPXM2    | 0.16  |
| hsa-mir-124a | CREG2    | 0.75  |
| hsa-mir-124a | CRH      | 0.43  |
| hsa-mir-124a | CRHBP    | 0.68  |
| hsa-mir-124a | CRISPLD1 | -0.15 |
| hsa-mir-124a | CRLF1    | 0.29  |
| hsa-mir-124a | CRTAC1   | 0.71  |
| hsa-mir-124a | CRYBA2   | 0.38  |
| hsa-mir-124a | CRYM     | 0.71  |
| hsa-mir-124a | CSMD1    | 0.45  |
| hsa-mir-124a | CSR2     | -0.41 |
| hsa-mir-124a | CTXN3    | 0.64  |
| hsa-mir-124a | CUL3     | 0.54  |
| hsa-mir-124a | CUTL2    | 0.76  |
| hsa-mir-124a | CYFIP2   | 0.63  |
| hsa-mir-124a | CYP26A1  | 0.25  |
| hsa-mir-124a | CYP26B1  | 0.44  |
| hsa-mir-124a | CYP4X1   | 0.71  |
| hsa-mir-124a | DAAM2    | 0.43  |
| hsa-mir-124a | DACH2    | 0.71  |
| hsa-mir-124a | DACT2    | 0.4   |
| hsa-mir-124a | DACT3    | 0.55  |
| hsa-mir-124a | DAGLA    | 0.35  |
| hsa-mir-124a | DBC1     | 0.63  |
| hsa-mir-124a | DCLK1    | 0.45  |
| hsa-mir-124a | DCX      | 0.4   |
| hsa-mir-124a | DDN      | 0.57  |
| hsa-mir-124a | DDX25    | 0.5   |
| hsa-mir-124a | DEFA3    | 0     |
| hsa-mir-124a | DEPDC1B  | -0.09 |

|              |             |       |
|--------------|-------------|-------|
| hsa-mir-124a | DGKB        | 0.49  |
| hsa-mir-124a | DGKI        | 0.43  |
| hsa-mir-124a | DHRS9       | 0.44  |
| hsa-mir-124a | DIRAS2      | 0.45  |
| hsa-mir-124a | DISP2       | 0.47  |
| hsa-mir-124a | KFZP564O082 | 0.34  |
| hsa-mir-124a | DKK1        | -0.23 |
| hsa-mir-124a | DLEU7       | 0.63  |
| hsa-mir-124a | DLG2        | 0.69  |
| hsa-mir-124a | DLGAP1      | 0.42  |
| hsa-mir-124a | DLGAP2      | 0.67  |
| hsa-mir-124a | DLL3        | 0.32  |
| hsa-mir-124a | DLX1        | 0.31  |
| hsa-mir-124a | DLX2        | 0.3   |
| hsa-mir-124a | DLX6        | 0.38  |
| hsa-mir-124a | DMRT2       | 0.29  |
| hsa-mir-124a | DNAJA4      | 0.49  |
| hsa-mir-124a | DNAJC12     | 0.52  |
| hsa-mir-124a | DNAJC6      | 0.64  |
| hsa-mir-124a | DNM1        | 0.7   |
| hsa-mir-124a | DNM3        | 0.62  |
| hsa-mir-124a | DOC2A       | 0.66  |
| hsa-mir-124a | DOCK3       | 0.55  |
| hsa-mir-124a | DOCK9       | 0.46  |
| hsa-mir-124a | DOK6        | 0.68  |
| hsa-mir-124a | DOPEY1      | 0.42  |
| hsa-mir-124a | DPF1        | 0.52  |
| hsa-mir-124a | DPP10       | 0.61  |
| hsa-mir-124a | DPP4        | -0.4  |
| hsa-mir-124a | DPY19L2P4   | 0.31  |
| hsa-mir-124a | DRD1        | 0.61  |
| hsa-mir-124a | DRD1IP      | 0.75  |
| hsa-mir-124a | DRD5        | 0.5   |
| hsa-mir-124a | DSCAML1     | 0.55  |
| hsa-mir-124a | DUSP26      | 0.66  |
| hsa-mir-124a | DUSP8       | 0.6   |
| hsa-mir-124a | DYDC2       | 0.49  |
| hsa-mir-124a | DYNC111     | 0.68  |
| hsa-mir-124a | DZIP3       | 0.52  |
| hsa-mir-124a | EDG8        | 0.5   |
| hsa-mir-124a | EDIL3       | 0.52  |
| hsa-mir-124a | EDN3        | 0.26  |
| hsa-mir-124a | EEF1A2      | 0.53  |
| hsa-mir-124a | EFCBP1      | 0.5   |
| hsa-mir-124a | EFCBP2      | 0.66  |
| hsa-mir-124a | EFHA2       | 0.69  |
| hsa-mir-124a | EFNA4       | -0.43 |
| hsa-mir-124a | EGR3        | 0.39  |
| hsa-mir-124a | EHD3        | 0.58  |
| hsa-mir-124a | EID2B       | 0.43  |
| hsa-mir-124a | EID3        | 0.02  |
| hsa-mir-124a | EIF4E2      | -0.5  |
| hsa-mir-124a | ELAVL4      | 0.62  |

|              |          |       |
|--------------|----------|-------|
| hsa-mir-124a | ELF1     | -0.29 |
| hsa-mir-124a | ELOVL4   | 0.49  |
| hsa-mir-124a | ELOVL7   | 0.46  |
| hsa-mir-124a | ENC1     | 0.57  |
| hsa-mir-124a | ENPP5    | 0.25  |
| hsa-mir-124a | ENPP6    | 0.26  |
| hsa-mir-124a | ENTPD3   | 0.49  |
| hsa-mir-124a | EPB41L1  | 0.58  |
| hsa-mir-124a | EPB41L4B | 0.46  |
| hsa-mir-124a | EPB49    | 0.61  |
| hsa-mir-124a | EPHA10   | 0.65  |
| hsa-mir-124a | EPHA5    | 0.29  |
| hsa-mir-124a | EPHB6    | 0.6   |
| hsa-mir-124a | EPN3     | 0.45  |
| hsa-mir-124a | ERBB4    | 0.4   |
| hsa-mir-124a | ERC2     | 0.76  |
| hsa-mir-124a | ESCO2    | -0.19 |
| hsa-mir-124a | EXTL1    | 0.58  |
| hsa-mir-124a | EYA4     | -0.28 |
| hsa-mir-124a | F12      | 0.29  |
| hsa-mir-124a | F2R      | -0.44 |
| hsa-mir-124a | FA2H     | 0.58  |
| hsa-mir-124a | FABP6    | 0.61  |
| hsa-mir-124a | FAM101A  | 0.31  |
| hsa-mir-124a | FAM107B  | 0.44  |
| hsa-mir-124a | FAM111A  | -0.41 |
| hsa-mir-124a | FAM111B  | -0.18 |
| hsa-mir-124a | FAM123A  | 0.41  |
| hsa-mir-124a | FAM133A  | 0.49  |
| hsa-mir-124a | FAM19A1  | 0.6   |
| hsa-mir-124a | FAM19A2  | 0.69  |
| hsa-mir-124a | FAM19A4  | 0.57  |
| hsa-mir-124a | FAM19A5  | 0.46  |
| hsa-mir-124a | FAM55A   | -0.11 |
| hsa-mir-124a | FAM57B   | 0.6   |
| hsa-mir-124a | FAM64A   | -0.22 |
| hsa-mir-124a | FAM76B   | -0.06 |
| hsa-mir-124a | FAM77C   | 0.53  |
| hsa-mir-124a | FAM79A   | 0.46  |
| hsa-mir-124a | FAM81A   | 0.55  |
| hsa-mir-124a | FBXL15   | 0.5   |
| hsa-mir-124a | FBXL16   | 0.77  |
| hsa-mir-124a | FBXL2    | 0.47  |
| hsa-mir-124a | FBXO15   | 0.34  |
| hsa-mir-124a | FBXO2    | 0.61  |
| hsa-mir-124a | FBXO40   | 0.52  |
| hsa-mir-124a | FBXO41   | 0.63  |
| hsa-mir-124a | FBXW7    | 0.6   |
| hsa-mir-124a | FCHO1    | 0.5   |
| hsa-mir-124a | FEZF2    | 0.63  |
| hsa-mir-124a | FGF12    | 0.51  |
| hsa-mir-124a | FGF13    | 0.68  |
| hsa-mir-124a | FGF9     | 0.68  |

|              |           |       |
|--------------|-----------|-------|
| hsa-mir-124a | FGFBP2    | -0.03 |
| hsa-mir-124a | FHOD3     | 0.43  |
| hsa-mir-124a | FLJ10781  | 0.46  |
| hsa-mir-124a | FLJ20160  | 0.47  |
| hsa-mir-124a | FLJ21963  | -0.46 |
| hsa-mir-124a | FLJ25006  | 0.38  |
| hsa-mir-124a | FLJ33534  | 0.55  |
| hsa-mir-124a | FLJ37464  | 0.61  |
| hsa-mir-124a | FLJ40142  | 0.48  |
| hsa-mir-124a | FLRT2     | 0.35  |
| hsa-mir-124a | FLRT3     | 0.3   |
| hsa-mir-124a | FNDC3B    | -0.51 |
| hsa-mir-124a | FNDC5     | 0.55  |
| hsa-mir-124a | FOLH1     | 0.4   |
| hsa-mir-124a | FOXD4L2   | 0.43  |
| hsa-mir-124a | FREQ      | 0.53  |
| hsa-mir-124a | FRMPD4    | 0.7   |
| hsa-mir-124a | FSTL1     | -0.43 |
| hsa-mir-124a | FSTL4     | 0.48  |
| hsa-mir-124a | FSTL5     | 0.62  |
| hsa-mir-124a | FUT9      | 0.61  |
| hsa-mir-124a | FXVD7     | 0.47  |
| hsa-mir-124a | FZD7      | -0.47 |
| hsa-mir-124a | GABARAPL1 | 0.52  |
| hsa-mir-124a | GABARAPL3 | 0.57  |
| hsa-mir-124a | GABBR1    | 0.51  |
| hsa-mir-124a | GABBR2    | 0.51  |
| hsa-mir-124a | GABRA1    | 0.77  |
| hsa-mir-124a | GABRA2    | 0.62  |
| hsa-mir-124a | GABRA4    | 0.66  |
| hsa-mir-124a | GABRA5    | 0.68  |
| hsa-mir-124a | GABRB1    | 0.43  |
| hsa-mir-124a | GABRB3    | 0.63  |
| hsa-mir-124a | GABRG1    | 0.65  |
| hsa-mir-124a | GABRG2    | 0.78  |
| hsa-mir-124a | GAD1      | 0.49  |
| hsa-mir-124a | GAD2      | 0.72  |
| hsa-mir-124a | GAL3ST1   | 0.5   |
| hsa-mir-124a | GALNT13   | 0.38  |
| hsa-mir-124a | GALNT14   | 0.47  |
| hsa-mir-124a | GALNT3    | -0.01 |
| hsa-mir-124a | GALNT9    | 0.51  |
| hsa-mir-124a | GALNTL4   | 0.23  |
| hsa-mir-124a | GALNTL5   | 0.76  |
| hsa-mir-124a | GAS1      | -0.21 |
| hsa-mir-124a | GAS2      | 0.11  |
| hsa-mir-124a | GAST      | 0.51  |
| hsa-mir-124a | GBP1      | -0.35 |
| hsa-mir-124a | GDA       | 0.57  |
| hsa-mir-124a | GDAP1     | 0.48  |
| hsa-mir-124a | GDAP1L1   | 0.57  |
| hsa-mir-124a | GDF10     | 0.48  |
| hsa-mir-124a | GDF15     | -0.44 |

|              |         |       |
|--------------|---------|-------|
| hsa-mir-124a | GDPD1   | 0.39  |
| hsa-mir-124a | GFOD1   | 0.61  |
| hsa-mir-124a | GFRA2   | 0.45  |
| hsa-mir-124a | GGTA1   | 0.22  |
| hsa-mir-124a | GJB5    | 0.51  |
| hsa-mir-124a | GJB6    | 0.61  |
| hsa-mir-124a | GLRA2   | 0.4   |
| hsa-mir-124a | GLRB    | 0.49  |
| hsa-mir-124a | GLS     | 0.58  |
| hsa-mir-124a | GLS2    | 0.65  |
| hsa-mir-124a | GLT1D1  | 0.7   |
| hsa-mir-124a | GNAI1   | 0.56  |
| hsa-mir-124a | GNAO1   | 0.64  |
| hsa-mir-124a | GNAZ    | 0.49  |
| hsa-mir-124a | GNG3    | 0.7   |
| hsa-mir-124a | GOLSYN  | 0.3   |
| hsa-mir-124a | GOT1    | 0.6   |
| hsa-mir-124a | GPC5    | 0.38  |
| hsa-mir-124a | GPD1    | 0.35  |
| hsa-mir-124a | GPR155  | 0.4   |
| hsa-mir-124a | GPR158  | 0.33  |
| hsa-mir-124a | GPR17   | 0.4   |
| hsa-mir-124a | GPR22   | 0.64  |
| hsa-mir-124a | GPR26   | 0.73  |
| hsa-mir-124a | GPR88   | 0.33  |
| hsa-mir-124a | GPRASP1 | 0.49  |
| hsa-mir-124a | GPRASP2 | 0.54  |
| hsa-mir-124a | GPRIN1  | 0.51  |
| hsa-mir-124a | GRASP   | 0.48  |
| hsa-mir-124a | GREM2   | 0.63  |
| hsa-mir-124a | GRIA2   | 0.47  |
| hsa-mir-124a | GRIN1   | 0.55  |
| hsa-mir-124a | GRIN2A  | 0.58  |
| hsa-mir-124a | GRIN2C  | 0.43  |
| hsa-mir-124a | GRIN3A  | 0.63  |
| hsa-mir-124a | GRM1    | 0.59  |
| hsa-mir-124a | GRM3    | 0.53  |
| hsa-mir-124a | GRM5    | 0.58  |
| hsa-mir-124a | GRM7    | 0.63  |
| hsa-mir-124a | GRP     | 0.5   |
| hsa-mir-124a | GSC     | -0.4  |
| hsa-mir-124a | GUCA2B  | 0.57  |
| hsa-mir-124a | GUCY1B3 | 0.5   |
| hsa-mir-124a | GYS1    | -0.32 |
| hsa-mir-124a | HAND2   | 0.15  |
| hsa-mir-124a | HAPLN2  | 0.49  |
| hsa-mir-124a | HCN1    | 0.75  |
| hsa-mir-124a | HDGFRP3 | 0.51  |
| hsa-mir-124a | HECW1   | 0.7   |
| hsa-mir-124a | HERC1   | 0.48  |
| hsa-mir-124a | HES5    | 0.34  |
| hsa-mir-124a | HHATL   | 0.57  |
| hsa-mir-124a | HHIP    | 0.28  |

|              |           |       |
|--------------|-----------|-------|
| hsa-mir-124a | HIST1H1B  | -0.21 |
| hsa-mir-124a | HIST1H1D  | -0.32 |
| hsa-mir-124a | HIST1H4J  | -0.29 |
| hsa-mir-124a | HLA-B     | -0.36 |
| hsa-mir-124a | HMGCLL1   | 0.57  |
| hsa-mir-124a | HMP19     | 0.76  |
| hsa-mir-124a | HOMER1    | 0.36  |
| hsa-mir-124a | HPCAL4    | 0.72  |
| hsa-mir-124a | HR        | 0.47  |
| hsa-mir-124a | HRASLS    | 0.3   |
| hsa-mir-124a | HRNBP3    | 0.7   |
| hsa-mir-124a | HS3ST2    | 0.61  |
| hsa-mir-124a | HS3ST4    | 0.65  |
| hsa-mir-124a | HS3ST5    | 0.38  |
| hsa-mir-124a | HS6ST3    | 0.67  |
| hsa-mir-124a | HSP90AA6P | 0.12  |
| hsa-mir-124a | HSPA12A   | 0.71  |
| hsa-mir-124a | HSPA6     | -0.44 |
| hsa-mir-124a | HSPB3     | 0.63  |
| hsa-mir-124a | HTR1E     | 0.56  |
| hsa-mir-124a | HTR2A     | 0.62  |
| hsa-mir-124a | HTR2C     | 0.6   |
| hsa-mir-124a | HTR5A     | 0.77  |
| hsa-mir-124a | ICAM5     | 0.63  |
| hsa-mir-124a | IGSF21    | 0.46  |
| hsa-mir-124a | IL1RAPL1  | 0.63  |
| hsa-mir-124a | INA       | 0.75  |
| hsa-mir-124a | INPP5A    | 0.56  |
| hsa-mir-124a | INPP5F    | 0.58  |
| hsa-mir-124a | INSM2     | 0.55  |
| hsa-mir-124a | IQCA      | 0.38  |
| hsa-mir-124a | ISG15     | 0.01  |
| hsa-mir-124a | ISLR2     | 0.48  |
| hsa-mir-124a | ITPKA     | 0.45  |
| hsa-mir-124a | JAKMIP1   | 0.72  |
| hsa-mir-124a | JPH3      | 0.78  |
| hsa-mir-124a | JTV1      | -0.2  |
| hsa-mir-124a | JUB       | -0.5  |
| hsa-mir-124a | KALRN     | 0.64  |
| hsa-mir-124a | KBTBD11   | 0.44  |
| hsa-mir-124a | KCNA1     | 0.5   |
| hsa-mir-124a | KCNA4     | 0.6   |
| hsa-mir-124a | KCNA5     | 0.46  |
| hsa-mir-124a | KCNAB1    | 0.57  |
| hsa-mir-124a | KCNB1     | 0.6   |
| hsa-mir-124a | KCNB2     | 0.66  |
| hsa-mir-124a | KCNC1     | 0.46  |
| hsa-mir-124a | KCNC2     | 0.79  |
| hsa-mir-124a | KCNC3     | 0.54  |
| hsa-mir-124a | KCND2     | 0.35  |
| hsa-mir-124a | KCNH3     | 0.58  |
| hsa-mir-124a | KCNH8     | 0.48  |
| hsa-mir-124a | KCNIP4    | 0.39  |

|              |           |       |
|--------------|-----------|-------|
| hsa-mir-124a | KCNJ12    | 0.68  |
| hsa-mir-124a | KCNJ3     | 0.67  |
| hsa-mir-124a | KCNJ6     | 0.31  |
| hsa-mir-124a | KCNJ8     | -0.19 |
| hsa-mir-124a | KCNK1     | 0.75  |
| hsa-mir-124a | KCNK12    | 0.56  |
| hsa-mir-124a | KCNK2     | 0.41  |
| hsa-mir-124a | KCNMA1    | 0.58  |
| hsa-mir-124a | KCNMB2    | 0.43  |
| hsa-mir-124a | KCNMB4    | 0.32  |
| hsa-mir-124a | KCNN1     | 0.56  |
| hsa-mir-124a | KCNS1     | 0.57  |
| hsa-mir-124a | KCNS3     | 0.29  |
| hsa-mir-124a | KCNV1     | 0.67  |
| hsa-mir-124a | KCTD1     | 0.44  |
| hsa-mir-124a | KCTD16    | 0.68  |
| hsa-mir-124a | KCTD4     | 0.67  |
| hsa-mir-124a | KCTD8     | 0.45  |
| hsa-mir-124a | KHDRBS2   | 0.66  |
| hsa-mir-124a | KIAA0284  | 0.51  |
| hsa-mir-124a | KIAA0319  | 0.58  |
| hsa-mir-124a | KIAA0427  | 0.57  |
| hsa-mir-124a | KIAA0513  | 0.65  |
| hsa-mir-124a | KIAA0574  | 0.41  |
| hsa-mir-124a | KIAA0748  | 0.57  |
| hsa-mir-124a | KIAA0774  | 0.69  |
| hsa-mir-124a | KIAA0888  | 0.48  |
| hsa-mir-124a | KIAA0984  | 0.51  |
| hsa-mir-124a | KIAA1045  | 0.69  |
| hsa-mir-124a | KIAA1086  | 0.6   |
| hsa-mir-124a | KIAA1107  | 0.74  |
| hsa-mir-124a | KIAA1128  | 0.49  |
| hsa-mir-124a | KIAA1189  | 0.53  |
| hsa-mir-124a | KIAA1239  | 0.7   |
| hsa-mir-124a | KIAA1244  | 0.56  |
| hsa-mir-124a | KIAA1324  | 0.47  |
| hsa-mir-124a | KIAA1324L | 0.41  |
| hsa-mir-124a | KIAA1377  | 0.27  |
| hsa-mir-124a | KIAA1394  | 0.53  |
| hsa-mir-124a | KIAA1409  | 0.44  |
| hsa-mir-124a | KIAA1576  | 0.37  |
| hsa-mir-124a | KIAA1598  | 0.59  |
| hsa-mir-124a | KIAA1618  | -0.23 |
| hsa-mir-124a | KIAA1622  | 0.61  |
| hsa-mir-124a | KIAA1853  | 0.74  |
| hsa-mir-124a | KIAA1957  | 0.58  |
| hsa-mir-124a | KIAA2022  | 0.45  |
| hsa-mir-124a | KIF18A    | -0.23 |
| hsa-mir-124a | KIF1A     | 0.6   |
| hsa-mir-124a | KIF3A     | 0.57  |
| hsa-mir-124a | KIF5A     | 0.65  |
| hsa-mir-124a | KIF5C     | 0.59  |
| hsa-mir-124a | KIF6      | 0.54  |



|              |           |       |
|--------------|-----------|-------|
| hsa-mir-124a | KIRREL3   | 0.55  |
| hsa-mir-124a | KIT       | 0.47  |
| hsa-mir-124a | KLHL1     | 0.68  |
| hsa-mir-124a | KLHL32    | 0.55  |
| hsa-mir-124a | KLK6      | 0.49  |
| hsa-mir-124a | KLK7      | 0.61  |
| hsa-mir-124a | KLRC2     | 0.32  |
| hsa-mir-124a | KLRC3     | 0.36  |
| hsa-mir-124a | KNTC1     | -0.22 |
| hsa-mir-124a | KRT222P   | 0.79  |
| hsa-mir-124a | KSR2      | 0.7   |
| hsa-mir-124a | KY        | 0.37  |
| hsa-mir-124a | LAMC1     | -0.52 |
| hsa-mir-124a | LANCL1    | 0.61  |
| hsa-mir-124a | LARGE     | 0.58  |
| hsa-mir-124a | LDB3      | 0.53  |
| hsa-mir-124a | LGALS3    | -0.37 |
| hsa-mir-124a | LGI2      | 0.25  |
| hsa-mir-124a | LGI3      | 0.6   |
| hsa-mir-124a | LGI4      | 0.42  |
| hsa-mir-124a | LHX2      | 0.36  |
| hsa-mir-124a | LHX6      | 0.6   |
| hsa-mir-124a | LIN7B     | 0.46  |
| hsa-mir-124a | LINGO1    | 0.55  |
| hsa-mir-124a | LINGO2    | 0.63  |
| hsa-mir-124a | LIPE      | 0.53  |
| hsa-mir-124a | LMO7      | 0.51  |
| hsa-mir-124a | LNX1      | 0.42  |
| hsa-mir-124a | LOC196541 | 0.32  |
| hsa-mir-124a | LOC201164 | 0.42  |
| hsa-mir-124a | LOC255374 | 0.25  |
| hsa-mir-124a | LOC339524 | 0.53  |
| hsa-mir-124a | LOC388610 | 0.44  |
| hsa-mir-124a | LOC399947 | 0.6   |
| hsa-mir-124a | LOC400120 | 0.59  |
| hsa-mir-124a | LOC400451 | 0.45  |
| hsa-mir-124a | LOC493869 | -0.51 |
| hsa-mir-124a | LOC554175 | 0.62  |
| hsa-mir-124a | LOC728215 | 0.47  |
| hsa-mir-124a | LONRF2    | 0.38  |
| hsa-mir-124a | LOXL2     | -0.35 |
| hsa-mir-124a | LOXL3     | -0.41 |
| hsa-mir-124a | LPL       | -0.16 |
| hsa-mir-124a | LRFN2     | 0.7   |
| hsa-mir-124a | LRFN5     | 0.69  |
| hsa-mir-124a | LRP11     | 0.41  |
| hsa-mir-124a | LRRC3B    | 0.4   |
| hsa-mir-124a | LRRC4     | 0.47  |
| hsa-mir-124a | LRRC50    | 0.17  |
| hsa-mir-124a | LRRC62    | 0.5   |
| hsa-mir-124a | LRRC7     | 0.67  |
| hsa-mir-124a | LRRN2     | 0.17  |
| hsa-mir-124a | LRRTM1    | 0.47  |

|              |          |       |
|--------------|----------|-------|
| hsa-mir-124a | LRTM2    | 0.77  |
| hsa-mir-124a | LUZP2    | 0.29  |
| hsa-mir-124a | LY6H     | 0.6   |
| hsa-mir-124a | MACROD2  | 0.5   |
| hsa-mir-124a | MAG      | 0.51  |
| hsa-mir-124a | MAGEE1   | 0.62  |
| hsa-mir-124a | MAGEL2   | 0.45  |
| hsa-mir-124a | MAGI1    | 0.55  |
| hsa-mir-124a | MAGI3    | 0.42  |
| hsa-mir-124a | MAGIX    | 0.29  |
| hsa-mir-124a | MAL      | 0.56  |
| hsa-mir-124a | MAL2     | 0.66  |
| hsa-mir-124a | MAP2K4   | 0.65  |
| hsa-mir-124a | MAP6D1   | 0.45  |
| hsa-mir-124a | MAP7     | 0.44  |
| hsa-mir-124a | MAP7D2   | 0.69  |
| hsa-mir-124a | MAPK8IP2 | 0.65  |
| hsa-mir-124a | MAST1    | 0.63  |
| hsa-mir-124a | MAST3    | 0.61  |
| hsa-mir-124a | MBP      | 0.54  |
| hsa-mir-124a | MCCC2    | -0.37 |
| hsa-mir-124a | MCF2     | 0.55  |
| hsa-mir-124a | MCF2L2   | 0.44  |
| hsa-mir-124a | MCHR2    | 0.61  |
| hsa-mir-124a | MEF2C    | 0.5   |
| hsa-mir-124a | MEPE     | 0.5   |
| hsa-mir-124a | MFSD4    | 0.67  |
| hsa-mir-124a | MGAT3    | 0.45  |
| hsa-mir-124a | MGAT4C   | 0.45  |
| hsa-mir-124a | MGAT5B   | 0.51  |
| hsa-mir-124a | MGC10850 | 0.37  |
| hsa-mir-124a | MGC16291 | 0.3   |
| hsa-mir-124a | MGC39606 | 0.6   |
| hsa-mir-124a | MGC42090 | 0.42  |
| hsa-mir-124a | MICAL2   | 0.59  |
| hsa-mir-124a | MLF1IP   | -0.18 |
| hsa-mir-124a | MLLT11   | 0.57  |
| hsa-mir-124a | MMD      | 0.46  |
| hsa-mir-124a | MMP14    | -0.52 |
| hsa-mir-124a | MMP7     | -0.31 |
| hsa-mir-124a | MMP9     | -0.25 |
| hsa-mir-124a | MOAP1    | 0.52  |
| hsa-mir-124a | MOBP     | 0.6   |
| hsa-mir-124a | MOG      | 0.53  |
| hsa-mir-124a | MORC4    | -0.52 |
| hsa-mir-124a | MOV10    | -0.48 |
| hsa-mir-124a | MRC2     | -0.47 |
| hsa-mir-124a | MRPS17   | -0.19 |
| hsa-mir-124a | MSTN     | 0.09  |
| hsa-mir-124a | MTMR9    | 0.57  |
| hsa-mir-124a | MUM1L1   | 0.55  |
| hsa-mir-124a | MYBPC1   | 0.4   |
| hsa-mir-124a | MYBPHL   | 0.32  |

|              |         |       |
|--------------|---------|-------|
| hsa-mir-124a | MYCBP2  | 0.53  |
| hsa-mir-124a | MYO16   | 0.38  |
| hsa-mir-124a | MYOT    | 0.44  |
| hsa-mir-124a | MYRIP   | 0.49  |
| hsa-mir-124a | MYT1    | 0.39  |
| hsa-mir-124a | MYT1L   | 0.79  |
| hsa-mir-124a | NACAD   | 0.33  |
| hsa-mir-124a | NALCN   | 0.56  |
| hsa-mir-124a | NAP1L2  | 0.63  |
| hsa-mir-124a | NAP1L3  | 0.67  |
| hsa-mir-124a | NAP1L5  | 0.55  |
| hsa-mir-124a | NAPB    | 0.65  |
| hsa-mir-124a | NAV3    | 0.51  |
| hsa-mir-124a | NBEA    | 0.57  |
| hsa-mir-124a | NBL1    | 0.41  |
| hsa-mir-124a | NCALD   | 0.44  |
| hsa-mir-124a | NCAM1   | 0.43  |
| hsa-mir-124a | NCDN    | 0.6   |
| hsa-mir-124a | NCOA7   | 0.46  |
| hsa-mir-124a | NDC80   | -0.26 |
| hsa-mir-124a | NDN     | 0.38  |
| hsa-mir-124a | NDRG4   | 0.47  |
| hsa-mir-124a | NDUFA4  | 0.24  |
| hsa-mir-124a | NDUFB8  | 0.58  |
| hsa-mir-124a | NEFH    | 0.64  |
| hsa-mir-124a | NEFL    | 0.69  |
| hsa-mir-124a | NEFM    | 0.74  |
| hsa-mir-124a | NEGR1   | 0.56  |
| hsa-mir-124a | NELL1   | 0.54  |
| hsa-mir-124a | NELL2   | 0.32  |
| hsa-mir-124a | NES     | -0.42 |
| hsa-mir-124a | NETO1   | 0.63  |
| hsa-mir-124a | NEURL   | 0.74  |
| hsa-mir-124a | NEUROD1 | 0.25  |
| hsa-mir-124a | NEUROD2 | 0.75  |
| hsa-mir-124a | NEUROD6 | 0.63  |
| hsa-mir-124a | NGB     | 0.55  |
| hsa-mir-124a | NGEF    | 0.56  |
| hsa-mir-124a | NISCH   | 0.35  |
| hsa-mir-124a | NKIRAS1 | 0.51  |
| hsa-mir-124a | NKX6-2  | 0.46  |
| hsa-mir-124a | NMB     | -0.32 |
| hsa-mir-124a | NMNAT2  | 0.63  |
| hsa-mir-124a | NNAT    | 0.44  |
| hsa-mir-124a | NOL4    | 0.41  |
| hsa-mir-124a | NOS1AP  | 0.53  |
| hsa-mir-124a | NOX4    | -0.46 |
| hsa-mir-124a | NPM2    | 0.76  |
| hsa-mir-124a | NPPC    | 0.15  |
| hsa-mir-124a | NPTX1   | 0.52  |
| hsa-mir-124a | NPTX2   | 0.32  |
| hsa-mir-124a | NPTXR   | 0.52  |
| hsa-mir-124a | NPY     | 0.61  |

|              |          |       |
|--------------|----------|-------|
| hsa-mir-124a | NPY1R    | 0.49  |
| hsa-mir-124a | NPY5R    | 0.4   |
| hsa-mir-124a | NR0B1    | 0.35  |
| hsa-mir-124a | NRG3     | 0.46  |
| hsa-mir-124a | NRGN     | 0.72  |
| hsa-mir-124a | NRSN1    | 0.59  |
| hsa-mir-124a | NRXN1    | 0.56  |
| hsa-mir-124a | NRXN2    | 0.47  |
| hsa-mir-124a | NRXN3    | 0.59  |
| hsa-mir-124a | NSF      | 0.65  |
| hsa-mir-124a | NTN4     | 0.46  |
| hsa-mir-124a | NTNG2    | 0.5   |
| hsa-mir-124a | NTSR2    | 0.44  |
| hsa-mir-124a | NUAK1    | 0.55  |
| hsa-mir-124a | NUDT10   | 0.48  |
| hsa-mir-124a | NUDT11   | 0.48  |
| hsa-mir-124a | NUF2     | -0.17 |
| hsa-mir-124a | NXPH2    | 0.45  |
| hsa-mir-124a | NXT2     | -0.03 |
| hsa-mir-124a | NY-REN-7 | 0.67  |
| hsa-mir-124a | OCA2     | 0.54  |
| hsa-mir-124a | OCIAD2   | -0.19 |
| hsa-mir-124a | ODZ2     | 0.42  |
| hsa-mir-124a | OGDHL    | 0.43  |
| hsa-mir-124a | OIP5     | -0.27 |
| hsa-mir-124a | OLA1     | 0.57  |
| hsa-mir-124a | OLFM1    | 0.68  |
| hsa-mir-124a | OLFM3    | 0.65  |
| hsa-mir-124a | OLIG2    | 0.2   |
| hsa-mir-124a | OMG      | 0.46  |
| hsa-mir-124a | OPCML    | 0.64  |
| hsa-mir-124a | OPRK1    | 0.58  |
| hsa-mir-124a | OPTN     | 0.28  |
| hsa-mir-124a | OR2L13   | 0.58  |
| hsa-mir-124a | OXGR1    | 0.45  |
| hsa-mir-124a | PACSN1   | 0.79  |
| hsa-mir-124a | PAIP2B   | 0.58  |
| hsa-mir-124a | PAK3     | 0.71  |
| hsa-mir-124a | PAK7     | 0.72  |
| hsa-mir-124a | PALM     | 0.52  |
| hsa-mir-124a | PALM2    | 0.4   |
| hsa-mir-124a | PARP4    | -0.5  |
| hsa-mir-124a | PBK      | -0.2  |
| hsa-mir-124a | PCDH11Y  | 0.65  |
| hsa-mir-124a | PCDH20   | 0.36  |
| hsa-mir-124a | PCDHA3   | 0.21  |
| hsa-mir-124a | PCDHAC2  | 0.44  |
| hsa-mir-124a | PCLO     | 0.6   |
| hsa-mir-124a | PCP4     | 0.45  |
| hsa-mir-124a | PCSK1    | 0.04  |
| hsa-mir-124a | PCSK2    | 0.72  |
| hsa-mir-124a | PDE1A    | 0.51  |
| hsa-mir-124a | PDE1B    | 0.54  |

|              |          |       |
|--------------|----------|-------|
| hsa-mir-124a | PDE2A    | 0.66  |
| hsa-mir-124a | PDE8B    | 0.23  |
| hsa-mir-124a | PDIA2    | 0.52  |
| hsa-mir-124a | PDPN     | -0.47 |
| hsa-mir-124a | PDYN     | 0.69  |
| hsa-mir-124a | PEG3     | 0.54  |
| hsa-mir-124a | PELI3    | 0.47  |
| hsa-mir-124a | PENK     | 0.41  |
| hsa-mir-124a | PEX5L    | 0.61  |
| hsa-mir-124a | PFN2     | 0.52  |
| hsa-mir-124a | PGBD5    | 0.52  |
| hsa-mir-124a | PHACTR1  | 0.43  |
| hsa-mir-124a | PHACTR3  | 0.59  |
| hsa-mir-124a | PHYHIP   | 0.77  |
| hsa-mir-124a | PHYHIPL  | 0.46  |
| hsa-mir-124a | PI4KA    | 0.54  |
| hsa-mir-124a | PIK3R1   | 0.3   |
| hsa-mir-124a | PIP3-E   | 0.62  |
| hsa-mir-124a | PIP5K1B  | 0.5   |
| hsa-mir-124a | PKIA     | 0.44  |
| hsa-mir-124a | PLAU     | -0.44 |
| hsa-mir-124a | PLCB1    | 0.57  |
| hsa-mir-124a | PLCL1    | 0.51  |
| hsa-mir-124a | PLCXD3   | 0.46  |
| hsa-mir-124a | PLEKHA1  | 0.6   |
| hsa-mir-124a | PLEKHA4  | -0.46 |
| hsa-mir-124a | PLEKHA6  | 0.28  |
| hsa-mir-124a | PLEKHG5  | 0.36  |
| hsa-mir-124a | PLK2     | 0.34  |
| hsa-mir-124a | PLP1     | 0.54  |
| hsa-mir-124a | PLXNB2   | -0.31 |
| hsa-mir-124a | PNCK     | 0.64  |
| hsa-mir-124a | PNMA3    | 0.65  |
| hsa-mir-124a | PNMA5    | 0.69  |
| hsa-mir-124a | PNMT     | 0.41  |
| hsa-mir-124a | PNOC     | 0.56  |
| hsa-mir-124a | POPDC3   | 0.33  |
| hsa-mir-124a | PPAPDC1A | 0.25  |
| hsa-mir-124a | PPFIA2   | 0.5   |
| hsa-mir-124a | PPFIA4   | 0.49  |
| hsa-mir-124a | PPIC     | -0.5  |
| hsa-mir-124a | PPM1E    | 0.49  |
| hsa-mir-124a | PPM1H    | 0.63  |
| hsa-mir-124a | PPM2C    | 0.4   |
| hsa-mir-124a | PPP1R12B | 0.5   |
| hsa-mir-124a | PPP1R16B | 0.71  |
| hsa-mir-124a | PPP1R1A  | 0.52  |
| hsa-mir-124a | PPP1R9A  | 0.44  |
| hsa-mir-124a | PPP2R2C  | 0.76  |
| hsa-mir-124a | PPP3CA   | 0.52  |
| hsa-mir-124a | PPP3CB   | 0.64  |
| hsa-mir-124a | PRDM12   | 0.44  |
| hsa-mir-124a | PRDX4    | -0.48 |

|              |           |       |
|--------------|-----------|-------|
| hsa-mir-124a | PRICKLE1  | 0.23  |
| hsa-mir-124a | PRKACB    | 0.44  |
| hsa-mir-124a | PRKAR2B   | 0.47  |
| hsa-mir-124a | PRKCB1    | 0.56  |
| hsa-mir-124a | PRKCE     | 0.64  |
| hsa-mir-124a | PRMT8     | 0.66  |
| hsa-mir-124a | PRPH2     | 0.44  |
| hsa-mir-124a | PRRT2     | 0.45  |
| hsa-mir-124a | PSD       | 0.67  |
| hsa-mir-124a | PSD3      | 0.57  |
| hsa-mir-124a | PTH2R     | 0.53  |
| hsa-mir-124a | PTPDC1    | 0.3   |
| hsa-mir-124a | PTPN5     | 0.72  |
| hsa-mir-124a | PTPRD     | 0.39  |
| hsa-mir-124a | PTPRM     | 0.35  |
| hsa-mir-124a | PTPRN     | 0.54  |
| hsa-mir-124a | PTPRR     | 0.47  |
| hsa-mir-124a | PTPRT     | 0.59  |
| hsa-mir-124a | PVALB     | 0.55  |
| hsa-mir-124a | QDPR      | 0.55  |
| hsa-mir-124a | RAB11FIP4 | 0.7   |
| hsa-mir-124a | RAB13     | -0.47 |
| hsa-mir-124a | RAB15     | 0.5   |
| hsa-mir-124a | RAB27B    | 0.32  |
| hsa-mir-124a | RAB33A    | 0.58  |
| hsa-mir-124a | RAB34     | -0.38 |
| hsa-mir-124a | RAB3A     | 0.68  |
| hsa-mir-124a | RAB3C     | 0.54  |
| hsa-mir-124a | RAB40B    | 0.64  |
| hsa-mir-124a | RAB6B     | 0.54  |
| hsa-mir-124a | RAI2      | 0.51  |
| hsa-mir-124a | RALYL     | 0.53  |
| hsa-mir-124a | RAP1GAP   | 0.44  |
| hsa-mir-124a | RAPGEF2   | 0.57  |
| hsa-mir-124a | RAPGEF4   | 0.64  |
| hsa-mir-124a | RAPGEF5   | 0.54  |
| hsa-mir-124a | RASAL1    | 0.59  |
| hsa-mir-124a | RASGEF1A  | 0.49  |
| hsa-mir-124a | RASGRF1   | 0.52  |
| hsa-mir-124a | RASGRF2   | 0.52  |
| hsa-mir-124a | RASL10A   | 0.54  |
| hsa-mir-124a | RASL11B   | 0.48  |
| hsa-mir-124a | RBM11     | 0.64  |
| hsa-mir-124a | RBM24     | 0.3   |
| hsa-mir-124a | RBP1      | -0.14 |
| hsa-mir-124a | RBP7      | 0.32  |
| hsa-mir-124a | RDHE2     | 0.59  |
| hsa-mir-124a | REEP1     | 0.61  |
| hsa-mir-124a | RELN      | 0.46  |
| hsa-mir-124a | REPS2     | 0.61  |
| hsa-mir-124a | RERG      | 0.33  |
| hsa-mir-124a | RFPL1     | 0.66  |
| hsa-mir-124a | RFPL2     | 0.66  |

|              |              |       |
|--------------|--------------|-------|
| hsa-mir-124a | RFPL3        | 0.63  |
| hsa-mir-124a | RGS4         | 0.46  |
| hsa-mir-124a | RGS7         | 0.63  |
| hsa-mir-124a | RGS7BP       | 0.48  |
| hsa-mir-124a | RHOBTB2      | 0.49  |
| hsa-mir-124a | RHOBTB3      | 0.03  |
| hsa-mir-124a | RIC3         | 0.35  |
| hsa-mir-124a | RICH2        | 0.77  |
| hsa-mir-124a | RICS         | 0.42  |
| hsa-mir-124a | RIMBP2       | 0.71  |
| hsa-mir-124a | RIMS1        | 0.58  |
| hsa-mir-124a | RIMS2        | 0.73  |
| hsa-mir-124a | RIMS3        | 0.72  |
| hsa-mir-124a | RLBP1L1      | 0.36  |
| hsa-mir-124a | RLBP1L2      | 0.42  |
| hsa-mir-124a | RND2         | -0.06 |
| hsa-mir-124a | RNF11        | 0.34  |
| hsa-mir-124a | RNF150       | 0.43  |
| hsa-mir-124a | RNF165       | 0.54  |
| hsa-mir-124a | RNF182       | 0.29  |
| hsa-mir-124a | RNF41        | 0.57  |
| hsa-mir-124a | RP11-35N6.1  | 0.52  |
| hsa-mir-124a | RP11-679B17. | 0.56  |
| hsa-mir-124a | RPE65        | -0.02 |
| hsa-mir-124a | RPH3A        | 0.31  |
| hsa-mir-124a | RPRM         | 0.4   |
| hsa-mir-124a | RPRML        | 0.61  |
| hsa-mir-124a | RPS6KA5      | 0.58  |
| hsa-mir-124a | RSPO2        | 0.52  |
| hsa-mir-124a | RSPO3        | 0.54  |
| hsa-mir-124a | RTN1         | 0.48  |
| hsa-mir-124a | RTN2         | 0.55  |
| hsa-mir-124a | RTN4         | 0.49  |
| hsa-mir-124a | RTN4R        | 0.57  |
| hsa-mir-124a | RTN4RL1      | 0.64  |
| hsa-mir-124a | RTP1         | 0.48  |
| hsa-mir-124a | RUFY2        | 0.59  |
| hsa-mir-124a | RUNDC3A      | 0.75  |
| hsa-mir-124a | RUNDC3B      | 0.51  |
| hsa-mir-124a | RUNX1        | -0.42 |
| hsa-mir-124a | RXFP1        | 0.49  |
| hsa-mir-124a | RYR2         | 0.72  |
| hsa-mir-124a | S100A1       | 0.51  |
| hsa-mir-124a | S100G        | -0.04 |
| hsa-mir-124a | SAMD12       | 0.61  |
| hsa-mir-124a | SAMD9L       | -0.44 |
| hsa-mir-124a | SATB1        | 0.51  |
| hsa-mir-124a | SBNO2        | -0.36 |
| hsa-mir-124a | SCAMP5       | 0.64  |
| hsa-mir-124a | SCG3         | 0.45  |
| hsa-mir-124a | SCG5         | 0.26  |
| hsa-mir-124a | SCGN         | 0.27  |
| hsa-mir-124a | SCN2A        | 0.67  |

|              |          |       |
|--------------|----------|-------|
| hsa-mir-124a | SCN2B    | 0.54  |
| hsa-mir-124a | SCN3B    | 0.57  |
| hsa-mir-124a | SCN8A    | 0.5   |
| hsa-mir-124a | SCN9A    | 0.35  |
| hsa-mir-124a | SEC14L5  | 0.63  |
| hsa-mir-124a | SEMA3C   | 0.1   |
| hsa-mir-124a | SEMA4F   | 0.35  |
| hsa-mir-124a | SERPINA3 | -0.21 |
| hsa-mir-124a | SERPINI1 | 0.61  |
| hsa-mir-124a | SFRP4    | -0.39 |
| hsa-mir-124a | SGCE     | -0.08 |
| hsa-mir-124a | SGIP1    | 0.57  |
| hsa-mir-124a | SGSM1    | 0.66  |
| hsa-mir-124a | SH2D5    | 0.59  |
| hsa-mir-124a | SH3BGRL2 | 0.63  |
| hsa-mir-124a | SH3GL2   | 0.71  |
| hsa-mir-124a | SH3GL3   | 0.73  |
| hsa-mir-124a | SHANK2   | 0.71  |
| hsa-mir-124a | SHANK3   | 0.53  |
| hsa-mir-124a | SIDT1    | 0.38  |
| hsa-mir-124a | SIVA1    | -0.17 |
| hsa-mir-124a | SKIP     | 0.61  |
| hsa-mir-124a | SLAIN1   | 0.41  |
| hsa-mir-124a | SLC12A5  | 0.81  |
| hsa-mir-124a | SLC13A5  | 0.25  |
| hsa-mir-124a | SLC16A14 | 0.43  |
| hsa-mir-124a | SLC16A8  | 0.37  |
| hsa-mir-124a | SLC17A6  | 0.66  |
| hsa-mir-124a | SLC17A7  | 0.67  |
| hsa-mir-124a | SLC17A8  | 0.32  |
| hsa-mir-124a | SLC1A4   | 0.38  |
| hsa-mir-124a | SLC1A6   | 0.5   |
| hsa-mir-124a | SLC25A27 | 0.56  |
| hsa-mir-124a | SLC2A13  | 0.48  |
| hsa-mir-124a | SLC30A3  | 0.69  |
| hsa-mir-124a | SLC32A1  | 0.75  |
| hsa-mir-124a | SLC35F3  | 0.75  |
| hsa-mir-124a | SLC37A2  | -0.22 |
| hsa-mir-124a | SLC38A1  | 0.39  |
| hsa-mir-124a | SLC39A12 | 0.42  |
| hsa-mir-124a | SLC45A4  | 0.31  |
| hsa-mir-124a | SLC4A10  | 0.58  |
| hsa-mir-124a | SLC5A11  | 0.48  |
| hsa-mir-124a | SLC7A10  | 0.44  |
| hsa-mir-124a | SLC7A14  | 0.56  |
| hsa-mir-124a | SLC8A2   | 0.61  |
| hsa-mir-124a | SLC8A3   | 0.55  |
| hsa-mir-124a | SLCO1A2  | 0.43  |
| hsa-mir-124a | SLIT1    | 0.38  |
| hsa-mir-124a | SLIT3    | 0.29  |
| hsa-mir-124a | SLITRK1  | 0.63  |
| hsa-mir-124a | SLITRK4  | 0.69  |
| hsa-mir-124a | SLITRK5  | 0.39  |



|              |            |       |
|--------------|------------|-------|
| hsa-mir-124a | SMOC1      | 0.32  |
| hsa-mir-124a | SMPX       | 0.67  |
| hsa-mir-124a | SNAP25     | 0.75  |
| hsa-mir-124a | SNAP91     | 0.76  |
| hsa-mir-124a | SNCA       | 0.63  |
| hsa-mir-124a | SNCB       | 0.73  |
| hsa-mir-124a | SNCG       | 0.61  |
| hsa-mir-124a | SNIP       | 0.76  |
| hsa-mir-124a | SNN        | 0.39  |
| hsa-mir-124a | SNTG2      | 0.36  |
| hsa-mir-124a | SOHLH1     | 0.75  |
| hsa-mir-124a | SORBS2     | 0.47  |
| hsa-mir-124a | SORCS1     | 0.45  |
| hsa-mir-124a | SORCS2     | 0.27  |
| hsa-mir-124a | SORCS3     | 0.44  |
| hsa-mir-124a | SOSTDC1    | 0.31  |
| hsa-mir-124a | SPC25      | -0.22 |
| hsa-mir-124a | SPG3A      | 0.67  |
| hsa-mir-124a | SPINK2     | 0.1   |
| hsa-mir-124a | SPOCK1     | 0.47  |
| hsa-mir-124a | SPOCK3     | 0.66  |
| hsa-mir-124a | SRPX       | -0.46 |
| hsa-mir-124a | SST        | 0.68  |
| hsa-mir-124a | SSTR1      | 0.66  |
| hsa-mir-124a | SSTR2      | 0.65  |
| hsa-mir-124a | ST18       | 0.54  |
| hsa-mir-124a | ST6GAL2    | 0.39  |
| hsa-mir-124a | ST6GALNAC5 | 0.29  |
| hsa-mir-124a | ST8SIA3    | 0.67  |
| hsa-mir-124a | STAR       | 0.49  |
| hsa-mir-124a | STK17B     | -0.34 |
| hsa-mir-124a | STK32A     | -0.28 |
| hsa-mir-124a | STK32C     | 0.45  |
| hsa-mir-124a | STMN2      | 0.62  |
| hsa-mir-124a | STMN4      | 0.54  |
| hsa-mir-124a | STOX1      | 0.41  |
| hsa-mir-124a | STOX2      | 0.55  |
| hsa-mir-124a | STX1A      | 0.6   |
| hsa-mir-124a | STX1B      | 0.52  |
| hsa-mir-124a | STXBP1     | 0.72  |
| hsa-mir-124a | STXBP5L    | 0.64  |
| hsa-mir-124a | STXBP6     | 0.58  |
| hsa-mir-124a | STYK1      | 0.67  |
| hsa-mir-124a | SUGT1L1    | 0.47  |
| hsa-mir-124a | SULT4A1    | 0.71  |
| hsa-mir-124a | SUSD5      | 0.42  |
| hsa-mir-124a | SV2B       | 0.71  |
| hsa-mir-124a | SV2C       | 0.64  |
| hsa-mir-124a | SYCE1      | 0.56  |
| hsa-mir-124a | SYN2       | 0.69  |
| hsa-mir-124a | SYN3       | 0.54  |
| hsa-mir-124a | SYNE1      | 0.52  |
| hsa-mir-124a | SYNGR1     | 0.57  |

|              |          |       |
|--------------|----------|-------|
| hsa-mir-124a | SYNPR    | 0.77  |
| hsa-mir-124a | SYP      | 0.67  |
| hsa-mir-124a | SYT1     | 0.72  |
| hsa-mir-124a | SYT13    | 0.84  |
| hsa-mir-124a | SYT4     | 0.7   |
| hsa-mir-124a | SYT5     | 0.65  |
| hsa-mir-124a | TAC1     | 0.6   |
| hsa-mir-124a | TAC3     | 0.6   |
| hsa-mir-124a | TAF3     | 0.28  |
| hsa-mir-124a | TAGLN3   | 0.62  |
| hsa-mir-124a | TARSL2   | 0.39  |
| hsa-mir-124a | TASP1    | 0     |
| hsa-mir-124a | TBC1D9   | 0.41  |
| hsa-mir-124a | TBR1     | 0.61  |
| hsa-mir-124a | TCBA1    | 0.65  |
| hsa-mir-124a | TCEAL2   | 0.46  |
| hsa-mir-124a | TCERG1L  | 0.67  |
| hsa-mir-124a | TDRD9    | 0.48  |
| hsa-mir-124a | TEF      | 0.46  |
| hsa-mir-124a | TERF2IP  | 0.49  |
| hsa-mir-124a | TESC     | 0.32  |
| hsa-mir-124a | TF       | 0.52  |
| hsa-mir-124a | TGIF1    | -0.48 |
| hsa-mir-124a | THG1L    | -0.38 |
| hsa-mir-124a | TIAM2    | 0.39  |
| hsa-mir-124a | TIMP4    | -0.15 |
| hsa-mir-124a | TMCC2    | 0.62  |
| hsa-mir-124a | TMEFF1   | 0.59  |
| hsa-mir-124a | TMEFF2   | 0.6   |
| hsa-mir-124a | TMEM10   | 0.68  |
| hsa-mir-124a | TMEM125  | 0.56  |
| hsa-mir-124a | TMEM130  | 0.69  |
| hsa-mir-124a | TMEM132B | 0.38  |
| hsa-mir-124a | TMEM144  | 0.45  |
| hsa-mir-124a | TMEM151  | 0.56  |
| hsa-mir-124a | TMEM155  | 0.65  |
| hsa-mir-124a | TMEM16C  | 0.73  |
| hsa-mir-124a | TMEM16D  | 0.56  |
| hsa-mir-124a | TMEM24   | 0.56  |
| hsa-mir-124a | TMEM35   | 0.58  |
| hsa-mir-124a | TMEM59L  | 0.42  |
| hsa-mir-124a | TMSL8    | 0.12  |
| hsa-mir-124a | TNNT2    | 0.57  |
| hsa-mir-124a | TNRC4    | 0.77  |
| hsa-mir-124a | TOP2A    | -0.13 |
| hsa-mir-124a | TPD52L1  | 0.41  |
| hsa-mir-124a | TPPP     | 0.61  |
| hsa-mir-124a | TRHDE    | 0.47  |
| hsa-mir-124a | TRIM2    | 0.5   |
| hsa-mir-124a | TRIP10   | -0.45 |
| hsa-mir-124a | TSPAN6   | -0.34 |
| hsa-mir-124a | TSPAN7   | 0.46  |
| hsa-mir-124a | TSPYL1   | 0.53  |

|              |         |       |
|--------------|---------|-------|
| hsa-mir-124a | TSPYL2  | 0.52  |
| hsa-mir-124a | TSPYL4  | 0.6   |
| hsa-mir-124a | TSPYL5  | 0.41  |
| hsa-mir-124a | TTC9    | 0.48  |
| hsa-mir-124a | TTC9B   | 0.72  |
| hsa-mir-124a | TTK     | -0.16 |
| hsa-mir-124a | TUB     | 0.49  |
| hsa-mir-124a | TUBA4A  | 0.47  |
| hsa-mir-124a | TUBA8   | 0.71  |
| hsa-mir-124a | UBD     | -0.18 |
| hsa-mir-124a | UCHL1   | 0.45  |
| hsa-mir-124a | UGCGL2  | -0.21 |
| hsa-mir-124a | UGT8    | 0.52  |
| hsa-mir-124a | ULK2    | 0.53  |
| hsa-mir-124a | UNC13A  | 0.58  |
| hsa-mir-124a | UNC13C  | 0.63  |
| hsa-mir-124a | UNC5D   | 0.37  |
| hsa-mir-124a | USP43   | 0.52  |
| hsa-mir-124a | USP46   | 0.38  |
| hsa-mir-124a | VAMP2   | 0.54  |
| hsa-mir-124a | VCAN    | -0.21 |
| hsa-mir-124a | VGFB    | 0.42  |
| hsa-mir-124a | VIM     | -0.49 |
| hsa-mir-124a | VIP     | 0.68  |
| hsa-mir-124a | VIPR2   | 0.28  |
| hsa-mir-124a | VIT     | 0.23  |
| hsa-mir-124a | VSNL1   | 0.67  |
| hsa-mir-124a | VSTM2A  | 0.31  |
| hsa-mir-124a | VSTM2L  | 0.64  |
| hsa-mir-124a | VWC2    | 0.3   |
| hsa-mir-124a | WASF1   | 0.65  |
| hsa-mir-124a | WBSCR17 | 0.48  |
| hsa-mir-124a | WDR47   | 0.6   |
| hsa-mir-124a | WDR7    | 0.58  |
| hsa-mir-124a | WFDC1   | 0.43  |
| hsa-mir-124a | WIF1    | 0.58  |
| hsa-mir-124a | WNT10B  | 0.65  |
| hsa-mir-124a | WSCD2   | 0.68  |
| hsa-mir-124a | XK      | 0.49  |
| hsa-mir-124a | XKR4    | 0.54  |
| hsa-mir-124a | YPEL4   | 0.55  |
| hsa-mir-124a | YWHAH   | 0.53  |
| hsa-mir-124a | ZBTB7A  | 0.11  |
| hsa-mir-124a | ZCCHC12 | 0.65  |
| hsa-mir-124a | ZDHHC11 | 0.38  |
| hsa-mir-124a | ZDHHC22 | 0.54  |
| hsa-mir-124a | ZFP36L2 | -0.41 |
| hsa-mir-124a | ZMAT4   | 0.38  |
| hsa-mir-124a | ZNF179  | 0.43  |
| hsa-mir-124a | ZNF217  | -0.49 |
| hsa-mir-124a | ZNF233  | 0.36  |
| hsa-mir-124a | ZNF25   | 0.52  |
| hsa-mir-124a | ZNF365  | 0.59  |

|              |           |       |
|--------------|-----------|-------|
| hsa-mir-124a | ZNF497    | 0.16  |
| hsa-mir-124a | ZNF533    | 0.48  |
| hsa-mir-124a | ZNF536    | 0.59  |
| hsa-mir-124a | ZNF540    | 0.59  |
| hsa-mir-124a | ZYG11B    | 0.42  |
| hsa-mir-125a | ALDH1L1   | 0.32  |
| hsa-mir-125a | CAMK2B    | 0.33  |
| hsa-mir-125a | EMX2      | 0.3   |
| hsa-mir-125a | HSPB3     | -0.05 |
| hsa-mir-125a | IQUB      | 0.33  |
| hsa-mir-125a | KCNN2     | 0.41  |
| hsa-mir-125a | KIAA0828  | 0.39  |
| hsa-mir-125a | LOC147650 | 0.29  |
| hsa-mir-125a | MYO5C     | 0.32  |
| hsa-mir-125a | NR0B1     | -0.27 |
| hsa-mir-125a | OSBPL6    | 0.39  |
| hsa-mir-125a | PCDH9     | 0.33  |
| hsa-mir-125a | PPARGC1A  | 0.41  |
| hsa-mir-125a | PTCHD1    | 0.35  |
| hsa-mir-125a | RAGE      | 0.27  |
| hsa-mir-125a | RGMA      | 0.33  |
| hsa-mir-125a | RYR3      | 0.33  |
| hsa-mir-125a | SLC14A1   | 0.25  |
| hsa-mir-125a | SLC1A2    | 0.38  |
| hsa-mir-125a | SLC4A4    | 0.33  |
| hsa-mir-125a | TMEM166   | -0.3  |
| hsa-mir-125a | TMSL8     | -0.25 |
| hsa-mir-125a | ZNF671    | 0.32  |
| hsa-mir-125b | ABAT      | 0.45  |
| hsa-mir-125b | ADCY8     | 0.34  |
| hsa-mir-125b | AHCYL1    | 0.4   |
| hsa-mir-125b | APC       | 0.37  |
| hsa-mir-125b | ARHGEF10L | 0.44  |
| hsa-mir-125b | ARHGEF4   | 0.41  |
| hsa-mir-125b | ASCL1     | 0.45  |
| hsa-mir-125b | BNC2      | -0.28 |
| hsa-mir-125b | CDH20     | 0.3   |
| hsa-mir-125b | CHST9     | 0.44  |
| hsa-mir-125b | CLDN23    | -0.3  |
| hsa-mir-125b | CMTM7     | -0.4  |
| hsa-mir-125b | CRB1      | 0.44  |
| hsa-mir-125b | CTNND2    | 0.47  |
| hsa-mir-125b | DCN       | -0.31 |
| hsa-mir-125b | DKK1      | -0.3  |
| hsa-mir-125b | DLL1      | 0.37  |
| hsa-mir-125b | ERBB4     | 0.41  |
| hsa-mir-125b | FADS2     | 0.33  |
| hsa-mir-125b | FGFBP3    | 0.33  |
| hsa-mir-125b | FGFR3     | 0.37  |
| hsa-mir-125b | FMN2      | 0.46  |
| hsa-mir-125b | FRY       | 0.36  |
| hsa-mir-125b | GCSH      | 0.34  |
| hsa-mir-125b | GNG11     | -0.26 |

|              |           |       |
|--------------|-----------|-------|
| hsa-mir-125b | GPR56     | 0.38  |
| hsa-mir-125b | GPT2      | 0.49  |
| hsa-mir-125b | HEPACAM   | 0.42  |
| hsa-mir-125b | HES5      | 0.35  |
| hsa-mir-125b | HIP1R     | 0.3   |
| hsa-mir-125b | IL17D     | 0.45  |
| hsa-mir-125b | KIF1B     | 0.41  |
| hsa-mir-125b | LIFR      | 0.36  |
| hsa-mir-125b | LOC129881 | 0.44  |
| hsa-mir-125b | LOC285382 | 0.41  |
| hsa-mir-125b | LOC57228  | -0.35 |
| hsa-mir-125b | LRRC49    | 0.3   |
| hsa-mir-125b | LUM       | -0.39 |
| hsa-mir-125b | LY96      | -0.35 |
| hsa-mir-125b | LYL1      | -0.33 |
| hsa-mir-125b | MAPT      | 0.39  |
| hsa-mir-125b | MATN2     | 0.33  |
| hsa-mir-125b | MGC10814  | 0.25  |
| hsa-mir-125b | MOSC1     | 0.37  |
| hsa-mir-125b | NDRG2     | 0.35  |
| hsa-mir-125b | NFIA      | 0.46  |
| hsa-mir-125b | NRP1      | -0.39 |
| hsa-mir-125b | PPARGC1A  | 0.35  |
| hsa-mir-125b | PROCR     | -0.33 |
| hsa-mir-125b | PRODH     | 0.33  |
| hsa-mir-125b | PSAT1     | 0.38  |
| hsa-mir-125b | PSD2      | 0.42  |
| hsa-mir-125b | RFTN2     | 0.41  |
| hsa-mir-125b | RIC3      | 0.36  |
| hsa-mir-125b | ROBO2     | 0.37  |
| hsa-mir-125b | SALL2     | 0.43  |
| hsa-mir-125b | SALL3     | 0.4   |
| hsa-mir-125b | SAMSN1    | -0.25 |
| hsa-mir-125b | SCG3      | 0.29  |
| hsa-mir-125b | SERPINB1  | -0.31 |
| hsa-mir-125b | SHC2      | 0.4   |
| hsa-mir-125b | SLC16A9   | 0.4   |
| hsa-mir-125b | TFPI2     | -0.23 |
| hsa-mir-125b | TIMP1     | -0.31 |
| hsa-mir-125b | TMEM166   | -0.38 |
| hsa-mir-125b | TMPRSS5   | 0.31  |
| hsa-mir-125b | TNFSF4    | -0.24 |
| hsa-mir-125b | TSPAN3    | 0.39  |
| hsa-mir-125b | TTYH2     | 0.24  |
| hsa-mir-125b | VPS13D    | 0.27  |
| hsa-mir-125b | WASF3     | 0.34  |
| hsa-mir-125b | ZNF521    | 0.33  |
| hsa-mir-125b | ZNF711    | 0.33  |
| hsa-mir-126  | ABCB1     | 0.43  |
| hsa-mir-126  | AFAP1L1   | 0.36  |
| hsa-mir-126  | BCL6B     | 0.46  |
| hsa-mir-126  | C16orf30  | 0.51  |
| hsa-mir-126  | C1orf64   | 0.37  |

|              |          |       |
|--------------|----------|-------|
| hsa-mir-126  | C20orf54 | 0.32  |
| hsa-mir-126  | C6orf189 | 0.4   |
| hsa-mir-126  | CD34     | 0.27  |
| hsa-mir-126  | CD58     | -0.02 |
| hsa-mir-126  | CETP     | 0.38  |
| hsa-mir-126  | COL4A2   | 0.33  |
| hsa-mir-126  | CTHRC1   | 0.08  |
| hsa-mir-126  | CYYR1    | 0.48  |
| hsa-mir-126  | DPEP1    | 0.46  |
| hsa-mir-126  | ENPEP    | 0.36  |
| hsa-mir-126  | EPAS1    | 0.3   |
| hsa-mir-126  | FAM124B  | 0.33  |
| hsa-mir-126  | FLJ39822 | 0.35  |
| hsa-mir-126  | FOXC1    | 0.31  |
| hsa-mir-126  | FOXF1    | 0.22  |
| hsa-mir-126  | FOXF2    | 0.41  |
| hsa-mir-126  | GALNTL4  | 0.3   |
| hsa-mir-126  | GPER     | 0.3   |
| hsa-mir-126  | GPR116   | 0.35  |
| hsa-mir-126  | GPR56    | 0.3   |
| hsa-mir-126  | HEYL     | 0.29  |
| hsa-mir-126  | HSPA1A   | 0.13  |
| hsa-mir-126  | ITGA1    | 0.36  |
| hsa-mir-126  | LAMC3    | 0.44  |
| hsa-mir-126  | LASP1    | 0.16  |
| hsa-mir-126  | LGI1     | 0.14  |
| hsa-mir-126  | LRRC32   | 0.3   |
| hsa-mir-126  | LRRC36   | 0.35  |
| hsa-mir-126  | LXN      | 0.41  |
| hsa-mir-126  | MMP25    | 0.45  |
| hsa-mir-126  | MMP28    | 0.28  |
| hsa-mir-126  | MYO1B    | 0.29  |
| hsa-mir-126  | NOX4     | 0.3   |
| hsa-mir-126  | PAPSS2   | 0.32  |
| hsa-mir-126  | PTP4A3   | 0.21  |
| hsa-mir-126  | RGS5     | 0.52  |
| hsa-mir-126  | ROBO4    | 0.36  |
| hsa-mir-126  | SPON2    | 0.12  |
| hsa-mir-126  | TMEM16B  | 0.28  |
| hsa-mir-126  | TNFRSF21 | 0.27  |
| hsa-mir-126  | TRPC4    | 0.25  |
| hsa-mir-126  | TUSC3    | 0.02  |
| hsa-mir-126  | VWF      | 0.41  |
| hsa-mir-126* | BCL6B    | 0.35  |
| hsa-mir-126* | C16orf30 | 0.34  |
| hsa-mir-126* | DAPL1    | -0.09 |
| hsa-mir-126* | DPEP1    | 0.34  |
| hsa-mir-126* | EVI1     | 0.28  |
| hsa-mir-126* | TMEM45B  | 0.3   |
| hsa-mir-126* | ZNF790   | 0.14  |
| hsa-mir-127  | March11  | 0.44  |
| hsa-mir-127  | AHSA1    | 0.37  |
| hsa-mir-127  | AK5      | 0.33  |

|              |          |       |
|--------------|----------|-------|
| hsa-mir-127  | ATOH8    | 0.06  |
| hsa-mir-127  | BEGAIN   | 0.44  |
| hsa-mir-127  | C15orf26 | -0.05 |
| hsa-mir-127  | C9orf125 | 0.35  |
| hsa-mir-127  | CCK      | 0.2   |
| hsa-mir-127  | CDH1     | 0.2   |
| hsa-mir-127  | CDH18    | 0.32  |
| hsa-mir-127  | CRH      | 0.16  |
| hsa-mir-127  | DLX5     | 0.05  |
| hsa-mir-127  | FRAS1    | 0.32  |
| hsa-mir-127  | GABRA5   | 0.37  |
| hsa-mir-127  | GPR65    | -0.25 |
| hsa-mir-127  | HOOK1    | 0.42  |
| hsa-mir-127  | KCNK1    | 0.32  |
| hsa-mir-127  | KIAA1086 | 0.48  |
| hsa-mir-127  | KLK7     | 0.41  |
| hsa-mir-127  | LOC91461 | 0.31  |
| hsa-mir-127  | LRIG3    | -0.19 |
| hsa-mir-127  | MAL2     | 0.33  |
| hsa-mir-127  | MEG3     | 0.65  |
| hsa-mir-127  | NEFM     | 0.35  |
| hsa-mir-127  | NEURL    | 0.43  |
| hsa-mir-127  | NGEF     | 0.4   |
| hsa-mir-127  | NPTX1    | 0.36  |
| hsa-mir-127  | ODZ2     | 0.28  |
| hsa-mir-127  | PACSN1   | 0.36  |
| hsa-mir-127  | PAQR9    | 0.27  |
| hsa-mir-127  | PPP1R14C | 0.28  |
| hsa-mir-127  | PPP2R2C  | 0.36  |
| hsa-mir-127  | PTPRR    | 0.31  |
| hsa-mir-127  | RTN4RL1  | 0.37  |
| hsa-mir-127  | RYR2     | 0.41  |
| hsa-mir-127  | SHROOM1  | 0.13  |
| hsa-mir-127  | SULT4A1  | 0.45  |
| hsa-mir-127  | SYT13    | 0.35  |
| hsa-mir-127  | TCERG1L  | 0.41  |
| hsa-mir-127  | UNC13C   | 0.36  |
| hsa-mir-127  | VSNL1    | 0.31  |
| hsa-mir-127  | ZMAT4    | 0.4   |
| hsa-mir-128a | March11  | 0.6   |
| hsa-mir-128a | Sept5    | 0.57  |
| hsa-mir-128a | A2BP1    | 0.69  |
| hsa-mir-128a | ABHD6    | 0.51  |
| hsa-mir-128a | ABLIM2   | 0.64  |
| hsa-mir-128a | ACCN1    | 0.63  |
| hsa-mir-128a | ACTL6B   | 0.56  |
| hsa-mir-128a | ADAM12   | -0.58 |
| hsa-mir-128a | ADARB2   | 0.59  |
| hsa-mir-128a | AK5      | 0.65  |
| hsa-mir-128a | ALDOC    | 0.51  |
| hsa-mir-128a | ANK3     | 0.53  |
| hsa-mir-128a | ANKRD43  | 0.57  |
| hsa-mir-128a | ANXA2    | -0.63 |

|              |          |       |
|--------------|----------|-------|
| hsa-mir-128a | ARHGDIG  | 0.74  |
| hsa-mir-128a | ARHGEF7  | 0.66  |
| hsa-mir-128a | ARMET    | -0.5  |
| hsa-mir-128a | ARPP-21  | 0.8   |
| hsa-mir-128a | ATOH7    | 0.6   |
| hsa-mir-128a | ATP2B3   | 0.68  |
| hsa-mir-128a | ATP6V0A1 | 0.61  |
| hsa-mir-128a | ATP6V1G2 | 0.69  |
| hsa-mir-128a | ATRNL1   | 0.54  |
| hsa-mir-128a | B3GALT2  | 0.59  |
| hsa-mir-128a | BACE2    | -0.5  |
| hsa-mir-128a | BEX2     | 0.6   |
| hsa-mir-128a | BEX5     | 0.59  |
| hsa-mir-128a | BRSK2    | 0.64  |
| hsa-mir-128a | BRUNOL4  | 0.69  |
| hsa-mir-128a | BRUNOL5  | 0.69  |
| hsa-mir-128a | BSN      | 0.72  |
| hsa-mir-128a | BZRAP1   | 0.6   |
| hsa-mir-128a | C10orf38 | 0.59  |
| hsa-mir-128a | C13orf16 | 0.6   |
| hsa-mir-128a | C1orf115 | 0.62  |
| hsa-mir-128a | C1QTNF4  | 0.68  |
| hsa-mir-128a | C7orf41  | 0.61  |
| hsa-mir-128a | C9orf125 | 0.55  |
| hsa-mir-128a | CA10     | 0.53  |
| hsa-mir-128a | CA4      | 0.41  |
| hsa-mir-128a | CABP1    | 0.73  |
| hsa-mir-128a | CACNA2D3 | 0.47  |
| hsa-mir-128a | CACNB1   | 0.67  |
| hsa-mir-128a | CACNG2   | 0.61  |
| hsa-mir-128a | CACNG3   | 0.7   |
| hsa-mir-128a | CAMK1G   | 0.61  |
| hsa-mir-128a | CAMK2G   | 0.62  |
| hsa-mir-128a | CAMKV    | 0.68  |
| hsa-mir-128a | CAMTA1   | 0.57  |
| hsa-mir-128a | CARTPT   | 0.55  |
| hsa-mir-128a | CASP3    | -0.51 |
| hsa-mir-128a | CBFA2T3  | 0.6   |
| hsa-mir-128a | CBLN2    | 0.69  |
| hsa-mir-128a | CCDC109B | -0.59 |
| hsa-mir-128a | CCDC85A  | 0.65  |
| hsa-mir-128a | CCK      | 0.61  |
| hsa-mir-128a | CCKBR    | 0.69  |
| hsa-mir-128a | CD200    | 0.6   |
| hsa-mir-128a | CDH18    | 0.7   |
| hsa-mir-128a | CDH22    | 0.58  |
| hsa-mir-128a | CDH8     | 0.68  |
| hsa-mir-128a | CDH9     | 0.66  |
| hsa-mir-128a | CDR1     | 0.57  |
| hsa-mir-128a | CENTG1   | 0.51  |
| hsa-mir-128a | CHD5     | 0.67  |
| hsa-mir-128a | CHGA     | 0.62  |
| hsa-mir-128a | CHGB     | 0.56  |



|              |         |       |
|--------------|---------|-------|
| hsa-mir-128a | CKMT1A  | 0.7   |
| hsa-mir-128a | CLTB    | 0.68  |
| hsa-mir-128a | CMTM4   | 0.53  |
| hsa-mir-128a | CNKSR2  | 0.73  |
| hsa-mir-128a | CNTN3   | 0.68  |
| hsa-mir-128a | CNTN4   | 0.64  |
| hsa-mir-128a | CNTNAP2 | 0.58  |
| hsa-mir-128a | COL3A1  | -0.52 |
| hsa-mir-128a | COL5A2  | -0.55 |
| hsa-mir-128a | CORO6   | 0.55  |
| hsa-mir-128a | CPEB3   | 0.71  |
| hsa-mir-128a | CPLX1   | 0.69  |
| hsa-mir-128a | CPLX2   | 0.7   |
| hsa-mir-128a | CPNE6   | 0.59  |
| hsa-mir-128a | CREG2   | 0.64  |
| hsa-mir-128a | CRHBP   | 0.62  |
| hsa-mir-128a | CRTAC1  | 0.63  |
| hsa-mir-128a | CRYM    | 0.62  |
| hsa-mir-128a | CSMD3   | 0.63  |
| hsa-mir-128a | CTXN3   | 0.59  |
| hsa-mir-128a | CUTL2   | 0.65  |
| hsa-mir-128a | CYFIP2  | 0.67  |
| hsa-mir-128a | CYP4X1  | 0.68  |
| hsa-mir-128a | DACH2   | 0.72  |
| hsa-mir-128a | DACT3   | 0.66  |
| hsa-mir-128a | DDN     | 0.64  |
| hsa-mir-128a | DLG2    | 0.65  |
| hsa-mir-128a | DLGAP2  | 0.65  |
| hsa-mir-128a | DNAJC6  | 0.63  |
| hsa-mir-128a | DNM1    | 0.67  |
| hsa-mir-128a | DOC2A   | 0.69  |
| hsa-mir-128a | DOCK3   | 0.59  |
| hsa-mir-128a | DOK6    | 0.63  |
| hsa-mir-128a | DOPEY1  | 0.51  |
| hsa-mir-128a | DRD1IP  | 0.71  |
| hsa-mir-128a | DUSP26  | 0.59  |
| hsa-mir-128a | DUSP8   | 0.62  |
| hsa-mir-128a | EFCBP2  | 0.66  |
| hsa-mir-128a | EFHA2   | 0.73  |
| hsa-mir-128a | EHD3    | 0.62  |
| hsa-mir-128a | EIF4A2  | 0.53  |
| hsa-mir-128a | EIF4E2  | -0.59 |
| hsa-mir-128a | EPB41L1 | 0.58  |
| hsa-mir-128a | EPHB6   | 0.6   |
| hsa-mir-128a | ERC2    | 0.69  |
| hsa-mir-128a | EVL     | 0.61  |
| hsa-mir-128a | EXTL1   | 0.63  |
| hsa-mir-128a | FAM133A | 0.5   |
| hsa-mir-128a | FAM19A1 | 0.62  |
| hsa-mir-128a | FAM19A2 | 0.7   |
| hsa-mir-128a | FAM46A  | -0.52 |
| hsa-mir-128a | FAM57B  | 0.63  |
| hsa-mir-128a | FBXL15  | 0.58  |

|              |          |       |
|--------------|----------|-------|
| hsa-mir-128a | FBXL16   | 0.74  |
| hsa-mir-128a | FBXO2    | 0.53  |
| hsa-mir-128a | FBXO40   | 0.58  |
| hsa-mir-128a | FBXO41   | 0.65  |
| hsa-mir-128a | FBXW7    | 0.65  |
| hsa-mir-128a | FGF12    | 0.6   |
| hsa-mir-128a | FGF13    | 0.6   |
| hsa-mir-128a | FLJ40142 | 0.55  |
| hsa-mir-128a | FLRT1    | 0.57  |
| hsa-mir-128a | FN1      | -0.48 |
| hsa-mir-128a | FNDC3B   | -0.58 |
| hsa-mir-128a | FRMPD4   | 0.66  |
| hsa-mir-128a | FRY      | 0.6   |
| hsa-mir-128a | FSTL5    | 0.64  |
| hsa-mir-128a | GABBR1   | 0.62  |
| hsa-mir-128a | GABRA1   | 0.66  |
| hsa-mir-128a | GABRA4   | 0.59  |
| hsa-mir-128a | GABRA5   | 0.65  |
| hsa-mir-128a | GABRG1   | 0.64  |
| hsa-mir-128a | GABRG2   | 0.71  |
| hsa-mir-128a | GAD2     | 0.57  |
| hsa-mir-128a | GALNT9   | 0.61  |
| hsa-mir-128a | GALNTL5  | 0.66  |
| hsa-mir-128a | GARNL3   | 0.63  |
| hsa-mir-128a | GFOD1    | 0.61  |
| hsa-mir-128a | GLS2     | 0.61  |
| hsa-mir-128a | GLT1D1   | 0.66  |
| hsa-mir-128a | GNAO1    | 0.67  |
| hsa-mir-128a | GNG3     | 0.59  |
| hsa-mir-128a | GOT1     | 0.61  |
| hsa-mir-128a | GPR26    | 0.61  |
| hsa-mir-128a | GPRASP2  | 0.51  |
| hsa-mir-128a | GPX7     | -0.54 |
| hsa-mir-128a | GRIN1    | 0.59  |
| hsa-mir-128a | GRM5     | 0.61  |
| hsa-mir-128a | GRM7     | 0.64  |
| hsa-mir-128a | GUCA1B   | 0.54  |
| hsa-mir-128a | HCN1     | 0.7   |
| hsa-mir-128a | HECW1    | 0.66  |
| hsa-mir-128a | HHATL    | 0.55  |
| hsa-mir-128a | HIST1H1D | -0.42 |
| hsa-mir-128a | HLF      | 0.59  |
| hsa-mir-128a | HMP19    | 0.63  |
| hsa-mir-128a | HPCAL4   | 0.65  |
| hsa-mir-128a | HRNBP3   | 0.64  |
| hsa-mir-128a | HS3ST4   | 0.65  |
| hsa-mir-128a | HS6ST3   | 0.62  |
| hsa-mir-128a | HSPA12A  | 0.68  |
| hsa-mir-128a | HSPB3    | 0.54  |
| hsa-mir-128a | HTR1E    | 0.59  |
| hsa-mir-128a | HTR2A    | 0.58  |
| hsa-mir-128a | HTR5A    | 0.69  |
| hsa-mir-128a | ICAM5    | 0.64  |

|              |           |       |
|--------------|-----------|-------|
| hsa-mir-128a | IKIP      | -0.63 |
| hsa-mir-128a | IL1RAPL1  | 0.68  |
| hsa-mir-128a | INA       | 0.62  |
| hsa-mir-128a | ISCA1     | 0.38  |
| hsa-mir-128a | ITGA5     | -0.52 |
| hsa-mir-128a | JAKMIP1   | 0.6   |
| hsa-mir-128a | JPH3      | 0.73  |
| hsa-mir-128a | KALRN     | 0.59  |
| hsa-mir-128a | KCNA4     | 0.61  |
| hsa-mir-128a | KCNB1     | 0.59  |
| hsa-mir-128a | KCNB2     | 0.63  |
| hsa-mir-128a | KCNC2     | 0.64  |
| hsa-mir-128a | KCNH3     | 0.57  |
| hsa-mir-128a | KCNJ12    | 0.6   |
| hsa-mir-128a | KCNJ3     | 0.62  |
| hsa-mir-128a | KCNK1     | 0.62  |
| hsa-mir-128a | KCNK12    | 0.53  |
| hsa-mir-128a | KCNMA1    | 0.58  |
| hsa-mir-128a | KCNV1     | 0.67  |
| hsa-mir-128a | KCTD16    | 0.68  |
| hsa-mir-128a | KCTD4     | 0.67  |
| hsa-mir-128a | KDEL2     | -0.61 |
| hsa-mir-128a | KHDRBS2   | 0.7   |
| hsa-mir-128a | KIAA0284  | 0.53  |
| hsa-mir-128a | KIAA0427  | 0.61  |
| hsa-mir-128a | KIAA0748  | 0.61  |
| hsa-mir-128a | KIAA0774  | 0.63  |
| hsa-mir-128a | KIAA1045  | 0.61  |
| hsa-mir-128a | KIAA1107  | 0.73  |
| hsa-mir-128a | KIAA1217  | 0.24  |
| hsa-mir-128a | KIAA1239  | 0.65  |
| hsa-mir-128a | KIAA1622  | 0.58  |
| hsa-mir-128a | KIAA1853  | 0.62  |
| hsa-mir-128a | KIAA1957  | 0.64  |
| hsa-mir-128a | KIF5A     | 0.68  |
| hsa-mir-128a | KIF5C     | 0.6   |
| hsa-mir-128a | KIT       | 0.47  |
| hsa-mir-128a | KRT222P   | 0.72  |
| hsa-mir-128a | KSR2      | 0.62  |
| hsa-mir-128a | LAMC1     | -0.59 |
| hsa-mir-128a | LARGE     | 0.61  |
| hsa-mir-128a | LDOC1     | 0.41  |
| hsa-mir-128a | LINGO1    | 0.6   |
| hsa-mir-128a | LINGO2    | 0.55  |
| hsa-mir-128a | LMAN1     | -0.54 |
| hsa-mir-128a | LMTK3     | 0.59  |
| hsa-mir-128a | LOC493869 | -0.61 |
| hsa-mir-128a | LOC554175 | 0.65  |
| hsa-mir-128a | LRFN2     | 0.73  |
| hsa-mir-128a | LRFN5     | 0.65  |
| hsa-mir-128a | LRRC7     | 0.67  |
| hsa-mir-128a | LRRC8B    | 0.57  |
| hsa-mir-128a | LRTM2     | 0.73  |

|              |          |       |
|--------------|----------|-------|
| hsa-mir-128a | MAL2     | 0.55  |
| hsa-mir-128a | MAP7D2   | 0.6   |
| hsa-mir-128a | MAPK8IP2 | 0.65  |
| hsa-mir-128a | MAST1    | 0.66  |
| hsa-mir-128a | MAST3    | 0.68  |
| hsa-mir-128a | MCF2     | 0.54  |
| hsa-mir-128a | MCHR2    | 0.65  |
| hsa-mir-128a | MDK      | -0.55 |
| hsa-mir-128a | MFSD4    | 0.68  |
| hsa-mir-128a | MGC39606 | 0.58  |
| hsa-mir-128a | MTMR7    | 0.59  |
| hsa-mir-128a | MYCBP    | -0.48 |
| hsa-mir-128a | MYT1L    | 0.68  |
| hsa-mir-128a | NAP1L2   | 0.68  |
| hsa-mir-128a | NAP1L3   | 0.7   |
| hsa-mir-128a | NAP1L5   | 0.64  |
| hsa-mir-128a | NBEA     | 0.61  |
| hsa-mir-128a | NCDN     | 0.6   |
| hsa-mir-128a | NEDD4    | -0.46 |
| hsa-mir-128a | NEFM     | 0.6   |
| hsa-mir-128a | NEGR1    | 0.62  |
| hsa-mir-128a | NEURL    | 0.69  |
| hsa-mir-128a | NEUROD2  | 0.61  |
| hsa-mir-128a | NEUROD6  | 0.63  |
| hsa-mir-128a | NGEF     | 0.53  |
| hsa-mir-128a | NMNAT2   | 0.59  |
| hsa-mir-128a | NOX4     | -0.54 |
| hsa-mir-128a | NPM2     | 0.73  |
| hsa-mir-128a | NPTX1    | 0.46  |
| hsa-mir-128a | NPY      | 0.52  |
| hsa-mir-128a | NPY1R    | 0.47  |
| hsa-mir-128a | NRGN     | 0.59  |
| hsa-mir-128a | NRP1     | -0.51 |
| hsa-mir-128a | NRSN1    | 0.57  |
| hsa-mir-128a | NRXN1    | 0.57  |
| hsa-mir-128a | NRXN2    | 0.52  |
| hsa-mir-128a | NRXN3    | 0.5   |
| hsa-mir-128a | NTNG2    | 0.58  |
| hsa-mir-128a | NUDT11   | 0.49  |
| hsa-mir-128a | NUP37    | -0.56 |
| hsa-mir-128a | NY-REN-7 | 0.64  |
| hsa-mir-128a | OLFM3    | 0.64  |
| hsa-mir-128a | OPCML    | 0.59  |
| hsa-mir-128a | OSMR     | -0.46 |
| hsa-mir-128a | PACSN1   | 0.68  |
| hsa-mir-128a | PAIP2B   | 0.6   |
| hsa-mir-128a | PAK3     | 0.61  |
| hsa-mir-128a | PAK7     | 0.64  |
| hsa-mir-128a | PCDH11Y  | 0.63  |
| hsa-mir-128a | PCSK2    | 0.64  |
| hsa-mir-128a | PDE2A    | 0.75  |
| hsa-mir-128a | PDIA3    | -0.47 |
| hsa-mir-128a | PDYN     | 0.56  |

|              |           |       |
|--------------|-----------|-------|
| hsa-mir-128a | PEA15     | 0.45  |
| hsa-mir-128a | PEX5L     | 0.62  |
| hsa-mir-128a | PHYHIP    | 0.63  |
| hsa-mir-128a | PI4KA     | 0.6   |
| hsa-mir-128a | PIP3-E    | 0.66  |
| hsa-mir-128a | PLCB1     | 0.56  |
| hsa-mir-128a | PLEK2     | -0.56 |
| hsa-mir-128a | PLEKHA1   | 0.59  |
| hsa-mir-128a | PNCK      | 0.7   |
| hsa-mir-128a | PNMA3     | 0.66  |
| hsa-mir-128a | PNMA5     | 0.69  |
| hsa-mir-128a | PPM1H     | 0.66  |
| hsa-mir-128a | PPP1R16B  | 0.67  |
| hsa-mir-128a | PPP1R1A   | 0.56  |
| hsa-mir-128a | PPP1R9A   | 0.48  |
| hsa-mir-128a | PPP2R2C   | 0.63  |
| hsa-mir-128a | PPP3CB    | 0.68  |
| hsa-mir-128a | PRDX4     | -0.6  |
| hsa-mir-128a | PRKCB1    | 0.54  |
| hsa-mir-128a | PRKCE     | 0.75  |
| hsa-mir-128a | PRMT8     | 0.64  |
| hsa-mir-128a | PRRT1     | 0.7   |
| hsa-mir-128a | PSD       | 0.68  |
| hsa-mir-128a | PTPN5     | 0.62  |
| hsa-mir-128a | PTPRT     | 0.58  |
| hsa-mir-128a | RAB11FIP4 | 0.66  |
| hsa-mir-128a | RAB40B    | 0.6   |
| hsa-mir-128a | RAB6B     | 0.53  |
| hsa-mir-128a | RAPGEF2   | 0.65  |
| hsa-mir-128a | RAPGEF4   | 0.67  |
| hsa-mir-128a | RASL10A   | 0.59  |
| hsa-mir-128a | RBM11     | 0.58  |
| hsa-mir-128a | RBMS1     | -0.55 |
| hsa-mir-128a | RDHE2     | 0.64  |
| hsa-mir-128a | REPS2     | 0.62  |
| hsa-mir-128a | RFPL2     | 0.62  |
| hsa-mir-128a | RFPL3     | 0.63  |
| hsa-mir-128a | RGS7      | 0.63  |
| hsa-mir-128a | RGS7BP    | 0.61  |
| hsa-mir-128a | RICH2     | 0.67  |
| hsa-mir-128a | RIMBP2    | 0.63  |
| hsa-mir-128a | RIMS2     | 0.63  |
| hsa-mir-128a | RIMS3     | 0.7   |
| hsa-mir-128a | RPRML     | 0.5   |
| hsa-mir-128a | RPS6KA5   | 0.58  |
| hsa-mir-128a | RTN4R     | 0.58  |
| hsa-mir-128a | RTN4RL1   | 0.65  |
| hsa-mir-128a | RUFY2     | 0.58  |
| hsa-mir-128a | RUNDC3A   | 0.72  |
| hsa-mir-128a | RUNDC3B   | 0.55  |
| hsa-mir-128a | RYR2      | 0.68  |
| hsa-mir-128a | SCAMP5    | 0.68  |
| hsa-mir-128a | SCN2A     | 0.67  |

|              |          |       |
|--------------|----------|-------|
| hsa-mir-128a | SEC14L5  | 0.6   |
| hsa-mir-128a | SERPINI1 | 0.57  |
| hsa-mir-128a | SFTPC    | 0.57  |
| hsa-mir-128a | SGIP1    | 0.61  |
| hsa-mir-128a | SGSM1    | 0.62  |
| hsa-mir-128a | SH3BGRL2 | 0.65  |
| hsa-mir-128a | SH3GL2   | 0.65  |
| hsa-mir-128a | SH3GL3   | 0.65  |
| hsa-mir-128a | SH3GLB2  | 0.51  |
| hsa-mir-128a | SHANK2   | 0.66  |
| hsa-mir-128a | SHCBP1   | -0.43 |
| hsa-mir-128a | SLC12A5  | 0.71  |
| hsa-mir-128a | SLC17A6  | 0.57  |
| hsa-mir-128a | SLC17A7  | 0.67  |
| hsa-mir-128a | SLC25A23 | 0.57  |
| hsa-mir-128a | SLC25A27 | 0.6   |
| hsa-mir-128a | SLC30A3  | 0.61  |
| hsa-mir-128a | SLC32A1  | 0.58  |
| hsa-mir-128a | SLC35F3  | 0.68  |
| hsa-mir-128a | SLC6A13  | 0.5   |
| hsa-mir-128a | SLC8A2   | 0.66  |
| hsa-mir-128a | SLITRK1  | 0.65  |
| hsa-mir-128a | SLITRK4  | 0.66  |
| hsa-mir-128a | SMPX     | 0.63  |
| hsa-mir-128a | SNAP25   | 0.54  |
| hsa-mir-128a | SNAP91   | 0.71  |
| hsa-mir-128a | SNCA     | 0.6   |
| hsa-mir-128a | SNCB     | 0.66  |
| hsa-mir-128a | SNCG     | 0.63  |
| hsa-mir-128a | SNIP     | 0.68  |
| hsa-mir-128a | SOHLH1   | 0.65  |
| hsa-mir-128a | SPG3A    | 0.66  |
| hsa-mir-128a | SPOCK3   | 0.59  |
| hsa-mir-128a | SRPX     | -0.51 |
| hsa-mir-128a | SRPX2    | -0.61 |
| hsa-mir-128a | SST      | 0.59  |
| hsa-mir-128a | SSTR1    | 0.69  |
| hsa-mir-128a | SSTR2    | 0.6   |
| hsa-mir-128a | STEAP3   | -0.57 |
| hsa-mir-128a | STX1A    | 0.61  |
| hsa-mir-128a | STXBP1   | 0.72  |
| hsa-mir-128a | STXBP5L  | 0.49  |
| hsa-mir-128a | STXBP6   | 0.55  |
| hsa-mir-128a | STYK1    | 0.61  |
| hsa-mir-128a | SULT4A1  | 0.63  |
| hsa-mir-128a | SV2B     | 0.54  |
| hsa-mir-128a | SYN2     | 0.66  |
| hsa-mir-128a | SYNPR    | 0.6   |
| hsa-mir-128a | SYP      | 0.7   |
| hsa-mir-128a | SYT1     | 0.58  |
| hsa-mir-128a | SYT13    | 0.66  |
| hsa-mir-128a | SYT3     | 0.57  |
| hsa-mir-128a | SYT4     | 0.55  |

|              |         |       |
|--------------|---------|-------|
| hsa-mir-128a | SYT5    | 0.67  |
| hsa-mir-128a | TCERG1L | 0.59  |
| hsa-mir-128a | TGIF1   | -0.57 |
| hsa-mir-128a | TIMP1   | -0.58 |
| hsa-mir-128a | TMCC2   | 0.65  |
| hsa-mir-128a | TMEM10  | 0.64  |
| hsa-mir-128a | TMEM130 | 0.49  |
| hsa-mir-128a | TMEM155 | 0.64  |
| hsa-mir-128a | TMEM16C | 0.73  |
| hsa-mir-128a | TMEM24  | 0.61  |
| hsa-mir-128a | TMEM45A | -0.44 |
| hsa-mir-128a | TNNI3K  | 0.53  |
| hsa-mir-128a | TNRC4   | 0.69  |
| hsa-mir-128a | TSPYL1  | 0.59  |
| hsa-mir-128a | TSPYL4  | 0.63  |
| hsa-mir-128a | TTC9B   | 0.6   |
| hsa-mir-128a | TUB     | 0.52  |
| hsa-mir-128a | UNC13A  | 0.61  |
| hsa-mir-128a | UNC13C  | 0.57  |
| hsa-mir-128a | VIM     | -0.57 |
| hsa-mir-128a | VIP     | 0.64  |
| hsa-mir-128a | VSNL1   | 0.55  |
| hsa-mir-128a | VSTM2L  | 0.53  |
| hsa-mir-128a | WDR7    | 0.6   |
| hsa-mir-128a | WEE1    | -0.59 |
| hsa-mir-128a | WNT10B  | 0.63  |
| hsa-mir-128a | WSCD2   | 0.62  |
| hsa-mir-128a | YPEL4   | 0.6   |
| hsa-mir-128a | YWHAH   | 0.52  |
| hsa-mir-128a | ZAK     | -0.6  |
| hsa-mir-128a | ZDHHC22 | 0.59  |
| hsa-mir-128a | ZNF248  | 0.59  |
| hsa-mir-128a | ZNF25   | 0.59  |
| hsa-mir-128a | ZNF365  | 0.6   |
| hsa-mir-128a | ZNF540  | 0.62  |
| hsa-mir-128b | March11 | 0.62  |
| hsa-mir-128b | Sept3   | 0.62  |
| hsa-mir-128b | A2BP1   | 0.7   |
| hsa-mir-128b | AATK    | 0.58  |
| hsa-mir-128b | ABCC12  | 0.56  |
| hsa-mir-128b | ABCG4   | 0.57  |
| hsa-mir-128b | ABHD7   | 0.43  |
| hsa-mir-128b | ABLIM2  | 0.65  |
| hsa-mir-128b | ACCN1   | 0.65  |
| hsa-mir-128b | ACTA1   | 0.52  |
| hsa-mir-128b | ACTL6B  | 0.59  |
| hsa-mir-128b | ACVR1C  | 0.58  |
| hsa-mir-128b | ADAD2   | 0.6   |
| hsa-mir-128b | ADAM11  | 0.71  |
| hsa-mir-128b | ADAM12  | -0.59 |
| hsa-mir-128b | ADARB2  | 0.6   |
| hsa-mir-128b | ADCY2   | 0.46  |
| hsa-mir-128b | ADRA1B  | 0.49  |

|              |           |       |
|--------------|-----------|-------|
| hsa-mir-128b | ADRA2C    | 0.54  |
| hsa-mir-128b | AGXT2L1   | 0.53  |
| hsa-mir-128b | AJAP1     | 0.54  |
| hsa-mir-128b | AK5       | 0.67  |
| hsa-mir-128b | AKAP11    | 0.61  |
| hsa-mir-128b | ALDOC     | 0.52  |
| hsa-mir-128b | AMN1      | 0.56  |
| hsa-mir-128b | AMPH      | 0.56  |
| hsa-mir-128b | AMZ1      | 0.5   |
| hsa-mir-128b | ANK3      | 0.55  |
| hsa-mir-128b | ANKRD34   | 0.69  |
| hsa-mir-128b | ANKRD43   | 0.59  |
| hsa-mir-128b | ANKS1B    | 0.58  |
| hsa-mir-128b | ANXA2     | -0.63 |
| hsa-mir-128b | APBA2     | 0.52  |
| hsa-mir-128b | ARHGDIG   | 0.75  |
| hsa-mir-128b | ARHGEF7   | 0.69  |
| hsa-mir-128b | ARPP-21   | 0.82  |
| hsa-mir-128b | ATOH7     | 0.62  |
| hsa-mir-128b | ATP1B1    | 0.57  |
| hsa-mir-128b | ATP2B3    | 0.68  |
| hsa-mir-128b | ATP6V0A1  | 0.62  |
| hsa-mir-128b | ATP6V1G2  | 0.71  |
| hsa-mir-128b | ATRNL1    | 0.57  |
| hsa-mir-128b | B3GALT2   | 0.6   |
| hsa-mir-128b | B3GAT1    | 0.51  |
| hsa-mir-128b | B3GNT1    | 0.52  |
| hsa-mir-128b | BAI3      | 0.49  |
| hsa-mir-128b | BASP1     | 0.57  |
| hsa-mir-128b | BEX1      | 0.57  |
| hsa-mir-128b | BEX2      | 0.62  |
| hsa-mir-128b | BEX4      | 0.57  |
| hsa-mir-128b | BEX5      | 0.61  |
| hsa-mir-128b | BRSK2     | 0.65  |
| hsa-mir-128b | BRUNOL4   | 0.72  |
| hsa-mir-128b | BRUNOL5   | 0.71  |
| hsa-mir-128b | BSN       | 0.75  |
| hsa-mir-128b | BZRAP1    | 0.6   |
| hsa-mir-128b | C10orf38  | 0.6   |
| hsa-mir-128b | C11orf41  | 0.53  |
| hsa-mir-128b | C13orf16  | 0.6   |
| hsa-mir-128b | C14orf132 | 0.52  |
| hsa-mir-128b | C16orf45  | 0.54  |
| hsa-mir-128b | C19orf30  | 0.55  |
| hsa-mir-128b | C1orf115  | 0.63  |
| hsa-mir-128b | C1QL3     | 0.63  |
| hsa-mir-128b | C1QTNF4   | 0.7   |
| hsa-mir-128b | C20orf39  | 0.48  |
| hsa-mir-128b | C2orf32   | 0.56  |
| hsa-mir-128b | C5orf30   | 0.56  |
| hsa-mir-128b | C5orf40   | 0.6   |
| hsa-mir-128b | C6orf114  | 0.58  |
| hsa-mir-128b | C6orf154  | 0.52  |



|              |          |       |
|--------------|----------|-------|
| hsa-mir-128b | C6orf159 | 0.54  |
| hsa-mir-128b | C7orf41  | 0.62  |
| hsa-mir-128b | C8orf47  | 0.46  |
| hsa-mir-128b | C9orf125 | 0.57  |
| hsa-mir-128b | C9orf164 | 0.6   |
| hsa-mir-128b | C9orf165 | 0.53  |
| hsa-mir-128b | C9orf4   | 0.59  |
| hsa-mir-128b | C9orf45  | 0.57  |
| hsa-mir-128b | CA10     | 0.56  |
| hsa-mir-128b | CA11     | 0.58  |
| hsa-mir-128b | CA4      | 0.42  |
| hsa-mir-128b | CABP1    | 0.74  |
| hsa-mir-128b | CACNA2D3 | 0.48  |
| hsa-mir-128b | CACNB1   | 0.69  |
| hsa-mir-128b | CACNG2   | 0.62  |
| hsa-mir-128b | CACNG3   | 0.72  |
| hsa-mir-128b | CADM2    | 0.48  |
| hsa-mir-128b | CALD1    | -0.5  |
| hsa-mir-128b | CALN1    | 0.56  |
| hsa-mir-128b | CALU     | -0.54 |
| hsa-mir-128b | CAMK1D   | 0.61  |
| hsa-mir-128b | CAMK1G   | 0.63  |
| hsa-mir-128b | CAMK2G   | 0.63  |
| hsa-mir-128b | CAMKV    | 0.71  |
| hsa-mir-128b | CAMTA1   | 0.59  |
| hsa-mir-128b | CAP2     | 0.47  |
| hsa-mir-128b | CARTPT   | 0.57  |
| hsa-mir-128b | CASP3    | -0.51 |
| hsa-mir-128b | CASP6    | -0.57 |
| hsa-mir-128b | CASP7    | -0.54 |
| hsa-mir-128b | CBFA2T3  | 0.61  |
| hsa-mir-128b | CBLN2    | 0.72  |
| hsa-mir-128b | CCDC109B | -0.6  |
| hsa-mir-128b | CCDC85A  | 0.66  |
| hsa-mir-128b | CCK      | 0.64  |
| hsa-mir-128b | CCKBR    | 0.71  |
| hsa-mir-128b | CD200    | 0.62  |
| hsa-mir-128b | CDH12    | 0.65  |
| hsa-mir-128b | CDH13    | 0.5   |
| hsa-mir-128b | CDH18    | 0.71  |
| hsa-mir-128b | CDH22    | 0.6   |
| hsa-mir-128b | CDH7     | 0.53  |
| hsa-mir-128b | CDH8     | 0.7   |
| hsa-mir-128b | CDH9     | 0.66  |
| hsa-mir-128b | CDK5R1   | 0.66  |
| hsa-mir-128b | CDKL2    | 0.45  |
| hsa-mir-128b | CDKL5    | 0.62  |
| hsa-mir-128b | CDKN2D   | 0.6   |
| hsa-mir-128b | CDR1     | 0.58  |
| hsa-mir-128b | CECR6    | 0.57  |
| hsa-mir-128b | CENTG1   | 0.52  |
| hsa-mir-128b | CHD5     | 0.69  |
| hsa-mir-128b | CHGA     | 0.65  |

|              |         |       |
|--------------|---------|-------|
| hsa-mir-128b | CHGB    | 0.58  |
| hsa-mir-128b | CKMT1A  | 0.73  |
| hsa-mir-128b | CLEC2L  | 0.68  |
| hsa-mir-128b | CLIC5   | 0.4   |
| hsa-mir-128b | CLTB    | 0.7   |
| hsa-mir-128b | CMTM3   | -0.58 |
| hsa-mir-128b | CMTM4   | 0.53  |
| hsa-mir-128b | CNKSR2  | 0.74  |
| hsa-mir-128b | CNTN3   | 0.69  |
| hsa-mir-128b | CNTN4   | 0.66  |
| hsa-mir-128b | CNTNAP2 | 0.58  |
| hsa-mir-128b | CNTNAP5 | 0.58  |
| hsa-mir-128b | COL1A2  | -0.45 |
| hsa-mir-128b | COL5A2  | -0.56 |
| hsa-mir-128b | CORO6   | 0.54  |
| hsa-mir-128b | CPEB3   | 0.73  |
| hsa-mir-128b | CPLX1   | 0.71  |
| hsa-mir-128b | CPLX2   | 0.72  |
| hsa-mir-128b | CPNE6   | 0.61  |
| hsa-mir-128b | CREG2   | 0.65  |
| hsa-mir-128b | CRHBP   | 0.62  |
| hsa-mir-128b | CRTAC1  | 0.64  |
| hsa-mir-128b | CRYM    | 0.64  |
| hsa-mir-128b | CSMD3   | 0.64  |
| hsa-mir-128b | CTXN3   | 0.61  |
| hsa-mir-128b | CUTL2   | 0.67  |
| hsa-mir-128b | CYFIP2  | 0.69  |
| hsa-mir-128b | CYP4X1  | 0.7   |
| hsa-mir-128b | DACH2   | 0.74  |
| hsa-mir-128b | DACT3   | 0.68  |
| hsa-mir-128b | DBC1    | 0.54  |
| hsa-mir-128b | DDN     | 0.65  |
| hsa-mir-128b | DDX25   | 0.5   |
| hsa-mir-128b | DGKB    | 0.54  |
| hsa-mir-128b | DIRAS2  | 0.52  |
| hsa-mir-128b | DLEU7   | 0.6   |
| hsa-mir-128b | DLG2    | 0.67  |
| hsa-mir-128b | DLGAP2  | 0.66  |
| hsa-mir-128b | DLL1    | 0.36  |
| hsa-mir-128b | DNAJC12 | 0.58  |
| hsa-mir-128b | DNAJC6  | 0.64  |
| hsa-mir-128b | DNM1    | 0.68  |
| hsa-mir-128b | DNM3    | 0.61  |
| hsa-mir-128b | DOC2A   | 0.7   |
| hsa-mir-128b | DOCK3   | 0.61  |
| hsa-mir-128b | DOCK9   | 0.5   |
| hsa-mir-128b | DOK6    | 0.65  |
| hsa-mir-128b | DPP10   | 0.63  |
| hsa-mir-128b | DPP4    | -0.46 |
| hsa-mir-128b | DRD1    | 0.65  |
| hsa-mir-128b | DRD1IP  | 0.72  |
| hsa-mir-128b | DSCAML1 | 0.56  |
| hsa-mir-128b | DUSP26  | 0.62  |

|              |           |       |
|--------------|-----------|-------|
| hsa-mir-128b | DUSP8     | 0.62  |
| hsa-mir-128b | DYNC111   | 0.59  |
| hsa-mir-128b | E2F7      | -0.53 |
| hsa-mir-128b | EFCBP2    | 0.68  |
| hsa-mir-128b | EFHA2     | 0.72  |
| hsa-mir-128b | EHD3      | 0.63  |
| hsa-mir-128b | EIF1B     | 0.37  |
| hsa-mir-128b | EIF4A2    | 0.55  |
| hsa-mir-128b | EIF4E2    | -0.59 |
| hsa-mir-128b | ELAVL4    | 0.54  |
| hsa-mir-128b | EMP3      | -0.55 |
| hsa-mir-128b | ENC1      | 0.5   |
| hsa-mir-128b | EPB41L1   | 0.58  |
| hsa-mir-128b | EPB49     | 0.6   |
| hsa-mir-128b | EPHB6     | 0.61  |
| hsa-mir-128b | ERBB4     | 0.51  |
| hsa-mir-128b | ERC2      | 0.71  |
| hsa-mir-128b | EVL       | 0.61  |
| hsa-mir-128b | EXTL1     | 0.65  |
| hsa-mir-128b | F2R       | -0.48 |
| hsa-mir-128b | FA2H      | 0.55  |
| hsa-mir-128b | FAM133A   | 0.5   |
| hsa-mir-128b | FAM19A1   | 0.64  |
| hsa-mir-128b | FAM19A2   | 0.71  |
| hsa-mir-128b | FAM19A5   | 0.45  |
| hsa-mir-128b | FAM46A    | -0.52 |
| hsa-mir-128b | FAM57B    | 0.64  |
| hsa-mir-128b | FAM81A    | 0.51  |
| hsa-mir-128b | FBXL15    | 0.58  |
| hsa-mir-128b | FBXL16    | 0.77  |
| hsa-mir-128b | FBXL2     | 0.43  |
| hsa-mir-128b | FBXO2     | 0.55  |
| hsa-mir-128b | FBXO40    | 0.59  |
| hsa-mir-128b | FBXO41    | 0.66  |
| hsa-mir-128b | FBXW7     | 0.67  |
| hsa-mir-128b | FGF12     | 0.61  |
| hsa-mir-128b | FGF13     | 0.6   |
| hsa-mir-128b | FGF9      | 0.58  |
| hsa-mir-128b | FKBP11    | -0.5  |
| hsa-mir-128b | FLJ20160  | 0.47  |
| hsa-mir-128b | FLJ37464  | 0.58  |
| hsa-mir-128b | FLJ40142  | 0.55  |
| hsa-mir-128b | FLRT1     | 0.57  |
| hsa-mir-128b | FN1       | -0.5  |
| hsa-mir-128b | FNDC3B    | -0.6  |
| hsa-mir-128b | FNDC5     | 0.49  |
| hsa-mir-128b | FREQ      | 0.54  |
| hsa-mir-128b | FRMPD4    | 0.67  |
| hsa-mir-128b | FRY       | 0.61  |
| hsa-mir-128b | FSTL1     | -0.56 |
| hsa-mir-128b | FSTL5     | 0.66  |
| hsa-mir-128b | FUT9      | 0.57  |
| hsa-mir-128b | GABARAPL1 | 0.58  |

|              |           |       |
|--------------|-----------|-------|
| hsa-mir-128b | GABARAPL3 | 0.63  |
| hsa-mir-128b | GABBR1    | 0.62  |
| hsa-mir-128b | GABRA1    | 0.68  |
| hsa-mir-128b | GABRA2    | 0.53  |
| hsa-mir-128b | GABRA4    | 0.62  |
| hsa-mir-128b | GABRA5    | 0.66  |
| hsa-mir-128b | GABRB3    | 0.58  |
| hsa-mir-128b | GABRG1    | 0.65  |
| hsa-mir-128b | GABRG2    | 0.72  |
| hsa-mir-128b | GAD1      | 0.52  |
| hsa-mir-128b | GAD2      | 0.59  |
| hsa-mir-128b | GAL3ST1   | 0.53  |
| hsa-mir-128b | GALNT9    | 0.61  |
| hsa-mir-128b | GALNTL5   | 0.68  |
| hsa-mir-128b | GARNL3    | 0.63  |
| hsa-mir-128b | GAST      | 0.54  |
| hsa-mir-128b | GDA       | 0.51  |
| hsa-mir-128b | GDF10     | 0.51  |
| hsa-mir-128b | GFOD1     | 0.63  |
| hsa-mir-128b | GLRB      | 0.52  |
| hsa-mir-128b | GLS       | 0.51  |
| hsa-mir-128b | GLS2      | 0.62  |
| hsa-mir-128b | GLT1D1    | 0.68  |
| hsa-mir-128b | GNAO1     | 0.68  |
| hsa-mir-128b | GNG3      | 0.61  |
| hsa-mir-128b | GOT1      | 0.62  |
| hsa-mir-128b | GPR158    | 0.46  |
| hsa-mir-128b | GPR22     | 0.65  |
| hsa-mir-128b | GPR26     | 0.63  |
| hsa-mir-128b | GPRASP1   | 0.46  |
| hsa-mir-128b | GPRASP2   | 0.53  |
| hsa-mir-128b | GPX7      | -0.53 |
| hsa-mir-128b | GREM2     | 0.65  |
| hsa-mir-128b | GRIN1     | 0.59  |
| hsa-mir-128b | GRIN2C    | 0.47  |
| hsa-mir-128b | GRM1      | 0.6   |
| hsa-mir-128b | GRM3      | 0.55  |
| hsa-mir-128b | GRM5      | 0.6   |
| hsa-mir-128b | GRM7      | 0.65  |
| hsa-mir-128b | GUCA2B    | 0.62  |
| hsa-mir-128b | HCN1      | 0.71  |
| hsa-mir-128b | HDGFRP3   | 0.56  |
| hsa-mir-128b | HECW1     | 0.67  |
| hsa-mir-128b | HLF       | 0.59  |
| hsa-mir-128b | HMGCLL1   | 0.55  |
| hsa-mir-128b | HMP19     | 0.66  |
| hsa-mir-128b | HPCAL4    | 0.67  |
| hsa-mir-128b | HRNBP3    | 0.66  |
| hsa-mir-128b | HS3ST4    | 0.67  |
| hsa-mir-128b | HS6ST3    | 0.64  |
| hsa-mir-128b | HSPA12A   | 0.7   |
| hsa-mir-128b | HSPB3     | 0.57  |
| hsa-mir-128b | HTR1E     | 0.59  |

|              |          |       |
|--------------|----------|-------|
| hsa-mir-128b | HTR2A    | 0.59  |
| hsa-mir-128b | HTR2C    | 0.64  |
| hsa-mir-128b | HTR5A    | 0.71  |
| hsa-mir-128b | ICAM5    | 0.64  |
| hsa-mir-128b | IDH1     | -0.36 |
| hsa-mir-128b | IGSF21   | 0.45  |
| hsa-mir-128b | IKIP     | -0.62 |
| hsa-mir-128b | IL1RAPL1 | 0.69  |
| hsa-mir-128b | INA      | 0.64  |
| hsa-mir-128b | INPP5A   | 0.61  |
| hsa-mir-128b | INPP5F   | 0.58  |
| hsa-mir-128b | ISCA1    | 0.39  |
| hsa-mir-128b | ITGA5    | -0.53 |
| hsa-mir-128b | ITPKA    | 0.46  |
| hsa-mir-128b | JAKMIP1  | 0.63  |
| hsa-mir-128b | JPH3     | 0.74  |
| hsa-mir-128b | KALRN    | 0.61  |
| hsa-mir-128b | KCNA4    | 0.62  |
| hsa-mir-128b | KCNAB1   | 0.62  |
| hsa-mir-128b | KCNB1    | 0.6   |
| hsa-mir-128b | KCNB2    | 0.65  |
| hsa-mir-128b | KCNC2    | 0.66  |
| hsa-mir-128b | KCNC3    | 0.54  |
| hsa-mir-128b | KCNH3    | 0.59  |
| hsa-mir-128b | KCNJ12   | 0.62  |
| hsa-mir-128b | KCNJ3    | 0.62  |
| hsa-mir-128b | KCNK1    | 0.64  |
| hsa-mir-128b | KCNK12   | 0.54  |
| hsa-mir-128b | KCNMA1   | 0.59  |
| hsa-mir-128b | KCNS1    | 0.55  |
| hsa-mir-128b | KCNV1    | 0.68  |
| hsa-mir-128b | KCTD16   | 0.69  |
| hsa-mir-128b | KCTD4    | 0.69  |
| hsa-mir-128b | KCTD8    | 0.44  |
| hsa-mir-128b | KDEL2    | -0.55 |
| hsa-mir-128b | KDEL2    | -0.61 |
| hsa-mir-128b | KHDRBS2  | 0.71  |
| hsa-mir-128b | KIAA0284 | 0.53  |
| hsa-mir-128b | KIAA0319 | 0.52  |
| hsa-mir-128b | KIAA0427 | 0.62  |
| hsa-mir-128b | KIAA0513 | 0.67  |
| hsa-mir-128b | KIAA0748 | 0.62  |
| hsa-mir-128b | KIAA0774 | 0.65  |
| hsa-mir-128b | KIAA1045 | 0.64  |
| hsa-mir-128b | KIAA1086 | 0.59  |
| hsa-mir-128b | KIAA1107 | 0.74  |
| hsa-mir-128b | KIAA1128 | 0.57  |
| hsa-mir-128b | KIAA1217 | 0.24  |
| hsa-mir-128b | KIAA1239 | 0.66  |
| hsa-mir-128b | KIAA1244 | 0.55  |
| hsa-mir-128b | KIAA1622 | 0.59  |
| hsa-mir-128b | KIAA1737 | 0.47  |
| hsa-mir-128b | KIAA1853 | 0.64  |

|              |           |       |
|--------------|-----------|-------|
| hsa-mir-128b | KIAA1957  | 0.64  |
| hsa-mir-128b | KIF1A     | 0.59  |
| hsa-mir-128b | KIF3A     | 0.56  |
| hsa-mir-128b | KIF5A     | 0.68  |
| hsa-mir-128b | KIF5C     | 0.61  |
| hsa-mir-128b | KIT       | 0.5   |
| hsa-mir-128b | KLHL1     | 0.64  |
| hsa-mir-128b | KLHL32    | 0.53  |
| hsa-mir-128b | KRT222P   | 0.74  |
| hsa-mir-128b | KSR2      | 0.64  |
| hsa-mir-128b | LANCL1    | 0.58  |
| hsa-mir-128b | LARGE     | 0.63  |
| hsa-mir-128b | LARP6     | 0.44  |
| hsa-mir-128b | LDOC1     | 0.42  |
| hsa-mir-128b | LEPRE1    | -0.5  |
| hsa-mir-128b | LGALS1    | -0.54 |
| hsa-mir-128b | LHX6      | 0.56  |
| hsa-mir-128b | LINGO1    | 0.63  |
| hsa-mir-128b | LINGO2    | 0.55  |
| hsa-mir-128b | LMAN1     | -0.54 |
| hsa-mir-128b | LNX1      | 0.41  |
| hsa-mir-128b | LOC399947 | 0.49  |
| hsa-mir-128b | LOC400120 | 0.63  |
| hsa-mir-128b | LOC400451 | 0.43  |
| hsa-mir-128b | LOC554175 | 0.66  |
| hsa-mir-128b | LOXL2     | -0.49 |
| hsa-mir-128b | LRFN2     | 0.75  |
| hsa-mir-128b | LRFN5     | 0.67  |
| hsa-mir-128b | LRRC49    | 0.38  |
| hsa-mir-128b | LRRC7     | 0.68  |
| hsa-mir-128b | LRRC8B    | 0.58  |
| hsa-mir-128b | LRRTM1    | 0.51  |
| hsa-mir-128b | LRTM2     | 0.75  |
| hsa-mir-128b | LY6H      | 0.49  |
| hsa-mir-128b | MAGEE1    | 0.59  |
| hsa-mir-128b | MAL2      | 0.57  |
| hsa-mir-128b | MAP2K4    | 0.65  |
| hsa-mir-128b | MAP7D2    | 0.62  |
| hsa-mir-128b | MAPK8IP2  | 0.67  |
| hsa-mir-128b | MAST1     | 0.67  |
| hsa-mir-128b | MAST3     | 0.68  |
| hsa-mir-128b | MCF2      | 0.55  |
| hsa-mir-128b | MCHR2     | 0.65  |
| hsa-mir-128b | MDK       | -0.53 |
| hsa-mir-128b | MEF2C     | 0.57  |
| hsa-mir-128b | MFSD4     | 0.7   |
| hsa-mir-128b | MGAT4C    | 0.47  |
| hsa-mir-128b | MGAT5B    | 0.54  |
| hsa-mir-128b | MGC39606  | 0.59  |
| hsa-mir-128b | MICAL2    | 0.55  |
| hsa-mir-128b | MMD2      | 0.5   |
| hsa-mir-128b | MOBP      | 0.54  |
| hsa-mir-128b | MPP7      | 0.53  |

|              |          |       |
|--------------|----------|-------|
| hsa-mir-128b | MTMR9    | 0.59  |
| hsa-mir-128b | MUM1L1   | 0.55  |
| hsa-mir-128b | MYCBP    | -0.48 |
| hsa-mir-128b | MYCBP2   | 0.54  |
| hsa-mir-128b | MYT1L    | 0.7   |
| hsa-mir-128b | NALCN    | 0.56  |
| hsa-mir-128b | NAP1L2   | 0.69  |
| hsa-mir-128b | NAP1L3   | 0.72  |
| hsa-mir-128b | NAP1L5   | 0.65  |
| hsa-mir-128b | NAPB     | 0.64  |
| hsa-mir-128b | NAT8L    | 0.5   |
| hsa-mir-128b | NBEA     | 0.62  |
| hsa-mir-128b | NCALD    | 0.5   |
| hsa-mir-128b | NCAM1    | 0.52  |
| hsa-mir-128b | NCDN     | 0.61  |
| hsa-mir-128b | NDRG2    | 0.48  |
| hsa-mir-128b | NDUFB8   | 0.6   |
| hsa-mir-128b | NEDD4    | -0.47 |
| hsa-mir-128b | NEFH     | 0.54  |
| hsa-mir-128b | NEFL     | 0.51  |
| hsa-mir-128b | NEFM     | 0.62  |
| hsa-mir-128b | NEGR1    | 0.63  |
| hsa-mir-128b | NELL2    | 0.3   |
| hsa-mir-128b | NETO1    | 0.59  |
| hsa-mir-128b | NEURL    | 0.71  |
| hsa-mir-128b | NEUROD2  | 0.63  |
| hsa-mir-128b | NEUROD6  | 0.64  |
| hsa-mir-128b | NGEF     | 0.54  |
| hsa-mir-128b | NICN1    | 0.49  |
| hsa-mir-128b | NKIRAS1  | 0.55  |
| hsa-mir-128b | NMNAT2   | 0.61  |
| hsa-mir-128b | NNMT     | -0.54 |
| hsa-mir-128b | NOX4     | -0.53 |
| hsa-mir-128b | NPM2     | 0.74  |
| hsa-mir-128b | NPTX1    | 0.47  |
| hsa-mir-128b | NPTXR    | 0.55  |
| hsa-mir-128b | NPY      | 0.53  |
| hsa-mir-128b | NPY1R    | 0.48  |
| hsa-mir-128b | NRGN     | 0.61  |
| hsa-mir-128b | NRP1     | -0.52 |
| hsa-mir-128b | NRSN1    | 0.59  |
| hsa-mir-128b | NRXN1    | 0.59  |
| hsa-mir-128b | NRXN2    | 0.54  |
| hsa-mir-128b | NRXN3    | 0.5   |
| hsa-mir-128b | NSF      | 0.68  |
| hsa-mir-128b | NTNG2    | 0.58  |
| hsa-mir-128b | NUDT11   | 0.5   |
| hsa-mir-128b | NXPH1    | 0.46  |
| hsa-mir-128b | NXT1     | -0.46 |
| hsa-mir-128b | NY-REN-7 | 0.65  |
| hsa-mir-128b | OCA2     | 0.49  |
| hsa-mir-128b | OLFM1    | 0.61  |
| hsa-mir-128b | OLFM3    | 0.66  |

|              |          |       |
|--------------|----------|-------|
| hsa-mir-128b | OMG      | 0.54  |
| hsa-mir-128b | OPCML    | 0.62  |
| hsa-mir-128b | OPRK1    | 0.55  |
| hsa-mir-128b | OR2L13   | 0.62  |
| hsa-mir-128b | P4HB     | -0.5  |
| hsa-mir-128b | PACSN1   | 0.71  |
| hsa-mir-128b | PAIP2B   | 0.61  |
| hsa-mir-128b | PAK3     | 0.62  |
| hsa-mir-128b | PAK7     | 0.66  |
| hsa-mir-128b | PALM     | 0.51  |
| hsa-mir-128b | PBEF1    | -0.5  |
| hsa-mir-128b | PCDH11Y  | 0.65  |
| hsa-mir-128b | PCSK2    | 0.65  |
| hsa-mir-128b | PDE1A    | 0.48  |
| hsa-mir-128b | PDE1B    | 0.55  |
| hsa-mir-128b | PDE2A    | 0.75  |
| hsa-mir-128b | PDYN     | 0.57  |
| hsa-mir-128b | PEA15    | 0.45  |
| hsa-mir-128b | PELI3    | 0.5   |
| hsa-mir-128b | PEX5L    | 0.64  |
| hsa-mir-128b | PHACTR3  | 0.52  |
| hsa-mir-128b | PHYHIP   | 0.65  |
| hsa-mir-128b | PHYHIPL  | 0.56  |
| hsa-mir-128b | PID1     | 0.48  |
| hsa-mir-128b | PIP3-E   | 0.67  |
| hsa-mir-128b | PLCB1    | 0.57  |
| hsa-mir-128b | PLEK2    | -0.57 |
| hsa-mir-128b | PLEKHA1  | 0.59  |
| hsa-mir-128b | PLP2     | -0.58 |
| hsa-mir-128b | PNCK     | 0.7   |
| hsa-mir-128b | PNMA1    | 0.46  |
| hsa-mir-128b | PNMA3    | 0.67  |
| hsa-mir-128b | PNMA5    | 0.7   |
| hsa-mir-128b | PPFIA4   | 0.5   |
| hsa-mir-128b | PPM1H    | 0.68  |
| hsa-mir-128b | PPM2C    | 0.35  |
| hsa-mir-128b | PPP1R16B | 0.7   |
| hsa-mir-128b | PPP1R1A  | 0.57  |
| hsa-mir-128b | PPP2R2C  | 0.65  |
| hsa-mir-128b | PPP3CA   | 0.66  |
| hsa-mir-128b | PPP3CB   | 0.69  |
| hsa-mir-128b | PRDX4    | -0.6  |
| hsa-mir-128b | PRKCB1   | 0.55  |
| hsa-mir-128b | PRKCE    | 0.75  |
| hsa-mir-128b | PRMT8    | 0.66  |
| hsa-mir-128b | PRRT1    | 0.71  |
| hsa-mir-128b | PSD      | 0.7   |
| hsa-mir-128b | PTH2R    | 0.56  |
| hsa-mir-128b | PTPN5    | 0.64  |
| hsa-mir-128b | PTPRR    | 0.42  |
| hsa-mir-128b | PTPRT    | 0.6   |
| hsa-mir-128b | QDPR     | 0.53  |
| hsa-mir-128b | R3HDM1   | 0.61  |



|              |              |       |
|--------------|--------------|-------|
| hsa-mir-128b | RAB11FIP2    | 0.48  |
| hsa-mir-128b | RAB11FIP4    | 0.68  |
| hsa-mir-128b | RAB15        | 0.53  |
| hsa-mir-128b | RAB33A       | 0.57  |
| hsa-mir-128b | RAB3A        | 0.71  |
| hsa-mir-128b | RAB40B       | 0.61  |
| hsa-mir-128b | RAB6B        | 0.54  |
| hsa-mir-128b | RAI2         | 0.51  |
| hsa-mir-128b | RAPGEF2      | 0.66  |
| hsa-mir-128b | RAPGEF3      | 0.52  |
| hsa-mir-128b | RAPGEF4      | 0.69  |
| hsa-mir-128b | RAPGEFL1     | 0.63  |
| hsa-mir-128b | RASAL1       | 0.6   |
| hsa-mir-128b | RASL10A      | 0.59  |
| hsa-mir-128b | RASL11B      | 0.46  |
| hsa-mir-128b | RBM11        | 0.58  |
| hsa-mir-128b | RBM24        | 0.22  |
| hsa-mir-128b | RBMS1        | -0.56 |
| hsa-mir-128b | RDHE2        | 0.64  |
| hsa-mir-128b | REEP1        | 0.53  |
| hsa-mir-128b | REPS2        | 0.63  |
| hsa-mir-128b | RFPL2        | 0.64  |
| hsa-mir-128b | RFPL3        | 0.64  |
| hsa-mir-128b | RGS11        | 0.34  |
| hsa-mir-128b | RGS7         | 0.65  |
| hsa-mir-128b | RGS7BP       | 0.61  |
| hsa-mir-128b | RICH2        | 0.69  |
| hsa-mir-128b | RIMBP2       | 0.65  |
| hsa-mir-128b | RIMS2        | 0.65  |
| hsa-mir-128b | RIMS3        | 0.72  |
| hsa-mir-128b | RNF41        | 0.63  |
| hsa-mir-128b | RP11-679B17. | 0.59  |
| hsa-mir-128b | RPRML        | 0.52  |
| hsa-mir-128b | RPS6KA5      | 0.59  |
| hsa-mir-128b | RSPO2        | 0.53  |
| hsa-mir-128b | RSPO3        | 0.49  |
| hsa-mir-128b | RTN1         | 0.51  |
| hsa-mir-128b | RTN4R        | 0.6   |
| hsa-mir-128b | RTN4RL1      | 0.66  |
| hsa-mir-128b | RUFY2        | 0.58  |
| hsa-mir-128b | RUNDC3A      | 0.74  |
| hsa-mir-128b | RUNDC3B      | 0.58  |
| hsa-mir-128b | RYR2         | 0.69  |
| hsa-mir-128b | SAMD12       | 0.68  |
| hsa-mir-128b | SATB1        | 0.55  |
| hsa-mir-128b | SCAMP5       | 0.7   |
| hsa-mir-128b | SCG3         | 0.52  |
| hsa-mir-128b | SCN2A        | 0.68  |
| hsa-mir-128b | SCN2B        | 0.57  |
| hsa-mir-128b | SCN3B        | 0.6   |
| hsa-mir-128b | SCN8A        | 0.51  |
| hsa-mir-128b | SEC14L5      | 0.61  |
| hsa-mir-128b | SERPINH1     | -0.58 |

|              |          |       |
|--------------|----------|-------|
| hsa-mir-128b | SERPINI1 | 0.58  |
| hsa-mir-128b | SGIP1    | 0.63  |
| hsa-mir-128b | SGSM1    | 0.64  |
| hsa-mir-128b | SH3BGRL2 | 0.67  |
| hsa-mir-128b | SH3GL2   | 0.66  |
| hsa-mir-128b | SH3GL3   | 0.66  |
| hsa-mir-128b | SHANK2   | 0.69  |
| hsa-mir-128b | SHANK3   | 0.6   |
| hsa-mir-128b | SHC3     | 0.45  |
| hsa-mir-128b | SIDT1    | 0.39  |
| hsa-mir-128b | SLC12A5  | 0.74  |
| hsa-mir-128b | SLC17A6  | 0.59  |
| hsa-mir-128b | SLC17A7  | 0.68  |
| hsa-mir-128b | SLC25A23 | 0.57  |
| hsa-mir-128b | SLC25A27 | 0.61  |
| hsa-mir-128b | SLC25A41 | 0.58  |
| hsa-mir-128b | SLC2A13  | 0.48  |
| hsa-mir-128b | SLC30A3  | 0.63  |
| hsa-mir-128b | SLC32A1  | 0.6   |
| hsa-mir-128b | SLC35F3  | 0.7   |
| hsa-mir-128b | SLC4A10  | 0.55  |
| hsa-mir-128b | SLC6A13  | 0.51  |
| hsa-mir-128b | SLC8A2   | 0.66  |
| hsa-mir-128b | SLCO1A2  | 0.53  |
| hsa-mir-128b | SLITRK1  | 0.67  |
| hsa-mir-128b | SLITRK4  | 0.67  |
| hsa-mir-128b | SLITRK5  | 0.51  |
| hsa-mir-128b | SMPX     | 0.64  |
| hsa-mir-128b | SNAP25   | 0.57  |
| hsa-mir-128b | SNAP91   | 0.73  |
| hsa-mir-128b | SNCA     | 0.62  |
| hsa-mir-128b | SNCB     | 0.68  |
| hsa-mir-128b | SNCG     | 0.64  |
| hsa-mir-128b | SNIP     | 0.7   |
| hsa-mir-128b | SNTG2    | 0.32  |
| hsa-mir-128b | SOHLH1   | 0.67  |
| hsa-mir-128b | SPG3A    | 0.69  |
| hsa-mir-128b | SPOCK3   | 0.6   |
| hsa-mir-128b | SRPX     | -0.52 |
| hsa-mir-128b | SRPX2    | -0.61 |
| hsa-mir-128b | SST      | 0.61  |
| hsa-mir-128b | SSTR1    | 0.71  |
| hsa-mir-128b | SSTR2    | 0.62  |
| hsa-mir-128b | SSX2IP   | 0.37  |
| hsa-mir-128b | ST8SIA3  | 0.59  |
| hsa-mir-128b | STMN4    | 0.48  |
| hsa-mir-128b | STOX2    | 0.53  |
| hsa-mir-128b | STX1A    | 0.62  |
| hsa-mir-128b | STXBP1   | 0.73  |
| hsa-mir-128b | STXBP5   | 0.46  |
| hsa-mir-128b | STXBP5L  | 0.51  |
| hsa-mir-128b | STXBP6   | 0.56  |
| hsa-mir-128b | STYK1    | 0.62  |

|              |           |       |
|--------------|-----------|-------|
| hsa-mir-128b | SULT4A1   | 0.65  |
| hsa-mir-128b | SV2B      | 0.55  |
| hsa-mir-128b | SYN2      | 0.67  |
| hsa-mir-128b | SYNPR     | 0.62  |
| hsa-mir-128b | SYP       | 0.72  |
| hsa-mir-128b | SYT1      | 0.6   |
| hsa-mir-128b | SYT13     | 0.69  |
| hsa-mir-128b | SYT3      | 0.58  |
| hsa-mir-128b | SYT4      | 0.58  |
| hsa-mir-128b | SYT5      | 0.68  |
| hsa-mir-128b | TAC1      | 0.49  |
| hsa-mir-128b | TAC3      | 0.47  |
| hsa-mir-128b | TAGLN3    | 0.53  |
| hsa-mir-128b | TANC1     | -0.33 |
| hsa-mir-128b | TBC1D9    | 0.36  |
| hsa-mir-128b | TBR1      | 0.59  |
| hsa-mir-128b | TCEAL2    | 0.45  |
| hsa-mir-128b | TCERG1L   | 0.62  |
| hsa-mir-128b | TFPI      | -0.43 |
| hsa-mir-128b | TGFBI     | -0.58 |
| hsa-mir-128b | TGIF1     | -0.56 |
| hsa-mir-128b | THRA      | 0.52  |
| hsa-mir-128b | TIMP1     | -0.59 |
| hsa-mir-128b | TIMP4     | -0.12 |
| hsa-mir-128b | TMCC2     | 0.67  |
| hsa-mir-128b | TMEFF2    | 0.55  |
| hsa-mir-128b | TMEM10    | 0.66  |
| hsa-mir-128b | TMEM130   | 0.51  |
| hsa-mir-128b | TMEM155   | 0.66  |
| hsa-mir-128b | TMEM16C   | 0.75  |
| hsa-mir-128b | TMEM24    | 0.61  |
| hsa-mir-128b | TMEM35    | 0.55  |
| hsa-mir-128b | TMEM45A   | -0.44 |
| hsa-mir-128b | TMEM59L   | 0.58  |
| hsa-mir-128b | TNFRSF12A | -0.56 |
| hsa-mir-128b | TNFRSF19  | -0.46 |
| hsa-mir-128b | TNNT2     | 0.58  |
| hsa-mir-128b | TNRC4     | 0.71  |
| hsa-mir-128b | TPPP      | 0.59  |
| hsa-mir-128b | TSPYL1    | 0.61  |
| hsa-mir-128b | TSPYL4    | 0.64  |
| hsa-mir-128b | TTC9B     | 0.63  |
| hsa-mir-128b | TUB       | 0.52  |
| hsa-mir-128b | TUBA8     | 0.69  |
| hsa-mir-128b | TWIST1    | -0.37 |
| hsa-mir-128b | TXNDC1    | -0.43 |
| hsa-mir-128b | UCHL1     | 0.4   |
| hsa-mir-128b | UNC13A    | 0.62  |
| hsa-mir-128b | UNC13C    | 0.58  |
| hsa-mir-128b | UPP1      | -0.49 |
| hsa-mir-128b | VAMP2     | 0.63  |
| hsa-mir-128b | VIM       | -0.57 |
| hsa-mir-128b | VIP       | 0.66  |

|              |          |       |
|--------------|----------|-------|
| hsa-mir-128b | VSNL1    | 0.56  |
| hsa-mir-128b | VSTM2L   | 0.54  |
| hsa-mir-128b | WASF1    | 0.66  |
| hsa-mir-128b | WDR47    | 0.62  |
| hsa-mir-128b | WDR7     | 0.6   |
| hsa-mir-128b | WEE1     | -0.58 |
| hsa-mir-128b | WNT10B   | 0.64  |
| hsa-mir-128b | WSCD2    | 0.63  |
| hsa-mir-128b | XK       | 0.45  |
| hsa-mir-128b | XKR4     | 0.53  |
| hsa-mir-128b | YPEL4    | 0.61  |
| hsa-mir-128b | YWHAH    | 0.53  |
| hsa-mir-128b | ZAK      | -0.59 |
| hsa-mir-128b | ZCCHC12  | 0.58  |
| hsa-mir-128b | ZDHHC22  | 0.6   |
| hsa-mir-128b | ZNF142   | 0.59  |
| hsa-mir-128b | ZNF217   | -0.59 |
| hsa-mir-128b | ZNF248   | 0.59  |
| hsa-mir-128b | ZNF25    | 0.6   |
| hsa-mir-128b | ZNF365   | 0.61  |
| hsa-mir-128b | ZNF533   | 0.43  |
| hsa-mir-128b | ZNF540   | 0.64  |
| hsa-mir-129  | March11  | 0.71  |
| hsa-mir-129  | A2BP1    | 0.66  |
| hsa-mir-129  | AATK     | 0.63  |
| hsa-mir-129  | ABCG4    | 0.52  |
| hsa-mir-129  | ACTA1    | 0.51  |
| hsa-mir-129  | ACVR1C   | 0.69  |
| hsa-mir-129  | ADAD2    | 0.66  |
| hsa-mir-129  | ADAM11   | 0.73  |
| hsa-mir-129  | ADRA1B   | 0.62  |
| hsa-mir-129  | AGXT2L1  | 0.54  |
| hsa-mir-129  | AIFM3    | 0.62  |
| hsa-mir-129  | AK5      | 0.68  |
| hsa-mir-129  | AKAP11   | 0.56  |
| hsa-mir-129  | AMPH     | 0.52  |
| hsa-mir-129  | ANKRD34  | 0.65  |
| hsa-mir-129  | ARHGDI3  | 0.77  |
| hsa-mir-129  | ARPP-21  | 0.57  |
| hsa-mir-129  | ASPHD1   | 0.49  |
| hsa-mir-129  | ATP1B1   | 0.57  |
| hsa-mir-129  | ATP2B3   | 0.72  |
| hsa-mir-129  | ATP6V0A1 | 0.55  |
| hsa-mir-129  | ATP6V1A  | 0.58  |
| hsa-mir-129  | ATP6V1G2 | 0.57  |
| hsa-mir-129  | ATP8A2   | 0.64  |
| hsa-mir-129  | ATRNL1   | 0.53  |
| hsa-mir-129  | BASP1    | 0.55  |
| hsa-mir-129  | BCAT1    | -0.39 |
| hsa-mir-129  | BEX2     | 0.58  |
| hsa-mir-129  | BEX5     | 0.54  |
| hsa-mir-129  | BRUNOL4  | 0.65  |
| hsa-mir-129  | BRUNOL5  | 0.63  |

|                    |               |             |
|--------------------|---------------|-------------|
| hsa-mir-129        | BSCL2         | 0.56        |
| hsa-mir-129        | BSN           | 0.64        |
| hsa-mir-129        | BZRAP1        | 0.52        |
| hsa-mir-129        | C10orf35      | 0.53        |
| hsa-mir-129        | C13orf16      | 0.63        |
| hsa-mir-129        | C1orf115      | 0.7         |
| hsa-mir-129        | C1QL3         | 0.76        |
| hsa-mir-129        | C1QTNF4       | 0.63        |
| hsa-mir-129        | C20orf174     | 0.58        |
| hsa-mir-129        | C6orf114      | 0.55        |
| hsa-mir-129        | C6orf154      | 0.59        |
| hsa-mir-129        | C9orf125      | 0.51        |
| hsa-mir-129        | C9orf16       | 0.44        |
| hsa-mir-129        | CA11          | 0.65        |
| hsa-mir-129        | CABP1         | 0.72        |
| hsa-mir-129        | CACNA2D3      | 0.56        |
| hsa-mir-129        | CACNB1        | 0.7         |
| hsa-mir-129        | CACNG3        | 0.73        |
| hsa-mir-129        | CALB2         | 0.5         |
| hsa-mir-129        | CALD1         | -0.51       |
| hsa-mir-129        | CAMK1G        | 0.66        |
| hsa-mir-129        | CAMK2G        | 0.64        |
| <b>hsa-mir-129</b> | <b>CAMKK1</b> | <b>0.72</b> |
| hsa-mir-129        | CAMKV         | 0.62        |
| hsa-mir-129        | CAP2          | 0.53        |
| hsa-mir-129        | CARTPT        | 0.54        |
| hsa-mir-129        | CBLN2         | 0.65        |
| hsa-mir-129        | CBX7          | 0.59        |
| hsa-mir-129        | CCDC85A       | 0.58        |
| hsa-mir-129        | CCK           | 0.63        |
| hsa-mir-129        | CCKBR         | 0.8         |
| hsa-mir-129        | CD200         | 0.53        |
| hsa-mir-129        | CD93          | -0.61       |
| hsa-mir-129        | CDH12         | 0.77        |
| hsa-mir-129        | CDH13         | 0.43        |
| hsa-mir-129        | CDH18         | 0.67        |
| hsa-mir-129        | CDH22         | 0.56        |
| hsa-mir-129        | CDH9          | 0.79        |
| hsa-mir-129        | CDKL5         | 0.66        |
| hsa-mir-129        | CHD5          | 0.66        |
| hsa-mir-129        | CHGA          | 0.59        |
| hsa-mir-129        | CKMT1A        | 0.68        |
| hsa-mir-129        | CLEC2L        | 0.77        |
| hsa-mir-129        | CLTB          | 0.75        |
| hsa-mir-129        | CNIH4         | -0.43       |
| hsa-mir-129        | CNKSR2        | 0.75        |
| hsa-mir-129        | CNTN4         | 0.62        |
| hsa-mir-129        | CNTNAP2       | 0.66        |
| hsa-mir-129        | COL4A1        | -0.63       |
| hsa-mir-129        | COL4A2        | -0.58       |
| hsa-mir-129        | CORO6         | 0.65        |
| hsa-mir-129        | CPEB3         | 0.66        |
| hsa-mir-129        | CPLX1         | 0.65        |

|             |          |       |
|-------------|----------|-------|
| hsa-mir-129 | CPLX2    | 0.77  |
| hsa-mir-129 | CPNE6    | 0.7   |
| hsa-mir-129 | CREG2    | 0.68  |
| hsa-mir-129 | CRHBP    | 0.64  |
| hsa-mir-129 | CRTAC1   | 0.53  |
| hsa-mir-129 | CRYM     | 0.66  |
| hsa-mir-129 | CTXN3    | 0.65  |
| hsa-mir-129 | CUTL2    | 0.64  |
| hsa-mir-129 | CYFIP2   | 0.57  |
| hsa-mir-129 | CYP4X1   | 0.72  |
| hsa-mir-129 | DACH2    | 0.61  |
| hsa-mir-129 | DDN      | 0.77  |
| hsa-mir-129 | DLG2     | 0.56  |
| hsa-mir-129 | DLGAP2   | 0.68  |
| hsa-mir-129 | DNAJC6   | 0.58  |
| hsa-mir-129 | DNM1     | 0.65  |
| hsa-mir-129 | DOC2A    | 0.75  |
| hsa-mir-129 | DOK6     | 0.6   |
| hsa-mir-129 | DPP10    | 0.56  |
| hsa-mir-129 | DRD1     | 0.74  |
| hsa-mir-129 | DRD1IP   | 0.76  |
| hsa-mir-129 | DTYMK    | -0.51 |
| hsa-mir-129 | DUSP8    | 0.57  |
| hsa-mir-129 | DYNC111  | 0.59  |
| hsa-mir-129 | EFCBP2   | 0.7   |
| hsa-mir-129 | EFHA2    | 0.73  |
| hsa-mir-129 | EHD3     | 0.58  |
| hsa-mir-129 | ELOVL7   | 0.46  |
| hsa-mir-129 | ENC1     | 0.55  |
| hsa-mir-129 | EPB49    | 0.72  |
| hsa-mir-129 | EPHB6    | 0.72  |
| hsa-mir-129 | ERC2     | 0.61  |
| hsa-mir-129 | FABP3    | 0.53  |
| hsa-mir-129 | FABP6    | 0.54  |
| hsa-mir-129 | FAM19A1  | 0.55  |
| hsa-mir-129 | FAM19A2  | 0.67  |
| hsa-mir-129 | FAM19A4  | 0.52  |
| hsa-mir-129 | FAM46A   | -0.52 |
| hsa-mir-129 | FAM79A   | 0.63  |
| hsa-mir-129 | FAM81A   | 0.59  |
| hsa-mir-129 | FBXL15   | 0.64  |
| hsa-mir-129 | FBXL16   | 0.63  |
| hsa-mir-129 | FBXO2    | 0.59  |
| hsa-mir-129 | FBXO40   | 0.66  |
| hsa-mir-129 | FBXO41   | 0.62  |
| hsa-mir-129 | FBXW7    | 0.63  |
| hsa-mir-129 | FGF13    | 0.67  |
| hsa-mir-129 | FGF9     | 0.54  |
| hsa-mir-129 | FLJ33534 | 0.55  |
| hsa-mir-129 | FLJ37464 | 0.64  |
| hsa-mir-129 | FLRT2    | 0.3   |
| hsa-mir-129 | FRMPD4   | 0.68  |
| hsa-mir-129 | FSTL5    | 0.64  |

|             |           |      |
|-------------|-----------|------|
| hsa-mir-129 | FUT9      | 0.44 |
| hsa-mir-129 | GABARAPL1 | 0.65 |
| hsa-mir-129 | GABARAPL3 | 0.65 |
| hsa-mir-129 | GABRA1    | 0.67 |
| hsa-mir-129 | GABRA2    | 0.58 |
| hsa-mir-129 | GABRA4    | 0.62 |
| hsa-mir-129 | GABRA5    | 0.73 |
| hsa-mir-129 | GABRB3    | 0.58 |
| hsa-mir-129 | GABRG1    | 0.62 |
| hsa-mir-129 | GABRG2    | 0.73 |
| hsa-mir-129 | GAD2      | 0.6  |
| hsa-mir-129 | GALNT9    | 0.55 |
| hsa-mir-129 | GALNTL5   | 0.68 |
| hsa-mir-129 | GAST      | 0.62 |
| hsa-mir-129 | GDA       | 0.67 |
| hsa-mir-129 | GFOD1     | 0.61 |
| hsa-mir-129 | GJB5      | 0.54 |
| hsa-mir-129 | GJB6      | 0.65 |
| hsa-mir-129 | GLS       | 0.64 |
| hsa-mir-129 | GLS2      | 0.73 |
| hsa-mir-129 | GLT1D1    | 0.73 |
| hsa-mir-129 | GNG3      | 0.54 |
| hsa-mir-129 | GOT1      | 0.72 |
| hsa-mir-129 | GPR22     | 0.67 |
| hsa-mir-129 | GPR26     | 0.65 |
| hsa-mir-129 | GREM2     | 0.76 |
| hsa-mir-129 | GRIN1     | 0.72 |
| hsa-mir-129 | GRIN2A    | 0.71 |
| hsa-mir-129 | GRM1      | 0.57 |
| hsa-mir-129 | GRM5      | 0.55 |
| hsa-mir-129 | GRM7      | 0.6  |
| hsa-mir-129 | HAR1A     | 0.71 |
| hsa-mir-129 | HCN1      | 0.75 |
| hsa-mir-129 | HECW1     | 0.67 |
| hsa-mir-129 | HHATL     | 0.58 |
| hsa-mir-129 | HLF       | 0.68 |
| hsa-mir-129 | HMGCLL1   | 0.63 |
| hsa-mir-129 | HPCAL4    | 0.58 |
| hsa-mir-129 | HRNBP3    | 0.71 |
| hsa-mir-129 | HS3ST2    | 0.52 |
| hsa-mir-129 | HS3ST4    | 0.69 |
| hsa-mir-129 | HS6ST3    | 0.65 |
| hsa-mir-129 | HSPA12A   | 0.65 |
| hsa-mir-129 | HSPB3     | 0.57 |
| hsa-mir-129 | HTR1E     | 0.75 |
| hsa-mir-129 | HTR2A     | 0.62 |
| hsa-mir-129 | HTR2C     | 0.75 |
| hsa-mir-129 | HTR5A     | 0.78 |
| hsa-mir-129 | ICAM5     | 0.77 |
| hsa-mir-129 | INA       | 0.64 |
| hsa-mir-129 | INPP5A    | 0.61 |
| hsa-mir-129 | INPP5F    | 0.66 |
| hsa-mir-129 | ITPKA     | 0.62 |

|             |           |       |
|-------------|-----------|-------|
| hsa-mir-129 | JAKMIP1   | 0.61  |
| hsa-mir-129 | JPH3      | 0.68  |
| hsa-mir-129 | KCNA1     | 0.5   |
| hsa-mir-129 | KCNA4     | 0.55  |
| hsa-mir-129 | KCNB2     | 0.67  |
| hsa-mir-129 | KCNC2     | 0.65  |
| hsa-mir-129 | KCNH3     | 0.62  |
| hsa-mir-129 | KCNJ12    | 0.72  |
| hsa-mir-129 | KCNJ3     | 0.62  |
| hsa-mir-129 | KCNK1     | 0.63  |
| hsa-mir-129 | KCNV1     | 0.77  |
| hsa-mir-129 | KCTD16    | 0.54  |
| hsa-mir-129 | KCTD4     | 0.56  |
| hsa-mir-129 | KCTD8     | 0.4   |
| hsa-mir-129 | KHDRBS2   | 0.69  |
| hsa-mir-129 | KIAA0513  | 0.74  |
| hsa-mir-129 | KIAA0748  | 0.75  |
| hsa-mir-129 | KIAA0774  | 0.75  |
| hsa-mir-129 | KIAA1045  | 0.58  |
| hsa-mir-129 | KIAA1107  | 0.67  |
| hsa-mir-129 | KIAA1239  | 0.68  |
| hsa-mir-129 | KIAA1324  | 0.49  |
| hsa-mir-129 | KIAA1622  | 0.71  |
| hsa-mir-129 | KIAA1853  | 0.55  |
| hsa-mir-129 | KIAA1957  | 0.54  |
| hsa-mir-129 | KLHL1     | 0.7   |
| hsa-mir-129 | KLK7      | 0.77  |
| hsa-mir-129 | KRT222P   | 0.78  |
| hsa-mir-129 | KSR2      | 0.65  |
| hsa-mir-129 | LAMC1     | -0.62 |
| hsa-mir-129 | LHX6      | 0.65  |
| hsa-mir-129 | LIN7B     | 0.57  |
| hsa-mir-129 | LINGO2    | 0.67  |
| hsa-mir-129 | LOC399947 | 0.48  |
| hsa-mir-129 | LOC400120 | 0.65  |
| hsa-mir-129 | LOC554175 | 0.65  |
| hsa-mir-129 | LOC728215 | 0.44  |
| hsa-mir-129 | LRFN2     | 0.6   |
| hsa-mir-129 | LRFN5     | 0.62  |
| hsa-mir-129 | LRRC7     | 0.66  |
| hsa-mir-129 | LRTM2     | 0.73  |
| hsa-mir-129 | MAGEE1    | 0.66  |
| hsa-mir-129 | MAL2      | 0.7   |
| hsa-mir-129 | MAP2K4    | 0.67  |
| hsa-mir-129 | MAP7D2    | 0.75  |
| hsa-mir-129 | MAST3     | 0.72  |
| hsa-mir-129 | MATK      | 0.79  |
| hsa-mir-129 | MCF2      | 0.47  |
| hsa-mir-129 | MCHR2     | 0.68  |
| hsa-mir-129 | MEST      | -0.4  |
| hsa-mir-129 | MFSD4     | 0.59  |
| hsa-mir-129 | MGAT4C    | 0.46  |
| hsa-mir-129 | MGC39606  | 0.6   |



|             |          |       |
|-------------|----------|-------|
| hsa-mir-129 | MICAL2   | 0.7   |
| hsa-mir-129 | MOBP     | 0.52  |
| hsa-mir-129 | MORC4    | -0.6  |
| hsa-mir-129 | MPP7     | 0.73  |
| hsa-mir-129 | MUM1L1   | 0.6   |
| hsa-mir-129 | MYT1L    | 0.63  |
| hsa-mir-129 | NAP1L2   | 0.58  |
| hsa-mir-129 | NAP1L3   | 0.61  |
| hsa-mir-129 | NAP1L5   | 0.57  |
| hsa-mir-129 | NAPB     | 0.7   |
| hsa-mir-129 | NBEA     | 0.49  |
| hsa-mir-129 | NCDN     | 0.67  |
| hsa-mir-129 | NDUFB8   | 0.64  |
| hsa-mir-129 | NEFH     | 0.61  |
| hsa-mir-129 | NEFL     | 0.6   |
| hsa-mir-129 | NEFM     | 0.65  |
| hsa-mir-129 | NEGR1    | 0.55  |
| hsa-mir-129 | NEURL    | 0.8   |
| hsa-mir-129 | NEUROD6  | 0.66  |
| hsa-mir-129 | NGEF     | 0.58  |
| hsa-mir-129 | NICN1    | 0.46  |
| hsa-mir-129 | NOX4     | -0.64 |
| hsa-mir-129 | NPM2     | 0.75  |
| hsa-mir-129 | NPTX1    | 0.52  |
| hsa-mir-129 | NPTXR    | 0.6   |
| hsa-mir-129 | NPY      | 0.53  |
| hsa-mir-129 | NPY1R    | 0.47  |
| hsa-mir-129 | NRG3     | 0.45  |
| hsa-mir-129 | NRGN     | 0.66  |
| hsa-mir-129 | NRSN1    | 0.48  |
| hsa-mir-129 | NSF      | 0.67  |
| hsa-mir-129 | NY-REN-7 | 0.74  |
| hsa-mir-129 | OCA2     | 0.65  |
| hsa-mir-129 | OGDHL    | 0.5   |
| hsa-mir-129 | OLFM3    | 0.59  |
| hsa-mir-129 | OPRK1    | 0.59  |
| hsa-mir-129 | PACSIN1  | 0.74  |
| hsa-mir-129 | PBK      | -0.46 |
| hsa-mir-129 | PCDH11Y  | 0.58  |
| hsa-mir-129 | PCLO     | 0.67  |
| hsa-mir-129 | PCSK2    | 0.54  |
| hsa-mir-129 | PDE2A    | 0.73  |
| hsa-mir-129 | PDYN     | 0.59  |
| hsa-mir-129 | PELI3    | 0.62  |
| hsa-mir-129 | PEX5L    | 0.6   |
| hsa-mir-129 | PHYHIP   | 0.65  |
| hsa-mir-129 | PI4KA    | 0.64  |
| hsa-mir-129 | PIP3-E   | 0.66  |
| hsa-mir-129 | PIP5K1B  | 0.53  |
| hsa-mir-129 | PLCB1    | 0.49  |
| hsa-mir-129 | PLCXD3   | 0.55  |
| hsa-mir-129 | PLEKHA1  | 0.63  |
| hsa-mir-129 | PLEKHG2  | -0.62 |

|             |           |       |
|-------------|-----------|-------|
| hsa-mir-129 | PNCK      | 0.77  |
| hsa-mir-129 | PNMA3     | 0.64  |
| hsa-mir-129 | PNMA5     | 0.65  |
| hsa-mir-129 | PNOC      | 0.52  |
| hsa-mir-129 | PPFIA3    | 0.58  |
| hsa-mir-129 | PPFIA4    | 0.51  |
| hsa-mir-129 | PPP1R16B  | 0.63  |
| hsa-mir-129 | PPP1R1A   | 0.57  |
| hsa-mir-129 | PPP2R2C   | 0.7   |
| hsa-mir-129 | PPP3CA    | 0.66  |
| hsa-mir-129 | PPP3CB    | 0.68  |
| hsa-mir-129 | PREPL     | 0.64  |
| hsa-mir-129 | PRKAR2B   | 0.46  |
| hsa-mir-129 | PRKCB1    | 0.61  |
| hsa-mir-129 | PRKCE     | 0.74  |
| hsa-mir-129 | PRMT8     | 0.65  |
| hsa-mir-129 | PRRT1     | 0.71  |
| hsa-mir-129 | PRSS3     | 0.7   |
| hsa-mir-129 | PSD       | 0.74  |
| hsa-mir-129 | PTPN12    | -0.52 |
| hsa-mir-129 | PTPN5     | 0.62  |
| hsa-mir-129 | PTPRR     | 0.61  |
| hsa-mir-129 | PTPRT     | 0.51  |
| hsa-mir-129 | PVALB     | 0.63  |
| hsa-mir-129 | RAB11FIP4 | 0.65  |
| hsa-mir-129 | RAB15     | 0.51  |
| hsa-mir-129 | RAB6B     | 0.53  |
| hsa-mir-129 | RALYL     | 0.43  |
| hsa-mir-129 | RAP1GAP   | 0.57  |
| hsa-mir-129 | RAPGEF2   | 0.55  |
| hsa-mir-129 | RAPGEFL1  | 0.65  |
| hsa-mir-129 | RASAL1    | 0.72  |
| hsa-mir-129 | RASL10A   | 0.59  |
| hsa-mir-129 | RBM11     | 0.69  |
| hsa-mir-129 | RBP4      | 0.71  |
| hsa-mir-129 | RDHE2     | 0.77  |
| hsa-mir-129 | RELN      | 0.64  |
| hsa-mir-129 | RFPL1     | 0.73  |
| hsa-mir-129 | RFPL2     | 0.7   |
| hsa-mir-129 | RGS4      | 0.51  |
| hsa-mir-129 | RGS7      | 0.54  |
| hsa-mir-129 | RICH2     | 0.72  |
| hsa-mir-129 | RIMBP2    | 0.71  |
| hsa-mir-129 | RIMS2     | 0.61  |
| hsa-mir-129 | RIMS3     | 0.66  |
| hsa-mir-129 | RNF41     | 0.55  |
| hsa-mir-129 | RPRML     | 0.5   |
| hsa-mir-129 | RSPO2     | 0.54  |
| hsa-mir-129 | RSPO3     | 0.57  |
| hsa-mir-129 | RTN4R     | 0.65  |
| hsa-mir-129 | RTN4RL1   | 0.76  |
| hsa-mir-129 | RUNDC3A   | 0.67  |
| hsa-mir-129 | RXFP1     | 0.47  |

|             |          |      |
|-------------|----------|------|
| hsa-mir-129 | RYR2     | 0.8  |
| hsa-mir-129 | SCAMP5   | 0.56 |
| hsa-mir-129 | SCN2A    | 0.52 |
| hsa-mir-129 | SCN3B    | 0.56 |
| hsa-mir-129 | SERPINI1 | 0.61 |
| hsa-mir-129 | SGSM1    | 0.54 |
| hsa-mir-129 | SH3BGRL2 | 0.63 |
| hsa-mir-129 | SH3GL2   | 0.57 |
| hsa-mir-129 | SH3GL3   | 0.66 |
| hsa-mir-129 | SH3GLB2  | 0.61 |
| hsa-mir-129 | SHANK2   | 0.64 |
| hsa-mir-129 | SLC12A5  | 0.71 |
| hsa-mir-129 | SLC17A7  | 0.82 |
| hsa-mir-129 | SLC25A27 | 0.54 |
| hsa-mir-129 | SLC30A3  | 0.7  |
| hsa-mir-129 | SLC32A1  | 0.58 |
| hsa-mir-129 | SLC35F3  | 0.69 |
| hsa-mir-129 | SLC39A10 | 0.49 |
| hsa-mir-129 | SLC4A10  | 0.58 |
| hsa-mir-129 | SLC7A10  | 0.45 |
| hsa-mir-129 | SLC8A2   | 0.77 |
| hsa-mir-129 | SLITRK4  | 0.6  |
| hsa-mir-129 | SMPX     | 0.76 |
| hsa-mir-129 | SNAP25   | 0.54 |
| hsa-mir-129 | SNAP91   | 0.61 |
| hsa-mir-129 | SNCA     | 0.66 |
| hsa-mir-129 | SNCB     | 0.71 |
| hsa-mir-129 | SNCG     | 0.81 |
| hsa-mir-129 | SNIP     | 0.6  |
| hsa-mir-129 | SOHLH1   | 0.72 |
| hsa-mir-129 | SPG3A    | 0.63 |
| hsa-mir-129 | SPOCK3   | 0.52 |
| hsa-mir-129 | SSTR1    | 0.72 |
| hsa-mir-129 | SSTR2    | 0.54 |
| hsa-mir-129 | ST8SIA3  | 0.53 |
| hsa-mir-129 | STAR     | 0.64 |
| hsa-mir-129 | STK32C   | 0.71 |
| hsa-mir-129 | STX1A    | 0.69 |
| hsa-mir-129 | STXBP1   | 0.72 |
| hsa-mir-129 | STXBP6   | 0.57 |
| hsa-mir-129 | STYK1    | 0.73 |
| hsa-mir-129 | SULT4A1  | 0.75 |
| hsa-mir-129 | SV2B     | 0.59 |
| hsa-mir-129 | SYN2     | 0.76 |
| hsa-mir-129 | SYNGR3   | 0.71 |
| hsa-mir-129 | SYNPR    | 0.58 |
| hsa-mir-129 | SYP      | 0.67 |
| hsa-mir-129 | SYT1     | 0.63 |
| hsa-mir-129 | SYT13    | 0.63 |
| hsa-mir-129 | SYT4     | 0.45 |
| hsa-mir-129 | SYT5     | 0.8  |
| hsa-mir-129 | TAC1     | 0.5  |
| hsa-mir-129 | TAGLN3   | 0.47 |

|              |         |       |
|--------------|---------|-------|
| hsa-mir-129  | TCERG1L | 0.69  |
| hsa-mir-129  | TMEM10  | 0.67  |
| hsa-mir-129  | TMEM130 | 0.51  |
| hsa-mir-129  | TMEM155 | 0.7   |
| hsa-mir-129  | TMEM16C | 0.64  |
| hsa-mir-129  | TNNT1   | 0.6   |
| hsa-mir-129  | TNNT2   | 0.72  |
| hsa-mir-129  | TNRC4   | 0.56  |
| hsa-mir-129  | TSPYL1  | 0.57  |
| hsa-mir-129  | TSPYL2  | 0.55  |
| hsa-mir-129  | TSPYL4  | 0.52  |
| hsa-mir-129  | TUBA4A  | 0.61  |
| hsa-mir-129  | TUBA8   | 0.72  |
| hsa-mir-129  | UNC13A  | 0.49  |
| hsa-mir-129  | UNC13C  | 0.66  |
| hsa-mir-129  | VAMP2   | 0.61  |
| hsa-mir-129  | VIP     | 0.64  |
| hsa-mir-129  | VSNL1   | 0.64  |
| hsa-mir-129  | VSTM2L  | 0.61  |
| hsa-mir-129  | WBSCR17 | 0.64  |
| hsa-mir-129  | WIF1    | 0.57  |
| hsa-mir-129  | WNT10B  | 0.8   |
| hsa-mir-129  | WSCD2   | 0.75  |
| hsa-mir-129  | YWHAH   | 0.58  |
| hsa-mir-129  | ZNF365  | 0.63  |
| hsa-mir-129  | ZNF533  | 0.58  |
| hsa-mir-130a | AKR1C1  | -0.42 |
| hsa-mir-130a | BUB1    | 0.37  |
| hsa-mir-130a | CA11    | -0.31 |
| hsa-mir-130a | CBX7    | -0.44 |
| hsa-mir-130a | DNAJA4  | -0.27 |
| hsa-mir-130a | F2R     | 0.38  |
| hsa-mir-130a | FAM79A  | -0.46 |
| hsa-mir-130a | FBXO2   | -0.38 |
| hsa-mir-130a | GABRA2  | -0.34 |
| hsa-mir-130a | GDA     | -0.47 |
| hsa-mir-130a | KCNK1   | -0.35 |
| hsa-mir-130a | KLHL2   | -0.42 |
| hsa-mir-130a | MAL2    | -0.36 |
| hsa-mir-130a | MATK    | -0.46 |
| hsa-mir-130a | PCDHB11 | 0.39  |
| hsa-mir-130a | PLCXD3  | -0.44 |
| hsa-mir-130a | PPP2R2C | -0.42 |
| hsa-mir-130a | RBM11   | -0.41 |
| hsa-mir-130a | STAR    | -0.42 |
| hsa-mir-130a | TMEM56  | -0.35 |
| hsa-mir-130a | TPD52L1 | -0.43 |
| hsa-mir-130a | TUBA4A  | -0.45 |
| hsa-mir-130a | XK      | -0.46 |
| hsa-mir-130b | March2  | -0.43 |
| hsa-mir-130b | ACOT6   | -0.47 |
| hsa-mir-130b | ADRB2   | -0.44 |
| hsa-mir-130b | AGTRL1  | -0.3  |

|              |          |       |
|--------------|----------|-------|
| hsa-mir-130b | AGXT2L1  | -0.4  |
| hsa-mir-130b | AIFM3    | -0.46 |
| hsa-mir-130b | ALDH1A1  | -0.43 |
| hsa-mir-130b | ALDH1L1  | -0.5  |
| hsa-mir-130b | ASF1B    | 0.49  |
| hsa-mir-130b | ASPM     | 0.68  |
| hsa-mir-130b | ATAD2    | 0.54  |
| hsa-mir-130b | ATAD5    | 0.63  |
| hsa-mir-130b | AURKA    | 0.6   |
| hsa-mir-130b | AURKB    | 0.57  |
| hsa-mir-130b | BCDO2    | -0.43 |
| hsa-mir-130b | BID      | 0.42  |
| hsa-mir-130b | BIRC5    | 0.64  |
| hsa-mir-130b | BRIP1    | 0.47  |
| hsa-mir-130b | BUB1     | 0.62  |
| hsa-mir-130b | BUB1B    | 0.63  |
| hsa-mir-130b | C11orf82 | 0.62  |
| hsa-mir-130b | C12orf48 | 0.56  |
| hsa-mir-130b | C13orf3  | 0.64  |
| hsa-mir-130b | C15orf21 | 0.49  |
| hsa-mir-130b | C15orf42 | 0.61  |
| hsa-mir-130b | C16orf59 | 0.54  |
| hsa-mir-130b | C16orf75 | 0.47  |
| hsa-mir-130b | C18orf24 | 0.6   |
| hsa-mir-130b | C18orf54 | 0.67  |
| hsa-mir-130b | C19orf57 | 0.49  |
| hsa-mir-130b | C1orf110 | -0.4  |
| hsa-mir-130b | C1orf135 | 0.4   |
| hsa-mir-130b | C5orf34  | 0.51  |
| hsa-mir-130b | C6orf173 | 0.52  |
| hsa-mir-130b | CA11     | -0.44 |
| hsa-mir-130b | CAB39L   | -0.41 |
| hsa-mir-130b | CASC5    | 0.6   |
| hsa-mir-130b | CBX7     | -0.53 |
| hsa-mir-130b | CCDC18   | 0.5   |
| hsa-mir-130b | CCDC5    | 0.55  |
| hsa-mir-130b | CCDC77   | 0.5   |
| hsa-mir-130b | CCNA2    | 0.65  |
| hsa-mir-130b | CCNB1    | 0.6   |
| hsa-mir-130b | CCNB2    | 0.67  |
| hsa-mir-130b | CCNE2    | 0.45  |
| hsa-mir-130b | CDC2     | 0.64  |
| hsa-mir-130b | CDC20    | 0.6   |
| hsa-mir-130b | CDC25A   | 0.54  |
| hsa-mir-130b | CDC25C   | 0.65  |
| hsa-mir-130b | CDC45L   | 0.72  |
| hsa-mir-130b | CDC6     | 0.59  |
| hsa-mir-130b | CDC7     | 0.54  |
| hsa-mir-130b | CDCA2    | 0.62  |
| hsa-mir-130b | CDCA3    | 0.59  |
| hsa-mir-130b | CDCA5    | 0.61  |
| hsa-mir-130b | CDCA7    | 0.55  |
| hsa-mir-130b | CDCA8    | 0.65  |

|              |             |       |
|--------------|-------------|-------|
| hsa-mir-130b | CDKN3       | 0.55  |
| hsa-mir-130b | CDS1        | -0.49 |
| hsa-mir-130b | CDT1        | 0.56  |
| hsa-mir-130b | CENPA       | 0.64  |
| hsa-mir-130b | CENPE       | 0.6   |
| hsa-mir-130b | CENPF       | 0.62  |
| hsa-mir-130b | CENPH       | 0.6   |
| hsa-mir-130b | CENPI       | 0.54  |
| hsa-mir-130b | CENPK       | 0.57  |
| hsa-mir-130b | CENPM       | 0.65  |
| hsa-mir-130b | CENPN       | 0.54  |
| hsa-mir-130b | CEP55       | 0.53  |
| hsa-mir-130b | CHAF1A      | 0.48  |
| hsa-mir-130b | CHAF1B      | 0.35  |
| hsa-mir-130b | CHEK1       | 0.54  |
| hsa-mir-130b | CHEK2       | 0.53  |
| hsa-mir-130b | CKAP2       | 0.53  |
| hsa-mir-130b | CKAP2L      | 0.67  |
| hsa-mir-130b | CKS2        | 0.55  |
| hsa-mir-130b | CLGN        | 0.17  |
| hsa-mir-130b | CLIP4       | -0.37 |
| hsa-mir-130b | CLSPN       | 0.52  |
| hsa-mir-130b | COL4A5      | -0.43 |
| hsa-mir-130b | CPE         | -0.45 |
| hsa-mir-130b | CSRP1       | -0.47 |
| hsa-mir-130b | CST3        | -0.46 |
| hsa-mir-130b | CYB5R1      | -0.45 |
| hsa-mir-130b | DBF4        | 0.57  |
| hsa-mir-130b | DDX39       | 0.58  |
| hsa-mir-130b | DENND3      | -0.4  |
| hsa-mir-130b | DEPDC1      | 0.52  |
| hsa-mir-130b | DEPDC1B     | 0.67  |
| hsa-mir-130b | DIAPH3      | 0.48  |
| hsa-mir-130b | KFZp762E131 | 0.68  |
| hsa-mir-130b | DLG7        | 0.62  |
| hsa-mir-130b | DNA2L       | 0.55  |
| hsa-mir-130b | DNMT3B      | 0.46  |
| hsa-mir-130b | DOT1L       | 0.44  |
| hsa-mir-130b | DSEL        | 0.42  |
| hsa-mir-130b | DSN1        | 0.5   |
| hsa-mir-130b | DTL         | 0.66  |
| hsa-mir-130b | DYNLRB2     | -0.48 |
| hsa-mir-130b | E2F1        | 0.51  |
| hsa-mir-130b | E2F2        | 0.59  |
| hsa-mir-130b | E2F8        | 0.52  |
| hsa-mir-130b | ECT2        | 0.6   |
| hsa-mir-130b | EMX2        | -0.42 |
| hsa-mir-130b | EMX2OS      | -0.43 |
| hsa-mir-130b | EPHB3       | 0.36  |
| hsa-mir-130b | ERCC6L      | 0.61  |
| hsa-mir-130b | ESCO2       | 0.65  |
| hsa-mir-130b | EXO1        | 0.63  |
| hsa-mir-130b | EZH2        | 0.6   |

|              |          |       |
|--------------|----------|-------|
| hsa-mir-130b | FAM110A  | 0.49  |
| hsa-mir-130b | FAM27E1  | 0.43  |
| hsa-mir-130b | FAM54A   | 0.59  |
| hsa-mir-130b | FAM64A   | 0.64  |
| hsa-mir-130b | FAM79A   | -0.47 |
| hsa-mir-130b | FAM83D   | 0.59  |
| hsa-mir-130b | FANCA    | 0.55  |
| hsa-mir-130b | FANCC    | 0.58  |
| hsa-mir-130b | FANCD2   | 0.61  |
| hsa-mir-130b | FANCE    | 0.53  |
| hsa-mir-130b | FANCG    | 0.48  |
| hsa-mir-130b | FANCI    | 0.65  |
| hsa-mir-130b | FANK1    | -0.44 |
| hsa-mir-130b | FBXO5    | 0.62  |
| hsa-mir-130b | FEN1     | 0.48  |
| hsa-mir-130b | FLJ39660 | 0.49  |
| hsa-mir-130b | FLJ41603 | -0.5  |
| hsa-mir-130b | FOXO1    | 0.62  |
| hsa-mir-130b | FXYD1    | -0.45 |
| hsa-mir-130b | GAS2L3   | 0.47  |
| hsa-mir-130b | GGH      | 0.45  |
| hsa-mir-130b | GINS1    | 0.54  |
| hsa-mir-130b | GINS2    | 0.58  |
| hsa-mir-130b | GPC5     | -0.42 |
| hsa-mir-130b | GPR37    | -0.43 |
| hsa-mir-130b | GSG2     | 0.56  |
| hsa-mir-130b | GTSE1    | 0.69  |
| hsa-mir-130b | H2AFZ    | 0.48  |
| hsa-mir-130b | HELLS    | 0.56  |
| hsa-mir-130b | HEPH     | -0.48 |
| hsa-mir-130b | HIST1H1B | 0.48  |
| hsa-mir-130b | HIST1H4B | 0.49  |
| hsa-mir-130b | HMG4L    | 0.55  |
| hsa-mir-130b | HMGB2    | 0.56  |
| hsa-mir-130b | HMGB3    | 0.53  |
| hsa-mir-130b | HMMR     | 0.51  |
| hsa-mir-130b | HN1      | 0.56  |
| hsa-mir-130b | INTS7    | 0.55  |
| hsa-mir-130b | ITPKB    | -0.41 |
| hsa-mir-130b | KIAA0101 | 0.54  |
| hsa-mir-130b | KIAA0922 | 0.45  |
| hsa-mir-130b | KIAA1524 | 0.51  |
| hsa-mir-130b | KIF11    | 0.63  |
| hsa-mir-130b | KIF14    | 0.61  |
| hsa-mir-130b | KIF15    | 0.64  |
| hsa-mir-130b | KIF18A   | 0.59  |
| hsa-mir-130b | KIF20A   | 0.57  |
| hsa-mir-130b | KIF23    | 0.63  |
| hsa-mir-130b | KIF2C    | 0.65  |
| hsa-mir-130b | KIF4A    | 0.62  |
| hsa-mir-130b | KIFC1    | 0.71  |
| hsa-mir-130b | KLHDC9   | -0.5  |
| hsa-mir-130b | KNDC1    | -0.55 |

|              |           |       |
|--------------|-----------|-------|
| hsa-mir-130b | KNTC1     | 0.55  |
| hsa-mir-130b | KPNA2     | 0.52  |
| hsa-mir-130b | LDHD      | -0.57 |
| hsa-mir-130b | LGI1      | -0.48 |
| hsa-mir-130b | LGR6      | -0.4  |
| hsa-mir-130b | LIMA1     | 0.5   |
| hsa-mir-130b | LIN9      | 0.54  |
| hsa-mir-130b | LMNB1     | 0.59  |
| hsa-mir-130b | LOC81691  | 0.5   |
| hsa-mir-130b | LOC91431  | 0.49  |
| hsa-mir-130b | LRMP      | -0.39 |
| hsa-mir-130b | LTC4S     | -0.43 |
| hsa-mir-130b | MAD2L1    | 0.62  |
| hsa-mir-130b | MASTL     | 0.56  |
| hsa-mir-130b | MATN4     | 0.48  |
| hsa-mir-130b | MCM10     | 0.65  |
| hsa-mir-130b | MCM2      | 0.51  |
| hsa-mir-130b | MCM4      | 0.46  |
| hsa-mir-130b | MCM6      | 0.49  |
| hsa-mir-130b | MCM8      | 0.54  |
| hsa-mir-130b | MELK      | 0.58  |
| hsa-mir-130b | METTL7A   | -0.42 |
| hsa-mir-130b | MEX3A     | 0.6   |
| hsa-mir-130b | MEX3B     | 0.44  |
| hsa-mir-130b | MKI67     | 0.58  |
| hsa-mir-130b | MKRN3     | 0.43  |
| hsa-mir-130b | MLF1IP    | 0.65  |
| hsa-mir-130b | MND1      | 0.59  |
| hsa-mir-130b | MSH6      | 0.45  |
| hsa-mir-130b | MXD3      | 0.61  |
| hsa-mir-130b | MYB       | 0.47  |
| hsa-mir-130b | MYBL1     | 0.47  |
| hsa-mir-130b | MYBL2     | 0.6   |
| hsa-mir-130b | MYBPC1    | -0.45 |
| hsa-mir-130b | NASP      | 0.43  |
| hsa-mir-130b | NCAPG2    | 0.51  |
| hsa-mir-130b | NCAPH     | 0.64  |
| hsa-mir-130b | NDC80     | 0.65  |
| hsa-mir-130b | NEIL3     | 0.62  |
| hsa-mir-130b | NEK2      | 0.64  |
| hsa-mir-130b | NMU       | 0.39  |
| hsa-mir-130b | NR0B1     | 0.25  |
| hsa-mir-130b | NT5DC1    | -0.42 |
| hsa-mir-130b | NUF2      | 0.67  |
| hsa-mir-130b | NUSAP1    | 0.62  |
| hsa-mir-130b | NY-SAR-48 | 0.66  |
| hsa-mir-130b | OGDHL     | -0.46 |
| hsa-mir-130b | OIP5      | 0.57  |
| hsa-mir-130b | OPLAH     | -0.45 |
| hsa-mir-130b | ORC1L     | 0.59  |
| hsa-mir-130b | ORC6L     | 0.63  |
| hsa-mir-130b | PAQR8     | -0.46 |
| hsa-mir-130b | PBK       | 0.63  |



|              |          |       |
|--------------|----------|-------|
| hsa-mir-130b | PCNA     | 0.49  |
| hsa-mir-130b | PEBP4    | -0.47 |
| hsa-mir-130b | PIF1     | 0.58  |
| hsa-mir-130b | PLEKHK1  | 0.62  |
| hsa-mir-130b | PLK4     | 0.64  |
| hsa-mir-130b | POLE2    | 0.54  |
| hsa-mir-130b | POLG     | 0.63  |
| hsa-mir-130b | POLQ     | 0.57  |
| hsa-mir-130b | PPIL5    | 0.52  |
| hsa-mir-130b | PRC1     | 0.62  |
| hsa-mir-130b | PRIM1    | 0.52  |
| hsa-mir-130b | PRNP     | -0.58 |
| hsa-mir-130b | PTTG1    | 0.62  |
| hsa-mir-130b | PTTG2    | 0.64  |
| hsa-mir-130b | PTTG3    | 0.64  |
| hsa-mir-130b | PYGM     | -0.46 |
| hsa-mir-130b | RAB37    | -0.48 |
| hsa-mir-130b | RACGAP1  | 0.69  |
| hsa-mir-130b | RACGAP1P | 0.62  |
| hsa-mir-130b | RAD51    | 0.63  |
| hsa-mir-130b | RAD51AP1 | 0.6   |
| hsa-mir-130b | RAD54L   | 0.62  |
| hsa-mir-130b | RANBP1   | 0.63  |
| hsa-mir-130b | RBKS     | -0.5  |
| hsa-mir-130b | RFC3     | 0.55  |
| hsa-mir-130b | RFC4     | 0.59  |
| hsa-mir-130b | RFC5     | 0.47  |
| hsa-mir-130b | RMI1     | 0.42  |
| hsa-mir-130b | RNASEH2A | 0.61  |
| hsa-mir-130b | RRM2     | 0.56  |
| hsa-mir-130b | SELPLG   | -0.5  |
| hsa-mir-130b | SGOL2    | 0.62  |
| hsa-mir-130b | SH3BP4   | 0.47  |
| hsa-mir-130b | SLC1A2   | -0.47 |
| hsa-mir-130b | SLC25A18 | -0.43 |
| hsa-mir-130b | SMAD4    | 0.41  |
| hsa-mir-130b | SMC2     | 0.48  |
| hsa-mir-130b | SMC4     | 0.57  |
| hsa-mir-130b | SMC6     | 0.37  |
| hsa-mir-130b | SNTA1    | -0.49 |
| hsa-mir-130b | SORL1    | -0.49 |
| hsa-mir-130b | SOX11    | 0.52  |
| hsa-mir-130b | SPAG5    | 0.62  |
| hsa-mir-130b | SPATA20  | -0.52 |
| hsa-mir-130b | SPC25    | 0.62  |
| hsa-mir-130b | SRPK1    | 0.44  |
| hsa-mir-130b | STEAP2   | -0.47 |
| hsa-mir-130b | STIL     | 0.57  |
| hsa-mir-130b | SUSD3    | -0.38 |
| hsa-mir-130b | SUV39H2  | 0.56  |
| hsa-mir-130b | TACC3    | 0.54  |
| hsa-mir-130b | TIMELESS | 0.61  |
| hsa-mir-130b | TK1      | 0.55  |

|              |          |       |
|--------------|----------|-------|
| hsa-mir-130b | TMPO     | 0.6   |
| hsa-mir-130b | TMSL8    | 0.46  |
| hsa-mir-130b | TNFSF12  | -0.55 |
| hsa-mir-130b | TOP2A    | 0.66  |
| hsa-mir-130b | TPX2     | 0.64  |
| hsa-mir-130b | TRAF4    | 0.48  |
| hsa-mir-130b | TRAIP    | 0.65  |
| hsa-mir-130b | TRIP13   | 0.53  |
| hsa-mir-130b | TROAP    | 0.61  |
| hsa-mir-130b | TTK      | 0.64  |
| hsa-mir-130b | TUBB     | 0.48  |
| hsa-mir-130b | TYMS     | 0.56  |
| hsa-mir-130b | UBE2C    | 0.67  |
| hsa-mir-130b | UBE2S    | 0.56  |
| hsa-mir-130b | UBE2T    | 0.59  |
| hsa-mir-130b | VRK1     | 0.49  |
| hsa-mir-130b | WDR51A   | 0.54  |
| hsa-mir-130b | WDR76    | 0.47  |
| hsa-mir-130b | WFS1     | -0.5  |
| hsa-mir-130b | XRCC2    | 0.56  |
| hsa-mir-130b | YBX1     | 0.51  |
| hsa-mir-130b | YPEL1    | 0.37  |
| hsa-mir-130b | ZNF300   | 0.61  |
| hsa-mir-130b | ZNF385   | -0.47 |
| hsa-mir-130b | ZNF649   | 0.26  |
| hsa-mir-130b | ZWINT    | 0.64  |
| hsa-mir-132  | March11  | 0.56  |
| hsa-mir-132  | ACCN1    | 0.59  |
| hsa-mir-132  | ADAD2    | 0.56  |
| hsa-mir-132  | ADCYAP1  | 0.45  |
| hsa-mir-132  | AK5      | 0.51  |
| hsa-mir-132  | AKAP5    | 0.41  |
| hsa-mir-132  | ANKRD34  | 0.57  |
| hsa-mir-132  | AP3M2    | 0.31  |
| hsa-mir-132  | ATP6V1A  | 0.46  |
| hsa-mir-132  | ATP8A2   | 0.51  |
| hsa-mir-132  | BEX5     | 0.47  |
| hsa-mir-132  | BRUNOL4  | 0.52  |
| hsa-mir-132  | C15orf27 | 0.48  |
| hsa-mir-132  | C1orf115 | 0.56  |
| hsa-mir-132  | C5orf40  | 0.55  |
| hsa-mir-132  | C6orf117 | 0.41  |
| hsa-mir-132  | C6orf154 | 0.52  |
| hsa-mir-132  | CA11     | 0.53  |
| hsa-mir-132  | CABP1    | 0.56  |
| hsa-mir-132  | CACNA2D3 | 0.44  |
| hsa-mir-132  | CACNB1   | 0.57  |
| hsa-mir-132  | CACNG3   | 0.59  |
| hsa-mir-132  | CAMK1G   | 0.57  |
| hsa-mir-132  | CARTPT   | 0.44  |
| hsa-mir-132  | CBLN2    | 0.49  |
| hsa-mir-132  | CCK      | 0.49  |
| hsa-mir-132  | CCKBR    | 0.62  |

|             |         |       |
|-------------|---------|-------|
| hsa-mir-132 | CDH13   | 0.24  |
| hsa-mir-132 | CDH18   | 0.45  |
| hsa-mir-132 | CDH7    | 0.43  |
| hsa-mir-132 | CDH9    | 0.57  |
| hsa-mir-132 | CHGB    | 0.42  |
| hsa-mir-132 | CKMT1A  | 0.48  |
| hsa-mir-132 | CLEC2L  | 0.61  |
| hsa-mir-132 | CLIC4   | -0.34 |
| hsa-mir-132 | CLTB    | 0.56  |
| hsa-mir-132 | CNTN4   | 0.55  |
| hsa-mir-132 | CPLX2   | 0.57  |
| hsa-mir-132 | CREG2   | 0.56  |
| hsa-mir-132 | CRH     | 0.5   |
| hsa-mir-132 | CRHBP   | 0.56  |
| hsa-mir-132 | CRYM    | 0.51  |
| hsa-mir-132 | DACH2   | 0.45  |
| hsa-mir-132 | DLEU7   | 0.43  |
| hsa-mir-132 | DNAJA4  | 0.44  |
| hsa-mir-132 | DNM1    | 0.57  |
| hsa-mir-132 | DOK6    | 0.44  |
| hsa-mir-132 | DRD1    | 0.56  |
| hsa-mir-132 | DRD1IP  | 0.59  |
| hsa-mir-132 | EFCBP2  | 0.53  |
| hsa-mir-132 | ENC1    | 0.51  |
| hsa-mir-132 | EPB49   | 0.52  |
| hsa-mir-132 | ERC2    | 0.49  |
| hsa-mir-132 | FABP3   | 0.47  |
| hsa-mir-132 | FAM19A1 | 0.54  |
| hsa-mir-132 | FBXL16  | 0.49  |
| hsa-mir-132 | FBXW7   | 0.53  |
| hsa-mir-132 | FEZF2   | 0.44  |
| hsa-mir-132 | FGF13   | 0.44  |
| hsa-mir-132 | FRMPD4  | 0.55  |
| hsa-mir-132 | FSTL5   | 0.53  |
| hsa-mir-132 | GABRA1  | 0.53  |
| hsa-mir-132 | GABRA2  | 0.46  |
| hsa-mir-132 | GABRA4  | 0.54  |
| hsa-mir-132 | GABRA5  | 0.57  |
| hsa-mir-132 | GABRB3  | 0.48  |
| hsa-mir-132 | GABRG2  | 0.58  |
| hsa-mir-132 | GAD2    | 0.48  |
| hsa-mir-132 | GALNT9  | 0.44  |
| hsa-mir-132 | GALNTL5 | 0.61  |
| hsa-mir-132 | GDA     | 0.49  |
| hsa-mir-132 | GLS2    | 0.56  |
| hsa-mir-132 | GLT1D1  | 0.56  |
| hsa-mir-132 | GNG3    | 0.48  |
| hsa-mir-132 | GOT1    | 0.56  |
| hsa-mir-132 | GPR22   | 0.55  |
| hsa-mir-132 | GPR26   | 0.53  |
| hsa-mir-132 | GPRASP2 | 0.45  |
| hsa-mir-132 | GREM2   | 0.63  |
| hsa-mir-132 | HCN1    | 0.61  |

|             |           |       |
|-------------|-----------|-------|
| hsa-mir-132 | HOMER1    | 0.38  |
| hsa-mir-132 | HS6ST3    | 0.54  |
| hsa-mir-132 | HTR2A     | 0.5   |
| hsa-mir-132 | HTR2C     | 0.58  |
| hsa-mir-132 | HTR5A     | 0.59  |
| hsa-mir-132 | ICAM5     | 0.6   |
| hsa-mir-132 | INA       | 0.46  |
| hsa-mir-132 | INPP5F    | 0.53  |
| hsa-mir-132 | KCNA1     | 0.44  |
| hsa-mir-132 | KCNA4     | 0.5   |
| hsa-mir-132 | KCNB2     | 0.51  |
| hsa-mir-132 | KCNC2     | 0.53  |
| hsa-mir-132 | KCNMA1    | 0.51  |
| hsa-mir-132 | KCNV1     | 0.61  |
| hsa-mir-132 | KHDRBS2   | 0.5   |
| hsa-mir-132 | KIAA0748  | 0.52  |
| hsa-mir-132 | KIAA0774  | 0.55  |
| hsa-mir-132 | KIAA1045  | 0.52  |
| hsa-mir-132 | KIAA1239  | 0.59  |
| hsa-mir-132 | KIAA1622  | 0.53  |
| hsa-mir-132 | KLHL1     | 0.52  |
| hsa-mir-132 | KRT222P   | 0.59  |
| hsa-mir-132 | LHX6      | 0.5   |
| hsa-mir-132 | LINGO1    | 0.37  |
| hsa-mir-132 | LOC400120 | 0.6   |
| hsa-mir-132 | LRFN5     | 0.53  |
| hsa-mir-132 | LRTM2     | 0.55  |
| hsa-mir-132 | MAL2      | 0.5   |
| hsa-mir-132 | MAP7D2    | 0.57  |
| hsa-mir-132 | MDH1      | 0.5   |
| hsa-mir-132 | MEPE      | 0.5   |
| hsa-mir-132 | MORC4     | -0.51 |
| hsa-mir-132 | MUM1L1    | 0.42  |
| hsa-mir-132 | NAPB      | 0.56  |
| hsa-mir-132 | NDUFB8    | 0.49  |
| hsa-mir-132 | NEFH      | 0.48  |
| hsa-mir-132 | NEFL      | 0.51  |
| hsa-mir-132 | NEFM      | 0.56  |
| hsa-mir-132 | NEURL     | 0.61  |
| hsa-mir-132 | NEUROD6   | 0.5   |
| hsa-mir-132 | NGEF      | 0.47  |
| hsa-mir-132 | NPM2      | 0.55  |
| hsa-mir-132 | NPTX1     | 0.45  |
| hsa-mir-132 | NPTXR     | 0.5   |
| hsa-mir-132 | NRGN      | 0.56  |
| hsa-mir-132 | NY-REN-7  | 0.6   |
| hsa-mir-132 | OCA2      | 0.49  |
| hsa-mir-132 | OPRK1     | 0.46  |
| hsa-mir-132 | PACSN1    | 0.58  |
| hsa-mir-132 | PDYN      | 0.52  |
| hsa-mir-132 | PGBD5     | 0.43  |
| hsa-mir-132 | PHYHIP    | 0.54  |
| hsa-mir-132 | PIP3-E    | 0.53  |

|             |            |      |
|-------------|------------|------|
| hsa-mir-132 | PNOC       | 0.48 |
| hsa-mir-132 | PPP2R2C    | 0.51 |
| hsa-mir-132 | PRKCB1     | 0.53 |
| hsa-mir-132 | PRMT8      | 0.53 |
| hsa-mir-132 | PRSS3      | 0.51 |
| hsa-mir-132 | PTPN5      | 0.56 |
| hsa-mir-132 | PTPRR      | 0.46 |
| hsa-mir-132 | RASAL1     | 0.53 |
| hsa-mir-132 | RFPL2      | 0.54 |
| hsa-mir-132 | RGS4       | 0.47 |
| hsa-mir-132 | RICH2      | 0.55 |
| hsa-mir-132 | RIMBP2     | 0.55 |
| hsa-mir-132 | RSPO2      | 0.48 |
| hsa-mir-132 | RTN4RL1    | 0.57 |
| hsa-mir-132 | RYR2       | 0.59 |
| hsa-mir-132 | SH2D5      | 0.52 |
| hsa-mir-132 | SLC12A5    | 0.58 |
| hsa-mir-132 | SLC17A7    | 0.59 |
| hsa-mir-132 | SLC30A3    | 0.53 |
| hsa-mir-132 | SLC32A1    | 0.5  |
| hsa-mir-132 | SLC35F3    | 0.59 |
| hsa-mir-132 | SLITRK4    | 0.44 |
| hsa-mir-132 | SMPX       | 0.57 |
| hsa-mir-132 | SNAP25     | 0.45 |
| hsa-mir-132 | SNAP91     | 0.49 |
| hsa-mir-132 | SNCA       | 0.53 |
| hsa-mir-132 | SNCG       | 0.56 |
| hsa-mir-132 | SOHLH1     | 0.59 |
| hsa-mir-132 | SST        | 0.5  |
| hsa-mir-132 | ST6GALNAC5 | 0.35 |
| hsa-mir-132 | ST8SIA3    | 0.42 |
| hsa-mir-132 | STX1A      | 0.54 |
| hsa-mir-132 | STYK1      | 0.54 |
| hsa-mir-132 | SULT4A1    | 0.62 |
| hsa-mir-132 | SV2B       | 0.49 |
| hsa-mir-132 | SV2C       | 0.45 |
| hsa-mir-132 | SYNPR      | 0.44 |
| hsa-mir-132 | SYT1       | 0.54 |
| hsa-mir-132 | SYT13      | 0.51 |
| hsa-mir-132 | SYT5       | 0.61 |
| hsa-mir-132 | TAC1       | 0.46 |
| hsa-mir-132 | TCERG1L    | 0.52 |
| hsa-mir-132 | TMEM155    | 0.56 |
| hsa-mir-132 | TMEM16C    | 0.5  |
| hsa-mir-132 | TNRC4      | 0.44 |
| hsa-mir-132 | TSPYL5     | 0.38 |
| hsa-mir-132 | TUBB2A     | 0.5  |
| hsa-mir-132 | VIP        | 0.53 |
| hsa-mir-132 | VSNL1      | 0.52 |
| hsa-mir-132 | WBSCR17    | 0.44 |
| hsa-mir-132 | WNT10B     | 0.6  |
| hsa-mir-132 | WSCD2      | 0.5  |
| hsa-mir-132 | ZNF365     | 0.47 |

|              |             |       |
|--------------|-------------|-------|
| hsa-mir-134  | C4orf12     | -0.25 |
| hsa-mir-134  | C6orf105    | 0.32  |
| hsa-mir-134  | COMP        | -0.06 |
| hsa-mir-134  | DGAT2       | 0.28  |
| hsa-mir-134  | EFHC2       | -0.16 |
| hsa-mir-134  | FAM80B      | -0.3  |
| hsa-mir-134  | FGL1        | 0.15  |
| hsa-mir-134  | HAS2        | 0.19  |
| hsa-mir-134  | LRP4        | -0.3  |
| hsa-mir-134  | PKP2        | 0.23  |
| hsa-mir-134  | SCGB1D2     | -0.27 |
| hsa-mir-134  | SFRP2       | 0.27  |
| hsa-mir-134  | SLPI        | 0.22  |
| hsa-mir-134  | TM4SF1      | 0.23  |
| hsa-mir-134  | TRH         | 0.15  |
| hsa-mir-134  | TTR         | -0.02 |
| hsa-mir-135a | AGXT2L1     | 0.18  |
| hsa-mir-135a | ALDH1A3     | -0.23 |
| hsa-mir-135a | ARMC4       | 0.25  |
| hsa-mir-135a | ARRB1       | -0.37 |
| hsa-mir-135a | BMP5        | -0.22 |
| hsa-mir-135a | C10orf65    | 0.38  |
| hsa-mir-135a | C10orf79    | 0.44  |
| hsa-mir-135a | C12orf28    | -0.11 |
| hsa-mir-135a | C1orf192    | 0.36  |
| hsa-mir-135a | C20orf26    | 0.39  |
| hsa-mir-135a | C21orf82    | 0.39  |
| hsa-mir-135a | C4orf31     | 0.28  |
| hsa-mir-135a | C6orf118    | 0.32  |
| hsa-mir-135a | C9orf18     | 0.37  |
| hsa-mir-135a | C9orf58     | -0.12 |
| hsa-mir-135a | C9orf61     | 0.32  |
| hsa-mir-135a | CASC1       | 0.47  |
| hsa-mir-135a | CCDC135     | 0.39  |
| hsa-mir-135a | CCDC37      | 0.34  |
| hsa-mir-135a | CCDC65      | 0.39  |
| hsa-mir-135a | CCDC81      | 0.45  |
| hsa-mir-135a | CDH19       | -0.24 |
| hsa-mir-135a | CHST9       | 0.35  |
| hsa-mir-135a | COL13A1     | -0.27 |
| hsa-mir-135a | COL4A4      | 0.31  |
| hsa-mir-135a | COMP        | 0.25  |
| hsa-mir-135a | CORO2A      | -0.33 |
| hsa-mir-135a | DAO         | 0.26  |
| hsa-mir-135a | DCDC5       | 0.5   |
| hsa-mir-135a | DKFZp666G05 | 0.32  |
| hsa-mir-135a | DLEC1       | 0.45  |
| hsa-mir-135a | DNAH7       | 0.48  |
| hsa-mir-135a | DNER        | 0.2   |
| hsa-mir-135a | DSCR10      | -0.01 |
| hsa-mir-135a | DYNLRB2     | 0.35  |
| hsa-mir-135a | EFHC1       | 0.35  |
| hsa-mir-135a | EGFR        | 0.26  |

|              |          |       |
|--------------|----------|-------|
| hsa-mir-135a | EN1      | 0.11  |
| hsa-mir-135a | ERBB4    | 0.32  |
| hsa-mir-135a | EXPH5    | 0.38  |
| hsa-mir-135a | EYA4     | -0.01 |
| hsa-mir-135a | FAM80B   | 0.37  |
| hsa-mir-135a | FAM81B   | 0.31  |
| hsa-mir-135a | FREM1    | 0.21  |
| hsa-mir-135a | GAS7     | -0.04 |
| hsa-mir-135a | HIF3A    | 0.38  |
| hsa-mir-135a | INSL5    | 0.38  |
| hsa-mir-135a | IQUB     | 0.47  |
| hsa-mir-135a | KCND2    | 0.18  |
| hsa-mir-135a | KCNJ16   | 0.17  |
| hsa-mir-135a | KIAA1505 | 0.46  |
| hsa-mir-135a | KIF6     | 0.14  |
| hsa-mir-135a | KIRREL3  | 0.16  |
| hsa-mir-135a | LIFR     | 0.28  |
| hsa-mir-135a | LRRC34   | 0.25  |
| hsa-mir-135a | LRRC48   | 0.45  |
| hsa-mir-135a | LRRC51   | 0.4   |
| hsa-mir-135a | MAGEC2   | -0.17 |
| hsa-mir-135a | MSTN     | 0.28  |
| hsa-mir-135a | PARD3B   | 0.38  |
| hsa-mir-135a | PEX6     | 0.18  |
| hsa-mir-135a | PHLDA2   | -0.37 |
| hsa-mir-135a | PI16     | 0.32  |
| hsa-mir-135a | POSTN    | -0.19 |
| hsa-mir-135a | PRDM13   | 0.07  |
| hsa-mir-135a | PRDM16   | 0.26  |
| hsa-mir-135a | RGS9     | 0.37  |
| hsa-mir-135a | RIBC1    | 0.47  |
| hsa-mir-135a | RSHL3    | 0.46  |
| hsa-mir-135a | RSPH1    | 0.41  |
| hsa-mir-135a | SALL3    | 0.23  |
| hsa-mir-135a | SCGB1D1  | 0.33  |
| hsa-mir-135a | SCGB1D2  | 0.33  |
| hsa-mir-135a | SELT     | -0.16 |
| hsa-mir-135a | SERPINI2 | 0.45  |
| hsa-mir-135a | SHB      | -0.23 |
| hsa-mir-135a | SLC30A10 | 0.13  |
| hsa-mir-135a | SLCO1C1  | 0.22  |
| hsa-mir-135a | SOHLH2   | 0.28  |
| hsa-mir-135a | SP8      | 0.22  |
| hsa-mir-135a | SPAG8    | 0.4   |
| hsa-mir-135a | STK33    | 0.4   |
| hsa-mir-135a | TEKT1    | 0.39  |
| hsa-mir-135a | TFPI2    | -0.17 |
| hsa-mir-135a | TKTL1    | 0.25  |
| hsa-mir-135a | TM4SF1   | -0.38 |
| hsa-mir-135a | TMEM27   | 0.23  |
| hsa-mir-135a | TMPRSS3  | -0.04 |
| hsa-mir-135a | TNMD     | 0.17  |
| hsa-mir-135a | TRPM8    | -0.09 |

|              |          |       |
|--------------|----------|-------|
| hsa-mir-135a | TSNAXIP1 | 0.41  |
| hsa-mir-135a | TTC18    | 0.41  |
| hsa-mir-135a | TTC21A   | 0.37  |
| hsa-mir-135a | TTC29    | 0.41  |
| hsa-mir-135a | TTR      | -0.01 |
| hsa-mir-135a | VWA3A    | 0.35  |
| hsa-mir-135a | WDR49    | 0.41  |
| hsa-mir-135a | WDR52    | 0.24  |
| hsa-mir-135a | YSK4     | 0.38  |
| hsa-mir-135a | ZNF214   | 0.2   |
| hsa-mir-135a | ZNF540   | 0.2   |
| hsa-mir-135b | ARMC4    | 0.16  |
| hsa-mir-135b | C9orf68  | 0.42  |
| hsa-mir-135b | CHMP4C   | -0.13 |
| hsa-mir-135b | FAM83A   | -0.37 |
| hsa-mir-135b | GLRA3    | -0.32 |
| hsa-mir-135b | GYPB     | -0.38 |
| hsa-mir-135b | KLHL4    | 0.24  |
| hsa-mir-135b | LEMD1    | 0.51  |
| hsa-mir-135b | MAGEC1   | -0.33 |
| hsa-mir-135b | MAGEC2   | -0.12 |
| hsa-mir-135b | MUC15    | -0.31 |
| hsa-mir-135b | PCDHB12  | 0.28  |
| hsa-mir-135b | PDILT    | -0.38 |
| hsa-mir-135b | RPS6KA1  | -0.3  |
| hsa-mir-135b | SERPINB3 | -0.31 |
| hsa-mir-135b | SERPINB4 | -0.31 |
| hsa-mir-135b | SGK      | -0.24 |
| hsa-mir-135b | ZNF599   | 0.33  |
| hsa-mir-136  | March11  | 0.46  |
| hsa-mir-136  | BOK      | 0.42  |
| hsa-mir-136  | C9orf62  | 0.18  |
| hsa-mir-136  | CBX6     | 0.41  |
| hsa-mir-136  | CCKBR    | 0.5   |
| hsa-mir-136  | CDH18    | 0.39  |
| hsa-mir-136  | CDH9     | 0.46  |
| hsa-mir-136  | CHSY-2   | -0.06 |
| hsa-mir-136  | CLECL1   | -0.41 |
| hsa-mir-136  | CNTNAP2  | 0.42  |
| hsa-mir-136  | CREG2    | 0.37  |
| hsa-mir-136  | DLK1     | 0.2   |
| hsa-mir-136  | DRD5     | 0.37  |
| hsa-mir-136  | ENPP6    | 0.03  |
| hsa-mir-136  | ESX1     | 0.26  |
| hsa-mir-136  | FETUB    | 0.11  |
| hsa-mir-136  | FGF13    | 0.37  |
| hsa-mir-136  | FLJ34047 | 0.44  |
| hsa-mir-136  | FRAS1    | 0.32  |
| hsa-mir-136  | GABBR2   | 0.36  |
| hsa-mir-136  | GDA      | 0.44  |
| hsa-mir-136  | GREM2    | 0.45  |
| hsa-mir-136  | HCN1     | 0.41  |
| hsa-mir-136  | HLF      | 0.44  |



|             |             |      |
|-------------|-------------|------|
| hsa-mir-136 | HOOK1       | 0.47 |
| hsa-mir-136 | HOXB9       | 0.2  |
| hsa-mir-136 | HRNBP3      | 0.47 |
| hsa-mir-136 | HTR1E       | 0.46 |
| hsa-mir-136 | ICAM5       | 0.45 |
| hsa-mir-136 | INA         | 0.36 |
| hsa-mir-136 | KCNG3       | 0.42 |
| hsa-mir-136 | KCNK1       | 0.37 |
| hsa-mir-136 | KHDRBS2     | 0.34 |
| hsa-mir-136 | KIAA0774    | 0.47 |
| hsa-mir-136 | KIAA1086    | 0.54 |
| hsa-mir-136 | KLK7        | 0.44 |
| hsa-mir-136 | LIN28B      | 0.27 |
| hsa-mir-136 | 22NC03-75B3 | 0.49 |
| hsa-mir-136 | MAGEA8      | 0.29 |
| hsa-mir-136 | MAL2        | 0.39 |
| hsa-mir-136 | MEG3        | 0.58 |
| hsa-mir-136 | NEFM        | 0.41 |
| hsa-mir-136 | NEURL       | 0.49 |
| hsa-mir-136 | NGEF        | 0.46 |
| hsa-mir-136 | ODZ2        | 0.32 |
| hsa-mir-136 | PACSIN1     | 0.43 |
| hsa-mir-136 | PCLO        | 0.41 |
| hsa-mir-136 | PEG3        | 0.41 |
| hsa-mir-136 | PIAS4       | 0.33 |
| hsa-mir-136 | PLAC2       | 0.44 |
| hsa-mir-136 | PRKCB1      | 0.38 |
| hsa-mir-136 | PRSS1       | 0.45 |
| hsa-mir-136 | PRSS3       | 0.47 |
| hsa-mir-136 | RTN4RL1     | 0.44 |
| hsa-mir-136 | RYR2        | 0.47 |
| hsa-mir-136 | SERPINB3    | 0.24 |
| hsa-mir-136 | SHANK2      | 0.46 |
| hsa-mir-136 | SLC1A6      | 0.38 |
| hsa-mir-136 | SLC35F3     | 0.43 |
| hsa-mir-136 | SLITRK4     | 0.4  |
| hsa-mir-136 | SORBS2      | 0.31 |
| hsa-mir-136 | SPINK5      | 0.33 |
| hsa-mir-136 | SSTR1       | 0.45 |
| hsa-mir-136 | STK32C      | 0.47 |
| hsa-mir-136 | SULT4A1     | 0.48 |
| hsa-mir-136 | SYT13       | 0.39 |
| hsa-mir-136 | TCERG1L     | 0.46 |
| hsa-mir-136 | TPO         | 0.45 |
| hsa-mir-136 | VSNL1       | 0.36 |
| hsa-mir-136 | WBSCR17     | 0.39 |
| hsa-mir-137 | March4      | 0.64 |
| hsa-mir-137 | Sept5       | 0.63 |
| hsa-mir-137 | A2BP1       | 0.73 |
| hsa-mir-137 | ABCC12      | 0.62 |
| hsa-mir-137 | ABCG4       | 0.63 |
| hsa-mir-137 | ABHD12B     | 0.53 |
| hsa-mir-137 | ABLIM2      | 0.67 |

|             |           |      |
|-------------|-----------|------|
| hsa-mir-137 | ACTL6B    | 0.68 |
| hsa-mir-137 | ADCYAP1   | 0.6  |
| hsa-mir-137 | ADRA2A    | 0.33 |
| hsa-mir-137 | AK5       | 0.7  |
| hsa-mir-137 | AMPH      | 0.64 |
| hsa-mir-137 | ANK3      | 0.6  |
| hsa-mir-137 | ANKRD43   | 0.64 |
| hsa-mir-137 | ANKS1B    | 0.63 |
| hsa-mir-137 | ARHGDIG   | 0.68 |
| hsa-mir-137 | ARHGEF7   | 0.55 |
| hsa-mir-137 | ARPP-19   | 0.48 |
| hsa-mir-137 | ATP1B1    | 0.59 |
| hsa-mir-137 | ATP2B2    | 0.62 |
| hsa-mir-137 | ATP2B3    | 0.74 |
| hsa-mir-137 | ATP6V1G2  | 0.57 |
| hsa-mir-137 | ATP8A2    | 0.61 |
| hsa-mir-137 | ATRNL1    | 0.59 |
| hsa-mir-137 | B4GALT6   | 0.52 |
| hsa-mir-137 | BASP1     | 0.57 |
| hsa-mir-137 | BEGAIN    | 0.5  |
| hsa-mir-137 | BEX2      | 0.57 |
| hsa-mir-137 | BEX4      | 0.49 |
| hsa-mir-137 | BEX5      | 0.66 |
| hsa-mir-137 | BHLHB5    | 0.6  |
| hsa-mir-137 | BRUNOL4   | 0.73 |
| hsa-mir-137 | BRUNOL5   | 0.76 |
| hsa-mir-137 | BSN       | 0.65 |
| hsa-mir-137 | BZRAP1    | 0.52 |
| hsa-mir-137 | C10orf116 | 0.39 |
| hsa-mir-137 | C10orf35  | 0.53 |
| hsa-mir-137 | C13orf16  | 0.56 |
| hsa-mir-137 | C19orf30  | 0.64 |
| hsa-mir-137 | C1orf115  | 0.65 |
| hsa-mir-137 | C1orf173  | 0.43 |
| hsa-mir-137 | C1QL3     | 0.67 |
| hsa-mir-137 | C1QTNF4   | 0.64 |
| hsa-mir-137 | C20orf174 | 0.68 |
| hsa-mir-137 | C5orf40   | 0.64 |
| hsa-mir-137 | C6orf114  | 0.67 |
| hsa-mir-137 | C9orf164  | 0.57 |
| hsa-mir-137 | C9orf24   | 0.42 |
| hsa-mir-137 | C9orf4    | 0.67 |
| hsa-mir-137 | CA10      | 0.53 |
| hsa-mir-137 | CABP1     | 0.71 |
| hsa-mir-137 | CACNA2D2  | 0.44 |
| hsa-mir-137 | CACNA2D3  | 0.6  |
| hsa-mir-137 | CACNB1    | 0.71 |
| hsa-mir-137 | CACNG2    | 0.73 |
| hsa-mir-137 | CACNG3    | 0.75 |
| hsa-mir-137 | CALB2     | 0.58 |
| hsa-mir-137 | CAMK1G    | 0.61 |
| hsa-mir-137 | CAMK2A    | 0.69 |
| hsa-mir-137 | CAMKK1    | 0.66 |

|             |         |       |
|-------------|---------|-------|
| hsa-mir-137 | CAMKV   | 0.66  |
| hsa-mir-137 | CAP2    | 0.54  |
| hsa-mir-137 | CARTPT  | 0.66  |
| hsa-mir-137 | CBFA2T3 | 0.59  |
| hsa-mir-137 | CBLN2   | 0.65  |
| hsa-mir-137 | CCDC85A | 0.62  |
| hsa-mir-137 | CCK     | 0.58  |
| hsa-mir-137 | CCKBR   | 0.65  |
| hsa-mir-137 | CD200   | 0.54  |
| hsa-mir-137 | CDH15   | -0.32 |
| hsa-mir-137 | CDH18   | 0.6   |
| hsa-mir-137 | CDH22   | 0.53  |
| hsa-mir-137 | CDH8    | 0.74  |
| hsa-mir-137 | CDH9    | 0.58  |
| hsa-mir-137 | CDKL2   | 0.63  |
| hsa-mir-137 | CDKL5   | 0.67  |
| hsa-mir-137 | CDR1    | 0.51  |
| hsa-mir-137 | CENTA1  | 0.66  |
| hsa-mir-137 | CHD5    | 0.72  |
| hsa-mir-137 | CHGA    | 0.67  |
| hsa-mir-137 | CHGB    | 0.57  |
| hsa-mir-137 | CHN1    | 0.61  |
| hsa-mir-137 | CHRM2   | 0.39  |
| hsa-mir-137 | CHRN2   | 0.57  |
| hsa-mir-137 | CKMT1A  | 0.66  |
| hsa-mir-137 | CLCN4   | 0.61  |
| hsa-mir-137 | CLIC5   | 0.48  |
| hsa-mir-137 | CLTB    | 0.69  |
| hsa-mir-137 | CNKSR2  | 0.74  |
| hsa-mir-137 | CNTN3   | 0.64  |
| hsa-mir-137 | CNTN4   | 0.69  |
| hsa-mir-137 | CNTN6   | 0.61  |
| hsa-mir-137 | CPEB3   | 0.69  |
| hsa-mir-137 | CPLX1   | 0.65  |
| hsa-mir-137 | CPLX2   | 0.72  |
| hsa-mir-137 | CPLX3   | 0.68  |
| hsa-mir-137 | CPNE6   | 0.64  |
| hsa-mir-137 | CREG2   | 0.66  |
| hsa-mir-137 | CRHBP   | 0.62  |
| hsa-mir-137 | CRTAC1  | 0.62  |
| hsa-mir-137 | CRYM    | 0.61  |
| hsa-mir-137 | CTXN3   | 0.65  |
| hsa-mir-137 | CUTL2   | 0.64  |
| hsa-mir-137 | CYP4X1  | 0.7   |
| hsa-mir-137 | CYP7B1  | 0.4   |
| hsa-mir-137 | DACH2   | 0.68  |
| hsa-mir-137 | DBC1    | 0.56  |
| hsa-mir-137 | DGKZ    | 0.44  |
| hsa-mir-137 | DLEU7   | 0.63  |
| hsa-mir-137 | DLG2    | 0.67  |
| hsa-mir-137 | DLGAP2  | 0.74  |
| hsa-mir-137 | DNAJC6  | 0.69  |
| hsa-mir-137 | DNM1    | 0.72  |

|             |           |       |
|-------------|-----------|-------|
| hsa-mir-137 | DNM3      | 0.57  |
| hsa-mir-137 | DOC2A     | 0.72  |
| hsa-mir-137 | DRD1      | 0.69  |
| hsa-mir-137 | DRD1IP    | 0.73  |
| hsa-mir-137 | DUSP26    | 0.47  |
| hsa-mir-137 | DUSP8     | 0.52  |
| hsa-mir-137 | DYNC111   | 0.59  |
| hsa-mir-137 | EDIL3     | 0.58  |
| hsa-mir-137 | EFHA2     | 0.64  |
| hsa-mir-137 | ENTPD3    | 0.56  |
| hsa-mir-137 | EPB49     | 0.68  |
| hsa-mir-137 | EPHA10    | 0.67  |
| hsa-mir-137 | EPHB6     | 0.59  |
| hsa-mir-137 | ERC2      | 0.72  |
| hsa-mir-137 | EYA3      | -0.41 |
| hsa-mir-137 | FABP6     | 0.52  |
| hsa-mir-137 | FAM19A1   | 0.63  |
| hsa-mir-137 | FAM19A2   | 0.72  |
| hsa-mir-137 | FBXL16    | 0.62  |
| hsa-mir-137 | FBXO2     | 0.52  |
| hsa-mir-137 | FBXO40    | 0.62  |
| hsa-mir-137 | FBXO41    | 0.66  |
| hsa-mir-137 | FEZF2     | 0.57  |
| hsa-mir-137 | FGF13     | 0.55  |
| hsa-mir-137 | FKBP10    | -0.45 |
| hsa-mir-137 | FLJ33534  | 0.63  |
| hsa-mir-137 | FLJ37464  | 0.66  |
| hsa-mir-137 | FRMPD4    | 0.72  |
| hsa-mir-137 | FSTL5     | 0.61  |
| hsa-mir-137 | FUT9      | 0.52  |
| hsa-mir-137 | FXVD7     | 0.54  |
| hsa-mir-137 | GABARAPL1 | 0.55  |
| hsa-mir-137 | GABARAPL3 | 0.6   |
| hsa-mir-137 | GABRA1    | 0.69  |
| hsa-mir-137 | GABRA2    | 0.6   |
| hsa-mir-137 | GABRA4    | 0.65  |
| hsa-mir-137 | GABRA5    | 0.68  |
| hsa-mir-137 | GABRB3    | 0.56  |
| hsa-mir-137 | GABRG1    | 0.65  |
| hsa-mir-137 | GABRG2    | 0.68  |
| hsa-mir-137 | GAD2      | 0.64  |
| hsa-mir-137 | GALNTL5   | 0.67  |
| hsa-mir-137 | GAST      | 0.63  |
| hsa-mir-137 | GFRA2     | 0.48  |
| hsa-mir-137 | GJB6      | 0.62  |
| hsa-mir-137 | GLS2      | 0.63  |
| hsa-mir-137 | GLT1D1    | 0.65  |
| hsa-mir-137 | GNAO1     | 0.66  |
| hsa-mir-137 | GNG3      | 0.7   |
| hsa-mir-137 | GPR22     | 0.66  |
| hsa-mir-137 | GPR26     | 0.64  |
| hsa-mir-137 | GPRASP1   | 0.56  |
| hsa-mir-137 | GPRASP2   | 0.63  |

|             |          |      |
|-------------|----------|------|
| hsa-mir-137 | GRIN2B   | 0.62 |
| hsa-mir-137 | GRIN3A   | 0.76 |
| hsa-mir-137 | GRM1     | 0.67 |
| hsa-mir-137 | GRM3     | 0.55 |
| hsa-mir-137 | GRM5     | 0.67 |
| hsa-mir-137 | GRM7     | 0.68 |
| hsa-mir-137 | GRP      | 0.53 |
| hsa-mir-137 | HCN1     | 0.68 |
| hsa-mir-137 | HECW1    | 0.69 |
| hsa-mir-137 | HMGCLL1  | 0.56 |
| hsa-mir-137 | HMP19    | 0.6  |
| hsa-mir-137 | HPCAL4   | 0.68 |
| hsa-mir-137 | HRNBP3   | 0.68 |
| hsa-mir-137 | HS3ST2   | 0.59 |
| hsa-mir-137 | HS3ST4   | 0.67 |
| hsa-mir-137 | HS3ST5   | 0.44 |
| hsa-mir-137 | HS6ST3   | 0.66 |
| hsa-mir-137 | HSPA12A  | 0.63 |
| hsa-mir-137 | HSPB3    | 0.52 |
| hsa-mir-137 | HTR1E    | 0.56 |
| hsa-mir-137 | HTR2A    | 0.63 |
| hsa-mir-137 | HTR5A    | 0.68 |
| hsa-mir-137 | IL1RAPL1 | 0.57 |
| hsa-mir-137 | INA      | 0.6  |
| hsa-mir-137 | INPP5F   | 0.6  |
| hsa-mir-137 | INSM2    | 0.61 |
| hsa-mir-137 | ISLR2    | 0.57 |
| hsa-mir-137 | ITPR1    | 0.47 |
| hsa-mir-137 | JAKMIP1  | 0.63 |
| hsa-mir-137 | JPH3     | 0.66 |
| hsa-mir-137 | KALRN    | 0.73 |
| hsa-mir-137 | KCNA1    | 0.59 |
| hsa-mir-137 | KCNA4    | 0.65 |
| hsa-mir-137 | KCNA5    | 0.5  |
| hsa-mir-137 | KCNB2    | 0.73 |
| hsa-mir-137 | KCNC2    | 0.72 |
| hsa-mir-137 | KCNC3    | 0.61 |
| hsa-mir-137 | KCNH3    | 0.66 |
| hsa-mir-137 | KCNJ12   | 0.66 |
| hsa-mir-137 | KCNJ3    | 0.57 |
| hsa-mir-137 | KCNK1    | 0.62 |
| hsa-mir-137 | KCNN1    | 0.59 |
| hsa-mir-137 | KCNS1    | 0.6  |
| hsa-mir-137 | KCNV1    | 0.68 |
| hsa-mir-137 | KCTD16   | 0.72 |
| hsa-mir-137 | KCTD4    | 0.61 |
| hsa-mir-137 | KHDRBS2  | 0.57 |
| hsa-mir-137 | KIAA0319 | 0.62 |
| hsa-mir-137 | KIAA0513 | 0.68 |
| hsa-mir-137 | KIAA0574 | 0.5  |
| hsa-mir-137 | KIAA0748 | 0.62 |
| hsa-mir-137 | KIAA0774 | 0.63 |
| hsa-mir-137 | KIAA1045 | 0.62 |

|             |           |      |
|-------------|-----------|------|
| hsa-mir-137 | KIAA1107  | 0.72 |
| hsa-mir-137 | KIAA1239  | 0.74 |
| hsa-mir-137 | KIAA1324  | 0.57 |
| hsa-mir-137 | KIAA1622  | 0.6  |
| hsa-mir-137 | KIAA1853  | 0.74 |
| hsa-mir-137 | KIF3A     | 0.51 |
| hsa-mir-137 | KIF5A     | 0.71 |
| hsa-mir-137 | KIF5C     | 0.6  |
| hsa-mir-137 | KIRREL3   | 0.54 |
| hsa-mir-137 | KLHL1     | 0.67 |
| hsa-mir-137 | KLHL2     | 0.56 |
| hsa-mir-137 | KLHL32    | 0.57 |
| hsa-mir-137 | KRT222P   | 0.7  |
| hsa-mir-137 | KSR2      | 0.66 |
| hsa-mir-137 | LINGO2    | 0.57 |
| hsa-mir-137 | LOC339524 | 0.67 |
| hsa-mir-137 | LOC399947 | 0.61 |
| hsa-mir-137 | LOC400120 | 0.69 |
| hsa-mir-137 | LOC554175 | 0.7  |
| hsa-mir-137 | LRFN2     | 0.67 |
| hsa-mir-137 | LRFN5     | 0.64 |
| hsa-mir-137 | LRRC7     | 0.71 |
| hsa-mir-137 | LRRC8B    | 0.53 |
| hsa-mir-137 | LRTM2     | 0.73 |
| hsa-mir-137 | LY6H      | 0.6  |
| hsa-mir-137 | MAGEE1    | 0.63 |
| hsa-mir-137 | MAL2      | 0.6  |
| hsa-mir-137 | MAP7D2    | 0.67 |
| hsa-mir-137 | MAPK8IP2  | 0.69 |
| hsa-mir-137 | MAPRE3    | 0.6  |
| hsa-mir-137 | MAST3     | 0.66 |
| hsa-mir-137 | MCHR2     | 0.71 |
| hsa-mir-137 | MEF2C     | 0.57 |
| hsa-mir-137 | MFSD4     | 0.69 |
| hsa-mir-137 | MGC39606  | 0.6  |
| hsa-mir-137 | MICAL2    | 0.68 |
| hsa-mir-137 | MTMR7     | 0.59 |
| hsa-mir-137 | MUM1L1    | 0.53 |
| hsa-mir-137 | MYCBP2    | 0.58 |
| hsa-mir-137 | MYRIP     | 0.57 |
| hsa-mir-137 | MYT1L     | 0.78 |
| hsa-mir-137 | NAP1L2    | 0.59 |
| hsa-mir-137 | NAP1L3    | 0.64 |
| hsa-mir-137 | NAPB      | 0.71 |
| hsa-mir-137 | NAV3      | 0.53 |
| hsa-mir-137 | NCDN      | 0.7  |
| hsa-mir-137 | NCOA7     | 0.55 |
| hsa-mir-137 | NDUFB8    | 0.62 |
| hsa-mir-137 | NEFH      | 0.58 |
| hsa-mir-137 | NEFL      | 0.57 |
| hsa-mir-137 | NEFM      | 0.63 |
| hsa-mir-137 | NEGR1     | 0.63 |
| hsa-mir-137 | NELL1     | 0.64 |

|             |          |      |
|-------------|----------|------|
| hsa-mir-137 | NEURL    | 0.68 |
| hsa-mir-137 | NEUROD2  | 0.69 |
| hsa-mir-137 | NEUROD6  | 0.72 |
| hsa-mir-137 | NGB      | 0.61 |
| hsa-mir-137 | NGEF     | 0.55 |
| hsa-mir-137 | NKAPL    | 0.44 |
| hsa-mir-137 | NMNAT2   | 0.68 |
| hsa-mir-137 | NPM2     | 0.69 |
| hsa-mir-137 | NPTXR    | 0.56 |
| hsa-mir-137 | NPY      | 0.5  |
| hsa-mir-137 | NPY1R    | 0.53 |
| hsa-mir-137 | NRG3     | 0.58 |
| hsa-mir-137 | NRGN     | 0.64 |
| hsa-mir-137 | NRSN1    | 0.66 |
| hsa-mir-137 | NRXN3    | 0.57 |
| hsa-mir-137 | NSF      | 0.71 |
| hsa-mir-137 | NUDT10   | 0.38 |
| hsa-mir-137 | NY-REN-7 | 0.69 |
| hsa-mir-137 | OLFM1    | 0.53 |
| hsa-mir-137 | OLFM3    | 0.7  |
| hsa-mir-137 | OPCML    | 0.57 |
| hsa-mir-137 | OPRK1    | 0.56 |
| hsa-mir-137 | OR2L13   | 0.63 |
| hsa-mir-137 | OXGR1    | 0.55 |
| hsa-mir-137 | PACSN1   | 0.68 |
| hsa-mir-137 | PAK3     | 0.64 |
| hsa-mir-137 | PAK7     | 0.6  |
| hsa-mir-137 | PCLO     | 0.67 |
| hsa-mir-137 | PCSK2    | 0.61 |
| hsa-mir-137 | PDE1B    | 0.65 |
| hsa-mir-137 | PDYN     | 0.51 |
| hsa-mir-137 | PEG3     | 0.5  |
| hsa-mir-137 | PGBD5    | 0.52 |
| hsa-mir-137 | PHACTR1  | 0.48 |
| hsa-mir-137 | PHYHIP   | 0.68 |
| hsa-mir-137 | PIP3-E   | 0.65 |
| hsa-mir-137 | PLEKHA1  | 0.66 |
| hsa-mir-137 | PNMA3    | 0.59 |
| hsa-mir-137 | PNMA5    | 0.66 |
| hsa-mir-137 | POU6F2   | 0.38 |
| hsa-mir-137 | PPFIA2   | 0.57 |
| hsa-mir-137 | PPFIA4   | 0.47 |
| hsa-mir-137 | PPM1H    | 0.63 |
| hsa-mir-137 | PPP1R16B | 0.7  |
| hsa-mir-137 | PPP2R2C  | 0.63 |
| hsa-mir-137 | PRB1     | 0.36 |
| hsa-mir-137 | PRKAR2B  | 0.49 |
| hsa-mir-137 | PRKCB1   | 0.6  |
| hsa-mir-137 | PRMT8    | 0.73 |
| hsa-mir-137 | PRRT1    | 0.68 |
| hsa-mir-137 | PSD      | 0.73 |
| hsa-mir-137 | PSD3     | 0.63 |
| hsa-mir-137 | PTH2R    | 0.61 |

|             |           |      |
|-------------|-----------|------|
| hsa-mir-137 | PTPN5     | 0.57 |
| hsa-mir-137 | PTPRN     | 0.58 |
| hsa-mir-137 | PTPRT     | 0.55 |
| hsa-mir-137 | RAB11FIP4 | 0.69 |
| hsa-mir-137 | RAB26     | 0.44 |
| hsa-mir-137 | RAB3A     | 0.65 |
| hsa-mir-137 | RAB40B    | 0.68 |
| hsa-mir-137 | RALYL     | 0.5  |
| hsa-mir-137 | RAPGEF4   | 0.57 |
| hsa-mir-137 | RASGEF1A  | 0.52 |
| hsa-mir-137 | RDHE2     | 0.6  |
| hsa-mir-137 | RFPL1     | 0.71 |
| hsa-mir-137 | RFPL2     | 0.68 |
| hsa-mir-137 | RFPL3     | 0.72 |
| hsa-mir-137 | RGS4      | 0.54 |
| hsa-mir-137 | RGS7      | 0.61 |
| hsa-mir-137 | RGS7BP    | 0.61 |
| hsa-mir-137 | RICH2     | 0.66 |
| hsa-mir-137 | RIMBP2    | 0.7  |
| hsa-mir-137 | RIMS1     | 0.65 |
| hsa-mir-137 | RIMS2     | 0.7  |
| hsa-mir-137 | RIMS3     | 0.68 |
| hsa-mir-137 | RIT2      | 0.43 |
| hsa-mir-137 | RLBP1L2   | 0.44 |
| hsa-mir-137 | RPRML     | 0.48 |
| hsa-mir-137 | RSPO2     | 0.59 |
| hsa-mir-137 | RSPO3     | 0.61 |
| hsa-mir-137 | RTN1      | 0.47 |
| hsa-mir-137 | RTN4      | 0.55 |
| hsa-mir-137 | RTP1      | 0.53 |
| hsa-mir-137 | RUFY2     | 0.58 |
| hsa-mir-137 | RUNDC3A   | 0.7  |
| hsa-mir-137 | RYR2      | 0.68 |
| hsa-mir-137 | SCAMP5    | 0.61 |
| hsa-mir-137 | SCN1A     | 0.47 |
| hsa-mir-137 | SCN2A     | 0.71 |
| hsa-mir-137 | SCN2B     | 0.62 |
| hsa-mir-137 | SCN3B     | 0.69 |
| hsa-mir-137 | SCN8A     | 0.6  |
| hsa-mir-137 | SCN9A     | 0.46 |
| hsa-mir-137 | SEC14L5   | 0.62 |
| hsa-mir-137 | SERPINI1  | 0.6  |
| hsa-mir-137 | SGIP1     | 0.65 |
| hsa-mir-137 | SGSM1     | 0.69 |
| hsa-mir-137 | SH3GL2    | 0.58 |
| hsa-mir-137 | SH3GL3    | 0.6  |
| hsa-mir-137 | SHANK2    | 0.58 |
| hsa-mir-137 | SLC12A5   | 0.74 |
| hsa-mir-137 | SLC17A6   | 0.67 |
| hsa-mir-137 | SLC17A7   | 0.68 |
| hsa-mir-137 | SLC17A8   | 0.35 |
| hsa-mir-137 | SLC25A27  | 0.54 |
| hsa-mir-137 | SLC30A3   | 0.62 |



|             |          |      |
|-------------|----------|------|
| hsa-mir-137 | SLC32A1  | 0.58 |
| hsa-mir-137 | SLC35F3  | 0.68 |
| hsa-mir-137 | SLC39A12 | 0.48 |
| hsa-mir-137 | SLC4A10  | 0.64 |
| hsa-mir-137 | SLITRK1  | 0.64 |
| hsa-mir-137 | SLITRK4  | 0.55 |
| hsa-mir-137 | SMPX     | 0.61 |
| hsa-mir-137 | SNAP25   | 0.61 |
| hsa-mir-137 | SNAP91   | 0.72 |
| hsa-mir-137 | SNCA     | 0.63 |
| hsa-mir-137 | SNCB     | 0.61 |
| hsa-mir-137 | SNIP     | 0.62 |
| hsa-mir-137 | SOHLH1   | 0.65 |
| hsa-mir-137 | SPG3A    | 0.63 |
| hsa-mir-137 | SPOCK1   | 0.47 |
| hsa-mir-137 | SPOCK3   | 0.58 |
| hsa-mir-137 | SST      | 0.65 |
| hsa-mir-137 | SSTR2    | 0.61 |
| hsa-mir-137 | ST8SIA3  | 0.61 |
| hsa-mir-137 | STMN2    | 0.42 |
| hsa-mir-137 | STX1A    | 0.69 |
| hsa-mir-137 | STXBP1   | 0.72 |
| hsa-mir-137 | STXBP5   | 0.61 |
| hsa-mir-137 | STXBP5L  | 0.61 |
| hsa-mir-137 | STXBP6   | 0.54 |
| hsa-mir-137 | STYK1    | 0.67 |
| hsa-mir-137 | SULT4A1  | 0.67 |
| hsa-mir-137 | SV2B     | 0.64 |
| hsa-mir-137 | SV2C     | 0.6  |
| hsa-mir-137 | SYCE1    | 0.66 |
| hsa-mir-137 | SYN2     | 0.73 |
| hsa-mir-137 | SYNGR3   | 0.45 |
| hsa-mir-137 | SYNPR    | 0.65 |
| hsa-mir-137 | SYP      | 0.72 |
| hsa-mir-137 | SYT1     | 0.73 |
| hsa-mir-137 | SYT13    | 0.65 |
| hsa-mir-137 | SYT4     | 0.68 |
| hsa-mir-137 | SYT5     | 0.68 |
| hsa-mir-137 | TAC3     | 0.5  |
| hsa-mir-137 | TBC1D9   | 0.52 |
| hsa-mir-137 | TBR1     | 0.64 |
| hsa-mir-137 | TCBA1    | 0.61 |
| hsa-mir-137 | TCERG1L  | 0.61 |
| hsa-mir-137 | TMCC2    | 0.57 |
| hsa-mir-137 | TMEM10   | 0.66 |
| hsa-mir-137 | TMEM130  | 0.57 |
| hsa-mir-137 | TMEM151  | 0.62 |
| hsa-mir-137 | TMEM155  | 0.69 |
| hsa-mir-137 | TMEM16C  | 0.7  |
| hsa-mir-137 | TMEM16D  | 0.59 |
| hsa-mir-137 | TNRC4    | 0.69 |
| hsa-mir-137 | TPPP     | 0.64 |
| hsa-mir-137 | TSPYL1   | 0.62 |

|             |           |       |
|-------------|-----------|-------|
| hsa-mir-137 | TSPYL2    | 0.6   |
| hsa-mir-137 | TSPYL4    | 0.54  |
| hsa-mir-137 | TSPYL5    | 0.49  |
| hsa-mir-137 | TTC9B     | 0.56  |
| hsa-mir-137 | TUBA8     | 0.71  |
| hsa-mir-137 | UCHL1     | 0.49  |
| hsa-mir-137 | UNC13A    | 0.6   |
| hsa-mir-137 | UNC13C    | 0.58  |
| hsa-mir-137 | VAMP2     | 0.63  |
| hsa-mir-137 | VIP       | 0.69  |
| hsa-mir-137 | VSNL1     | 0.63  |
| hsa-mir-137 | VSTM2L    | 0.59  |
| hsa-mir-137 | WEE1      | -0.49 |
| hsa-mir-137 | WNT10B    | 0.61  |
| hsa-mir-137 | WSCD2     | 0.67  |
| hsa-mir-137 | YWHAH     | 0.62  |
| hsa-mir-137 | ZCCHC12   | 0.66  |
| hsa-mir-137 | ZNF365    | 0.62  |
| hsa-mir-137 | ZNF533    | 0.49  |
| hsa-mir-137 | ZNF536    | 0.52  |
| hsa-mir-137 | ZNF540    | 0.59  |
| hsa-mir-137 | ZNF702    | 0.51  |
| hsa-mir-138 | Sept3     | 0.55  |
| hsa-mir-138 | A2BP1     | 0.57  |
| hsa-mir-138 | ABCG4     | 0.5   |
| hsa-mir-138 | ADRA2C    | 0.54  |
| hsa-mir-138 | AFF2      | 0.46  |
| hsa-mir-138 | AGTPBP1   | 0.55  |
| hsa-mir-138 | AMPH      | 0.52  |
| hsa-mir-138 | ANKRD55   | 0.61  |
| hsa-mir-138 | ANKS1B    | 0.57  |
| hsa-mir-138 | APLP1     | 0.46  |
| hsa-mir-138 | ARPP-21   | 0.65  |
| hsa-mir-138 | ATCAY     | 0.62  |
| hsa-mir-138 | ATP10B    | 0.44  |
| hsa-mir-138 | ATP6V0A4  | 0.57  |
| hsa-mir-138 | ATP8A2    | 0.56  |
| hsa-mir-138 | ATRNL1    | 0.53  |
| hsa-mir-138 | B3GALT2   | 0.53  |
| hsa-mir-138 | BASP1     | 0.56  |
| hsa-mir-138 | BCAS1     | 0.58  |
| hsa-mir-138 | BCL11A    | 0.55  |
| hsa-mir-138 | BEX4      | 0.5   |
| hsa-mir-138 | BEX5      | 0.54  |
| hsa-mir-138 | BHLHB5    | 0.54  |
| hsa-mir-138 | BMPER     | 0.4   |
| hsa-mir-138 | BRUNOL4   | 0.59  |
| hsa-mir-138 | BRUNOL5   | 0.63  |
| hsa-mir-138 | C10orf35  | 0.45  |
| hsa-mir-138 | C11orf9   | 0.59  |
| hsa-mir-138 | C14orf132 | 0.49  |
| hsa-mir-138 | C20orf46  | 0.39  |
| hsa-mir-138 | C2orf32   | 0.5   |

|             |          |       |
|-------------|----------|-------|
| hsa-mir-138 | C6orf114 | 0.59  |
| hsa-mir-138 | C9orf125 | 0.54  |
| hsa-mir-138 | C9orf164 | 0.58  |
| hsa-mir-138 | C9orf4   | 0.56  |
| hsa-mir-138 | CA10     | 0.61  |
| hsa-mir-138 | CACNA2D3 | 0.46  |
| hsa-mir-138 | CALN1    | 0.53  |
| hsa-mir-138 | CAMKV    | 0.61  |
| hsa-mir-138 | CCDC85A  | 0.58  |
| hsa-mir-138 | CCK      | 0.47  |
| hsa-mir-138 | CCKBR    | 0.59  |
| hsa-mir-138 | CCNA1    | 0.36  |
| hsa-mir-138 | CDH12    | 0.59  |
| hsa-mir-138 | CDH13    | 0.5   |
| hsa-mir-138 | CDH18    | 0.6   |
| hsa-mir-138 | CDH19    | 0.32  |
| hsa-mir-138 | CDH8     | 0.64  |
| hsa-mir-138 | CDH9     | 0.55  |
| hsa-mir-138 | CKMT1A   | 0.61  |
| hsa-mir-138 | CLASP2   | 0.54  |
| hsa-mir-138 | CLCN4    | 0.46  |
| hsa-mir-138 | CNP      | 0.56  |
| hsa-mir-138 | CNTN3    | 0.6   |
| hsa-mir-138 | CNTNAP4  | 0.58  |
| hsa-mir-138 | CNTNAP5  | 0.52  |
| hsa-mir-138 | CSMD3    | 0.59  |
| hsa-mir-138 | CYP26B1  | 0.49  |
| hsa-mir-138 | CYP4X1   | 0.6   |
| hsa-mir-138 | DACH2    | 0.74  |
| hsa-mir-138 | DACT2    | 0.42  |
| hsa-mir-138 | DLEU7    | 0.59  |
| hsa-mir-138 | DLGAP1   | 0.33  |
| hsa-mir-138 | DLX6     | 0.37  |
| hsa-mir-138 | DNAJC6   | 0.6   |
| hsa-mir-138 | DNM3     | 0.61  |
| hsa-mir-138 | DOCK3    | 0.53  |
| hsa-mir-138 | DYNC111  | 0.62  |
| hsa-mir-138 | EGFR     | -0.39 |
| hsa-mir-138 | ELMO1    | 0.57  |
| hsa-mir-138 | ELOVL4   | 0.48  |
| hsa-mir-138 | ENPP2    | 0.52  |
| hsa-mir-138 | EPB41L4B | 0.48  |
| hsa-mir-138 | EPHA10   | 0.65  |
| hsa-mir-138 | ERC2     | 0.65  |
| hsa-mir-138 | EXTL1    | 0.64  |
| hsa-mir-138 | FA2H     | 0.61  |
| hsa-mir-138 | FAM131B  | 0.25  |
| hsa-mir-138 | FAM77C   | 0.47  |
| hsa-mir-138 | FBXL2    | 0.48  |
| hsa-mir-138 | FCHO1    | 0.53  |
| hsa-mir-138 | FEZF2    | 0.5   |
| hsa-mir-138 | FGF12    | 0.56  |
| hsa-mir-138 | FGF13    | 0.56  |

|             |          |       |
|-------------|----------|-------|
| hsa-mir-138 | FGF9     | 0.51  |
| hsa-mir-138 | FHOD3    | 0.45  |
| hsa-mir-138 | FREQ     | 0.53  |
| hsa-mir-138 | FRMPD4   | 0.57  |
| hsa-mir-138 | FSTL5    | 0.54  |
| hsa-mir-138 | FUT9     | 0.51  |
| hsa-mir-138 | FXVD7    | 0.54  |
| hsa-mir-138 | GABRA5   | 0.57  |
| hsa-mir-138 | GABRB3   | 0.53  |
| hsa-mir-138 | GABRG2   | 0.55  |
| hsa-mir-138 | GAL3ST1  | 0.57  |
| hsa-mir-138 | GDA      | 0.48  |
| hsa-mir-138 | GDF10    | 0.51  |
| hsa-mir-138 | GLRA3    | 0.51  |
| hsa-mir-138 | GLRB     | 0.47  |
| hsa-mir-138 | GLT1D1   | 0.54  |
| hsa-mir-138 | GNAI1    | 0.57  |
| hsa-mir-138 | GNAO1    | 0.55  |
| hsa-mir-138 | GPR155   | 0.46  |
| hsa-mir-138 | GPR17    | 0.54  |
| hsa-mir-138 | GPR85    | 0.45  |
| hsa-mir-138 | GREM2    | 0.52  |
| hsa-mir-138 | GRM3     | 0.45  |
| hsa-mir-138 | GUCA2B   | 0.56  |
| hsa-mir-138 | GUCY1B3  | 0.54  |
| hsa-mir-138 | HCN1     | 0.55  |
| hsa-mir-138 | HECW1    | 0.65  |
| hsa-mir-138 | HMGCLL1  | 0.51  |
| hsa-mir-138 | HPCAL4   | 0.56  |
| hsa-mir-138 | HS3ST4   | 0.56  |
| hsa-mir-138 | HS6ST3   | 0.54  |
| hsa-mir-138 | HSPA12A  | 0.65  |
| hsa-mir-138 | HSPB3    | 0.57  |
| hsa-mir-138 | HTR1E    | 0.52  |
| hsa-mir-138 | HTR2C    | 0.59  |
| hsa-mir-138 | IL1RAPL1 | 0.68  |
| hsa-mir-138 | INA      | 0.55  |
| hsa-mir-138 | INSM2    | 0.56  |
| hsa-mir-138 | IQGAP2   | -0.46 |
| hsa-mir-138 | JAKMIP1  | 0.54  |
| hsa-mir-138 | JPH3     | 0.63  |
| hsa-mir-138 | KCNA5    | 0.44  |
| hsa-mir-138 | KCNAB1   | 0.59  |
| hsa-mir-138 | KCNC3    | 0.47  |
| hsa-mir-138 | KCNIP3   | 0.53  |
| hsa-mir-138 | KCNJ12   | 0.54  |
| hsa-mir-138 | KCNK1    | 0.58  |
| hsa-mir-138 | KCNK2    | 0.46  |
| hsa-mir-138 | KCNS3    | 0.46  |
| hsa-mir-138 | KCTD16   | 0.61  |
| hsa-mir-138 | KIAA0748 | 0.53  |
| hsa-mir-138 | KIAA0774 | 0.54  |
| hsa-mir-138 | KIAA0984 | 0.47  |

|             |          |       |
|-------------|----------|-------|
| hsa-mir-138 | KIAA1045 | 0.49  |
| hsa-mir-138 | KIAA1086 | 0.53  |
| hsa-mir-138 | KIAA1128 | 0.52  |
| hsa-mir-138 | KIAA1622 | 0.55  |
| hsa-mir-138 | KIAA1957 | 0.56  |
| hsa-mir-138 | KIF1A    | 0.5   |
| hsa-mir-138 | KIF5A    | 0.62  |
| hsa-mir-138 | KLHL1    | 0.59  |
| hsa-mir-138 | KLK7     | 0.62  |
| hsa-mir-138 | KRT222P  | 0.59  |
| hsa-mir-138 | KSR2     | 0.6   |
| hsa-mir-138 | KY       | 0.53  |
| hsa-mir-138 | LARGE    | 0.56  |
| hsa-mir-138 | LHX6     | 0.52  |
| hsa-mir-138 | LINGO2   | 0.51  |
| hsa-mir-138 | LRFN2    | 0.62  |
| hsa-mir-138 | LRRC62   | 0.58  |
| hsa-mir-138 | LRRC7    | 0.69  |
| hsa-mir-138 | LRRC8B   | 0.55  |
| hsa-mir-138 | LRRTM1   | 0.51  |
| hsa-mir-138 | LRRTM4   | 0.55  |
| hsa-mir-138 | LY6H     | 0.47  |
| hsa-mir-138 | MAGEE1   | 0.55  |
| hsa-mir-138 | MAGEL2   | 0.51  |
| hsa-mir-138 | MAL2     | 0.45  |
| hsa-mir-138 | MBP      | 0.56  |
| hsa-mir-138 | MC4R     | 0.48  |
| hsa-mir-138 | MCF2     | 0.55  |
| hsa-mir-138 | MGC40499 | -0.48 |
| hsa-mir-138 | MGC42090 | 0.52  |
| hsa-mir-138 | MTMR7    | 0.59  |
| hsa-mir-138 | MYO5A    | 0.52  |
| hsa-mir-138 | MYT1L    | 0.61  |
| hsa-mir-138 | NAP1L3   | 0.58  |
| hsa-mir-138 | NBL1     | 0.42  |
| hsa-mir-138 | NEFM     | 0.51  |
| hsa-mir-138 | NELL1    | 0.5   |
| hsa-mir-138 | NETO1    | 0.58  |
| hsa-mir-138 | NEURL    | 0.59  |
| hsa-mir-138 | NEUROD2  | 0.55  |
| hsa-mir-138 | NGEF     | 0.52  |
| hsa-mir-138 | NMNAT2   | 0.56  |
| hsa-mir-138 | NOS2A    | -0.3  |
| hsa-mir-138 | NPM2     | 0.66  |
| hsa-mir-138 | NPY1R    | 0.53  |
| hsa-mir-138 | NPY5R    | 0.47  |
| hsa-mir-138 | NR0B1    | 0.48  |
| hsa-mir-138 | NRXN3    | 0.55  |
| hsa-mir-138 | NTN4     | 0.47  |
| hsa-mir-138 | NY-REN-7 | 0.55  |
| hsa-mir-138 | OCA2     | 0.5   |
| hsa-mir-138 | OLFM3    | 0.55  |
| hsa-mir-138 | OPCML    | 0.63  |

|             |           |      |
|-------------|-----------|------|
| hsa-mir-138 | OXGR1     | 0.52 |
| hsa-mir-138 | PAIP2B    | 0.57 |
| hsa-mir-138 | PAK3      | 0.62 |
| hsa-mir-138 | PAK7      | 0.65 |
| hsa-mir-138 | PCDH11Y   | 0.6  |
| hsa-mir-138 | PCDH7     | 0.49 |
| hsa-mir-138 | PCLO      | 0.59 |
| hsa-mir-138 | PCSK2     | 0.53 |
| hsa-mir-138 | PDE1A     | 0.45 |
| hsa-mir-138 | PEX5L     | 0.59 |
| hsa-mir-138 | PFN2      | 0.54 |
| hsa-mir-138 | PHACTR3   | 0.48 |
| hsa-mir-138 | PKNOX2    | 0.42 |
| hsa-mir-138 | PLCXD3    | 0.45 |
| hsa-mir-138 | PNMA5     | 0.62 |
| hsa-mir-138 | PPFIA2    | 0.52 |
| hsa-mir-138 | PPP1R16B  | 0.71 |
| hsa-mir-138 | PRKAR2B   | 0.56 |
| hsa-mir-138 | PRKCB1    | 0.47 |
| hsa-mir-138 | PRKCE     | 0.68 |
| hsa-mir-138 | PTH2R     | 0.58 |
| hsa-mir-138 | PTPRT     | 0.46 |
| hsa-mir-138 | RAB11FIP4 | 0.63 |
| hsa-mir-138 | RAB27B    | 0.45 |
| hsa-mir-138 | RAB33A    | 0.63 |
| hsa-mir-138 | RAB3A     | 0.69 |
| hsa-mir-138 | RAB3C     | 0.61 |
| hsa-mir-138 | RAI2      | 0.48 |
| hsa-mir-138 | RALYL     | 0.52 |
| hsa-mir-138 | RAPGEF2   | 0.58 |
| hsa-mir-138 | RAPGEF4   | 0.55 |
| hsa-mir-138 | RASGEF1C  | 0.61 |
| hsa-mir-138 | RBM11     | 0.57 |
| hsa-mir-138 | RDHE2     | 0.53 |
| hsa-mir-138 | REEP1     | 0.49 |
| hsa-mir-138 | RELN      | 0.49 |
| hsa-mir-138 | REPS2     | 0.63 |
| hsa-mir-138 | RIMBP2    | 0.57 |
| hsa-mir-138 | RIMS2     | 0.63 |
| hsa-mir-138 | RIMS3     | 0.65 |
| hsa-mir-138 | RIT2      | 0.38 |
| hsa-mir-138 | RNF150    | 0.52 |
| hsa-mir-138 | RTN4RL1   | 0.52 |
| hsa-mir-138 | RYR2      | 0.59 |
| hsa-mir-138 | SCARA5    | 0.4  |
| hsa-mir-138 | SCN3B     | 0.53 |
| hsa-mir-138 | SCN9A     | 0.51 |
| hsa-mir-138 | SEMA3D    | 0.52 |
| hsa-mir-138 | SFTPC     | 0.63 |
| hsa-mir-138 | SGSM1     | 0.59 |
| hsa-mir-138 | SH3GL2    | 0.57 |
| hsa-mir-138 | SH3GL3    | 0.64 |
| hsa-mir-138 | SHANK2    | 0.61 |

|             |         |      |
|-------------|---------|------|
| hsa-mir-138 | SKIP    | 0.53 |
| hsa-mir-138 | SLC17A6 | 0.56 |
| hsa-mir-138 | SLC1A1  | 0.58 |
| hsa-mir-138 | SLC1A6  | 0.48 |
| hsa-mir-138 | SLC30A3 | 0.53 |
| hsa-mir-138 | SLC35F3 | 0.65 |
| hsa-mir-138 | SLC44A1 | 0.35 |
| hsa-mir-138 | SLC7A14 | 0.59 |
| hsa-mir-138 | SLC8A3  | 0.6  |
| hsa-mir-138 | SLC9A2  | 0.36 |
| hsa-mir-138 | SLITRK1 | 0.63 |
| hsa-mir-138 | SLITRK4 | 0.53 |
| hsa-mir-138 | SMPX    | 0.52 |
| hsa-mir-138 | SNAP91  | 0.6  |
| hsa-mir-138 | SNIP    | 0.65 |
| hsa-mir-138 | SNTG2   | 0.42 |
| hsa-mir-138 | SOX10   | 0.58 |
| hsa-mir-138 | SSTR1   | 0.62 |
| hsa-mir-138 | ST8SIA3 | 0.56 |
| hsa-mir-138 | STAR    | 0.42 |
| hsa-mir-138 | STX1B   | 0.52 |
| hsa-mir-138 | STXBP1  | 0.63 |
| hsa-mir-138 | STXBP5L | 0.54 |
| hsa-mir-138 | STXBP6  | 0.56 |
| hsa-mir-138 | STYK1   | 0.56 |
| hsa-mir-138 | SUSD4   | 0.44 |
| hsa-mir-138 | SV2B    | 0.5  |
| hsa-mir-138 | SV2C    | 0.58 |
| hsa-mir-138 | SYN2    | 0.6  |
| hsa-mir-138 | SYN3    | 0.56 |
| hsa-mir-138 | SYT1    | 0.56 |
| hsa-mir-138 | SYT13   | 0.57 |
| hsa-mir-138 | TAC3    | 0.4  |
| hsa-mir-138 | TCBA1   | 0.57 |
| hsa-mir-138 | TCERG1L | 0.51 |
| hsa-mir-138 | TMEFF2  | 0.63 |
| hsa-mir-138 | TMEM16C | 0.72 |
| hsa-mir-138 | TMEM16D | 0.56 |
| hsa-mir-138 | TNRC4   | 0.61 |
| hsa-mir-138 | TPPP    | 0.61 |
| hsa-mir-138 | TSPYL1  | 0.51 |
| hsa-mir-138 | TTC9    | 0.49 |
| hsa-mir-138 | TUBA8   | 0.58 |
| hsa-mir-138 | UGT8    | 0.6  |
| hsa-mir-138 | UNC13C  | 0.56 |
| hsa-mir-138 | USP43   | 0.59 |
| hsa-mir-138 | VGFB    | 0.42 |
| hsa-mir-138 | VSNL1   | 0.43 |
| hsa-mir-138 | WASF1   | 0.63 |
| hsa-mir-138 | XK      | 0.46 |
| hsa-mir-138 | XKR4    | 0.5  |
| hsa-mir-138 | ZCCHC12 | 0.59 |
| hsa-mir-138 | ZEB2    | 0.43 |

|             |          |       |
|-------------|----------|-------|
| hsa-mir-138 | ZNF233   | 0.31  |
| hsa-mir-138 | ZNF25    | 0.45  |
| hsa-mir-138 | ZNF536   | 0.56  |
| hsa-mir-139 | March11  | 0.71  |
| hsa-mir-139 | A2BP1    | 0.72  |
| hsa-mir-139 | AASS     | -0.48 |
| hsa-mir-139 | AATK     | 0.7   |
| hsa-mir-139 | ABHD14A  | 0.49  |
| hsa-mir-139 | ABHD7    | 0.48  |
| hsa-mir-139 | ABLIM2   | 0.59  |
| hsa-mir-139 | ACTL6B   | 0.6   |
| hsa-mir-139 | ACTR3B   | 0.56  |
| hsa-mir-139 | ACVR1C   | 0.69  |
| hsa-mir-139 | ADAD2    | 0.64  |
| hsa-mir-139 | ADAM11   | 0.77  |
| hsa-mir-139 | ADAM9    | -0.52 |
| hsa-mir-139 | ADAMTS19 | 0.47  |
| hsa-mir-139 | ADARB2   | 0.55  |
| hsa-mir-139 | ADRA1B   | 0.63  |
| hsa-mir-139 | ADRA2C   | 0.62  |
| hsa-mir-139 | AEBP1    | -0.37 |
| hsa-mir-139 | AFAP1L1  | -0.44 |
| hsa-mir-139 | AFF2     | 0.53  |
| hsa-mir-139 | AGXT2L1  | 0.56  |
| hsa-mir-139 | AJAP1    | 0.6   |
| hsa-mir-139 | AK5      | 0.74  |
| hsa-mir-139 | AKAP11   | 0.6   |
| hsa-mir-139 | AKAP6    | 0.47  |
| hsa-mir-139 | AMN1     | 0.55  |
| hsa-mir-139 | AMPH     | 0.54  |
| hsa-mir-139 | ANGPT2   | -0.52 |
| hsa-mir-139 | ANK3     | 0.59  |
| hsa-mir-139 | ANKRD34  | 0.67  |
| hsa-mir-139 | ANKRD38  | 0.36  |
| hsa-mir-139 | ANKRD43  | 0.59  |
| hsa-mir-139 | ANXA5    | -0.57 |
| hsa-mir-139 | ARHGDIG  | 0.8   |
| hsa-mir-139 | ARHGEF7  | 0.61  |
| hsa-mir-139 | ARP11    | 0.45  |
| hsa-mir-139 | ARPP-21  | 0.65  |
| hsa-mir-139 | ASB2     | 0.48  |
| hsa-mir-139 | ATOH7    | 0.66  |
| hsa-mir-139 | ATP1B1   | 0.58  |
| hsa-mir-139 | ATP2B3   | 0.73  |
| hsa-mir-139 | ATP2C2   | 0.49  |
| hsa-mir-139 | ATP6V1E1 | 0.42  |
| hsa-mir-139 | ATP6V1G2 | 0.66  |
| hsa-mir-139 | ATP6V1H  | 0.6   |
| hsa-mir-139 | ATP8A2   | 0.68  |
| hsa-mir-139 | ATRNL1   | 0.58  |
| hsa-mir-139 | AUH      | 0.56  |
| hsa-mir-139 | B3GNT4   | 0.67  |
| hsa-mir-139 | BASP1    | 0.64  |



|             |           |       |
|-------------|-----------|-------|
| hsa-mir-139 | BCAS1     | 0.54  |
| hsa-mir-139 | BCL11A    | 0.56  |
| hsa-mir-139 | BCL11B    | 0.48  |
| hsa-mir-139 | BEGAIN    | 0.51  |
| hsa-mir-139 | BEX2      | 0.63  |
| hsa-mir-139 | BEX4      | 0.57  |
| hsa-mir-139 | BEX5      | 0.64  |
| hsa-mir-139 | BHLHB5    | 0.61  |
| hsa-mir-139 | BRSK2     | 0.59  |
| hsa-mir-139 | BRUNOL4   | 0.73  |
| hsa-mir-139 | BRUNOL5   | 0.68  |
| hsa-mir-139 | BSN       | 0.69  |
| hsa-mir-139 | BSPRY     | 0.56  |
| hsa-mir-139 | BZRAP1    | 0.57  |
| hsa-mir-139 | C10orf116 | 0.32  |
| hsa-mir-139 | C10orf35  | 0.5   |
| hsa-mir-139 | C10orf38  | 0.58  |
| hsa-mir-139 | C11orf41  | 0.55  |
| hsa-mir-139 | C11orf9   | 0.53  |
| hsa-mir-139 | C13orf16  | 0.66  |
| hsa-mir-139 | C15orf27  | 0.59  |
| hsa-mir-139 | C19orf30  | 0.52  |
| hsa-mir-139 | C1orf115  | 0.7   |
| hsa-mir-139 | C1QL2     | 0.54  |
| hsa-mir-139 | C1QL3     | 0.76  |
| hsa-mir-139 | C1QTNF4   | 0.71  |
| hsa-mir-139 | C21orf62  | -0.48 |
| hsa-mir-139 | C2orf32   | 0.53  |
| hsa-mir-139 | C6orf114  | 0.58  |
| hsa-mir-139 | C6orf154  | 0.57  |
| hsa-mir-139 | C7orf16   | 0.47  |
| hsa-mir-139 | C7orf41   | 0.63  |
| hsa-mir-139 | C8orf47   | 0.56  |
| hsa-mir-139 | C9orf125  | 0.58  |
| hsa-mir-139 | CA10      | 0.49  |
| hsa-mir-139 | CA11      | 0.66  |
| hsa-mir-139 | CA12      | -0.54 |
| hsa-mir-139 | CABP1     | 0.79  |
| hsa-mir-139 | CACNA2D2  | 0.47  |
| hsa-mir-139 | CACNA2D3  | 0.59  |
| hsa-mir-139 | CACNB1    | 0.71  |
| hsa-mir-139 | CACNG3    | 0.75  |
| hsa-mir-139 | CALB1     | 0.36  |
| hsa-mir-139 | CALN1     | 0.65  |
| hsa-mir-139 | CAMK1G    | 0.69  |
| hsa-mir-139 | CAMK2A    | 0.62  |
| hsa-mir-139 | CAMK2G    | 0.63  |
| hsa-mir-139 | CAMKK1    | 0.75  |
| hsa-mir-139 | CAMKV     | 0.72  |
| hsa-mir-139 | CAPN13    | 0.47  |
| hsa-mir-139 | CARTPT    | 0.61  |
| hsa-mir-139 | CBFA2T3   | 0.64  |
| hsa-mir-139 | CBLN1     | 0.6   |

|             |          |       |
|-------------|----------|-------|
| hsa-mir-139 | CBLN2    | 0.74  |
| hsa-mir-139 | CBLN4    | 0.37  |
| hsa-mir-139 | CBX7     | 0.6   |
| hsa-mir-139 | CCDC102B | -0.48 |
| hsa-mir-139 | CCDC46   | -0.46 |
| hsa-mir-139 | CCDC85A  | 0.66  |
| hsa-mir-139 | CCK      | 0.67  |
| hsa-mir-139 | CCKBR    | 0.81  |
| hsa-mir-139 | CD200    | 0.6   |
| hsa-mir-139 | CD93     | -0.62 |
| hsa-mir-139 | CDH12    | 0.8   |
| hsa-mir-139 | CDH13    | 0.53  |
| hsa-mir-139 | CDH18    | 0.79  |
| hsa-mir-139 | CDH22    | 0.61  |
| hsa-mir-139 | CDH7     | 0.59  |
| hsa-mir-139 | CDH8     | 0.69  |
| hsa-mir-139 | CDH9     | 0.81  |
| hsa-mir-139 | CDK5R1   | 0.6   |
| hsa-mir-139 | CDKL2    | 0.48  |
| hsa-mir-139 | CDKL5    | 0.67  |
| hsa-mir-139 | CDR1     | 0.55  |
| hsa-mir-139 | CENTD3   | -0.48 |
| hsa-mir-139 | CHD5     | 0.71  |
| hsa-mir-139 | CHGA     | 0.65  |
| hsa-mir-139 | CHGB     | 0.57  |
| hsa-mir-139 | CHN1     | 0.54  |
| hsa-mir-139 | CISD1    | 0.55  |
| hsa-mir-139 | CKMT1A   | 0.73  |
| hsa-mir-139 | CLCA4    | 0.56  |
| hsa-mir-139 | CLEC2L   | 0.77  |
| hsa-mir-139 | CLEC4G   | 0.63  |
| hsa-mir-139 | CLTB     | 0.76  |
| hsa-mir-139 | CMTM3    | -0.57 |
| hsa-mir-139 | CNKSR2   | 0.78  |
| hsa-mir-139 | CNTN3    | 0.62  |
| hsa-mir-139 | CNTN4    | 0.67  |
| hsa-mir-139 | CNTNAP2  | 0.71  |
| hsa-mir-139 | CNTNAP4  | 0.6   |
| hsa-mir-139 | COL4A1   | -0.64 |
| hsa-mir-139 | COL4A2   | -0.6  |
| hsa-mir-139 | CORO6    | 0.67  |
| hsa-mir-139 | CPEB3    | 0.7   |
| hsa-mir-139 | CPLX1    | 0.68  |
| hsa-mir-139 | CPLX2    | 0.8   |
| hsa-mir-139 | CPNE6    | 0.69  |
| hsa-mir-139 | CPNE7    | 0.59  |
| hsa-mir-139 | CPNE9    | 0.62  |
| hsa-mir-139 | CREG2    | 0.71  |
| hsa-mir-139 | CRHBP    | 0.68  |
| hsa-mir-139 | CRTAC1   | 0.61  |
| hsa-mir-139 | CRYM     | 0.7   |
| hsa-mir-139 | CTXN3    | 0.67  |
| hsa-mir-139 | CUTL2    | 0.71  |

|             |             |       |
|-------------|-------------|-------|
| hsa-mir-139 | CYFIP2      | 0.63  |
| hsa-mir-139 | CYP26B1     | 0.52  |
| hsa-mir-139 | CYP4B1      | 0.38  |
| hsa-mir-139 | CYP4X1      | 0.77  |
| hsa-mir-139 | DACH2       | 0.73  |
| hsa-mir-139 | DACT3       | 0.61  |
| hsa-mir-139 | DBC1        | 0.56  |
| hsa-mir-139 | DBH         | 0.5   |
| hsa-mir-139 | DDN         | 0.78  |
| hsa-mir-139 | DHDH        | 0.53  |
| hsa-mir-139 | DIRAS2      | 0.4   |
| hsa-mir-139 | KFZP564O082 | 0.41  |
| hsa-mir-139 | DLG2        | 0.62  |
| hsa-mir-139 | DLGAP2      | 0.68  |
| hsa-mir-139 | DLX6        | 0.38  |
| hsa-mir-139 | DNAJA4      | 0.42  |
| hsa-mir-139 | DNAJC12     | 0.62  |
| hsa-mir-139 | DNM1        | 0.67  |
| hsa-mir-139 | DNM3        | 0.51  |
| hsa-mir-139 | DOC2A       | 0.75  |
| hsa-mir-139 | DOK6        | 0.66  |
| hsa-mir-139 | DPP10       | 0.61  |
| hsa-mir-139 | DPY19L1     | -0.51 |
| hsa-mir-139 | DPYSL3      | -0.44 |
| hsa-mir-139 | DRD1        | 0.73  |
| hsa-mir-139 | DRD1IP      | 0.78  |
| hsa-mir-139 | DRD5        | 0.62  |
| hsa-mir-139 | DUSP26      | 0.52  |
| hsa-mir-139 | DUSP8       | 0.59  |
| hsa-mir-139 | DYDC2       | 0.48  |
| hsa-mir-139 | DYNC111     | 0.67  |
| hsa-mir-139 | EDG8        | 0.55  |
| hsa-mir-139 | EFCBP1      | 0.52  |
| hsa-mir-139 | EFCBP2      | 0.71  |
| hsa-mir-139 | EFHA2       | 0.76  |
| hsa-mir-139 | EHD2        | -0.47 |
| hsa-mir-139 | EHD3        | 0.62  |
| hsa-mir-139 | EIF4A2      | 0.56  |
| hsa-mir-139 | ELK3        | -0.52 |
| hsa-mir-139 | EMP1        | -0.55 |
| hsa-mir-139 | ENC1        | 0.59  |
| hsa-mir-139 | ENPEP       | -0.55 |
| hsa-mir-139 | EPB41L1     | 0.59  |
| hsa-mir-139 | EPB49       | 0.69  |
| hsa-mir-139 | EPHA10      | 0.73  |
| hsa-mir-139 | EPHB6       | 0.75  |
| hsa-mir-139 | EPN3        | 0.52  |
| hsa-mir-139 | ERC2        | 0.7   |
| hsa-mir-139 | EXTL1       | 0.67  |
| hsa-mir-139 | F2R         | -0.59 |
| hsa-mir-139 | FA2H        | 0.57  |
| hsa-mir-139 | FABP3       | 0.52  |
| hsa-mir-139 | FABP6       | 0.62  |

|             |           |       |
|-------------|-----------|-------|
| hsa-mir-139 | FAM133A   | 0.54  |
| hsa-mir-139 | FAM19A1   | 0.6   |
| hsa-mir-139 | FAM19A2   | 0.73  |
| hsa-mir-139 | FAM19A4   | 0.59  |
| hsa-mir-139 | FAM46A    | -0.53 |
| hsa-mir-139 | FAM50B    | 0.23  |
| hsa-mir-139 | FAM77C    | 0.44  |
| hsa-mir-139 | FAM79A    | 0.62  |
| hsa-mir-139 | FAM81A    | 0.56  |
| hsa-mir-139 | FBXL15    | 0.64  |
| hsa-mir-139 | FBXL16    | 0.7   |
| hsa-mir-139 | FBXL2     | 0.46  |
| hsa-mir-139 | FBXO2     | 0.63  |
| hsa-mir-139 | FBXO40    | 0.66  |
| hsa-mir-139 | FBXO41    | 0.64  |
| hsa-mir-139 | FBXW7     | 0.68  |
| hsa-mir-139 | FEZF2     | 0.56  |
| hsa-mir-139 | FGF12     | 0.52  |
| hsa-mir-139 | FGF13     | 0.72  |
| hsa-mir-139 | FGF9      | 0.59  |
| hsa-mir-139 | FKBP9L    | -0.48 |
| hsa-mir-139 | FLJ33790  | 0.51  |
| hsa-mir-139 | FLJ34047  | 0.66  |
| hsa-mir-139 | FLJ37464  | 0.67  |
| hsa-mir-139 | FREQ      | 0.58  |
| hsa-mir-139 | FRMPD4    | 0.7   |
| hsa-mir-139 | FSD1      | 0.47  |
| hsa-mir-139 | FSTL1     | -0.53 |
| hsa-mir-139 | FSTL4     | 0.59  |
| hsa-mir-139 | FSTL5     | 0.7   |
| hsa-mir-139 | FZD9      | 0.43  |
| hsa-mir-139 | GABARAPL3 | 0.64  |
| hsa-mir-139 | GABBR2    | 0.48  |
| hsa-mir-139 | GABRA1    | 0.68  |
| hsa-mir-139 | GABRA2    | 0.58  |
| hsa-mir-139 | GABRA4    | 0.62  |
| hsa-mir-139 | GABRA5    | 0.74  |
| hsa-mir-139 | GABRB1    | 0.42  |
| hsa-mir-139 | GABRB3    | 0.62  |
| hsa-mir-139 | GABRG1    | 0.66  |
| hsa-mir-139 | GABRG2    | 0.74  |
| hsa-mir-139 | GAD2      | 0.59  |
| hsa-mir-139 | GALNT9    | 0.57  |
| hsa-mir-139 | GALNTL1   | 0.37  |
| hsa-mir-139 | GALNTL5   | 0.7   |
| hsa-mir-139 | GAST      | 0.6   |
| hsa-mir-139 | GDA       | 0.67  |
| hsa-mir-139 | GFOD1     | 0.63  |
| hsa-mir-139 | GJB1      | 0.5   |
| hsa-mir-139 | GJB5      | 0.54  |
| hsa-mir-139 | GJB6      | 0.68  |
| hsa-mir-139 | GLRA3     | 0.43  |
| hsa-mir-139 | GLRB      | 0.48  |

|             |          |       |
|-------------|----------|-------|
| hsa-mir-139 | GLS      | 0.66  |
| hsa-mir-139 | GLS2     | 0.77  |
| hsa-mir-139 | GLT1D1   | 0.75  |
| hsa-mir-139 | GLT25D1  | -0.56 |
| hsa-mir-139 | GLUD1    | 0.41  |
| hsa-mir-139 | GLUD2    | 0.39  |
| hsa-mir-139 | GNG3     | 0.59  |
| hsa-mir-139 | GOT1     | 0.72  |
| hsa-mir-139 | GPI      | -0.02 |
| hsa-mir-139 | GPR22    | 0.69  |
| hsa-mir-139 | GPR26    | 0.64  |
| hsa-mir-139 | GREM2    | 0.75  |
| hsa-mir-139 | GRIN1    | 0.73  |
| hsa-mir-139 | GRIN2A   | 0.69  |
| hsa-mir-139 | GRM1     | 0.58  |
| hsa-mir-139 | GRM7     | 0.61  |
| hsa-mir-139 | GUCA2B   | 0.56  |
| hsa-mir-139 | GUCY1B3  | 0.49  |
| hsa-mir-139 | HAR1A    | 0.71  |
| hsa-mir-139 | HCN1     | 0.76  |
| hsa-mir-139 | HECW1    | 0.69  |
| hsa-mir-139 | HHATL    | 0.63  |
| hsa-mir-139 | HLF      | 0.71  |
| hsa-mir-139 | HMGCLL1  | 0.68  |
| hsa-mir-139 | HMP19    | 0.59  |
| hsa-mir-139 | HOOK1    | 0.61  |
| hsa-mir-139 | HOXD1    | 0.4   |
| hsa-mir-139 | HPCA     | 0.64  |
| hsa-mir-139 | HPCAL4   | 0.64  |
| hsa-mir-139 | HRNBP3   | 0.75  |
| hsa-mir-139 | HS3ST4   | 0.73  |
| hsa-mir-139 | HS6ST3   | 0.67  |
| hsa-mir-139 | HSPA12A  | 0.72  |
| hsa-mir-139 | HSPA6    | -0.52 |
| hsa-mir-139 | HSPB3    | 0.61  |
| hsa-mir-139 | HTR1E    | 0.76  |
| hsa-mir-139 | HTR2A    | 0.63  |
| hsa-mir-139 | HTR2C    | 0.76  |
| hsa-mir-139 | HTR5A    | 0.8   |
| hsa-mir-139 | ICAM5    | 0.77  |
| hsa-mir-139 | IGFBP2   | -0.44 |
| hsa-mir-139 | IGSF21   | 0.48  |
| hsa-mir-139 | IL1RAP   | -0.47 |
| hsa-mir-139 | IL1RAPL1 | 0.6   |
| hsa-mir-139 | INA      | 0.69  |
| hsa-mir-139 | INPP1    | 0.52  |
| hsa-mir-139 | INPP5F   | 0.65  |
| hsa-mir-139 | IQGAP1   | -0.62 |
| hsa-mir-139 | ISCA1    | 0.43  |
| hsa-mir-139 | ITGA1    | -0.51 |
| hsa-mir-139 | ITGA4    | -0.5  |
| hsa-mir-139 | ITPKA    | 0.56  |
| hsa-mir-139 | JAKMIP1  | 0.66  |

|             |          |       |
|-------------|----------|-------|
| hsa-mir-139 | JPH3     | 0.73  |
| hsa-mir-139 | KALRN    | 0.63  |
| hsa-mir-139 | KCNB1    | 0.53  |
| hsa-mir-139 | KCNB2    | 0.69  |
| hsa-mir-139 | KCNC2    | 0.67  |
| hsa-mir-139 | KCNG3    | 0.56  |
| hsa-mir-139 | KCNH3    | 0.61  |
| hsa-mir-139 | KCNIP4   | 0.36  |
| hsa-mir-139 | KCNJ12   | 0.74  |
| hsa-mir-139 | KCNJ3    | 0.68  |
| hsa-mir-139 | KCNK1    | 0.7   |
| hsa-mir-139 | KCNK12   | 0.67  |
| hsa-mir-139 | KCNN1    | 0.72  |
| hsa-mir-139 | KCNV1    | 0.76  |
| hsa-mir-139 | KCTD16   | 0.6   |
| hsa-mir-139 | KCTD4    | 0.66  |
| hsa-mir-139 | KCTD8    | 0.43  |
| hsa-mir-139 | KDELC2   | -0.58 |
| hsa-mir-139 | KHDRBS2  | 0.75  |
| hsa-mir-139 | KIAA0319 | 0.51  |
| hsa-mir-139 | KIAA0513 | 0.72  |
| hsa-mir-139 | KIAA0574 | 0.38  |
| hsa-mir-139 | KIAA0748 | 0.76  |
| hsa-mir-139 | KIAA0774 | 0.76  |
| hsa-mir-139 | KIAA1045 | 0.6   |
| hsa-mir-139 | KIAA1086 | 0.7   |
| hsa-mir-139 | KIAA1107 | 0.72  |
| hsa-mir-139 | KIAA1239 | 0.71  |
| hsa-mir-139 | KIAA1324 | 0.52  |
| hsa-mir-139 | KIAA1394 | 0.58  |
| hsa-mir-139 | KIAA1543 | 0.55  |
| hsa-mir-139 | KIAA1598 | 0.58  |
| hsa-mir-139 | KIAA1622 | 0.73  |
| hsa-mir-139 | KIAA1853 | 0.62  |
| hsa-mir-139 | KIAA1949 | -0.55 |
| hsa-mir-139 | KIF17    | 0.45  |
| hsa-mir-139 | KIF1A    | 0.5   |
| hsa-mir-139 | KIF21B   | 0.5   |
| hsa-mir-139 | KIF5A    | 0.64  |
| hsa-mir-139 | KIF6     | 0.55  |
| hsa-mir-139 | KLHL1    | 0.73  |
| hsa-mir-139 | KLHL2    | 0.55  |
| hsa-mir-139 | KLHL32   | 0.48  |
| hsa-mir-139 | KLK10    | 0.55  |
| hsa-mir-139 | KLK6     | 0.5   |
| hsa-mir-139 | KLK7     | 0.78  |
| hsa-mir-139 | KRT222P  | 0.8   |
| hsa-mir-139 | KSR2     | 0.69  |
| hsa-mir-139 | LAMA2    | -0.41 |
| hsa-mir-139 | LAMA4    | -0.44 |
| hsa-mir-139 | LAMC1    | -0.67 |
| hsa-mir-139 | LDB3     | 0.59  |
| hsa-mir-139 | LDOC1    | 0.48  |

|             |             |       |
|-------------|-------------|-------|
| hsa-mir-139 | LGI3        | 0.64  |
| hsa-mir-139 | LHPP        | 0.58  |
| hsa-mir-139 | LHX6        | 0.68  |
| hsa-mir-139 | LINGO2      | 0.69  |
| hsa-mir-139 | 22NC03-75B3 | 0.72  |
| hsa-mir-139 | LOC130576   | 0.44  |
| hsa-mir-139 | LOC133874   | 0.32  |
| hsa-mir-139 | LOC400120   | 0.66  |
| hsa-mir-139 | LOC554175   | 0.66  |
| hsa-mir-139 | LOC728215   | 0.5   |
| hsa-mir-139 | LRFN2       | 0.69  |
| hsa-mir-139 | LRFN5       | 0.69  |
| hsa-mir-139 | LRRC3B      | 0.31  |
| hsa-mir-139 | LRRC7       | 0.72  |
| hsa-mir-139 | LRTM2       | 0.79  |
| hsa-mir-139 | LY6H        | 0.5   |
| hsa-mir-139 | MACROD2     | 0.54  |
| hsa-mir-139 | MAG         | 0.51  |
| hsa-mir-139 | MAGEE1      | 0.68  |
| hsa-mir-139 | MAL         | 0.63  |
| hsa-mir-139 | MAL2        | 0.72  |
| hsa-mir-139 | MAP2K4      | 0.71  |
| hsa-mir-139 | MAP7D2      | 0.75  |
| hsa-mir-139 | MAST1       | 0.6   |
| hsa-mir-139 | MAST3       | 0.76  |
| hsa-mir-139 | MATK        | 0.8   |
| hsa-mir-139 | MBP         | 0.54  |
| hsa-mir-139 | MCF2        | 0.53  |
| hsa-mir-139 | MDH1        | 0.63  |
| hsa-mir-139 | MDK         | -0.54 |
| hsa-mir-139 | MFSD4       | 0.64  |
| hsa-mir-139 | MGAT4C      | 0.49  |
| hsa-mir-139 | MGAT5B      | 0.54  |
| hsa-mir-139 | MGC39606    | 0.63  |
| hsa-mir-139 | MGC5566     | 0.54  |
| hsa-mir-139 | MICAL2      | 0.7   |
| hsa-mir-139 | MOBP        | 0.59  |
| hsa-mir-139 | MOG         | 0.49  |
| hsa-mir-139 | MORC4       | -0.63 |
| hsa-mir-139 | MPP7        | 0.69  |
| hsa-mir-139 | MRC2        | -0.54 |
| hsa-mir-139 | MSN         | -0.57 |
| hsa-mir-139 | MUM1L1      | 0.64  |
| hsa-mir-139 | MYT1L       | 0.7   |
| hsa-mir-139 | NALCN       | 0.59  |
| hsa-mir-139 | NAP1L2      | 0.68  |
| hsa-mir-139 | NAP1L3      | 0.68  |
| hsa-mir-139 | NAP1L5      | 0.62  |
| hsa-mir-139 | NAPB        | 0.71  |
| hsa-mir-139 | NAV3        | 0.52  |
| hsa-mir-139 | NBEA        | 0.55  |
| hsa-mir-139 | NBL1        | 0.55  |
| hsa-mir-139 | NCDN        | 0.65  |

|             |          |       |
|-------------|----------|-------|
| hsa-mir-139 | NDST3    | 0.54  |
| hsa-mir-139 | NDUFB8   | 0.66  |
| hsa-mir-139 | NEFH     | 0.6   |
| hsa-mir-139 | NEFL     | 0.6   |
| hsa-mir-139 | NEFM     | 0.68  |
| hsa-mir-139 | NEGR1    | 0.59  |
| hsa-mir-139 | NES      | -0.49 |
| hsa-mir-139 | NET1     | 0.5   |
| hsa-mir-139 | NETO1    | 0.61  |
| hsa-mir-139 | NEURL    | 0.8   |
| hsa-mir-139 | NEUROD2  | 0.64  |
| hsa-mir-139 | NEUROD6  | 0.69  |
| hsa-mir-139 | NGEF     | 0.6   |
| hsa-mir-139 | NMNAT2   | 0.55  |
| hsa-mir-139 | NOS3     | 0.57  |
| hsa-mir-139 | NOX4     | -0.64 |
| hsa-mir-139 | NPM2     | 0.81  |
| hsa-mir-139 | NPTX1    | 0.56  |
| hsa-mir-139 | NPY      | 0.59  |
| hsa-mir-139 | NPY1R    | 0.54  |
| hsa-mir-139 | NR0B1    | 0.33  |
| hsa-mir-139 | NRGN     | 0.69  |
| hsa-mir-139 | NRSN1    | 0.51  |
| hsa-mir-139 | NRXN3    | 0.54  |
| hsa-mir-139 | NTN4     | 0.49  |
| hsa-mir-139 | NY-REN-7 | 0.75  |
| hsa-mir-139 | OCA2     | 0.66  |
| hsa-mir-139 | ODZ2     | 0.43  |
| hsa-mir-139 | OGDHL    | 0.44  |
| hsa-mir-139 | OLFM1    | 0.58  |
| hsa-mir-139 | OLFM3    | 0.66  |
| hsa-mir-139 | ONECUT1  | 0     |
| hsa-mir-139 | OPRK1    | 0.63  |
| hsa-mir-139 | P2RX5    | 0.55  |
| hsa-mir-139 | PACSN1   | 0.78  |
| hsa-mir-139 | PAIP2B   | 0.66  |
| hsa-mir-139 | PAK3     | 0.58  |
| hsa-mir-139 | PAK7     | 0.61  |
| hsa-mir-139 | PALM     | 0.47  |
| hsa-mir-139 | PCDH11Y  | 0.65  |
| hsa-mir-139 | PCLO     | 0.68  |
| hsa-mir-139 | PCSK2    | 0.62  |
| hsa-mir-139 | PDE1A    | 0.6   |
| hsa-mir-139 | PDE1B    | 0.57  |
| hsa-mir-139 | PDE2A    | 0.86  |
| hsa-mir-139 | PDIA2    | 0.59  |
| hsa-mir-139 | PDIA3    | -0.42 |
| hsa-mir-139 | PDIA4    | -0.63 |
| hsa-mir-139 | PDXP     | 0.62  |
| hsa-mir-139 | PDYN     | 0.59  |
| hsa-mir-139 | PEG3     | 0.56  |
| hsa-mir-139 | PEX5L    | 0.69  |
| hsa-mir-139 | PFN2     | 0.51  |



|             |           |       |
|-------------|-----------|-------|
| hsa-mir-139 | PGBD5     | 0.57  |
| hsa-mir-139 | PGGT1B    | -0.51 |
| hsa-mir-139 | PHYHIP    | 0.68  |
| hsa-mir-139 | PIP3-E    | 0.67  |
| hsa-mir-139 | PIP5K1B   | 0.53  |
| hsa-mir-139 | PLAC2     | 0.63  |
| hsa-mir-139 | PLCB1     | 0.55  |
| hsa-mir-139 | PLCXD3    | 0.54  |
| hsa-mir-139 | PLEKHA1   | 0.68  |
| hsa-mir-139 | PLEKHG2   | -0.6  |
| hsa-mir-139 | PLLP      | 0.51  |
| hsa-mir-139 | PLP1      | 0.58  |
| hsa-mir-139 | PNCK      | 0.78  |
| hsa-mir-139 | PNMA3     | 0.69  |
| hsa-mir-139 | PNMA5     | 0.7   |
| hsa-mir-139 | PNOC      | 0.47  |
| hsa-mir-139 | POPDC3    | 0.4   |
| hsa-mir-139 | PPFIA4    | 0.52  |
| hsa-mir-139 | PPM1H     | 0.69  |
| hsa-mir-139 | PPM2C     | 0.4   |
| hsa-mir-139 | PPP1R16B  | 0.72  |
| hsa-mir-139 | PPP1R1A   | 0.61  |
| hsa-mir-139 | PPP2R2C   | 0.74  |
| hsa-mir-139 | PPP3CA    | 0.69  |
| hsa-mir-139 | PPP3CB    | 0.74  |
| hsa-mir-139 | PRDM12    | 0.48  |
| hsa-mir-139 | PREPL     | 0.63  |
| hsa-mir-139 | PRG2      | 0.57  |
| hsa-mir-139 | PRKCB1    | 0.64  |
| hsa-mir-139 | PRKCE     | 0.78  |
| hsa-mir-139 | PRMT8     | 0.65  |
| hsa-mir-139 | PRRT1     | 0.72  |
| hsa-mir-139 | PRSS1     | 0.53  |
| hsa-mir-139 | PRSS2     | 0.56  |
| hsa-mir-139 | PRSS3     | 0.7   |
| hsa-mir-139 | PSD       | 0.75  |
| hsa-mir-139 | PTBP2     | 0.55  |
| hsa-mir-139 | PTPN12    | -0.53 |
| hsa-mir-139 | PTPN5     | 0.67  |
| hsa-mir-139 | PTPRN     | 0.57  |
| hsa-mir-139 | PTPRR     | 0.61  |
| hsa-mir-139 | PTPRT     | 0.53  |
| hsa-mir-139 | PVALB     | 0.65  |
| hsa-mir-139 | QDPR      | 0.62  |
| hsa-mir-139 | RAB11FIP2 | 0.51  |
| hsa-mir-139 | RAB11FIP4 | 0.69  |
| hsa-mir-139 | RAB26     | 0.61  |
| hsa-mir-139 | RAB33A    | 0.54  |
| hsa-mir-139 | RAB3A     | 0.7   |
| hsa-mir-139 | RAB40B    | 0.65  |
| hsa-mir-139 | RAP1GAP   | 0.55  |
| hsa-mir-139 | RAPGEFL1  | 0.67  |
| hsa-mir-139 | RASAL1    | 0.74  |

|             |          |       |
|-------------|----------|-------|
| hsa-mir-139 | RASGEF1A | 0.49  |
| hsa-mir-139 | RASGEF1C | 0.55  |
| hsa-mir-139 | RASGRF1  | 0.7   |
| hsa-mir-139 | RASGRF2  | 0.69  |
| hsa-mir-139 | RASL10A  | 0.63  |
| hsa-mir-139 | RASL11B  | 0.47  |
| hsa-mir-139 | RBM11    | 0.74  |
| hsa-mir-139 | RBMS1    | -0.48 |
| hsa-mir-139 | RBP4     | 0.7   |
| hsa-mir-139 | RDHE2    | 0.77  |
| hsa-mir-139 | REEP1    | 0.5   |
| hsa-mir-139 | RELN     | 0.69  |
| hsa-mir-139 | REPS2    | 0.64  |
| hsa-mir-139 | RFPL1    | 0.74  |
| hsa-mir-139 | RFPL2    | 0.72  |
| hsa-mir-139 | RFPL3    | 0.69  |
| hsa-mir-139 | RGS7     | 0.57  |
| hsa-mir-139 | RHCG     | 0.22  |
| hsa-mir-139 | RICH2    | 0.75  |
| hsa-mir-139 | RIMBP2   | 0.71  |
| hsa-mir-139 | RIMS2    | 0.68  |
| hsa-mir-139 | RIMS3    | 0.75  |
| hsa-mir-139 | RNF122   | -0.14 |
| hsa-mir-139 | RNF41    | 0.59  |
| hsa-mir-139 | RNF43    | 0.52  |
| hsa-mir-139 | RPRML    | 0.54  |
| hsa-mir-139 | RPS6KA5  | 0.57  |
| hsa-mir-139 | RSPO2    | 0.55  |
| hsa-mir-139 | RTN4R    | 0.65  |
| hsa-mir-139 | RTN4RL1  | 0.76  |
| hsa-mir-139 | RUFY2    | 0.56  |
| hsa-mir-139 | RUNDC3A  | 0.74  |
| hsa-mir-139 | RXFP1    | 0.54  |
| hsa-mir-139 | RYR2     | 0.81  |
| hsa-mir-139 | S100A1   | 0.63  |
| hsa-mir-139 | SAMD12   | 0.75  |
| hsa-mir-139 | SCAMP5   | 0.59  |
| hsa-mir-139 | SCARA5   | 0.51  |
| hsa-mir-139 | SCN2A    | 0.58  |
| hsa-mir-139 | SCN3B    | 0.58  |
| hsa-mir-139 | SCN8A    | 0.54  |
| hsa-mir-139 | SDF2L1   | -0.23 |
| hsa-mir-139 | SEC14L5  | 0.63  |
| hsa-mir-139 | SEMA3D   | 0.52  |
| hsa-mir-139 | SERPINI1 | 0.67  |
| hsa-mir-139 | SFRP1    | 0.34  |
| hsa-mir-139 | SFTPD    | 0.42  |
| hsa-mir-139 | SGIP1    | 0.51  |
| hsa-mir-139 | SGSM1    | 0.59  |
| hsa-mir-139 | SH2D5    | 0.64  |
| hsa-mir-139 | SH3BGRL2 | 0.68  |
| hsa-mir-139 | SH3GL2   | 0.67  |
| hsa-mir-139 | SH3GL3   | 0.75  |

|             |         |       |
|-------------|---------|-------|
| hsa-mir-139 | SH3GLB2 | 0.6   |
| hsa-mir-139 | SHANK2  | 0.72  |
| hsa-mir-139 | SHOX2   | -0.57 |
| hsa-mir-139 | SLC12A5 | 0.74  |
| hsa-mir-139 | SLC17A6 | 0.54  |
| hsa-mir-139 | SLC17A7 | 0.8   |
| hsa-mir-139 | SLC1A6  | 0.63  |
| hsa-mir-139 | SLC27A2 | 0.54  |
| hsa-mir-139 | SLC30A3 | 0.73  |
| hsa-mir-139 | SLC32A1 | 0.62  |
| hsa-mir-139 | SLC35D1 | -0.56 |
| hsa-mir-139 | SLC35F3 | 0.75  |
| hsa-mir-139 | SLC4A10 | 0.59  |
| hsa-mir-139 | SLC5A11 | 0.5   |
| hsa-mir-139 | SLC6A15 | 0.62  |
| hsa-mir-139 | SLC7A14 | 0.53  |
| hsa-mir-139 | SLC8A2  | 0.78  |
| hsa-mir-139 | SLC9A2  | 0.49  |
| hsa-mir-139 | SLC9A5  | 0.53  |
| hsa-mir-139 | SLCO3A1 | 0.41  |
| hsa-mir-139 | SLITRK4 | 0.68  |
| hsa-mir-139 | SMPX    | 0.75  |
| hsa-mir-139 | SNAP25  | 0.59  |
| hsa-mir-139 | SNAP91  | 0.67  |
| hsa-mir-139 | SNCA    | 0.71  |
| hsa-mir-139 | SNCB    | 0.75  |
| hsa-mir-139 | SNCG    | 0.79  |
| hsa-mir-139 | SNIP    | 0.7   |
| hsa-mir-139 | SNPH    | 0.53  |
| hsa-mir-139 | SNTG2   | 0.38  |
| hsa-mir-139 | SOHLH1  | 0.74  |
| hsa-mir-139 | SOSTDC1 | 0.42  |
| hsa-mir-139 | SOX10   | 0.44  |
| hsa-mir-139 | SPATA6  | -0.52 |
| hsa-mir-139 | SPG3A   | 0.7   |
| hsa-mir-139 | SPINT2  | 0.58  |
| hsa-mir-139 | SPOCK3  | 0.6   |
| hsa-mir-139 | SPRY1   | -0.48 |
| hsa-mir-139 | SPTBN2  | 0.62  |
| hsa-mir-139 | SRPX    | -0.5  |
| hsa-mir-139 | SRPX2   | -0.58 |
| hsa-mir-139 | SST     | 0.58  |
| hsa-mir-139 | SSTR1   | 0.79  |
| hsa-mir-139 | SSTR2   | 0.61  |
| hsa-mir-139 | ST8SIA3 | 0.59  |
| hsa-mir-139 | STAR    | 0.64  |
| hsa-mir-139 | STK32C  | 0.66  |
| hsa-mir-139 | STX1A   | 0.72  |
| hsa-mir-139 | STXBP1  | 0.76  |
| hsa-mir-139 | STXBP5L | 0.49  |
| hsa-mir-139 | STXBP6  | 0.67  |
| hsa-mir-139 | STYK1   | 0.75  |
| hsa-mir-139 | SULT4A1 | 0.77  |

|             |         |       |
|-------------|---------|-------|
| hsa-mir-139 | SUSD5   | 0.38  |
| hsa-mir-139 | SV2B    | 0.65  |
| hsa-mir-139 | SYN2    | 0.75  |
| hsa-mir-139 | SYNGR1  | 0.69  |
| hsa-mir-139 | SYNGR3  | 0.71  |
| hsa-mir-139 | SYNPR   | 0.63  |
| hsa-mir-139 | SYP     | 0.69  |
| hsa-mir-139 | SYT1    | 0.65  |
| hsa-mir-139 | SYT13   | 0.71  |
| hsa-mir-139 | SYT3    | 0.54  |
| hsa-mir-139 | SYT4    | 0.53  |
| hsa-mir-139 | SYT5    | 0.78  |
| hsa-mir-139 | TAC3    | 0.53  |
| hsa-mir-139 | TACSTD1 | 0.5   |
| hsa-mir-139 | TAGLN3  | 0.56  |
| hsa-mir-139 | TBR1    | 0.59  |
| hsa-mir-139 | TBX2    | -0.53 |
| hsa-mir-139 | TCBA1   | 0.63  |
| hsa-mir-139 | TCEAL1  | 0.4   |
| hsa-mir-139 | TCERG1L | 0.73  |
| hsa-mir-139 | TCTN1   | -0.52 |
| hsa-mir-139 | TDRD9   | 0.56  |
| hsa-mir-139 | TF      | 0.55  |
| hsa-mir-139 | TGIF1   | -0.64 |
| hsa-mir-139 | TIAM2   | 0.4   |
| hsa-mir-139 | TMCC2   | 0.65  |
| hsa-mir-139 | TMEFF1  | 0.52  |
| hsa-mir-139 | TMEFF2  | 0.55  |
| hsa-mir-139 | TMEM10  | 0.72  |
| hsa-mir-139 | TMEM125 | 0.6   |
| hsa-mir-139 | TMEM130 | 0.59  |
| hsa-mir-139 | TMEM155 | 0.71  |
| hsa-mir-139 | TMEM16C | 0.74  |
| hsa-mir-139 | TMEM16D | 0.55  |
| hsa-mir-139 | TMEM24  | 0.63  |
| hsa-mir-139 | TMEM56  | 0.43  |
| hsa-mir-139 | TMEM67  | -0.45 |
| hsa-mir-139 | TNC     | -0.58 |
| hsa-mir-139 | TNNI3K  | 0.4   |
| hsa-mir-139 | TNNT1   | 0.62  |
| hsa-mir-139 | TNNT2   | 0.74  |
| hsa-mir-139 | TNRC4   | 0.64  |
| hsa-mir-139 | TPO     | 0.57  |
| hsa-mir-139 | TRIM17  | 0.67  |
| hsa-mir-139 | TSPAN19 | 0.42  |
| hsa-mir-139 | TSPYL5  | 0.43  |
| hsa-mir-139 | TTC9B   | 0.58  |
| hsa-mir-139 | TUBA4A  | 0.57  |
| hsa-mir-139 | TUBA8   | 0.74  |
| hsa-mir-139 | TULP4   | 0.52  |
| hsa-mir-139 | UNC13C  | 0.69  |
| hsa-mir-139 | UPP2    | 0.33  |
| hsa-mir-139 | USP43   | 0.51  |

|             |          |       |
|-------------|----------|-------|
| hsa-mir-139 | VAMP2    | 0.61  |
| hsa-mir-139 | VIM      | -0.61 |
| hsa-mir-139 | VIP      | 0.67  |
| hsa-mir-139 | VIPR2    | 0.26  |
| hsa-mir-139 | VIT      | 0.38  |
| hsa-mir-139 | VSNL1    | 0.65  |
| hsa-mir-139 | VSTM2L   | 0.61  |
| hsa-mir-139 | WASF1    | 0.6   |
| hsa-mir-139 | WBSCR17  | 0.63  |
| hsa-mir-139 | WDR35    | -0.59 |
| hsa-mir-139 | WDR47    | 0.62  |
| hsa-mir-139 | WDR7     | 0.61  |
| hsa-mir-139 | WEE1     | -0.64 |
| hsa-mir-139 | WFDC1    | 0.52  |
| hsa-mir-139 | WIF1     | 0.61  |
| hsa-mir-139 | WNT10B   | 0.8   |
| hsa-mir-139 | WSCD2    | 0.72  |
| hsa-mir-139 | XK       | 0.56  |
| hsa-mir-139 | YPEL4    | 0.63  |
| hsa-mir-139 | YWHAH    | 0.61  |
| hsa-mir-139 | ZMAT4    | 0.45  |
| hsa-mir-139 | ZNF20    | -0.47 |
| hsa-mir-139 | ZNF25    | 0.48  |
| hsa-mir-139 | ZNF365   | 0.62  |
| hsa-mir-139 | ZNF488   | 0.48  |
| hsa-mir-139 | ZNF533   | 0.54  |
| hsa-mir-139 | ZNF540   | 0.58  |
| hsa-mir-140 | ANUBL1   | 0.28  |
| hsa-mir-140 | ATP6V0A4 | 0.21  |
| hsa-mir-140 | CCNB3    | 0.42  |
| hsa-mir-140 | CEP170   | 0.18  |
| hsa-mir-140 | CH25H    | -0.21 |
| hsa-mir-140 | CLIC1    | -0.42 |
| hsa-mir-140 | COL11A1  | 0.17  |
| hsa-mir-140 | DCX      | 0.32  |
| hsa-mir-140 | DDB2     | -0.37 |
| hsa-mir-140 | ERBB3    | 0.25  |
| hsa-mir-140 | FCRLA    | 0.31  |
| hsa-mir-140 | FLJ38723 | -0.25 |
| hsa-mir-140 | HOMER3   | -0.34 |
| hsa-mir-140 | IFIT3    | -0.15 |
| hsa-mir-140 | MEX3B    | 0.33  |
| hsa-mir-140 | MGC39715 | 0.15  |
| hsa-mir-140 | MYBPH    | -0.29 |
| hsa-mir-140 | NEDD4L   | -0.06 |
| hsa-mir-140 | NKX2-2   | 0.26  |
| hsa-mir-140 | PLAGL1   | -0.25 |
| hsa-mir-140 | PTX3     | -0.36 |
| hsa-mir-140 | SERPINA3 | -0.2  |
| hsa-mir-140 | SOX13    | 0.31  |
| hsa-mir-140 | TBX5     | 0.22  |
| hsa-mir-140 | UNQ6975  | 0.28  |
| hsa-mir-140 | UST      | 0.25  |

|                |          |       |
|----------------|----------|-------|
| hsa-mir-141    | C2orf32  | -0.14 |
| hsa-mir-141    | CIRBP    | -0.26 |
| hsa-mir-141    | FGF14    | -0.23 |
| hsa-mir-141    | LRRN1    | -0.13 |
| hsa-mir-141    | MRPS33   | 0.21  |
| hsa-mir-141    | NTS      | 0.23  |
| hsa-mir-141    | PCDHB3   | -0.1  |
| hsa-mir-141    | PMP2     | -0.05 |
| hsa-mir-141    | TMEM121  | -0.2  |
| hsa-mir-141    | XKR6     | -0.26 |
| hsa-mir-141    | ZNF177   | -0.25 |
| hsa-mir-142-3p | ABCA13   | 0.41  |
| hsa-mir-142-3p | ABCC3    | 0.48  |
| hsa-mir-142-3p | ABI3     | 0.52  |
| hsa-mir-142-3p | ACPP     | 0.53  |
| hsa-mir-142-3p | ADAM28   | 0.46  |
| hsa-mir-142-3p | AIF1     | 0.51  |
| hsa-mir-142-3p | ALOX5    | 0.62  |
| hsa-mir-142-3p | ALPK1    | 0.56  |
| hsa-mir-142-3p | AMICA1   | 0.54  |
| hsa-mir-142-3p | AMPD3    | 0.5   |
| hsa-mir-142-3p | ANKRD22  | 0.4   |
| hsa-mir-142-3p | AOAH     | 0.44  |
| hsa-mir-142-3p | APBB1IP  | 0.45  |
| hsa-mir-142-3p | APOB48R  | 0.55  |
| hsa-mir-142-3p | APOBEC3F | 0.54  |
| hsa-mir-142-3p | APOBEC3H | 0.55  |
| hsa-mir-142-3p | APOC1    | 0.47  |
| hsa-mir-142-3p | APOC4    | 0.46  |
| hsa-mir-142-3p | APOL3    | 0.44  |
| hsa-mir-142-3p | ARHGAP15 | 0.5   |
| hsa-mir-142-3p | ARHGAP30 | 0.67  |
| hsa-mir-142-3p | ARHGAP4  | 0.56  |
| hsa-mir-142-3p | ARHGAP9  | 0.61  |
| hsa-mir-142-3p | ARHGDIB  | 0.55  |
| hsa-mir-142-3p | ARL11    | 0.51  |
| hsa-mir-142-3p | ARPC1B   | 0.47  |
| hsa-mir-142-3p | ASCL2    | 0.47  |
| hsa-mir-142-3p | ATP8B4   | 0.47  |
| hsa-mir-142-3p | BATF     | 0.58  |
| hsa-mir-142-3p | BCL2A1   | 0.48  |
| hsa-mir-142-3p | BLNK     | 0.42  |
| hsa-mir-142-3p | BMP2K    | 0.51  |
| hsa-mir-142-3p | BNC2     | 0.4   |
| hsa-mir-142-3p | BTK      | 0.46  |
| hsa-mir-142-3p | C10orf11 | 0.47  |
| hsa-mir-142-3p | C17orf60 | 0.52  |
| hsa-mir-142-3p | C1orf162 | 0.51  |
| hsa-mir-142-3p | C1orf38  | 0.57  |
| hsa-mir-142-3p | C1QB     | 0.49  |
| hsa-mir-142-3p | C1QC     | 0.43  |
| hsa-mir-142-3p | C1S      | 0.48  |
| hsa-mir-142-3p | C2       | 0.44  |

|                |          |       |
|----------------|----------|-------|
| hsa-mir-142-3p | C3       | 0.46  |
| hsa-mir-142-3p | C3AR1    | 0.5   |
| hsa-mir-142-3p | C5orf29  | 0.52  |
| hsa-mir-142-3p | CACNA2D4 | 0.54  |
| hsa-mir-142-3p | CALML4   | 0.34  |
| hsa-mir-142-3p | CAMP     | 0.4   |
| hsa-mir-142-3p | CAPG     | 0.56  |
| hsa-mir-142-3p | CARD6    | 0.52  |
| hsa-mir-142-3p | CARD9    | 0.59  |
| hsa-mir-142-3p | CASP1    | 0.49  |
| hsa-mir-142-3p | CASP5    | 0.53  |
| hsa-mir-142-3p | CAST     | 0.54  |
| hsa-mir-142-3p | CCL5     | 0.5   |
| hsa-mir-142-3p | CCR1     | 0.48  |
| hsa-mir-142-3p | CCR2     | 0.51  |
| hsa-mir-142-3p | CCR5     | 0.59  |
| hsa-mir-142-3p | CCR7     | 0.51  |
| hsa-mir-142-3p | CD14     | 0.52  |
| hsa-mir-142-3p | CD180    | 0.5   |
| hsa-mir-142-3p | CD1D     | 0.52  |
| hsa-mir-142-3p | CD2      | 0.57  |
| hsa-mir-142-3p | CD247    | 0.23  |
| hsa-mir-142-3p | CD27     | 0.52  |
| hsa-mir-142-3p | CD300LF  | 0.48  |
| hsa-mir-142-3p | CD302    | 0.51  |
| hsa-mir-142-3p | CD33     | 0.55  |
| hsa-mir-142-3p | CD37     | 0.5   |
| hsa-mir-142-3p | CD3G     | 0.41  |
| hsa-mir-142-3p | CD48     | 0.5   |
| hsa-mir-142-3p | CD53     | 0.5   |
| hsa-mir-142-3p | CD68     | 0.47  |
| hsa-mir-142-3p | CD69     | 0.41  |
| hsa-mir-142-3p | CD72     | 0.51  |
| hsa-mir-142-3p | CD74     | 0.48  |
| hsa-mir-142-3p | CDCP1    | 0.53  |
| hsa-mir-142-3p | CEACAM4  | 0.53  |
| hsa-mir-142-3p | CENTA2   | 0.56  |
| hsa-mir-142-3p | CFB      | 0.41  |
| hsa-mir-142-3p | CFI      | 0.51  |
| hsa-mir-142-3p | CHIT1    | 0.4   |
| hsa-mir-142-3p | CIITA    | 0.51  |
| hsa-mir-142-3p | CKB      | -0.51 |
| hsa-mir-142-3p | CLDN23   | 0.54  |
| hsa-mir-142-3p | CLEC2B   | 0.42  |
| hsa-mir-142-3p | CLEC4A   | 0.45  |
| hsa-mir-142-3p | CLEC4D   | 0.46  |
| hsa-mir-142-3p | CLECL1   | 0.51  |
| hsa-mir-142-3p | CMTM7    | 0.56  |
| hsa-mir-142-3p | COL1A1   | 0.39  |
| hsa-mir-142-3p | COL1A2   | 0.38  |
| hsa-mir-142-3p | COL8A2   | 0.51  |
| hsa-mir-142-3p | CPD      | 0.4   |
| hsa-mir-142-3p | CPVL     | 0.51  |

|                |          |       |
|----------------|----------|-------|
| hsa-mir-142-3p | CST7     | 0.5   |
| hsa-mir-142-3p | CSTA     | 0.62  |
| hsa-mir-142-3p | CTSC     | 0.52  |
| hsa-mir-142-3p | CTSS     | 0.55  |
| hsa-mir-142-3p | CTSZ     | 0.57  |
| hsa-mir-142-3p | CXCL9    | 0.4   |
| hsa-mir-142-3p | CXCR3    | 0.44  |
| hsa-mir-142-3p | CXCR4    | 0.5   |
| hsa-mir-142-3p | CXorf21  | 0.5   |
| hsa-mir-142-3p | CXorf38  | 0.45  |
| hsa-mir-142-3p | CXorf9   | 0.54  |
| hsa-mir-142-3p | CYBB     | 0.56  |
| hsa-mir-142-3p | DAB2     | 0.52  |
| hsa-mir-142-3p | DAPP1    | 0.45  |
| hsa-mir-142-3p | DEF6     | 0.56  |
| hsa-mir-142-3p | DENND1C  | 0.58  |
| hsa-mir-142-3p | DENND2D  | 0.58  |
| hsa-mir-142-3p | DENND3   | 0.43  |
| hsa-mir-142-3p | DOCK2    | 0.47  |
| hsa-mir-142-3p | DOCK8    | 0.56  |
| hsa-mir-142-3p | DOK3     | 0.64  |
| hsa-mir-142-3p | DPEP2    | 0.51  |
| hsa-mir-142-3p | DPYD     | 0.5   |
| hsa-mir-142-3p | DSE      | 0.6   |
| hsa-mir-142-3p | DUSP1    | 0.44  |
| hsa-mir-142-3p | EBI2     | 0.51  |
| hsa-mir-142-3p | EDG6     | 0.51  |
| hsa-mir-142-3p | EMB      | 0.48  |
| hsa-mir-142-3p | EMR1     | 0.41  |
| hsa-mir-142-3p | EVI2B    | 0.53  |
| hsa-mir-142-3p | FAM113B  | 0.6   |
| hsa-mir-142-3p | FAM129A  | 0.47  |
| hsa-mir-142-3p | FAM20A   | 0.47  |
| hsa-mir-142-3p | FAM26F   | 0.52  |
| hsa-mir-142-3p | FAM78A   | 0.41  |
| hsa-mir-142-3p | FAS      | 0.47  |
| hsa-mir-142-3p | FBP1     | 0.56  |
| hsa-mir-142-3p | FCER1G   | 0.53  |
| hsa-mir-142-3p | FCGBP    | 0.49  |
| hsa-mir-142-3p | FCGR2A   | 0.51  |
| hsa-mir-142-3p | FCGR2B   | 0.51  |
| hsa-mir-142-3p | FER1L3   | 0.57  |
| hsa-mir-142-3p | FGD3     | 0.44  |
| hsa-mir-142-3p | FGFBP3   | -0.39 |
| hsa-mir-142-3p | FLI1     | 0.5   |
| hsa-mir-142-3p | FLJ20273 | 0.64  |
| hsa-mir-142-3p | FLJ21438 | 0.56  |
| hsa-mir-142-3p | FLJ22662 | 0.56  |
| hsa-mir-142-3p | FLVCR2   | 0.51  |
| hsa-mir-142-3p | FNDC3B   | 0.48  |
| hsa-mir-142-3p | FPRL2    | 0.5   |
| hsa-mir-142-3p | FUCA1    | 0.49  |
| hsa-mir-142-3p | FYB      | 0.57  |



|                |          |      |
|----------------|----------|------|
| hsa-mir-142-3p | GAA      | 0.45 |
| hsa-mir-142-3p | GBP3     | 0.4  |
| hsa-mir-142-3p | GBP5     | 0.51 |
| hsa-mir-142-3p | GCNT1    | 0.47 |
| hsa-mir-142-3p | GIMAP1   | 0.57 |
| hsa-mir-142-3p | GIMAP8   | 0.5  |
| hsa-mir-142-3p | GMFG     | 0.51 |
| hsa-mir-142-3p | GNGT2    | 0.54 |
| hsa-mir-142-3p | GPR171   | 0.44 |
| hsa-mir-142-3p | GPR18    | 0.47 |
| hsa-mir-142-3p | GPR65    | 0.49 |
| hsa-mir-142-3p | GPR84    | 0.48 |
| hsa-mir-142-3p | GRN      | 0.51 |
| hsa-mir-142-3p | GZMH     | 0.46 |
| hsa-mir-142-3p | GZMK     | 0.49 |
| hsa-mir-142-3p | HAMP     | 0.48 |
| hsa-mir-142-3p | HAVCR2   | 0.54 |
| hsa-mir-142-3p | HCK      | 0.48 |
| hsa-mir-142-3p | HCLS1    | 0.58 |
| hsa-mir-142-3p | HERPUD1  | 0.44 |
| hsa-mir-142-3p | HHEX     | 0.39 |
| hsa-mir-142-3p | HLA-DMA  | 0.58 |
| hsa-mir-142-3p | HLA-DMB  | 0.45 |
| hsa-mir-142-3p | HLA-DOA  | 0.54 |
| hsa-mir-142-3p | HLA-DPA1 | 0.51 |
| hsa-mir-142-3p | HLA-DPB1 | 0.51 |
| hsa-mir-142-3p | HLA-DPB2 | 0.32 |
| hsa-mir-142-3p | HLA-DQB1 | 0.45 |
| hsa-mir-142-3p | HLA-DRB5 | 0.46 |
| hsa-mir-142-3p | HLA-F    | 0.42 |
| hsa-mir-142-3p | HMHA1    | 0.56 |
| hsa-mir-142-3p | HPS3     | 0.45 |
| hsa-mir-142-3p | ICAM1    | 0.45 |
| hsa-mir-142-3p | IER3     | 0.43 |
| hsa-mir-142-3p | IFI30    | 0.55 |
| hsa-mir-142-3p | IKZF1    | 0.52 |
| hsa-mir-142-3p | IL10RA   | 0.57 |
| hsa-mir-142-3p | IL13RA1  | 0.6  |
| hsa-mir-142-3p | IL15     | 0.49 |
| hsa-mir-142-3p | IL18     | 0.51 |
| hsa-mir-142-3p | IL1B     | 0.38 |
| hsa-mir-142-3p | IL21R    | 0.46 |
| hsa-mir-142-3p | IL2RA    | 0.49 |
| hsa-mir-142-3p | IL2RB    | 0.52 |
| hsa-mir-142-3p | IL4R     | 0.54 |
| hsa-mir-142-3p | IL7R     | 0.5  |
| hsa-mir-142-3p | INCA     | 0.48 |
| hsa-mir-142-3p | IRAK3    | 0.49 |
| hsa-mir-142-3p | IRF5     | 0.45 |
| hsa-mir-142-3p | IRF8     | 0.39 |
| hsa-mir-142-3p | ITGA4    | 0.44 |
| hsa-mir-142-3p | ITGB2    | 0.52 |
| hsa-mir-142-3p | ITGB3    | 0.3  |

|                |           |      |
|----------------|-----------|------|
| hsa-mir-142-3p | ITGB5     | 0.44 |
| hsa-mir-142-3p | KCNE3     | 0.5  |
| hsa-mir-142-3p | KCNQ1     | 0.55 |
| hsa-mir-142-3p | KCTD12    | 0.5  |
| hsa-mir-142-3p | KIAA1949  | 0.51 |
| hsa-mir-142-3p | KLHL6     | 0.57 |
| hsa-mir-142-3p | KLRB1     | 0.44 |
| hsa-mir-142-3p | LAIR1     | 0.58 |
| hsa-mir-142-3p | LAMB1     | 0.4  |
| hsa-mir-142-3p | LAMP3     | 0.38 |
| hsa-mir-142-3p | LAPTM5    | 0.54 |
| hsa-mir-142-3p | LCP1      | 0.55 |
| hsa-mir-142-3p | LCP2      | 0.57 |
| hsa-mir-142-3p | LGALS9    | 0.5  |
| hsa-mir-142-3p | LHFPL2    | 0.58 |
| hsa-mir-142-3p | LILRB1    | 0.54 |
| hsa-mir-142-3p | LILRB2    | 0.55 |
| hsa-mir-142-3p | LILRB3    | 0.58 |
| hsa-mir-142-3p | LOC388335 | 0.46 |
| hsa-mir-142-3p | LPXN      | 0.53 |
| hsa-mir-142-3p | LRRC25    | 0.53 |
| hsa-mir-142-3p | LRRC8C    | 0.44 |
| hsa-mir-142-3p | LST1      | 0.43 |
| hsa-mir-142-3p | LTB       | 0.51 |
| hsa-mir-142-3p | LY75      | 0.53 |
| hsa-mir-142-3p | LY96      | 0.54 |
| hsa-mir-142-3p | LYZ       | 0.43 |
| hsa-mir-142-3p | MAFB      | 0.55 |
| hsa-mir-142-3p | MAN2B1    | 0.54 |
| hsa-mir-142-3p | MAP3K8    | 0.57 |
| hsa-mir-142-3p | MFNG      | 0.34 |
| hsa-mir-142-3p | MFSD1     | 0.56 |
| hsa-mir-142-3p | MGC24103  | 0.44 |
| hsa-mir-142-3p | MLKL      | 0.55 |
| hsa-mir-142-3p | MNDA      | 0.54 |
| hsa-mir-142-3p | MS4A4A    | 0.52 |
| hsa-mir-142-3p | MS4A6A    | 0.58 |
| hsa-mir-142-3p | MSR1      | 0.5  |
| hsa-mir-142-3p | MVP       | 0.51 |
| hsa-mir-142-3p | MYBPH     | 0.42 |
| hsa-mir-142-3p | MYO1F     | 0.54 |
| hsa-mir-142-3p | NAGA      | 0.59 |
| hsa-mir-142-3p | NCF1      | 0.49 |
| hsa-mir-142-3p | NCF2      | 0.53 |
| hsa-mir-142-3p | NCF4      | 0.43 |
| hsa-mir-142-3p | NCKAP1L   | 0.5  |
| hsa-mir-142-3p | NFKBIZ    | 0.39 |
| hsa-mir-142-3p | NKG7      | 0.49 |
| hsa-mir-142-3p | NLRC4     | 0.5  |
| hsa-mir-142-3p | NLRP3     | 0.48 |
| hsa-mir-142-3p | NOD2      | 0.56 |
| hsa-mir-142-3p | NPC2      | 0.59 |
| hsa-mir-142-3p | OBFC2A    | 0.42 |

|                |          |       |
|----------------|----------|-------|
| hsa-mir-142-3p | OGFRL1   | 0.49  |
| hsa-mir-142-3p | OSM      | 0.47  |
| hsa-mir-142-3p | P2RY5    | 0.39  |
| hsa-mir-142-3p | P2RY6    | 0.47  |
| hsa-mir-142-3p | PARP12   | 0.38  |
| hsa-mir-142-3p | PARP2    | -0.46 |
| hsa-mir-142-3p | PARVG    | 0.56  |
| hsa-mir-142-3p | PIK3CG   | 0.48  |
| hsa-mir-142-3p | PLCG2    | 0.59  |
| hsa-mir-142-3p | PLEK     | 0.53  |
| hsa-mir-142-3p | PLK3     | 0.48  |
| hsa-mir-142-3p | PLXDC2   | 0.55  |
| hsa-mir-142-3p | POLD4    | 0.55  |
| hsa-mir-142-3p | PRKCH    | 0.44  |
| hsa-mir-142-3p | PRSS23   | 0.37  |
| hsa-mir-142-3p | PSCD4    | 0.54  |
| hsa-mir-142-3p | PSCDBP   | 0.6   |
| hsa-mir-142-3p | PSMB10   | 0.45  |
| hsa-mir-142-3p | PTAFR    | 0.49  |
| hsa-mir-142-3p | PTGER4   | 0.52  |
| hsa-mir-142-3p | PTPLAD2  | 0.46  |
| hsa-mir-142-3p | PTPN2    | 0.53  |
| hsa-mir-142-3p | PTPN22   | 0.47  |
| hsa-mir-142-3p | PTPRC    | 0.58  |
| hsa-mir-142-3p | PYCARD   | 0.58  |
| hsa-mir-142-3p | RABGAP1L | 0.51  |
| hsa-mir-142-3p | RAC2     | 0.56  |
| hsa-mir-142-3p | RARRES1  | 0.41  |
| hsa-mir-142-3p | RCSD1    | 0.51  |
| hsa-mir-142-3p | RGS10    | 0.43  |
| hsa-mir-142-3p | RGS18    | 0.54  |
| hsa-mir-142-3p | RHBDF2   | 0.57  |
| hsa-mir-142-3p | RHOH     | 0.51  |
| hsa-mir-142-3p | RIN3     | 0.46  |
| hsa-mir-142-3p | RIPK3    | 0.49  |
| hsa-mir-142-3p | RNASE2   | 0.53  |
| hsa-mir-142-3p | RNASE3   | 0.51  |
| hsa-mir-142-3p | RNASET2  | 0.44  |
| hsa-mir-142-3p | RNF135   | 0.57  |
| hsa-mir-142-3p | RNF144B  | 0.55  |
| hsa-mir-142-3p | RNF149   | 0.46  |
| hsa-mir-142-3p | RPGRIP1  | 0.5   |
| hsa-mir-142-3p | RUNX3    | 0.51  |
| hsa-mir-142-3p | S100A11  | 0.56  |
| hsa-mir-142-3p | S100A8   | 0.48  |
| hsa-mir-142-3p | S100A9   | 0.44  |
| hsa-mir-142-3p | SAMSN1   | 0.48  |
| hsa-mir-142-3p | SAT1     | 0.52  |
| hsa-mir-142-3p | SCIN     | 0.49  |
| hsa-mir-142-3p | SCPEP1   | 0.55  |
| hsa-mir-142-3p | SELL     | 0.39  |
| hsa-mir-142-3p | SERPINB1 | 0.58  |
| hsa-mir-142-3p | SFRP4    | 0.37  |

|                |            |       |
|----------------|------------|-------|
| hsa-mir-142-3p | SFT2D2     | 0.49  |
| hsa-mir-142-3p | SH2B3      | 0.54  |
| hsa-mir-142-3p | SH3TC1     | 0.56  |
| hsa-mir-142-3p | SIGLEC7    | 0.53  |
| hsa-mir-142-3p | SIGLEC9    | 0.56  |
| hsa-mir-142-3p | SIPA1      | 0.49  |
| hsa-mir-142-3p | SLA        | 0.5   |
| hsa-mir-142-3p | SLAMF8     | 0.58  |
| hsa-mir-142-3p | SLC15A3    | 0.57  |
| hsa-mir-142-3p | SLC16A5    | 0.48  |
| hsa-mir-142-3p | SLC24A5    | -0.44 |
| hsa-mir-142-3p | SLC37A2    | 0.49  |
| hsa-mir-142-3p | SLC7A7     | 0.59  |
| hsa-mir-142-3p | SLCO2B1    | 0.51  |
| hsa-mir-142-3p | SLFN12     | 0.47  |
| hsa-mir-142-3p | SLFN13     | 0.31  |
| hsa-mir-142-3p | SOAT1      | 0.49  |
| hsa-mir-142-3p | SOD2       | 0.47  |
| hsa-mir-142-3p | SP110      | 0.48  |
| hsa-mir-142-3p | SP140      | 0.53  |
| hsa-mir-142-3p | SPI1       | 0.52  |
| hsa-mir-142-3p | SPP1       | 0.44  |
| hsa-mir-142-3p | SQRDL      | 0.6   |
| hsa-mir-142-3p | SRGN       | 0.49  |
| hsa-mir-142-3p | STAB1      | 0.47  |
| hsa-mir-142-3p | STX11      | 0.43  |
| hsa-mir-142-3p | SUMF1      | 0.56  |
| hsa-mir-142-3p | SYK        | 0.53  |
| hsa-mir-142-3p | SYTL3      | 0.53  |
| hsa-mir-142-3p | TAGAP      | 0.43  |
| hsa-mir-142-3p | TBC1D10C   | 0.56  |
| hsa-mir-142-3p | TBXAS1     | 0.49  |
| hsa-mir-142-3p | tcag7.1314 | 0.46  |
| hsa-mir-142-3p | TCIRG1     | 0.53  |
| hsa-mir-142-3p | TFEC       | 0.48  |
| hsa-mir-142-3p | TGFBR2     | 0.54  |
| hsa-mir-142-3p | THBD       | 0.5   |
| hsa-mir-142-3p | TLR1       | 0.53  |
| hsa-mir-142-3p | TLR2       | 0.58  |
| hsa-mir-142-3p | TLR3       | 0.44  |
| hsa-mir-142-3p | TLR5       | 0.56  |
| hsa-mir-142-3p | TLR6       | 0.54  |
| hsa-mir-142-3p | TLR7       | 0.47  |
| hsa-mir-142-3p | TLR8       | 0.5   |
| hsa-mir-142-3p | TMEM173    | 0.5   |
| hsa-mir-142-3p | TNFAIP3    | 0.48  |
| hsa-mir-142-3p | TNFAIP8    | 0.5   |
| hsa-mir-142-3p | TNFAIP8L2  | 0.51  |
| hsa-mir-142-3p | TNFRSF1B   | 0.5   |
| hsa-mir-142-3p | TNFSF13B   | 0.48  |
| hsa-mir-142-3p | TPK1       | 0.39  |
| hsa-mir-142-3p | TRAF3IP3   | 0.61  |
| hsa-mir-142-3p | TRIM38     | 0.5   |

|                |              |      |
|----------------|--------------|------|
| hsa-mir-142-3p | TRIM6        | 0.45 |
| hsa-mir-142-3p | TRIM6-TRIM34 | 0.47 |
| hsa-mir-142-3p | TTC7A        | 0.51 |
| hsa-mir-142-3p | TXNDC3       | 0.51 |
| hsa-mir-142-3p | URP2         | 0.54 |
| hsa-mir-142-3p | VAMP8        | 0.56 |
| hsa-mir-142-3p | VAV1         | 0.56 |
| hsa-mir-142-3p | VDR          | 0.52 |
| hsa-mir-142-3p | VMO1         | 0.48 |
| hsa-mir-142-3p | VNN2         | 0.44 |
| hsa-mir-142-3p | WDFY4        | 0.58 |
| hsa-mir-142-3p | WIPF1        | 0.57 |
| hsa-mir-142-5p | ABCA13       | 0.46 |
| hsa-mir-142-5p | ABI3         | 0.52 |
| hsa-mir-142-5p | ACPP         | 0.56 |
| hsa-mir-142-5p | ADAM28       | 0.45 |
| hsa-mir-142-5p | AIF1         | 0.52 |
| hsa-mir-142-5p | ALOX5        | 0.63 |
| hsa-mir-142-5p | ALPK1        | 0.56 |
| hsa-mir-142-5p | AMICA1       | 0.54 |
| hsa-mir-142-5p | AMPD3        | 0.5  |
| hsa-mir-142-5p | APBB1IP      | 0.46 |
| hsa-mir-142-5p | APOBEC3F     | 0.53 |
| hsa-mir-142-5p | APOBEC3H     | 0.55 |
| hsa-mir-142-5p | APOC1        | 0.44 |
| hsa-mir-142-5p | ARHGAP15     | 0.49 |
| hsa-mir-142-5p | ARHGAP30     | 0.66 |
| hsa-mir-142-5p | ARHGAP4      | 0.57 |
| hsa-mir-142-5p | ARHGAP9      | 0.62 |
| hsa-mir-142-5p | ARHGDIB      | 0.54 |
| hsa-mir-142-5p | ARL11        | 0.53 |
| hsa-mir-142-5p | ASCL2        | 0.48 |
| hsa-mir-142-5p | ATP8B4       | 0.47 |
| hsa-mir-142-5p | BATF         | 0.59 |
| hsa-mir-142-5p | BCL2A1       | 0.47 |
| hsa-mir-142-5p | BLNK         | 0.43 |
| hsa-mir-142-5p | BTK          | 0.46 |
| hsa-mir-142-5p | C10orf11     | 0.5  |
| hsa-mir-142-5p | C11orf45     | 0.5  |
| hsa-mir-142-5p | C17orf60     | 0.53 |
| hsa-mir-142-5p | C1orf162     | 0.5  |
| hsa-mir-142-5p | C1orf38      | 0.56 |
| hsa-mir-142-5p | C1QB         | 0.48 |
| hsa-mir-142-5p | C3AR1        | 0.52 |
| hsa-mir-142-5p | C5AR1        | 0.49 |
| hsa-mir-142-5p | C5orf29      | 0.52 |
| hsa-mir-142-5p | CACNA2D4     | 0.55 |
| hsa-mir-142-5p | CALML4       | 0.37 |
| hsa-mir-142-5p | CAMP         | 0.4  |
| hsa-mir-142-5p | CAPG         | 0.56 |
| hsa-mir-142-5p | CARD6        | 0.54 |
| hsa-mir-142-5p | CARD9        | 0.6  |
| hsa-mir-142-5p | CASP5        | 0.54 |

|                |          |       |
|----------------|----------|-------|
| hsa-mir-142-5p | CATSPER1 | 0.52  |
| hsa-mir-142-5p | CCL5     | 0.5   |
| hsa-mir-142-5p | CCR1     | 0.47  |
| hsa-mir-142-5p | CCR5     | 0.59  |
| hsa-mir-142-5p | CD14     | 0.51  |
| hsa-mir-142-5p | CD180    | 0.49  |
| hsa-mir-142-5p | CD2      | 0.57  |
| hsa-mir-142-5p | CD300A   | 0.45  |
| hsa-mir-142-5p | CD300LF  | 0.49  |
| hsa-mir-142-5p | CD302    | 0.53  |
| hsa-mir-142-5p | CD33     | 0.56  |
| hsa-mir-142-5p | CD37     | 0.51  |
| hsa-mir-142-5p | CD53     | 0.48  |
| hsa-mir-142-5p | CD68     | 0.44  |
| hsa-mir-142-5p | CD72     | 0.5   |
| hsa-mir-142-5p | CD84     | 0.47  |
| hsa-mir-142-5p | CDCP1    | 0.52  |
| hsa-mir-142-5p | CEACAM4  | 0.57  |
| hsa-mir-142-5p | CEBPB    | 0.46  |
| hsa-mir-142-5p | CEBPD    | 0.47  |
| hsa-mir-142-5p | CEBPE    | 0.48  |
| hsa-mir-142-5p | CENTA2   | 0.57  |
| hsa-mir-142-5p | CFB      | 0.43  |
| hsa-mir-142-5p | CFD      | 0.45  |
| hsa-mir-142-5p | CKB      | -0.52 |
| hsa-mir-142-5p | CLDN23   | 0.55  |
| hsa-mir-142-5p | CLEC4A   | 0.44  |
| hsa-mir-142-5p | CLEC4D   | 0.48  |
| hsa-mir-142-5p | CLEC7A   | 0.47  |
| hsa-mir-142-5p | CLECL1   | 0.53  |
| hsa-mir-142-5p | CMKLR1   | 0.46  |
| hsa-mir-142-5p | CMTM7    | 0.56  |
| hsa-mir-142-5p | COL8A2   | 0.5   |
| hsa-mir-142-5p | CPVL     | 0.52  |
| hsa-mir-142-5p | CST6     | 0.42  |
| hsa-mir-142-5p | CST7     | 0.49  |
| hsa-mir-142-5p | CSTA     | 0.62  |
| hsa-mir-142-5p | CTSB     | 0.43  |
| hsa-mir-142-5p | CTSC     | 0.53  |
| hsa-mir-142-5p | CTSS     | 0.51  |
| hsa-mir-142-5p | CTSZ     | 0.58  |
| hsa-mir-142-5p | CXorf21  | 0.5   |
| hsa-mir-142-5p | CXorf9   | 0.54  |
| hsa-mir-142-5p | CYBB     | 0.56  |
| hsa-mir-142-5p | DAB2     | 0.53  |
| hsa-mir-142-5p | DAPP1    | 0.45  |
| hsa-mir-142-5p | DEF6     | 0.57  |
| hsa-mir-142-5p | DENND1C  | 0.6   |
| hsa-mir-142-5p | DENND2D  | 0.58  |
| hsa-mir-142-5p | DENND3   | 0.46  |
| hsa-mir-142-5p | DOCK2    | 0.46  |
| hsa-mir-142-5p | DOCK8    | 0.56  |
| hsa-mir-142-5p | DOK3     | 0.64  |

|                |          |       |
|----------------|----------|-------|
| hsa-mir-142-5p | DPEP2    | 0.53  |
| hsa-mir-142-5p | DSE      | 0.59  |
| hsa-mir-142-5p | ECGF1    | 0.48  |
| hsa-mir-142-5p | EMB      | 0.5   |
| hsa-mir-142-5p | EMR1     | 0.45  |
| hsa-mir-142-5p | EVI2B    | 0.54  |
| hsa-mir-142-5p | F13A1    | 0.46  |
| hsa-mir-142-5p | FAM113B  | 0.62  |
| hsa-mir-142-5p | FAM20A   | 0.47  |
| hsa-mir-142-5p | FAM26F   | 0.5   |
| hsa-mir-142-5p | FAM78A   | 0.43  |
| hsa-mir-142-5p | FBP1     | 0.59  |
| hsa-mir-142-5p | FCER1G   | 0.52  |
| hsa-mir-142-5p | FCGBP    | 0.5   |
| hsa-mir-142-5p | FCGR2A   | 0.52  |
| hsa-mir-142-5p | FCGR2B   | 0.51  |
| hsa-mir-142-5p | FGD3     | 0.44  |
| hsa-mir-142-5p | FGFBP3   | -0.44 |
| hsa-mir-142-5p | FLI1     | 0.5   |
| hsa-mir-142-5p | FLJ20273 | 0.62  |
| hsa-mir-142-5p | FLJ21438 | 0.58  |
| hsa-mir-142-5p | FLJ22662 | 0.56  |
| hsa-mir-142-5p | FLVCR2   | 0.53  |
| hsa-mir-142-5p | FPRL1    | 0.43  |
| hsa-mir-142-5p | FPRL2    | 0.47  |
| hsa-mir-142-5p | FUCA1    | 0.49  |
| hsa-mir-142-5p | FXVD5    | 0.46  |
| hsa-mir-142-5p | FYB      | 0.56  |
| hsa-mir-142-5p | GAA      | 0.47  |
| hsa-mir-142-5p | GCNT1    | 0.5   |
| hsa-mir-142-5p | GDAP1L1  | -0.39 |
| hsa-mir-142-5p | GIMAP1   | 0.58  |
| hsa-mir-142-5p | GIMAP2   | 0.51  |
| hsa-mir-142-5p | GIMAP8   | 0.5   |
| hsa-mir-142-5p | GMFG     | 0.51  |
| hsa-mir-142-5p | GNGT2    | 0.54  |
| hsa-mir-142-5p | GPR18    | 0.47  |
| hsa-mir-142-5p | GPR65    | 0.47  |
| hsa-mir-142-5p | GPR84    | 0.5   |
| hsa-mir-142-5p | GPX1     | 0.47  |
| hsa-mir-142-5p | HAMP     | 0.51  |
| hsa-mir-142-5p | HAVCR2   | 0.53  |
| hsa-mir-142-5p | HCK      | 0.49  |
| hsa-mir-142-5p | HCLS1    | 0.59  |
| hsa-mir-142-5p | HCST     | 0.5   |
| hsa-mir-142-5p | HK3      | 0.44  |
| hsa-mir-142-5p | HLA-DMA  | 0.56  |
| hsa-mir-142-5p | HLA-DMB  | 0.43  |
| hsa-mir-142-5p | HLA-DOA  | 0.53  |
| hsa-mir-142-5p | HLA-DPA1 | 0.47  |
| hsa-mir-142-5p | HLA-DPB1 | 0.49  |
| hsa-mir-142-5p | HMHA1    | 0.57  |
| hsa-mir-142-5p | HPS3     | 0.47  |

|                |         |       |
|----------------|---------|-------|
| hsa-mir-142-5p | IER3    | 0.46  |
| hsa-mir-142-5p | IFI30   | 0.51  |
| hsa-mir-142-5p | IKZF1   | 0.53  |
| hsa-mir-142-5p | IL10    | 0.45  |
| hsa-mir-142-5p | IL10RA  | 0.57  |
| hsa-mir-142-5p | IL13RA1 | 0.59  |
| hsa-mir-142-5p | IL18    | 0.51  |
| hsa-mir-142-5p | IL1B    | 0.41  |
| hsa-mir-142-5p | IL21R   | 0.49  |
| hsa-mir-142-5p | IL2RA   | 0.5   |
| hsa-mir-142-5p | IL4R    | 0.55  |
| hsa-mir-142-5p | IL6     | 0.42  |
| hsa-mir-142-5p | IL7R    | 0.51  |
| hsa-mir-142-5p | IRAK3   | 0.51  |
| hsa-mir-142-5p | IRF5    | 0.46  |
| hsa-mir-142-5p | ITGB2   | 0.52  |
| hsa-mir-142-5p | KCNQ1   | 0.56  |
| hsa-mir-142-5p | KCTD12  | 0.5   |
| hsa-mir-142-5p | KLHL6   | 0.55  |
| hsa-mir-142-5p | KLRB1   | 0.47  |
| hsa-mir-142-5p | LACTB   | 0.38  |
| hsa-mir-142-5p | LAIR1   | 0.59  |
| hsa-mir-142-5p | LAPTM5  | 0.53  |
| hsa-mir-142-5p | LCP1    | 0.54  |
| hsa-mir-142-5p | LCP2    | 0.56  |
| hsa-mir-142-5p | LGALS9  | 0.51  |
| hsa-mir-142-5p | LILRB1  | 0.54  |
| hsa-mir-142-5p | LILRB2  | 0.52  |
| hsa-mir-142-5p | LILRB3  | 0.56  |
| hsa-mir-142-5p | LPXN    | 0.56  |
| hsa-mir-142-5p | LRRC25  | 0.55  |
| hsa-mir-142-5p | LRRC8C  | 0.46  |
| hsa-mir-142-5p | LST1    | 0.43  |
| hsa-mir-142-5p | LTB     | 0.51  |
| hsa-mir-142-5p | LY75    | 0.54  |
| hsa-mir-142-5p | LY96    | 0.53  |
| hsa-mir-142-5p | MAFB    | 0.55  |
| hsa-mir-142-5p | MAP3K8  | 0.58  |
| hsa-mir-142-5p | MERTK   | 0.44  |
| hsa-mir-142-5p | MFNG    | 0.35  |
| hsa-mir-142-5p | MFSD1   | 0.55  |
| hsa-mir-142-5p | MGAT4A  | 0.46  |
| hsa-mir-142-5p | MGC9913 | -0.32 |
| hsa-mir-142-5p | MLKL    | 0.54  |
| hsa-mir-142-5p | MNDA    | 0.54  |
| hsa-mir-142-5p | MS4A4A  | 0.51  |
| hsa-mir-142-5p | MS4A6A  | 0.57  |
| hsa-mir-142-5p | MSR1    | 0.48  |
| hsa-mir-142-5p | MVP     | 0.51  |
| hsa-mir-142-5p | MYBPH   | 0.41  |
| hsa-mir-142-5p | MYO1F   | 0.55  |
| hsa-mir-142-5p | NCF1    | 0.49  |
| hsa-mir-142-5p | NCF2    | 0.53  |



|                |           |       |
|----------------|-----------|-------|
| hsa-mir-142-5p | NCF4      | 0.43  |
| hsa-mir-142-5p | NCKAP1L   | 0.5   |
| hsa-mir-142-5p | NLRC4     | 0.5   |
| hsa-mir-142-5p | NLRP3     | 0.51  |
| hsa-mir-142-5p | NMU       | -0.26 |
| hsa-mir-142-5p | NOD2      | 0.6   |
| hsa-mir-142-5p | NPC2      | 0.59  |
| hsa-mir-142-5p | OGFRL1    | 0.49  |
| hsa-mir-142-5p | OSM       | 0.49  |
| hsa-mir-142-5p | P2RY5     | 0.37  |
| hsa-mir-142-5p | P2RY6     | 0.46  |
| hsa-mir-142-5p | PARP2     | -0.47 |
| hsa-mir-142-5p | PARVG     | 0.56  |
| hsa-mir-142-5p | PIK3CG    | 0.48  |
| hsa-mir-142-5p | PLB1      | 0.52  |
| hsa-mir-142-5p | PLCG2     | 0.6   |
| hsa-mir-142-5p | PLEK      | 0.52  |
| hsa-mir-142-5p | PLXDC2    | 0.55  |
| hsa-mir-142-5p | PMFBP1    | 0.52  |
| hsa-mir-142-5p | POLD4     | 0.56  |
| hsa-mir-142-5p | PSCD4     | 0.56  |
| hsa-mir-142-5p | PSCDBP    | 0.58  |
| hsa-mir-142-5p | PTAFR     | 0.5   |
| hsa-mir-142-5p | PTGER4    | 0.51  |
| hsa-mir-142-5p | PTOV1     | -0.41 |
| hsa-mir-142-5p | PTPLAD2   | 0.47  |
| hsa-mir-142-5p | PTPN2     | 0.55  |
| hsa-mir-142-5p | PTPN6     | 0.45  |
| hsa-mir-142-5p | PTPRC     | 0.57  |
| hsa-mir-142-5p | PYCARD    | 0.59  |
| hsa-mir-142-5p | RAB11FIP1 | 0.4   |
| hsa-mir-142-5p | RABGAP1L  | 0.53  |
| hsa-mir-142-5p | RAC2      | 0.54  |
| hsa-mir-142-5p | RCSD1     | 0.5   |
| hsa-mir-142-5p | RGS18     | 0.55  |
| hsa-mir-142-5p | RHBDF2    | 0.58  |
| hsa-mir-142-5p | RIN3      | 0.45  |
| hsa-mir-142-5p | RIPK3     | 0.49  |
| hsa-mir-142-5p | RNASE2    | 0.54  |
| hsa-mir-142-5p | RNASE3    | 0.54  |
| hsa-mir-142-5p | RNF130    | 0.47  |
| hsa-mir-142-5p | RNF135    | 0.56  |
| hsa-mir-142-5p | RNF144B   | 0.54  |
| hsa-mir-142-5p | RNF149    | 0.47  |
| hsa-mir-142-5p | RPGRIP1   | 0.53  |
| hsa-mir-142-5p | S100A11   | 0.53  |
| hsa-mir-142-5p | S100A8    | 0.48  |
| hsa-mir-142-5p | S100A9    | 0.44  |
| hsa-mir-142-5p | SAMSN1    | 0.47  |
| hsa-mir-142-5p | SAT1      | 0.53  |
| hsa-mir-142-5p | SCIN      | 0.48  |
| hsa-mir-142-5p | SCPEP1    | 0.58  |
| hsa-mir-142-5p | SERPINB1  | 0.57  |

|                |           |       |
|----------------|-----------|-------|
| hsa-mir-142-5p | SH3TC1    | 0.55  |
| hsa-mir-142-5p | SIGLEC7   | 0.52  |
| hsa-mir-142-5p | SIGLEC9   | 0.57  |
| hsa-mir-142-5p | SIPA1     | 0.5   |
| hsa-mir-142-5p | SLA       | 0.51  |
| hsa-mir-142-5p | SLAMF8    | 0.58  |
| hsa-mir-142-5p | SLC15A3   | 0.57  |
| hsa-mir-142-5p | SLC16A5   | 0.47  |
| hsa-mir-142-5p | SLC37A2   | 0.47  |
| hsa-mir-142-5p | SLC7A7    | 0.58  |
| hsa-mir-142-5p | SLCO2B1   | 0.52  |
| hsa-mir-142-5p | SLFN11    | 0.26  |
| hsa-mir-142-5p | SOD2      | 0.45  |
| hsa-mir-142-5p | SP140     | 0.54  |
| hsa-mir-142-5p | SPI1      | 0.52  |
| hsa-mir-142-5p | SQRDL     | 0.59  |
| hsa-mir-142-5p | SRGN      | 0.48  |
| hsa-mir-142-5p | STAB1     | 0.48  |
| hsa-mir-142-5p | SUMF1     | 0.58  |
| hsa-mir-142-5p | SWAP70    | 0.43  |
| hsa-mir-142-5p | SYK       | 0.55  |
| hsa-mir-142-5p | TBC1D10C  | 0.55  |
| hsa-mir-142-5p | TBXAS1    | 0.5   |
| hsa-mir-142-5p | TFEC      | 0.47  |
| hsa-mir-142-5p | THBD      | 0.5   |
| hsa-mir-142-5p | TLR1      | 0.52  |
| hsa-mir-142-5p | TLR2      | 0.55  |
| hsa-mir-142-5p | TLR5      | 0.59  |
| hsa-mir-142-5p | TLR6      | 0.55  |
| hsa-mir-142-5p | TLR8      | 0.48  |
| hsa-mir-142-5p | TMEM173   | 0.51  |
| hsa-mir-142-5p | TNFAIP3   | 0.46  |
| hsa-mir-142-5p | TNFAIP8   | 0.51  |
| hsa-mir-142-5p | TNFAIP8L2 | 0.54  |
| hsa-mir-142-5p | TNFRSF1B  | 0.49  |
| hsa-mir-142-5p | TNFSF13B  | 0.47  |
| hsa-mir-142-5p | TPP1      | 0.51  |
| hsa-mir-142-5p | TRAF3IP3  | 0.61  |
| hsa-mir-142-5p | TRIM38    | 0.49  |
| hsa-mir-142-5p | TRIM6     | 0.46  |
| hsa-mir-142-5p | TTC7A     | 0.52  |
| hsa-mir-142-5p | TXNDC3    | 0.54  |
| hsa-mir-142-5p | URP2      | 0.52  |
| hsa-mir-142-5p | VAMP8     | 0.58  |
| hsa-mir-142-5p | VAV1      | 0.58  |
| hsa-mir-142-5p | VDR       | 0.53  |
| hsa-mir-142-5p | VNN2      | 0.44  |
| hsa-mir-142-5p | WDFY4     | 0.58  |
| hsa-mir-142-5p | WIPF1     | 0.56  |
| hsa-mir-143    | C4orf32   | 0.5   |
| hsa-mir-143    | CHST9     | -0.27 |
| hsa-mir-143    | CNN1      | 0.27  |
| hsa-mir-143    | COL15A1   | 0.39  |

|             |           |          |
|-------------|-----------|----------|
| hsa-mir-143 | COL18A1   | 0.4      |
| hsa-mir-143 | COL1A1    | 0.32     |
| hsa-mir-143 | CORO1C    | -0.25    |
| hsa-mir-143 | CRB1      | -0.3     |
| hsa-mir-143 | CTHRC1    | 0.34     |
| hsa-mir-143 | DACH1     | -0.06    |
| hsa-mir-143 | DCN       | 0.46     |
| hsa-mir-143 | ESM1      | 0.36     |
| hsa-mir-143 | FOXC1     | 0.45     |
| hsa-mir-143 | FOXF2     | 0.35     |
| hsa-mir-143 | GPR124    | 0.58     |
| hsa-mir-143 | HTRA3     | 0.37     |
| hsa-mir-143 | LRRC32    | 0.37     |
| hsa-mir-143 | MSC       | 0.34     |
| hsa-mir-143 | NID2      | 0.38     |
| hsa-mir-143 | NPR1      | 0.34     |
| hsa-mir-143 | OGN       | 0.34     |
| hsa-mir-143 | OR4N2     | -0.33    |
| hsa-mir-143 | PDGFRB    | 0.46     |
| hsa-mir-143 | PRKCDBP   | 0.37     |
| hsa-mir-143 | PTGER2    | 0.35     |
| hsa-mir-143 | RGS5      | 0.43     |
| hsa-mir-143 | SPON2     | 0.35     |
| hsa-mir-143 | STRA6     | 0.42     |
| hsa-mir-143 | THBS2     | 0.36     |
| hsa-mir-143 | TMEM16A   | 0.37     |
| hsa-mir-143 | TPM2      | 0.33     |
| hsa-mir-144 | March1    | 0.09     |
| hsa-mir-144 | ANKRD7    | -0.07    |
| hsa-mir-144 | BLNK      | 0.14     |
| hsa-mir-144 | C11orf70  | 0.08     |
| hsa-mir-144 | C21orf100 | 0.07     |
| hsa-mir-144 | CAPN9     | -0.25    |
| hsa-mir-144 | DOCK1     | 0.09     |
| hsa-mir-144 | FA2H      | -0.13    |
| hsa-mir-144 | FAM135A   | 0.18     |
| hsa-mir-144 | HBA2      | 0.49     |
| hsa-mir-144 | HBB       | 0.33     |
| hsa-mir-144 | HBD       | 0.37     |
| hsa-mir-144 | HBM       | 0.31     |
| hsa-mir-144 | HBQ1      | 0.34     |
| hsa-mir-144 | IL18RAP   | 0.26     |
| hsa-mir-144 | LYZL1     | -0.06    |
| hsa-mir-144 | MAGEC2    | -0.2     |
| hsa-mir-144 | PAQR9     | -0.02    |
| hsa-mir-144 | PF4       | 0.42     |
| hsa-mir-144 | PNRC1     | 0.22     |
| hsa-mir-144 | PPBP      | 0.34     |
| hsa-mir-144 | PROK2     | 0.25     |
| hsa-mir-144 | PRPH      | 1.25E-05 |
| hsa-mir-144 | PRSS35    | 0.01     |
| hsa-mir-144 | RPGRIP1   | 0.1      |
| hsa-mir-144 | S100A12   | 0.31     |

|             |          |       |
|-------------|----------|-------|
| hsa-mir-144 | SEMG1    | 0.04  |
| hsa-mir-144 | SPINK5   | -0.24 |
| hsa-mir-144 | TAGAP    | 0.24  |
| hsa-mir-144 | YBX2     | -0.16 |
| hsa-mir-145 | AIM2     | -0.01 |
| hsa-mir-145 | ASS1     | 0.19  |
| hsa-mir-145 | BFSP1    | 0.3   |
| hsa-mir-145 | C16orf30 | 0.42  |
| hsa-mir-145 | C3orf55  | 0.22  |
| hsa-mir-145 | C4orf32  | 0.53  |
| hsa-mir-145 | C6orf189 | 0.34  |
| hsa-mir-145 | CA5A     | 0.2   |
| hsa-mir-145 | CCDC3    | 0.46  |
| hsa-mir-145 | CD248    | 0.38  |
| hsa-mir-145 | COL12A1  | 0.33  |
| hsa-mir-145 | COL1A1   | 0.31  |
| hsa-mir-145 | COL1A2   | 0.32  |
| hsa-mir-145 | COL3A1   | 0.28  |
| hsa-mir-145 | CYYR1    | 0.39  |
| hsa-mir-145 | DCN      | 0.47  |
| hsa-mir-145 | DSP      | 0.28  |
| hsa-mir-145 | DYSF     | 0.38  |
| hsa-mir-145 | ESM1     | 0.33  |
| hsa-mir-145 | FHL2     | 0.22  |
| hsa-mir-145 | FKBP7    | 0.23  |
| hsa-mir-145 | FLJ22655 | 0.27  |
| hsa-mir-145 | FZD10    | 0.32  |
| hsa-mir-145 | GATA6    | 0.18  |
| hsa-mir-145 | GLT8D2   | 0.3   |
| hsa-mir-145 | GPR124   | 0.56  |
| hsa-mir-145 | GUCY1A3  | 0.37  |
| hsa-mir-145 | HEYL     | 0.37  |
| hsa-mir-145 | HIGD1B   | 0.16  |
| hsa-mir-145 | HTR1F    | 0.43  |
| hsa-mir-145 | HTRA3    | 0.33  |
| hsa-mir-145 | ITGA11   | 0.4   |
| hsa-mir-145 | KDEL3    | 0.29  |
| hsa-mir-145 | LRRC32   | 0.37  |
| hsa-mir-145 | LTBP1    | 0.05  |
| hsa-mir-145 | LXN      | 0.29  |
| hsa-mir-145 | MOXD1    | 0.17  |
| hsa-mir-145 | NGEF     | 0     |
| hsa-mir-145 | NID2     | 0.34  |
| hsa-mir-145 | NOX4     | 0.16  |
| hsa-mir-145 | OGN      | 0.41  |
| hsa-mir-145 | PDGFRB   | 0.44  |
| hsa-mir-145 | PLAC9    | 0.4   |
| hsa-mir-145 | PLK2     | 0.33  |
| hsa-mir-145 | PPEF1    | 0.43  |
| hsa-mir-145 | PRKCDBP  | 0.37  |
| hsa-mir-145 | PRR16    | 0.42  |
| hsa-mir-145 | PRRX2    | 0.19  |
| hsa-mir-145 | PTPRB    | 0.31  |

|              |          |       |
|--------------|----------|-------|
| hsa-mir-145  | QPCT     | 0.37  |
| hsa-mir-145  | RGS5     | 0.45  |
| hsa-mir-145  | SLITRK4  | 0.06  |
| hsa-mir-145  | SOX5     | -0.2  |
| hsa-mir-145  | SPON2    | 0.32  |
| hsa-mir-145  | STRA6    | 0.4   |
| hsa-mir-145  | TEK      | 0.3   |
| hsa-mir-145  | TES      | 0.38  |
| hsa-mir-145  | TFPI2    | 0.05  |
| hsa-mir-145  | THBS2    | 0.38  |
| hsa-mir-145  | TMEM16A  | 0.35  |
| hsa-mir-145  | TMEM16B  | 0.37  |
| hsa-mir-145  | VIT      | 0.24  |
| hsa-mir-145  | ZP1      | 0.22  |
| hsa-mir-146a | ATAD3C   | -0.06 |
| hsa-mir-146a | CETP     | 0.4   |
| hsa-mir-146a | DPEP1    | 0.26  |
| hsa-mir-146a | ETV5     | 0.15  |
| hsa-mir-146a | FAM124B  | 0.28  |
| hsa-mir-146a | FBXO32   | 0.14  |
| hsa-mir-146a | FOXF2    | 0.25  |
| hsa-mir-146a | HDAC2    | -0.27 |
| hsa-mir-146a | LRRC36   | 0.21  |
| hsa-mir-146a | NEFL     | -0.01 |
| hsa-mir-146a | SEMA7A   | 0.22  |
| hsa-mir-146b | ABCA13   | 0.48  |
| hsa-mir-146b | ABCC3    | 0.55  |
| hsa-mir-146b | ADAM8    | 0.44  |
| hsa-mir-146b | ADAMTS1  | 0.38  |
| hsa-mir-146b | ADFP     | 0.39  |
| hsa-mir-146b | ALOX5    | 0.51  |
| hsa-mir-146b | ALOX5AP  | 0.42  |
| hsa-mir-146b | ANXA4    | 0.51  |
| hsa-mir-146b | APOBEC3C | 0.55  |
| hsa-mir-146b | APOBEC3F | 0.57  |
| hsa-mir-146b | AQP9     | 0.51  |
| hsa-mir-146b | ARHGAP30 | 0.5   |
| hsa-mir-146b | ARSJ     | 0.47  |
| hsa-mir-146b | ASPN     | 0.42  |
| hsa-mir-146b | ATP8B4   | 0.38  |
| hsa-mir-146b | BANK1    | 0.28  |
| hsa-mir-146b | BATF     | 0.5   |
| hsa-mir-146b | BCL2A1   | 0.38  |
| hsa-mir-146b | BCL3     | 0.47  |
| hsa-mir-146b | BIRC3    | 0.44  |
| hsa-mir-146b | BRI3     | 0.4   |
| hsa-mir-146b | C11orf45 | 0.43  |
| hsa-mir-146b | C17orf60 | 0.43  |
| hsa-mir-146b | C1orf34  | 0.47  |
| hsa-mir-146b | C1RL     | 0.6   |
| hsa-mir-146b | C1S      | 0.55  |
| hsa-mir-146b | C3AR1    | 0.43  |
| hsa-mir-146b | C5AR1    | 0.55  |

|              |         |       |
|--------------|---------|-------|
| hsa-mir-146b | C5orf29 | 0.46  |
| hsa-mir-146b | C9orf52 | 0.49  |
| hsa-mir-146b | CAMP    | 0.4   |
| hsa-mir-146b | CARD6   | 0.46  |
| hsa-mir-146b | CASP1   | 0.45  |
| hsa-mir-146b | CASP4   | 0.5   |
| hsa-mir-146b | CASP5   | 0.54  |
| hsa-mir-146b | CASP7   | 0.44  |
| hsa-mir-146b | CAST    | 0.55  |
| hsa-mir-146b | CBLN1   | -0.48 |
| hsa-mir-146b | CCL13   | 0.36  |
| hsa-mir-146b | CCL20   | 0.33  |
| hsa-mir-146b | CCL7    | 0.43  |
| hsa-mir-146b | CCL8    | 0.32  |
| hsa-mir-146b | CCR5    | 0.52  |
| hsa-mir-146b | CD44    | 0.51  |
| hsa-mir-146b | CD72    | 0.48  |
| hsa-mir-146b | CDCP1   | 0.46  |
| hsa-mir-146b | CDKN1A  | 0.42  |
| hsa-mir-146b | CEACAM4 | 0.48  |
| hsa-mir-146b | CEBPD   | 0.49  |
| hsa-mir-146b | CEBPE   | 0.57  |
| hsa-mir-146b | CFB     | 0.47  |
| hsa-mir-146b | CFH     | 0.45  |
| hsa-mir-146b | CFHR3   | 0.43  |
| hsa-mir-146b | CHI3L1  | 0.46  |
| hsa-mir-146b | CHIT1   | 0.44  |
| hsa-mir-146b | CLCF1   | 0.49  |
| hsa-mir-146b | CLDN23  | 0.58  |
| hsa-mir-146b | CLEC5A  | 0.52  |
| hsa-mir-146b | COL8A2  | 0.47  |
| hsa-mir-146b | CPD     | 0.46  |
| hsa-mir-146b | CPXM2   | 0.18  |
| hsa-mir-146b | CSTA    | 0.54  |
| hsa-mir-146b | CTSS    | 0.43  |
| hsa-mir-146b | CYBRD1  | 0.41  |
| hsa-mir-146b | DDIT4L  | 0.43  |
| hsa-mir-146b | DENND2D | 0.53  |
| hsa-mir-146b | DHX58   | 0.44  |
| hsa-mir-146b | DIRAS3  | 0.43  |
| hsa-mir-146b | DPYD    | 0.52  |
| hsa-mir-146b | DRAM    | 0.56  |
| hsa-mir-146b | DUSP1   | 0.42  |
| hsa-mir-146b | EBI2    | 0.44  |
| hsa-mir-146b | EFEMP1  | 0.52  |
| hsa-mir-146b | EID3    | 0.25  |
| hsa-mir-146b | ETV7    | 0.51  |
| hsa-mir-146b | F11R    | 0.5   |
| hsa-mir-146b | F13A1   | 0.47  |
| hsa-mir-146b | FAM20A  | 0.4   |
| hsa-mir-146b | FAM26B  | 0.46  |
| hsa-mir-146b | FAS     | 0.47  |
| hsa-mir-146b | FBP1    | 0.46  |

|              |           |      |
|--------------|-----------|------|
| hsa-mir-146b | FCGR2B    | 0.53 |
| hsa-mir-146b | FER1L3    | 0.53 |
| hsa-mir-146b | FES       | 0.55 |
| hsa-mir-146b | FGFBP3    | -0.4 |
| hsa-mir-146b | FGL2      | 0.41 |
| hsa-mir-146b | FKBP5     | 0.45 |
| hsa-mir-146b | FKBP9L    | 0.42 |
| hsa-mir-146b | FLJ20273  | 0.62 |
| hsa-mir-146b | FLVCR2    | 0.49 |
| hsa-mir-146b | FMOD      | 0.44 |
| hsa-mir-146b | FOSL2     | 0.44 |
| hsa-mir-146b | FPRL1     | 0.48 |
| hsa-mir-146b | FUCA1     | 0.45 |
| hsa-mir-146b | FYCO1     | 0.4  |
| hsa-mir-146b | GBP5      | 0.5  |
| hsa-mir-146b | GCNT1     | 0.47 |
| hsa-mir-146b | GEM       | 0.43 |
| hsa-mir-146b | GFPT2     | 0.32 |
| hsa-mir-146b | GIMAP1    | 0.44 |
| hsa-mir-146b | GIMAP2    | 0.47 |
| hsa-mir-146b | GIMAP5    | 0.37 |
| hsa-mir-146b | GIMAP7    | 0.44 |
| hsa-mir-146b | GNS       | 0.49 |
| hsa-mir-146b | GPNMB     | 0.38 |
| hsa-mir-146b | GPR65     | 0.42 |
| hsa-mir-146b | GPR84     | 0.49 |
| hsa-mir-146b | HEBP1     | 0.45 |
| hsa-mir-146b | HK3       | 0.47 |
| hsa-mir-146b | HLA-DOA   | 0.47 |
| hsa-mir-146b | HPS3      | 0.44 |
| hsa-mir-146b | HRH1      | 0.48 |
| hsa-mir-146b | IBSP      | 0.43 |
| hsa-mir-146b | IFI30     | 0.44 |
| hsa-mir-146b | IL13RA1   | 0.52 |
| hsa-mir-146b | IL1A      | 0.45 |
| hsa-mir-146b | IL2RA     | 0.52 |
| hsa-mir-146b | IL7R      | 0.42 |
| hsa-mir-146b | INCA      | 0.5  |
| hsa-mir-146b | IQCG      | 0.39 |
| hsa-mir-146b | IRAK3     | 0.46 |
| hsa-mir-146b | KCNMB1    | 0.49 |
| hsa-mir-146b | KCTD12    | 0.39 |
| hsa-mir-146b | KDELR3    | 0.41 |
| hsa-mir-146b | KLRB1     | 0.43 |
| hsa-mir-146b | LAIR1     | 0.48 |
| hsa-mir-146b | LAMA2     | 0.43 |
| hsa-mir-146b | LCTL      | 0.5  |
| hsa-mir-146b | LHFPL2    | 0.49 |
| hsa-mir-146b | LILRB2    | 0.55 |
| hsa-mir-146b | LILRB3    | 0.5  |
| hsa-mir-146b | LOC221091 | 0.4  |
| hsa-mir-146b | LOC388335 | 0.42 |
| hsa-mir-146b | LOX       | 0.42 |

|              |         |       |
|--------------|---------|-------|
| hsa-mir-146b | LRRC25  | 0.51  |
| hsa-mir-146b | MAFB    | 0.44  |
| hsa-mir-146b | MAN1C1  | 0.44  |
| hsa-mir-146b | MAP3K8  | 0.48  |
| hsa-mir-146b | MARCO   | 0.49  |
| hsa-mir-146b | MDFIC   | 0.46  |
| hsa-mir-146b | MERTK   | 0.36  |
| hsa-mir-146b | METRNL  | 0.51  |
| hsa-mir-146b | MFSD1   | 0.47  |
| hsa-mir-146b | MFSD7   | 0.48  |
| hsa-mir-146b | MGC7036 | 0.52  |
| hsa-mir-146b | MLKL    | 0.43  |
| hsa-mir-146b | MMP19   | 0.45  |
| hsa-mir-146b | MNDA    | 0.46  |
| hsa-mir-146b | MR1     | 0.53  |
| hsa-mir-146b | MSR1    | 0.49  |
| hsa-mir-146b | MST150  | 0.52  |
| hsa-mir-146b | MT1B    | 0.45  |
| hsa-mir-146b | MT1G    | 0.45  |
| hsa-mir-146b | MT1H    | 0.46  |
| hsa-mir-146b | MT1JP   | 0.41  |
| hsa-mir-146b | MT1M    | 0.31  |
| hsa-mir-146b | MYCN    | -0.49 |
| hsa-mir-146b | NCF1    | 0.43  |
| hsa-mir-146b | NCF2    | 0.48  |
| hsa-mir-146b | NEURL2  | 0.43  |
| hsa-mir-146b | NFKBIZ  | 0.43  |
| hsa-mir-146b | NLRC4   | 0.45  |
| hsa-mir-146b | NOD2    | 0.55  |
| hsa-mir-146b | OGFRL1  | 0.4   |
| hsa-mir-146b | OSM     | 0.43  |
| hsa-mir-146b | PAM     | 0.39  |
| hsa-mir-146b | PBEF1   | 0.49  |
| hsa-mir-146b | PDLIM4  | 0.39  |
| hsa-mir-146b | PGCP    | 0.44  |
| hsa-mir-146b | PI3     | 0.41  |
| hsa-mir-146b | PLA2G5  | 0.44  |
| hsa-mir-146b | PLB1    | 0.49  |
| hsa-mir-146b | PLTP    | 0.46  |
| hsa-mir-146b | PPIC    | 0.48  |
| hsa-mir-146b | PSCDBP  | 0.47  |
| hsa-mir-146b | PTPN2   | 0.45  |
| hsa-mir-146b | RARRES1 | 0.4   |
| hsa-mir-146b | RDH10   | 0.46  |
| hsa-mir-146b | RGS18   | 0.43  |
| hsa-mir-146b | RNASE2  | 0.49  |
| hsa-mir-146b | RNF149  | 0.41  |
| hsa-mir-146b | RPGRIP1 | 0.36  |
| hsa-mir-146b | S100A10 | 0.4   |
| hsa-mir-146b | SAA1    | 0.43  |
| hsa-mir-146b | SAA2    | 0.42  |
| hsa-mir-146b | SAT1    | 0.5   |
| hsa-mir-146b | SCPEP1  | 0.48  |



|              |              |       |
|--------------|--------------|-------|
| hsa-mir-146b | SEC24D       | 0.48  |
| hsa-mir-146b | SERPINB1     | 0.46  |
| hsa-mir-146b | SERPING1     | 0.48  |
| hsa-mir-146b | SH3TC1       | 0.42  |
| hsa-mir-146b | SLA          | 0.44  |
| hsa-mir-146b | SLAMF8       | 0.54  |
| hsa-mir-146b | SLC11A1      | 0.52  |
| hsa-mir-146b | SLC16A10     | 0.36  |
| hsa-mir-146b | SLC22A4      | 0.32  |
| hsa-mir-146b | SLC24A5      | -0.47 |
| hsa-mir-146b | SLC33A1      | 0.38  |
| hsa-mir-146b | SLC39A8      | 0.46  |
| hsa-mir-146b | SLC7A7       | 0.49  |
| hsa-mir-146b | SOCS3        | 0.45  |
| hsa-mir-146b | SOD2         | 0.5   |
| hsa-mir-146b | SPOCD1       | 0.48  |
| hsa-mir-146b | SQRDL        | 0.5   |
| hsa-mir-146b | SRGN         | 0.4   |
| hsa-mir-146b | SRPX2        | 0.46  |
| hsa-mir-146b | STAB1        | 0.49  |
| hsa-mir-146b | STMN1        | -0.48 |
| hsa-mir-146b | SUMF1        | 0.57  |
| hsa-mir-146b | SWAP70       | 0.47  |
| hsa-mir-146b | SYK          | 0.39  |
| hsa-mir-146b | SYTL3        | 0.5   |
| hsa-mir-146b | tcag7.1314   | 0.51  |
| hsa-mir-146b | THBD         | 0.45  |
| hsa-mir-146b | TIMP1        | 0.48  |
| hsa-mir-146b | TLR2         | 0.42  |
| hsa-mir-146b | TLR8         | 0.46  |
| hsa-mir-146b | TNFRSF10B    | 0.47  |
| hsa-mir-146b | TPP1         | 0.52  |
| hsa-mir-146b | TREM1        | 0.5   |
| hsa-mir-146b | TRIM22       | 0.46  |
| hsa-mir-146b | TRIM38       | 0.46  |
| hsa-mir-146b | TRIM6        | 0.5   |
| hsa-mir-146b | TRIM6-TRIM34 | 0.52  |
| hsa-mir-146b | TXLNB        | 0.32  |
| hsa-mir-146b | VASN         | 0.42  |
| hsa-mir-146b | VDR          | 0.56  |
| hsa-mir-146b | VMO1         | 0.46  |
| hsa-mir-146b | VNN2         | 0.43  |
| hsa-mir-146b | WDFY4        | 0.43  |
| hsa-mir-146b | ZDHHC22      | -0.5  |
| hsa-mir-146b | ZNF74        | -0.46 |
| hsa-mir-148a | ABCC3        | 0.45  |
| hsa-mir-148a | AEBP1        | 0.34  |
| hsa-mir-148a | ANXA13       | 0.38  |
| hsa-mir-148a | APOBEC3F     | 0.47  |
| hsa-mir-148a | ATP5C1       | -0.32 |
| hsa-mir-148a | B3GNT5       | 0.44  |
| hsa-mir-148a | BCL3         | 0.34  |
| hsa-mir-148a | BCMO1        | 0.4   |

|              |          |       |
|--------------|----------|-------|
| hsa-mir-148a | BOC      | 0.39  |
| hsa-mir-148a | C11orf63 | 0.42  |
| hsa-mir-148a | C1RL     | 0.42  |
| hsa-mir-148a | C21orf62 | 0.46  |
| hsa-mir-148a | C6orf118 | 0.27  |
| hsa-mir-148a | C7orf31  | 0.4   |
| hsa-mir-148a | C8orf32  | -0.26 |
| hsa-mir-148a | C9orf125 | -0.41 |
| hsa-mir-148a | CA12     | 0.4   |
| hsa-mir-148a | CALD1    | 0.36  |
| hsa-mir-148a | CBLN1    | -0.47 |
| hsa-mir-148a | CCDC140  | 0.29  |
| hsa-mir-148a | CCDC46   | 0.46  |
| hsa-mir-148a | CCDC89   | 0.48  |
| hsa-mir-148a | CHCHD2   | 0.25  |
| hsa-mir-148a | CLCN5    | 0.47  |
| hsa-mir-148a | CUEDC2   | -0.33 |
| hsa-mir-148a | CYP4V2   | 0.35  |
| hsa-mir-148a | DDIT4L   | 0.43  |
| hsa-mir-148a | DKK1     | 0.21  |
| hsa-mir-148a | DNAH9    | 0.47  |
| hsa-mir-148a | ECOP     | 0.24  |
| hsa-mir-148a | EFEMP1   | 0.44  |
| hsa-mir-148a | EGFR     | 0.24  |
| hsa-mir-148a | ELN      | 0.39  |
| hsa-mir-148a | EVC      | 0.44  |
| hsa-mir-148a | EVC2     | 0.45  |
| hsa-mir-148a | F11R     | 0.35  |
| hsa-mir-148a | FA2H     | -0.32 |
| hsa-mir-148a | FAM137B  | 0.29  |
| hsa-mir-148a | FCGR2B   | 0.41  |
| hsa-mir-148a | FKBP9    | 0.46  |
| hsa-mir-148a | FKBP9L   | 0.46  |
| hsa-mir-148a | FLJ21511 | 0.28  |
| hsa-mir-148a | FLNC     | 0.27  |
| hsa-mir-148a | FMO4     | 0.49  |
| hsa-mir-148a | FMOD     | 0.48  |
| hsa-mir-148a | FSTL5    | -0.27 |
| hsa-mir-148a | G0S2     | 0.33  |
| hsa-mir-148a | GBAS     | 0.17  |
| hsa-mir-148a | GBP5     | 0.4   |
| hsa-mir-148a | GJB2     | 0.31  |
| hsa-mir-148a | GNA12    | 0.33  |
| hsa-mir-148a | HGF      | 0.2   |
| hsa-mir-148a | HOXA3    | 0.38  |
| hsa-mir-148a | HOXA4    | 0.36  |
| hsa-mir-148a | HOXA5    | 0.43  |
| hsa-mir-148a | HOXC9    | 0.25  |
| hsa-mir-148a | HSPA6    | 0.32  |
| hsa-mir-148a | HSPB1    | 0.48  |
| hsa-mir-148a | HSPB3    | -0.27 |
| hsa-mir-148a | IL7      | 0.39  |
| hsa-mir-148a | IRX2     | -0.26 |

|              |            |       |
|--------------|------------|-------|
| hsa-mir-148a | JPH3       | -0.31 |
| hsa-mir-148a | KCNE4      | 0.3   |
| hsa-mir-148a | KHDRBS2    | -0.38 |
| hsa-mir-148a | KLRC2      | -0.3  |
| hsa-mir-148a | LINCR      | 0.36  |
| hsa-mir-148a | LOC493869  | 0.42  |
| hsa-mir-148a | LTF        | 0.29  |
| hsa-mir-148a | Magmas     | -0.12 |
| hsa-mir-148a | MAL2       | -0.27 |
| hsa-mir-148a | MCFD2      | 0.4   |
| hsa-mir-148a | MEOX2      | 0.38  |
| hsa-mir-148a | MFAP4      | 0.39  |
| hsa-mir-148a | MGC87315   | 0.28  |
| hsa-mir-148a | MTTP       | 0.28  |
| hsa-mir-148a | MYBPH      | 0.33  |
| hsa-mir-148a | MYCBPAP    | 0.49  |
| hsa-mir-148a | NDUFA11    | -0.26 |
| hsa-mir-148a | NFE2L3     | 0.42  |
| hsa-mir-148a | NNMT       | 0.37  |
| hsa-mir-148a | NPM2       | -0.36 |
| hsa-mir-148a | NPY2R      | 0.12  |
| hsa-mir-148a | OCIAD2     | 0.25  |
| hsa-mir-148a | PARP12     | 0.44  |
| hsa-mir-148a | PBEF1      | 0.36  |
| hsa-mir-148a | PCSK5      | 0.3   |
| hsa-mir-148a | PFN4       | 0.47  |
| hsa-mir-148a | POSTN      | 0.23  |
| hsa-mir-148a | PPIC       | 0.49  |
| hsa-mir-148a | PTPN12     | 0.38  |
| hsa-mir-148a | RANBP17    | -0.42 |
| hsa-mir-148a | RBP1       | 0.34  |
| hsa-mir-148a | RIBC1      | 0.38  |
| hsa-mir-148a | RNASE4     | 0.35  |
| hsa-mir-148a | RPA3       | 0.24  |
| hsa-mir-148a | S100A2     | 0.47  |
| hsa-mir-148a | SAA1       | 0.31  |
| hsa-mir-148a | SCUBE2     | 0.31  |
| hsa-mir-148a | SEC61G     | 0.22  |
| hsa-mir-148a | SERPING1   | 0.39  |
| hsa-mir-148a | SH3BGR     | 0.37  |
| hsa-mir-148a | SHOX2      | 0.32  |
| hsa-mir-148a | SKAP2      | 0.42  |
| hsa-mir-148a | SNX10      | 0.25  |
| hsa-mir-148a | SPAG1      | 0.39  |
| hsa-mir-148a | SPAG17     | 0.4   |
| hsa-mir-148a | SRPX       | 0.37  |
| hsa-mir-148a | tcag7.1136 | 0.43  |
| hsa-mir-148a | tcag7.1314 | 0.45  |
| hsa-mir-148a | TCTEX1D1   | 0.34  |
| hsa-mir-148a | TMEM121    | -0.37 |
| hsa-mir-148a | TRIP6      | 0.44  |
| hsa-mir-148a | TSLP       | 0.28  |
| hsa-mir-148a | UNQ9433    | -0.19 |

|              |           |       |
|--------------|-----------|-------|
| hsa-mir-148a | VASN      | 0.35  |
| hsa-mir-148a | VIM       | 0.35  |
| hsa-mir-148a | WDR63     | 0.41  |
| hsa-mir-148a | WDR78     | 0.41  |
| hsa-mir-148a | WISP1     | 0.34  |
| hsa-mir-148a | XKR8      | 0.42  |
| hsa-mir-148a | ZBTB6     | -0.31 |
| hsa-mir-148a | ZRF1      | 0.29  |
| hsa-mir-148b | C14orf101 | -0.13 |
| hsa-mir-148b | LEMD1     | 0.02  |
| hsa-mir-148b | RASEF     | 0     |
| hsa-mir-148b | STXBP6    | -0.03 |
| hsa-mir-149  | ACP5      | -0.38 |
| hsa-mir-149  | ARPP-21   | 0.33  |
| hsa-mir-149  | ATP6V1G2  | 0.4   |
| hsa-mir-149  | BEX1      | 0.37  |
| hsa-mir-149  | BMF       | -0.39 |
| hsa-mir-149  | CAMK1     | 0.28  |
| hsa-mir-149  | CAMKV     | 0.35  |
| hsa-mir-149  | CCK       | 0.2   |
| hsa-mir-149  | CDH18     | 0.23  |
| hsa-mir-149  | CHRM2     | 0.4   |
| hsa-mir-149  | CHRM3     | 0.36  |
| hsa-mir-149  | CSTA      | -0.38 |
| hsa-mir-149  | DYNC111   | 0.16  |
| hsa-mir-149  | FGF13     | 0.21  |
| hsa-mir-149  | GPNMB     | -0.27 |
| hsa-mir-149  | IFI30     | -0.34 |
| hsa-mir-149  | KIAA0888  | 0.3   |
| hsa-mir-149  | LUZP2     | 0.19  |
| hsa-mir-149  | MAGEE1    | 0.27  |
| hsa-mir-149  | MAN2B1    | -0.38 |
| hsa-mir-149  | MLKL      | -0.4  |
| hsa-mir-149  | MMP7      | -0.26 |
| hsa-mir-149  | NEXN      | -0.27 |
| hsa-mir-149  | NGEF      | 0.35  |
| hsa-mir-149  | RNF157    | 0.27  |
| hsa-mir-149  | RTN4R     | 0.36  |
| hsa-mir-149  | SH3GL3    | 0.22  |
| hsa-mir-149  | SYNPR     | 0.26  |
| hsa-mir-149  | SYT13     | 0.25  |
| hsa-mir-149  | TCEAL5    | 0.35  |
| hsa-mir-149  | TTYH1     | 0.36  |
| hsa-mir-149  | TUBB3     | 0.41  |
| hsa-mir-149  | ZCCHC12   | 0.39  |
| hsa-mir-151  | BBOX1     | -0.14 |
| hsa-mir-151  | CCL5      | -0.3  |
| hsa-mir-151  | CXCL14    | -0.26 |
| hsa-mir-151  | PRSS12    | 0.02  |
| hsa-mir-151  | SOCS1     | -0.36 |
| hsa-mir-151  | ZNF516    | 0.21  |
| hsa-mir-152  | ABCC3     | 0.45  |
| hsa-mir-152  | ACOX2     | 0.53  |

|             |          |       |
|-------------|----------|-------|
| hsa-mir-152 | AIFM2    | 0.46  |
| hsa-mir-152 | ALS2CR13 | -0.46 |
| hsa-mir-152 | AMDHD1   | 0.09  |
| hsa-mir-152 | ANGPTL1  | 0.31  |
| hsa-mir-152 | ANXA1    | 0.5   |
| hsa-mir-152 | ANXA4    | 0.51  |
| hsa-mir-152 | ASPN     | 0.42  |
| hsa-mir-152 | BCL7A    | -0.48 |
| hsa-mir-152 | BDH2     | 0.45  |
| hsa-mir-152 | C10orf65 | 0.44  |
| hsa-mir-152 | C1orf34  | 0.44  |
| hsa-mir-152 | C21orf13 | 0.41  |
| hsa-mir-152 | C4orf18  | 0.35  |
| hsa-mir-152 | C9orf125 | -0.46 |
| hsa-mir-152 | CAST     | 0.49  |
| hsa-mir-152 | CBLN1    | -0.47 |
| hsa-mir-152 | CCDC89   | 0.45  |
| hsa-mir-152 | CD34     | 0.44  |
| hsa-mir-152 | CFH      | 0.45  |
| hsa-mir-152 | CFHR3    | 0.42  |
| hsa-mir-152 | CHPT1    | 0.39  |
| hsa-mir-152 | CMYA5    | 0.38  |
| hsa-mir-152 | COPZ2    | 0.57  |
| hsa-mir-152 | CYBRD1   | 0.54  |
| hsa-mir-152 | DBX2     | 0.4   |
| hsa-mir-152 | DDIT4L   | 0.45  |
| hsa-mir-152 | DDR2     | 0.39  |
| hsa-mir-152 | DHX58    | 0.4   |
| hsa-mir-152 | DNAH9    | 0.41  |
| hsa-mir-152 | DOK6     | -0.4  |
| hsa-mir-152 | DYRK3    | 0.4   |
| hsa-mir-152 | ECM2     | 0.51  |
| hsa-mir-152 | EFEMP1   | 0.5   |
| hsa-mir-152 | EGF      | 0.5   |
| hsa-mir-152 | EPHX2    | 0.39  |
| hsa-mir-152 | ERBB3    | -0.48 |
| hsa-mir-152 | EVC      | 0.5   |
| hsa-mir-152 | FA2H     | -0.43 |
| hsa-mir-152 | FAM26B   | 0.43  |
| hsa-mir-152 | FAM77C   | -0.54 |
| hsa-mir-152 | FBXO32   | 0.45  |
| hsa-mir-152 | FER1L3   | 0.5   |
| hsa-mir-152 | FKBP9L   | 0.45  |
| hsa-mir-152 | FMO4     | 0.49  |
| hsa-mir-152 | FMOD     | 0.51  |
| hsa-mir-152 | GDF15    | 0.38  |
| hsa-mir-152 | GEM      | 0.48  |
| hsa-mir-152 | GNG4     | -0.52 |
| hsa-mir-152 | H2AFY2   | -0.44 |
| hsa-mir-152 | HEBP1    | 0.45  |
| hsa-mir-152 | IQCG     | 0.46  |
| hsa-mir-152 | ITGB4    | 0.39  |
| hsa-mir-152 | KCND1    | 0.32  |

|             |             |       |
|-------------|-------------|-------|
| hsa-mir-152 | KIAA0494    | 0.31  |
| hsa-mir-152 | KITLG       | 0.42  |
| hsa-mir-152 | KLHL23      | -0.49 |
| hsa-mir-152 | LAMA2       | 0.51  |
| hsa-mir-152 | LOX         | 0.33  |
| hsa-mir-152 | MT1H        | 0.45  |
| hsa-mir-152 | MTSS1       | -0.44 |
| hsa-mir-152 | MXRA8       | 0.42  |
| hsa-mir-152 | MYCBPAP     | 0.45  |
| hsa-mir-152 | NETO1       | -0.51 |
| hsa-mir-152 | NOL3        | 0.47  |
| hsa-mir-152 | OGFRL1      | 0.42  |
| hsa-mir-152 | OPLAH       | 0.37  |
| hsa-mir-152 | PAK7        | -0.42 |
| hsa-mir-152 | PAM         | 0.42  |
| hsa-mir-152 | PARP3       | 0.54  |
| hsa-mir-152 | PGCP        | 0.39  |
| hsa-mir-152 | PLA2G5      | 0.4   |
| hsa-mir-152 | PODXL2      | -0.41 |
| hsa-mir-152 | POSTN       | 0.29  |
| hsa-mir-152 | PPIC        | 0.53  |
| hsa-mir-152 | PTBP2       | -0.45 |
| hsa-mir-152 | PTRF        | 0.44  |
| hsa-mir-152 | RAB3C       | -0.4  |
| hsa-mir-152 | RALBP1      | 0.4   |
| hsa-mir-152 | RASSF8      | 0.51  |
| hsa-mir-152 | RFX2        | 0.45  |
| hsa-mir-152 | RP11-35N6.1 | -0.46 |
| hsa-mir-152 | SAMD9L      | 0.49  |
| hsa-mir-152 | SLC16A4     | 0.48  |
| hsa-mir-152 | SLC22A5     | 0.39  |
| hsa-mir-152 | SMAD5OS     | 0.39  |
| hsa-mir-152 | SMPD1       | 0.39  |
| hsa-mir-152 | SPAG1       | 0.38  |
| hsa-mir-152 | SPAG17      | 0.41  |
| hsa-mir-152 | SRPX2       | 0.42  |
| hsa-mir-152 | STMN1       | -0.53 |
| hsa-mir-152 | SUV39H2     | -0.33 |
| hsa-mir-152 | TEKT3       | 0.4   |
| hsa-mir-152 | TMEFF1      | -0.47 |
| hsa-mir-152 | TMEM121     | -0.46 |
| hsa-mir-152 | TMSL8       | -0.36 |
| hsa-mir-152 | TNFSF4      | 0.37  |
| hsa-mir-152 | TRIP6       | 0.51  |
| hsa-mir-152 | TWSG1       | 0.47  |
| hsa-mir-152 | UGT8        | -0.43 |
| hsa-mir-152 | VASN        | 0.3   |
| hsa-mir-152 | VCAM1       | 0.29  |
| hsa-mir-152 | VRK1        | -0.4  |
| hsa-mir-152 | WASF1       | -0.49 |
| hsa-mir-152 | WDR63       | 0.43  |
| hsa-mir-152 | WDR78       | 0.42  |
| hsa-mir-152 | XKR8        | 0.36  |

|              |          |       |
|--------------|----------|-------|
| hsa-mir-152  | XYLT2    | 0.47  |
| hsa-mir-152  | ZDHHC22  | -0.47 |
| hsa-mir-152  | ZNF239   | -0.32 |
| hsa-mir-154* | ADRA2C   | 0.45  |
| hsa-mir-154* | CDH9     | 0.46  |
| hsa-mir-154* | CYP26B1  | 0.53  |
| hsa-mir-154* | GDA      | 0.43  |
| hsa-mir-154* | GREM2    | 0.49  |
| hsa-mir-154* | HOOK1    | 0.45  |
| hsa-mir-154* | HRNBP3   | 0.54  |
| hsa-mir-154* | KLK7     | 0.49  |
| hsa-mir-154* | NGEF     | 0.5   |
| hsa-mir-154* | ODZ2     | 0.42  |
| hsa-mir-154* | PLAC2    | 0.45  |
| hsa-mir-154* | RYR2     | 0.49  |
| hsa-mir-154* | SHANK2   | 0.52  |
| hsa-mir-154* | SLC4A10  | 0.28  |
| hsa-mir-154* | SSTR1    | 0.46  |
| hsa-mir-154* | SYNGR3   | 0.46  |
| hsa-mir-154* | SYT3     | 0.34  |
| hsa-mir-155  | ABCC3    | 0.51  |
| hsa-mir-155  | ADM      | 0.43  |
| hsa-mir-155  | ANKRD46  | -0.55 |
| hsa-mir-155  | ANXA1    | 0.58  |
| hsa-mir-155  | ANXA5    | 0.45  |
| hsa-mir-155  | ARHGAP18 | 0.47  |
| hsa-mir-155  | ARPP-21  | -0.49 |
| hsa-mir-155  | ARSJ     | 0.55  |
| hsa-mir-155  | ATP6V1G2 | -0.52 |
| hsa-mir-155  | B3GNT5   | 0.49  |
| hsa-mir-155  | BCAP29   | 0.46  |
| hsa-mir-155  | BIC      | 0.74  |
| hsa-mir-155  | BRSK2    | -0.55 |
| hsa-mir-155  | C1RL     | 0.51  |
| hsa-mir-155  | C21orf63 | 0.43  |
| hsa-mir-155  | C6orf168 | -0.44 |
| hsa-mir-155  | C8orf4   | 0.41  |
| hsa-mir-155  | CA12     | 0.55  |
| hsa-mir-155  | CASP1    | 0.48  |
| hsa-mir-155  | CASP4    | 0.5   |
| hsa-mir-155  | CASP6    | 0.47  |
| hsa-mir-155  | CASP7    | 0.49  |
| hsa-mir-155  | CAST     | 0.56  |
| hsa-mir-155  | CBLN1    | -0.52 |
| hsa-mir-155  | CCDC109B | 0.6   |
| hsa-mir-155  | CCDC8    | 0.34  |
| hsa-mir-155  | CDKN1A   | 0.37  |
| hsa-mir-155  | CEBPD    | 0.47  |
| hsa-mir-155  | CHI3L1   | 0.49  |
| hsa-mir-155  | CLASP2   | -0.54 |
| hsa-mir-155  | CLCF1    | 0.51  |
| hsa-mir-155  | CLDN23   | 0.54  |
| hsa-mir-155  | CLEC5A   | 0.51  |

|             |           |       |
|-------------|-----------|-------|
| hsa-mir-155 | CLIC1     | 0.54  |
| hsa-mir-155 | COL8A1    | 0.46  |
| hsa-mir-155 | CSDA      | 0.5   |
| hsa-mir-155 | CSMD3     | -0.48 |
| hsa-mir-155 | DCBLD2    | 0.53  |
| hsa-mir-155 | DDB2      | 0.4   |
| hsa-mir-155 | DOK6      | -0.53 |
| hsa-mir-155 | DPY19L1   | 0.43  |
| hsa-mir-155 | DPYD      | 0.53  |
| hsa-mir-155 | DRAM      | 0.58  |
| hsa-mir-155 | DUSP26    | -0.53 |
| hsa-mir-155 | EFEMP2    | 0.53  |
| hsa-mir-155 | ELK3      | 0.5   |
| hsa-mir-155 | EMP1      | 0.49  |
| hsa-mir-155 | EMP3      | 0.52  |
| hsa-mir-155 | EPHA2     | 0.43  |
| hsa-mir-155 | ETV7      | 0.45  |
| hsa-mir-155 | F11R      | 0.43  |
| hsa-mir-155 | FAM126A   | 0.46  |
| hsa-mir-155 | FAM129A   | 0.55  |
| hsa-mir-155 | FAM77C    | -0.49 |
| hsa-mir-155 | FER1L3    | 0.57  |
| hsa-mir-155 | FGF13     | -0.47 |
| hsa-mir-155 | FGF9      | -0.52 |
| hsa-mir-155 | FLJ21963  | 0.53  |
| hsa-mir-155 | FNDC3B    | 0.57  |
| hsa-mir-155 | FOSL2     | 0.48  |
| hsa-mir-155 | FUCA2     | 0.48  |
| hsa-mir-155 | FUT9      | -0.5  |
| hsa-mir-155 | FZD1      | 0.4   |
| hsa-mir-155 | FZD7      | 0.47  |
| hsa-mir-155 | GALNT14   | -0.45 |
| hsa-mir-155 | GBP5      | 0.53  |
| hsa-mir-155 | GDAP1L1   | -0.5  |
| hsa-mir-155 | GSTA4     | -0.48 |
| hsa-mir-155 | HES5      | -0.43 |
| hsa-mir-155 | HRH1      | 0.43  |
| hsa-mir-155 | HSPA6     | 0.47  |
| hsa-mir-155 | HSPB1     | 0.39  |
| hsa-mir-155 | HUS1      | 0.5   |
| hsa-mir-155 | IQGAP1    | 0.58  |
| hsa-mir-155 | ISG20     | 0.48  |
| hsa-mir-155 | ITGA7     | 0.48  |
| hsa-mir-155 | KDEL2     | 0.52  |
| hsa-mir-155 | KIAA1244  | -0.48 |
| hsa-mir-155 | LEPREL1   | 0.36  |
| hsa-mir-155 | LGALS3    | 0.5   |
| hsa-mir-155 | LMNA      | 0.49  |
| hsa-mir-155 | LOC493869 | 0.56  |
| hsa-mir-155 | LOX       | 0.48  |
| hsa-mir-155 | LTBP1     | 0.41  |
| hsa-mir-155 | LTF       | 0.27  |
| hsa-mir-155 | MDFIC     | 0.47  |



|             |             |       |
|-------------|-------------|-------|
| hsa-mir-155 | MEOX2       | 0.34  |
| hsa-mir-155 | METTL7B     | 0.45  |
| hsa-mir-155 | MICALL2     | 0.4   |
| hsa-mir-155 | MMP7        | 0.41  |
| hsa-mir-155 | MRCL3       | 0.52  |
| hsa-mir-155 | MSN         | 0.53  |
| hsa-mir-155 | MST150      | 0.58  |
| hsa-mir-155 | MYBPH       | 0.38  |
| hsa-mir-155 | MYO1E       | 0.49  |
| hsa-mir-155 | NETO1       | -0.51 |
| hsa-mir-155 | NNMT        | 0.49  |
| hsa-mir-155 | NTN4        | -0.42 |
| hsa-mir-155 | NUDT11      | -0.43 |
| hsa-mir-155 | OPCML       | -0.44 |
| hsa-mir-155 | OSBPL3      | 0.51  |
| hsa-mir-155 | PBEF1       | 0.48  |
| hsa-mir-155 | PDE2A       | -0.54 |
| hsa-mir-155 | PDPN        | 0.53  |
| hsa-mir-155 | PFN2        | -0.44 |
| hsa-mir-155 | PHYHIPL     | -0.51 |
| hsa-mir-155 | PLA2G2A     | 0.27  |
| hsa-mir-155 | PLAU        | 0.57  |
| hsa-mir-155 | PLAUR       | 0.52  |
| hsa-mir-155 | PLCB1       | -0.47 |
| hsa-mir-155 | PLP2        | 0.54  |
| hsa-mir-155 | PLSCR1      | 0.45  |
| hsa-mir-155 | POSTN       | 0.45  |
| hsa-mir-155 | PPIC        | 0.52  |
| hsa-mir-155 | PPP1R3B     | 0.54  |
| hsa-mir-155 | PQLC3       | 0.46  |
| hsa-mir-155 | PROS1       | 0.51  |
| hsa-mir-155 | PTRF        | 0.52  |
| hsa-mir-155 | PTX3        | 0.51  |
| hsa-mir-155 | PYGL        | 0.51  |
| hsa-mir-155 | RAB33A      | -0.52 |
| hsa-mir-155 | RAB3C       | -0.38 |
| hsa-mir-155 | RBMS1       | 0.48  |
| hsa-mir-155 | RDH10       | 0.46  |
| hsa-mir-155 | ROR1        | 0.36  |
| hsa-mir-155 | RP11-35N6.1 | -0.45 |
| hsa-mir-155 | RUNX1       | 0.54  |
| hsa-mir-155 | S100A4      | 0.48  |
| hsa-mir-155 | SAA1        | 0.38  |
| hsa-mir-155 | SAA2        | 0.31  |
| hsa-mir-155 | SATB1       | -0.48 |
| hsa-mir-155 | SEC61G      | 0.24  |
| hsa-mir-155 | SFRP4       | 0.4   |
| hsa-mir-155 | SH3GL2      | -0.5  |
| hsa-mir-155 | SH3GLB1     | 0.53  |
| hsa-mir-155 | SHROOM3     | 0.38  |
| hsa-mir-155 | SLC25A33    | -0.34 |
| hsa-mir-155 | SLC25A41    | -0.47 |
| hsa-mir-155 | SLC27A3     | 0.46  |

|             |           |       |
|-------------|-----------|-------|
| hsa-mir-155 | SLC35D1   | 0.56  |
| hsa-mir-155 | SLC35F2   | 0.39  |
| hsa-mir-155 | SNAP91    | -0.51 |
| hsa-mir-155 | SOCS3     | 0.5   |
| hsa-mir-155 | SOD2      | 0.45  |
| hsa-mir-155 | SPOCD1    | 0.5   |
| hsa-mir-155 | SRPX2     | 0.55  |
| hsa-mir-155 | STAC      | 0.38  |
| hsa-mir-155 | STEAP3    | 0.57  |
| hsa-mir-155 | STK17A    | 0.47  |
| hsa-mir-155 | STS-1     | 0.39  |
| hsa-mir-155 | SWAP70    | 0.41  |
| hsa-mir-155 | TIMP1     | 0.57  |
| hsa-mir-155 | TMEM154   | 0.5   |
| hsa-mir-155 | TMEM158   | 0.4   |
| hsa-mir-155 | TMEM71    | 0.41  |
| hsa-mir-155 | TNC       | 0.48  |
| hsa-mir-155 | TNFRSF10B | 0.48  |
| hsa-mir-155 | TNFRSF12A | 0.56  |
| hsa-mir-155 | TNFRSF14  | 0.42  |
| hsa-mir-155 | TNFRSF1A  | 0.53  |
| hsa-mir-155 | TREM1     | 0.49  |
| hsa-mir-155 | TRIP6     | 0.48  |
| hsa-mir-155 | UGCG      | 0.34  |
| hsa-mir-155 | UPP1      | 0.49  |
| hsa-mir-155 | USP43     | -0.48 |
| hsa-mir-155 | VIM       | 0.52  |
| hsa-mir-155 | WASF1     | -0.51 |
| hsa-mir-155 | WWTR1     | 0.59  |
| hsa-mir-155 | ZNF217    | 0.54  |
| hsa-mir-155 | ZNF239    | -0.2  |
| hsa-mir-15a | March11   | -0.4  |
| hsa-mir-15a | ATP8A2    | -0.43 |
| hsa-mir-15a | C10orf35  | -0.32 |
| hsa-mir-15a | C13orf1   | 0     |
| hsa-mir-15a | C14orf49  | 0.29  |
| hsa-mir-15a | CDH9      | -0.45 |
| hsa-mir-15a | CLEC4G    | -0.46 |
| hsa-mir-15a | DRD5      | -0.4  |
| hsa-mir-15a | FA2H      | -0.34 |
| hsa-mir-15a | GABRB3    | -0.34 |
| hsa-mir-15a | GDA       | -0.42 |
| hsa-mir-15a | GLT1D1    | -0.4  |
| hsa-mir-15a | HOOK1     | -0.37 |
| hsa-mir-15a | HTR2C     | -0.42 |
| hsa-mir-15a | KCNG3     | -0.38 |
| hsa-mir-15a | KIAA1622  | -0.42 |
| hsa-mir-15a | MMD       | -0.48 |
| hsa-mir-15a | OCA2      | -0.43 |
| hsa-mir-15a | PTPRR     | -0.38 |
| hsa-mir-15a | SPINT2    | -0.44 |
| hsa-mir-15a | SSTR1     | -0.38 |
| hsa-mir-15a | TPO       | -0.41 |

|             |           |       |
|-------------|-----------|-------|
| hsa-mir-15a | UNC13C    | -0.37 |
| hsa-mir-15b | Sept4     | -0.44 |
| hsa-mir-15b | ABR       | -0.44 |
| hsa-mir-15b | ADARB2    | -0.47 |
| hsa-mir-15b | AIFM3     | -0.48 |
| hsa-mir-15b | AKR1C1    | -0.46 |
| hsa-mir-15b | ALDH2     | -0.51 |
| hsa-mir-15b | ARHGAP11A | 0.5   |
| hsa-mir-15b | ASPM      | 0.57  |
| hsa-mir-15b | ATF7IP2   | -0.49 |
| hsa-mir-15b | ATP6V0A2  | 0.46  |
| hsa-mir-15b | BIRC5     | 0.51  |
| hsa-mir-15b | BTG3      | 0.44  |
| hsa-mir-15b | BUB1      | 0.63  |
| hsa-mir-15b | BUB1B     | 0.52  |
| hsa-mir-15b | C11orf82  | 0.55  |
| hsa-mir-15b | C12orf48  | 0.49  |
| hsa-mir-15b | C13orf3   | 0.54  |
| hsa-mir-15b | C16orf75  | 0.44  |
| hsa-mir-15b | C2orf37   | 0.43  |
| hsa-mir-15b | C6orf167  | 0.5   |
| hsa-mir-15b | CASC5     | 0.53  |
| hsa-mir-15b | CBX7      | -0.61 |
| hsa-mir-15b | CCDC18    | 0.49  |
| hsa-mir-15b | CCK       | -0.38 |
| hsa-mir-15b | CCNA2     | 0.55  |
| hsa-mir-15b | CCNB1     | 0.58  |
| hsa-mir-15b | CCNB2     | 0.59  |
| hsa-mir-15b | CCT6A     | 0.25  |
| hsa-mir-15b | CDC2      | 0.56  |
| hsa-mir-15b | CDC20     | 0.52  |
| hsa-mir-15b | CDC25C    | 0.52  |
| hsa-mir-15b | CDC45L    | 0.52  |
| hsa-mir-15b | CDC6      | 0.52  |
| hsa-mir-15b | CDCA2     | 0.53  |
| hsa-mir-15b | CDCA4     | 0.48  |
| hsa-mir-15b | CDCA8     | 0.56  |
| hsa-mir-15b | CDKN3     | 0.51  |
| hsa-mir-15b | CENPA     | 0.6   |
| hsa-mir-15b | CENPE     | 0.54  |
| hsa-mir-15b | CENPF     | 0.57  |
| hsa-mir-15b | CENPH     | 0.51  |
| hsa-mir-15b | CENPK     | 0.57  |
| hsa-mir-15b | CENPN     | 0.45  |
| hsa-mir-15b | CEP55     | 0.59  |
| hsa-mir-15b | CHEK1     | 0.59  |
| hsa-mir-15b | CKAP2L    | 0.59  |
| hsa-mir-15b | CKS2      | 0.49  |
| hsa-mir-15b | CRLF1     | -0.37 |
| hsa-mir-15b | CTDSPL2   | 0.39  |
| hsa-mir-15b | DBF4      | 0.52  |
| hsa-mir-15b | DDX39     | 0.53  |
| hsa-mir-15b | DEPDC1    | 0.51  |

|             |             |       |
|-------------|-------------|-------|
| hsa-mir-15b | DEPDC1B     | 0.54  |
| hsa-mir-15b | DHFR        | 0.49  |
| hsa-mir-15b | DHRS9       | -0.42 |
| hsa-mir-15b | KFZp762E131 | 0.6   |
| hsa-mir-15b | DLG7        | 0.59  |
| hsa-mir-15b | DNAJC12     | -0.43 |
| hsa-mir-15b | DTL         | 0.54  |
| hsa-mir-15b | E2F7        | 0.58  |
| hsa-mir-15b | E2F8        | 0.59  |
| hsa-mir-15b | ECT2        | 0.57  |
| hsa-mir-15b | EPB49       | -0.49 |
| hsa-mir-15b | ESCO2       | 0.57  |
| hsa-mir-15b | EXO1        | 0.5   |
| hsa-mir-15b | FAM54A      | 0.54  |
| hsa-mir-15b | FAM64A      | 0.58  |
| hsa-mir-15b | FAM83D      | 0.48  |
| hsa-mir-15b | FANCI       | 0.54  |
| hsa-mir-15b | FBXL15      | -0.52 |
| hsa-mir-15b | FBXO2       | -0.47 |
| hsa-mir-15b | FBXO5       | 0.55  |
| hsa-mir-15b | GABRG1      | -0.47 |
| hsa-mir-15b | GALNAC4S-6S | -0.41 |
| hsa-mir-15b | GAS2L3      | 0.44  |
| hsa-mir-15b | GDA         | -0.47 |
| hsa-mir-15b | GGH         | 0.44  |
| hsa-mir-15b | GINS1       | 0.47  |
| hsa-mir-15b | GINS2       | 0.52  |
| hsa-mir-15b | GPX7        | 0.45  |
| hsa-mir-15b | GTF2IRD2    | 0.36  |
| hsa-mir-15b | HHATL       | -0.43 |
| hsa-mir-15b | HIST1H4J    | 0.18  |
| hsa-mir-15b | HMGB2       | 0.54  |
| hsa-mir-15b | HMMR        | 0.5   |
| hsa-mir-15b | HS3ST4      | -0.55 |
| hsa-mir-15b | IGF2BP3     | 0.34  |
| hsa-mir-15b | JAKMIP1     | -0.35 |
| hsa-mir-15b | KCNK1       | -0.41 |
| hsa-mir-15b | KHDRBS2     | -0.41 |
| hsa-mir-15b | KIAA0101    | 0.49  |
| hsa-mir-15b | KIF14       | 0.54  |
| hsa-mir-15b | KIF15       | 0.58  |
| hsa-mir-15b | KIF18A      | 0.61  |
| hsa-mir-15b | KIF1C       | -0.31 |
| hsa-mir-15b | KIF20A      | 0.56  |
| hsa-mir-15b | KIF23       | 0.59  |
| hsa-mir-15b | KIF2C       | 0.55  |
| hsa-mir-15b | KIF4A       | 0.56  |
| hsa-mir-15b | KIFC1       | 0.54  |
| hsa-mir-15b | KNTC1       | 0.52  |
| hsa-mir-15b | KPNA2       | 0.5   |
| hsa-mir-15b | MAD2L1      | 0.5   |
| hsa-mir-15b | MAP7        | -0.47 |
| hsa-mir-15b | MELK        | 0.6   |

|             |          |       |
|-------------|----------|-------|
| hsa-mir-15b | MKI67    | 0.49  |
| hsa-mir-15b | MKX      | -0.42 |
| hsa-mir-15b | MLF1IP   | 0.58  |
| hsa-mir-15b | MND1     | 0.52  |
| hsa-mir-15b | MTBP     | 0.41  |
| hsa-mir-15b | MYLIP    | -0.35 |
| hsa-mir-15b | NDC80    | 0.65  |
| hsa-mir-15b | NEIL3    | 0.56  |
| hsa-mir-15b | NEK2     | 0.52  |
| hsa-mir-15b | NOX4     | 0.43  |
| hsa-mir-15b | NUF2     | 0.59  |
| hsa-mir-15b | NUSAP1   | 0.57  |
| hsa-mir-15b | OIP5     | 0.54  |
| hsa-mir-15b | PAIP2B   | -0.45 |
| hsa-mir-15b | PBK      | 0.6   |
| hsa-mir-15b | PCNA     | 0.51  |
| hsa-mir-15b | PELI3    | -0.51 |
| hsa-mir-15b | PPIL5    | 0.47  |
| hsa-mir-15b | PRC1     | 0.52  |
| hsa-mir-15b | PTTG1    | 0.59  |
| hsa-mir-15b | PTTG2    | 0.57  |
| hsa-mir-15b | PTTG3    | 0.57  |
| hsa-mir-15b | RACGAP1  | 0.51  |
| hsa-mir-15b | RAD18    | 0.48  |
| hsa-mir-15b | RAD51    | 0.54  |
| hsa-mir-15b | RAD51AP1 | 0.5   |
| hsa-mir-15b | RBM11    | -0.49 |
| hsa-mir-15b | RFC4     | 0.56  |
| hsa-mir-15b | RFPL2    | -0.43 |
| hsa-mir-15b | RICH2    | -0.48 |
| hsa-mir-15b | RNASEH2A | 0.48  |
| hsa-mir-15b | RRM1     | 0.48  |
| hsa-mir-15b | RRM2     | 0.58  |
| hsa-mir-15b | SGMS1    | -0.38 |
| hsa-mir-15b | SGOL2    | 0.58  |
| hsa-mir-15b | SH3GL2   | -0.33 |
| hsa-mir-15b | SH3GL3   | -0.41 |
| hsa-mir-15b | SHCBP1   | 0.6   |
| hsa-mir-15b | SLC2A4   | -0.41 |
| hsa-mir-15b | SLITRK4  | -0.38 |
| hsa-mir-15b | SMC2     | 0.51  |
| hsa-mir-15b | SMC4     | 0.67  |
| hsa-mir-15b | SNCG     | -0.56 |
| hsa-mir-15b | SPC25    | 0.57  |
| hsa-mir-15b | SPINT2   | -0.51 |
| hsa-mir-15b | SSTR1    | -0.44 |
| hsa-mir-15b | STIL     | 0.55  |
| hsa-mir-15b | TMCC2    | -0.46 |
| hsa-mir-15b | TMEM10   | -0.5  |
| hsa-mir-15b | TMEM125  | -0.42 |
| hsa-mir-15b | TMEM48   | 0.52  |
| hsa-mir-15b | TNFRSF19 | 0.35  |
| hsa-mir-15b | TOP2A    | 0.57  |

|               |           |       |
|---------------|-----------|-------|
| hsa-mir-15b   | TPX2      | 0.54  |
| hsa-mir-15b   | TSPYL5    | -0.37 |
| hsa-mir-15b   | TTK       | 0.58  |
| hsa-mir-15b   | TYMS      | 0.6   |
| hsa-mir-15b   | UBE2C     | 0.56  |
| hsa-mir-15b   | UBTD2     | 0.47  |
| hsa-mir-15b   | USP1      | 0.41  |
| hsa-mir-15b   | WDHD1     | 0.54  |
| hsa-mir-15b   | WFS1      | -0.43 |
| hsa-mir-15b   | WIF1      | -0.47 |
| hsa-mir-16    | ADCYAP1   | -0.23 |
| hsa-mir-16    | CDH12     | -0.45 |
| hsa-mir-16    | FAM79A    | -0.51 |
| hsa-mir-16    | GABRB3    | -0.35 |
| hsa-mir-16    | HMGCLL1   | -0.41 |
| hsa-mir-16    | HOOK1     | -0.42 |
| hsa-mir-16    | HTR1E     | -0.48 |
| hsa-mir-16    | KCNG3     | -0.4  |
| hsa-mir-16    | MAL2      | -0.4  |
| hsa-mir-16    | MATK      | -0.56 |
| hsa-mir-16    | OCA2      | -0.47 |
| hsa-mir-16    | PRSS1     | -0.47 |
| hsa-mir-16    | PRSS2     | -0.49 |
| hsa-mir-16    | QSER1     | 0.42  |
| hsa-mir-16    | RBM11     | -0.49 |
| hsa-mir-16    | RNF43     | -0.5  |
| hsa-mir-16    | SMCHD1    | 0.39  |
| hsa-mir-16    | SNCG      | -0.54 |
| hsa-mir-16    | TMEM125   | -0.38 |
| hsa-mir-16    | UBTD1     | -0.15 |
| hsa-mir-17-3p | AADAACL1  | -0.5  |
| hsa-mir-17-3p | AIFM2     | -0.34 |
| hsa-mir-17-3p | ALDH1A1   | -0.36 |
| hsa-mir-17-3p | C21orf25  | -0.33 |
| hsa-mir-17-3p | C5orf32   | -0.46 |
| hsa-mir-17-3p | CGNL1     | -0.38 |
| hsa-mir-17-3p | CHPT1     | -0.36 |
| hsa-mir-17-3p | CTSH      | -0.37 |
| hsa-mir-17-3p | CXCL14    | -0.49 |
| hsa-mir-17-3p | DZIP1     | 0.3   |
| hsa-mir-17-3p | EFS       | 0.22  |
| hsa-mir-17-3p | GJA1      | -0.39 |
| hsa-mir-17-3p | GNG4      | 0.42  |
| hsa-mir-17-3p | HDAC2     | 0.38  |
| hsa-mir-17-3p | HFM1      | 0.35  |
| hsa-mir-17-3p | IMPA2     | -0.28 |
| hsa-mir-17-3p | KIF15     | 0.45  |
| hsa-mir-17-3p | KLHL23    | 0.4   |
| hsa-mir-17-3p | LOC388335 | -0.33 |
| hsa-mir-17-3p | MEX3A     | 0.5   |
| hsa-mir-17-3p | MT1E      | -0.43 |
| hsa-mir-17-3p | MT1M      | -0.44 |
| hsa-mir-17-3p | NEUROD4   | 0.36  |

|               |          |       |
|---------------|----------|-------|
| hsa-mir-17-3p | POU4F1   | 0.35  |
| hsa-mir-17-3p | PSMB10   | -0.41 |
| hsa-mir-17-3p | RASSF8   | -0.27 |
| hsa-mir-17-3p | SERPINF1 | -0.41 |
| hsa-mir-17-3p | SOX11    | 0.42  |
| hsa-mir-17-3p | TACC1    | -0.38 |
| hsa-mir-17-3p | TMSL8    | 0.32  |
| hsa-mir-17-3p | TOP2A    | 0.45  |
| hsa-mir-17-3p | TRMT5    | 0.42  |
| hsa-mir-17-3p | ZFP37    | 0.4   |
| hsa-mir-17-5p | AADACL1  | -0.58 |
| hsa-mir-17-5p | AIFM2    | -0.4  |
| hsa-mir-17-5p | ALDH1A1  | -0.35 |
| hsa-mir-17-5p | AMPD3    | -0.43 |
| hsa-mir-17-5p | ARID2    | 0.41  |
| hsa-mir-17-5p | ARRDC2   | -0.42 |
| hsa-mir-17-5p | ASPM     | 0.56  |
| hsa-mir-17-5p | ATAD5    | 0.59  |
| hsa-mir-17-5p | AURKB    | 0.44  |
| hsa-mir-17-5p | BCAR3    | -0.34 |
| hsa-mir-17-5p | BHLHB2   | -0.42 |
| hsa-mir-17-5p | BHLHB3   | -0.43 |
| hsa-mir-17-5p | BIRC3    | -0.4  |
| hsa-mir-17-5p | BUB1     | 0.48  |
| hsa-mir-17-5p | BUB1B    | 0.54  |
| hsa-mir-17-5p | C11orf82 | 0.54  |
| hsa-mir-17-5p | C13orf3  | 0.59  |
| hsa-mir-17-5p | C15orf42 | 0.55  |
| hsa-mir-17-5p | C16orf59 | 0.5   |
| hsa-mir-17-5p | C18orf54 | 0.59  |
| hsa-mir-17-5p | C19orf57 | 0.49  |
| hsa-mir-17-5p | C1orf106 | 0.53  |
| hsa-mir-17-5p | C4orf18  | -0.37 |
| hsa-mir-17-5p | C5orf32  | -0.51 |
| hsa-mir-17-5p | C6orf129 | 0.45  |
| hsa-mir-17-5p | C6orf167 | 0.51  |
| hsa-mir-17-5p | C6orf173 | 0.36  |
| hsa-mir-17-5p | CASC5    | 0.5   |
| hsa-mir-17-5p | CCDC5    | 0.46  |
| hsa-mir-17-5p | CCNA2    | 0.49  |
| hsa-mir-17-5p | CCNB1IP1 | 0.35  |
| hsa-mir-17-5p | CCNB2    | 0.54  |
| hsa-mir-17-5p | CDC2     | 0.49  |
| hsa-mir-17-5p | CDC20    | 0.45  |
| hsa-mir-17-5p | CDC25C   | 0.53  |
| hsa-mir-17-5p | CDC45L   | 0.55  |
| hsa-mir-17-5p | CDC6     | 0.5   |
| hsa-mir-17-5p | CDC7     | 0.45  |
| hsa-mir-17-5p | CDCA5    | 0.5   |
| hsa-mir-17-5p | CDCA7    | 0.5   |
| hsa-mir-17-5p | CDCA8    | 0.51  |
| hsa-mir-17-5p | CDT1     | 0.46  |
| hsa-mir-17-5p | CENPE    | 0.49  |

|               |             |       |
|---------------|-------------|-------|
| hsa-mir-17-5p | CENPF       | 0.54  |
| hsa-mir-17-5p | CENPH       | 0.54  |
| hsa-mir-17-5p | CENPJ       | 0.51  |
| hsa-mir-17-5p | CENPK       | 0.46  |
| hsa-mir-17-5p | CENPM       | 0.47  |
| hsa-mir-17-5p | CHAF1A      | 0.43  |
| hsa-mir-17-5p | CHD7        | 0.5   |
| hsa-mir-17-5p | CHPT1       | -0.39 |
| hsa-mir-17-5p | CHTF18      | 0.44  |
| hsa-mir-17-5p | CKAP2       | 0.53  |
| hsa-mir-17-5p | CKAP2L      | 0.49  |
| hsa-mir-17-5p | CLGN        | 0.23  |
| hsa-mir-17-5p | COL8A2      | -0.39 |
| hsa-mir-17-5p | CREBL2      | -0.48 |
| hsa-mir-17-5p | CSRP1       | -0.5  |
| hsa-mir-17-5p | CXCL14      | -0.51 |
| hsa-mir-17-5p | CYB561      | -0.49 |
| hsa-mir-17-5p | CYB5R2      | -0.41 |
| hsa-mir-17-5p | DCC1        | 0.49  |
| hsa-mir-17-5p | DEPDC1B     | 0.58  |
| hsa-mir-17-5p | KFZp762E131 | 0.51  |
| hsa-mir-17-5p | DLG7        | 0.51  |
| hsa-mir-17-5p | DNA2L       | 0.49  |
| hsa-mir-17-5p | DNMT3B      | 0.43  |
| hsa-mir-17-5p | DOK6        | 0.08  |
| hsa-mir-17-5p | DTL         | 0.57  |
| hsa-mir-17-5p | E2F1        | 0.39  |
| hsa-mir-17-5p | E2F2        | 0.52  |
| hsa-mir-17-5p | ENDOD1      | -0.46 |
| hsa-mir-17-5p | EPDR1       | -0.36 |
| hsa-mir-17-5p | ESCO2       | 0.54  |
| hsa-mir-17-5p | ETV1        | 0.42  |
| hsa-mir-17-5p | EVI2B       | -0.35 |
| hsa-mir-17-5p | EXO1        | 0.55  |
| hsa-mir-17-5p | FAM108C1    | -0.21 |
| hsa-mir-17-5p | FAM54A      | 0.48  |
| hsa-mir-17-5p | FAM60A      | 0.52  |
| hsa-mir-17-5p | FAM64A      | 0.55  |
| hsa-mir-17-5p | FAM79A      | -0.49 |
| hsa-mir-17-5p | FAM83D      | 0.45  |
| hsa-mir-17-5p | FANCA       | 0.49  |
| hsa-mir-17-5p | FANCC       | 0.55  |
| hsa-mir-17-5p | FANCD2      | 0.54  |
| hsa-mir-17-5p | FANCG       | 0.49  |
| hsa-mir-17-5p | FANCI       | 0.54  |
| hsa-mir-17-5p | FBXO5       | 0.53  |
| hsa-mir-17-5p | FEN1        | 0.37  |
| hsa-mir-17-5p | FLJ39660    | 0.41  |
| hsa-mir-17-5p | FOXM1       | 0.47  |
| hsa-mir-17-5p | FTHL17      | -0.39 |
| hsa-mir-17-5p | GINS2       | 0.5   |
| hsa-mir-17-5p | GINS3       | 0.49  |
| hsa-mir-17-5p | GJA1        | -0.31 |



|               |          |       |
|---------------|----------|-------|
| hsa-mir-17-5p | GLCCI1   | 0.44  |
| hsa-mir-17-5p | GNG4     | 0.5   |
| hsa-mir-17-5p | GPR37    | -0.35 |
| hsa-mir-17-5p | GSG2     | 0.46  |
| hsa-mir-17-5p | GTSE1    | 0.49  |
| hsa-mir-17-5p | H3F3A    | 0.54  |
| hsa-mir-17-5p | HELLS    | 0.47  |
| hsa-mir-17-5p | HEPH     | -0.37 |
| hsa-mir-17-5p | HIST1H3J | 0.53  |
| hsa-mir-17-5p | HLA-A    | -0.18 |
| hsa-mir-17-5p | HLA-E    | -0.22 |
| hsa-mir-17-5p | HMGB3    | 0.48  |
| hsa-mir-17-5p | HOXD3    | 0.46  |
| hsa-mir-17-5p | HRASLS3  | -0.53 |
| hsa-mir-17-5p | HSD11B1  | -0.48 |
| hsa-mir-17-5p | IGSF9    | 0.34  |
| hsa-mir-17-5p | KIAA1199 | -0.39 |
| hsa-mir-17-5p | KIF11    | 0.48  |
| hsa-mir-17-5p | KIF14    | 0.52  |
| hsa-mir-17-5p | KIF15    | 0.59  |
| hsa-mir-17-5p | KIF18A   | 0.47  |
| hsa-mir-17-5p | KIF23    | 0.49  |
| hsa-mir-17-5p | KIF2C    | 0.55  |
| hsa-mir-17-5p | KIF4A    | 0.5   |
| hsa-mir-17-5p | KIFC1    | 0.55  |
| hsa-mir-17-5p | LGALS9   | -0.22 |
| hsa-mir-17-5p | LGI1     | -0.36 |
| hsa-mir-17-5p | LIG1     | 0.39  |
| hsa-mir-17-5p | LIN9     | 0.47  |
| hsa-mir-17-5p | LMNB1    | 0.45  |
| hsa-mir-17-5p | MAD2L1   | 0.51  |
| hsa-mir-17-5p | MCM10    | 0.53  |
| hsa-mir-17-5p | MCM8     | 0.49  |
| hsa-mir-17-5p | MELK     | 0.48  |
| hsa-mir-17-5p | MEX3A    | 0.63  |
| hsa-mir-17-5p | MEX3B    | 0.46  |
| hsa-mir-17-5p | MGC7036  | -0.52 |
| hsa-mir-17-5p | MKI67    | 0.47  |
| hsa-mir-17-5p | MKRN3    | 0.5   |
| hsa-mir-17-5p | MLF1IP   | 0.53  |
| hsa-mir-17-5p | MRAS     | -0.44 |
| hsa-mir-17-5p | MT1B     | -0.38 |
| hsa-mir-17-5p | MT1E     | -0.5  |
| hsa-mir-17-5p | MT1G     | -0.45 |
| hsa-mir-17-5p | MT1H     | -0.39 |
| hsa-mir-17-5p | MT1JP    | -0.48 |
| hsa-mir-17-5p | MT1M     | -0.48 |
| hsa-mir-17-5p | MT1X     | -0.37 |
| hsa-mir-17-5p | MT2A     | -0.42 |
| hsa-mir-17-5p | MXD3     | 0.51  |
| hsa-mir-17-5p | MYB      | 0.44  |
| hsa-mir-17-5p | MYBL2    | 0.51  |
| hsa-mir-17-5p | MYCN     | 0.48  |

|               |              |       |
|---------------|--------------|-------|
| hsa-mir-17-5p | NCAPH        | 0.49  |
| hsa-mir-17-5p | NDC80        | 0.53  |
| hsa-mir-17-5p | NEIL3        | 0.52  |
| hsa-mir-17-5p | NEK2         | 0.48  |
| hsa-mir-17-5p | NEUROD4      | 0.34  |
| hsa-mir-17-5p | NUF2         | 0.55  |
| hsa-mir-17-5p | NUSAP1       | 0.54  |
| hsa-mir-17-5p | NY-SAR-48    | 0.52  |
| hsa-mir-17-5p | ODC1         | 0.5   |
| hsa-mir-17-5p | OIP5         | 0.46  |
| hsa-mir-17-5p | OPLAH        | -0.4  |
| hsa-mir-17-5p | ORC1L        | 0.5   |
| hsa-mir-17-5p | ORC6L        | 0.47  |
| hsa-mir-17-5p | P2RY2        | -0.48 |
| hsa-mir-17-5p | PAFAH1B3     | 0.47  |
| hsa-mir-17-5p | PBK          | 0.49  |
| hsa-mir-17-5p | PLEKHK1      | 0.54  |
| hsa-mir-17-5p | PLK4         | 0.52  |
| hsa-mir-17-5p | PMP22        | -0.38 |
| hsa-mir-17-5p | PNPLA4       | -0.37 |
| hsa-mir-17-5p | POLG         | 0.57  |
| hsa-mir-17-5p | POLQ         | 0.48  |
| hsa-mir-17-5p | PPCS         | -0.49 |
| hsa-mir-17-5p | PRC1         | 0.5   |
| hsa-mir-17-5p | PRIM1        | 0.45  |
| hsa-mir-17-5p | PTTG2        | 0.46  |
| hsa-mir-17-5p | RAB11FIP5    | -0.49 |
| hsa-mir-17-5p | RACGAP1      | 0.51  |
| hsa-mir-17-5p | RAD51        | 0.52  |
| hsa-mir-17-5p | RAD51AP1     | 0.51  |
| hsa-mir-17-5p | RAD54L       | 0.53  |
| hsa-mir-17-5p | REEP5        | -0.49 |
| hsa-mir-17-5p | RFC3         | 0.56  |
| hsa-mir-17-5p | RFC4         | 0.48  |
| hsa-mir-17-5p | RFC5         | 0.46  |
| hsa-mir-17-5p | RHBDD2       | -0.37 |
| hsa-mir-17-5p | RILP         | -0.5  |
| hsa-mir-17-5p | RNASEH2A     | 0.52  |
| hsa-mir-17-5p | RP11-78J21.1 | 0.44  |
| hsa-mir-17-5p | RRM2         | 0.48  |
| hsa-mir-17-5p | SALL3        | 0.36  |
| hsa-mir-17-5p | SGOL2        | 0.5   |
| hsa-mir-17-5p | SHD          | 0.45  |
| hsa-mir-17-5p | SLC1A3       | -0.31 |
| hsa-mir-17-5p | SLC25A18     | -0.34 |
| hsa-mir-17-5p | SLC7A8       | -0.5  |
| hsa-mir-17-5p | SOX11        | 0.5   |
| hsa-mir-17-5p | SOX4         | 0.57  |
| hsa-mir-17-5p | SPAG5        | 0.52  |
| hsa-mir-17-5p | SPC25        | 0.47  |
| hsa-mir-17-5p | SPOCK2       | -0.45 |
| hsa-mir-17-5p | SYTL2        | -0.46 |
| hsa-mir-17-5p | TACC1        | -0.46 |

|               |           |       |
|---------------|-----------|-------|
| hsa-mir-17-5p | TIMELESS  | 0.51  |
| hsa-mir-17-5p | TMPO      | 0.52  |
| hsa-mir-17-5p | TMSL8     | 0.43  |
| hsa-mir-17-5p | TNFSF12   | -0.52 |
| hsa-mir-17-5p | TOP2A     | 0.57  |
| hsa-mir-17-5p | TPX2      | 0.54  |
| hsa-mir-17-5p | TRAIP     | 0.54  |
| hsa-mir-17-5p | TRIP13    | 0.43  |
| hsa-mir-17-5p | TRMT5     | 0.48  |
| hsa-mir-17-5p | TROAP     | 0.48  |
| hsa-mir-17-5p | TRPM2     | -0.44 |
| hsa-mir-17-5p | TTK       | 0.53  |
| hsa-mir-17-5p | UBE2C     | 0.55  |
| hsa-mir-17-5p | UBE2T     | 0.43  |
| hsa-mir-17-5p | UHRF1     | 0.51  |
| hsa-mir-17-5p | WDR51A    | 0.41  |
| hsa-mir-17-5p | XKR8      | -0.23 |
| hsa-mir-17-5p | XRCC2     | 0.49  |
| hsa-mir-17-5p | ZNF239    | 0.31  |
| hsa-mir-17-5p | ZNF300    | 0.6   |
| hsa-mir-17-5p | ZWINT     | 0.53  |
| hsa-mir-181a  | ADAM12    | -0.42 |
| hsa-mir-181a  | ASCL1     | 0.44  |
| hsa-mir-181a  | BAI3      | 0.39  |
| hsa-mir-181a  | BCAN      | 0.45  |
| hsa-mir-181a  | C10orf125 | -0.21 |
| hsa-mir-181a  | C1orf106  | 0.46  |
| hsa-mir-181a  | C20orf58  | 0.4   |
| hsa-mir-181a  | C22orf36  | 0.29  |
| hsa-mir-181a  | CADM2     | 0.4   |
| hsa-mir-181a  | CAMSAP1L1 | 0.53  |
| hsa-mir-181a  | CCL2      | -0.37 |
| hsa-mir-181a  | CCR2      | -0.42 |
| hsa-mir-181a  | CD40      | -0.35 |
| hsa-mir-181a  | CFB       | -0.47 |
| hsa-mir-181a  | CNN1      | -0.38 |
| hsa-mir-181a  | CRB1      | 0.42  |
| hsa-mir-181a  | CSPG5     | 0.45  |
| hsa-mir-181a  | CST6      | -0.41 |
| hsa-mir-181a  | CTSZ      | -0.41 |
| hsa-mir-181a  | CTTNBP2   | 0.43  |
| hsa-mir-181a  | CXXC4     | 0.41  |
| hsa-mir-181a  | DGKB      | 0.41  |
| hsa-mir-181a  | DLL1      | 0.48  |
| hsa-mir-181a  | DLL3      | 0.51  |
| hsa-mir-181a  | DPYSL4    | 0.42  |
| hsa-mir-181a  | DSCAM     | 0.45  |
| hsa-mir-181a  | DSCAML1   | 0.42  |
| hsa-mir-181a  | ENAH      | 0.41  |
| hsa-mir-181a  | F13A1     | -0.4  |
| hsa-mir-181a  | FAM110B   | 0.5   |
| hsa-mir-181a  | FCGR2B    | -0.39 |
| hsa-mir-181a  | FLJ22662  | -0.41 |

|               |          |       |
|---------------|----------|-------|
| hsa-mir-181a  | GCNT1    | -0.44 |
| hsa-mir-181a  | GPR128   | -0.15 |
| hsa-mir-181a  | GPT2     | 0.32  |
| hsa-mir-181a  | GRIA2    | 0.45  |
| hsa-mir-181a  | GRK4     | 0.4   |
| hsa-mir-181a  | GSTA4    | 0.47  |
| hsa-mir-181a  | HES5     | 0.46  |
| hsa-mir-181a  | HIP1R    | 0.34  |
| hsa-mir-181a  | IL13RA1  | -0.4  |
| hsa-mir-181a  | IL15RA   | -0.43 |
| hsa-mir-181a  | IL17D    | 0.38  |
| hsa-mir-181a  | KCND2    | 0.43  |
| hsa-mir-181a  | LGALS3   | -0.42 |
| hsa-mir-181a  | MAGI1    | 0.42  |
| hsa-mir-181a  | MAPT     | 0.41  |
| hsa-mir-181a  | MGC24039 | 0.36  |
| hsa-mir-181a  | MMD2     | 0.44  |
| hsa-mir-181a  | MTSS1    | 0.39  |
| hsa-mir-181a  | NCALD    | 0.39  |
| hsa-mir-181a  | NDRG2    | 0.38  |
| hsa-mir-181a  | NEU4     | 0.43  |
| hsa-mir-181a  | NLGN3    | 0.43  |
| hsa-mir-181a  | NXPH1    | 0.42  |
| hsa-mir-181a  | OLIG1    | 0.43  |
| hsa-mir-181a  | OLIG2    | 0.46  |
| hsa-mir-181a  | OMG      | 0.37  |
| hsa-mir-181a  | PHYHIPL  | 0.47  |
| hsa-mir-181a  | PTCHD2   | 0.4   |
| hsa-mir-181a  | RRAS     | -0.42 |
| hsa-mir-181a  | RUFY3    | 0.49  |
| hsa-mir-181a  | S100A4   | -0.46 |
| hsa-mir-181a  | SAA1     | -0.33 |
| hsa-mir-181a  | SAA2     | -0.32 |
| hsa-mir-181a  | SDC2     | -0.36 |
| hsa-mir-181a  | SEC61A2  | 0.42  |
| hsa-mir-181a  | SERPINE1 | -0.42 |
| hsa-mir-181a  | SEZ6L    | 0.41  |
| hsa-mir-181a  | SHD      | 0.45  |
| hsa-mir-181a  | SLITRK2  | 0.42  |
| hsa-mir-181a  | THRA     | 0.42  |
| hsa-mir-181a  | TTYH2    | 0.38  |
| hsa-mir-181a  | VDR      | -0.47 |
| hsa-mir-181a  | ZDHHC22  | 0.44  |
| hsa-mir-181a* | AGPAT2   | -0.41 |
| hsa-mir-181a* | AHNAK2   | -0.4  |
| hsa-mir-181a* | C1orf106 | 0.44  |
| hsa-mir-181a* | C9orf140 | 0.46  |
| hsa-mir-181a* | CEP170L  | 0.3   |
| hsa-mir-181a* | CHD7     | 0.46  |
| hsa-mir-181a* | CLIC1    | -0.37 |
| hsa-mir-181a* | COPZ2    | -0.47 |
| hsa-mir-181a* | CXCL14   | -0.43 |
| hsa-mir-181a* | CXCL3    | -0.37 |

|               |             |       |
|---------------|-------------|-------|
| hsa-mir-181a* | CXXC4       | 0.35  |
| hsa-mir-181a* | CYP27B1     | 0.26  |
| hsa-mir-181a* | DCX         | 0.39  |
| hsa-mir-181a* | DDIT4L      | -0.37 |
| hsa-mir-181a* | FAH         | -0.48 |
| hsa-mir-181a* | GLI1        | -0.12 |
| hsa-mir-181a* | HEBP1       | -0.42 |
| hsa-mir-181a* | KCND2       | 0.34  |
| hsa-mir-181a* | KCNH8       | 0.37  |
| hsa-mir-181a* | KIAA1712    | 0.36  |
| hsa-mir-181a* | LRRC16      | -0.35 |
| hsa-mir-181a* | LUZP2       | 0.28  |
| hsa-mir-181a* | MYT1        | 0.48  |
| hsa-mir-181a* | NKX2-2      | 0.3   |
| hsa-mir-181a* | NPPA        | 0.28  |
| hsa-mir-181a* | NR0B1       | 0.37  |
| hsa-mir-181a* | NXPH1       | 0.36  |
| hsa-mir-181a* | OPLAH       | -0.38 |
| hsa-mir-181a* | PABPC5      | 0.45  |
| hsa-mir-181a* | PDGFRA      | 0.42  |
| hsa-mir-181a* | RP11-35N6.1 | 0.41  |
| hsa-mir-181a* | SERPINF1    | -0.39 |
| hsa-mir-181a* | SLITRK1     | 0.37  |
| hsa-mir-181a* | SREBF1      | -0.33 |
| hsa-mir-181a* | TFAP2A      | 0.29  |
| hsa-mir-181a* | VASN        | -0.4  |
| hsa-mir-181a* | ZFP37       | 0.42  |
| hsa-mir-181a* | ZNF670      | 0.35  |
| hsa-mir-181b  | ABCC3       | -0.37 |
| hsa-mir-181b  | AHNAK2      | -0.38 |
| hsa-mir-181b  | AIM1        | -0.45 |
| hsa-mir-181b  | ALPK1       | -0.42 |
| hsa-mir-181b  | C12orf34    | 0.39  |
| hsa-mir-181b  | C1orf106    | 0.5   |
| hsa-mir-181b  | C1orf75     | 0.5   |
| hsa-mir-181b  | C20orf58    | 0.42  |
| hsa-mir-181b  | C5orf13     | 0.35  |
| hsa-mir-181b  | CAMP        | -0.3  |
| hsa-mir-181b  | CEBPB       | -0.41 |
| hsa-mir-181b  | CLDN23      | -0.44 |
| hsa-mir-181b  | COL8A2      | -0.48 |
| hsa-mir-181b  | CSTA        | -0.39 |
| hsa-mir-181b  | DLL3        | 0.48  |
| hsa-mir-181b  | DRAM        | -0.4  |
| hsa-mir-181b  | F13A1       | -0.45 |
| hsa-mir-181b  | FCGBP       | -0.34 |
| hsa-mir-181b  | FCGR2B      | -0.4  |
| hsa-mir-181b  | FER1L3      | -0.45 |
| hsa-mir-181b  | FOXF1       | 0.05  |
| hsa-mir-181b  | GCNT1       | -0.47 |
| hsa-mir-181b  | IL13RA1     | -0.41 |
| hsa-mir-181b  | IL7R        | -0.4  |
| hsa-mir-181b  | KIAA1712    | 0.36  |

|              |             |       |
|--------------|-------------|-------|
| hsa-mir-181b | LRRN1       | 0.4   |
| hsa-mir-181b | MR1         | -0.36 |
| hsa-mir-181b | MSN         | -0.39 |
| hsa-mir-181b | MYH9        | -0.41 |
| hsa-mir-181b | NEU4        | 0.44  |
| hsa-mir-181b | NXPH1       | 0.43  |
| hsa-mir-181b | OLIG1       | 0.45  |
| hsa-mir-181b | OLIG2       | 0.46  |
| hsa-mir-181b | PBEF1       | -0.31 |
| hsa-mir-181b | PDGFRA      | 0.35  |
| hsa-mir-181b | PLK3        | -0.39 |
| hsa-mir-181b | PROCR       | -0.36 |
| hsa-mir-181b | PRTFDC1     | 0.34  |
| hsa-mir-181b | PSTPIP1     | -0.35 |
| hsa-mir-181b | RARRES1     | -0.34 |
| hsa-mir-181b | RP11-35N6.1 | 0.44  |
| hsa-mir-181b | RUNX2       | -0.45 |
| hsa-mir-181b | SCML1       | -0.28 |
| hsa-mir-181b | SETD5       | 0.32  |
| hsa-mir-181b | SHD         | 0.43  |
| hsa-mir-181b | SOD2        | -0.35 |
| hsa-mir-181b | SQRDL       | -0.37 |
| hsa-mir-181b | STEAP3      | -0.4  |
| hsa-mir-181b | TNFSF4      | -0.41 |
| hsa-mir-181b | VDR         | -0.49 |
| hsa-mir-181c | ABAT        | 0.45  |
| hsa-mir-181c | AMPD3       | -0.42 |
| hsa-mir-181c | APC         | 0.37  |
| hsa-mir-181c | ARHGEF5     | -0.42 |
| hsa-mir-181c | ARPC1B      | -0.48 |
| hsa-mir-181c | ASCL1       | 0.49  |
| hsa-mir-181c | BCAN        | 0.51  |
| hsa-mir-181c | C22orf32    | 0.4   |
| hsa-mir-181c | C6orf134    | 0.38  |
| hsa-mir-181c | CD52        | -0.42 |
| hsa-mir-181c | CDCP1       | -0.46 |
| hsa-mir-181c | CFD         | -0.43 |
| hsa-mir-181c | CHST9       | 0.44  |
| hsa-mir-181c | CIRBP       | 0.39  |
| hsa-mir-181c | CLDN23      | -0.51 |
| hsa-mir-181c | CMTM7       | -0.55 |
| hsa-mir-181c | COL1A1      | -0.5  |
| hsa-mir-181c | COL1A2      | -0.5  |
| hsa-mir-181c | COL6A3      | -0.51 |
| hsa-mir-181c | CRB1        | 0.47  |
| hsa-mir-181c | CSPG5       | 0.5   |
| hsa-mir-181c | CTNND2      | 0.47  |
| hsa-mir-181c | CTSC        | -0.46 |
| hsa-mir-181c | CTSD        | -0.38 |
| hsa-mir-181c | CTSZ        | -0.53 |
| hsa-mir-181c | DAB2        | -0.47 |
| hsa-mir-181c | DCBLD2      | -0.45 |
| hsa-mir-181c | DCLK2       | 0.42  |

|              |           |       |
|--------------|-----------|-------|
| hsa-mir-181c | DKK1      | -0.42 |
| hsa-mir-181c | DLL3      | 0.44  |
| hsa-mir-181c | EMB       | -0.44 |
| hsa-mir-181c | FAM20A    | -0.51 |
| hsa-mir-181c | FAM69B    | 0.5   |
| hsa-mir-181c | FBLN1     | -0.45 |
| hsa-mir-181c | FGFBP3    | 0.43  |
| hsa-mir-181c | FHL2      | -0.49 |
| hsa-mir-181c | FLJ22662  | -0.51 |
| hsa-mir-181c | FXD5      | -0.47 |
| hsa-mir-181c | GALNT12   | -0.43 |
| hsa-mir-181c | GALNT5    | -0.46 |
| hsa-mir-181c | GCLM      | -0.4  |
| hsa-mir-181c | GCN5L2    | 0.31  |
| hsa-mir-181c | GCNT1     | -0.52 |
| hsa-mir-181c | GDAP1L1   | 0.42  |
| hsa-mir-181c | GLT8D4    | -0.49 |
| hsa-mir-181c | GPNMB     | -0.42 |
| hsa-mir-181c | GRIA4     | 0.35  |
| hsa-mir-181c | HTATIP2   | -0.31 |
| hsa-mir-181c | ICA1L     | 0.39  |
| hsa-mir-181c | ID4       | 0.47  |
| hsa-mir-181c | IGSF11    | 0.34  |
| hsa-mir-181c | IL13RA1   | -0.48 |
| hsa-mir-181c | IL17D     | 0.53  |
| hsa-mir-181c | IL7R      | -0.48 |
| hsa-mir-181c | ITGA11    | -0.33 |
| hsa-mir-181c | KCTD9     | -0.47 |
| hsa-mir-181c | LAMB1     | -0.5  |
| hsa-mir-181c | LOC285382 | 0.38  |
| hsa-mir-181c | LRP4      | 0.41  |
| hsa-mir-181c | LRRTM3    | 0.45  |
| hsa-mir-181c | LUM       | -0.51 |
| hsa-mir-181c | LY75      | -0.46 |
| hsa-mir-181c | LY96      | -0.49 |
| hsa-mir-181c | MAPT      | 0.5   |
| hsa-mir-181c | MARK1     | 0.43  |
| hsa-mir-181c | MCFD2     | -0.49 |
| hsa-mir-181c | MCTP2     | -0.42 |
| hsa-mir-181c | MDFIC     | -0.48 |
| hsa-mir-181c | MET       | -0.31 |
| hsa-mir-181c | MGC24103  | -0.45 |
| hsa-mir-181c | MGC52110  | 0.39  |
| hsa-mir-181c | MGC72080  | -0.37 |
| hsa-mir-181c | NANOS3    | 0.52  |
| hsa-mir-181c | NCF2      | -0.42 |
| hsa-mir-181c | NDRG2     | 0.51  |
| hsa-mir-181c | NFIA      | 0.43  |
| hsa-mir-181c | NFIX      | 0.38  |
| hsa-mir-181c | NHS       | -0.32 |
| hsa-mir-181c | NLGN3     | 0.49  |
| hsa-mir-181c | NPC2      | -0.44 |
| hsa-mir-181c | NQO1      | -0.44 |

|              |              |       |
|--------------|--------------|-------|
| hsa-mir-181c | NRP1         | -0.5  |
| hsa-mir-181c | NTRK3        | 0.37  |
| hsa-mir-181c | OBFC2A       | -0.46 |
| hsa-mir-181c | OLIG1        | 0.46  |
| hsa-mir-181c | OLIG2        | 0.49  |
| hsa-mir-181c | P4HA2        | -0.5  |
| hsa-mir-181c | PHF21B       | 0.46  |
| hsa-mir-181c | PHLPP        | 0.43  |
| hsa-mir-181c | PIGP         | -0.45 |
| hsa-mir-181c | PLAUR        | -0.48 |
| hsa-mir-181c | PSD2         | 0.44  |
| hsa-mir-181c | RAB11FIP1    | -0.49 |
| hsa-mir-181c | RAB27A       | -0.53 |
| hsa-mir-181c | RARRES1      | -0.46 |
| hsa-mir-181c | RBM18        | -0.31 |
| hsa-mir-181c | RFTN2        | 0.41  |
| hsa-mir-181c | RNF149       | -0.47 |
| hsa-mir-181c | ROBO2        | 0.36  |
| hsa-mir-181c | RP6-213H19.1 | -0.43 |
| hsa-mir-181c | RUNX2        | -0.58 |
| hsa-mir-181c | S100A11      | -0.52 |
| hsa-mir-181c | S100A4       | -0.45 |
| hsa-mir-181c | SCG3         | 0.5   |
| hsa-mir-181c | SDC1         | -0.45 |
| hsa-mir-181c | SERPINB1     | -0.46 |
| hsa-mir-181c | SERPINE1     | -0.42 |
| hsa-mir-181c | SEZ6L        | 0.47  |
| hsa-mir-181c | SH2B3        | -0.52 |
| hsa-mir-181c | SHC1         | -0.48 |
| hsa-mir-181c | SLC16A9      | 0.47  |
| hsa-mir-181c | SLC24A3      | 0.4   |
| hsa-mir-181c | SLC5A3       | -0.27 |
| hsa-mir-181c | SPHK1        | -0.42 |
| hsa-mir-181c | STRA6        | -0.46 |
| hsa-mir-181c | TADA1L       | 0.36  |
| hsa-mir-181c | TBC1D8B      | -0.45 |
| hsa-mir-181c | TCIRG1       | -0.47 |
| hsa-mir-181c | TIMD4        | -0.38 |
| hsa-mir-181c | TLE2         | 0.34  |
| hsa-mir-181c | TMEM166      | -0.48 |
| hsa-mir-181c | TNFAIP8      | -0.47 |
| hsa-mir-181c | TNFSF4       | -0.47 |
| hsa-mir-181c | TP53BP2      | 0.31  |
| hsa-mir-181c | TPBG         | -0.39 |
| hsa-mir-181c | TRIM9        | 0.43  |
| hsa-mir-181c | TRPV2        | -0.44 |
| hsa-mir-181c | TSPAN3       | 0.43  |
| hsa-mir-181c | VDR          | -0.55 |
| hsa-mir-181c | ZDHHC22      | 0.49  |
| hsa-mir-181c | ZFP14        | 0.39  |
| hsa-mir-181c | ZNF177       | 0.44  |
| hsa-mir-181c | ZNF285A      | 0.47  |
| hsa-mir-181c | ZNF323       | 0.27  |



|              |          |       |
|--------------|----------|-------|
| hsa-mir-181c | ZNF540   | 0.34  |
| hsa-mir-181c | ZNF571   | 0.34  |
| hsa-mir-181c | ZNF606   | 0.38  |
| hsa-mir-181c | ZNF627   | 0.38  |
| hsa-mir-181c | ZNF671   | 0.44  |
| hsa-mir-181c | ZNF711   | 0.44  |
| hsa-mir-181c | ZNF781   | 0.39  |
| hsa-mir-181d | ACCN2    | 0.48  |
| hsa-mir-181d | ACVR2B   | 0.36  |
| hsa-mir-181d | AIM1     | -0.53 |
| hsa-mir-181d | AKR1B10  | -0.32 |
| hsa-mir-181d | ALOX5    | -0.53 |
| hsa-mir-181d | ALPK1    | -0.53 |
| hsa-mir-181d | AMICA1   | -0.52 |
| hsa-mir-181d | AMPD3    | -0.51 |
| hsa-mir-181d | ANKRD5   | -0.42 |
| hsa-mir-181d | ANXA11   | -0.49 |
| hsa-mir-181d | ANXA4    | -0.52 |
| hsa-mir-181d | APC      | 0.34  |
| hsa-mir-181d | ARHGAP9  | -0.5  |
| hsa-mir-181d | ARID2    | 0.37  |
| hsa-mir-181d | ARPC1B   | -0.51 |
| hsa-mir-181d | ASCL1    | 0.53  |
| hsa-mir-181d | BAI1     | 0.47  |
| hsa-mir-181d | BAI3     | 0.46  |
| hsa-mir-181d | BATF     | -0.51 |
| hsa-mir-181d | BCAN     | 0.57  |
| hsa-mir-181d | BCL7A    | 0.53  |
| hsa-mir-181d | BNC2     | -0.55 |
| hsa-mir-181d | C10orf11 | -0.44 |
| hsa-mir-181d | C1orf106 | 0.53  |
| hsa-mir-181d | C1orf38  | -0.48 |
| hsa-mir-181d | C9orf140 | 0.47  |
| hsa-mir-181d | C9orf52  | -0.48 |
| hsa-mir-181d | C9orf95  | -0.49 |
| hsa-mir-181d | CACNA2D4 | -0.49 |
| hsa-mir-181d | CADM2    | 0.46  |
| hsa-mir-181d | CAPG     | -0.45 |
| hsa-mir-181d | CASP5    | -0.47 |
| hsa-mir-181d | CATSPER1 | -0.51 |
| hsa-mir-181d | CCDC122  | -0.38 |
| hsa-mir-181d | CCL5     | -0.49 |
| hsa-mir-181d | CCND2    | 0.45  |
| hsa-mir-181d | CCR2     | -0.5  |
| hsa-mir-181d | CD109    | -0.53 |
| hsa-mir-181d | CD2      | -0.47 |
| hsa-mir-181d | CD27     | -0.5  |
| hsa-mir-181d | CD3G     | -0.42 |
| hsa-mir-181d | CD52     | -0.46 |
| hsa-mir-181d | CDCP1    | -0.5  |
| hsa-mir-181d | CEACAM4  | -0.49 |
| hsa-mir-181d | CEBPB    | -0.47 |
| hsa-mir-181d | CFB      | -0.48 |

|              |          |       |
|--------------|----------|-------|
| hsa-mir-181d | CFD      | -0.5  |
| hsa-mir-181d | CIRBP    | 0.4   |
| hsa-mir-181d | CLDN23   | -0.6  |
| hsa-mir-181d | CLEC2B   | -0.48 |
| hsa-mir-181d | CLIC2    | -0.47 |
| hsa-mir-181d | CMTM7    | -0.58 |
| hsa-mir-181d | COL1A1   | -0.48 |
| hsa-mir-181d | COL1A2   | -0.5  |
| hsa-mir-181d | COL6A3   | -0.51 |
| hsa-mir-181d | COL8A2   | -0.5  |
| hsa-mir-181d | COPZ2    | -0.47 |
| hsa-mir-181d | CRB1     | 0.51  |
| hsa-mir-181d | CSNK1E   | 0.44  |
| hsa-mir-181d | CSPG5    | 0.54  |
| hsa-mir-181d | CST6     | -0.56 |
| hsa-mir-181d | CSTA     | -0.49 |
| hsa-mir-181d | CTNND2   | 0.41  |
| hsa-mir-181d | CTSZ     | -0.59 |
| hsa-mir-181d | CXCR4    | -0.46 |
| hsa-mir-181d | CYP1B1   | -0.5  |
| hsa-mir-181d | DAB2     | -0.51 |
| hsa-mir-181d | DCLK2    | 0.46  |
| hsa-mir-181d | DENND1C  | -0.47 |
| hsa-mir-181d | DKK1     | -0.5  |
| hsa-mir-181d | DLL1     | 0.44  |
| hsa-mir-181d | DLL3     | 0.56  |
| hsa-mir-181d | DPF1     | 0.54  |
| hsa-mir-181d | DSCAM    | 0.56  |
| hsa-mir-181d | DUSP23   | -0.48 |
| hsa-mir-181d | EHBP1L1  | -0.53 |
| hsa-mir-181d | EMB      | -0.51 |
| hsa-mir-181d | ENAH     | 0.49  |
| hsa-mir-181d | EPHB3    | 0.41  |
| hsa-mir-181d | EPN2     | 0.5   |
| hsa-mir-181d | ETV1     | 0.49  |
| hsa-mir-181d | F13A1    | -0.52 |
| hsa-mir-181d | FAH      | -0.53 |
| hsa-mir-181d | FAM110B  | 0.45  |
| hsa-mir-181d | FAM113B  | -0.45 |
| hsa-mir-181d | FAM114A1 | -0.48 |
| hsa-mir-181d | FAM20A   | -0.5  |
| hsa-mir-181d | FAM69B   | 0.56  |
| hsa-mir-181d | FAP      | -0.51 |
| hsa-mir-181d | FAS      | -0.43 |
| hsa-mir-181d | FBLN1    | -0.48 |
| hsa-mir-181d | FCGR2B   | -0.49 |
| hsa-mir-181d | FES      | -0.53 |
| hsa-mir-181d | FGFBP3   | 0.52  |
| hsa-mir-181d | FHL2     | -0.52 |
| hsa-mir-181d | FLJ20273 | -0.46 |
| hsa-mir-181d | FLJ22662 | -0.58 |
| hsa-mir-181d | FUCA1    | -0.49 |
| hsa-mir-181d | FXVD5    | -0.56 |

|              |           |       |
|--------------|-----------|-------|
| hsa-mir-181d | GAD1      | 0.37  |
| hsa-mir-181d | GALNT12   | -0.41 |
| hsa-mir-181d | GCLM      | -0.48 |
| hsa-mir-181d | GCNT1     | -0.62 |
| hsa-mir-181d | GLCCI1    | 0.49  |
| hsa-mir-181d | GLT8D4    | -0.56 |
| hsa-mir-181d | GRIA2     | 0.46  |
| hsa-mir-181d | GTF2I     | 0.39  |
| hsa-mir-181d | HEBP1     | -0.46 |
| hsa-mir-181d | HES5      | 0.44  |
| hsa-mir-181d | HHAT      | -0.4  |
| hsa-mir-181d | HIP1R     | 0.39  |
| hsa-mir-181d | HIST1H4C  | 0.32  |
| hsa-mir-181d | IER3      | -0.48 |
| hsa-mir-181d | IFI30     | -0.47 |
| hsa-mir-181d | IGHM      | -0.41 |
| hsa-mir-181d | IGSF11    | 0.39  |
| hsa-mir-181d | IL10RA    | -0.52 |
| hsa-mir-181d | IL13RA1   | -0.54 |
| hsa-mir-181d | IL15      | -0.51 |
| hsa-mir-181d | IL17D     | 0.5   |
| hsa-mir-181d | IL18R1    | -0.49 |
| hsa-mir-181d | IL1R1     | -0.52 |
| hsa-mir-181d | IL2RB     | -0.46 |
| hsa-mir-181d | IL7R      | -0.55 |
| hsa-mir-181d | ITGA11    | -0.41 |
| hsa-mir-181d | KCTD9     | -0.5  |
| hsa-mir-181d | KDELR3    | -0.5  |
| hsa-mir-181d | KLF12     | 0.42  |
| hsa-mir-181d | LGALS8    | -0.44 |
| hsa-mir-181d | LILRB2    | -0.52 |
| hsa-mir-181d | LOC285382 | 0.46  |
| hsa-mir-181d | LOC493869 | -0.44 |
| hsa-mir-181d | LRRN1     | 0.46  |
| hsa-mir-181d | LRRTM3    | 0.49  |
| hsa-mir-181d | LTB       | -0.5  |
| hsa-mir-181d | LUM       | -0.49 |
| hsa-mir-181d | LY75      | -0.51 |
| hsa-mir-181d | LY96      | -0.55 |
| hsa-mir-181d | MAFB      | -0.49 |
| hsa-mir-181d | MAGI1     | 0.45  |
| hsa-mir-181d | MAN1A1    | -0.5  |
| hsa-mir-181d | MAPT      | 0.48  |
| hsa-mir-181d | MARK1     | 0.5   |
| hsa-mir-181d | MCFD2     | -0.57 |
| hsa-mir-181d | MDFIC     | -0.54 |
| hsa-mir-181d | MEIS3     | 0.39  |
| hsa-mir-181d | MEX3A     | 0.5   |
| hsa-mir-181d | MFAP5     | -0.53 |
| hsa-mir-181d | MGC24039  | 0.36  |
| hsa-mir-181d | MGC24103  | -0.5  |
| hsa-mir-181d | MGC87042  | -0.46 |
| hsa-mir-181d | MGST1     | -0.44 |

|              |              |       |
|--------------|--------------|-------|
| hsa-mir-181d | MICALCL      | -0.5  |
| hsa-mir-181d | MR1          | -0.44 |
| hsa-mir-181d | MS4A4A       | -0.44 |
| hsa-mir-181d | NCAN         | 0.43  |
| hsa-mir-181d | NCF2         | -0.47 |
| hsa-mir-181d | NDRG2        | 0.46  |
| hsa-mir-181d | NEU4         | 0.5   |
| hsa-mir-181d | NFIA         | 0.41  |
| hsa-mir-181d | NLGN3        | 0.56  |
| hsa-mir-181d | NOL4         | 0.35  |
| hsa-mir-181d | NOTCH1       | 0.43  |
| hsa-mir-181d | NOVA1        | 0.51  |
| hsa-mir-181d | NPC2         | -0.53 |
| hsa-mir-181d | NQO1         | -0.49 |
| hsa-mir-181d | NRP1         | -0.51 |
| hsa-mir-181d | NT5DC1       | -0.46 |
| hsa-mir-181d | NXPH1        | 0.51  |
| hsa-mir-181d | OBFC2A       | -0.5  |
| hsa-mir-181d | OGFRL1       | -0.42 |
| hsa-mir-181d | OLIG1        | 0.53  |
| hsa-mir-181d | OLIG2        | 0.56  |
| hsa-mir-181d | OSTF1        | -0.5  |
| hsa-mir-181d | P2RY2        | -0.47 |
| hsa-mir-181d | P4HA2        | -0.58 |
| hsa-mir-181d | PCMTD2       | 0.42  |
| hsa-mir-181d | PHF21B       | 0.5   |
| hsa-mir-181d | PHLPP        | 0.49  |
| hsa-mir-181d | PHYHIPL      | 0.45  |
| hsa-mir-181d | PIGP         | -0.48 |
| hsa-mir-181d | PLAUR        | -0.5  |
| hsa-mir-181d | POLD4        | -0.51 |
| hsa-mir-181d | PROCR        | -0.5  |
| hsa-mir-181d | PTGER4       | -0.44 |
| hsa-mir-181d | PTOV1        | 0.42  |
| hsa-mir-181d | PTPLAD2      | -0.5  |
| hsa-mir-181d | PYCARD       | -0.5  |
| hsa-mir-181d | PYDC1        | -0.45 |
| hsa-mir-181d | RAB11FIP1    | -0.54 |
| hsa-mir-181d | RAB27A       | -0.55 |
| hsa-mir-181d | RABGAP1L     | -0.52 |
| hsa-mir-181d | RARRES1      | -0.48 |
| hsa-mir-181d | RBKS         | -0.43 |
| hsa-mir-181d | RBM12        | 0.42  |
| hsa-mir-181d | Rgr          | -0.41 |
| hsa-mir-181d | RHBDF2       | -0.52 |
| hsa-mir-181d | RHOH         | -0.42 |
| hsa-mir-181d | RNF149       | -0.55 |
| hsa-mir-181d | RP6-213H19.1 | -0.46 |
| hsa-mir-181d | RRAS         | -0.46 |
| hsa-mir-181d | RUFY3        | 0.56  |
| hsa-mir-181d | RUNX2        | -0.64 |
| hsa-mir-181d | S100A11      | -0.53 |
| hsa-mir-181d | S100A4       | -0.51 |

|              |          |       |
|--------------|----------|-------|
| hsa-mir-181d | SALL3    | 0.49  |
| hsa-mir-181d | SCG3     | 0.51  |
| hsa-mir-181d | SDC2     | -0.44 |
| hsa-mir-181d | SELM     | -0.4  |
| hsa-mir-181d | SERPINB1 | -0.52 |
| hsa-mir-181d | SERPINF1 | -0.47 |
| hsa-mir-181d | SETD5    | 0.41  |
| hsa-mir-181d | SEZ6L    | 0.51  |
| hsa-mir-181d | SH2B3    | -0.51 |
| hsa-mir-181d | SH2D2A   | -0.43 |
| hsa-mir-181d | SHC1     | -0.52 |
| hsa-mir-181d | SHC2     | 0.41  |
| hsa-mir-181d | SHC3     | 0.39  |
| hsa-mir-181d | SKAP2    | -0.32 |
| hsa-mir-181d | SLC24A5  | 0.54  |
| hsa-mir-181d | SLC27A6  | -0.36 |
| hsa-mir-181d | SLC39A11 | -0.28 |
| hsa-mir-181d | SLC39A8  | -0.43 |
| hsa-mir-181d | SOX4     | 0.45  |
| hsa-mir-181d | SQRDL    | -0.5  |
| hsa-mir-181d | STEAP1   | -0.48 |
| hsa-mir-181d | SUMF1    | -0.5  |
| hsa-mir-181d | TBC1D10C | -0.49 |
| hsa-mir-181d | TBC1D8B  | -0.48 |
| hsa-mir-181d | TCIRG1   | -0.53 |
| hsa-mir-181d | TES      | -0.46 |
| hsa-mir-181d | TGFBI    | -0.45 |
| hsa-mir-181d | TMEM145  | 0.5   |
| hsa-mir-181d | TMEM26   | -0.41 |
| hsa-mir-181d | TNFAIP8  | -0.54 |
| hsa-mir-181d | TNFSF4   | -0.54 |
| hsa-mir-181d | TPBG     | -0.51 |
| hsa-mir-181d | TRIM9    | 0.47  |
| hsa-mir-181d | TRPV2    | -0.47 |
| hsa-mir-181d | TSPAN3   | 0.46  |
| hsa-mir-181d | TTYH2    | 0.32  |
| hsa-mir-181d | VDR      | -0.62 |
| hsa-mir-181d | WIPF1    | -0.52 |
| hsa-mir-181d | XCL2     | -0.44 |
| hsa-mir-181d | ZDHHC22  | 0.53  |
| hsa-mir-181d | ZFP14    | 0.44  |
| hsa-mir-181d | ZNF146   | 0.3   |
| hsa-mir-181d | ZNF177   | 0.51  |
| hsa-mir-181d | ZNF185   | -0.43 |
| hsa-mir-181d | ZNF228   | 0.39  |
| hsa-mir-181d | ZNF285A  | 0.51  |
| hsa-mir-181d | ZNF397   | 0.42  |
| hsa-mir-181d | ZNF428   | 0.41  |
| hsa-mir-181d | ZNF429   | 0.31  |
| hsa-mir-181d | ZNF606   | 0.48  |
| hsa-mir-181d | ZNF671   | 0.45  |
| hsa-mir-181d | ZNF711   | 0.49  |
| hsa-mir-181d | ZNF781   | 0.45  |

|             |            |       |
|-------------|------------|-------|
| hsa-mir-182 | ABCG5      | 0.1   |
| hsa-mir-182 | ADORA3     | -0.22 |
| hsa-mir-182 | ALDH1A1    | -0.31 |
| hsa-mir-182 | ANK2       | -0.13 |
| hsa-mir-182 | ANKRD45    | -0.39 |
| hsa-mir-182 | ANP32C     | 0.24  |
| hsa-mir-182 | ARMC3      | -0.27 |
| hsa-mir-182 | ASPA       | -0.34 |
| hsa-mir-182 | BMP5       | 0.21  |
| hsa-mir-182 | C12orf28   | 0.3   |
| hsa-mir-182 | C13orf31   | -0.28 |
| hsa-mir-182 | C16orf73   | 0.2   |
| hsa-mir-182 | C1orf53    | -0.09 |
| hsa-mir-182 | C21orf62   | -0.1  |
| hsa-mir-182 | C4orf31    | -0.09 |
| hsa-mir-182 | C5orf32    | -0.33 |
| hsa-mir-182 | C6orf165   | -0.29 |
| hsa-mir-182 | C9orf18    | -0.26 |
| hsa-mir-182 | CCL7       | -0.23 |
| hsa-mir-182 | CD163      | -0.18 |
| hsa-mir-182 | CDC34      | 0.35  |
| hsa-mir-182 | CDCA3      | 0.29  |
| hsa-mir-182 | CDKN2AIPNL | 0.37  |
| hsa-mir-182 | CHST8      | 0.26  |
| hsa-mir-182 | CHTF18     | 0.34  |
| hsa-mir-182 | CLIP4      | -0.27 |
| hsa-mir-182 | CLRN3      | -0.38 |
| hsa-mir-182 | COL25A1    | 0.32  |
| hsa-mir-182 | CPM        | -0.11 |
| hsa-mir-182 | CTSO       | -0.16 |
| hsa-mir-182 | DACH1      | -0.13 |
| hsa-mir-182 | DCDC2      | -0.34 |
| hsa-mir-182 | DDX3Y      | 0.12  |
| hsa-mir-182 | DKK1       | -0.21 |
| hsa-mir-182 | DMBX1      | 0.14  |
| hsa-mir-182 | DMGDH      | -0.17 |
| hsa-mir-182 | DNAH9      | -0.28 |
| hsa-mir-182 | DNMT3B     | 0.34  |
| hsa-mir-182 | DOT1L      | 0.4   |
| hsa-mir-182 | DSEL       | 0.33  |
| hsa-mir-182 | DST        | -0.09 |
| hsa-mir-182 | DUSP13     | -0.04 |
| hsa-mir-182 | DYNLRB2    | -0.29 |
| hsa-mir-182 | EDG1       | -0.24 |
| hsa-mir-182 | EIF4E3     | -0.35 |
| hsa-mir-182 | ENPP5      | -0.27 |
| hsa-mir-182 | EXOSC5     | 0.24  |
| hsa-mir-182 | EYA1       | -0.03 |
| hsa-mir-182 | FABP1      | 0.07  |
| hsa-mir-182 | FAM81B     | -0.34 |
| hsa-mir-182 | FAM92B     | -0.3  |
| hsa-mir-182 | FANCA      | 0.27  |
| hsa-mir-182 | FGB        | 0.14  |

|             |           |       |
|-------------|-----------|-------|
| hsa-mir-182 | FLJ41603  | -0.38 |
| hsa-mir-182 | FLJ46266  | -0.31 |
| hsa-mir-182 | FLT3      | -0.36 |
| hsa-mir-182 | FOXA1     | 0.16  |
| hsa-mir-182 | FOXA3     | 0.14  |
| hsa-mir-182 | FUS       | 0.32  |
| hsa-mir-182 | FYB       | -0.24 |
| hsa-mir-182 | GAS1      | 0.39  |
| hsa-mir-182 | GBAS      | 0.12  |
| hsa-mir-182 | GBP3      | -0.28 |
| hsa-mir-182 | GCNT2     | 0.38  |
| hsa-mir-182 | GDF3      | 0.01  |
| hsa-mir-182 | GGTA1     | -0.18 |
| hsa-mir-182 | GPC5      | -0.21 |
| hsa-mir-182 | GPR34     | -0.21 |
| hsa-mir-182 | GPR75     | -0.26 |
| hsa-mir-182 | GPR92     | -0.18 |
| hsa-mir-182 | GRTP1     | -0.07 |
| hsa-mir-182 | GSTM4     | -0.17 |
| hsa-mir-182 | GUCY1B2   | 0.05  |
| hsa-mir-182 | HAMP      | -0.23 |
| hsa-mir-182 | HORMAD2   | -0.2  |
| hsa-mir-182 | HOXB6     | -0.06 |
| hsa-mir-182 | HOXB8     | 0.03  |
| hsa-mir-182 | HOXB9     | 0.02  |
| hsa-mir-182 | HPR       | -0.05 |
| hsa-mir-182 | HRASLS3   | -0.36 |
| hsa-mir-182 | HTATIP2   | -0.23 |
| hsa-mir-182 | IL13RA2   | -0.14 |
| hsa-mir-182 | IL33      | -0.16 |
| hsa-mir-182 | IL6ST     | -0.21 |
| hsa-mir-182 | KCNK5     | 0.11  |
| hsa-mir-182 | KIAA1576  | -0.22 |
| hsa-mir-182 | KPTN      | 0.34  |
| hsa-mir-182 | KREMEN2   | 0.02  |
| hsa-mir-182 | KRT33A    | 0.15  |
| hsa-mir-182 | L1TD1     | 0.08  |
| hsa-mir-182 | LACTB2    | -0.11 |
| hsa-mir-182 | LDHC      | 0.07  |
| hsa-mir-182 | LIN28B    | 0.15  |
| hsa-mir-182 | LMNB1     | 0.34  |
| hsa-mir-182 | LOC285141 | -0.38 |
| hsa-mir-182 | LOC441601 | 0.14  |
| hsa-mir-182 | LOH12CR1  | -0.2  |
| hsa-mir-182 | LPHN2     | 0.26  |
| hsa-mir-182 | LRRC6     | -0.3  |
| hsa-mir-182 | MAGEB6    | 0.24  |
| hsa-mir-182 | MAGEC1    | 0.2   |
| hsa-mir-182 | MAGEC2    | 0.15  |
| hsa-mir-182 | MAOA      | -0.27 |
| hsa-mir-182 | MATN4     | 0.2   |
| hsa-mir-182 | MEGF10    | -0.33 |
| hsa-mir-182 | MGC3771   | -0.27 |

|             |          |       |
|-------------|----------|-------|
| hsa-mir-182 | MMP12    | 0.09  |
| hsa-mir-182 | MMRN1    | -0.08 |
| hsa-mir-182 | MS4A1    | 0.09  |
| hsa-mir-182 | MSMB     | 0.14  |
| hsa-mir-182 | MYBL2    | 0.34  |
| hsa-mir-182 | MYBPC1   | -0.25 |
| hsa-mir-182 | MYL1     | 0.12  |
| hsa-mir-182 | MYOZ1    | -0.19 |
| hsa-mir-182 | MYPN     | 0.18  |
| hsa-mir-182 | NEUROD1  | 0.3   |
| hsa-mir-182 | NINJ1    | -0.31 |
| hsa-mir-182 | NOL4     | 0.05  |
| hsa-mir-182 | NOS2A    | 0.33  |
| hsa-mir-182 | NPPB     | 0.14  |
| hsa-mir-182 | NR1H4    | 0.1   |
| hsa-mir-182 | NUDT18   | -0.38 |
| hsa-mir-182 | OLR1     | -0.26 |
| hsa-mir-182 | OR51I1   | 0.05  |
| hsa-mir-182 | P2RY12   | -0.15 |
| hsa-mir-182 | P2RY14   | -0.11 |
| hsa-mir-182 | PAX3     | 0.06  |
| hsa-mir-182 | PCDHB3   | 0.15  |
| hsa-mir-182 | PDZK1    | -0.08 |
| hsa-mir-182 | PGF      | 0.17  |
| hsa-mir-182 | PIR      | -0.24 |
| hsa-mir-182 | PITX2    | 0.06  |
| hsa-mir-182 | PIWIL2   | 0.19  |
| hsa-mir-182 | PLA2G2A  | 0.07  |
| hsa-mir-182 | PMP2     | -0.09 |
| hsa-mir-182 | POU3F2   | 0.23  |
| hsa-mir-182 | POU4F1   | 0.15  |
| hsa-mir-182 | PRMT1    | 0.41  |
| hsa-mir-182 | PROM1    | 0.02  |
| hsa-mir-182 | PRSS1    | 0.1   |
| hsa-mir-182 | QTRT1    | 0.33  |
| hsa-mir-182 | RAB36    | -0.28 |
| hsa-mir-182 | REG1B    | 0.3   |
| hsa-mir-182 | RGS18    | -0.28 |
| hsa-mir-182 | RIT2     | -0.15 |
| hsa-mir-182 | RORB     | -0.19 |
| hsa-mir-182 | RPS4Y1   | 0.11  |
| hsa-mir-182 | RPS4Y2   | 0.12  |
| hsa-mir-182 | RSPH1    | -0.29 |
| hsa-mir-182 | RTDR1    | -0.33 |
| hsa-mir-182 | SCGB1D1  | -0.2  |
| hsa-mir-182 | SEMA3E   | -0.2  |
| hsa-mir-182 | SERPINB2 | 0.08  |
| hsa-mir-182 | SFRP1    | 0.17  |
| hsa-mir-182 | SFRS16   | 0.27  |
| hsa-mir-182 | SHF      | 0.4   |
| hsa-mir-182 | SLC17A2  | 0.17  |
| hsa-mir-182 | SLC22A15 | -0.37 |
| hsa-mir-182 | SLC39A12 | -0.19 |



|             |           |       |
|-------------|-----------|-------|
| hsa-mir-182 | SLC44A3   | -0.22 |
| hsa-mir-182 | SLC6A4    | 0.16  |
| hsa-mir-182 | SLC9A11   | -0.29 |
| hsa-mir-182 | SLCO6A1   | 0.39  |
| hsa-mir-182 | SLIT2     | -0.06 |
| hsa-mir-182 | SMYD2     | 0.37  |
| hsa-mir-182 | SPATA4    | -0.35 |
| hsa-mir-182 | SPEF2     | -0.27 |
| hsa-mir-182 | SPINK5    | 0.16  |
| hsa-mir-182 | SPRR1B    | 0.15  |
| hsa-mir-182 | SRGAP1    | -0.04 |
| hsa-mir-182 | SRM       | 0.27  |
| hsa-mir-182 | SULF1     | -0.31 |
| hsa-mir-182 | SULT1B1   | -0.22 |
| hsa-mir-182 | TACSTD1   | -0.08 |
| hsa-mir-182 | TFPI2     | -0.14 |
| hsa-mir-182 | TGFB2     | -0.12 |
| hsa-mir-182 | THEM4     | -0.13 |
| hsa-mir-182 | TIMM44    | 0.35  |
| hsa-mir-182 | TLE2      | 0.3   |
| hsa-mir-182 | TLR10     | -0.04 |
| hsa-mir-182 | TLR4      | -0.4  |
| hsa-mir-182 | TLR5      | -0.36 |
| hsa-mir-182 | TMSL8     | 0.1   |
| hsa-mir-182 | TNFAIP8L2 | -0.29 |
| hsa-mir-182 | TRPM8     | -0.22 |
| hsa-mir-182 | TYR       | 0.1   |
| hsa-mir-182 | UBE2S     | 0.36  |
| hsa-mir-182 | UGT2B10   | 0.11  |
| hsa-mir-182 | UTS2      | 0.02  |
| hsa-mir-182 | VILL      | -0.23 |
| hsa-mir-182 | WDR63     | -0.33 |
| hsa-mir-182 | WFDC2     | -0.21 |
| hsa-mir-182 | ZIK1      | 0.4   |
| hsa-mir-182 | ZNF214    | -0.18 |
| hsa-mir-182 | ZNF366    | -0.12 |
| hsa-mir-182 | ZNF385    | -0.29 |
| hsa-mir-182 | ZNF766    | 0.22  |
| hsa-mir-182 | ZNF77     | 0.42  |
| hsa-mir-183 | ABCC2     | 0.07  |
| hsa-mir-183 | ABCC9     | -0.17 |
| hsa-mir-183 | ABCG5     | 0.08  |
| hsa-mir-183 | ACF       | 0.11  |
| hsa-mir-183 | ACSM2B    | 0.11  |
| hsa-mir-183 | ACSM3     | 0.1   |
| hsa-mir-183 | ACTBL1    | 0.14  |
| hsa-mir-183 | ACTL8     | 0.1   |
| hsa-mir-183 | ADCY4     | -0.15 |
| hsa-mir-183 | AFMID     | 0.17  |
| hsa-mir-183 | AFP       | 0.08  |
| hsa-mir-183 | AGR2      | 0.07  |
| hsa-mir-183 | AHSG      | 0.07  |
| hsa-mir-183 | ALB       | 0.14  |

|             |           |       |
|-------------|-----------|-------|
| hsa-mir-183 | AMHR2     | 0.15  |
| hsa-mir-183 | AMTN      | 0.06  |
| hsa-mir-183 | ANKIB1    | -0.15 |
| hsa-mir-183 | ANKRD45   | -0.35 |
| hsa-mir-183 | ANP32C    | 0.2   |
| hsa-mir-183 | APOA2     | 0.09  |
| hsa-mir-183 | APOA5     | 0.12  |
| hsa-mir-183 | APOB      | 0.06  |
| hsa-mir-183 | APOC3     | 0.07  |
| hsa-mir-183 | APOF      | 0.1   |
| hsa-mir-183 | APOH      | 0.13  |
| hsa-mir-183 | AQP3      | 0.05  |
| hsa-mir-183 | ARSF      | -0.05 |
| hsa-mir-183 | ART4      | 0.14  |
| hsa-mir-183 | ATAD4     | 0.11  |
| hsa-mir-183 | ATP8B4    | -0.15 |
| hsa-mir-183 | AURKC     | 0.2   |
| hsa-mir-183 | BAAT      | 0.1   |
| hsa-mir-183 | BAIAP2L1  | 0.1   |
| hsa-mir-183 | BIRC4     | -0.2  |
| hsa-mir-183 | BMP2K     | -0.28 |
| hsa-mir-183 | BMP4      | -0.02 |
| hsa-mir-183 | C10orf122 | 0.11  |
| hsa-mir-183 | C10orf82  | 0.06  |
| hsa-mir-183 | C10orf95  | 0.04  |
| hsa-mir-183 | C14orf115 | 0.09  |
| hsa-mir-183 | C14orf73  | 0.13  |
| hsa-mir-183 | C16orf73  | 0.2   |
| hsa-mir-183 | C18orf2   | 0.19  |
| hsa-mir-183 | C19orf21  | 0.09  |
| hsa-mir-183 | C1orf172  | 0.03  |
| hsa-mir-183 | C21orf125 | 0.14  |
| hsa-mir-183 | C2orf48   | 0.18  |
| hsa-mir-183 | C4BPB     | 0.06  |
| hsa-mir-183 | C6orf123  | 0.23  |
| hsa-mir-183 | C6orf156  | 0.16  |
| hsa-mir-183 | C8A       | 0.13  |
| hsa-mir-183 | C8B       | 0.11  |
| hsa-mir-183 | CALML5    | 0.11  |
| hsa-mir-183 | CASC4     | -0.2  |
| hsa-mir-183 | CD163     | -0.17 |
| hsa-mir-183 | CD1A      | 0.07  |
| hsa-mir-183 | CD1E      | 0.1   |
| hsa-mir-183 | CD8B      | 0.01  |
| hsa-mir-183 | CDC25A    | 0.28  |
| hsa-mir-183 | CDH16     | 0.17  |
| hsa-mir-183 | CEACAM5   | 0.1   |
| hsa-mir-183 | CEACAM6   | 0.08  |
| hsa-mir-183 | CGA       | 0.09  |
| hsa-mir-183 | CLDN6     | 0.13  |
| hsa-mir-183 | CLRN3     | -0.34 |
| hsa-mir-183 | CMKLR1    | -0.26 |
| hsa-mir-183 | COL25A1   | 0.24  |

|             |          |       |
|-------------|----------|-------|
| hsa-mir-183 | COL2A1   | 0.24  |
| hsa-mir-183 | COX6C    | -0.27 |
| hsa-mir-183 | CPB2     | 0.18  |
| hsa-mir-183 | CPN1     | 0.1   |
| hsa-mir-183 | CR1L     | -0.02 |
| hsa-mir-183 | CREB3L3  | 0.13  |
| hsa-mir-183 | CTCFL    | 0.08  |
| hsa-mir-183 | CYP1A1   | 0.12  |
| hsa-mir-183 | CYP24A1  | 0.04  |
| hsa-mir-183 | CYP2F1   | 0.14  |
| hsa-mir-183 | DMBX1    | 0.11  |
| hsa-mir-183 | DNAH8    | 0.12  |
| hsa-mir-183 | DNMT3L   | 0.1   |
| hsa-mir-183 | DPPA2    | 0.04  |
| hsa-mir-183 | DPPA4    | 0.03  |
| hsa-mir-183 | DPYSL5   | 0     |
| hsa-mir-183 | DQX1     | 0.11  |
| hsa-mir-183 | DSCR8    | 0.12  |
| hsa-mir-183 | DSG3     | 0.01  |
| hsa-mir-183 | DST      | -0.1  |
| hsa-mir-183 | DUSP13   | -0.03 |
| hsa-mir-183 | ELA2A    | 0.01  |
| hsa-mir-183 | ELA3A    | 0.07  |
| hsa-mir-183 | ESX1     | 0.18  |
| hsa-mir-183 | EXOSC5   | 0.22  |
| hsa-mir-183 | FAIM3    | -0.01 |
| hsa-mir-183 | FAM83A   | 0.14  |
| hsa-mir-183 | FAM83B   | 0.09  |
| hsa-mir-183 | FAM9B    | 0.11  |
| hsa-mir-183 | FBXL21   | 0.12  |
| hsa-mir-183 | FGA      | 0.1   |
| hsa-mir-183 | FGB      | 0.11  |
| hsa-mir-183 | FGF23    | 0.18  |
| hsa-mir-183 | FGG      | 0.13  |
| hsa-mir-183 | FGL2     | -0.17 |
| hsa-mir-183 | FLJ32658 | 0.1   |
| hsa-mir-183 | FLJ34047 | 0.1   |
| hsa-mir-183 | FLJ35767 | 0.06  |
| hsa-mir-183 | FLJ40298 | -0.31 |
| hsa-mir-183 | FLJ46111 | 0.12  |
| hsa-mir-183 | FLT3     | -0.32 |
| hsa-mir-183 | FOXA1    | 0.15  |
| hsa-mir-183 | FOXA2    | 0.09  |
| hsa-mir-183 | FOXA3    | 0.1   |
| hsa-mir-183 | FTCD     | 0.11  |
| hsa-mir-183 | FUS      | 0.29  |
| hsa-mir-183 | G6PC     | 0.07  |
| hsa-mir-183 | GAGE1    | 0.16  |
| hsa-mir-183 | GCNT2    | 0.37  |
| hsa-mir-183 | GCNT3    | 0.03  |
| hsa-mir-183 | GDF3     | 0     |
| hsa-mir-183 | GDF6     | 0.12  |
| hsa-mir-183 | GEFT     | 0.2   |

|             |           |       |
|-------------|-----------|-------|
| hsa-mir-183 | GFI1B     | 0.14  |
| hsa-mir-183 | GJB7      | 0.2   |
| hsa-mir-183 | GPR34     | -0.17 |
| hsa-mir-183 | GPR75     | -0.22 |
| hsa-mir-183 | GPX2      | 0.09  |
| hsa-mir-183 | GSTA2     | -0.03 |
| hsa-mir-183 | GSTA3     | 0.1   |
| hsa-mir-183 | GSTA5     | 0.05  |
| hsa-mir-183 | GYPB      | 0.13  |
| hsa-mir-183 | GYPE      | 0.07  |
| hsa-mir-183 | HAND1     | 0.15  |
| hsa-mir-183 | HBE1      | 0.08  |
| hsa-mir-183 | hCG_16001 | 0.06  |
| hsa-mir-183 | HDGF2     | 0.33  |
| hsa-mir-183 | HFE2      | 0.05  |
| hsa-mir-183 | HNRNPA0   | 0.31  |
| hsa-mir-183 | HORMAD2   | -0.15 |
| hsa-mir-183 | HOXB13    | -0.04 |
| hsa-mir-183 | HOXB9     | 0.01  |
| hsa-mir-183 | HPDL      | 0.05  |
| hsa-mir-183 | HSD17B2   | 0.14  |
| hsa-mir-183 | HSH2D     | 0.07  |
| hsa-mir-183 | ICAM4     | 0.09  |
| hsa-mir-183 | IGF2BP1   | 0.1   |
| hsa-mir-183 | IGLV2-14  | 0.09  |
| hsa-mir-183 | IL1A      | -0.28 |
| hsa-mir-183 | IL23R     | 0.11  |
| hsa-mir-183 | INSL5     | -0.18 |
| hsa-mir-183 | IRX4      | 0.01  |
| hsa-mir-183 | ISX       | 0.09  |
| hsa-mir-183 | ITGAM     | -0.24 |
| hsa-mir-183 | ITGB1BP3  | -0.02 |
| hsa-mir-183 | ITIH3     | 0.07  |
| hsa-mir-183 | KCNG3     | 0.1   |
| hsa-mir-183 | KCNK13    | -0.17 |
| hsa-mir-183 | KDR       | -0.05 |
| hsa-mir-183 | KIAA0494  | -0.22 |
| hsa-mir-183 | KIAA0825  | 0.07  |
| hsa-mir-183 | KIAA1370  | 0.03  |
| hsa-mir-183 | KIAA1822L | 0.08  |
| hsa-mir-183 | KLF1      | 0.13  |
| hsa-mir-183 | KLHDC6    | -0.15 |
| hsa-mir-183 | KLK1      | 0.03  |
| hsa-mir-183 | KLK10     | -0.04 |
| hsa-mir-183 | KLK11     | 0.09  |
| hsa-mir-183 | KLK8      | 0.02  |
| hsa-mir-183 | KLRB1     | -0.27 |
| hsa-mir-183 | KRT13     | 0.1   |
| hsa-mir-183 | KRT16     | 0.09  |
| hsa-mir-183 | KRT23     | 0.11  |
| hsa-mir-183 | KRT33A    | 0.13  |
| hsa-mir-183 | KRT34     | 0.06  |
| hsa-mir-183 | KRT37     | 0.11  |

|             |           |       |
|-------------|-----------|-------|
| hsa-mir-183 | KRT6A     | 0.14  |
| hsa-mir-183 | KRT6C     | 0.12  |
| hsa-mir-183 | KRT86     | 0.15  |
| hsa-mir-183 | KRTAP1-5  | 0.1   |
| hsa-mir-183 | KRTAP3-1  | 0.09  |
| hsa-mir-183 | KRTDAP    | 0.08  |
| hsa-mir-183 | L1TD1     | 0.06  |
| hsa-mir-183 | L3MBTL4   | -0.19 |
| hsa-mir-183 | LAMA2     | -0.1  |
| hsa-mir-183 | LCT       | 0.1   |
| hsa-mir-183 | LDHC      | 0.06  |
| hsa-mir-183 | LDLRAD1   | 0.15  |
| hsa-mir-183 | LIN28     | 0.08  |
| hsa-mir-183 | LIN28B    | 0.13  |
| hsa-mir-183 | LOC129293 | 0     |
| hsa-mir-183 | LOC388524 | 0.14  |
| hsa-mir-183 | LOC441601 | 0.11  |
| hsa-mir-183 | MAGEA10   | 0.11  |
| hsa-mir-183 | MAGEA4    | 0.14  |
| hsa-mir-183 | MAGEA5    | 0.1   |
| hsa-mir-183 | MAGEA8    | 0.12  |
| hsa-mir-183 | MAGEA9    | 0.18  |
| hsa-mir-183 | MAGEB6    | 0.24  |
| hsa-mir-183 | MAGEC1    | 0.19  |
| hsa-mir-183 | MAGEC2    | 0.15  |
| hsa-mir-183 | MBL2      | 0.05  |
| hsa-mir-183 | MGC102966 | 0.06  |
| hsa-mir-183 | MGC10981  | 0.07  |
| hsa-mir-183 | MGC45800  | 0.03  |
| hsa-mir-183 | MIRH1     | 0.22  |
| hsa-mir-183 | MLANA     | 0.11  |
| hsa-mir-183 | MMP12     | 0.07  |
| hsa-mir-183 | MMRN1     | -0.07 |
| hsa-mir-183 | MPEG1     | -0.18 |
| hsa-mir-183 | MPZL3     | 0.07  |
| hsa-mir-183 | MRGPRX3   | 0.07  |
| hsa-mir-183 | MRO       | -0.24 |
| hsa-mir-183 | MS4A1     | 0.06  |
| hsa-mir-183 | MS4A3     | 0.12  |
| hsa-mir-183 | MS4A7     | -0.16 |
| hsa-mir-183 | MSMB      | 0.11  |
| hsa-mir-183 | MUC15     | 0.22  |
| hsa-mir-183 | MUC16     | 0.12  |
| hsa-mir-183 | MYBL2     | 0.29  |
| hsa-mir-183 | MYEOV     | 0.08  |
| hsa-mir-183 | MYH2      | 0.1   |
| hsa-mir-183 | MYL1      | 0.09  |
| hsa-mir-183 | MYL7      | 0.14  |
| hsa-mir-183 | MYLC2PL   | 0.1   |
| hsa-mir-183 | MYPN      | 0.16  |
| hsa-mir-183 | NANOGP1   | 0.06  |
| hsa-mir-183 | NAT8      | 0.11  |
| hsa-mir-183 | NLRP11    | 0.23  |

|             |          |       |
|-------------|----------|-------|
| hsa-mir-183 | NLRP7    | 0.06  |
| hsa-mir-183 | NOTUM    | 0.07  |
| hsa-mir-183 | NPFFR2   | 0.02  |
| hsa-mir-183 | NPM3     | 0.11  |
| hsa-mir-183 | NPW      | 0.08  |
| hsa-mir-183 | NR0B1    | -0.04 |
| hsa-mir-183 | NR0B2    | 0.09  |
| hsa-mir-183 | NRG4     | 0.08  |
| hsa-mir-183 | NRTN     | 0.06  |
| hsa-mir-183 | NTF3     | 0.07  |
| hsa-mir-183 | NTRK2    | -0.2  |
| hsa-mir-183 | NTS      | 0.04  |
| hsa-mir-183 | NUP210L  | 0.11  |
| hsa-mir-183 | ODAM     | 0.1   |
| hsa-mir-183 | OLR1     | -0.21 |
| hsa-mir-183 | OR1D2    | 0.14  |
| hsa-mir-183 | OR2T2    | -0.25 |
| hsa-mir-183 | OR51B5   | 0.14  |
| hsa-mir-183 | OR51I1   | 0.04  |
| hsa-mir-183 | ORM1     | 0.02  |
| hsa-mir-183 | OSTalpha | 0.07  |
| hsa-mir-183 | OTX2     | 0.17  |
| hsa-mir-183 | PAEP     | 0.03  |
| hsa-mir-183 | PAGE1    | 0.14  |
| hsa-mir-183 | PAGE2    | 0.1   |
| hsa-mir-183 | PASD1    | 0.15  |
| hsa-mir-183 | PCSK9    | 0.11  |
| hsa-mir-183 | PDILT    | 0.12  |
| hsa-mir-183 | PIAS4    | 0.21  |
| hsa-mir-183 | PIR      | -0.18 |
| hsa-mir-183 | PITX1    | 0.03  |
| hsa-mir-183 | PIWIL2   | 0.15  |
| hsa-mir-183 | PKD2     | -0.09 |
| hsa-mir-183 | PKLR     | 0.08  |
| hsa-mir-183 | PLA2G3   | -0.01 |
| hsa-mir-183 | PLXDC2   | -0.33 |
| hsa-mir-183 | PNLIPRP2 | 0.14  |
| hsa-mir-183 | POTE15   | 0.15  |
| hsa-mir-183 | POU5F1P3 | 0.11  |
| hsa-mir-183 | PPP1CA   | 0.21  |
| hsa-mir-183 | PRAMEF8  | 0.08  |
| hsa-mir-183 | PRAP1    | 0.09  |
| hsa-mir-183 | PRDM13   | 0.17  |
| hsa-mir-183 | PRDM7    | 0.11  |
| hsa-mir-183 | PRDM9    | 0.19  |
| hsa-mir-183 | PRG2     | 0.1   |
| hsa-mir-183 | PRMT1    | 0.37  |
| hsa-mir-183 | PROC     | 0.09  |
| hsa-mir-183 | PRODH2   | 0.11  |
| hsa-mir-183 | PRSS1    | 0.1   |
| hsa-mir-183 | PRSS2    | 0.08  |
| hsa-mir-183 | PRSS21   | 0.06  |
| hsa-mir-183 | PRSS3    | 0.04  |

|             |             |       |
|-------------|-------------|-------|
| hsa-mir-183 | PRSS7       | 0.06  |
| hsa-mir-183 | PSG6        | 0.18  |
| hsa-mir-183 | PTGFR       | 0.03  |
| hsa-mir-183 | PTPN11      | -0.12 |
| hsa-mir-183 | QTRT1       | 0.3   |
| hsa-mir-183 | RAB25       | 0.06  |
| hsa-mir-183 | RASGRP3     | -0.13 |
| hsa-mir-183 | RBM35B      | 0.08  |
| hsa-mir-183 | RGPD4       | -0.25 |
| hsa-mir-183 | RHAG        | 0.09  |
| hsa-mir-183 | RHEBL1      | 0.08  |
| hsa-mir-183 | RHOV        | 0.09  |
| hsa-mir-183 | RNF212      | 0.09  |
| hsa-mir-183 | RP13-36C9.6 | 0.06  |
| hsa-mir-183 | RPS14       | 0.05  |
| hsa-mir-183 | RTDR1       | -0.29 |
| hsa-mir-183 | S100A14     | 0.05  |
| hsa-mir-183 | SAGE1       | 0.06  |
| hsa-mir-183 | SC65        | 0.27  |
| hsa-mir-183 | SEMA3E      | -0.18 |
| hsa-mir-183 | SERPINA11   | 0.12  |
| hsa-mir-183 | SERPINA4    | 0.11  |
| hsa-mir-183 | SERPINA6    | 0.09  |
| hsa-mir-183 | SERPINA7    | 0.08  |
| hsa-mir-183 | SERPINB2    | 0.08  |
| hsa-mir-183 | SERPINB3    | 0.12  |
| hsa-mir-183 | SERPINB4    | 0.11  |
| hsa-mir-183 | SH2D3A      | 0.04  |
| hsa-mir-183 | SKP2        | 0.18  |
| hsa-mir-183 | SLC12A3     | 0.11  |
| hsa-mir-183 | SLC17A2     | 0.13  |
| hsa-mir-183 | SLC23A1     | 0.13  |
| hsa-mir-183 | SLC2A2      | 0.11  |
| hsa-mir-183 | SLC39A5     | 0.08  |
| hsa-mir-183 | SLC44A4     | 0.12  |
| hsa-mir-183 | SLC45A2     | 0.16  |
| hsa-mir-183 | SLC6A4      | 0.12  |
| hsa-mir-183 | SLCO1B3     | 0.01  |
| hsa-mir-183 | SLCO6A1     | 0.37  |
| hsa-mir-183 | SMCR5       | 0.13  |
| hsa-mir-183 | SMPDL3B     | 0.09  |
| hsa-mir-183 | SPANXC      | 0.04  |
| hsa-mir-183 | SPANXD      | 0.03  |
| hsa-mir-183 | SPINK5      | 0.15  |
| hsa-mir-183 | SPRR1B      | 0.12  |
| hsa-mir-183 | SPRR2D      | 0.1   |
| hsa-mir-183 | SPRR3       | 0.08  |
| hsa-mir-183 | SRM         | 0.26  |
| hsa-mir-183 | SSX1        | 0.2   |
| hsa-mir-183 | SSX7        | 0.16  |
| hsa-mir-183 | STOML2      | 0.13  |
| hsa-mir-183 | SUHW1       | 0.13  |
| hsa-mir-183 | SULT1C4     | -0.23 |

|             |           |       |
|-------------|-----------|-------|
| hsa-mir-183 | SULT2A1   | 0.12  |
| hsa-mir-183 | TBX10     | 0.11  |
| hsa-mir-183 | TDGF1     | 0.07  |
| hsa-mir-183 | TERT      | 0.12  |
| hsa-mir-183 | TEX264    | 0.02  |
| hsa-mir-183 | TIMM44    | 0.32  |
| hsa-mir-183 | TJP3      | 0.08  |
| hsa-mir-183 | TLR10     | -0.01 |
| hsa-mir-183 | TLR5      | -0.33 |
| hsa-mir-183 | TM4SF5    | 0.11  |
| hsa-mir-183 | TMEM16J   | 0.1   |
| hsa-mir-183 | TMEM83    | 0.07  |
| hsa-mir-183 | TMEM92    | 0     |
| hsa-mir-183 | TMPRSS11F | 0.15  |
| hsa-mir-183 | TMPRSS4   | 0.11  |
| hsa-mir-183 | TNFRSF18  | 0.04  |
| hsa-mir-183 | TRIM15    | 0.12  |
| hsa-mir-183 | TRIM49    | 0.23  |
| hsa-mir-183 | TRIM7     | 0.14  |
| hsa-mir-183 | TRPM1     | 0.16  |
| hsa-mir-183 | TSGA10    | -0.23 |
| hsa-mir-183 | TSPY2     | 0.13  |
| hsa-mir-183 | TTR       | 0.04  |
| hsa-mir-183 | TUBAL3    | 0.08  |
| hsa-mir-183 | TYR       | 0.08  |
| hsa-mir-183 | UGT2B10   | 0.09  |
| hsa-mir-183 | UGT2B11   | 0.11  |
| hsa-mir-183 | UGT2B28   | 0.13  |
| hsa-mir-183 | UGT2B4    | 0.11  |
| hsa-mir-183 | UNC93A    | 0.13  |
| hsa-mir-183 | UTS2      | 0     |
| hsa-mir-183 | VIL1      | 0.13  |
| hsa-mir-183 | WASL      | -0.16 |
| hsa-mir-183 | ZG16      | 0.06  |
| hsa-mir-183 | ZNF264    | 0.08  |
| hsa-mir-183 | ZNF366    | -0.11 |
| hsa-mir-183 | ZNF683    | -0.23 |
| hsa-mir-185 | AOAH      | 0.23  |
| hsa-mir-185 | CCL5      | 0.27  |
| hsa-mir-185 | CDC42EP2  | 0.41  |
| hsa-mir-185 | FLJ22795  | -0.3  |
| hsa-mir-185 | GUSBL1    | -0.22 |
| hsa-mir-185 | HCRP1     | -0.15 |
| hsa-mir-185 | IL6       | 0.25  |
| hsa-mir-185 | MYLK      | 0.38  |
| hsa-mir-185 | OSTF1     | 0.46  |
| hsa-mir-185 | SKAP2     | 0.28  |
| hsa-mir-185 | SNX10     | 0.32  |
| hsa-mir-185 | TMPRSS5   | -0.18 |
| hsa-mir-185 | TRPV2     | 0.39  |
| hsa-mir-186 | C18orf34  | 0.44  |
| hsa-mir-186 | DR1       | 0.26  |
| hsa-mir-186 | HIST1H2AK | 0.27  |



|             |           |       |
|-------------|-----------|-------|
| hsa-mir-186 | KIAA1586  | 0.17  |
| hsa-mir-186 | LOC388524 | -0.01 |
| hsa-mir-186 | LOC63920  | 0.25  |
| hsa-mir-186 | PAEP      | -0.12 |
| hsa-mir-186 | PTGFR     | -0.21 |
| hsa-mir-186 | SEC14L4   | -0.34 |
| hsa-mir-186 | ST3GAL1   | -0.35 |
| hsa-mir-186 | STARD6    | 0.34  |
| hsa-mir-186 | TP53TG3   | -0.2  |
| hsa-mir-186 | TRDMT1    | 0.36  |
| hsa-mir-186 | YIPF7     | 0.39  |
| hsa-mir-188 | C9orf47   | 0.49  |
| hsa-mir-188 | CD86      | 0.44  |
| hsa-mir-188 | CGB1      | 0.38  |
| hsa-mir-188 | COL1A1    | 0.3   |
| hsa-mir-188 | CXorf6    | -0.19 |
| hsa-mir-188 | CYCS      | -0.08 |
| hsa-mir-188 | EDN3      | -0.17 |
| hsa-mir-188 | FLJ38723  | 0.39  |
| hsa-mir-188 | IL1F10    | 0.44  |
| hsa-mir-188 | IL7R      | 0.27  |
| hsa-mir-188 | LOX       | 0.2   |
| hsa-mir-188 | MMP1      | 0.21  |
| hsa-mir-188 | MYBPH     | 0.11  |
| hsa-mir-188 | NUDT11    | -0.27 |
| hsa-mir-188 | OLIG2     | -0.2  |
| hsa-mir-188 | PCSK4     | 0.39  |
| hsa-mir-188 | POSTN     | 0.18  |
| hsa-mir-188 | PRR6      | -0.1  |
| hsa-mir-188 | RPA4      | 0.41  |
| hsa-mir-188 | SAPS1     | 0.47  |
| hsa-mir-188 | SIM2      | -0.19 |
| hsa-mir-188 | VPS18     | 0.45  |
| hsa-mir-18a | ACAN      | 0.29  |
| hsa-mir-18a | AOF2      | 0.47  |
| hsa-mir-18a | BHLHB3    | -0.41 |
| hsa-mir-18a | BIRC5     | 0.45  |
| hsa-mir-18a | BLVRB     | -0.45 |
| hsa-mir-18a | BUB1      | 0.45  |
| hsa-mir-18a | BUB1B     | 0.49  |
| hsa-mir-18a | C11orf82  | 0.48  |
| hsa-mir-18a | C12orf48  | 0.46  |
| hsa-mir-18a | C13orf3   | 0.49  |
| hsa-mir-18a | C15orf42  | 0.49  |
| hsa-mir-18a | C18orf54  | 0.52  |
| hsa-mir-18a | C5orf34   | 0.42  |
| hsa-mir-18a | C6orf173  | 0.45  |
| hsa-mir-18a | C6orf192  | -0.33 |
| hsa-mir-18a | CADPS2    | -0.4  |
| hsa-mir-18a | CCNA2     | 0.46  |
| hsa-mir-18a | CCNB1     | 0.45  |
| hsa-mir-18a | CCNB2     | 0.5   |
| hsa-mir-18a | CCNE2     | 0.47  |

|             |             |       |
|-------------|-------------|-------|
| hsa-mir-18a | CDC2        | 0.45  |
| hsa-mir-18a | CDC20       | 0.45  |
| hsa-mir-18a | CDC45L      | 0.5   |
| hsa-mir-18a | CDC6        | 0.49  |
| hsa-mir-18a | CDCA2       | 0.44  |
| hsa-mir-18a | CDCA4       | 0.45  |
| hsa-mir-18a | CDCA5       | 0.43  |
| hsa-mir-18a | CDCA8       | 0.48  |
| hsa-mir-18a | CDKN3       | 0.42  |
| hsa-mir-18a | CENPE       | 0.47  |
| hsa-mir-18a | CENPF       | 0.45  |
| hsa-mir-18a | CENPJ       | 0.48  |
| hsa-mir-18a | CHPT1       | -0.35 |
| hsa-mir-18a | CKAP2       | 0.49  |
| hsa-mir-18a | CLU         | -0.44 |
| hsa-mir-18a | CPT1A       | -0.15 |
| hsa-mir-18a | DEF6        | -0.26 |
| hsa-mir-18a | DEPDC1      | 0.41  |
| hsa-mir-18a | DEPDC1B     | 0.52  |
| hsa-mir-18a | DHX58       | -0.45 |
| hsa-mir-18a | KFZp762E131 | 0.45  |
| hsa-mir-18a | DLG7        | 0.52  |
| hsa-mir-18a | DNA2L       | 0.48  |
| hsa-mir-18a | DSEL        | 0.43  |
| hsa-mir-18a | EAF2        | -0.34 |
| hsa-mir-18a | ECT2        | 0.49  |
| hsa-mir-18a | EPHX2       | -0.4  |
| hsa-mir-18a | ESCO2       | 0.49  |
| hsa-mir-18a | EXO1        | 0.49  |
| hsa-mir-18a | FAM54A      | 0.5   |
| hsa-mir-18a | FAM64A      | 0.49  |
| hsa-mir-18a | FAM83D      | 0.46  |
| hsa-mir-18a | FANCI       | 0.47  |
| hsa-mir-18a | FBXO5       | 0.51  |
| hsa-mir-18a | GJA1        | -0.33 |
| hsa-mir-18a | GSG2        | 0.45  |
| hsa-mir-18a | HDAC2       | 0.51  |
| hsa-mir-18a | HMG4L       | 0.4   |
| hsa-mir-18a | HMGB2       | 0.44  |
| hsa-mir-18a | HN1         | 0.47  |
| hsa-mir-18a | HOXD3       | 0.43  |
| hsa-mir-18a | HRASLS3     | -0.45 |
| hsa-mir-18a | KIF14       | 0.45  |
| hsa-mir-18a | KIF2C       | 0.48  |
| hsa-mir-18a | KIF4A       | 0.43  |
| hsa-mir-18a | KIFC1       | 0.48  |
| hsa-mir-18a | LDHD        | -0.43 |
| hsa-mir-18a | LGI1        | -0.4  |
| hsa-mir-18a | LMO3        | -0.34 |
| hsa-mir-18a | MAD2L1      | 0.49  |
| hsa-mir-18a | MARCKSL1    | 0.37  |
| hsa-mir-18a | MATN4       | 0.4   |
| hsa-mir-18a | MCM10       | 0.48  |

|              |          |       |
|--------------|----------|-------|
| hsa-mir-18a  | METTL7A  | -0.43 |
| hsa-mir-18a  | MEX3B    | 0.46  |
| hsa-mir-18a  | MGC7036  | -0.45 |
| hsa-mir-18a  | MKI67    | 0.42  |
| hsa-mir-18a  | MOSC2    | -0.34 |
| hsa-mir-18a  | MT1E     | -0.49 |
| hsa-mir-18a  | MT1M     | -0.48 |
| hsa-mir-18a  | MT3      | -0.36 |
| hsa-mir-18a  | MYB      | 0.41  |
| hsa-mir-18a  | MYBL2    | 0.48  |
| hsa-mir-18a  | NDC80    | 0.48  |
| hsa-mir-18a  | NEIL3    | 0.51  |
| hsa-mir-18a  | NEK2     | 0.45  |
| hsa-mir-18a  | NT5DC2   | 0.4   |
| hsa-mir-18a  | NUF2     | 0.5   |
| hsa-mir-18a  | OPLAH    | -0.43 |
| hsa-mir-18a  | OSBPL6   | -0.32 |
| hsa-mir-18a  | OVOS2    | 0.35  |
| hsa-mir-18a  | PAFAH1B3 | 0.43  |
| hsa-mir-18a  | PBK      | 0.44  |
| hsa-mir-18a  | PLEKHK1  | 0.5   |
| hsa-mir-18a  | PLK4     | 0.48  |
| hsa-mir-18a  | POLG     | 0.48  |
| hsa-mir-18a  | RBKS     | -0.38 |
| hsa-mir-18a  | RFC3     | 0.46  |
| hsa-mir-18a  | RNASEH2A | 0.48  |
| hsa-mir-18a  | RRM2     | 0.48  |
| hsa-mir-18a  | SLC13A3  | -0.36 |
| hsa-mir-18a  | SLC1A2   | -0.37 |
| hsa-mir-18a  | SLC4A4   | -0.31 |
| hsa-mir-18a  | SMARCB1  | 0.32  |
| hsa-mir-18a  | SORL1    | -0.4  |
| hsa-mir-18a  | SPAG5    | 0.45  |
| hsa-mir-18a  | SPC25    | 0.46  |
| hsa-mir-18a  | SSPN     | -0.4  |
| hsa-mir-18a  | TMPO     | 0.54  |
| hsa-mir-18a  | TMSL8    | 0.36  |
| hsa-mir-18a  | TOP2A    | 0.51  |
| hsa-mir-18a  | TPX2     | 0.48  |
| hsa-mir-18a  | TRIM6    | -0.29 |
| hsa-mir-18a  | TRIP13   | 0.4   |
| hsa-mir-18a  | TTK      | 0.52  |
| hsa-mir-18a  | TUBB     | 0.37  |
| hsa-mir-18a  | UBE2C    | 0.51  |
| hsa-mir-18a  | UBE2S    | 0.44  |
| hsa-mir-18a  | UBE2T    | 0.42  |
| hsa-mir-18a  | USP53    | -0.35 |
| hsa-mir-18a  | XAF1     | -0.31 |
| hsa-mir-18a  | ZIC2     | -0.29 |
| hsa-mir-18a  | ZNF286A  | 0.42  |
| hsa-mir-18a  | ZNF300   | 0.52  |
| hsa-mir-18a* | ATP13A5  | 0.13  |
| hsa-mir-18a* | CYLC1    | 0.23  |

|              |          |       |
|--------------|----------|-------|
| hsa-mir-18a* | FRMD4B   | -0.14 |
| hsa-mir-18a* | RAB21    | -0.16 |
| hsa-mir-18a* | WFDC2    | -0.09 |
| hsa-mir-191  | ANKFN1   | 0.2   |
| hsa-mir-191  | ATP8A2   | -0.07 |
| hsa-mir-191  | C10orf65 | 0.28  |
| hsa-mir-191  | C12orf28 | -0.05 |
| hsa-mir-191  | DNAH7    | 0.3   |
| hsa-mir-191  | FAM83B   | -0.19 |
| hsa-mir-191  | HOXB8    | -0.12 |
| hsa-mir-191  | MUM1L1   | -0.04 |
| hsa-mir-191  | PARP3    | 0.39  |
| hsa-mir-191  | PAX9     | -0.19 |
| hsa-mir-191  | PNPLA4   | 0.25  |
| hsa-mir-191  | RPL39L   | -0.04 |
| hsa-mir-191  | SIAE     | 0.2   |
| hsa-mir-192  | C1orf88  | 0.11  |
| hsa-mir-192  | C20orf74 | -0.04 |
| hsa-mir-192  | CHST9    | 0.22  |
| hsa-mir-192  | GABRG3   | -0.17 |
| hsa-mir-192  | JMJD2A   | 0.07  |
| hsa-mir-192  | KCNG1    | 0     |
| hsa-mir-192  | PDK4     | -0.17 |
| hsa-mir-192  | PITX2    | -0.04 |
| hsa-mir-192  | PLCD1    | 0.17  |
| hsa-mir-192  | RANBP17  | -0.03 |
| hsa-mir-192  | SSPO     | 0.11  |
| hsa-mir-192  | XRCC6BP1 | -0.01 |
| hsa-mir-193a | ABCA13   | 0.48  |
| hsa-mir-193a | ABCC3    | 0.47  |
| hsa-mir-193a | AGBL2    | 0.4   |
| hsa-mir-193a | AGTR1    | 0.29  |
| hsa-mir-193a | ALPK1    | 0.51  |
| hsa-mir-193a | ANXA1    | 0.42  |
| hsa-mir-193a | ANXA13   | 0.51  |
| hsa-mir-193a | APOB48R  | 0.45  |
| hsa-mir-193a | APOBEC3F | 0.47  |
| hsa-mir-193a | ARSK     | 0.37  |
| hsa-mir-193a | ARTS-1   | 0.4   |
| hsa-mir-193a | B3GNT5   | 0.33  |
| hsa-mir-193a | BCMO1    | 0.39  |
| hsa-mir-193a | C10orf79 | 0.37  |
| hsa-mir-193a | C11orf63 | 0.43  |
| hsa-mir-193a | C16orf73 | -0.48 |
| hsa-mir-193a | C1RL     | 0.48  |
| hsa-mir-193a | C5AR1    | 0.5   |
| hsa-mir-193a | C5orf29  | 0.49  |
| hsa-mir-193a | CAST     | 0.54  |
| hsa-mir-193a | CBLN1    | -0.48 |
| hsa-mir-193a | CCDC46   | 0.44  |
| hsa-mir-193a | CCR5     | 0.55  |
| hsa-mir-193a | CD109    | 0.47  |
| hsa-mir-193a | CD14     | 0.39  |

|              |           |       |
|--------------|-----------|-------|
| hsa-mir-193a | CD163     | 0.46  |
| hsa-mir-193a | CD72      | 0.5   |
| hsa-mir-193a | CD93      | 0.45  |
| hsa-mir-193a | CDH16     | -0.47 |
| hsa-mir-193a | CEBPD     | 0.45  |
| hsa-mir-193a | CEBPE     | 0.54  |
| hsa-mir-193a | CLEC5A    | 0.48  |
| hsa-mir-193a | COL1A1    | 0.36  |
| hsa-mir-193a | COL8A1    | 0.44  |
| hsa-mir-193a | COL8A2    | 0.49  |
| hsa-mir-193a | CREB3L3   | -0.47 |
| hsa-mir-193a | CSTA      | 0.56  |
| hsa-mir-193a | DPYD      | 0.49  |
| hsa-mir-193a | DRAM      | 0.51  |
| hsa-mir-193a | EFEMP1    | 0.46  |
| hsa-mir-193a | EGFLAM    | 0.49  |
| hsa-mir-193a | FAM82A    | 0.28  |
| hsa-mir-193a | FCGR2B    | 0.48  |
| hsa-mir-193a | FER1L3    | 0.52  |
| hsa-mir-193a | FLJ20035  | 0.41  |
| hsa-mir-193a | FLJ22662  | 0.5   |
| hsa-mir-193a | FLJ34047  | -0.51 |
| hsa-mir-193a | FLJ40298  | 0.45  |
| hsa-mir-193a | FMO4      | 0.58  |
| hsa-mir-193a | GBP5      | 0.52  |
| hsa-mir-193a | GPR18     | 0.44  |
| hsa-mir-193a | GPR84     | 0.52  |
| hsa-mir-193a | GPT       | -0.23 |
| hsa-mir-193a | HHAT      | 0.35  |
| hsa-mir-193a | HSPB1     | 0.41  |
| hsa-mir-193a | IDI1      | -0.42 |
| hsa-mir-193a | IL13RA2   | 0.26  |
| hsa-mir-193a | IL15      | 0.39  |
| hsa-mir-193a | IL2RA     | 0.49  |
| hsa-mir-193a | IL6       | 0.33  |
| hsa-mir-193a | IL7       | 0.45  |
| hsa-mir-193a | KLRB1     | 0.51  |
| hsa-mir-193a | LAMA2     | 0.47  |
| hsa-mir-193a | LAMP3     | 0.4   |
| hsa-mir-193a | LILRB2    | 0.49  |
| hsa-mir-193a | LINCR     | 0.37  |
| hsa-mir-193a | LOC388335 | 0.45  |
| hsa-mir-193a | LOC441054 | 0.46  |
| hsa-mir-193a | LOC644186 | 0.36  |
| hsa-mir-193a | LOX       | 0.39  |
| hsa-mir-193a | LRRC25    | 0.53  |
| hsa-mir-193a | LRRC6     | 0.42  |
| hsa-mir-193a | LTBP1     | 0.42  |
| hsa-mir-193a | MAGEA8    | -0.41 |
| hsa-mir-193a | MAGEC2    | -0.3  |
| hsa-mir-193a | MARCO     | 0.49  |
| hsa-mir-193a | MDFIC     | 0.53  |
| hsa-mir-193a | MGC24103  | 0.38  |

|              |            |       |
|--------------|------------|-------|
| hsa-mir-193a | MICALCL    | 0.42  |
| hsa-mir-193a | MMAA       | 0.53  |
| hsa-mir-193a | MMP12      | 0.02  |
| hsa-mir-193a | MSN        | 0.5   |
| hsa-mir-193a | MSR1       | 0.45  |
| hsa-mir-193a | MYCBPAP    | 0.48  |
| hsa-mir-193a | NNMT       | 0.43  |
| hsa-mir-193a | NOD1       | 0.43  |
| hsa-mir-193a | NOD2       | 0.56  |
| hsa-mir-193a | NT5C3L     | -0.36 |
| hsa-mir-193a | OSM        | 0.44  |
| hsa-mir-193a | PLAU       | 0.32  |
| hsa-mir-193a | PLB1       | 0.48  |
| hsa-mir-193a | POU5F1P4   | -0.38 |
| hsa-mir-193a | PPIC       | 0.5   |
| hsa-mir-193a | PTGFR      | -0.16 |
| hsa-mir-193a | RDH10      | 0.37  |
| hsa-mir-193a | S100A2     | 0.5   |
| hsa-mir-193a | SAMD9      | 0.48  |
| hsa-mir-193a | SCARA3     | 0.28  |
| hsa-mir-193a | SLAMF8     | 0.59  |
| hsa-mir-193a | SLC25A43   | 0.49  |
| hsa-mir-193a | SLC41A2    | 0.5   |
| hsa-mir-193a | SLC45A2    | -0.5  |
| hsa-mir-193a | SLC47A2    | 0.37  |
| hsa-mir-193a | SLFN13     | 0.35  |
| hsa-mir-193a | SLFN5      | 0.42  |
| hsa-mir-193a | SOCS3      | 0.42  |
| hsa-mir-193a | SPATA17    | 0.4   |
| hsa-mir-193a | STAB1      | 0.51  |
| hsa-mir-193a | STEAP3     | 0.47  |
| hsa-mir-193a | tcag7.1314 | 0.42  |
| hsa-mir-193a | TCEA3      | 0.45  |
| hsa-mir-193a | TGFBI      | 0.48  |
| hsa-mir-193a | TMEM121    | -0.45 |
| hsa-mir-193a | TMEM154    | 0.43  |
| hsa-mir-193a | TREM1      | 0.46  |
| hsa-mir-193a | VDR        | 0.51  |
| hsa-mir-193a | WDR63      | 0.51  |
| hsa-mir-193a | WDR78      | 0.46  |
| hsa-mir-193a | WIPF1      | 0.47  |
| hsa-mir-193b | ADAMTS19   | -0.21 |
| hsa-mir-193b | ARSK       | 0.34  |
| hsa-mir-193b | CAMP       | 0.29  |
| hsa-mir-193b | CDH9       | -0.3  |
| hsa-mir-193b | CST6       | 0.1   |
| hsa-mir-193b | DOK6       | -0.29 |
| hsa-mir-193b | HMGCLL1    | -0.25 |
| hsa-mir-193b | IL6        | 0.22  |
| hsa-mir-193b | MAGEC2     | -0.16 |
| hsa-mir-193b | NEBL       | 0.18  |
| hsa-mir-193b | NXPH1      | -0.22 |
| hsa-mir-193b | PCSK2      | -0.18 |

|              |           |       |
|--------------|-----------|-------|
| hsa-mir-193b | RUNDC3B   | -0.07 |
| hsa-mir-193b | SH3GL3    | -0.29 |
| hsa-mir-193b | SLC18A1   | -0.3  |
| hsa-mir-193b | SLC35F3   | -0.27 |
| hsa-mir-193b | STXBP5L   | 0.01  |
| hsa-mir-193b | SYT13     | -0.26 |
| hsa-mir-193b | TMEM130   | -0.23 |
| hsa-mir-194  | APOF      | -0.26 |
| hsa-mir-194  | C10orf63  | 0.3   |
| hsa-mir-194  | C15orf26  | -0.04 |
| hsa-mir-194  | C18orf2   | -0.32 |
| hsa-mir-194  | C4BPA     | -0.13 |
| hsa-mir-194  | CALML3    | -0.32 |
| hsa-mir-194  | CAPN6     | -0.25 |
| hsa-mir-194  | CLCA2     | -0.39 |
| hsa-mir-194  | CREB3L3   | -0.32 |
| hsa-mir-194  | DAZL      | -0.01 |
| hsa-mir-194  | FAM9B     | -0.33 |
| hsa-mir-194  | GDF9      | 0.42  |
| hsa-mir-194  | HAND1     | -0.4  |
| hsa-mir-194  | KIAA1383  | 0.34  |
| hsa-mir-194  | MAGEC2    | -0.16 |
| hsa-mir-194  | MME       | -0.2  |
| hsa-mir-194  | MS4A3     | -0.33 |
| hsa-mir-194  | MSX2      | -0.22 |
| hsa-mir-194  | MUC15     | -0.19 |
| hsa-mir-194  | MYLC2PL   | -0.35 |
| hsa-mir-194  | NRG4      | -0.36 |
| hsa-mir-194  | PNLIPRP2  | -0.25 |
| hsa-mir-194  | PTGFR     | -0.34 |
| hsa-mir-194  | RAD9B     | 0.35  |
| hsa-mir-194  | RFTN2     | 0.28  |
| hsa-mir-194  | SERPINA10 | -0.27 |
| hsa-mir-194  | SERPINB3  | -0.32 |
| hsa-mir-194  | SERPINB4  | -0.32 |
| hsa-mir-194  | SLC17A2   | -0.35 |
| hsa-mir-194  | SLC6A4    | -0.37 |
| hsa-mir-194  | SPINK5    | -0.28 |
| hsa-mir-194  | SULT2A1   | -0.32 |
| hsa-mir-194  | TP53TG3   | -0.22 |
| hsa-mir-194  | TSPY2     | -0.3  |
| hsa-mir-194  | XPOT      | 0.35  |
| hsa-mir-194  | YIPF7     | 0.34  |
| hsa-mir-194  | ZFP42     | -0.34 |
| hsa-mir-194  | ZNF396    | 0.41  |
| hsa-mir-195  | ALDH1A3   | -0.35 |
| hsa-mir-195  | ANKFN1    | 0.4   |
| hsa-mir-195  | ANXA3     | -0.26 |
| hsa-mir-195  | ASPHD1    | -0.15 |
| hsa-mir-195  | BEST3     | 0.27  |
| hsa-mir-195  | BOC       | 0.31  |
| hsa-mir-195  | BSN       | -0.03 |
| hsa-mir-195  | BTC       | -0.25 |

|             |          |       |
|-------------|----------|-------|
| hsa-mir-195 | C11orf9  | -0.32 |
| hsa-mir-195 | C22orf23 | 0.35  |
| hsa-mir-195 | C4orf32  | -0.34 |
| hsa-mir-195 | C5orf23  | -0.27 |
| hsa-mir-195 | C9orf3   | -0.31 |
| hsa-mir-195 | CCK      | -0.14 |
| hsa-mir-195 | CDC42EP2 | -0.32 |
| hsa-mir-195 | CDH18    | -0.16 |
| hsa-mir-195 | CEP55    | -0.06 |
| hsa-mir-195 | CHST9    | 0.39  |
| hsa-mir-195 | COL11A1  | -0.31 |
| hsa-mir-195 | EDIL3    | -0.39 |
| hsa-mir-195 | EGFR     | 0.4   |
| hsa-mir-195 | EPB41L3  | -0.33 |
| hsa-mir-195 | FA2H     | -0.28 |
| hsa-mir-195 | FHL2     | -0.39 |
| hsa-mir-195 | FIGN     | 0.28  |
| hsa-mir-195 | GALNTL5  | -0.17 |
| hsa-mir-195 | GLI2     | 0.33  |
| hsa-mir-195 | HHIP     | -0.29 |
| hsa-mir-195 | HS3ST5   | -0.31 |
| hsa-mir-195 | INPP5F   | -0.37 |
| hsa-mir-195 | KCNK1    | -0.27 |
| hsa-mir-195 | KIAA1598 | -0.37 |
| hsa-mir-195 | LFNG     | 0.38  |
| hsa-mir-195 | LRRC48   | 0.4   |
| hsa-mir-195 | MAT2A    | 0.3   |
| hsa-mir-195 | MMD      | -0.43 |
| hsa-mir-195 | NAPSA    | 0.06  |
| hsa-mir-195 | NEFL     | -0.27 |
| hsa-mir-195 | NFIX     | 0.35  |
| hsa-mir-195 | NGEF     | -0.25 |
| hsa-mir-195 | NKX6-2   | -0.27 |
| hsa-mir-195 | NOS1AP   | 0     |
| hsa-mir-195 | NR0B1    | -0.31 |
| hsa-mir-195 | NRXN1    | 0.14  |
| hsa-mir-195 | ODZ2     | -0.27 |
| hsa-mir-195 | PCDHB5   | 0.05  |
| hsa-mir-195 | PLEKHH3  | 0.45  |
| hsa-mir-195 | PNMA2    | 0.11  |
| hsa-mir-195 | POPDC3   | -0.45 |
| hsa-mir-195 | RASA4    | 0.29  |
| hsa-mir-195 | REPS2    | -0.38 |
| hsa-mir-195 | RFX2     | 0.41  |
| hsa-mir-195 | RNF128   | -0.32 |
| hsa-mir-195 | SEMA3A   | -0.3  |
| hsa-mir-195 | SFRP2    | -0.32 |
| hsa-mir-195 | SNCAIP   | 0.37  |
| hsa-mir-195 | STXBP6   | -0.33 |
| hsa-mir-195 | SUMF2    | 0.37  |
| hsa-mir-195 | TMEFF2   | -0.34 |
| hsa-mir-195 | TMEM16D  | -0.36 |
| hsa-mir-195 | TMOD4    | 0.34  |



|              |          |       |
|--------------|----------|-------|
| hsa-mir-195  | TMTC1    | -0.34 |
| hsa-mir-195  | ZNF540   | 0.02  |
| hsa-mir-195  | ZNF618   | -0.3  |
| hsa-mir-196a | ASB5     | 0.21  |
| hsa-mir-196a | ELSPBP1  | 0.11  |
| hsa-mir-196a | EN1      | 0.3   |
| hsa-mir-196a | GJB2     | 0.13  |
| hsa-mir-196a | HOTAIR   | 0.53  |
| hsa-mir-196a | HOXA10   | 0.31  |
| hsa-mir-196a | HOXA13   | 0.24  |
| hsa-mir-196a | HOXA2    | 0.33  |
| hsa-mir-196a | HOXA3    | 0.32  |
| hsa-mir-196a | HOXA4    | 0.29  |
| hsa-mir-196a | HOXA5    | 0.37  |
| hsa-mir-196a | HOXA7    | 0.33  |
| hsa-mir-196a | HOXA9    | 0.32  |
| hsa-mir-196a | HOXC10   | 0.65  |
| hsa-mir-196a | HOXC13   | 0.56  |
| hsa-mir-196a | HOXC8    | 0.58  |
| hsa-mir-196a | HOXC9    | 0.58  |
| hsa-mir-196a | HOXD10   | 0.33  |
| hsa-mir-196a | KRT222P  | -0.07 |
| hsa-mir-196a | LCN6     | 0.1   |
| hsa-mir-196a | POSTN    | 0.1   |
| hsa-mir-196a | PRDM13   | 0.2   |
| hsa-mir-196a | SEMA3A   | -0.11 |
| hsa-mir-196a | TXLNB    | 0.19  |
| hsa-mir-196a | WNT16    | 0.15  |
| hsa-mir-196b | ABCC2    | -0.39 |
| hsa-mir-196b | ABCG5    | -0.48 |
| hsa-mir-196b | ACF      | -0.45 |
| hsa-mir-196b | ACSM2B   | -0.46 |
| hsa-mir-196b | ACSM3    | -0.43 |
| hsa-mir-196b | ACTL8    | -0.48 |
| hsa-mir-196b | ADH4     | -0.44 |
| hsa-mir-196b | AGR2     | -0.4  |
| hsa-mir-196b | AKR1C3   | -0.33 |
| hsa-mir-196b | AKR1CL2  | -0.47 |
| hsa-mir-196b | ALB      | -0.44 |
| hsa-mir-196b | ALS2CR12 | 0.44  |
| hsa-mir-196b | AMHR2    | -0.47 |
| hsa-mir-196b | AMTN     | -0.48 |
| hsa-mir-196b | APOA2    | -0.42 |
| hsa-mir-196b | APOA5    | -0.47 |
| hsa-mir-196b | APOF     | -0.44 |
| hsa-mir-196b | AQP3     | -0.42 |
| hsa-mir-196b | ARHGEF16 | -0.18 |
| hsa-mir-196b | ART4     | -0.48 |
| hsa-mir-196b | ATAD4    | -0.45 |
| hsa-mir-196b | BAAT     | -0.49 |
| hsa-mir-196b | BAIAP2L1 | -0.42 |
| hsa-mir-196b | BMP5     | -0.3  |
| hsa-mir-196b | BMPR1B   | 0.32  |

|              |           |       |
|--------------|-----------|-------|
| hsa-mir-196b | C10orf82  | -0.44 |
| hsa-mir-196b | C12orf56  | -0.35 |
| hsa-mir-196b | C14orf115 | -0.45 |
| hsa-mir-196b | C15orf26  | 0.04  |
| hsa-mir-196b | C16orf73  | -0.43 |
| hsa-mir-196b | C18orf2   | -0.47 |
| hsa-mir-196b | C19orf21  | -0.45 |
| hsa-mir-196b | C1orf172  | -0.4  |
| hsa-mir-196b | C1orf67   | -0.27 |
| hsa-mir-196b | C20orf26  | 0.47  |
| hsa-mir-196b | C21orf125 | -0.45 |
| hsa-mir-196b | C21orf62  | 0.4   |
| hsa-mir-196b | C6orf156  | -0.31 |
| hsa-mir-196b | C8A       | -0.48 |
| hsa-mir-196b | C9orf98   | 0.28  |
| hsa-mir-196b | CD55      | -0.44 |
| hsa-mir-196b | CD8B      | -0.46 |
| hsa-mir-196b | CDH16     | -0.46 |
| hsa-mir-196b | CEACAM1   | -0.42 |
| hsa-mir-196b | CEACAM5   | -0.48 |
| hsa-mir-196b | CEACAM6   | -0.42 |
| hsa-mir-196b | CHMP4C    | -0.32 |
| hsa-mir-196b | CLCA2     | -0.46 |
| hsa-mir-196b | COL2A1    | -0.34 |
| hsa-mir-196b | COL4A3    | 0.3   |
| hsa-mir-196b | CREB3L3   | -0.5  |
| hsa-mir-196b | CRYBA1    | -0.16 |
| hsa-mir-196b | CTCFL     | -0.46 |
| hsa-mir-196b | CYP1A1    | -0.51 |
| hsa-mir-196b | CYP24A1   | -0.34 |
| hsa-mir-196b | CYP2F1    | -0.49 |
| hsa-mir-196b | CYP3A5    | 0.34  |
| hsa-mir-196b | CYP3A7    | 0.16  |
| hsa-mir-196b | DCDC5     | 0.35  |
| hsa-mir-196b | DMRTA1    | -0.12 |
| hsa-mir-196b | DNAH7     | 0.34  |
| hsa-mir-196b | DNAI2     | 0.51  |
| hsa-mir-196b | DNTT      | -0.29 |
| hsa-mir-196b | DSCR8     | -0.42 |
| hsa-mir-196b | DUSP13    | -0.37 |
| hsa-mir-196b | ELA3A     | -0.41 |
| hsa-mir-196b | ELN       | 0.42  |
| hsa-mir-196b | EN1       | 0.45  |
| hsa-mir-196b | F10       | -0.38 |
| hsa-mir-196b | FAIM3     | -0.38 |
| hsa-mir-196b | FAM137B   | 0.34  |
| hsa-mir-196b | FAM83A    | -0.52 |
| hsa-mir-196b | FAM83B    | -0.5  |
| hsa-mir-196b | FAM9B     | -0.46 |
| hsa-mir-196b | FBXL21    | -0.46 |
| hsa-mir-196b | FGA       | -0.45 |
| hsa-mir-196b | FGB       | -0.45 |
| hsa-mir-196b | FGF19     | -0.35 |

|              |          |       |
|--------------|----------|-------|
| hsa-mir-196b | FGF23    | -0.36 |
| hsa-mir-196b | FLJ21075 | -0.46 |
| hsa-mir-196b | FLJ34047 | -0.45 |
| hsa-mir-196b | FLJ35880 | -0.43 |
| hsa-mir-196b | FOXA2    | -0.25 |
| hsa-mir-196b | FTCD     | -0.48 |
| hsa-mir-196b | G6PC     | -0.46 |
| hsa-mir-196b | GCNT3    | -0.49 |
| hsa-mir-196b | GFI1B    | -0.48 |
| hsa-mir-196b | GPX2     | -0.46 |
| hsa-mir-196b | GYPB     | -0.49 |
| hsa-mir-196b | GYPE     | -0.55 |
| hsa-mir-196b | HDC      | 0.12  |
| hsa-mir-196b | HFE2     | -0.43 |
| hsa-mir-196b | HOTAIR   | 0.49  |
| hsa-mir-196b | HOXA10   | 0.62  |
| hsa-mir-196b | HOXA13   | 0.42  |
| hsa-mir-196b | HOXA2    | 0.53  |
| hsa-mir-196b | HOXA3    | 0.46  |
| hsa-mir-196b | HOXA4    | 0.45  |
| hsa-mir-196b | HOXA5    | 0.54  |
| hsa-mir-196b | HOXA7    | 0.51  |
| hsa-mir-196b | HOXA9    | 0.68  |
| hsa-mir-196b | HOXB8    | 0.03  |
| hsa-mir-196b | HOXB9    | -0.25 |
| hsa-mir-196b | HOXC10   | 0.28  |
| hsa-mir-196b | HOXC13   | 0.41  |
| hsa-mir-196b | HOXC8    | 0.37  |
| hsa-mir-196b | HOXC9    | 0.43  |
| hsa-mir-196b | HOXD10   | 0.42  |
| hsa-mir-196b | HSH2D    | -0.42 |
| hsa-mir-196b | ICAM4    | -0.45 |
| hsa-mir-196b | IGF2BP1  | -0.39 |
| hsa-mir-196b | IGLV2-14 | -0.45 |
| hsa-mir-196b | IL33     | 0.31  |
| hsa-mir-196b | INSL5    | 0.5   |
| hsa-mir-196b | ISL1     | -0.24 |
| hsa-mir-196b | ITIH3    | -0.39 |
| hsa-mir-196b | KCNG3    | -0.44 |
| hsa-mir-196b | KIAA1505 | 0.38  |
| hsa-mir-196b | KLF1     | -0.48 |
| hsa-mir-196b | KLK1     | -0.48 |
| hsa-mir-196b | KLK8     | -0.48 |
| hsa-mir-196b | KRT16    | -0.41 |
| hsa-mir-196b | KRT33A   | -0.45 |
| hsa-mir-196b | KRT37    | -0.45 |
| hsa-mir-196b | KRT6A    | -0.42 |
| hsa-mir-196b | KRT6B    | -0.37 |
| hsa-mir-196b | KRT6C    | -0.47 |
| hsa-mir-196b | KRT86    | -0.44 |
| hsa-mir-196b | KRTAP6-3 | 0.3   |
| hsa-mir-196b | KRTDAP   | -0.5  |
| hsa-mir-196b | L1TD1    | -0.43 |

|              |           |       |
|--------------|-----------|-------|
| hsa-mir-196b | LDLRAD1   | -0.46 |
| hsa-mir-196b | LGR5      | -0.35 |
| hsa-mir-196b | LOC129293 | -0.46 |
| hsa-mir-196b | LOC441376 | -0.42 |
| hsa-mir-196b | LOC441601 | -0.5  |
| hsa-mir-196b | MAGEA4    | -0.37 |
| hsa-mir-196b | MAGEA8    | -0.47 |
| hsa-mir-196b | MAGEA9    | -0.41 |
| hsa-mir-196b | MAGEC1    | -0.37 |
| hsa-mir-196b | MAGEC2    | -0.26 |
| hsa-mir-196b | MGC102966 | -0.4  |
| hsa-mir-196b | MGC10981  | -0.48 |
| hsa-mir-196b | MLANA     | -0.4  |
| hsa-mir-196b | MLPH      | -0.29 |
| hsa-mir-196b | MMP12     | -0.04 |
| hsa-mir-196b | MRGPRX3   | -0.46 |
| hsa-mir-196b | MS4A1     | -0.42 |
| hsa-mir-196b | MSC       | -0.31 |
| hsa-mir-196b | MSMB      | -0.47 |
| hsa-mir-196b | MUC15     | -0.26 |
| hsa-mir-196b | MYL1      | -0.34 |
| hsa-mir-196b | MYL7      | -0.48 |
| hsa-mir-196b | MYLC2PL   | -0.35 |
| hsa-mir-196b | NBLA00301 | 0.39  |
| hsa-mir-196b | NDST4     | -0.34 |
| hsa-mir-196b | NEB       | 0.4   |
| hsa-mir-196b | NOTUM     | -0.42 |
| hsa-mir-196b | NOX5      | -0.47 |
| hsa-mir-196b | NPFFR2    | -0.49 |
| hsa-mir-196b | NRG4      | -0.5  |
| hsa-mir-196b | NTF3      | -0.33 |
| hsa-mir-196b | ODAM      | -0.43 |
| hsa-mir-196b | OR1D2     | -0.54 |
| hsa-mir-196b | OR51I1    | -0.49 |
| hsa-mir-196b | OTP       | 0.51  |
| hsa-mir-196b | PIAS4     | -0.37 |
| hsa-mir-196b | PITX2     | 0.07  |
| hsa-mir-196b | PIWIL2    | -0.47 |
| hsa-mir-196b | PLA2G12B  | -0.41 |
| hsa-mir-196b | PNLIPRP2  | -0.44 |
| hsa-mir-196b | POU5F1P3  | -0.41 |
| hsa-mir-196b | PRAMEF8   | -0.44 |
| hsa-mir-196b | PRAP1     | -0.51 |
| hsa-mir-196b | PRDM13    | 0.28  |
| hsa-mir-196b | PRDM7     | -0.47 |
| hsa-mir-196b | PRDM9     | -0.5  |
| hsa-mir-196b | PRODH2    | -0.47 |
| hsa-mir-196b | PRPH      | 0.38  |
| hsa-mir-196b | PRSS1     | -0.54 |
| hsa-mir-196b | PRSS12    | 0.22  |
| hsa-mir-196b | PRSS2     | -0.53 |
| hsa-mir-196b | PRSS21    | -0.45 |
| hsa-mir-196b | PRSS3     | -0.47 |

|              |           |       |
|--------------|-----------|-------|
| hsa-mir-196b | PRSS7     | -0.42 |
| hsa-mir-196b | RAB25     | -0.44 |
| hsa-mir-196b | RAET1E    | -0.45 |
| hsa-mir-196b | RFTN2     | 0.34  |
| hsa-mir-196b | RFX4      | 0.38  |
| hsa-mir-196b | RHD       | -0.42 |
| hsa-mir-196b | RNF212    | -0.38 |
| hsa-mir-196b | ROBO2     | 0.33  |
| hsa-mir-196b | SAGE1     | -0.37 |
| hsa-mir-196b | SCUBE2    | 0.36  |
| hsa-mir-196b | SERPINA11 | -0.46 |
| hsa-mir-196b | SERPINA4  | -0.49 |
| hsa-mir-196b | SERPINA7  | -0.44 |
| hsa-mir-196b | SERPINB5  | -0.45 |
| hsa-mir-196b | SFTPA1    | -0.43 |
| hsa-mir-196b | SLC12A3   | -0.51 |
| hsa-mir-196b | SLC17A2   | -0.49 |
| hsa-mir-196b | SLC18A1   | -0.15 |
| hsa-mir-196b | SLC39A5   | -0.47 |
| hsa-mir-196b | SLC44A4   | -0.44 |
| hsa-mir-196b | SLC45A2   | -0.49 |
| hsa-mir-196b | SLC6A4    | -0.48 |
| hsa-mir-196b | SMPDL3B   | -0.44 |
| hsa-mir-196b | SPAG1     | 0.38  |
| hsa-mir-196b | SPANXD    | -0.38 |
| hsa-mir-196b | SPINK4    | -0.43 |
| hsa-mir-196b | SPINK5    | -0.45 |
| hsa-mir-196b | SPRR1B    | -0.53 |
| hsa-mir-196b | SPRR2D    | -0.44 |
| hsa-mir-196b | SPTA1     | -0.31 |
| hsa-mir-196b | SSX1      | -0.45 |
| hsa-mir-196b | SSX7      | -0.42 |
| hsa-mir-196b | STGC3     | -0.45 |
| hsa-mir-196b | SULT1C4   | 0.48  |
| hsa-mir-196b | SULT2A1   | -0.46 |
| hsa-mir-196b | SVEP1     | 0.08  |
| hsa-mir-196b | TJP3      | -0.48 |
| hsa-mir-196b | TMEM16J   | -0.46 |
| hsa-mir-196b | TNFRSF18  | -0.41 |
| hsa-mir-196b | TP53TG3   | -0.34 |
| hsa-mir-196b | TPO       | -0.4  |
| hsa-mir-196b | TRIM15    | -0.4  |
| hsa-mir-196b | TRIM49    | -0.32 |
| hsa-mir-196b | TRPM1     | -0.51 |
| hsa-mir-196b | TSPY2     | -0.43 |
| hsa-mir-196b | UGT2B28   | -0.51 |
| hsa-mir-196b | UGT2B7    | -0.32 |
| hsa-mir-196b | USP44     | -0.41 |
| hsa-mir-196b | VIL1      | -0.48 |
| hsa-mir-196b | XKR3      | -0.43 |
| hsa-mir-197  | C10orf111 | 0.33  |
| hsa-mir-197  | CASKIN1   | -0.05 |
| hsa-mir-197  | CDC7      | 0.28  |

|              |           |       |
|--------------|-----------|-------|
| hsa-mir-197  | CDKN1A    | -0.35 |
| hsa-mir-197  | EID3      | -0.12 |
| hsa-mir-197  | FAM133A   | 0.18  |
| hsa-mir-197  | HPR       | -0.15 |
| hsa-mir-197  | HSF2      | 0.28  |
| hsa-mir-197  | LCE5A     | -0.06 |
| hsa-mir-197  | MMP12     | 0.1   |
| hsa-mir-197  | MS4A7     | -0.19 |
| hsa-mir-197  | NMU       | 0.19  |
| hsa-mir-197  | PCDHB5    | -0.02 |
| hsa-mir-197  | PHLDA3    | -0.28 |
| hsa-mir-197  | POLB      | 0.22  |
| hsa-mir-197  | POSTN     | -0.23 |
| hsa-mir-197  | RARRES1   | -0.23 |
| hsa-mir-197  | SLITRK4   | 0.13  |
| hsa-mir-197  | TMSL8     | 0.22  |
| hsa-mir-197  | TNFRSF10C | -0.36 |
| hsa-mir-197  | TREM2     | -0.1  |
| hsa-mir-198  | ABAT      | -0.35 |
| hsa-mir-198  | ARHGAP29  | 0.24  |
| hsa-mir-198  | C9orf47   | 0.53  |
| hsa-mir-198  | CABP7     | 0.38  |
| hsa-mir-198  | CCL20     | 0.36  |
| hsa-mir-198  | CCL23     | 0.37  |
| hsa-mir-198  | CD86      | 0.5   |
| hsa-mir-198  | CGB1      | 0.41  |
| hsa-mir-198  | CNN2      | 0.4   |
| hsa-mir-198  | CXCL1     | 0.31  |
| hsa-mir-198  | CXCL13    | 0.3   |
| hsa-mir-198  | CXCL3     | 0.34  |
| hsa-mir-198  | CXCL5     | 0.37  |
| hsa-mir-198  | EREG      | 0.35  |
| hsa-mir-198  | FAM19A1   | -0.3  |
| hsa-mir-198  | FLJ38723  | 0.42  |
| hsa-mir-198  | IL1F10    | 0.48  |
| hsa-mir-198  | IL7R      | 0.41  |
| hsa-mir-198  | IL8       | 0.33  |
| hsa-mir-198  | LUM       | 0.39  |
| hsa-mir-198  | MAPK13    | 0.38  |
| hsa-mir-198  | MMD2      | -0.28 |
| hsa-mir-198  | MME       | 0.34  |
| hsa-mir-198  | MMP1      | 0.34  |
| hsa-mir-198  | OSTbeta   | 0.16  |
| hsa-mir-198  | PCSK4     | 0.44  |
| hsa-mir-198  | RETN      | 0.34  |
| hsa-mir-198  | RPA4      | 0.45  |
| hsa-mir-198  | S100A8    | 0.31  |
| hsa-mir-198  | SAPS1     | 0.52  |
| hsa-mir-198  | SPINK6    | 0.3   |
| hsa-mir-198  | SRD5A2L   | 0.22  |
| hsa-mir-198  | VPS18     | 0.48  |
| hsa-mir-199a | ABAT      | -0.45 |
| hsa-mir-199a | ACP5      | 0.37  |

|              |          |       |
|--------------|----------|-------|
| hsa-mir-199a | ACTA2    | 0.37  |
| hsa-mir-199a | ACTG2    | 0.4   |
| hsa-mir-199a | AEBP1    | 0.2   |
| hsa-mir-199a | AIM2     | 0.33  |
| hsa-mir-199a | ALDH1A3  | 0.34  |
| hsa-mir-199a | ALPK2    | 0.38  |
| hsa-mir-199a | ANGPTL5  | 0.14  |
| hsa-mir-199a | ANTXR2   | 0.5   |
| hsa-mir-199a | AREG     | 0.36  |
| hsa-mir-199a | ARL8A    | -0.26 |
| hsa-mir-199a | ASAM     | 0.42  |
| hsa-mir-199a | ASPN     | 0.54  |
| hsa-mir-199a | BAALC    | -0.33 |
| hsa-mir-199a | BGN      | 0.52  |
| hsa-mir-199a | BNC2     | 0.47  |
| hsa-mir-199a | C13orf33 | 0.37  |
| hsa-mir-199a | C1orf61  | -0.46 |
| hsa-mir-199a | C3orf39  | -0.39 |
| hsa-mir-199a | C3orf64  | 0.45  |
| hsa-mir-199a | C4orf32  | 0.44  |
| hsa-mir-199a | C7       | 0.27  |
| hsa-mir-199a | CADM2    | -0.32 |
| hsa-mir-199a | CCL26    | 0.39  |
| hsa-mir-199a | CD248    | 0.51  |
| hsa-mir-199a | CD28     | 0.37  |
| hsa-mir-199a | CD34     | 0.27  |
| hsa-mir-199a | CD36     | 0.33  |
| hsa-mir-199a | CD3G     | 0.22  |
| hsa-mir-199a | CD70     | 0.24  |
| hsa-mir-199a | CFH      | 0.42  |
| hsa-mir-199a | CFHR3    | 0.39  |
| hsa-mir-199a | CILP     | 0.43  |
| hsa-mir-199a | CKB      | -0.49 |
| hsa-mir-199a | CNN2     | 0.52  |
| hsa-mir-199a | COL10A1  | 0.61  |
| hsa-mir-199a | COL12A1  | 0.66  |
| hsa-mir-199a | COL14A1  | 0.37  |
| hsa-mir-199a | COL15A1  | 0.52  |
| hsa-mir-199a | COL1A1   | 0.64  |
| hsa-mir-199a | COL1A2   | 0.73  |
| hsa-mir-199a | COL24A1  | 0.42  |
| hsa-mir-199a | COL3A1   | 0.63  |
| hsa-mir-199a | COL4A2   | 0.3   |
| hsa-mir-199a | COL5A1   | 0.59  |
| hsa-mir-199a | COL5A2   | 0.62  |
| hsa-mir-199a | COL6A1   | 0.53  |
| hsa-mir-199a | COL6A2   | 0.59  |
| hsa-mir-199a | COL6A3   | 0.75  |
| hsa-mir-199a | CPA3     | 0.47  |
| hsa-mir-199a | CPZ      | 0.41  |
| hsa-mir-199a | CRABP2   | 0.54  |
| hsa-mir-199a | CRB1     | -0.34 |
| hsa-mir-199a | CRIP1    | 0.43  |

|              |          |       |
|--------------|----------|-------|
| hsa-mir-199a | CTHRC1   | 0.51  |
| hsa-mir-199a | CTSK     | 0.47  |
| hsa-mir-199a | CXCL12   | 0.38  |
| hsa-mir-199a | CXCL13   | 0.46  |
| hsa-mir-199a | CXCL9    | 0.3   |
| hsa-mir-199a | CXorf36  | 0.24  |
| hsa-mir-199a | CYP1B1   | 0.43  |
| hsa-mir-199a | DAZL     | 0.08  |
| hsa-mir-199a | DCN      | 0.63  |
| hsa-mir-199a | DKK1     | 0.25  |
| hsa-mir-199a | DKK2     | 0.42  |
| hsa-mir-199a | DOK2     | 0.47  |
| hsa-mir-199a | DPT      | 0.61  |
| hsa-mir-199a | EBF1     | 0.47  |
| hsa-mir-199a | EGFL6    | 0.43  |
| hsa-mir-199a | EGFLAM   | 0.39  |
| hsa-mir-199a | ELTD1    | 0.24  |
| hsa-mir-199a | ENPP1    | 0.35  |
| hsa-mir-199a | EPYC     | 0.46  |
| hsa-mir-199a | F2RL2    | 0.5   |
| hsa-mir-199a | FABP4    | 0.48  |
| hsa-mir-199a | FADS1    | -0.25 |
| hsa-mir-199a | FAM20A   | 0.45  |
| hsa-mir-199a | FAM26E   | 0.54  |
| hsa-mir-199a | FAM5C    | -0.45 |
| hsa-mir-199a | FAP      | 0.59  |
| hsa-mir-199a | FBLN1    | 0.54  |
| hsa-mir-199a | FBLN2    | 0.37  |
| hsa-mir-199a | FCN3     | 0.37  |
| hsa-mir-199a | FGF5     | 0.25  |
| hsa-mir-199a | FGFBP3   | -0.3  |
| hsa-mir-199a | FHL5     | 0.14  |
| hsa-mir-199a | FILIP1   | 0.2   |
| hsa-mir-199a | FKBP11   | 0.49  |
| hsa-mir-199a | FKBP7    | 0.52  |
| hsa-mir-199a | FLJ22662 | 0.47  |
| hsa-mir-199a | FLT1     | 0.24  |
| hsa-mir-199a | FMO1     | 0.59  |
| hsa-mir-199a | FNDC1    | 0.51  |
| hsa-mir-199a | FZD1     | 0.49  |
| hsa-mir-199a | GALNT5   | 0.36  |
| hsa-mir-199a | GATA6    | 0.42  |
| hsa-mir-199a | GGA1     | -0.03 |
| hsa-mir-199a | GJA4     | 0.25  |
| hsa-mir-199a | GLT8D2   | 0.6   |
| hsa-mir-199a | GLT8D4   | 0.5   |
| hsa-mir-199a | GNG11    | 0.29  |
| hsa-mir-199a | GPM6B    | -0.44 |
| hsa-mir-199a | GPR116   | 0.19  |
| hsa-mir-199a | GPR124   | 0.56  |
| hsa-mir-199a | GZMK     | 0.39  |
| hsa-mir-199a | HMCN1    | 0.49  |
| hsa-mir-199a | HTRA3    | 0.5   |



|              |           |       |
|--------------|-----------|-------|
| hsa-mir-199a | IFNE1     | 0.04  |
| hsa-mir-199a | IGFL2     | 0.05  |
| hsa-mir-199a | IL18R1    | 0.51  |
| hsa-mir-199a | IL1R1     | 0.47  |
| hsa-mir-199a | IL1RAP    | 0.12  |
| hsa-mir-199a | IL7R      | 0.37  |
| hsa-mir-199a | INHBA     | 0.46  |
| hsa-mir-199a | ISLR      | 0.49  |
| hsa-mir-199a | ITGA11    | 0.56  |
| hsa-mir-199a | ITGA4     | 0.46  |
| hsa-mir-199a | ITGBL1    | 0.52  |
| hsa-mir-199a | KCND2     | -0.31 |
| hsa-mir-199a | KCNJ8     | 0.04  |
| hsa-mir-199a | KDELR3    | 0.56  |
| hsa-mir-199a | LAMB1     | 0.55  |
| hsa-mir-199a | LAMC3     | 0.21  |
| hsa-mir-199a | LEPRE1    | 0.6   |
| hsa-mir-199a | LEPREL2   | 0.49  |
| hsa-mir-199a | LOC493869 | 0.44  |
| hsa-mir-199a | LOX       | 0.4   |
| hsa-mir-199a | LOXL1     | 0.4   |
| hsa-mir-199a | LOXL2     | 0.5   |
| hsa-mir-199a | LPHN3     | -0.33 |
| hsa-mir-199a | LRRC15    | 0.43  |
| hsa-mir-199a | LRRC17    | 0.3   |
| hsa-mir-199a | LRRC32    | 0.38  |
| hsa-mir-199a | LUM       | 0.67  |
| hsa-mir-199a | MARK1     | -0.34 |
| hsa-mir-199a | MDFIC     | 0.47  |
| hsa-mir-199a | MFAP2     | 0.57  |
| hsa-mir-199a | MFAP4     | 0.43  |
| hsa-mir-199a | MFAP5     | 0.36  |
| hsa-mir-199a | MGP       | 0.45  |
| hsa-mir-199a | MME       | 0.46  |
| hsa-mir-199a | MMP11     | 0.63  |
| hsa-mir-199a | MMP13     | 0.52  |
| hsa-mir-199a | MMP9      | 0.35  |
| hsa-mir-199a | MOSC1     | -0.37 |
| hsa-mir-199a | MSC       | 0.32  |
| hsa-mir-199a | MXRA5     | 0.49  |
| hsa-mir-199a | MXRA8     | 0.47  |
| hsa-mir-199a | MYH9      | 0.46  |
| hsa-mir-199a | MYO1B     | 0.46  |
| hsa-mir-199a | NCAM2     | -0.29 |
| hsa-mir-199a | NDRG2     | -0.48 |
| hsa-mir-199a | NID2      | 0.46  |
| hsa-mir-199a | NLGN1     | -0.39 |
| hsa-mir-199a | NLGN3     | -0.44 |
| hsa-mir-199a | NOL4      | -0.22 |
| hsa-mir-199a | OGN       | 0.36  |
| hsa-mir-199a | OLFML2B   | 0.5   |
| hsa-mir-199a | OLIG1     | -0.5  |
| hsa-mir-199a | OLIG2     | -0.47 |

|              |          |       |
|--------------|----------|-------|
| hsa-mir-199a | OMD      | 0.41  |
| hsa-mir-199a | OR51E1   | 0.3   |
| hsa-mir-199a | P4HA2    | 0.52  |
| hsa-mir-199a | P4HA3    | 0.54  |
| hsa-mir-199a | PARC     | -0.23 |
| hsa-mir-199a | PCDH17   | -0.3  |
| hsa-mir-199a | PCOLCE   | 0.67  |
| hsa-mir-199a | PDGFRB   | 0.53  |
| hsa-mir-199a | PDLIM1   | 0.36  |
| hsa-mir-199a | PERP     | 0.25  |
| hsa-mir-199a | PHLDB2   | 0.44  |
| hsa-mir-199a | PLN      | 0.31  |
| hsa-mir-199a | PLVAP    | 0.35  |
| hsa-mir-199a | PMAIP1   | 0.36  |
| hsa-mir-199a | POSTN    | 0.43  |
| hsa-mir-199a | PPEF1    | 0.39  |
| hsa-mir-199a | PPIC     | 0.43  |
| hsa-mir-199a | PRR16    | 0.44  |
| hsa-mir-199a | PRRX2    | 0.35  |
| hsa-mir-199a | PSCD3    | 0.37  |
| hsa-mir-199a | PSD2     | -0.34 |
| hsa-mir-199a | PTGER2   | 0.41  |
| hsa-mir-199a | PTGER4   | 0.43  |
| hsa-mir-199a | PTGFR    | 0.2   |
| hsa-mir-199a | PTGIS    | 0.43  |
| hsa-mir-199a | PTPRZ1   | -0.43 |
| hsa-mir-199a | RCN3     | 0.6   |
| hsa-mir-199a | RNF152   | 0.43  |
| hsa-mir-199a | RUNX2    | 0.56  |
| hsa-mir-199a | SALL2    | -0.48 |
| hsa-mir-199a | SALL3    | -0.33 |
| hsa-mir-199a | SCD5     | -0.36 |
| hsa-mir-199a | SCG3     | -0.44 |
| hsa-mir-199a | SEC24D   | 0.53  |
| hsa-mir-199a | SEMA3C   | 0.35  |
| hsa-mir-199a | SEMA7A   | 0.27  |
| hsa-mir-199a | SERPINH1 | 0.47  |
| hsa-mir-199a | SERTAD4  | 0.3   |
| hsa-mir-199a | SFRP2    | 0.37  |
| hsa-mir-199a | SGCD     | 0.25  |
| hsa-mir-199a | SH2B3    | 0.41  |
| hsa-mir-199a | SHC4     | -0.06 |
| hsa-mir-199a | SLC24A5  | -0.43 |
| hsa-mir-199a | SLC25A24 | 0.44  |
| hsa-mir-199a | SLC25A4  | -0.41 |
| hsa-mir-199a | SMOC2    | 0.4   |
| hsa-mir-199a | SNAI2    | 0.62  |
| hsa-mir-199a | SPON2    | 0.48  |
| hsa-mir-199a | STRA6    | 0.44  |
| hsa-mir-199a | SVIL     | 0.5   |
| hsa-mir-199a | TAGLN    | 0.27  |
| hsa-mir-199a | TBC1D8B  | 0.49  |
| hsa-mir-199a | TES      | 0.43  |

|               |          |       |
|---------------|----------|-------|
| hsa-mir-199a  | TGFBI    | 0.49  |
| hsa-mir-199a  | THBS1    | 0.52  |
| hsa-mir-199a  | THBS4    | -0.01 |
| hsa-mir-199a  | TMEM145  | -0.36 |
| hsa-mir-199a  | TMEM16A  | 0.45  |
| hsa-mir-199a  | TNFRSF4  | 0.3   |
| hsa-mir-199a  | TNMD     | 0.24  |
| hsa-mir-199a  | TPM4     | 0.48  |
| hsa-mir-199a  | TPSAB1   | 0.36  |
| hsa-mir-199a  | TRPC6    | 0.28  |
| hsa-mir-199a  | TSPAN3   | -0.36 |
| hsa-mir-199a  | TTYH1    | -0.5  |
| hsa-mir-199a  | TUBB2B   | -0.33 |
| hsa-mir-199a  | TWIST1   | 0.48  |
| hsa-mir-199a  | UGT2A3   | -0.15 |
| hsa-mir-199a  | VDR      | 0.49  |
| hsa-mir-199a  | VEGFC    | 0.43  |
| hsa-mir-199a  | WISP1    | 0.45  |
| hsa-mir-199a  | WISP2    | 0.16  |
| hsa-mir-199a  | ZBED2    | 0.28  |
| hsa-mir-199a  | ZCCHC5   | 0.43  |
| hsa-mir-199a  | ZP1      | 0.31  |
| hsa-mir-199a* | ABAT     | -0.44 |
| hsa-mir-199a* | ACP5     | 0.37  |
| hsa-mir-199a* | ACTA2    | 0.4   |
| hsa-mir-199a* | ACTG2    | 0.42  |
| hsa-mir-199a* | ADAM12   | 0.45  |
| hsa-mir-199a* | ADCY8    | -0.29 |
| hsa-mir-199a* | AGT      | -0.32 |
| hsa-mir-199a* | AIM2     | 0.34  |
| hsa-mir-199a* | ALDH1A3  | 0.36  |
| hsa-mir-199a* | ALDH6A1  | -0.38 |
| hsa-mir-199a* | ALPK2    | 0.4   |
| hsa-mir-199a* | ANXA2    | 0.32  |
| hsa-mir-199a* | AREG     | 0.38  |
| hsa-mir-199a* | ARL8A    | -0.27 |
| hsa-mir-199a* | ASAM     | 0.41  |
| hsa-mir-199a* | ASPN     | 0.57  |
| hsa-mir-199a* | BAALC    | -0.33 |
| hsa-mir-199a* | BCAN     | -0.43 |
| hsa-mir-199a* | BGN      | 0.48  |
| hsa-mir-199a* | C13orf29 | 0.31  |
| hsa-mir-199a* | C13orf33 | 0.39  |
| hsa-mir-199a* | C1orf61  | -0.4  |
| hsa-mir-199a* | C1QTNF6  | 0.38  |
| hsa-mir-199a* | C3orf39  | -0.37 |
| hsa-mir-199a* | C3orf64  | 0.45  |
| hsa-mir-199a* | C4orf32  | 0.41  |
| hsa-mir-199a* | C9orf61  | -0.36 |
| hsa-mir-199a* | CCL26    | 0.38  |
| hsa-mir-199a* | CD248    | 0.51  |
| hsa-mir-199a* | CD28     | 0.37  |
| hsa-mir-199a* | CD36     | 0.31  |

|               |         |       |
|---------------|---------|-------|
| hsa-mir-199a* | CD70    | 0.28  |
| hsa-mir-199a* | CD72    | 0.4   |
| hsa-mir-199a* | CD93    | 0.39  |
| hsa-mir-199a* | CDH10   | -0.35 |
| hsa-mir-199a* | CDH11   | 0.41  |
| hsa-mir-199a* | CFHR3   | 0.37  |
| hsa-mir-199a* | CILP    | 0.42  |
| hsa-mir-199a* | CKB     | -0.49 |
| hsa-mir-199a* | CNN2    | 0.49  |
| hsa-mir-199a* | COL10A1 | 0.59  |
| hsa-mir-199a* | COL12A1 | 0.68  |
| hsa-mir-199a* | COL13A1 | 0.34  |
| hsa-mir-199a* | COL14A1 | 0.39  |
| hsa-mir-199a* | COL15A1 | 0.54  |
| hsa-mir-199a* | COL1A1  | 0.63  |
| hsa-mir-199a* | COL1A2  | 0.72  |
| hsa-mir-199a* | COL24A1 | 0.35  |
| hsa-mir-199a* | COL3A1  | 0.63  |
| hsa-mir-199a* | COL4A2  | 0.33  |
| hsa-mir-199a* | COL5A1  | 0.58  |
| hsa-mir-199a* | COL5A2  | 0.61  |
| hsa-mir-199a* | COL6A1  | 0.49  |
| hsa-mir-199a* | COL6A2  | 0.56  |
| hsa-mir-199a* | COL6A3  | 0.7   |
| hsa-mir-199a* | COLEC12 | 0.23  |
| hsa-mir-199a* | CPA3    | 0.45  |
| hsa-mir-199a* | CPZ     | 0.39  |
| hsa-mir-199a* | CRABP2  | 0.48  |
| hsa-mir-199a* | CRB1    | -0.33 |
| hsa-mir-199a* | CRIP1   | 0.44  |
| hsa-mir-199a* | CSTA    | 0.36  |
| hsa-mir-199a* | CTHRC1  | 0.52  |
| hsa-mir-199a* | CTSK    | 0.44  |
| hsa-mir-199a* | CXCL12  | 0.34  |
| hsa-mir-199a* | CXCL13  | 0.39  |
| hsa-mir-199a* | CXCL9   | 0.32  |
| hsa-mir-199a* | CXCR3   | 0.24  |
| hsa-mir-199a* | CYP1B1  | 0.39  |
| hsa-mir-199a* | DC2     | 0.42  |
| hsa-mir-199a* | DCBLD2  | 0.34  |
| hsa-mir-199a* | DCN     | 0.59  |
| hsa-mir-199a* | DKK1    | 0.25  |
| hsa-mir-199a* | DPT     | 0.55  |
| hsa-mir-199a* | EBF1    | 0.41  |
| hsa-mir-199a* | EGFL6   | 0.42  |
| hsa-mir-199a* | EGFLAM  | 0.35  |
| hsa-mir-199a* | ELTD1   | 0.22  |
| hsa-mir-199a* | ENPEP   | 0.29  |
| hsa-mir-199a* | ENPP1   | 0.35  |
| hsa-mir-199a* | EPYC    | 0.47  |
| hsa-mir-199a* | ERRFI1  | 0.4   |
| hsa-mir-199a* | ESM1    | 0.32  |
| hsa-mir-199a* | FABP4   | 0.43  |

|               |          |       |
|---------------|----------|-------|
| hsa-mir-199a* | FAM26E   | 0.53  |
| hsa-mir-199a* | FAM5C    | -0.42 |
| hsa-mir-199a* | FAM70A   | -0.14 |
| hsa-mir-199a* | FAP      | 0.56  |
| hsa-mir-199a* | FBLN1    | 0.5   |
| hsa-mir-199a* | FBLN2    | 0.36  |
| hsa-mir-199a* | FCN3     | 0.35  |
| hsa-mir-199a* | FEZ1     | -0.44 |
| hsa-mir-199a* | FGF5     | 0.22  |
| hsa-mir-199a* | FGFR3    | -0.28 |
| hsa-mir-199a* | FHL2     | 0.34  |
| hsa-mir-199a* | FHL5     | 0.14  |
| hsa-mir-199a* | FKBP11   | 0.48  |
| hsa-mir-199a* | FKBP7    | 0.54  |
| hsa-mir-199a* | FLJ22662 | 0.42  |
| hsa-mir-199a* | FLJ39822 | 0.01  |
| hsa-mir-199a* | FMO1     | 0.54  |
| hsa-mir-199a* | FNDC1    | 0.5   |
| hsa-mir-199a* | FXVD6    | -0.39 |
| hsa-mir-199a* | FZD1     | 0.48  |
| hsa-mir-199a* | GALNT5   | 0.35  |
| hsa-mir-199a* | GATA6    | 0.4   |
| hsa-mir-199a* | GDAP1L1  | -0.36 |
| hsa-mir-199a* | GLT8D2   | 0.58  |
| hsa-mir-199a* | GLT8D4   | 0.47  |
| hsa-mir-199a* | GNG11    | 0.28  |
| hsa-mir-199a* | GPM6B    | -0.4  |
| hsa-mir-199a* | GPR124   | 0.55  |
| hsa-mir-199a* | GZMB     | 0.36  |
| hsa-mir-199a* | HGF      | 0.34  |
| hsa-mir-199a* | HMCN1    | 0.44  |
| hsa-mir-199a* | HPR      | -0.09 |
| hsa-mir-199a* | HS3ST3A1 | 0.34  |
| hsa-mir-199a* | HTRA3    | 0.48  |
| hsa-mir-199a* | IER2     | 0.29  |
| hsa-mir-199a* | IFNE1    | 0.06  |
| hsa-mir-199a* | IGFL2    | 0.08  |
| hsa-mir-199a* | IGSF11   | -0.37 |
| hsa-mir-199a* | IKIP     | 0.42  |
| hsa-mir-199a* | IL17D    | -0.42 |
| hsa-mir-199a* | IL18R1   | 0.42  |
| hsa-mir-199a* | IL1RAP   | 0.17  |
| hsa-mir-199a* | IL2RB    | 0.44  |
| hsa-mir-199a* | INHBA    | 0.46  |
| hsa-mir-199a* | ISLR     | 0.46  |
| hsa-mir-199a* | ITGA11   | 0.52  |
| hsa-mir-199a* | ITGA4    | 0.47  |
| hsa-mir-199a* | ITGA8    | 0.21  |
| hsa-mir-199a* | ITGBL1   | 0.51  |
| hsa-mir-199a* | ITM2C    | -0.34 |
| hsa-mir-199a* | KCND2    | -0.3  |
| hsa-mir-199a* | KCNJ15   | 0.44  |
| hsa-mir-199a* | KCNN3    | -0.32 |

|               |           |       |
|---------------|-----------|-------|
| hsa-mir-199a* | KDELR3    | 0.55  |
| hsa-mir-199a* | KLRD1     | 0.25  |
| hsa-mir-199a* | LAMB1     | 0.56  |
| hsa-mir-199a* | LAMC3     | 0.21  |
| hsa-mir-199a* | LEMD1     | 0.22  |
| hsa-mir-199a* | LEPRE1    | 0.59  |
| hsa-mir-199a* | LIMS3     | 0.3   |
| hsa-mir-199a* | LOC202459 | 0.4   |
| hsa-mir-199a* | LOC389073 | -0.22 |
| hsa-mir-199a* | LOC493869 | 0.43  |
| hsa-mir-199a* | LOX       | 0.37  |
| hsa-mir-199a* | LOXL1     | 0.42  |
| hsa-mir-199a* | LOXL2     | 0.48  |
| hsa-mir-199a* | LPHN3     | -0.31 |
| hsa-mir-199a* | LRP1B     | -0.2  |
| hsa-mir-199a* | LRRC17    | 0.26  |
| hsa-mir-199a* | LRRC32    | 0.37  |
| hsa-mir-199a* | LRRC36    | -0.1  |
| hsa-mir-199a* | LRRTM3    | -0.34 |
| hsa-mir-199a* | LTBP1     | 0.3   |
| hsa-mir-199a* | LUM       | 0.64  |
| hsa-mir-199a* | LUZP2     | -0.3  |
| hsa-mir-199a* | MALL      | 0.34  |
| hsa-mir-199a* | MARVELD1  | 0.4   |
| hsa-mir-199a* | MFAP2     | 0.55  |
| hsa-mir-199a* | MFAP4     | 0.4   |
| hsa-mir-199a* | MFAP5     | 0.37  |
| hsa-mir-199a* | MGC24103  | 0.38  |
| hsa-mir-199a* | MGC42105  | -0.3  |
| hsa-mir-199a* | MGP       | 0.44  |
| hsa-mir-199a* | MME       | 0.43  |
| hsa-mir-199a* | MMP11     | 0.59  |
| hsa-mir-199a* | MMP12     | 0.15  |
| hsa-mir-199a* | MMP13     | 0.51  |
| hsa-mir-199a* | MMP9      | 0.36  |
| hsa-mir-199a* | MOSC1     | -0.38 |
| hsa-mir-199a* | MXRA5     | 0.47  |
| hsa-mir-199a* | MXRA8     | 0.46  |
| hsa-mir-199a* | MYH9      | 0.47  |
| hsa-mir-199a* | MYL9      | 0.45  |
| hsa-mir-199a* | MYO1B     | 0.45  |
| hsa-mir-199a* | NDRG2     | -0.49 |
| hsa-mir-199a* | NDUFA4L2  | 0.26  |
| hsa-mir-199a* | NID1      | 0.39  |
| hsa-mir-199a* | NID2      | 0.48  |
| hsa-mir-199a* | NLGN1     | -0.33 |
| hsa-mir-199a* | NLGN3     | -0.41 |
| hsa-mir-199a* | NOX4      | 0.28  |
| hsa-mir-199a* | NPAS3     | -0.24 |
| hsa-mir-199a* | OASL      | 0.11  |
| hsa-mir-199a* | OGN       | 0.38  |
| hsa-mir-199a* | OLIG1     | -0.46 |
| hsa-mir-199a* | OLIG2     | -0.45 |

|               |              |       |
|---------------|--------------|-------|
| hsa-mir-199a* | OMD          | 0.41  |
| hsa-mir-199a* | P4HA2        | 0.48  |
| hsa-mir-199a* | P4HA3        | 0.53  |
| hsa-mir-199a* | PCDH18       | 0.38  |
| hsa-mir-199a* | PCOLCE       | 0.64  |
| hsa-mir-199a* | PDGFRB       | 0.5   |
| hsa-mir-199a* | PDLIM1       | 0.36  |
| hsa-mir-199a* | PDLIM3       | 0.04  |
| hsa-mir-199a* | PERP         | 0.2   |
| hsa-mir-199a* | PHLDB2       | 0.41  |
| hsa-mir-199a* | PITPNC1      | -0.32 |
| hsa-mir-199a* | PLN          | 0.35  |
| hsa-mir-199a* | PMAIP1       | 0.35  |
| hsa-mir-199a* | POSTN        | 0.42  |
| hsa-mir-199a* | PPEF1        | 0.36  |
| hsa-mir-199a* | PRKCDBP      | 0.31  |
| hsa-mir-199a* | PRR16        | 0.4   |
| hsa-mir-199a* | PRRX2        | 0.35  |
| hsa-mir-199a* | PSAT1        | -0.36 |
| hsa-mir-199a* | PTGER2       | 0.4   |
| hsa-mir-199a* | PTGER4       | 0.44  |
| hsa-mir-199a* | PTGIS        | 0.41  |
| hsa-mir-199a* | PTPRZ1       | -0.38 |
| hsa-mir-199a* | RAB6IP1      | -0.35 |
| hsa-mir-199a* | RAI14        | 0.45  |
| hsa-mir-199a* | RCN3         | 0.59  |
| hsa-mir-199a* | RLBP1        | -0.29 |
| hsa-mir-199a* | RNF152       | 0.44  |
| hsa-mir-199a* | RP13-102H20. | -0.24 |
| hsa-mir-199a* | RUNX2        | 0.51  |
| hsa-mir-199a* | S100A4       | 0.35  |
| hsa-mir-199a* | S100B        | -0.32 |
| hsa-mir-199a* | SALL1        | -0.16 |
| hsa-mir-199a* | SALL2        | -0.44 |
| hsa-mir-199a* | SALL3        | -0.29 |
| hsa-mir-199a* | SCD5         | -0.37 |
| hsa-mir-199a* | SCG3         | -0.41 |
| hsa-mir-199a* | SEC24D       | 0.53  |
| hsa-mir-199a* | SEMA3C       | 0.34  |
| hsa-mir-199a* | SERPINE1     | 0.3   |
| hsa-mir-199a* | SERPINH1     | 0.47  |
| hsa-mir-199a* | SFRP2        | 0.35  |
| hsa-mir-199a* | SGCD         | 0.26  |
| hsa-mir-199a* | SHC4         | -0.02 |
| hsa-mir-199a* | SHD          | -0.35 |
| hsa-mir-199a* | SLC25A24     | 0.43  |
| hsa-mir-199a* | SLC25A4      | -0.39 |
| hsa-mir-199a* | SMARCD3      | -0.43 |
| hsa-mir-199a* | SMOC2        | 0.38  |
| hsa-mir-199a* | SNAI2        | 0.57  |
| hsa-mir-199a* | SP8          | 0.05  |
| hsa-mir-199a* | SPCS3        | 0.32  |
| hsa-mir-199a* | SPON2        | 0.47  |

|               |         |       |
|---------------|---------|-------|
| hsa-mir-199a* | STRA6   | 0.45  |
| hsa-mir-199a* | SVIL    | 0.5   |
| hsa-mir-199a* | TAGLN   | 0.31  |
| hsa-mir-199a* | TBC1D8B | 0.47  |
| hsa-mir-199a* | TDO2    | 0.38  |
| hsa-mir-199a* | TGFBI   | 0.45  |
| hsa-mir-199a* | THBS1   | 0.5   |
| hsa-mir-199a* | THBS2   | 0.38  |
| hsa-mir-199a* | TMEM108 | -0.08 |
| hsa-mir-199a* | TMEM166 | 0.36  |
| hsa-mir-199a* | TMEM16A | 0.49  |
| hsa-mir-199a* | TMEM2   | 0.44  |
| hsa-mir-199a* | TMEPAI  | 0.36  |
| hsa-mir-199a* | TNMD    | 0.25  |
| hsa-mir-199a* | TPBG    | 0.41  |
| hsa-mir-199a* | TPM1    | 0.44  |
| hsa-mir-199a* | TPM2    | 0.49  |
| hsa-mir-199a* | TPM4    | 0.48  |
| hsa-mir-199a* | TRPC6   | 0.27  |
| hsa-mir-199a* | TSPAN7  | -0.43 |
| hsa-mir-199a* | TTYH1   | -0.45 |
| hsa-mir-199a* | TUBB2B  | -0.31 |
| hsa-mir-199a* | TWIST1  | 0.45  |
| hsa-mir-199a* | VDR     | 0.46  |
| hsa-mir-199a* | VEGFC   | 0.42  |
| hsa-mir-199a* | WISP1   | 0.4   |
| hsa-mir-199a* | ZNF711  | -0.19 |
| hsa-mir-199a* | ZP1     | 0.3   |
| hsa-mir-199b  | ABCA3   | -0.31 |
| hsa-mir-199b  | AGT     | -0.31 |
| hsa-mir-199b  | ALDH1A3 | 0.38  |
| hsa-mir-199b  | ANTXR2  | 0.37  |
| hsa-mir-199b  | AREG    | 0.3   |
| hsa-mir-199b  | ASAM    | 0.41  |
| hsa-mir-199b  | ASPN    | 0.43  |
| hsa-mir-199b  | CD248   | 0.42  |
| hsa-mir-199b  | CKB     | -0.4  |
| hsa-mir-199b  | COL11A1 | 0.36  |
| hsa-mir-199b  | COL12A1 | 0.55  |
| hsa-mir-199b  | COL15A1 | 0.48  |
| hsa-mir-199b  | COL1A1  | 0.5   |
| hsa-mir-199b  | COL1A2  | 0.57  |
| hsa-mir-199b  | COL3A1  | 0.5   |
| hsa-mir-199b  | COL5A1  | 0.49  |
| hsa-mir-199b  | COL5A2  | 0.45  |
| hsa-mir-199b  | COL6A2  | 0.49  |
| hsa-mir-199b  | COL6A3  | 0.58  |
| hsa-mir-199b  | CRABP2  | 0.44  |
| hsa-mir-199b  | CRIP1   | 0.36  |
| hsa-mir-199b  | CTHRC1  | 0.51  |
| hsa-mir-199b  | CTSK    | 0.4   |
| hsa-mir-199b  | CYP1B1  | 0.31  |
| hsa-mir-199b  | DCN     | 0.48  |



|              |           |       |
|--------------|-----------|-------|
| hsa-mir-199b | EGFR      | -0.2  |
| hsa-mir-199b | ENPP1     | 0.42  |
| hsa-mir-199b | FAM26E    | 0.46  |
| hsa-mir-199b | FAP       | 0.4   |
| hsa-mir-199b | FBLN1     | 0.46  |
| hsa-mir-199b | FBLN2     | 0.37  |
| hsa-mir-199b | FKBP7     | 0.54  |
| hsa-mir-199b | FLJ20489  | -0.34 |
| hsa-mir-199b | GALR1     | -0.03 |
| hsa-mir-199b | GATA6     | 0.39  |
| hsa-mir-199b | GLT8D2    | 0.53  |
| hsa-mir-199b | GLT8D4    | 0.31  |
| hsa-mir-199b | GPR124    | 0.48  |
| hsa-mir-199b | HMGA2     | 0.21  |
| hsa-mir-199b | HPR       | -0.14 |
| hsa-mir-199b | HTRA3     | 0.43  |
| hsa-mir-199b | INHBA     | 0.4   |
| hsa-mir-199b | ISLR      | 0.41  |
| hsa-mir-199b | ITGA11    | 0.38  |
| hsa-mir-199b | ITGB3     | 0.24  |
| hsa-mir-199b | ITGBL1    | 0.45  |
| hsa-mir-199b | KDEL3     | 0.39  |
| hsa-mir-199b | LAMB1     | 0.45  |
| hsa-mir-199b | LEPRE1    | 0.49  |
| hsa-mir-199b | LOC202459 | 0.34  |
| hsa-mir-199b | LOC493869 | 0.28  |
| hsa-mir-199b | LUM       | 0.52  |
| hsa-mir-199b | MESDC1    | 0.3   |
| hsa-mir-199b | MFAP2     | 0.5   |
| hsa-mir-199b | MME       | 0.37  |
| hsa-mir-199b | MMP1      | 0.34  |
| hsa-mir-199b | MMP11     | 0.5   |
| hsa-mir-199b | MMP13     | 0.49  |
| hsa-mir-199b | MXRA5     | 0.43  |
| hsa-mir-199b | MYO1B     | 0.41  |
| hsa-mir-199b | NID2      | 0.43  |
| hsa-mir-199b | OGN       | 0.37  |
| hsa-mir-199b | PCOLCE    | 0.53  |
| hsa-mir-199b | PDGFRB    | 0.39  |
| hsa-mir-199b | PMAIP1    | 0.31  |
| hsa-mir-199b | POSTN     | 0.31  |
| hsa-mir-199b | PPP2R2B   | -0.32 |
| hsa-mir-199b | PRRX2     | 0.39  |
| hsa-mir-199b | PTGER2    | 0.38  |
| hsa-mir-199b | PTGIS     | 0.4   |
| hsa-mir-199b | PTPRF     | -0.28 |
| hsa-mir-199b | RDH11     | -0.24 |
| hsa-mir-199b | RNF128    | 0.29  |
| hsa-mir-199b | SEC24D    | 0.41  |
| hsa-mir-199b | SNAI2     | 0.47  |
| hsa-mir-199b | SPON2     | 0.41  |
| hsa-mir-199b | STRA6     | 0.42  |
| hsa-mir-199b | SVIL      | 0.41  |

|              |             |       |
|--------------|-------------|-------|
| hsa-mir-199b | TBC1D8B     | 0.39  |
| hsa-mir-199b | THBS1       | 0.36  |
| hsa-mir-199b | TMEM166     | 0.33  |
| hsa-mir-199b | TMEM16A     | 0.43  |
| hsa-mir-199b | TNMD        | 0.29  |
| hsa-mir-199b | TPBG        | 0.36  |
| hsa-mir-199b | UGDH        | 0.37  |
| hsa-mir-199b | VDR         | 0.3   |
| hsa-mir-199b | ZNF469      | 0.27  |
| hsa-mir-19a  | AADACL1     | -0.44 |
| hsa-mir-19a  | ALDH1L1     | -0.39 |
| hsa-mir-19a  | APBB1IP     | -0.33 |
| hsa-mir-19a  | ASPM        | 0.48  |
| hsa-mir-19a  | ATAD5       | 0.5   |
| hsa-mir-19a  | ATP8B4      | -0.29 |
| hsa-mir-19a  | BHLHB3      | -0.41 |
| hsa-mir-19a  | BUB1B       | 0.45  |
| hsa-mir-19a  | C10orf107   | -0.34 |
| hsa-mir-19a  | C11orf82    | 0.37  |
| hsa-mir-19a  | C14orf45    | -0.3  |
| hsa-mir-19a  | C15orf42    | 0.49  |
| hsa-mir-19a  | C4orf34     | -0.26 |
| hsa-mir-19a  | CASC5       | 0.4   |
| hsa-mir-19a  | CCDC14      | 0.28  |
| hsa-mir-19a  | CCDC65      | -0.21 |
| hsa-mir-19a  | CDC45L      | 0.45  |
| hsa-mir-19a  | CDCA4       | 0.35  |
| hsa-mir-19a  | CDKN3       | 0.31  |
| hsa-mir-19a  | CENPE       | 0.41  |
| hsa-mir-19a  | CENPF       | 0.48  |
| hsa-mir-19a  | CENPJ       | 0.44  |
| hsa-mir-19a  | CFHR3       | -0.28 |
| hsa-mir-19a  | CHD7        | 0.43  |
| hsa-mir-19a  | CHI3L2      | -0.27 |
| hsa-mir-19a  | CHML        | 0.35  |
| hsa-mir-19a  | CHPT1       | -0.38 |
| hsa-mir-19a  | CHST6       | -0.31 |
| hsa-mir-19a  | CKMT2       | -0.36 |
| hsa-mir-19a  | CLU         | -0.44 |
| hsa-mir-19a  | CPE         | -0.33 |
| hsa-mir-19a  | CSF1R       | -0.31 |
| hsa-mir-19a  | CST3        | -0.39 |
| hsa-mir-19a  | CTSH        | -0.31 |
| hsa-mir-19a  | CXCL14      | -0.43 |
| hsa-mir-19a  | CYP1B1      | -0.31 |
| hsa-mir-19a  | DHX58       | -0.38 |
| hsa-mir-19a  | KFZp762E131 | 0.41  |
| hsa-mir-19a  | DNAJB9      | -0.32 |
| hsa-mir-19a  | DNMT3B      | 0.39  |
| hsa-mir-19a  | DTL         | 0.45  |
| hsa-mir-19a  | E2F1        | 0.37  |
| hsa-mir-19a  | E2F2        | 0.45  |
| hsa-mir-19a  | EPHX2       | -0.38 |

|             |         |       |
|-------------|---------|-------|
| hsa-mir-19a | EVI2B   | -0.35 |
| hsa-mir-19a | EXO1    | 0.43  |
| hsa-mir-19a | FAM60A  | 0.35  |
| hsa-mir-19a | FAM83D  | 0.4   |
| hsa-mir-19a | FANCA   | 0.39  |
| hsa-mir-19a | FANK1   | -0.35 |
| hsa-mir-19a | FEN1    | 0.39  |
| hsa-mir-19a | FGF1    | -0.41 |
| hsa-mir-19a | FMOD    | -0.3  |
| hsa-mir-19a | GATM    | -0.31 |
| hsa-mir-19a | GJA1    | -0.41 |
| hsa-mir-19a | GLUL    | -0.35 |
| hsa-mir-19a | GMPR    | -0.31 |
| hsa-mir-19a | GPR37   | -0.35 |
| hsa-mir-19a | GRAMD3  | -0.3  |
| hsa-mir-19a | HMGB3   | 0.39  |
| hsa-mir-19a | HPR     | -0.3  |
| hsa-mir-19a | HSD11B1 | -0.42 |
| hsa-mir-19a | IGSF9   | 0.32  |
| hsa-mir-19a | INTS7   | 0.33  |
| hsa-mir-19a | KIF2C   | 0.46  |
| hsa-mir-19a | KLHDC9  | -0.5  |
| hsa-mir-19a | LGI1    | -0.38 |
| hsa-mir-19a | LMNB1   | 0.39  |
| hsa-mir-19a | LMNB2   | 0.43  |
| hsa-mir-19a | LRRC2   | -0.28 |
| hsa-mir-19a | MAD2L1  | 0.39  |
| hsa-mir-19a | MAF     | -0.33 |
| hsa-mir-19a | MAOB    | -0.38 |
| hsa-mir-19a | MCM8    | 0.44  |
| hsa-mir-19a | MEOX2   | -0.2  |
| hsa-mir-19a | METTL7A | -0.35 |
| hsa-mir-19a | MEX3A   | 0.47  |
| hsa-mir-19a | MEX3B   | 0.41  |
| hsa-mir-19a | MORN2   | -0.27 |
| hsa-mir-19a | MOSC2   | -0.39 |
| hsa-mir-19a | MT1E    | -0.41 |
| hsa-mir-19a | MT1JP   | -0.43 |
| hsa-mir-19a | MT1M    | -0.44 |
| hsa-mir-19a | MTA2    | 0.23  |
| hsa-mir-19a | MYB     | 0.39  |
| hsa-mir-19a | MYBL2   | 0.41  |
| hsa-mir-19a | MYOHD1  | 0.38  |
| hsa-mir-19a | NCAPH   | 0.41  |
| hsa-mir-19a | NDC80   | 0.4   |
| hsa-mir-19a | OLR1    | -0.34 |
| hsa-mir-19a | ONECUT2 | 0.36  |
| hsa-mir-19a | OPLAH   | -0.36 |
| hsa-mir-19a | PGCP    | -0.41 |
| hsa-mir-19a | PLA2G5  | -0.44 |
| hsa-mir-19a | PLB1    | -0.37 |
| hsa-mir-19a | PLEKHK1 | 0.46  |
| hsa-mir-19a | PLK4    | 0.42  |

|             |              |       |
|-------------|--------------|-------|
| hsa-mir-19a | PMP22        | -0.41 |
| hsa-mir-19a | PNPLA4       | -0.36 |
| hsa-mir-19a | POLQ         | 0.44  |
| hsa-mir-19a | PON2         | -0.29 |
| hsa-mir-19a | PPP1CB       | -0.32 |
| hsa-mir-19a | PRC1         | 0.44  |
| hsa-mir-19a | RAB36        | -0.28 |
| hsa-mir-19a | RAD54L       | 0.44  |
| hsa-mir-19a | RALB         | -0.37 |
| hsa-mir-19a | RANBP3L      | -0.32 |
| hsa-mir-19a | RBKS         | -0.38 |
| hsa-mir-19a | RECQL4       | 0.4   |
| hsa-mir-19a | RGS6         | -0.3  |
| hsa-mir-19a | RILP         | -0.5  |
| hsa-mir-19a | ROM1         | -0.3  |
| hsa-mir-19a | RRM2B        | -0.38 |
| hsa-mir-19a | S100A13      | -0.36 |
| hsa-mir-19a | SLC13A3      | -0.38 |
| hsa-mir-19a | SLC1A3       | -0.4  |
| hsa-mir-19a | SLC4A4       | -0.33 |
| hsa-mir-19a | SLC7A11      | -0.29 |
| hsa-mir-19a | SMC3         | 0.45  |
| hsa-mir-19a | SMC6         | 0.36  |
| hsa-mir-19a | SNTA1        | -0.39 |
| hsa-mir-19a | SPAG5        | 0.46  |
| hsa-mir-19a | SSPN         | -0.36 |
| hsa-mir-19a | STOM         | -0.37 |
| hsa-mir-19a | TCTEX1D1     | -0.27 |
| hsa-mir-19a | TLR3         | -0.29 |
| hsa-mir-19a | TMEM50B      | -0.33 |
| hsa-mir-19a | TNFSF12      | -0.47 |
| hsa-mir-19a | TOP2A        | 0.44  |
| hsa-mir-19a | TPX2         | 0.43  |
| hsa-mir-19a | TRIM6-TRIM34 | -0.37 |
| hsa-mir-19a | TRPM2        | -0.38 |
| hsa-mir-19a | TUBB         | 0.33  |
| hsa-mir-19a | USP53        | -0.37 |
| hsa-mir-19a | WHSC1        | 0.36  |
| hsa-mir-19a | XAF1         | -0.31 |
| hsa-mir-19a | ZNF462       | 0.29  |
| hsa-mir-19a | ZWINT        | 0.48  |
| hsa-mir-19b | March2       | -0.43 |
| hsa-mir-19b | AADAACL1     | -0.48 |
| hsa-mir-19b | ACOT6        | -0.43 |
| hsa-mir-19b | ADRB2        | -0.38 |
| hsa-mir-19b | ALDH1L1      | -0.41 |
| hsa-mir-19b | ALOX5AP      | -0.38 |
| hsa-mir-19b | ANKRD35      | -0.3  |
| hsa-mir-19b | ANXA4        | -0.33 |
| hsa-mir-19b | ANXA5        | -0.18 |
| hsa-mir-19b | APBB1IP      | -0.35 |
| hsa-mir-19b | APOC2        | -0.28 |
| hsa-mir-19b | ASAH1        | -0.32 |

|             |           |       |
|-------------|-----------|-------|
| hsa-mir-19b | ASPM      | 0.51  |
| hsa-mir-19b | ATAD5     | 0.53  |
| hsa-mir-19b | ATP8B4    | -0.31 |
| hsa-mir-19b | BASP1     | 0.07  |
| hsa-mir-19b | BBOX1     | -0.38 |
| hsa-mir-19b | BDH2      | -0.38 |
| hsa-mir-19b | BHLHB3    | -0.44 |
| hsa-mir-19b | BIRC3     | -0.41 |
| hsa-mir-19b | BLVRB     | -0.45 |
| hsa-mir-19b | BOP1      | 0.37  |
| hsa-mir-19b | BUB1B     | 0.5   |
| hsa-mir-19b | C10orf107 | -0.37 |
| hsa-mir-19b | C10orf114 | -0.28 |
| hsa-mir-19b | C11orf82  | 0.43  |
| hsa-mir-19b | C13orf3   | 0.48  |
| hsa-mir-19b | C15orf42  | 0.53  |
| hsa-mir-19b | C16orf59  | 0.47  |
| hsa-mir-19b | C19orf57  | 0.44  |
| hsa-mir-19b | C1orf54   | -0.42 |
| hsa-mir-19b | C1orf88   | -0.37 |
| hsa-mir-19b | C4orf18   | -0.35 |
| hsa-mir-19b | C4orf34   | -0.32 |
| hsa-mir-19b | C5orf32   | -0.45 |
| hsa-mir-19b | C6orf167  | 0.44  |
| hsa-mir-19b | C6orf173  | 0.38  |
| hsa-mir-19b | C9orf125  | 0.13  |
| hsa-mir-19b | C9orf140  | 0.44  |
| hsa-mir-19b | C9orf95   | -0.32 |
| hsa-mir-19b | CAMK1     | -0.3  |
| hsa-mir-19b | CAMKV     | 0.09  |
| hsa-mir-19b | CASC5     | 0.44  |
| hsa-mir-19b | CCDC65    | -0.23 |
| hsa-mir-19b | CD53      | -0.34 |
| hsa-mir-19b | CDC25A    | 0.42  |
| hsa-mir-19b | CDC45L    | 0.5   |
| hsa-mir-19b | CDC7      | 0.4   |
| hsa-mir-19b | CDCA5     | 0.45  |
| hsa-mir-19b | CDCA8     | 0.45  |
| hsa-mir-19b | CDKN3     | 0.34  |
| hsa-mir-19b | CENPE     | 0.44  |
| hsa-mir-19b | CENPF     | 0.5   |
| hsa-mir-19b | CENPH     | 0.47  |
| hsa-mir-19b | CENPJ     | 0.48  |
| hsa-mir-19b | CFLAR     | -0.36 |
| hsa-mir-19b | CGNL1     | -0.38 |
| hsa-mir-19b | CHAF1A    | 0.43  |
| hsa-mir-19b | CHD7      | 0.45  |
| hsa-mir-19b | CHML      | 0.38  |
| hsa-mir-19b | CHPT1     | -0.39 |
| hsa-mir-19b | CHST6     | -0.35 |
| hsa-mir-19b | CHTF18    | 0.41  |
| hsa-mir-19b | CKAP2     | 0.44  |
| hsa-mir-19b | CKAP2L    | 0.45  |

|             |             |       |
|-------------|-------------|-------|
| hsa-mir-19b | CKMT2       | -0.37 |
| hsa-mir-19b | CKS2        | 0.35  |
| hsa-mir-19b | CLDN10      | -0.38 |
| hsa-mir-19b | CLGN        | 0.27  |
| hsa-mir-19b | CLSPN       | 0.42  |
| hsa-mir-19b | CLU         | -0.47 |
| hsa-mir-19b | COL9A1      | 0.27  |
| hsa-mir-19b | COPZ2       | -0.39 |
| hsa-mir-19b | CPE         | -0.36 |
| hsa-mir-19b | CSF1R       | -0.33 |
| hsa-mir-19b | CSRP1       | -0.48 |
| hsa-mir-19b | CSRP2       | -0.21 |
| hsa-mir-19b | CST3        | -0.42 |
| hsa-mir-19b | CTBS        | -0.36 |
| hsa-mir-19b | CTPS        | 0.44  |
| hsa-mir-19b | CX3CR1      | -0.32 |
| hsa-mir-19b | CXCL14      | -0.46 |
| hsa-mir-19b | CXorf57     | 0.09  |
| hsa-mir-19b | DDIT4L      | -0.43 |
| hsa-mir-19b | DENND3      | -0.35 |
| hsa-mir-19b | DEPDC1B     | 0.47  |
| hsa-mir-19b | DHX58       | -0.43 |
| hsa-mir-19b | DIAPH3      | 0.42  |
| hsa-mir-19b | KFZP586H212 | -0.41 |
| hsa-mir-19b | KFZp762E131 | 0.45  |
| hsa-mir-19b | DKK3        | -0.41 |
| hsa-mir-19b | DLG7        | 0.43  |
| hsa-mir-19b | DNA2L       | 0.44  |
| hsa-mir-19b | DNMT3B      | 0.41  |
| hsa-mir-19b | DOK6        | 0.17  |
| hsa-mir-19b | DTL         | 0.49  |
| hsa-mir-19b | DYNLRB2     | -0.34 |
| hsa-mir-19b | E2F1        | 0.4   |
| hsa-mir-19b | E2F2        | 0.48  |
| hsa-mir-19b | EBI2        | -0.26 |
| hsa-mir-19b | ECM2        | -0.29 |
| hsa-mir-19b | ELL2        | -0.35 |
| hsa-mir-19b | ELMOD1      | -0.3  |
| hsa-mir-19b | ENDOD1      | -0.42 |
| hsa-mir-19b | EPHX2       | -0.41 |
| hsa-mir-19b | EVI2B       | -0.37 |
| hsa-mir-19b | EXO1        | 0.48  |
| hsa-mir-19b | FAH         | -0.41 |
| hsa-mir-19b | FAM110A     | 0.43  |
| hsa-mir-19b | FAM57B      | 0.26  |
| hsa-mir-19b | FAM83D      | 0.43  |
| hsa-mir-19b | FANCA       | 0.44  |
| hsa-mir-19b | FANCC       | 0.48  |
| hsa-mir-19b | FANCE       | 0.42  |
| hsa-mir-19b | FANCG       | 0.48  |
| hsa-mir-19b | FANCI       | 0.45  |
| hsa-mir-19b | FANK1       | -0.37 |
| hsa-mir-19b | FBXO5       | 0.42  |

|             |           |       |
|-------------|-----------|-------|
| hsa-mir-19b | FEN1      | 0.4   |
| hsa-mir-19b | FGF1      | -0.44 |
| hsa-mir-19b | FLJ22795  | 0.3   |
| hsa-mir-19b | FLJ39660  | 0.39  |
| hsa-mir-19b | FMOD      | -0.32 |
| hsa-mir-19b | FOXM1     | 0.45  |
| hsa-mir-19b | GIMAP4    | -0.36 |
| hsa-mir-19b | GJA1      | -0.4  |
| hsa-mir-19b | GLCCI1    | 0.38  |
| hsa-mir-19b | GLUL      | -0.39 |
| hsa-mir-19b | GNG4      | 0.43  |
| hsa-mir-19b | GPR37     | -0.4  |
| hsa-mir-19b | GPR92     | -0.34 |
| hsa-mir-19b | GSG2      | 0.45  |
| hsa-mir-19b | GTSE1     | 0.48  |
| hsa-mir-19b | H2AFY2    | 0.26  |
| hsa-mir-19b | HELLS     | 0.47  |
| hsa-mir-19b | HERPUD1   | -0.42 |
| hsa-mir-19b | HLA-DMB   | -0.32 |
| hsa-mir-19b | HN1       | 0.43  |
| hsa-mir-19b | HOPX      | -0.34 |
| hsa-mir-19b | HPR       | -0.28 |
| hsa-mir-19b | HRASLS3   | -0.49 |
| hsa-mir-19b | HSD11B1   | -0.44 |
| hsa-mir-19b | HTRA1     | -0.36 |
| hsa-mir-19b | IGSF9     | 0.35  |
| hsa-mir-19b | IMPA2     | -0.22 |
| hsa-mir-19b | KIF11     | 0.5   |
| hsa-mir-19b | KIF14     | 0.48  |
| hsa-mir-19b | KIF15     | 0.48  |
| hsa-mir-19b | KIF2C     | 0.5   |
| hsa-mir-19b | KIFC1     | 0.5   |
| hsa-mir-19b | KLF12     | 0.4   |
| hsa-mir-19b | KLHDC9    | -0.51 |
| hsa-mir-19b | LGI1      | -0.41 |
| hsa-mir-19b | LGR6      | -0.3  |
| hsa-mir-19b | LILRA1    | -0.34 |
| hsa-mir-19b | LILRA2    | -0.36 |
| hsa-mir-19b | LIX1      | -0.3  |
| hsa-mir-19b | LMNB1     | 0.44  |
| hsa-mir-19b | LMNB2     | 0.46  |
| hsa-mir-19b | LOC493869 | -0.21 |
| hsa-mir-19b | LOC91431  | 0.44  |
| hsa-mir-19b | MAD2L1    | 0.44  |
| hsa-mir-19b | MAOB      | -0.43 |
| hsa-mir-19b | MAST1     | 0.18  |
| hsa-mir-19b | MCM10     | 0.48  |
| hsa-mir-19b | MCM3APAS  | 0.38  |
| hsa-mir-19b | MCM8      | 0.47  |
| hsa-mir-19b | MELK      | 0.41  |
| hsa-mir-19b | METTL7A   | -0.4  |
| hsa-mir-19b | MEX3A     | 0.52  |
| hsa-mir-19b | MEX3B     | 0.45  |

|             |          |       |
|-------------|----------|-------|
| hsa-mir-19b | MGST1    | -0.35 |
| hsa-mir-19b | MGST2    | -0.39 |
| hsa-mir-19b | MKI67    | 0.45  |
| hsa-mir-19b | MLC1     | -0.36 |
| hsa-mir-19b | MLF1IP   | 0.43  |
| hsa-mir-19b | MORN2    | -0.28 |
| hsa-mir-19b | MOSC2    | -0.4  |
| hsa-mir-19b | MRAS     | -0.46 |
| hsa-mir-19b | MT1E     | -0.42 |
| hsa-mir-19b | MT1JP    | -0.44 |
| hsa-mir-19b | MT1M     | -0.43 |
| hsa-mir-19b | MYB      | 0.42  |
| hsa-mir-19b | MYBL2    | 0.46  |
| hsa-mir-19b | NCAPH    | 0.46  |
| hsa-mir-19b | NDC80    | 0.44  |
| hsa-mir-19b | NDP      | -0.36 |
| hsa-mir-19b | NEIL3    | 0.43  |
| hsa-mir-19b | NEK2     | 0.39  |
| hsa-mir-19b | NLRP3    | -0.41 |
| hsa-mir-19b | NMI      | -0.25 |
| hsa-mir-19b | NR2E1    | -0.43 |
| hsa-mir-19b | NUDT13   | 0.06  |
| hsa-mir-19b | NUF2     | 0.43  |
| hsa-mir-19b | OLR1     | -0.36 |
| hsa-mir-19b | ONECUT2  | 0.4   |
| hsa-mir-19b | OPLAH    | -0.4  |
| hsa-mir-19b | OSTF1    | -0.4  |
| hsa-mir-19b | P2RY13   | -0.3  |
| hsa-mir-19b | P2RY5    | -0.28 |
| hsa-mir-19b | PAFAH1B3 | 0.42  |
| hsa-mir-19b | PGCP     | -0.42 |
| hsa-mir-19b | PIF1     | 0.42  |
| hsa-mir-19b | PLA2G5   | -0.47 |
| hsa-mir-19b | PLEKHK1  | 0.5   |
| hsa-mir-19b | PLK4     | 0.48  |
| hsa-mir-19b | PMP22    | -0.42 |
| hsa-mir-19b | PNPLA4   | -0.36 |
| hsa-mir-19b | POLG     | 0.51  |
| hsa-mir-19b | POLQ     | 0.48  |
| hsa-mir-19b | POU4F1   | 0.4   |
| hsa-mir-19b | PPCS     | -0.47 |
| hsa-mir-19b | PRAM1    | -0.33 |
| hsa-mir-19b | PRC1     | 0.47  |
| hsa-mir-19b | PRIM1    | 0.41  |
| hsa-mir-19b | RAD54L   | 0.48  |
| hsa-mir-19b | RAMP1    | -0.32 |
| hsa-mir-19b | RBKS     | -0.41 |
| hsa-mir-19b | RBPJ     | 0.35  |
| hsa-mir-19b | RECQL4   | 0.42  |
| hsa-mir-19b | REEP5    | -0.48 |
| hsa-mir-19b | RFC5     | 0.38  |
| hsa-mir-19b | RGS10    | -0.35 |
| hsa-mir-19b | RGS6     | -0.3  |



|              |              |       |
|--------------|--------------|-------|
| hsa-mir-19b  | RILP         | -0.52 |
| hsa-mir-19b  | ROM1         | -0.34 |
| hsa-mir-19b  | RRM2B        | -0.39 |
| hsa-mir-19b  | S100A13      | -0.39 |
| hsa-mir-19b  | S100A16      | -0.31 |
| hsa-mir-19b  | SAMD9L       | -0.32 |
| hsa-mir-19b  | SELPLG       | -0.4  |
| hsa-mir-19b  | SH3BGR       | -0.36 |
| hsa-mir-19b  | SH3BP4       | 0.43  |
| hsa-mir-19b  | SIRPA        | -0.45 |
| hsa-mir-19b  | SLA          | -0.41 |
| hsa-mir-19b  | SLC1A3       | -0.41 |
| hsa-mir-19b  | SLC25A18     | -0.38 |
| hsa-mir-19b  | SMC2         | 0.41  |
| hsa-mir-19b  | SMC3         | 0.46  |
| hsa-mir-19b  | SNTA1        | -0.41 |
| hsa-mir-19b  | SOX11        | 0.35  |
| hsa-mir-19b  | SOX4         | 0.46  |
| hsa-mir-19b  | SPAG5        | 0.51  |
| hsa-mir-19b  | SPC25        | 0.39  |
| hsa-mir-19b  | SPOCK2       | -0.33 |
| hsa-mir-19b  | SSPN         | -0.36 |
| hsa-mir-19b  | SYTL2        | -0.44 |
| hsa-mir-19b  | TAGAP        | -0.26 |
| hsa-mir-19b  | TIMELESS     | 0.44  |
| hsa-mir-19b  | TMBIM1       | -0.39 |
| hsa-mir-19b  | TMEM47       | -0.33 |
| hsa-mir-19b  | TMEM71       | -0.29 |
| hsa-mir-19b  | TMSL8        | 0.37  |
| hsa-mir-19b  | TNFSF12      | -0.51 |
| hsa-mir-19b  | TOP2A        | 0.48  |
| hsa-mir-19b  | TPX2         | 0.47  |
| hsa-mir-19b  | TRIM6-TRIM34 | -0.4  |
| hsa-mir-19b  | TROAP        | 0.48  |
| hsa-mir-19b  | TRPM2        | -0.41 |
| hsa-mir-19b  | TTK          | 0.44  |
| hsa-mir-19b  | TUBB         | 0.36  |
| hsa-mir-19b  | UBE2C        | 0.46  |
| hsa-mir-19b  | USP49        | 0.39  |
| hsa-mir-19b  | USP53        | -0.4  |
| hsa-mir-19b  | VAMP5        | -0.35 |
| hsa-mir-19b  | VNN2         | -0.34 |
| hsa-mir-19b  | XRCC2        | 0.44  |
| hsa-mir-19b  | ZNF286A      | 0.4   |
| hsa-mir-19b  | ZNF300       | 0.45  |
| hsa-mir-19b  | ZWINT        | 0.51  |
| hsa-mir-200a | CCDC11       | 0.27  |
| hsa-mir-200a | FLJ40298     | 0.35  |
| hsa-mir-200a | IL25         | 0.29  |
| hsa-mir-200a | INSL5        | 0.28  |
| hsa-mir-200a | LHFPL3       | -0.1  |
| hsa-mir-200a | MAGEC2       | -0.21 |
| hsa-mir-200a | MME          | -0.01 |

|               |           |       |
|---------------|-----------|-------|
| hsa-mir-200a  | MYCBPAP   | 0.3   |
| hsa-mir-200a  | S100A2    | 0.29  |
| hsa-mir-200a  | SPINK5    | -0.1  |
| hsa-mir-200a  | TP53TG3   | -0.06 |
| hsa-mir-200a  | TTC18     | 0.26  |
| hsa-mir-200a* | C9orf82   | -0.1  |
| hsa-mir-200a* | FA2H      | 0.13  |
| hsa-mir-200a* | FAM107B   | 0.13  |
| hsa-mir-200a* | FLJ45557  | -0.23 |
| hsa-mir-200a* | GRB10     | -0.29 |
| hsa-mir-200a* | KLK6      | 0.15  |
| hsa-mir-200a* | MMP10     | 0.16  |
| hsa-mir-200a* | MMP7      | 0.08  |
| hsa-mir-200a* | MOG       | 0.09  |
| hsa-mir-200a* | NOS2A     | -0.28 |
| hsa-mir-200a* | PTCHD1    | -0.09 |
| hsa-mir-200a* | SEC61G    | -0.05 |
| hsa-mir-200a* | SH3GL3    | 0.07  |
| hsa-mir-200a* | SLC10A4   | -0.07 |
| hsa-mir-200a* | SRPX      | -0.05 |
| hsa-mir-200a* | UGT8      | 0.14  |
| hsa-mir-200b  | COMP      | 0.21  |
| hsa-mir-200b  | DNAH9     | 0.19  |
| hsa-mir-200b  | HRK       | -0.03 |
| hsa-mir-200b  | LONRF3    | 0.09  |
| hsa-mir-200b  | MREG      | -0.05 |
| hsa-mir-200b  | MYCBPAP   | 0.25  |
| hsa-mir-200b  | VIT       | 0.14  |
| hsa-mir-200b  | ZNF521    | 0.12  |
| hsa-mir-200c  | KCNC1     | -0.11 |
| hsa-mir-200c  | LONRF3    | 0.24  |
| hsa-mir-200c  | UBTD1     | 0.22  |
| hsa-mir-200c  | UPP1      | 0.22  |
| hsa-mir-200c  | XKR6      | -0.28 |
| hsa-mir-200c  | ZNF251    | -0.18 |
| hsa-mir-202   | ADAM12    | 0.26  |
| hsa-mir-202   | ATP13A5   | -0.21 |
| hsa-mir-202   | B3GNT2    | 0.27  |
| hsa-mir-202   | BRD3      | -0.34 |
| hsa-mir-202   | C19orf6   | -0.3  |
| hsa-mir-202   | CCL26     | 0.32  |
| hsa-mir-202   | CCL7      | 0.26  |
| hsa-mir-202   | CSNK1E    | -0.34 |
| hsa-mir-202   | CST6      | 0.29  |
| hsa-mir-202   | EGFR      | 0.04  |
| hsa-mir-202   | FLJ22662  | 0.3   |
| hsa-mir-202   | GOLGA2LY1 | -0.25 |
| hsa-mir-202   | ITGA4     | 0.33  |
| hsa-mir-202   | KIAA0241  | 0.2   |
| hsa-mir-202   | LRRC8A    | -0.19 |
| hsa-mir-202   | MMD2      | -0.19 |
| hsa-mir-202   | OIT3      | 0.14  |
| hsa-mir-202   | PLXNB1    | -0.35 |

|             |           |       |
|-------------|-----------|-------|
| hsa-mir-202 | PRO0478   | -0.27 |
| hsa-mir-202 | RPL23AP13 | -0.27 |
| hsa-mir-202 | SFRS8     | -0.26 |
| hsa-mir-202 | TBC1D3P2  | -0.24 |
| hsa-mir-202 | VDR       | 0.3   |
| hsa-mir-202 | ZKSCAN1   | -0.22 |
| hsa-mir-202 | ZSCAN18   | -0.3  |
| hsa-mir-204 | ABCA12    | 0.08  |
| hsa-mir-204 | ACAN      | -0.25 |
| hsa-mir-204 | ACSL3     | 0.44  |
| hsa-mir-204 | ACTC1     | -0.17 |
| hsa-mir-204 | ADAMTS9   | 0.37  |
| hsa-mir-204 | AGR3      | 0.07  |
| hsa-mir-204 | AGT       | 0.29  |
| hsa-mir-204 | AIM2      | -0.3  |
| hsa-mir-204 | AKR1C3    | -0.08 |
| hsa-mir-204 | AKT3      | -0.35 |
| hsa-mir-204 | ALCAM     | -0.46 |
| hsa-mir-204 | ALDH7A1   | 0.28  |
| hsa-mir-204 | ALK       | 0.29  |
| hsa-mir-204 | AMOTL2    | -0.36 |
| hsa-mir-204 | AMT       | 0.25  |
| hsa-mir-204 | ANGPTL7   | -0.04 |
| hsa-mir-204 | ARHGAP28  | -0.35 |
| hsa-mir-204 | ARSJ      | 0.41  |
| hsa-mir-204 | ATP1A2    | 0.07  |
| hsa-mir-204 | ATP6V0A4  | -0.24 |
| hsa-mir-204 | ATP6V1E2  | -0.35 |
| hsa-mir-204 | B3GALT1   | 0.29  |
| hsa-mir-204 | BASP1     | -0.39 |
| hsa-mir-204 | BCAR3     | 0.26  |
| hsa-mir-204 | BCAS1     | -0.28 |
| hsa-mir-204 | BMI1      | -0.28 |
| hsa-mir-204 | BMPER     | -0.28 |
| hsa-mir-204 | BVES      | -0.3  |
| hsa-mir-204 | C1orf176  | -0.3  |
| hsa-mir-204 | C1orf59   | -0.13 |
| hsa-mir-204 | C1QL1     | -0.4  |
| hsa-mir-204 | C20orf42  | -0.35 |
| hsa-mir-204 | C6orf142  | -0.27 |
| hsa-mir-204 | C6orf15   | 0.36  |
| hsa-mir-204 | C6orf199  | -0.4  |
| hsa-mir-204 | C8orf4    | 0.28  |
| hsa-mir-204 | CADM3     | -0.43 |
| hsa-mir-204 | CAMK2D    | 0.35  |
| hsa-mir-204 | CAMP      | -0.27 |
| hsa-mir-204 | CCL19     | -0.29 |
| hsa-mir-204 | CD151     | 0.41  |
| hsa-mir-204 | CD38      | -0.17 |
| hsa-mir-204 | CDH18     | -0.16 |
| hsa-mir-204 | CDH3      | -0.25 |
| hsa-mir-204 | CDH4      | 0.3   |
| hsa-mir-204 | CDKN1C    | -0.22 |

|             |         |       |
|-------------|---------|-------|
| hsa-mir-204 | CDR1    | -0.4  |
| hsa-mir-204 | CENTD3  | 0.26  |
| hsa-mir-204 | CHODL   | 0.17  |
| hsa-mir-204 | CHRNA3  | -0.15 |
| hsa-mir-204 | CHRNA9  | 0.29  |
| hsa-mir-204 | CHST2   | 0.45  |
| hsa-mir-204 | CHST7   | 0.35  |
| hsa-mir-204 | CITED1  | 0.24  |
| hsa-mir-204 | CLCN2   | 0.14  |
| hsa-mir-204 | CLGN    | -0.38 |
| hsa-mir-204 | CLYBL   | 0.33  |
| hsa-mir-204 | CMTM5   | -0.33 |
| hsa-mir-204 | CNDP1   | -0.21 |
| hsa-mir-204 | CNIH3   | 0.39  |
| hsa-mir-204 | CNN1    | 0.21  |
| hsa-mir-204 | CNR1    | 0.17  |
| hsa-mir-204 | CNTNAP3 | 0.49  |
| hsa-mir-204 | COL11A1 | -0.36 |
| hsa-mir-204 | COL21A1 | -0.21 |
| hsa-mir-204 | CPNE4   | 0.45  |
| hsa-mir-204 | CPXM2   | -0.23 |
| hsa-mir-204 | CREB3L1 | 0.34  |
| hsa-mir-204 | CRIM1   | 0.38  |
| hsa-mir-204 | CRMP1   | -0.33 |
| hsa-mir-204 | CST3    | 0.35  |
| hsa-mir-204 | CXCL12  | -0.34 |
| hsa-mir-204 | CXorf57 | -0.22 |
| hsa-mir-204 | CXXC4   | -0.26 |
| hsa-mir-204 | DACH1   | -0.31 |
| hsa-mir-204 | DACH2   | -0.24 |
| hsa-mir-204 | DAPL1   | -0.31 |
| hsa-mir-204 | DARC    | -0.5  |
| hsa-mir-204 | DAZ4    | -0.19 |
| hsa-mir-204 | DBX2    | 0.3   |
| hsa-mir-204 | DCX     | -0.48 |
| hsa-mir-204 | DEPDC7  | -0.39 |
| hsa-mir-204 | DGKI    | -0.31 |
| hsa-mir-204 | DHCR7   | 0.3   |
| hsa-mir-204 | DLC1    | 0.39  |
| hsa-mir-204 | DLX6    | -0.27 |
| hsa-mir-204 | DNAH10  | -0.44 |
| hsa-mir-204 | DNER    | -0.38 |
| hsa-mir-204 | DNM3    | -0.45 |
| hsa-mir-204 | DOK6    | -0.19 |
| hsa-mir-204 | DPP4    | 0.38  |
| hsa-mir-204 | DSCAML1 | -0.34 |
| hsa-mir-204 | DSCR6   | 0.07  |
| hsa-mir-204 | DSCR8   | 0.32  |
| hsa-mir-204 | DUSP4   | 0.38  |
| hsa-mir-204 | DUSP6   | 0.39  |
| hsa-mir-204 | EBF3    | -0.42 |
| hsa-mir-204 | EDN2    | 0.04  |
| hsa-mir-204 | EGF     | 0.2   |

|             |          |       |
|-------------|----------|-------|
| hsa-mir-204 | EGFR     | 0.23  |
| hsa-mir-204 | ELOVL2   | 0.37  |
| hsa-mir-204 | ELSPBP1  | 0.07  |
| hsa-mir-204 | ENPP4    | -0.29 |
| hsa-mir-204 | EPHB1    | -0.42 |
| hsa-mir-204 | ERC2     | -0.28 |
| hsa-mir-204 | ETV4     | 0.42  |
| hsa-mir-204 | ETV5     | 0.5   |
| hsa-mir-204 | EVI2A    | -0.18 |
| hsa-mir-204 | EXTL3    | 0.41  |
| hsa-mir-204 | EYA4     | 0.42  |
| hsa-mir-204 | F3       | 0.1   |
| hsa-mir-204 | FA2H     | -0.29 |
| hsa-mir-204 | FABP7    | 0.38  |
| hsa-mir-204 | FAM107B  | -0.41 |
| hsa-mir-204 | FAM108C1 | 0.38  |
| hsa-mir-204 | FAM49B   | -0.27 |
| hsa-mir-204 | FAM55C   | -0.37 |
| hsa-mir-204 | FAM77C   | -0.35 |
| hsa-mir-204 | FAM84A   | 0.39  |
| hsa-mir-204 | FAM89A   | -0.37 |
| hsa-mir-204 | FGD3     | -0.32 |
| hsa-mir-204 | FGFRL1   | 0.41  |
| hsa-mir-204 | FGL1     | 0.14  |
| hsa-mir-204 | FLJ21963 | 0.51  |
| hsa-mir-204 | FLJ45557 | 0.33  |
| hsa-mir-204 | FOXC1    | 0.16  |
| hsa-mir-204 | FXD3     | 0.18  |
| hsa-mir-204 | FZD7     | 0.45  |
| hsa-mir-204 | GADD45G  | -0.39 |
| hsa-mir-204 | GAL      | 0.08  |
| hsa-mir-204 | GALNT13  | -0.41 |
| hsa-mir-204 | GAS2     | 0.02  |
| hsa-mir-204 | GBA3     | -0.04 |
| hsa-mir-204 | GBX2     | -0.26 |
| hsa-mir-204 | GDF15    | 0.33  |
| hsa-mir-204 | GLYATL2  | -0.24 |
| hsa-mir-204 | GNAS     | 0.36  |
| hsa-mir-204 | GNG7     | 0.31  |
| hsa-mir-204 | GPR128   | 0.2   |
| hsa-mir-204 | GPR17    | -0.44 |
| hsa-mir-204 | GPR23    | -0.39 |
| hsa-mir-204 | GPR64    | -0.15 |
| hsa-mir-204 | GPR85    | -0.37 |
| hsa-mir-204 | GRB10    | 0.4   |
| hsa-mir-204 | GRIK1    | 0.26  |
| hsa-mir-204 | HAND2    | -0.45 |
| hsa-mir-204 | HGD      | 0.3   |
| hsa-mir-204 | HKR1     | 0.15  |
| hsa-mir-204 | HOXD8    | -0.24 |
| hsa-mir-204 | HRASLS   | -0.19 |
| hsa-mir-204 | HS3ST3B1 | 0.42  |
| hsa-mir-204 | HSPA1A   | 0.06  |

|             |           |       |
|-------------|-----------|-------|
| hsa-mir-204 | HSPB3     | -0.29 |
| hsa-mir-204 | IGF2AS    | -0.19 |
| hsa-mir-204 | IGFBP1    | 0.32  |
| hsa-mir-204 | IPMK      | -0.34 |
| hsa-mir-204 | IRX2      | -0.18 |
| hsa-mir-204 | ITGA7     | 0.41  |
| hsa-mir-204 | KCND2     | -0.32 |
| hsa-mir-204 | KCNF1     | 0.46  |
| hsa-mir-204 | KCNH8     | -0.38 |
| hsa-mir-204 | KIAA1324L | -0.41 |
| hsa-mir-204 | KIAA1576  | -0.15 |
| hsa-mir-204 | KIAA1913  | -0.22 |
| hsa-mir-204 | KLF8      | -0.32 |
| hsa-mir-204 | KLHL29    | 0.32  |
| hsa-mir-204 | KLHL4     | 0.29  |
| hsa-mir-204 | KLRC1     | -0.31 |
| hsa-mir-204 | KLRC2     | -0.3  |
| hsa-mir-204 | KLRC3     | -0.32 |
| hsa-mir-204 | KRTAP6-3  | -0.26 |
| hsa-mir-204 | KY        | -0.31 |
| hsa-mir-204 | LAMA5     | 0.42  |
| hsa-mir-204 | LGALS12   | 0.09  |
| hsa-mir-204 | LGALS3    | 0.35  |
| hsa-mir-204 | LGR4      | 0.22  |
| hsa-mir-204 | LHFPL1    | -0.23 |
| hsa-mir-204 | LPHN2     | 0.31  |
| hsa-mir-204 | LRRC16    | 0.52  |
| hsa-mir-204 | LRRTM1    | -0.41 |
| hsa-mir-204 | LZTS1     | 0.33  |
| hsa-mir-204 | MAB21L1   | 0.21  |
| hsa-mir-204 | MAGEE2    | -0.29 |
| hsa-mir-204 | MAGEL2    | -0.31 |
| hsa-mir-204 | MARVELD2  | 0.28  |
| hsa-mir-204 | MEGF11    | -0.35 |
| hsa-mir-204 | METTL7B   | 0.41  |
| hsa-mir-204 | MEX3B     | -0.47 |
| hsa-mir-204 | MLZE      | -0.18 |
| hsa-mir-204 | MOXD1     | 0.29  |
| hsa-mir-204 | MPO       | -0.41 |
| hsa-mir-204 | MPP6      | 0.2   |
| hsa-mir-204 | MREG      | 0.28  |
| hsa-mir-204 | MT1M      | 0.31  |
| hsa-mir-204 | MTSS1     | -0.47 |
| hsa-mir-204 | MYOT      | -0.36 |
| hsa-mir-204 | MYT1      | -0.4  |
| hsa-mir-204 | NANOS1    | -0.44 |
| hsa-mir-204 | NBLA00301 | -0.41 |
| hsa-mir-204 | NCAM2     | -0.29 |
| hsa-mir-204 | NDN       | -0.19 |
| hsa-mir-204 | NDP       | 0.29  |
| hsa-mir-204 | NKX2-2    | -0.18 |
| hsa-mir-204 | NLRP8     | 0.27  |
| hsa-mir-204 | NOS2A     | 0.46  |

|             |              |       |
|-------------|--------------|-------|
| hsa-mir-204 | NPAS2        | 0.38  |
| hsa-mir-204 | NPNT         | 0.36  |
| hsa-mir-204 | NPPA         | -0.36 |
| hsa-mir-204 | NPY2R        | 0.32  |
| hsa-mir-204 | NR0B1        | -0.37 |
| hsa-mir-204 | NR2E1        | 0.31  |
| hsa-mir-204 | NXN          | -0.45 |
| hsa-mir-204 | OCIAD2       | 0.2   |
| hsa-mir-204 | OR4N2        | -0.28 |
| hsa-mir-204 | OSBPL6       | 0.35  |
| hsa-mir-204 | OSR1         | -0.31 |
| hsa-mir-204 | OTX1         | 0.36  |
| hsa-mir-204 | OVOS2        | -0.4  |
| hsa-mir-204 | PAK7         | -0.43 |
| hsa-mir-204 | PDGFA        | 0.38  |
| hsa-mir-204 | PDGFRA       | -0.27 |
| hsa-mir-204 | PELI1        | -0.43 |
| hsa-mir-204 | PFN2         | -0.4  |
| hsa-mir-204 | PHACTR3      | -0.49 |
| hsa-mir-204 | PIK3R3       | -0.44 |
| hsa-mir-204 | PIPOX        | 0.42  |
| hsa-mir-204 | PLA2G2A      | 0.1   |
| hsa-mir-204 | PLA2G5       | 0.3   |
| hsa-mir-204 | PLAC8        | 0.09  |
| hsa-mir-204 | PLCG1        | 0.29  |
| hsa-mir-204 | PODN         | -0.34 |
| hsa-mir-204 | POSTN        | 0.32  |
| hsa-mir-204 | POU4F1       | -0.35 |
| hsa-mir-204 | PPAPDC1A     | -0.16 |
| hsa-mir-204 | PRDM13       | 0.1   |
| hsa-mir-204 | PRPH         | -0.32 |
| hsa-mir-204 | PRR7         | 0.41  |
| hsa-mir-204 | PTGS1        | 0.37  |
| hsa-mir-204 | PTPRO        | -0.34 |
| hsa-mir-204 | RAB33A       | -0.43 |
| hsa-mir-204 | RAB34        | 0.49  |
| hsa-mir-204 | RAB3C        | -0.41 |
| hsa-mir-204 | RAB9B        | -0.53 |
| hsa-mir-204 | RANBP17      | -0.23 |
| hsa-mir-204 | RAP2A        | -0.39 |
| hsa-mir-204 | RASEF        | 0.3   |
| hsa-mir-204 | REG1B        | 0.28  |
| hsa-mir-204 | REPS2        | -0.41 |
| hsa-mir-204 | RGAG4        | 0.22  |
| hsa-mir-204 | RGS20        | 0.33  |
| hsa-mir-204 | RGS6         | 0.33  |
| hsa-mir-204 | RHOJ         | 0.34  |
| hsa-mir-204 | RIN1         | 0.48  |
| hsa-mir-204 | RNF144A      | -0.42 |
| hsa-mir-204 | RNF150       | -0.39 |
| hsa-mir-204 | RNF182       | -0.11 |
| hsa-mir-204 | RP11-35N6.1  | -0.38 |
| hsa-mir-204 | RP13-102H20. | -0.05 |

|             |              |       |
|-------------|--------------|-------|
| hsa-mir-204 | RP5-1054A22. | -0.32 |
| hsa-mir-204 | RPRM         | -0.25 |
| hsa-mir-204 | RYR3         | 0.31  |
| hsa-mir-204 | SCG2         | 0.38  |
| hsa-mir-204 | SCN3A        | -0.46 |
| hsa-mir-204 | SCRN1        | 0.3   |
| hsa-mir-204 | SEC61G       | 0.28  |
| hsa-mir-204 | SEMA3A       | 0.12  |
| hsa-mir-204 | SERP1        | -0.29 |
| hsa-mir-204 | SGCD         | -0.16 |
| hsa-mir-204 | SGCE         | -0.01 |
| hsa-mir-204 | SGK3         | -0.35 |
| hsa-mir-204 | SH3GL2       | -0.29 |
| hsa-mir-204 | SHD          | -0.41 |
| hsa-mir-204 | SHROOM3      | 0.45  |
| hsa-mir-204 | SLC16A7      | -0.41 |
| hsa-mir-204 | SLC22A18     | 0.44  |
| hsa-mir-204 | SLC22A3      | -0.28 |
| hsa-mir-204 | SLC27A1      | 0.38  |
| hsa-mir-204 | SLC4A4       | 0.36  |
| hsa-mir-204 | SLC8A3       | -0.45 |
| hsa-mir-204 | SLCO6A1      | 0.24  |
| hsa-mir-204 | SLITRK4      | -0.09 |
| hsa-mir-204 | SORCS3       | -0.44 |
| hsa-mir-204 | SOX9         | 0.39  |
| hsa-mir-204 | SP8          | 0.15  |
| hsa-mir-204 | SPATA22      | -0.22 |
| hsa-mir-204 | SPRY1        | 0.33  |
| hsa-mir-204 | SPRY2        | 0.5   |
| hsa-mir-204 | SPRY4        | 0.38  |
| hsa-mir-204 | SRPX         | 0.36  |
| hsa-mir-204 | SUSD4        | -0.34 |
| hsa-mir-204 | SUSD5        | -0.37 |
| hsa-mir-204 | TBX21        | -0.42 |
| hsa-mir-204 | TBX5         | -0.38 |
| hsa-mir-204 | TCEAL2       | -0.29 |
| hsa-mir-204 | TEKT2        | 0.1   |
| hsa-mir-204 | TFCP2L1      | 0.23  |
| hsa-mir-204 | THEM4        | -0.13 |
| hsa-mir-204 | TKTL2        | -0.4  |
| hsa-mir-204 | TLE1         | 0.37  |
| hsa-mir-204 | TLE6         | 0.18  |
| hsa-mir-204 | TMEFF2       | -0.36 |
| hsa-mir-204 | TMEM158      | 0.37  |
| hsa-mir-204 | TMEM163      | -0.36 |
| hsa-mir-204 | TMEM35       | -0.42 |
| hsa-mir-204 | TMEM98       | -0.29 |
| hsa-mir-204 | TMSL8        | -0.32 |
| hsa-mir-204 | TNS3         | -0.28 |
| hsa-mir-204 | TOX          | 0.12  |
| hsa-mir-204 | TOX3         | -0.42 |
| hsa-mir-204 | TP53TG3      | -0.08 |
| hsa-mir-204 | TRPM3        | 0.54  |



|             |          |       |
|-------------|----------|-------|
| hsa-mir-204 | UBE2E2   | -0.32 |
| hsa-mir-204 | UGT8     | -0.41 |
| hsa-mir-204 | UNQ6975  | -0.4  |
| hsa-mir-204 | UST      | -0.34 |
| hsa-mir-204 | VAV3     | 0.39  |
| hsa-mir-204 | VAX2     | -0.33 |
| hsa-mir-204 | VIPR2    | -0.41 |
| hsa-mir-204 | WASF1    | -0.33 |
| hsa-mir-204 | WISP1    | 0.09  |
| hsa-mir-204 | WWC3     | -0.16 |
| hsa-mir-204 | YAP1     | 0.41  |
| hsa-mir-204 | ZAR1     | 0.17  |
| hsa-mir-204 | ZDHHC23  | 0.38  |
| hsa-mir-204 | ZFPM2    | -0.38 |
| hsa-mir-204 | ZIC2     | 0.35  |
| hsa-mir-204 | ZNF124   | -0.37 |
| hsa-mir-204 | ZNF179   | -0.29 |
| hsa-mir-204 | ZNF469   | -0.3  |
| hsa-mir-204 | ZNF642   | -0.36 |
| hsa-mir-205 | C11orf1  | 0.18  |
| hsa-mir-205 | C1orf110 | 0.07  |
| hsa-mir-205 | C1orf87  | 0.07  |
| hsa-mir-205 | MORN2    | 0.11  |
| hsa-mir-20a | AADACL1  | -0.54 |
| hsa-mir-20a | ALDH1A1  | -0.38 |
| hsa-mir-20a | AMPD3    | -0.41 |
| hsa-mir-20a | AQP9     | -0.34 |
| hsa-mir-20a | ASPM     | 0.5   |
| hsa-mir-20a | ATAD5    | 0.53  |
| hsa-mir-20a | BUB1B    | 0.47  |
| hsa-mir-20a | C10orf59 | -0.34 |
| hsa-mir-20a | C13orf24 | 0.21  |
| hsa-mir-20a | C13orf3  | 0.53  |
| hsa-mir-20a | C15orf42 | 0.52  |
| hsa-mir-20a | C16orf59 | 0.48  |
| hsa-mir-20a | C19orf57 | 0.47  |
| hsa-mir-20a | C4orf18  | -0.36 |
| hsa-mir-20a | CBR1     | -0.39 |
| hsa-mir-20a | CCNB2    | 0.46  |
| hsa-mir-20a | CDC25C   | 0.47  |
| hsa-mir-20a | CDC45L   | 0.5   |
| hsa-mir-20a | CDC6     | 0.46  |
| hsa-mir-20a | CDCA8    | 0.44  |
| hsa-mir-20a | CENPH    | 0.5   |
| hsa-mir-20a | CENPJ    | 0.46  |
| hsa-mir-20a | CENPK    | 0.4   |
| hsa-mir-20a | CEP192   | 0.4   |
| hsa-mir-20a | CHD7     | 0.49  |
| hsa-mir-20a | CHPT1    | -0.38 |
| hsa-mir-20a | CREBL2   | -0.45 |
| hsa-mir-20a | CSRP1    | -0.5  |
| hsa-mir-20a | CTSH     | -0.34 |
| hsa-mir-20a | CYP2J2   | -0.32 |

|             |             |       |
|-------------|-------------|-------|
| hsa-mir-20a | DCDC2       | -0.27 |
| hsa-mir-20a | DDIT4L      | -0.37 |
| hsa-mir-20a | DEPDC1B     | 0.5   |
| hsa-mir-20a | KFZP586H212 | -0.39 |
| hsa-mir-20a | KFZp762E131 | 0.46  |
| hsa-mir-20a | DKK3        | -0.43 |
| hsa-mir-20a | DLG7        | 0.45  |
| hsa-mir-20a | DOK6        | 0.04  |
| hsa-mir-20a | DOT1L       | 0.36  |
| hsa-mir-20a | DYNLT3      | -0.44 |
| hsa-mir-20a | E2F1        | 0.35  |
| hsa-mir-20a | E2F2        | 0.48  |
| hsa-mir-20a | EAF2        | -0.39 |
| hsa-mir-20a | ELL2        | -0.3  |
| hsa-mir-20a | ENDOD1      | -0.4  |
| hsa-mir-20a | EPDR1       | -0.35 |
| hsa-mir-20a | ETV1        | 0.39  |
| hsa-mir-20a | FAM62C      | -0.22 |
| hsa-mir-20a | FAM64A      | 0.52  |
| hsa-mir-20a | FAM79A      | -0.51 |
| hsa-mir-20a | FAM83D      | 0.41  |
| hsa-mir-20a | FANCG       | 0.48  |
| hsa-mir-20a | FBXO6       | -0.39 |
| hsa-mir-20a | FEN1        | 0.34  |
| hsa-mir-20a | FTH1        | -0.37 |
| hsa-mir-20a | FTHL17      | -0.38 |
| hsa-mir-20a | GJA1        | -0.3  |
| hsa-mir-20a | GNG4        | 0.45  |
| hsa-mir-20a | GPR37       | -0.33 |
| hsa-mir-20a | HIST1H3J    | 0.48  |
| hsa-mir-20a | HOXD3       | 0.42  |
| hsa-mir-20a | HRASLS3     | -0.47 |
| hsa-mir-20a | HSD11B1     | -0.48 |
| hsa-mir-20a | IGSF9       | 0.33  |
| hsa-mir-20a | KIAA1199    | -0.39 |
| hsa-mir-20a | KIF15       | 0.54  |
| hsa-mir-20a | KIF2C       | 0.49  |
| hsa-mir-20a | KLHDC9      | -0.38 |
| hsa-mir-20a | LGI1        | -0.33 |
| hsa-mir-20a | LMNB1       | 0.43  |
| hsa-mir-20a | LMNB2       | 0.45  |
| hsa-mir-20a | LOC400590   | 0.38  |
| hsa-mir-20a | LRRC2       | -0.26 |
| hsa-mir-20a | MAF         | -0.36 |
| hsa-mir-20a | MAOB        | -0.32 |
| hsa-mir-20a | MCM8        | 0.44  |
| hsa-mir-20a | MEX3A       | 0.58  |
| hsa-mir-20a | MGC45438    | -0.39 |
| hsa-mir-20a | MLC1        | -0.25 |
| hsa-mir-20a | MOXD1       | -0.3  |
| hsa-mir-20a | MT1E        | -0.45 |
| hsa-mir-20a | MT1M        | -0.45 |
| hsa-mir-20a | MT2A        | -0.35 |

|             |           |       |
|-------------|-----------|-------|
| hsa-mir-20a | NEIL3     | 0.45  |
| hsa-mir-20a | NEUROD4   | 0.33  |
| hsa-mir-20a | NIPSNAP3A | -0.24 |
| hsa-mir-20a | ODC1      | 0.48  |
| hsa-mir-20a | ONECUT2   | 0.39  |
| hsa-mir-20a | PAFAH1B3  | 0.43  |
| hsa-mir-20a | PIK3IP1   | -0.32 |
| hsa-mir-20a | PLEKHK1   | 0.46  |
| hsa-mir-20a | PNPLA4    | -0.38 |
| hsa-mir-20a | PPCS      | -0.47 |
| hsa-mir-20a | PRNP      | -0.51 |
| hsa-mir-20a | PSAP      | -0.3  |
| hsa-mir-20a | PTPLAD2   | -0.36 |
| hsa-mir-20a | RFC3      | 0.5   |
| hsa-mir-20a | RILP      | -0.49 |
| hsa-mir-20a | SAA1      | -0.22 |
| hsa-mir-20a | SALL3     | 0.35  |
| hsa-mir-20a | SIRPA     | -0.41 |
| hsa-mir-20a | SIX1      | 0.34  |
| hsa-mir-20a | SLC25A18  | -0.3  |
| hsa-mir-20a | SLC7A8    | -0.47 |
| hsa-mir-20a | SNTA1     | -0.39 |
| hsa-mir-20a | SOX4      | 0.52  |
| hsa-mir-20a | SPAG5     | 0.46  |
| hsa-mir-20a | SPP1      | -0.2  |
| hsa-mir-20a | TCF3      | 0.51  |
| hsa-mir-20a | TIMELESS  | 0.45  |
| hsa-mir-20a | TLR4      | -0.37 |
| hsa-mir-20a | TMEM144   | -0.37 |
| hsa-mir-20a | TMEM156   | -0.18 |
| hsa-mir-20a | TNFAIP8L3 | -0.35 |
| hsa-mir-20a | TOP2A     | 0.49  |
| hsa-mir-20a | TPX2      | 0.49  |
| hsa-mir-20a | TRIP13    | 0.38  |
| hsa-mir-20a | TROAP     | 0.45  |
| hsa-mir-20b | AADAACL1  | -0.5  |
| hsa-mir-20b | ALMS1     | 0.31  |
| hsa-mir-20b | ASPM      | 0.45  |
| hsa-mir-20b | ATAD5     | 0.5   |
| hsa-mir-20b | BIRC3     | -0.39 |
| hsa-mir-20b | BUB1B     | 0.42  |
| hsa-mir-20b | C13orf3   | 0.47  |
| hsa-mir-20b | C15orf42  | 0.46  |
| hsa-mir-20b | C5orf32   | -0.44 |
| hsa-mir-20b | C6orf167  | 0.42  |
| hsa-mir-20b | CDC25C    | 0.43  |
| hsa-mir-20b | CDC45L    | 0.46  |
| hsa-mir-20b | CDC6      | 0.38  |
| hsa-mir-20b | CDCA2     | 0.34  |
| hsa-mir-20b | CDCA8     | 0.4   |
| hsa-mir-20b | CDK8      | 0.36  |
| hsa-mir-20b | CENPE     | 0.39  |
| hsa-mir-20b | CENPF     | 0.44  |

|             |          |       |
|-------------|----------|-------|
| hsa-mir-20b | CENPH    | 0.46  |
| hsa-mir-20b | CEP192   | 0.38  |
| hsa-mir-20b | CHD7     | 0.5   |
| hsa-mir-20b | CHPT1    | -0.36 |
| hsa-mir-20b | CSRP1    | -0.45 |
| hsa-mir-20b | DEPDC1B  | 0.46  |
| hsa-mir-20b | DNMT1    | 0.42  |
| hsa-mir-20b | DOK6     | 0.12  |
| hsa-mir-20b | DTL      | 0.47  |
| hsa-mir-20b | E2F2     | 0.45  |
| hsa-mir-20b | ENDOD1   | -0.41 |
| hsa-mir-20b | EZH2     | 0.46  |
| hsa-mir-20b | FAM83D   | 0.35  |
| hsa-mir-20b | FOXM1    | 0.38  |
| hsa-mir-20b | GINS3    | 0.45  |
| hsa-mir-20b | GLCCI1   | 0.44  |
| hsa-mir-20b | GPR37    | -0.29 |
| hsa-mir-20b | KIF14    | 0.41  |
| hsa-mir-20b | KIF15    | 0.49  |
| hsa-mir-20b | KIF2C    | 0.44  |
| hsa-mir-20b | LGI1     | -0.23 |
| hsa-mir-20b | LOC91431 | 0.43  |
| hsa-mir-20b | MCM3APAS | 0.38  |
| hsa-mir-20b | MEX3A    | 0.58  |
| hsa-mir-20b | MEX3B    | 0.4   |
| hsa-mir-20b | MKRN3    | 0.44  |
| hsa-mir-20b | MSH6     | 0.35  |
| hsa-mir-20b | MT1E     | -0.41 |
| hsa-mir-20b | MYCN     | 0.49  |
| hsa-mir-20b | NCAPG2   | 0.37  |
| hsa-mir-20b | NEIL3    | 0.4   |
| hsa-mir-20b | NUSAP1   | 0.43  |
| hsa-mir-20b | ODC1     | 0.42  |
| hsa-mir-20b | PLEKHK1  | 0.44  |
| hsa-mir-20b | PLK4     | 0.4   |
| hsa-mir-20b | POLG     | 0.47  |
| hsa-mir-20b | PRC1     | 0.42  |
| hsa-mir-20b | RFC5     | 0.39  |
| hsa-mir-20b | RILP     | -0.44 |
| hsa-mir-20b | RRM2     | 0.35  |
| hsa-mir-20b | SALL3    | 0.37  |
| hsa-mir-20b | SHD      | 0.44  |
| hsa-mir-20b | SOX11    | 0.45  |
| hsa-mir-20b | SOX4     | 0.53  |
| hsa-mir-20b | SPAG5    | 0.43  |
| hsa-mir-20b | SPOCK2   | -0.36 |
| hsa-mir-20b | TACC1    | -0.38 |
| hsa-mir-20b | TMSL8    | 0.38  |
| hsa-mir-20b | TNFSF12  | -0.46 |
| hsa-mir-20b | TOP2A    | 0.46  |
| hsa-mir-20b | TPX2     | 0.43  |
| hsa-mir-20b | TROAP    | 0.41  |
| hsa-mir-20b | XRCC2    | 0.44  |

|             |          |       |
|-------------|----------|-------|
| hsa-mir-20b | YBX1     | 0.41  |
| hsa-mir-20b | ZNF300   | 0.5   |
| hsa-mir-20b | ZNF676   | 0.34  |
| hsa-mir-21  | Sept3    | -0.54 |
| hsa-mir-21  | AADACL1  | -0.12 |
| hsa-mir-21  | ABCA1    | 0.54  |
| hsa-mir-21  | ABCC3    | 0.66  |
| hsa-mir-21  | ABHD5    | 0.43  |
| hsa-mir-21  | ACPP     | 0.49  |
| hsa-mir-21  | ACTN1    | 0.42  |
| hsa-mir-21  | ADAM11   | -0.63 |
| hsa-mir-21  | ADAM12   | 0.64  |
| hsa-mir-21  | ADAM8    | 0.53  |
| hsa-mir-21  | ADAM9    | 0.55  |
| hsa-mir-21  | ADFP     | 0.47  |
| hsa-mir-21  | ADM      | 0.5   |
| hsa-mir-21  | ADRBK2   | -0.26 |
| hsa-mir-21  | AGXT2L1  | -0.49 |
| hsa-mir-21  | AHR      | 0.39  |
| hsa-mir-21  | AHRR     | -0.12 |
| hsa-mir-21  | AIFM3    | -0.46 |
| hsa-mir-21  | AIM1     | 0.56  |
| hsa-mir-21  | AJAP1    | -0.5  |
| hsa-mir-21  | AKR1B10  | 0.34  |
| hsa-mir-21  | ALDOC    | -0.52 |
| hsa-mir-21  | ANKRD13B | -0.39 |
| hsa-mir-21  | ANKRD46  | -0.59 |
| hsa-mir-21  | ANXA1    | 0.64  |
| hsa-mir-21  | ANXA11   | -0.05 |
| hsa-mir-21  | ANXA2    | 0.71  |
| hsa-mir-21  | AP3M2    | -0.43 |
| hsa-mir-21  | APH1B    | 0.55  |
| hsa-mir-21  | APOBEC3C | 0.61  |
| hsa-mir-21  | APOBEC3F | 0.6   |
| hsa-mir-21  | AQP9     | 0.37  |
| hsa-mir-21  | ARHGAP30 | 0.57  |
| hsa-mir-21  | ARID5A   | 0.5   |
| hsa-mir-21  | ARNT2    | -0.47 |
| hsa-mir-21  | ARPP-21  | -0.53 |
| hsa-mir-21  | ATF3     | 0.49  |
| hsa-mir-21  | ATP6V0A1 | -0.51 |
| hsa-mir-21  | ATP6V0E1 | 0.57  |
| hsa-mir-21  | B3GALT2  | -0.47 |
| hsa-mir-21  | BACE2    | 0.52  |
| hsa-mir-21  | BATF     | 0.58  |
| hsa-mir-21  | BCAT1    | 0.48  |
| hsa-mir-21  | BCL2A1   | 0.48  |
| hsa-mir-21  | BCL2L12  | 0.52  |
| hsa-mir-21  | BCL3     | 0.62  |
| hsa-mir-21  | BCR      | -0.37 |
| hsa-mir-21  | BDKRB2   | 0.44  |
| hsa-mir-21  | BEX2     | -0.56 |
| hsa-mir-21  | BEX5     | -0.39 |

|            |           |       |
|------------|-----------|-------|
| hsa-mir-21 | BFSP1     | -0.09 |
| hsa-mir-21 | BIRC3     | 0.38  |
| hsa-mir-21 | BRSK2     | -0.62 |
| hsa-mir-21 | BSN       | -0.57 |
| hsa-mir-21 | BST1      | 0.52  |
| hsa-mir-21 | BZRAP1    | -0.54 |
| hsa-mir-21 | C10orf111 | -0.48 |
| hsa-mir-21 | C10orf35  | -0.33 |
| hsa-mir-21 | C10orf38  | -0.57 |
| hsa-mir-21 | C10orf81  | 0.39  |
| hsa-mir-21 | C15orf17  | -0.2  |
| hsa-mir-21 | C15orf48  | 0.52  |
| hsa-mir-21 | C19orf59  | 0.46  |
| hsa-mir-21 | C1orf115  | -0.56 |
| hsa-mir-21 | C1orf216  | -0.51 |
| hsa-mir-21 | C1orf34   | 0.36  |
| hsa-mir-21 | C1orf96   | -0.55 |
| hsa-mir-21 | C1QTNF6   | 0.42  |
| hsa-mir-21 | C1RL      | 0.56  |
| hsa-mir-21 | C1S       | 0.56  |
| hsa-mir-21 | C2        | 0.43  |
| hsa-mir-21 | C20orf177 | -0.54 |
| hsa-mir-21 | C2orf12   | 0.52  |
| hsa-mir-21 | C2orf32   | -0.52 |
| hsa-mir-21 | C4orf6    | 0.44  |
| hsa-mir-21 | C6orf105  | -0.12 |
| hsa-mir-21 | C6orf141  | 0.37  |
| hsa-mir-21 | C6orf57   | 0.08  |
| hsa-mir-21 | C8orf4    | 0.47  |
| hsa-mir-21 | C8orf47   | -0.25 |
| hsa-mir-21 | C9orf125  | -0.45 |
| hsa-mir-21 | C9orf165  | -0.5  |
| hsa-mir-21 | CA12      | 0.63  |
| hsa-mir-21 | CACNA2D4  | 0.52  |
| hsa-mir-21 | CALU      | 0.56  |
| hsa-mir-21 | CAMK2G    | -0.6  |
| hsa-mir-21 | CAMSAP1L1 | -0.51 |
| hsa-mir-21 | CAMTA1    | -0.52 |
| hsa-mir-21 | CAP2      | -0.38 |
| hsa-mir-21 | CAPG      | 0.53  |
| hsa-mir-21 | CASP1     | 0.54  |
| hsa-mir-21 | CASP7     | 0.51  |
| hsa-mir-21 | CAST      | 0.62  |
| hsa-mir-21 | CATSPER1  | 0.59  |
| hsa-mir-21 | CAV1      | 0.55  |
| hsa-mir-21 | CBS       | -0.28 |
| hsa-mir-21 | CCDC76    | 0.06  |
| hsa-mir-21 | CCL20     | 0.41  |
| hsa-mir-21 | CCL26     | 0.48  |
| hsa-mir-21 | CD200     | -0.54 |
| hsa-mir-21 | CD300A    | 0.47  |
| hsa-mir-21 | CD44      | 0.7   |
| hsa-mir-21 | CD63      | 0.53  |

|            |         |       |
|------------|---------|-------|
| hsa-mir-21 | CD72    | 0.52  |
| hsa-mir-21 | CDCA7   | 0.11  |
| hsa-mir-21 | CDCP1   | 0.59  |
| hsa-mir-21 | CDH8    | -0.56 |
| hsa-mir-21 | CDH9    | -0.6  |
| hsa-mir-21 | CDKN2C  | 0.12  |
| hsa-mir-21 | CEBPB   | 0.52  |
| hsa-mir-21 | CEBPD   | 0.57  |
| hsa-mir-21 | CEBPE   | 0.56  |
| hsa-mir-21 | CFI     | 0.71  |
| hsa-mir-21 | CHD4    | -0.03 |
| hsa-mir-21 | CHI3L2  | 0.46  |
| hsa-mir-21 | CHSY1   | 0.47  |
| hsa-mir-21 | CKB     | -0.48 |
| hsa-mir-21 | CKMT1A  | -0.56 |
| hsa-mir-21 | CLASP2  | -0.54 |
| hsa-mir-21 | CLCF1   | 0.6   |
| hsa-mir-21 | CLDN23  | 0.54  |
| hsa-mir-21 | CLECL1  | 0.46  |
| hsa-mir-21 | CLIP3   | -0.39 |
| hsa-mir-21 | CMTM4   | -0.57 |
| hsa-mir-21 | CNTN3   | -0.54 |
| hsa-mir-21 | CNTNAP2 | -0.5  |
| hsa-mir-21 | COL1A1  | 0.56  |
| hsa-mir-21 | COL4A1  | 0.57  |
| hsa-mir-21 | COL5A1  | 0.49  |
| hsa-mir-21 | COL5A2  | 0.55  |
| hsa-mir-21 | COL8A1  | 0.58  |
| hsa-mir-21 | COQ2    | 0.38  |
| hsa-mir-21 | CP      | 0.52  |
| hsa-mir-21 | CPEB3   | -0.56 |
| hsa-mir-21 | CPLX1   | -0.59 |
| hsa-mir-21 | CPLX2   | -0.56 |
| hsa-mir-21 | CRLF1   | -0.35 |
| hsa-mir-21 | CRTAC1  | -0.47 |
| hsa-mir-21 | CSDA    | 0.59  |
| hsa-mir-21 | CSNK1E  | -0.31 |
| hsa-mir-21 | CSPG5   | -0.36 |
| hsa-mir-21 | CSTA    | 0.64  |
| hsa-mir-21 | CTSB    | 0.49  |
| hsa-mir-21 | CTSC    | 0.55  |
| hsa-mir-21 | CTSS    | 0.45  |
| hsa-mir-21 | CTSZ    | 0.49  |
| hsa-mir-21 | CUTL2   | -0.58 |
| hsa-mir-21 | CXCR4   | 0.57  |
| hsa-mir-21 | CXorf38 | 0.53  |
| hsa-mir-21 | CYFIP2  | -0.53 |
| hsa-mir-21 | CYR61   | 0.45  |
| hsa-mir-21 | DAB2    | 0.48  |
| hsa-mir-21 | DACH2   | -0.52 |
| hsa-mir-21 | DACT3   | -0.54 |
| hsa-mir-21 | DAG1    | 0.14  |
| hsa-mir-21 | DCBLD2  | 0.58  |

|            |             |       |
|------------|-------------|-------|
| hsa-mir-21 | DDX25       | -0.46 |
| hsa-mir-21 | KFZP564J086 | 0.48  |
| hsa-mir-21 | DOK3        | 0.57  |
| hsa-mir-21 | DOK6        | -0.57 |
| hsa-mir-21 | DPH3        | 0.54  |
| hsa-mir-21 | DPP10       | -0.6  |
| hsa-mir-21 | DPY19L1     | 0.52  |
| hsa-mir-21 | DPYD        | 0.59  |
| hsa-mir-21 | DPYSL3      | 0.46  |
| hsa-mir-21 | DRAM        | 0.62  |
| hsa-mir-21 | DRD5        | -0.54 |
| hsa-mir-21 | DSE         | 0.57  |
| hsa-mir-21 | DTX3        | -0.32 |
| hsa-mir-21 | DTX3L       | 0.57  |
| hsa-mir-21 | DTYMK       | 0.42  |
| hsa-mir-21 | DUSP1       | 0.45  |
| hsa-mir-21 | DUSP8       | -0.61 |
| hsa-mir-21 | DYNLT3      | 0.23  |
| hsa-mir-21 | DYRK3       | 0.5   |
| hsa-mir-21 | ECGF1       | 0.54  |
| hsa-mir-21 | EEF1A2      | -0.38 |
| hsa-mir-21 | EFCBP2      | -0.62 |
| hsa-mir-21 | EFHA2       | -0.61 |
| hsa-mir-21 | EHD4        | 0.55  |
| hsa-mir-21 | EIF4A2      | -0.58 |
| hsa-mir-21 | EIF4E2      | 0.52  |
| hsa-mir-21 | ELAVL2      | -0.46 |
| hsa-mir-21 | ELK3        | 0.57  |
| hsa-mir-21 | ELMOD1      | 0.05  |
| hsa-mir-21 | EMILIN2     | 0.47  |
| hsa-mir-21 | EMP1        | 0.62  |
| hsa-mir-21 | EMP3        | 0.57  |
| hsa-mir-21 | EPB41L1     | -0.44 |
| hsa-mir-21 | EPHB6       | -0.51 |
| hsa-mir-21 | ESR1        | 0.16  |
| hsa-mir-21 | F13A1       | 0.52  |
| hsa-mir-21 | F2R         | 0.4   |
| hsa-mir-21 | FAM114A1    | 0.6   |
| hsa-mir-21 | FAM129A     | 0.56  |
| hsa-mir-21 | FAM19A1     | -0.54 |
| hsa-mir-21 | FAM19A5     | -0.46 |
| hsa-mir-21 | FAM20A      | 0.48  |
| hsa-mir-21 | FAM46A      | 0.53  |
| hsa-mir-21 | FAM57B      | -0.58 |
| hsa-mir-21 | FAM81A      | -0.48 |
| hsa-mir-21 | FBLN5       | 0.35  |
| hsa-mir-21 | FBXL16      | -0.55 |
| hsa-mir-21 | FBXL2       | -0.3  |
| hsa-mir-21 | FBXO32      | 0.48  |
| hsa-mir-21 | FBXW7       | -0.59 |
| hsa-mir-21 | FCGBP       | 0.66  |
| hsa-mir-21 | FCGR2B      | 0.56  |
| hsa-mir-21 | FDFT1       | -0.49 |



|            |           |       |
|------------|-----------|-------|
| hsa-mir-21 | FER1L3    | 0.69  |
| hsa-mir-21 | FGF12     | -0.44 |
| hsa-mir-21 | FGF13     | -0.45 |
| hsa-mir-21 | FGF9      | -0.53 |
| hsa-mir-21 | FGFR1OP   | 0.42  |
| hsa-mir-21 | FKBP11    | 0.51  |
| hsa-mir-21 | FKBP9     | 0.52  |
| hsa-mir-21 | FLJ10781  | -0.52 |
| hsa-mir-21 | FLJ20273  | 0.66  |
| hsa-mir-21 | FLJ22662  | 0.49  |
| hsa-mir-21 | FLJ42953  | -0.39 |
| hsa-mir-21 | FLNA      | 0.51  |
| hsa-mir-21 | FNDC3B    | 0.64  |
| hsa-mir-21 | FOSL2     | 0.53  |
| hsa-mir-21 | FPRL2     | 0.51  |
| hsa-mir-21 | FRY       | -0.51 |
| hsa-mir-21 | FUCA2     | 0.54  |
| hsa-mir-21 | FUS       | -0.15 |
| hsa-mir-21 | FUT9      | -0.46 |
| hsa-mir-21 | GABARAPL3 | -0.47 |
| hsa-mir-21 | GABBR1    | -0.57 |
| hsa-mir-21 | GABRB3    | -0.51 |
| hsa-mir-21 | GABRG1    | -0.57 |
| hsa-mir-21 | GALNT10   | 0.59  |
| hsa-mir-21 | GAP43     | 0.17  |
| hsa-mir-21 | GBP2      | 0.59  |
| hsa-mir-21 | GBP5      | 0.53  |
| hsa-mir-21 | GCNT1     | 0.43  |
| hsa-mir-21 | GDA       | -0.44 |
| hsa-mir-21 | GEM       | 0.49  |
| hsa-mir-21 | GFOD1     | -0.51 |
| hsa-mir-21 | GFPT2     | 0.36  |
| hsa-mir-21 | GLRB      | -0.4  |
| hsa-mir-21 | GLT25D1   | 0.57  |
| hsa-mir-21 | GNAZ      | -0.52 |
| hsa-mir-21 | GNG12     | 0.45  |
| hsa-mir-21 | GNS       | 0.59  |
| hsa-mir-21 | GPR22     | -0.53 |
| hsa-mir-21 | GPR84     | 0.47  |
| hsa-mir-21 | GPRASP1   | -0.38 |
| hsa-mir-21 | GPRASP2   | -0.47 |
| hsa-mir-21 | GRIA2     | -0.4  |
| hsa-mir-21 | GRM7      | -0.52 |
| hsa-mir-21 | GRN       | 0.49  |
| hsa-mir-21 | HDGFRP3   | -0.57 |
| hsa-mir-21 | HEBP2     | 0.45  |
| hsa-mir-21 | HECW1     | -0.56 |
| hsa-mir-21 | HES6      | -0.27 |
| hsa-mir-21 | HIST1H4C  | -0.28 |
| hsa-mir-21 | HMGCS1    | -0.4  |
| hsa-mir-21 | HMOX1     | 0.49  |
| hsa-mir-21 | HOXB4     | 0.36  |
| hsa-mir-21 | HPS3      | 0.52  |

|            |          |       |
|------------|----------|-------|
| hsa-mir-21 | HRH1     | 0.5   |
| hsa-mir-21 | HSPA6    | 0.57  |
| hsa-mir-21 | HTR2A    | -0.5  |
| hsa-mir-21 | HTR7     | -0.05 |
| hsa-mir-21 | HYAL3    | -0.1  |
| hsa-mir-21 | IBSP     | 0.52  |
| hsa-mir-21 | ICAM1    | 0.54  |
| hsa-mir-21 | IDI1     | -0.53 |
| hsa-mir-21 | IDS      | 0.08  |
| hsa-mir-21 | IFI30    | 0.6   |
| hsa-mir-21 | IFNAR1   | 0.47  |
| hsa-mir-21 | IGF2BP3  | 0.31  |
| hsa-mir-21 | IGFBP2   | 0.41  |
| hsa-mir-21 | IGSF21   | -0.35 |
| hsa-mir-21 | IKIP     | 0.64  |
| hsa-mir-21 | IL13RA1  | 0.56  |
| hsa-mir-21 | IL17D    | -0.41 |
| hsa-mir-21 | IL1R1    | 0.44  |
| hsa-mir-21 | IL1R2    | 0.47  |
| hsa-mir-21 | IL1RAP   | 0.47  |
| hsa-mir-21 | IL1RN    | 0.38  |
| hsa-mir-21 | IL2RA    | 0.56  |
| hsa-mir-21 | IL4I1    | 0.5   |
| hsa-mir-21 | IL6      | 0.38  |
| hsa-mir-21 | INA      | -0.55 |
| hsa-mir-21 | INPP1    | -0.52 |
| hsa-mir-21 | IQGAP1   | 0.65  |
| hsa-mir-21 | IQWD1    | -0.16 |
| hsa-mir-21 | IRF1     | 0.41  |
| hsa-mir-21 | ISG20    | 0.57  |
| hsa-mir-21 | ITGA4    | 0.55  |
| hsa-mir-21 | ITGA5    | 0.56  |
| hsa-mir-21 | ITGB3    | 0.48  |
| hsa-mir-21 | ITK      | 0.39  |
| hsa-mir-21 | ITPR1    | -0.16 |
| hsa-mir-21 | JAKMIP1  | -0.51 |
| hsa-mir-21 | JUNB     | 0.41  |
| hsa-mir-21 | KBTBD6   | -0.39 |
| hsa-mir-21 | KCNB1    | -0.52 |
| hsa-mir-21 | KCNB2    | -0.58 |
| hsa-mir-21 | KCNK1    | -0.46 |
| hsa-mir-21 | KCNN1    | -0.62 |
| hsa-mir-21 | KCTD1    | -0.56 |
| hsa-mir-21 | KDELC2   | 0.54  |
| hsa-mir-21 | KDELR2   | 0.59  |
| hsa-mir-21 | KHDRBS2  | -0.62 |
| hsa-mir-21 | KIAA0984 | -0.37 |
| hsa-mir-21 | KIAA1045 | -0.46 |
| hsa-mir-21 | KIAA1086 | -0.52 |
| hsa-mir-21 | KIAA1239 | -0.56 |
| hsa-mir-21 | KIAA1737 | -0.48 |
| hsa-mir-21 | KIAA1949 | 0.64  |
| hsa-mir-21 | KIF3A    | -0.55 |

|            |           |       |
|------------|-----------|-------|
| hsa-mir-21 | KIF5A     | -0.5  |
| hsa-mir-21 | KIRREL3   | -0.48 |
| hsa-mir-21 | KLHDC3    | -0.51 |
| hsa-mir-21 | KLHL2     | -0.29 |
| hsa-mir-21 | LAMA4     | 0.48  |
| hsa-mir-21 | LAMB1     | 0.59  |
| hsa-mir-21 | LAMC1     | 0.56  |
| hsa-mir-21 | LAMP3     | 0.44  |
| hsa-mir-21 | LDHD      | -0.31 |
| hsa-mir-21 | LEPRE1    | 0.55  |
| hsa-mir-21 | LGALS1    | 0.58  |
| hsa-mir-21 | LGALS3    | 0.54  |
| hsa-mir-21 | LGALS8    | 0.21  |
| hsa-mir-21 | LIF       | 0.49  |
| hsa-mir-21 | LILRB3    | 0.6   |
| hsa-mir-21 | LIMA1     | 0.34  |
| hsa-mir-21 | LINGO1    | -0.53 |
| hsa-mir-21 | LMAN1     | 0.55  |
| hsa-mir-21 | LMO7      | -0.47 |
| hsa-mir-21 | LOC221091 | 0.57  |
| hsa-mir-21 | LOC26010  | 0.42  |
| hsa-mir-21 | LOC440356 | -0.12 |
| hsa-mir-21 | LOC493869 | 0.6   |
| hsa-mir-21 | LOC541471 | 0.48  |
| hsa-mir-21 | LOH11CR2A | 0.46  |
| hsa-mir-21 | LOX       | 0.56  |
| hsa-mir-21 | LOXL2     | 0.6   |
| hsa-mir-21 | LOXL3     | 0.58  |
| hsa-mir-21 | LRIG3     | 0.32  |
| hsa-mir-21 | LRRC25    | 0.52  |
| hsa-mir-21 | LRRC49    | -0.42 |
| hsa-mir-21 | LSM8      | 0.53  |
| hsa-mir-21 | LY96      | 0.55  |
| hsa-mir-21 | MACROD2   | -0.49 |
| hsa-mir-21 | MAGEE1    | -0.52 |
| hsa-mir-21 | MAGI1     | -0.5  |
| hsa-mir-21 | MAN2B1    | 0.56  |
| hsa-mir-21 | MAP3K8    | 0.48  |
| hsa-mir-21 | MAST1     | -0.59 |
| hsa-mir-21 | MBOAT1    | 0.4   |
| hsa-mir-21 | MCL1      | 0.54  |
| hsa-mir-21 | MDH1      | -0.47 |
| hsa-mir-21 | MDK       | 0.52  |
| hsa-mir-21 | METRNL    | 0.52  |
| hsa-mir-21 | MEX3A     | -0.05 |
| hsa-mir-21 | MFSD1     | 0.52  |
| hsa-mir-21 | MGAT4C    | -0.41 |
| hsa-mir-21 | MKL2      | -0.22 |
| hsa-mir-21 | MMAA      | 0.58  |
| hsa-mir-21 | MMP19     | 0.57  |
| hsa-mir-21 | MMP7      | 0.57  |
| hsa-mir-21 | MMP9      | 0.46  |
| hsa-mir-21 | MOAP1     | -0.56 |

|            |        |       |
|------------|--------|-------|
| hsa-mir-21 | MRCL3  | 0.57  |
| hsa-mir-21 | MREG   | 0.46  |
| hsa-mir-21 | MS4A4A | 0.51  |
| hsa-mir-21 | MS4A6A | 0.56  |
| hsa-mir-21 | MSN    | 0.59  |
| hsa-mir-21 | MSR1   | 0.54  |
| hsa-mir-21 | MST150 | 0.62  |
| hsa-mir-21 | MVP    | 0.58  |
| hsa-mir-21 | MYBPH  | 0.43  |
| hsa-mir-21 | MYT1L  | -0.56 |
| hsa-mir-21 | NAGA   | 0.58  |
| hsa-mir-21 | NAP1L2 | -0.5  |
| hsa-mir-21 | NAP1L3 | -0.61 |
| hsa-mir-21 | NAP1L5 | -0.57 |
| hsa-mir-21 | NASP   | 0.02  |
| hsa-mir-21 | NBEA   | -0.54 |
| hsa-mir-21 | NBL1   | -0.27 |
| hsa-mir-21 | NDRG2  | -0.52 |
| hsa-mir-21 | NDRG3  | -0.56 |
| hsa-mir-21 | NDRG4  | -0.43 |
| hsa-mir-21 | NEK10  | 0     |
| hsa-mir-21 | NEK6   | 0.49  |
| hsa-mir-21 | NES    | 0.31  |
| hsa-mir-21 | NET1   | -0.52 |
| hsa-mir-21 | NFKBIZ | 0.46  |
| hsa-mir-21 | NMI    | 0.48  |
| hsa-mir-21 | NMT2   | -0.47 |
| hsa-mir-21 | NNMT   | 0.55  |
| hsa-mir-21 | NOD2   | 0.57  |
| hsa-mir-21 | NOS3   | -0.46 |
| hsa-mir-21 | NOV    | 0.03  |
| hsa-mir-21 | NPM2   | -0.58 |
| hsa-mir-21 | NRP1   | 0.56  |
| hsa-mir-21 | NRP2   | 0.52  |
| hsa-mir-21 | NRXN1  | -0.47 |
| hsa-mir-21 | NSUN6  | -0.46 |
| hsa-mir-21 | NTNG2  | -0.46 |
| hsa-mir-21 | NUDT10 | -0.36 |
| hsa-mir-21 | NUDT11 | -0.5  |
| hsa-mir-21 | NUDT14 | -0.17 |
| hsa-mir-21 | NUP107 | 0.07  |
| hsa-mir-21 | NUP37  | 0.46  |
| hsa-mir-21 | OSMR   | 0.55  |
| hsa-mir-21 | P4HA1  | 0.49  |
| hsa-mir-21 | P4HA2  | 0.43  |
| hsa-mir-21 | P4HA3  | 0.54  |
| hsa-mir-21 | P4HB   | 0.51  |
| hsa-mir-21 | PAH    | -0.3  |
| hsa-mir-21 | PALLD  | 0.5   |
| hsa-mir-21 | PAOX   | -0.15 |
| hsa-mir-21 | PARP12 | 0.33  |
| hsa-mir-21 | PBEF1  | 0.58  |
| hsa-mir-21 | PDE2A  | -0.6  |

|            |         |       |
|------------|---------|-------|
| hsa-mir-21 | PDIA4   | 0.59  |
| hsa-mir-21 | PDK3    | 0.44  |
| hsa-mir-21 | PDPN    | 0.57  |
| hsa-mir-21 | PDZRN4  | -0.4  |
| hsa-mir-21 | PERQ1   | -0.09 |
| hsa-mir-21 | PGM2    | 0.47  |
| hsa-mir-21 | PGM2L1  | 0.11  |
| hsa-mir-21 | PHF17   | -0.37 |
| hsa-mir-21 | PHGDH   | -0.42 |
| hsa-mir-21 | PI4K2B  | 0.49  |
| hsa-mir-21 | PI4KA   | -0.6  |
| hsa-mir-21 | PIP3-E  | -0.52 |
| hsa-mir-21 | PLA2G2A | 0.36  |
| hsa-mir-21 | PLAT    | 0.38  |
| hsa-mir-21 | PLAU    | 0.6   |
| hsa-mir-21 | PLAUR   | 0.55  |
| hsa-mir-21 | PLEK2   | 0.59  |
| hsa-mir-21 | PLEKHA4 | 0.46  |
| hsa-mir-21 | PLEKHG2 | 0.51  |
| hsa-mir-21 | PLEKHG5 | -0.27 |
| hsa-mir-21 | PLOD1   | 0.45  |
| hsa-mir-21 | PLOD2   | 0.54  |
| hsa-mir-21 | PLOD3   | 0.56  |
| hsa-mir-21 | PLP2    | 0.58  |
| hsa-mir-21 | PLSCR1  | 0.46  |
| hsa-mir-21 | PLTP    | 0.53  |
| hsa-mir-21 | PLXNB1  | -0.31 |
| hsa-mir-21 | PNMA1   | -0.43 |
| hsa-mir-21 | PNMA3   | -0.56 |
| hsa-mir-21 | PNMA5   | -0.55 |
| hsa-mir-21 | POSTN   | 0.44  |
| hsa-mir-21 | PPFIA3  | -0.52 |
| hsa-mir-21 | PPP1R1A | -0.53 |
| hsa-mir-21 | PPP1R3B | 0.67  |
| hsa-mir-21 | PPP2R2C | -0.55 |
| hsa-mir-21 | PPP3CA  | -0.59 |
| hsa-mir-21 | PPP3CB  | -0.6  |
| hsa-mir-21 | PQLC3   | 0.5   |
| hsa-mir-21 | PRDX4   | 0.55  |
| hsa-mir-21 | PROS1   | 0.67  |
| hsa-mir-21 | PRRT1   | -0.62 |
| hsa-mir-21 | PRRT2   | -0.52 |
| hsa-mir-21 | PRSS16  | -0.29 |
| hsa-mir-21 | PRSS23  | 0.6   |
| hsa-mir-21 | PSCDBP  | 0.53  |
| hsa-mir-21 | PTBP2   | -0.55 |
| hsa-mir-21 | PTGER4  | 0.42  |
| hsa-mir-21 | PTOV1   | -0.29 |
| hsa-mir-21 | PTPN12  | 0.56  |
| hsa-mir-21 | PTPRT   | -0.54 |
| hsa-mir-21 | PTRF    | 0.54  |
| hsa-mir-21 | PTX3    | 0.58  |
| hsa-mir-21 | PYGL    | 0.65  |

|            |              |       |
|------------|--------------|-------|
| hsa-mir-21 | RAB20        | 0.52  |
| hsa-mir-21 | RAB27A       | 0.53  |
| hsa-mir-21 | RAB32        | 0.46  |
| hsa-mir-21 | RAB3A        | -0.56 |
| hsa-mir-21 | RAP1GAP      | -0.5  |
| hsa-mir-21 | RAPGEF4      | -0.55 |
| hsa-mir-21 | RARRES1      | 0.4   |
| hsa-mir-21 | RASL10A      | -0.55 |
| hsa-mir-21 | RBM5         | -0.18 |
| hsa-mir-21 | RBMS1        | 0.57  |
| hsa-mir-21 | RBP4         | -0.51 |
| hsa-mir-21 | RCAN1        | 0.47  |
| hsa-mir-21 | RCN1         | 0.5   |
| hsa-mir-21 | RDH10        | 0.56  |
| hsa-mir-21 | REEP1        | -0.47 |
| hsa-mir-21 | RELL1        | 0.46  |
| hsa-mir-21 | RETN         | 0.46  |
| hsa-mir-21 | REXO2        | 0.53  |
| hsa-mir-21 | RFESD        | 0.3   |
| hsa-mir-21 | RFTN1        | 0.32  |
| hsa-mir-21 | RGS7         | -0.51 |
| hsa-mir-21 | RGS7BP       | -0.46 |
| hsa-mir-21 | RHOH         | 0.46  |
| hsa-mir-21 | RLBP1L2      | -0.4  |
| hsa-mir-21 | RNASE2       | 0.56  |
| hsa-mir-21 | RP11-679B17. | -0.57 |
| hsa-mir-21 | RSPO2        | -0.34 |
| hsa-mir-21 | RTN4R        | -0.57 |
| hsa-mir-21 | RUFY3        | -0.42 |
| hsa-mir-21 | RUNDC3A      | -0.6  |
| hsa-mir-21 | RUNDC3B      | -0.49 |
| hsa-mir-21 | RUNX1        | 0.58  |
| hsa-mir-21 | S100A10      | 0.63  |
| hsa-mir-21 | S100A11      | 0.63  |
| hsa-mir-21 | S100A4       | 0.53  |
| hsa-mir-21 | S100A6       | 0.54  |
| hsa-mir-21 | S100A8       | 0.49  |
| hsa-mir-21 | S100A9       | 0.51  |
| hsa-mir-21 | SAA1         | 0.51  |
| hsa-mir-21 | SCAMP5       | -0.55 |
| hsa-mir-21 | SCARA5       | -0.38 |
| hsa-mir-21 | SCG3         | -0.46 |
| hsa-mir-21 | SCN2A        | -0.5  |
| hsa-mir-21 | SCPEP1       | 0.45  |
| hsa-mir-21 | SEC31B       | -0.36 |
| hsa-mir-21 | SERPINA3     | 0.51  |
| hsa-mir-21 | SERPINB1     | 0.51  |
| hsa-mir-21 | SERPINB8     | 0.5   |
| hsa-mir-21 | SERPINE1     | 0.55  |
| hsa-mir-21 | SERPINH1     | 0.51  |
| hsa-mir-21 | SFT2D2       | 0.63  |
| hsa-mir-21 | SGIP1        | -0.48 |
| hsa-mir-21 | SH2B3        | 0.51  |

|            |          |       |
|------------|----------|-------|
| hsa-mir-21 | SH3BGRL2 | -0.54 |
| hsa-mir-21 | SH3GL3   | -0.51 |
| hsa-mir-21 | SH3GLB1  | 0.56  |
| hsa-mir-21 | SHC1     | 0.55  |
| hsa-mir-21 | SIGLEC7  | 0.56  |
| hsa-mir-21 | SIGLEC9  | 0.56  |
| hsa-mir-21 | SLC12A5  | -0.52 |
| hsa-mir-21 | SLC16A3  | 0.54  |
| hsa-mir-21 | SLC24A5  | -0.51 |
| hsa-mir-21 | SLC25A27 | -0.52 |
| hsa-mir-21 | SLC25A41 | -0.54 |
| hsa-mir-21 | SLC26A10 | -0.11 |
| hsa-mir-21 | SLC30A3  | -0.56 |
| hsa-mir-21 | SLC35D1  | 0.57  |
| hsa-mir-21 | SLC39A1  | 0.36  |
| hsa-mir-21 | SLC39A10 | -0.54 |
| hsa-mir-21 | SLC7A7   | 0.55  |
| hsa-mir-21 | SLCO1A2  | -0.51 |
| hsa-mir-21 | SLIT3    | -0.09 |
| hsa-mir-21 | SLITRK5  | -0.38 |
| hsa-mir-21 | SLPI     | 0.39  |
| hsa-mir-21 | SNAI1    | 0.43  |
| hsa-mir-21 | SNAP91   | -0.57 |
| hsa-mir-21 | SOAT1    | 0.6   |
| hsa-mir-21 | SOCS3    | 0.65  |
| hsa-mir-21 | SOD2     | 0.58  |
| hsa-mir-21 | SOX2     | -0.05 |
| hsa-mir-21 | SPAG4    | 0.43  |
| hsa-mir-21 | SPARC    | 0.61  |
| hsa-mir-21 | SPHK1    | 0.41  |
| hsa-mir-21 | SPOCD1   | 0.67  |
| hsa-mir-21 | SPP1     | 0.5   |
| hsa-mir-21 | SPPL2A   | 0.51  |
| hsa-mir-21 | SRD5A1   | 0.49  |
| hsa-mir-21 | SRGN     | 0.43  |
| hsa-mir-21 | SRPX     | 0.5   |
| hsa-mir-21 | SRPX2    | 0.7   |
| hsa-mir-21 | SSTR1    | -0.59 |
| hsa-mir-21 | ST14     | 0.47  |
| hsa-mir-21 | ST6GAL2  | -0.46 |
| hsa-mir-21 | STAB1    | 0.54  |
| hsa-mir-21 | STAG2    | 0.02  |
| hsa-mir-21 | STAT4    | -0.22 |
| hsa-mir-21 | STEAP3   | 0.58  |
| hsa-mir-21 | STK32C   | -0.55 |
| hsa-mir-21 | STON1    | 0.4   |
| hsa-mir-21 | SUMF1    | 0.56  |
| hsa-mir-21 | SYNGR3   | -0.52 |
| hsa-mir-21 | SYP      | -0.58 |
| hsa-mir-21 | TCIRG1   | 0.55  |
| hsa-mir-21 | TCP11L1  | 0.25  |
| hsa-mir-21 | TEAD4    | 0.4   |
| hsa-mir-21 | TEX28    | 0.57  |

|            |           |       |
|------------|-----------|-------|
| hsa-mir-21 | TGFBI     | 0.63  |
| hsa-mir-21 | THBD      | 0.53  |
| hsa-mir-21 | THBS1     | 0.49  |
| hsa-mir-21 | THEX1     | 0.45  |
| hsa-mir-21 | THRA      | -0.54 |
| hsa-mir-21 | TIMP1     | 0.65  |
| hsa-mir-21 | TIMP2     | 0.59  |
| hsa-mir-21 | TMEM102   | 0.5   |
| hsa-mir-21 | TMEM155   | -0.54 |
| hsa-mir-21 | TMEM166   | 0.39  |
| hsa-mir-21 | TMEM16F   | 0.64  |
| hsa-mir-21 | TMEM24    | -0.46 |
| hsa-mir-21 | TMEM37    | 0.5   |
| hsa-mir-21 | TMEM45A   | 0.51  |
| hsa-mir-21 | TMEM59L   | -0.5  |
| hsa-mir-21 | TMEM70    | 0.12  |
| hsa-mir-21 | TMTC1     | 0.02  |
| hsa-mir-21 | TNC       | 0.6   |
| hsa-mir-21 | TNFAIP3   | 0.5   |
| hsa-mir-21 | TNFAIP8   | 0.51  |
| hsa-mir-21 | TNFRSF10B | 0.59  |
| hsa-mir-21 | TNFRSF12A | 0.63  |
| hsa-mir-21 | TNFRSF1A  | 0.61  |
| hsa-mir-21 | TP53I3    | 0.42  |
| hsa-mir-21 | TRAF4     | -0.01 |
| hsa-mir-21 | TREM1     | 0.66  |
| hsa-mir-21 | TRHDE     | -0.44 |
| hsa-mir-21 | TRPM8     | 0.51  |
| hsa-mir-21 | TSPAN7    | -0.49 |
| hsa-mir-21 | TSPYL4    | -0.57 |
| hsa-mir-21 | TUB       | -0.54 |
| hsa-mir-21 | TUBGCP6   | -0.33 |
| hsa-mir-21 | UBQLN4    | -0.3  |
| hsa-mir-21 | UNC13A    | -0.53 |
| hsa-mir-21 | UPP1      | 0.62  |
| hsa-mir-21 | USP11     | -0.53 |
| hsa-mir-21 | VAMP8     | 0.49  |
| hsa-mir-21 | VDR       | 0.53  |
| hsa-mir-21 | VEGFA     | 0.45  |
| hsa-mir-21 | VIM       | 0.62  |
| hsa-mir-21 | VIPR2     | -0.32 |
| hsa-mir-21 | VMO1      | 0.44  |
| hsa-mir-21 | VSNL1     | -0.4  |
| hsa-mir-21 | VSTM2A    | -0.29 |
| hsa-mir-21 | WDR47     | -0.58 |
| hsa-mir-21 | WIPF1     | 0.59  |
| hsa-mir-21 | WWTR1     | 0.68  |
| hsa-mir-21 | XK        | -0.37 |
| hsa-mir-21 | ZAK       | 0.56  |
| hsa-mir-21 | ZCCHC6    | 0.54  |
| hsa-mir-21 | ZFP36     | 0.42  |
| hsa-mir-21 | ZNF182    | -0.09 |
| hsa-mir-21 | ZNF238    | -0.45 |



|             |          |       |
|-------------|----------|-------|
| hsa-mir-21  | ZNF248   | -0.56 |
| hsa-mir-21  | ZNF25    | -0.48 |
| hsa-mir-21  | ZNF436   | 0.35  |
| hsa-mir-21  | ZNF480   | 0.55  |
| hsa-mir-21  | ZNF540   | -0.6  |
| hsa-mir-21  | ZNF702   | -0.24 |
| hsa-mir-210 | ABCB1    | -0.36 |
| hsa-mir-210 | ABCC3    | 0.43  |
| hsa-mir-210 | ABCG2    | -0.44 |
| hsa-mir-210 | ABHD14A  | -0.45 |
| hsa-mir-210 | ACTG2    | 0.39  |
| hsa-mir-210 | ADAM8    | 0.6   |
| hsa-mir-210 | ADFP     | 0.49  |
| hsa-mir-210 | ADM      | 0.67  |
| hsa-mir-210 | ADSSL1   | 0.4   |
| hsa-mir-210 | AIFM3    | -0.4  |
| hsa-mir-210 | AKAP12   | 0.41  |
| hsa-mir-210 | ANGPTL4  | 0.56  |
| hsa-mir-210 | ANKRD37  | 0.38  |
| hsa-mir-210 | ANXA2    | 0.52  |
| hsa-mir-210 | ARMET    | 0.43  |
| hsa-mir-210 | ARPP-21  | -0.42 |
| hsa-mir-210 | ARRDC3   | 0.51  |
| hsa-mir-210 | ATF5     | 0.4   |
| hsa-mir-210 | ATP6V0D2 | 0.56  |
| hsa-mir-210 | BNIP3    | 0.37  |
| hsa-mir-210 | BSN      | -0.45 |
| hsa-mir-210 | C15orf48 | 0.48  |
| hsa-mir-210 | C1orf113 | 0.58  |
| hsa-mir-210 | C1orf64  | -0.38 |
| hsa-mir-210 | C3orf28  | 0.47  |
| hsa-mir-210 | C4orf6   | 0.49  |
| hsa-mir-210 | CA12     | 0.59  |
| hsa-mir-210 | CA9      | 0.7   |
| hsa-mir-210 | CAMP     | 0.25  |
| hsa-mir-210 | CAV1     | 0.48  |
| hsa-mir-210 | CCK      | -0.42 |
| hsa-mir-210 | CCL7     | 0.47  |
| hsa-mir-210 | CD44     | 0.55  |
| hsa-mir-210 | CEACAM20 | 0.43  |
| hsa-mir-210 | CG018    | -0.31 |
| hsa-mir-210 | CHRD2    | 0.54  |
| hsa-mir-210 | CHRDL2   | 0.54  |
| hsa-mir-210 | CHRNA9   | 0.39  |
| hsa-mir-210 | CKMT1A   | -0.44 |
| hsa-mir-210 | CLEC5A   | 0.5   |
| hsa-mir-210 | COL1A1   | 0.42  |
| hsa-mir-210 | COL3A1   | 0.4   |
| hsa-mir-210 | COL4A1   | 0.4   |
| hsa-mir-210 | COL4A2   | 0.36  |
| hsa-mir-210 | CP       | 0.41  |
| hsa-mir-210 | CRYM     | -0.42 |
| hsa-mir-210 | CT45-6   | -0.5  |
| hsa-mir-210 | DCBLD2   | 0.48  |

|             |          |       |
|-------------|----------|-------|
| hsa-mir-210 | DDX25    | -0.39 |
| hsa-mir-210 | DGKB     | -0.37 |
| hsa-mir-210 | DHRS9    | -0.43 |
| hsa-mir-210 | DOCK9    | -0.32 |
| hsa-mir-210 | DOK6     | -0.47 |
| hsa-mir-210 | DPP10    | -0.48 |
| hsa-mir-210 | DYRK3    | 0.49  |
| hsa-mir-210 | EDN3     | -0.45 |
| hsa-mir-210 | EEA1     | 0.43  |
| hsa-mir-210 | EFCAB3   | 0.48  |
| hsa-mir-210 | EFHA2    | -0.46 |
| hsa-mir-210 | EGLN3    | 0.31  |
| hsa-mir-210 | ENO1     | 0.33  |
| hsa-mir-210 | ENTHD1   | 0.44  |
| hsa-mir-210 | ERO1L    | 0.63  |
| hsa-mir-210 | ESM1     | 0.33  |
| hsa-mir-210 | FAM114A1 | 0.55  |
| hsa-mir-210 | FAM139A  | 0.49  |
| hsa-mir-210 | FCGR2B   | 0.48  |
| hsa-mir-210 | FEM1C    | 0.39  |
| hsa-mir-210 | FKBP1B   | -0.21 |
| hsa-mir-210 | FKBP9    | 0.5   |
| hsa-mir-210 | FLJ22655 | -0.41 |
| hsa-mir-210 | FLNA     | 0.47  |
| hsa-mir-210 | FN1      | 0.46  |
| hsa-mir-210 | FNDC3B   | 0.51  |
| hsa-mir-210 | FRY      | -0.44 |
| hsa-mir-210 | FSTL1    | 0.41  |
| hsa-mir-210 | FSTL3    | 0.29  |
| hsa-mir-210 | GABRA5   | -0.42 |
| hsa-mir-210 | GABRG2   | -0.44 |
| hsa-mir-210 | GAPDH    | 0.41  |
| hsa-mir-210 | GBE1     | 0.67  |
| hsa-mir-210 | GLUD1    | -0.44 |
| hsa-mir-210 | GRASP    | -0.35 |
| hsa-mir-210 | GYS1     | 0.43  |
| hsa-mir-210 | HCN1     | -0.45 |
| hsa-mir-210 | HIG2     | 0.54  |
| hsa-mir-210 | HMOX1    | 0.43  |
| hsa-mir-210 | HPRT1    | -0.09 |
| hsa-mir-210 | HSPA5    | 0.45  |
| hsa-mir-210 | HSPA6    | 0.48  |
| hsa-mir-210 | IGFBP5   | 0.48  |
| hsa-mir-210 | IL8      | 0.43  |
| hsa-mir-210 | INSIG2   | 0.53  |
| hsa-mir-210 | ITGA1    | 0.31  |
| hsa-mir-210 | ITM2A    | -0.46 |
| hsa-mir-210 | KHDRBS2  | -0.48 |
| hsa-mir-210 | KIT      | -0.39 |
| hsa-mir-210 | KRT222P  | -0.47 |
| hsa-mir-210 | LAMB1    | 0.4   |
| hsa-mir-210 | LDHA     | 0.63  |
| hsa-mir-210 | LIN7B    | -0.37 |

|             |           |       |
|-------------|-----------|-------|
| hsa-mir-210 | LMAN1     | 0.52  |
| hsa-mir-210 | LOC441054 | 0.53  |
| hsa-mir-210 | LOC493869 | 0.47  |
| hsa-mir-210 | LOX       | 0.66  |
| hsa-mir-210 | LOXL2     | 0.49  |
| hsa-mir-210 | MAFF      | 0.44  |
| hsa-mir-210 | MC1R      | 0.38  |
| hsa-mir-210 | MMP7      | 0.42  |
| hsa-mir-210 | MMP9      | 0.3   |
| hsa-mir-210 | NDRG1     | 0.5   |
| hsa-mir-210 | NEFL      | -0.33 |
| hsa-mir-210 | NET1      | -0.48 |
| hsa-mir-210 | NOL3      | 0.41  |
| hsa-mir-210 | NOX4      | 0.39  |
| hsa-mir-210 | NRP1      | 0.51  |
| hsa-mir-210 | OSMR      | 0.46  |
| hsa-mir-210 | P4HA1     | 0.59  |
| hsa-mir-210 | P4HA2     | 0.47  |
| hsa-mir-210 | PANX1     | 0.48  |
| hsa-mir-210 | PCOLCE2   | 0.32  |
| hsa-mir-210 | PDIA4     | 0.47  |
| hsa-mir-210 | PDK1      | 0.54  |
| hsa-mir-210 | PDK3      | 0.43  |
| hsa-mir-210 | PFKFB4    | 0.51  |
| hsa-mir-210 | PGK1      | 0.51  |
| hsa-mir-210 | PLOD1     | 0.49  |
| hsa-mir-210 | PLOD2     | 0.66  |
| hsa-mir-210 | PLP2      | 0.5   |
| hsa-mir-210 | POLR2F    | -0.26 |
| hsa-mir-210 | PPP1R3B   | 0.56  |
| hsa-mir-210 | PPP3CB    | -0.44 |
| hsa-mir-210 | PRDX4     | 0.49  |
| hsa-mir-210 | PRELID2   | 0.38  |
| hsa-mir-210 | PTPN12    | 0.46  |
| hsa-mir-210 | PTX3      | 0.5   |
| hsa-mir-210 | RAB42     | 0.41  |
| hsa-mir-210 | RCAN1     | 0.34  |
| hsa-mir-210 | RNASE4    | 0.51  |
| hsa-mir-210 | RUNDC3B   | -0.47 |
| hsa-mir-210 | SAA1      | 0.4   |
| hsa-mir-210 | SEC61G    | 0.08  |
| hsa-mir-210 | SERPINE1  | 0.5   |
| hsa-mir-210 | SLC16A10  | 0.44  |
| hsa-mir-210 | SLC16A3   | 0.58  |
| hsa-mir-210 | SLC2A1    | 0.49  |
| hsa-mir-210 | SLC39A14  | 0.47  |
| hsa-mir-210 | SLCO1A2   | -0.49 |
| hsa-mir-210 | SLITRK4   | -0.44 |
| hsa-mir-210 | SOD2      | 0.44  |
| hsa-mir-210 | SPAG4     | 0.54  |
| hsa-mir-210 | SPINK1    | 0.54  |
| hsa-mir-210 | SPOCD1    | 0.43  |
| hsa-mir-210 | SPSB1     | 0.41  |

|             |            |       |
|-------------|------------|-------|
| hsa-mir-210 | SRPX       | 0.38  |
| hsa-mir-210 | SRPX2      | 0.45  |
| hsa-mir-210 | SSTR1      | -0.49 |
| hsa-mir-210 | ST6GALNAC1 | -0.49 |
| hsa-mir-210 | STBD1      | 0.42  |
| hsa-mir-210 | STC2       | 0.5   |
| hsa-mir-210 | TAGLN      | 0.35  |
| hsa-mir-210 | TAL1       | -0.4  |
| hsa-mir-210 | TGFBI      | 0.54  |
| hsa-mir-210 | TIMP1      | 0.46  |
| hsa-mir-210 | TMEM157    | 0.1   |
| hsa-mir-210 | TMEM45A    | 0.6   |
| hsa-mir-210 | TMEM59L    | -0.38 |
| hsa-mir-210 | TPM2       | 0.33  |
| hsa-mir-210 | TPM4       | 0.48  |
| hsa-mir-210 | TREM1      | 0.56  |
| hsa-mir-210 | TSC22D1    | -0.42 |
| hsa-mir-210 | UPP1       | 0.43  |
| hsa-mir-210 | VEGFA      | 0.64  |
| hsa-mir-210 | VIP        | -0.42 |
| hsa-mir-210 | ZAK        | 0.48  |
| hsa-mir-210 | ZCCHC6     | 0.49  |
| hsa-mir-210 | ZNF395     | 0.55  |
| hsa-mir-212 | C2orf15    | 0.16  |
| hsa-mir-212 | C5orf32    | 0.31  |
| hsa-mir-212 | CXorf57    | 0.04  |
| hsa-mir-212 | DKK1       | 0.25  |
| hsa-mir-212 | EFS        | -0.15 |
| hsa-mir-212 | FAM137A    | 0.12  |
| hsa-mir-212 | HPD        | 0.25  |
| hsa-mir-212 | NPAT       | -0.29 |
| hsa-mir-212 | PHIP       | -0.24 |
| hsa-mir-212 | RPESP      | 0.14  |
| hsa-mir-212 | SLC10A4    | 0.06  |
| hsa-mir-212 | SSBP2      | 0.03  |
| hsa-mir-212 | TMEM125    | 0.09  |
| hsa-mir-214 | ABAT       | -0.47 |
| hsa-mir-214 | ABCA3      | -0.36 |
| hsa-mir-214 | ACP5       | 0.44  |
| hsa-mir-214 | ACTA2      | 0.35  |
| hsa-mir-214 | ADAMTS1    | 0.38  |
| hsa-mir-214 | ALPK2      | 0.4   |
| hsa-mir-214 | ANTXR2     | 0.48  |
| hsa-mir-214 | AREG       | 0.33  |
| hsa-mir-214 | ASAM       | 0.49  |
| hsa-mir-214 | ASPN       | 0.46  |
| hsa-mir-214 | C10orf30   | -0.36 |
| hsa-mir-214 | C1orf101   | -0.08 |
| hsa-mir-214 | C1orf61    | -0.4  |
| hsa-mir-214 | C1QTNF6    | 0.41  |
| hsa-mir-214 | C4orf19    | -0.22 |
| hsa-mir-214 | C4orf32    | 0.41  |
| hsa-mir-214 | CCL26      | 0.4   |

|             |          |       |
|-------------|----------|-------|
| hsa-mir-214 | CD248    | 0.51  |
| hsa-mir-214 | CD28     | 0.38  |
| hsa-mir-214 | CD36     | 0.31  |
| hsa-mir-214 | CD70     | 0.35  |
| hsa-mir-214 | CFHR3    | 0.39  |
| hsa-mir-214 | CKAP4    | 0.5   |
| hsa-mir-214 | CLEC2B   | 0.4   |
| hsa-mir-214 | CNN2     | 0.56  |
| hsa-mir-214 | COL10A1  | 0.53  |
| hsa-mir-214 | COL12A1  | 0.65  |
| hsa-mir-214 | COL14A1  | 0.45  |
| hsa-mir-214 | COL15A1  | 0.55  |
| hsa-mir-214 | COL1A1   | 0.65  |
| hsa-mir-214 | COL1A2   | 0.7   |
| hsa-mir-214 | COL24A1  | 0.41  |
| hsa-mir-214 | COL3A1   | 0.62  |
| hsa-mir-214 | COL5A1   | 0.61  |
| hsa-mir-214 | COL5A2   | 0.57  |
| hsa-mir-214 | COL6A1   | 0.53  |
| hsa-mir-214 | COL6A2   | 0.6   |
| hsa-mir-214 | COL6A3   | 0.74  |
| hsa-mir-214 | CRABP2   | 0.59  |
| hsa-mir-214 | CRB1     | -0.38 |
| hsa-mir-214 | CRIP1    | 0.37  |
| hsa-mir-214 | CTHRC1   | 0.48  |
| hsa-mir-214 | CTNND2   | -0.45 |
| hsa-mir-214 | CTSK     | 0.47  |
| hsa-mir-214 | CXCL13   | 0.44  |
| hsa-mir-214 | DC2      | 0.42  |
| hsa-mir-214 | DCN      | 0.61  |
| hsa-mir-214 | DGKG     | -0.24 |
| hsa-mir-214 | DPT      | 0.6   |
| hsa-mir-214 | EBF1     | 0.47  |
| hsa-mir-214 | EPN2     | -0.32 |
| hsa-mir-214 | EPYC     | 0.47  |
| hsa-mir-214 | FAM20A   | 0.49  |
| hsa-mir-214 | FAM26E   | 0.49  |
| hsa-mir-214 | FAM5C    | -0.39 |
| hsa-mir-214 | FAP      | 0.6   |
| hsa-mir-214 | FBLN1    | 0.56  |
| hsa-mir-214 | FGFBP3   | -0.31 |
| hsa-mir-214 | FKBP11   | 0.51  |
| hsa-mir-214 | FKBP7    | 0.54  |
| hsa-mir-214 | FLJ10324 | -0.24 |
| hsa-mir-214 | FLJ22662 | 0.45  |
| hsa-mir-214 | FMO1     | 0.54  |
| hsa-mir-214 | FNDC1    | 0.42  |
| hsa-mir-214 | GALNT5   | 0.38  |
| hsa-mir-214 | GATA6    | 0.41  |
| hsa-mir-214 | GFAP     | -0.14 |
| hsa-mir-214 | GLDC     | -0.31 |
| hsa-mir-214 | GLT8D2   | 0.54  |
| hsa-mir-214 | GLT8D4   | 0.45  |

|             |           |       |
|-------------|-----------|-------|
| hsa-mir-214 | GPLD1     | -0.27 |
| hsa-mir-214 | GPM6B     | -0.45 |
| hsa-mir-214 | GPR124    | 0.57  |
| hsa-mir-214 | HES5      | -0.34 |
| hsa-mir-214 | HMCN1     | 0.49  |
| hsa-mir-214 | HTRA3     | 0.5   |
| hsa-mir-214 | ICAM3     | 0.31  |
| hsa-mir-214 | IGFBP4    | 0.45  |
| hsa-mir-214 | IL1R1     | 0.48  |
| hsa-mir-214 | IL7R      | 0.4   |
| hsa-mir-214 | INDO      | 0.34  |
| hsa-mir-214 | INHBA     | 0.49  |
| hsa-mir-214 | ISLR      | 0.46  |
| hsa-mir-214 | ITGA11    | 0.54  |
| hsa-mir-214 | ITGBL1    | 0.49  |
| hsa-mir-214 | KDEL3     | 0.57  |
| hsa-mir-214 | LAMB1     | 0.54  |
| hsa-mir-214 | LEPRE1    | 0.61  |
| hsa-mir-214 | LEPREL2   | 0.53  |
| hsa-mir-214 | LOC202459 | 0.4   |
| hsa-mir-214 | LOC285382 | -0.3  |
| hsa-mir-214 | LOC493869 | 0.47  |
| hsa-mir-214 | LOC541471 | 0.34  |
| hsa-mir-214 | LOXL2     | 0.53  |
| hsa-mir-214 | LRRC15    | 0.49  |
| hsa-mir-214 | LUM       | 0.71  |
| hsa-mir-214 | LY96      | 0.27  |
| hsa-mir-214 | MANEAL    | -0.37 |
| hsa-mir-214 | MDFIC     | 0.46  |
| hsa-mir-214 | MFAP2     | 0.62  |
| hsa-mir-214 | MFAP4     | 0.39  |
| hsa-mir-214 | MFAP5     | 0.41  |
| hsa-mir-214 | MGC24103  | 0.44  |
| hsa-mir-214 | MME       | 0.53  |
| hsa-mir-214 | MMP1      | 0.44  |
| hsa-mir-214 | MMP11     | 0.67  |
| hsa-mir-214 | MMP13     | 0.55  |
| hsa-mir-214 | MOSC1     | -0.4  |
| hsa-mir-214 | MXRA5     | 0.51  |
| hsa-mir-214 | MXRA8     | 0.47  |
| hsa-mir-214 | MYL9      | 0.46  |
| hsa-mir-214 | MYO1B     | 0.42  |
| hsa-mir-214 | NID2      | 0.46  |
| hsa-mir-214 | NLGN1     | -0.44 |
| hsa-mir-214 | OAF       | 0.45  |
| hsa-mir-214 | OGN       | 0.38  |
| hsa-mir-214 | OLFML2B   | 0.49  |
| hsa-mir-214 | OLFML3    | 0.41  |
| hsa-mir-214 | OLIG1     | -0.43 |
| hsa-mir-214 | OMD       | 0.37  |
| hsa-mir-214 | P4HA2     | 0.5   |
| hsa-mir-214 | P4HA3     | 0.51  |
| hsa-mir-214 | PAPSS2    | 0.41  |

|             |           |       |
|-------------|-----------|-------|
| hsa-mir-214 | PCDH9     | -0.29 |
| hsa-mir-214 | PCOLCE    | 0.71  |
| hsa-mir-214 | PDGFRB    | 0.53  |
| hsa-mir-214 | PDGFRL    | 0.4   |
| hsa-mir-214 | PHLDB2    | 0.48  |
| hsa-mir-214 | PHLPP     | -0.39 |
| hsa-mir-214 | PMAIP1    | 0.35  |
| hsa-mir-214 | POSTN     | 0.41  |
| hsa-mir-214 | PPARG     | 0.34  |
| hsa-mir-214 | PRKCDBP   | 0.32  |
| hsa-mir-214 | PRR16     | 0.39  |
| hsa-mir-214 | PTGER2    | 0.49  |
| hsa-mir-214 | PTGER4    | 0.42  |
| hsa-mir-214 | PTGIS     | 0.45  |
| hsa-mir-214 | PTPRZ1    | -0.36 |
| hsa-mir-214 | RAB11FIP1 | 0.35  |
| hsa-mir-214 | RCN3      | 0.63  |
| hsa-mir-214 | RHOH      | 0.29  |
| hsa-mir-214 | SALL2     | -0.43 |
| hsa-mir-214 | SCD5      | -0.38 |
| hsa-mir-214 | SCG3      | -0.45 |
| hsa-mir-214 | SEC24D    | 0.5   |
| hsa-mir-214 | SEMA3C    | 0.36  |
| hsa-mir-214 | SERPINF1  | 0.38  |
| hsa-mir-214 | SERPINH1  | 0.54  |
| hsa-mir-214 | SFRP2     | 0.42  |
| hsa-mir-214 | SLC35F1   | -0.28 |
| hsa-mir-214 | SLIT2     | 0.3   |
| hsa-mir-214 | SNAI2     | 0.59  |
| hsa-mir-214 | SPHK1     | 0.39  |
| hsa-mir-214 | SPON2     | 0.51  |
| hsa-mir-214 | STRA6     | 0.45  |
| hsa-mir-214 | SVIL      | 0.45  |
| hsa-mir-214 | TBC1D8B   | 0.42  |
| hsa-mir-214 | TES       | 0.51  |
| hsa-mir-214 | TGFBI     | 0.49  |
| hsa-mir-214 | THBS1     | 0.52  |
| hsa-mir-214 | TMEM16H   | -0.28 |
| hsa-mir-214 | TMEM2     | 0.43  |
| hsa-mir-214 | TPBG      | 0.43  |
| hsa-mir-214 | TPM1      | 0.43  |
| hsa-mir-214 | TPM2      | 0.48  |
| hsa-mir-214 | TPM4      | 0.48  |
| hsa-mir-214 | TPSAB1    | 0.35  |
| hsa-mir-214 | TWIST1    | 0.49  |
| hsa-mir-214 | VDR       | 0.46  |
| hsa-mir-214 | VEGFC     | 0.44  |
| hsa-mir-214 | WISP1     | 0.43  |
| hsa-mir-214 | ZFHX2     | -0.28 |
| hsa-mir-214 | ZNF177    | -0.34 |
| hsa-mir-216 | AADAC     | -0.56 |
| hsa-mir-216 | ABCC2     | -0.62 |
| hsa-mir-216 | ABCG5     | -0.64 |

|             |           |       |
|-------------|-----------|-------|
| hsa-mir-216 | ACF       | -0.64 |
| hsa-mir-216 | ACSM1     | -0.54 |
| hsa-mir-216 | ACSM2B    | -0.68 |
| hsa-mir-216 | ACSM3     | -0.62 |
| hsa-mir-216 | ACTBL1    | -0.65 |
| hsa-mir-216 | ACTL8     | -0.67 |
| hsa-mir-216 | ADCY4     | 0.52  |
| hsa-mir-216 | ADH4      | -0.58 |
| hsa-mir-216 | ADH6      | -0.48 |
| hsa-mir-216 | AFP       | -0.58 |
| hsa-mir-216 | AGR2      | -0.58 |
| hsa-mir-216 | AKR1CL2   | -0.63 |
| hsa-mir-216 | ALB       | -0.66 |
| hsa-mir-216 | ALS2CR11  | -0.31 |
| hsa-mir-216 | ALX1      | -0.47 |
| hsa-mir-216 | AMHR2     | -0.72 |
| hsa-mir-216 | AMPD1     | -0.46 |
| hsa-mir-216 | AMTN      | -0.61 |
| hsa-mir-216 | ANKRD21   | -0.58 |
| hsa-mir-216 | ANXA10    | -0.3  |
| hsa-mir-216 | ANXA9     | -0.5  |
| hsa-mir-216 | APOA2     | -0.59 |
| hsa-mir-216 | APOA5     | -0.68 |
| hsa-mir-216 | APOB      | -0.46 |
| hsa-mir-216 | APOC3     | -0.55 |
| hsa-mir-216 | APOF      | -0.52 |
| hsa-mir-216 | APOH      | -0.61 |
| hsa-mir-216 | AQP3      | -0.57 |
| hsa-mir-216 | AQP4      | 0.38  |
| hsa-mir-216 | ARHGEF6   | 0.45  |
| hsa-mir-216 | ARL14     | -0.51 |
| hsa-mir-216 | ART4      | -0.73 |
| hsa-mir-216 | ASGR2     | -0.49 |
| hsa-mir-216 | ATAD4     | -0.66 |
| hsa-mir-216 | ATP6V0A4  | -0.23 |
| hsa-mir-216 | AURKC     | -0.45 |
| hsa-mir-216 | BAAT      | -0.63 |
| hsa-mir-216 | BAIAP2L1  | -0.67 |
| hsa-mir-216 | BDKRB1    | -0.52 |
| hsa-mir-216 | BLK       | -0.29 |
| hsa-mir-216 | BMP5      | -0.34 |
| hsa-mir-216 | BSND      | -0.56 |
| hsa-mir-216 | C10orf122 | -0.69 |
| hsa-mir-216 | C10orf63  | 0.44  |
| hsa-mir-216 | C10orf82  | -0.57 |
| hsa-mir-216 | C12orf56  | -0.48 |
| hsa-mir-216 | C14orf115 | -0.66 |
| hsa-mir-216 | C14orf152 | 0.39  |
| hsa-mir-216 | C14orf73  | -0.67 |
| hsa-mir-216 | C16orf73  | -0.63 |
| hsa-mir-216 | C18orf2   | -0.72 |
| hsa-mir-216 | C18orf34  | 0.54  |
| hsa-mir-216 | C19orf21  | -0.62 |



|             |           |       |
|-------------|-----------|-------|
| hsa-mir-216 | C19orf46  | -0.47 |
| hsa-mir-216 | C1orf172  | -0.53 |
| hsa-mir-216 | C20orf26  | 0.56  |
| hsa-mir-216 | C21orf125 | -0.69 |
| hsa-mir-216 | C21orf62  | 0.43  |
| hsa-mir-216 | C21orf90  | -0.55 |
| hsa-mir-216 | C2orf48   | -0.5  |
| hsa-mir-216 | C3orf32   | -0.41 |
| hsa-mir-216 | C4BPA     | -0.39 |
| hsa-mir-216 | C4BPB     | -0.62 |
| hsa-mir-216 | C4orf7    | -0.31 |
| hsa-mir-216 | C5orf38   | -0.34 |
| hsa-mir-216 | C6orf156  | -0.41 |
| hsa-mir-216 | C8A       | -0.71 |
| hsa-mir-216 | C8B       | -0.63 |
| hsa-mir-216 | C9orf69   | -0.4  |
| hsa-mir-216 | CALML3    | -0.5  |
| hsa-mir-216 | CALML5    | -0.67 |
| hsa-mir-216 | CAPN6     | -0.5  |
| hsa-mir-216 | CARD11    | -0.62 |
| hsa-mir-216 | CD163     | 0.32  |
| hsa-mir-216 | CD1E      | -0.56 |
| hsa-mir-216 | CD34      | 0.54  |
| hsa-mir-216 | CD8B      | -0.58 |
| hsa-mir-216 | CDH16     | -0.68 |
| hsa-mir-216 | CDH9      | -0.43 |
| hsa-mir-216 | CEACAM1   | -0.62 |
| hsa-mir-216 | CEACAM5   | -0.68 |
| hsa-mir-216 | CEACAM6   | -0.61 |
| hsa-mir-216 | CES1      | -0.46 |
| hsa-mir-216 | CGA       | -0.6  |
| hsa-mir-216 | CLCA2     | -0.65 |
| hsa-mir-216 | CLDN6     | -0.65 |
| hsa-mir-216 | CLSTN3    | -0.57 |
| hsa-mir-216 | COL2A1    | -0.56 |
| hsa-mir-216 | CPB2      | -0.63 |
| hsa-mir-216 | CPN1      | -0.68 |
| hsa-mir-216 | CR1L      | -0.5  |
| hsa-mir-216 | CREB3L3   | -0.67 |
| hsa-mir-216 | CRYBA1    | -0.19 |
| hsa-mir-216 | CTCFL     | -0.66 |
| hsa-mir-216 | CXorf36   | 0.57  |
| hsa-mir-216 | CYP1A1    | -0.69 |
| hsa-mir-216 | CYP24A1   | -0.56 |
| hsa-mir-216 | CYP2F1    | -0.73 |
| hsa-mir-216 | DAZL      | -0.18 |
| hsa-mir-216 | DERL3     | -0.65 |
| hsa-mir-216 | DGAT2     | -0.44 |
| hsa-mir-216 | DIO1      | -0.56 |
| hsa-mir-216 | DLK1      | -0.31 |
| hsa-mir-216 | DMBX1     | -0.44 |
| hsa-mir-216 | DNAH7     | 0.48  |
| hsa-mir-216 | DNAH8     | -0.58 |

|             |          |       |
|-------------|----------|-------|
| hsa-mir-216 | DNMT3L   | -0.65 |
| hsa-mir-216 | DOHH     | -0.57 |
| hsa-mir-216 | DPPA2    | -0.45 |
| hsa-mir-216 | DPYSL5   | 0.64  |
| hsa-mir-216 | DQX1     | -0.55 |
| hsa-mir-216 | DRD5     | -0.29 |
| hsa-mir-216 | DSCR6    | -0.34 |
| hsa-mir-216 | DSCR8    | -0.67 |
| hsa-mir-216 | DSG2     | -0.53 |
| hsa-mir-216 | DUSP13   | -0.41 |
| hsa-mir-216 | ECEL1    | -0.19 |
| hsa-mir-216 | ELA2A    | -0.37 |
| hsa-mir-216 | ELA3A    | -0.59 |
| hsa-mir-216 | ELTD1    | 0.54  |
| hsa-mir-216 | EMCN     | 0.46  |
| hsa-mir-216 | ENPP3    | -0.52 |
| hsa-mir-216 | EPGN     | -0.69 |
| hsa-mir-216 | EPS8L1   | -0.46 |
| hsa-mir-216 | ESX1     | -0.65 |
| hsa-mir-216 | F10      | -0.5  |
| hsa-mir-216 | F2       | -0.6  |
| hsa-mir-216 | F3       | 0.42  |
| hsa-mir-216 | FAIM3    | -0.48 |
| hsa-mir-216 | FAM112B  | -0.48 |
| hsa-mir-216 | FAM130A2 | 0.46  |
| hsa-mir-216 | FAM83A   | -0.75 |
| hsa-mir-216 | FAM83B   | -0.68 |
| hsa-mir-216 | FAM9B    | -0.71 |
| hsa-mir-216 | FBXL21   | -0.72 |
| hsa-mir-216 | FGA      | -0.65 |
| hsa-mir-216 | FGB      | -0.64 |
| hsa-mir-216 | FGF19    | -0.56 |
| hsa-mir-216 | FGF23    | -0.49 |
| hsa-mir-216 | FGG      | -0.61 |
| hsa-mir-216 | FGL2     | 0.47  |
| hsa-mir-216 | FHL5     | 0.55  |
| hsa-mir-216 | FLJ21075 | -0.69 |
| hsa-mir-216 | FLJ32658 | -0.57 |
| hsa-mir-216 | FLJ34047 | -0.53 |
| hsa-mir-216 | FLJ35880 | -0.6  |
| hsa-mir-216 | FLJ36208 | -0.58 |
| hsa-mir-216 | FLJ46111 | -0.6  |
| hsa-mir-216 | FOXA1    | -0.44 |
| hsa-mir-216 | FOXA2    | -0.56 |
| hsa-mir-216 | FOXA3    | -0.49 |
| hsa-mir-216 | FTCD     | -0.68 |
| hsa-mir-216 | G6PC     | -0.63 |
| hsa-mir-216 | GABRE    | -0.33 |
| hsa-mir-216 | GABRG3   | -0.43 |
| hsa-mir-216 | GAGE1    | -0.65 |
| hsa-mir-216 | GATA2    | -0.63 |
| hsa-mir-216 | GCNT3    | -0.65 |
| hsa-mir-216 | GDF3     | -0.47 |

|             |          |       |
|-------------|----------|-------|
| hsa-mir-216 | GDF6     | -0.48 |
| hsa-mir-216 | GFI1     | -0.49 |
| hsa-mir-216 | GFI1B    | -0.7  |
| hsa-mir-216 | GJA4     | 0.52  |
| hsa-mir-216 | GJB7     | -0.66 |
| hsa-mir-216 | GLRA3    | -0.38 |
| hsa-mir-216 | GLULD1   | -0.22 |
| hsa-mir-216 | GNA13    | 0.54  |
| hsa-mir-216 | GPR157   | -0.53 |
| hsa-mir-216 | GPR174   | -0.5  |
| hsa-mir-216 | GPR34    | 0.45  |
| hsa-mir-216 | GPR4     | 0.49  |
| hsa-mir-216 | GPR75    | 0.61  |
| hsa-mir-216 | GPX2     | -0.64 |
| hsa-mir-216 | GRAP2    | -0.51 |
| hsa-mir-216 | GSTA2    | -0.37 |
| hsa-mir-216 | GSTA3    | -0.59 |
| hsa-mir-216 | GSTA5    | -0.52 |
| hsa-mir-216 | GYPB     | -0.77 |
| hsa-mir-216 | GYPE     | -0.56 |
| hsa-mir-216 | GYPE     | -0.71 |
| hsa-mir-216 | HAL      | -0.25 |
| hsa-mir-216 | HAND1    | -0.7  |
| hsa-mir-216 | HBE1     | -0.5  |
| hsa-mir-216 | HBG2     | -0.6  |
| hsa-mir-216 | HEMGN    | -0.5  |
| hsa-mir-216 | HFE2     | -0.6  |
| hsa-mir-216 | HOOK1    | -0.46 |
| hsa-mir-216 | HORMAD1  | -0.5  |
| hsa-mir-216 | HORMAD2  | 0.56  |
| hsa-mir-216 | HOXB9    | -0.53 |
| hsa-mir-216 | HOXC12   | -0.45 |
| hsa-mir-216 | HPDL     | -0.51 |
| hsa-mir-216 | HPN      | -0.57 |
| hsa-mir-216 | HSD17B2  | -0.43 |
| hsa-mir-216 | HSH2D    | -0.61 |
| hsa-mir-216 | HSPC105  | -0.24 |
| hsa-mir-216 | HTR1E    | -0.4  |
| hsa-mir-216 | ICAM4    | -0.67 |
| hsa-mir-216 | ICEBERG  | -0.41 |
| hsa-mir-216 | IGF2     | -0.29 |
| hsa-mir-216 | IGF2BP1  | -0.62 |
| hsa-mir-216 | IGFBPL1  | -0.22 |
| hsa-mir-216 | IGLV2-14 | -0.73 |
| hsa-mir-216 | IGSF6    | 0.45  |
| hsa-mir-216 | IL11     | -0.45 |
| hsa-mir-216 | IL22RA1  | -0.57 |
| hsa-mir-216 | IL23R    | -0.71 |
| hsa-mir-216 | INSL4    | -0.56 |
| hsa-mir-216 | INSL5    | 0.65  |
| hsa-mir-216 | IRX1     | -0.01 |
| hsa-mir-216 | ISL1     | -0.37 |
| hsa-mir-216 | ISOC2    | -0.4  |

|             |             |       |
|-------------|-------------|-------|
| hsa-mir-216 | ISX         | -0.6  |
| hsa-mir-216 | ITIH3       | -0.6  |
| hsa-mir-216 | JARID1D     | -0.16 |
| hsa-mir-216 | KCNG3       | -0.65 |
| hsa-mir-216 | KCNK13      | 0.56  |
| hsa-mir-216 | KCNK5       | -0.47 |
| hsa-mir-216 | KDR         | 0.56  |
| hsa-mir-216 | KIAA0825    | -0.58 |
| hsa-mir-216 | KIAA1086    | -0.37 |
| hsa-mir-216 | KIAA1383    | 0.47  |
| hsa-mir-216 | KIAA1822L   | -0.34 |
| hsa-mir-216 | KIFC3       | -0.58 |
| hsa-mir-216 | KLF1        | -0.7  |
| hsa-mir-216 | KLF7        | 0.51  |
| hsa-mir-216 | KLK1        | -0.62 |
| hsa-mir-216 | KLK10       | -0.57 |
| hsa-mir-216 | KLK11       | -0.61 |
| hsa-mir-216 | KLK12       | -0.44 |
| hsa-mir-216 | KLK8        | -0.61 |
| hsa-mir-216 | KNG1        | -0.45 |
| hsa-mir-216 | KRT12       | -0.53 |
| hsa-mir-216 | KRT13       | -0.62 |
| hsa-mir-216 | KRT15       | -0.36 |
| hsa-mir-216 | KRT16       | -0.64 |
| hsa-mir-216 | KRT23       | -0.46 |
| hsa-mir-216 | KRT33A      | -0.68 |
| hsa-mir-216 | KRT34       | -0.56 |
| hsa-mir-216 | KRT37       | -0.68 |
| hsa-mir-216 | KRT6A       | -0.65 |
| hsa-mir-216 | KRT6B       | -0.5  |
| hsa-mir-216 | KRT6C       | -0.72 |
| hsa-mir-216 | KRT75       | -0.09 |
| hsa-mir-216 | KRT80       | -0.46 |
| hsa-mir-216 | KRT86       | -0.71 |
| hsa-mir-216 | KRTAP1-5    | -0.64 |
| hsa-mir-216 | KRTAP3-1    | -0.66 |
| hsa-mir-216 | KRTDAP      | -0.68 |
| hsa-mir-216 | L1TD1       | -0.54 |
| hsa-mir-216 | LCT         | -0.66 |
| hsa-mir-216 | LDHC        | -0.37 |
| hsa-mir-216 | LDLRAD1     | -0.73 |
| hsa-mir-216 | LIN28       | -0.63 |
| hsa-mir-216 | LIN28B      | -0.52 |
| hsa-mir-216 | 22NC03-75B3 | -0.53 |
| hsa-mir-216 | LMOD1       | 0.5   |
| hsa-mir-216 | LOC129293   | -0.62 |
| hsa-mir-216 | LOC441601   | -0.75 |
| hsa-mir-216 | LOC91461    | -0.57 |
| hsa-mir-216 | LRRC4B      | 0.45  |
| hsa-mir-216 | LTB4R       | -0.7  |
| hsa-mir-216 | MAEL        | 0.49  |
| hsa-mir-216 | MAGEA1      | -0.46 |
| hsa-mir-216 | MAGEA10     | -0.6  |

|             |           |       |
|-------------|-----------|-------|
| hsa-mir-216 | MAGEA4    | -0.56 |
| hsa-mir-216 | MAGEA5    | -0.63 |
| hsa-mir-216 | MAGEA8    | -0.74 |
| hsa-mir-216 | MAGEA9    | -0.55 |
| hsa-mir-216 | MAGEB6    | -0.58 |
| hsa-mir-216 | MAGEC1    | -0.56 |
| hsa-mir-216 | MAGEC2    | -0.43 |
| hsa-mir-216 | MAGEE2    | 0.39  |
| hsa-mir-216 | MAP2      | 0.46  |
| hsa-mir-216 | MAP2K7    | 0.52  |
| hsa-mir-216 | MAPK12    | -0.55 |
| hsa-mir-216 | MAT1A     | -0.47 |
| hsa-mir-216 | MBL2      | -0.6  |
| hsa-mir-216 | MED18     | -0.21 |
| hsa-mir-216 | MFAP3L    | 0.4   |
| hsa-mir-216 | MGC102966 | -0.53 |
| hsa-mir-216 | MGC10981  | -0.63 |
| hsa-mir-216 | MGC45800  | -0.32 |
| hsa-mir-216 | MIA2      | -0.62 |
| hsa-mir-216 | MIPOL1    | -0.48 |
| hsa-mir-216 | MIRH1     | -0.53 |
| hsa-mir-216 | MLANA     | -0.57 |
| hsa-mir-216 | MMP12     | -0.1  |
| hsa-mir-216 | MMRN1     | 0.6   |
| hsa-mir-216 | MPZL3     | -0.57 |
| hsa-mir-216 | MRGPRX3   | -0.69 |
| hsa-mir-216 | MS4A1     | -0.64 |
| hsa-mir-216 | MS4A3     | -0.71 |
| hsa-mir-216 | MSLN      | -0.46 |
| hsa-mir-216 | MSMB      | -0.74 |
| hsa-mir-216 | MSX2      | -0.54 |
| hsa-mir-216 | MTMR8     | -0.71 |
| hsa-mir-216 | MUC15     | -0.4  |
| hsa-mir-216 | MUC16     | -0.66 |
| hsa-mir-216 | MYCT1     | 0.51  |
| hsa-mir-216 | MYEOV     | -0.64 |
| hsa-mir-216 | MYH2      | -0.62 |
| hsa-mir-216 | MYL1      | -0.54 |
| hsa-mir-216 | MYL7      | -0.76 |
| hsa-mir-216 | MYLC2PL   | -0.63 |
| hsa-mir-216 | MYO1A     | -0.57 |
| hsa-mir-216 | MYPN      | -0.52 |
| hsa-mir-216 | NANOGP1   | -0.59 |
| hsa-mir-216 | NAT8      | -0.68 |
| hsa-mir-216 | NDST4     | -0.51 |
| hsa-mir-216 | NLRP7     | -0.59 |
| hsa-mir-216 | NOTUM     | -0.53 |
| hsa-mir-216 | NOX5      | -0.67 |
| hsa-mir-216 | NPFFR2    | -0.58 |
| hsa-mir-216 | NPM3      | -0.5  |
| hsa-mir-216 | NR0B2     | -0.63 |
| hsa-mir-216 | NR1H4     | -0.47 |
| hsa-mir-216 | NRG4      | -0.78 |

|             |          |       |
|-------------|----------|-------|
| hsa-mir-216 | NS3BP    | -0.45 |
| hsa-mir-216 | NTF3     | -0.6  |
| hsa-mir-216 | NUP210L  | -0.59 |
| hsa-mir-216 | ODAM     | -0.62 |
| hsa-mir-216 | OR1D2    | -0.85 |
| hsa-mir-216 | OR2T2    | 0.67  |
| hsa-mir-216 | OR51B5   | -0.72 |
| hsa-mir-216 | OR51E1   | 0.6   |
| hsa-mir-216 | OR51I1   | -0.7  |
| hsa-mir-216 | OSTalpha | -0.55 |
| hsa-mir-216 | OTX2     | -0.72 |
| hsa-mir-216 | P2RY10   | -0.41 |
| hsa-mir-216 | PAEP     | -0.49 |
| hsa-mir-216 | PAGE1    | -0.65 |
| hsa-mir-216 | PAGE2    | -0.49 |
| hsa-mir-216 | PAPPA    | -0.52 |
| hsa-mir-216 | PAX9     | -0.59 |
| hsa-mir-216 | PCSK9    | -0.52 |
| hsa-mir-216 | PDILT    | -0.61 |
| hsa-mir-216 | PIAS4    | -0.59 |
| hsa-mir-216 | PITPNM1  | -0.53 |
| hsa-mir-216 | PIWIL2   | -0.67 |
| hsa-mir-216 | PKLR     | -0.63 |
| hsa-mir-216 | PKP2     | -0.49 |
| hsa-mir-216 | PLA1A    | -0.51 |
| hsa-mir-216 | PLA2G12B | -0.56 |
| hsa-mir-216 | PLA2G3   | -0.52 |
| hsa-mir-216 | PLAC1    | -0.43 |
| hsa-mir-216 | PLEKHN1  | -0.53 |
| hsa-mir-216 | PLXDC1   | 0.52  |
| hsa-mir-216 | PNLIPRP2 | -0.58 |
| hsa-mir-216 | POTE15   | -0.64 |
| hsa-mir-216 | POU5F1P3 | -0.59 |
| hsa-mir-216 | PRAMEF8  | -0.61 |
| hsa-mir-216 | PRAP1    | -0.71 |
| hsa-mir-216 | PRDM7    | -0.67 |
| hsa-mir-216 | PRDM9    | -0.71 |
| hsa-mir-216 | PROC     | -0.58 |
| hsa-mir-216 | PRODH2   | -0.66 |
| hsa-mir-216 | PRSS1    | -0.73 |
| hsa-mir-216 | PRSS2    | -0.68 |
| hsa-mir-216 | PRSS21   | -0.59 |
| hsa-mir-216 | PRSS3    | -0.56 |
| hsa-mir-216 | PRSS7    | -0.54 |
| hsa-mir-216 | PSG6     | -0.64 |
| hsa-mir-216 | PTGFR    | -0.59 |
| hsa-mir-216 | RAB25    | -0.57 |
| hsa-mir-216 | RAET1E   | -0.7  |
| hsa-mir-216 | RASGRP3  | 0.49  |
| hsa-mir-216 | RBM35B   | -0.53 |
| hsa-mir-216 | RFTN2    | 0.52  |
| hsa-mir-216 | RHAG     | -0.54 |
| hsa-mir-216 | RHD      | -0.56 |

|             |             |       |
|-------------|-------------|-------|
| hsa-mir-216 | RHEBL1      | -0.62 |
| hsa-mir-216 | RHOV        | -0.67 |
| hsa-mir-216 | RNF152      | 0.52  |
| hsa-mir-216 | RNF183      | -0.61 |
| hsa-mir-216 | RNF212      | -0.55 |
| hsa-mir-216 | ROS1        | -0.46 |
| hsa-mir-216 | RP13-36C9.6 | -0.51 |
| hsa-mir-216 | RPS6KA6     | -0.15 |
| hsa-mir-216 | RSBN1       | 0.45  |
| hsa-mir-216 | RTP3        | -0.37 |
| hsa-mir-216 | S100A14     | -0.57 |
| hsa-mir-216 | S100A2      | 0.61  |
| hsa-mir-216 | SAGE1       | -0.56 |
| hsa-mir-216 | SEC14L4     | -0.59 |
| hsa-mir-216 | SEMA3G      | -0.67 |
| hsa-mir-216 | SERPINA10   | -0.56 |
| hsa-mir-216 | SERPINA11   | -0.72 |
| hsa-mir-216 | SERPINA4    | -0.71 |
| hsa-mir-216 | SERPINA6    | -0.66 |
| hsa-mir-216 | SERPINA7    | -0.62 |
| hsa-mir-216 | SERPINB2    | -0.61 |
| hsa-mir-216 | SERPINB3    | -0.7  |
| hsa-mir-216 | SERPINB4    | -0.68 |
| hsa-mir-216 | SERPINB5    | -0.68 |
| hsa-mir-216 | SFTPA1      | -0.55 |
| hsa-mir-216 | SH2D3A      | -0.63 |
| hsa-mir-216 | SH3RF2      | -0.49 |
| hsa-mir-216 | SLAMF1      | 0.44  |
| hsa-mir-216 | SLC12A3     | -0.71 |
| hsa-mir-216 | SLC17A2     | -0.76 |
| hsa-mir-216 | SLC18A1     | -0.41 |
| hsa-mir-216 | SLC1A6      | -0.42 |
| hsa-mir-216 | SLC23A1     | -0.67 |
| hsa-mir-216 | SLC25A21    | -0.55 |
| hsa-mir-216 | SLC2A2      | -0.62 |
| hsa-mir-216 | SLC30A8     | -0.59 |
| hsa-mir-216 | SLC39A5     | -0.64 |
| hsa-mir-216 | SLC44A4     | -0.68 |
| hsa-mir-216 | SLC45A2     | -0.78 |
| hsa-mir-216 | SLC6A4      | -0.73 |
| hsa-mir-216 | SLCO1B1     | -0.45 |
| hsa-mir-216 | SLCO1B3     | -0.52 |
| hsa-mir-216 | SMC1B       | -0.21 |
| hsa-mir-216 | SMCR5       | -0.63 |
| hsa-mir-216 | SMPDL3B     | -0.64 |
| hsa-mir-216 | SNX16       | 0.48  |
| hsa-mir-216 | SOAT2       | -0.55 |
| hsa-mir-216 | SPANXC      | -0.55 |
| hsa-mir-216 | SPANXD      | -0.48 |
| hsa-mir-216 | SPINK4      | -0.63 |
| hsa-mir-216 | SPINK5      | -0.64 |
| hsa-mir-216 | SPINK5L3    | -0.4  |
| hsa-mir-216 | SPRR1B      | -0.82 |

|             |           |       |
|-------------|-----------|-------|
| hsa-mir-216 | SPRR2D    | -0.71 |
| hsa-mir-216 | SPRR3     | -0.61 |
| hsa-mir-216 | SSX1      | -0.7  |
| hsa-mir-216 | SSX7      | -0.61 |
| hsa-mir-216 | STGC3     | -0.6  |
| hsa-mir-216 | SUHW1     | -0.58 |
| hsa-mir-216 | SULT1C4   | 0.74  |
| hsa-mir-216 | SULT2A1   | -0.69 |
| hsa-mir-216 | SYNGR3    | -0.51 |
| hsa-mir-216 | SYTL1     | -0.44 |
| hsa-mir-216 | TBX10     | -0.69 |
| hsa-mir-216 | TDGF1     | -0.56 |
| hsa-mir-216 | TERT      | -0.61 |
| hsa-mir-216 | THSD3     | -0.51 |
| hsa-mir-216 | TJP3      | -0.63 |
| hsa-mir-216 | TM4SF5    | -0.59 |
| hsa-mir-216 | TMED6     | -0.58 |
| hsa-mir-216 | TMED9     | -0.45 |
| hsa-mir-216 | TMEM105   | -0.51 |
| hsa-mir-216 | TMEM16J   | -0.64 |
| hsa-mir-216 | TMEM63A   | -0.56 |
| hsa-mir-216 | TMEM83    | -0.61 |
| hsa-mir-216 | TMEM92    | -0.52 |
| hsa-mir-216 | TMOD2     | 0.54  |
| hsa-mir-216 | TMPRSS11F | 0     |
| hsa-mir-216 | TMPRSS4   | -0.67 |
| hsa-mir-216 | TNFRSF18  | -0.55 |
| hsa-mir-216 | TNFRSF4   | 0.49  |
| hsa-mir-216 | TNNC1     | -0.58 |
| hsa-mir-216 | TP53TG3   | -0.37 |
| hsa-mir-216 | TPO       | -0.49 |
| hsa-mir-216 | TPTE      | -0.53 |
| hsa-mir-216 | TRIM15    | -0.61 |
| hsa-mir-216 | TRIM49    | -0.46 |
| hsa-mir-216 | TRPA1     | -0.54 |
| hsa-mir-216 | TRPM1     | -0.74 |
| hsa-mir-216 | TSGA10    | 0.42  |
| hsa-mir-216 | TSPY2     | -0.7  |
| hsa-mir-216 | TTR       | -0.33 |
| hsa-mir-216 | TUBAL3    | -0.63 |
| hsa-mir-216 | TYR       | -0.54 |
| hsa-mir-216 | TYRP1     | -0.57 |
| hsa-mir-216 | UGT1A6    | -0.57 |
| hsa-mir-216 | UGT2B10   | -0.55 |
| hsa-mir-216 | UGT2B11   | -0.6  |
| hsa-mir-216 | UGT2B15   | -0.48 |
| hsa-mir-216 | UGT2B17   | -0.37 |
| hsa-mir-216 | UGT2B28   | -0.74 |
| hsa-mir-216 | UGT2B4    | -0.67 |
| hsa-mir-216 | UGT2B7    | -0.41 |
| hsa-mir-216 | UMODL1    | -0.5  |
| hsa-mir-216 | UNC93A    | -0.72 |
| hsa-mir-216 | USP44     | -0.47 |



|             |          |       |
|-------------|----------|-------|
| hsa-mir-216 | UTS2     | -0.48 |
| hsa-mir-216 | VIL1     | -0.7  |
| hsa-mir-216 | WASL     | 0.53  |
| hsa-mir-216 | WIT1     | -0.41 |
| hsa-mir-216 | XKR3     | -0.63 |
| hsa-mir-216 | YIPF3    | 0.46  |
| hsa-mir-216 | YIPF7    | 0.7   |
| hsa-mir-216 | ZFP42    | -0.61 |
| hsa-mir-216 | ZG16     | -0.66 |
| hsa-mir-216 | ZIC3     | -0.48 |
| hsa-mir-216 | ZNF366   | 0.63  |
| hsa-mir-216 | ZNF396   | 0.52  |
| hsa-mir-216 | ZNF501   | 0.4   |
| hsa-mir-216 | ZNF599   | 0.53  |
| hsa-mir-217 | AADAC    | -0.55 |
| hsa-mir-217 | ABCC2    | -0.6  |
| hsa-mir-217 | ABCG5    | -0.63 |
| hsa-mir-217 | ACF      | -0.63 |
| hsa-mir-217 | ACSM1    | -0.53 |
| hsa-mir-217 | ACSM2B   | -0.66 |
| hsa-mir-217 | ACSM3    | -0.61 |
| hsa-mir-217 | ACTBL1   | -0.64 |
| hsa-mir-217 | ACTC1    | -0.1  |
| hsa-mir-217 | ACTL8    | -0.66 |
| hsa-mir-217 | ADCY4    | 0.5   |
| hsa-mir-217 | ADH4     | -0.57 |
| hsa-mir-217 | ADH6     | -0.47 |
| hsa-mir-217 | AFP      | -0.57 |
| hsa-mir-217 | AGR2     | -0.57 |
| hsa-mir-217 | AHSG     | -0.49 |
| hsa-mir-217 | AK7      | -0.33 |
| hsa-mir-217 | AKAP3    | 0.3   |
| hsa-mir-217 | AKR1C1   | -0.45 |
| hsa-mir-217 | AKR1CL2  | -0.62 |
| hsa-mir-217 | ALAS2    | -0.44 |
| hsa-mir-217 | ALB      | -0.64 |
| hsa-mir-217 | ALS2CR11 | -0.3  |
| hsa-mir-217 | ALX1     | -0.47 |
| hsa-mir-217 | AMHR2    | -0.7  |
| hsa-mir-217 | AMPD1    | -0.45 |
| hsa-mir-217 | AMTN     | -0.6  |
| hsa-mir-217 | ANKRD21  | -0.56 |
| hsa-mir-217 | ANKRD38  | -0.26 |
| hsa-mir-217 | ANXA10   | -0.3  |
| hsa-mir-217 | ANXA9    | -0.49 |
| hsa-mir-217 | APOA2    | -0.58 |
| hsa-mir-217 | APOA5    | -0.66 |
| hsa-mir-217 | APOB     | -0.46 |
| hsa-mir-217 | APOC3    | -0.54 |
| hsa-mir-217 | APOF     | -0.5  |
| hsa-mir-217 | APOH     | -0.6  |
| hsa-mir-217 | AQP3     | -0.57 |
| hsa-mir-217 | AQP4     | 0.36  |

|             |           |       |
|-------------|-----------|-------|
| hsa-mir-217 | ARHGEF6   | 0.45  |
| hsa-mir-217 | ARL14     | -0.51 |
| hsa-mir-217 | ART4      | -0.71 |
| hsa-mir-217 | ASGR2     | -0.5  |
| hsa-mir-217 | ASTN1     | 0.42  |
| hsa-mir-217 | ATAD4     | -0.65 |
| hsa-mir-217 | ATP1B2    | 0.38  |
| hsa-mir-217 | ATP6V0A4  | -0.22 |
| hsa-mir-217 | AURKC     | -0.46 |
| hsa-mir-217 | BAAT      | -0.6  |
| hsa-mir-217 | BAIAP2L1  | -0.66 |
| hsa-mir-217 | BDKRB1    | -0.51 |
| hsa-mir-217 | BLK       | -0.27 |
| hsa-mir-217 | BMP4      | -0.42 |
| hsa-mir-217 | BMP5      | -0.32 |
| hsa-mir-217 | BSND      | -0.56 |
| hsa-mir-217 | C10orf122 | -0.68 |
| hsa-mir-217 | C10orf63  | 0.43  |
| hsa-mir-217 | C10orf82  | -0.56 |
| hsa-mir-217 | C10orf96  | -0.42 |
| hsa-mir-217 | C12orf56  | -0.46 |
| hsa-mir-217 | C14orf115 | -0.65 |
| hsa-mir-217 | C14orf152 | 0.38  |
| hsa-mir-217 | C14orf73  | -0.66 |
| hsa-mir-217 | C15orf26  | -0.22 |
| hsa-mir-217 | C16orf73  | -0.61 |
| hsa-mir-217 | C17orf87  | 0.42  |
| hsa-mir-217 | C18orf2   | -0.7  |
| hsa-mir-217 | C18orf34  | 0.54  |
| hsa-mir-217 | C19orf21  | -0.61 |
| hsa-mir-217 | C19orf46  | -0.46 |
| hsa-mir-217 | C1orf172  | -0.52 |
| hsa-mir-217 | C1orf58   | 0.46  |
| hsa-mir-217 | C1orf62   | 0.46  |
| hsa-mir-217 | C20orf26  | 0.56  |
| hsa-mir-217 | C21orf125 | -0.67 |
| hsa-mir-217 | C21orf62  | 0.41  |
| hsa-mir-217 | C21orf90  | -0.54 |
| hsa-mir-217 | C2orf48   | -0.47 |
| hsa-mir-217 | C3orf32   | -0.4  |
| hsa-mir-217 | C4BPA     | -0.39 |
| hsa-mir-217 | C4BPB     | -0.61 |
| hsa-mir-217 | C4orf7    | -0.3  |
| hsa-mir-217 | C5orf38   | -0.34 |
| hsa-mir-217 | C6orf156  | -0.4  |
| hsa-mir-217 | C8A       | -0.69 |
| hsa-mir-217 | C8B       | -0.62 |
| hsa-mir-217 | C9orf68   | 0.44  |
| hsa-mir-217 | C9orf98   | 0.42  |
| hsa-mir-217 | CALML3    | -0.49 |
| hsa-mir-217 | CALML5    | -0.66 |
| hsa-mir-217 | CAPN13    | -0.52 |
| hsa-mir-217 | CAPN6     | -0.49 |

|             |          |       |
|-------------|----------|-------|
| hsa-mir-217 | CAPN9    | -0.41 |
| hsa-mir-217 | CARD11   | -0.61 |
| hsa-mir-217 | CBLN1    | -0.26 |
| hsa-mir-217 | CCDC102B | 0.44  |
| hsa-mir-217 | CCDC26   | -0.39 |
| hsa-mir-217 | CD163    | 0.31  |
| hsa-mir-217 | CD1A     | -0.47 |
| hsa-mir-217 | CD1C     | -0.42 |
| hsa-mir-217 | CD1E     | -0.54 |
| hsa-mir-217 | CD34     | 0.51  |
| hsa-mir-217 | CD55     | -0.46 |
| hsa-mir-217 | CD8B     | -0.59 |
| hsa-mir-217 | CD93     | 0.44  |
| hsa-mir-217 | CDH16    | -0.66 |
| hsa-mir-217 | CDH9     | -0.43 |
| hsa-mir-217 | CEACAM1  | -0.61 |
| hsa-mir-217 | CEACAM5  | -0.67 |
| hsa-mir-217 | CEACAM6  | -0.61 |
| hsa-mir-217 | CES1     | -0.45 |
| hsa-mir-217 | CFP      | 0.38  |
| hsa-mir-217 | CGA      | -0.59 |
| hsa-mir-217 | CHRNA3   | -0.04 |
| hsa-mir-217 | CLCA2    | -0.63 |
| hsa-mir-217 | CLDN14   | -0.42 |
| hsa-mir-217 | CLDN6    | -0.64 |
| hsa-mir-217 | CLEC14A  | 0.41  |
| hsa-mir-217 | CLEC4E   | 0.36  |
| hsa-mir-217 | CLRN3    | 0.46  |
| hsa-mir-217 | CLSTN3   | -0.56 |
| hsa-mir-217 | COL2A1   | -0.55 |
| hsa-mir-217 | CPB2     | -0.61 |
| hsa-mir-217 | CPN1     | -0.67 |
| hsa-mir-217 | CR1L     | -0.5  |
| hsa-mir-217 | CREB3L3  | -0.67 |
| hsa-mir-217 | CRTAM    | 0.49  |
| hsa-mir-217 | CRYBA1   | -0.16 |
| hsa-mir-217 | CSN1S1   | -0.39 |
| hsa-mir-217 | CTCFL    | -0.64 |
| hsa-mir-217 | CTSO     | 0.38  |
| hsa-mir-217 | CXorf36  | 0.55  |
| hsa-mir-217 | CYP1A1   | -0.68 |
| hsa-mir-217 | CYP24A1  | -0.54 |
| hsa-mir-217 | CYP2F1   | -0.72 |
| hsa-mir-217 | DAZL     | -0.17 |
| hsa-mir-217 | DCT      | -0.31 |
| hsa-mir-217 | DDX3Y    | -0.18 |
| hsa-mir-217 | DEFB103A | -0.33 |
| hsa-mir-217 | DERL3    | -0.64 |
| hsa-mir-217 | DGAT2    | -0.44 |
| hsa-mir-217 | DIO1     | -0.55 |
| hsa-mir-217 | DLK1     | -0.29 |
| hsa-mir-217 | DMBX1    | -0.43 |
| hsa-mir-217 | DMRTA1   | -0.11 |

|             |          |       |
|-------------|----------|-------|
| hsa-mir-217 | DNAH10   | 0.48  |
| hsa-mir-217 | DNAH7    | 0.46  |
| hsa-mir-217 | DNAH8    | -0.54 |
| hsa-mir-217 | DNASE2B  | 0.45  |
| hsa-mir-217 | DNMT3L   | -0.64 |
| hsa-mir-217 | DOHH     | -0.55 |
| hsa-mir-217 | DPPA2    | -0.46 |
| hsa-mir-217 | DPPA4    | -0.32 |
| hsa-mir-217 | DPYSL5   | 0.64  |
| hsa-mir-217 | DQX1     | -0.54 |
| hsa-mir-217 | DSCR6    | -0.33 |
| hsa-mir-217 | DSCR8    | -0.66 |
| hsa-mir-217 | DSG2     | -0.54 |
| hsa-mir-217 | DUSP13   | -0.41 |
| hsa-mir-217 | ECEL1    | -0.19 |
| hsa-mir-217 | ELA2A    | -0.37 |
| hsa-mir-217 | ELA3A    | -0.58 |
| hsa-mir-217 | ELN      | 0.5   |
| hsa-mir-217 | ELTD1    | 0.53  |
| hsa-mir-217 | EMCN     | 0.44  |
| hsa-mir-217 | ENPP3    | -0.52 |
| hsa-mir-217 | EPGN     | -0.67 |
| hsa-mir-217 | EPS8L1   | -0.45 |
| hsa-mir-217 | ESX1     | -0.63 |
| hsa-mir-217 | F10      | -0.49 |
| hsa-mir-217 | F13B     | -0.34 |
| hsa-mir-217 | F2       | -0.59 |
| hsa-mir-217 | F3       | 0.4   |
| hsa-mir-217 | FABP1    | -0.44 |
| hsa-mir-217 | FAIM3    | -0.48 |
| hsa-mir-217 | FAM112B  | -0.48 |
| hsa-mir-217 | FAM130A2 | 0.45  |
| hsa-mir-217 | FAM83A   | -0.74 |
| hsa-mir-217 | FAM83B   | -0.67 |
| hsa-mir-217 | FAM9B    | -0.69 |
| hsa-mir-217 | FBXL21   | -0.7  |
| hsa-mir-217 | FGA      | -0.63 |
| hsa-mir-217 | FGB      | -0.63 |
| hsa-mir-217 | FGF19    | -0.55 |
| hsa-mir-217 | FGF23    | -0.47 |
| hsa-mir-217 | FGG      | -0.6  |
| hsa-mir-217 | FGL1     | -0.46 |
| hsa-mir-217 | FGL2     | 0.46  |
| hsa-mir-217 | FHL5     | 0.54  |
| hsa-mir-217 | FLJ21075 | -0.67 |
| hsa-mir-217 | FLJ25801 | -0.48 |
| hsa-mir-217 | FLJ32658 | -0.56 |
| hsa-mir-217 | FLJ34047 | -0.53 |
| hsa-mir-217 | FLJ35880 | -0.6  |
| hsa-mir-217 | FLJ36208 | -0.57 |
| hsa-mir-217 | FLJ40298 | 0.45  |
| hsa-mir-217 | FLJ40504 | -0.41 |
| hsa-mir-217 | FLJ46111 | -0.59 |

|             |         |       |
|-------------|---------|-------|
| hsa-mir-217 | FOXA1   | -0.43 |
| hsa-mir-217 | FOXA2   | -0.55 |
| hsa-mir-217 | FOXA3   | -0.5  |
| hsa-mir-217 | FRRS1   | -0.43 |
| hsa-mir-217 | FTCD    | -0.67 |
| hsa-mir-217 | FUS     | -0.4  |
| hsa-mir-217 | FUT3    | -0.42 |
| hsa-mir-217 | G6PC    | -0.62 |
| hsa-mir-217 | GABRE   | -0.33 |
| hsa-mir-217 | GABRG3  | -0.43 |
| hsa-mir-217 | GAGE1   | -0.63 |
| hsa-mir-217 | GATA2   | -0.63 |
| hsa-mir-217 | GATA3   | -0.46 |
| hsa-mir-217 | GCNT3   | -0.64 |
| hsa-mir-217 | GDF3    | -0.48 |
| hsa-mir-217 | GDF6    | -0.47 |
| hsa-mir-217 | GDPD5   | -0.47 |
| hsa-mir-217 | GFI1    | -0.48 |
| hsa-mir-217 | GFI1B   | -0.69 |
| hsa-mir-217 | GJA4    | 0.5   |
| hsa-mir-217 | GJB7    | -0.63 |
| hsa-mir-217 | GJE1    | -0.22 |
| hsa-mir-217 | GLRA3   | -0.37 |
| hsa-mir-217 | GLULD1  | -0.2  |
| hsa-mir-217 | GLYATL1 | -0.28 |
| hsa-mir-217 | GNA13   | 0.52  |
| hsa-mir-217 | GPER    | 0.46  |
| hsa-mir-217 | GPR1    | -0.14 |
| hsa-mir-217 | GPR116  | 0.42  |
| hsa-mir-217 | GPR157  | -0.53 |
| hsa-mir-217 | GPR174  | -0.48 |
| hsa-mir-217 | GPR34   | 0.43  |
| hsa-mir-217 | GPR4    | 0.48  |
| hsa-mir-217 | GPR75   | 0.58  |
| hsa-mir-217 | GPR84   | 0.45  |
| hsa-mir-217 | GPX2    | -0.63 |
| hsa-mir-217 | GRAP2   | -0.5  |
| hsa-mir-217 | GRHL2   | -0.46 |
| hsa-mir-217 | GRIA3   | 0.38  |
| hsa-mir-217 | GRIK4   | 0.45  |
| hsa-mir-217 | GSTA2   | -0.36 |
| hsa-mir-217 | GSTA3   | -0.58 |
| hsa-mir-217 | GSTA5   | -0.51 |
| hsa-mir-217 | GUCY1A2 | 0.38  |
| hsa-mir-217 | GYPA    | -0.43 |
| hsa-mir-217 | GYPB    | -0.75 |
| hsa-mir-217 | GYPC    | -0.55 |
| hsa-mir-217 | GYPE    | -0.7  |
| hsa-mir-217 | HAL     | -0.24 |
| hsa-mir-217 | HAND1   | -0.67 |
| hsa-mir-217 | HBE1    | -0.49 |
| hsa-mir-217 | HBG2    | -0.58 |
| hsa-mir-217 | HDAC10  | -0.48 |

|             |           |       |
|-------------|-----------|-------|
| hsa-mir-217 | HEMGN     | -0.5  |
| hsa-mir-217 | HEPACAM   | 0.33  |
| hsa-mir-217 | HFE2      | -0.59 |
| hsa-mir-217 | HIGD1B    | 0.36  |
| hsa-mir-217 | HNRNPA0   | -0.34 |
| hsa-mir-217 | HOOK1     | -0.46 |
| hsa-mir-217 | HORMAD1   | -0.48 |
| hsa-mir-217 | HORMAD2   | 0.55  |
| hsa-mir-217 | HOXB8     | -0.3  |
| hsa-mir-217 | HOXB9     | -0.52 |
| hsa-mir-217 | HOXC12    | -0.44 |
| hsa-mir-217 | HPDL      | -0.51 |
| hsa-mir-217 | HPN       | -0.57 |
| hsa-mir-217 | HSD17B2   | -0.42 |
| hsa-mir-217 | HSH2D     | -0.6  |
| hsa-mir-217 | HSPC105   | -0.23 |
| hsa-mir-217 | HTR1E     | -0.4  |
| hsa-mir-217 | ICAM4     | -0.66 |
| hsa-mir-217 | ICEBERG   | -0.39 |
| hsa-mir-217 | IGF2      | -0.28 |
| hsa-mir-217 | IGF2BP1   | -0.61 |
| hsa-mir-217 | IGFBPL1   | -0.18 |
| hsa-mir-217 | IGLV2-14  | -0.71 |
| hsa-mir-217 | IGSF6     | 0.44  |
| hsa-mir-217 | IL11      | -0.43 |
| hsa-mir-217 | IL1A      | 0.44  |
| hsa-mir-217 | IL22RA1   | -0.56 |
| hsa-mir-217 | IL23R     | -0.69 |
| hsa-mir-217 | IL25      | 0.46  |
| hsa-mir-217 | IL33      | 0.45  |
| hsa-mir-217 | INSL4     | -0.55 |
| hsa-mir-217 | INSL5     | 0.62  |
| hsa-mir-217 | IRX1      | -0.01 |
| hsa-mir-217 | IRX2      | -0.23 |
| hsa-mir-217 | ISL1      | -0.37 |
| hsa-mir-217 | ISX       | -0.58 |
| hsa-mir-217 | ITGB1BP3  | -0.44 |
| hsa-mir-217 | ITIH3     | -0.59 |
| hsa-mir-217 | JARID1D   | -0.15 |
| hsa-mir-217 | KCNG3     | -0.63 |
| hsa-mir-217 | KCNK13    | 0.54  |
| hsa-mir-217 | KCNK5     | -0.46 |
| hsa-mir-217 | KDR       | 0.55  |
| hsa-mir-217 | KIAA0825  | -0.56 |
| hsa-mir-217 | KIAA1086  | -0.36 |
| hsa-mir-217 | KIAA1383  | 0.46  |
| hsa-mir-217 | KIAA1822L | -0.33 |
| hsa-mir-217 | KIAA1909  | -0.3  |
| hsa-mir-217 | KIFC3     | -0.58 |
| hsa-mir-217 | KLF1      | -0.69 |
| hsa-mir-217 | KLF7      | 0.49  |
| hsa-mir-217 | KLK1      | -0.62 |
| hsa-mir-217 | KLK10     | -0.57 |

|             |             |       |
|-------------|-------------|-------|
| hsa-mir-217 | KLK11       | -0.6  |
| hsa-mir-217 | KLK12       | -0.45 |
| hsa-mir-217 | KLK8        | -0.61 |
| hsa-mir-217 | KLRB1       | 0.46  |
| hsa-mir-217 | KLRC4       | -0.27 |
| hsa-mir-217 | KNG1        | -0.45 |
| hsa-mir-217 | KRT12       | -0.51 |
| hsa-mir-217 | KRT13       | -0.61 |
| hsa-mir-217 | KRT15       | -0.36 |
| hsa-mir-217 | KRT16       | -0.63 |
| hsa-mir-217 | KRT23       | -0.46 |
| hsa-mir-217 | KRT33A      | -0.67 |
| hsa-mir-217 | KRT34       | -0.55 |
| hsa-mir-217 | KRT37       | -0.66 |
| hsa-mir-217 | KRT6A       | -0.65 |
| hsa-mir-217 | KRT6B       | -0.49 |
| hsa-mir-217 | KRT6C       | -0.71 |
| hsa-mir-217 | KRT75       | -0.1  |
| hsa-mir-217 | KRT80       | -0.46 |
| hsa-mir-217 | KRT86       | -0.7  |
| hsa-mir-217 | KRTAP1-5    | -0.62 |
| hsa-mir-217 | KRTAP3-1    | -0.64 |
| hsa-mir-217 | KRTDAP      | -0.67 |
| hsa-mir-217 | L1TD1       | -0.54 |
| hsa-mir-217 | LAMA2       | 0.38  |
| hsa-mir-217 | LCK         | -0.48 |
| hsa-mir-217 | LCT         | -0.66 |
| hsa-mir-217 | LDHC        | -0.37 |
| hsa-mir-217 | LDLRAD1     | -0.72 |
| hsa-mir-217 | LIN28       | -0.62 |
| hsa-mir-217 | LIN28B      | -0.51 |
| hsa-mir-217 | 22NC03-75B3 | -0.53 |
| hsa-mir-217 | LMOD1       | 0.47  |
| hsa-mir-217 | LOC129293   | -0.61 |
| hsa-mir-217 | LOC253012   | -0.24 |
| hsa-mir-217 | LOC399900   | -0.38 |
| hsa-mir-217 | LOC441376   | -0.41 |
| hsa-mir-217 | LOC441601   | -0.73 |
| hsa-mir-217 | LOC91461    | -0.55 |
| hsa-mir-217 | LRP1B       | 0.39  |
| hsa-mir-217 | LRRC4B      | 0.44  |
| hsa-mir-217 | LTB4R       | -0.68 |
| hsa-mir-217 | MAEL        | 0.47  |
| hsa-mir-217 | MAGEA1      | -0.46 |
| hsa-mir-217 | MAGEA10     | -0.59 |
| hsa-mir-217 | MAGEA4      | -0.55 |
| hsa-mir-217 | MAGEA5      | -0.62 |
| hsa-mir-217 | MAGEA8      | -0.72 |
| hsa-mir-217 | MAGEA9      | -0.53 |
| hsa-mir-217 | MAGEB2      | -0.44 |
| hsa-mir-217 | MAGEB6      | -0.55 |
| hsa-mir-217 | MAGEC1      | -0.54 |
| hsa-mir-217 | MAGEC2      | -0.42 |

|             |           |       |
|-------------|-----------|-------|
| hsa-mir-217 | MAGEE2    | 0.4   |
| hsa-mir-217 | MAP2      | 0.46  |
| hsa-mir-217 | MAP2K7    | 0.52  |
| hsa-mir-217 | MAPK12    | -0.53 |
| hsa-mir-217 | MAT1A     | -0.45 |
| hsa-mir-217 | MBL2      | -0.58 |
| hsa-mir-217 | MED18     | -0.2  |
| hsa-mir-217 | MFAP3L    | 0.38  |
| hsa-mir-217 | MGC102966 | -0.52 |
| hsa-mir-217 | MGC10981  | -0.63 |
| hsa-mir-217 | MGC45800  | -0.32 |
| hsa-mir-217 | MIA2      | -0.62 |
| hsa-mir-217 | MIPOL1    | -0.47 |
| hsa-mir-217 | MIRH1     | -0.51 |
| hsa-mir-217 | MLANA     | -0.56 |
| hsa-mir-217 | MLPH      | -0.45 |
| hsa-mir-217 | MME       | -0.33 |
| hsa-mir-217 | MMP12     | -0.1  |
| hsa-mir-217 | MMRN1     | 0.58  |
| hsa-mir-217 | MOCOS     | -0.38 |
| hsa-mir-217 | MPZL3     | -0.57 |
| hsa-mir-217 | MRGPRX3   | -0.67 |
| hsa-mir-217 | MS4A1     | -0.62 |
| hsa-mir-217 | MS4A3     | -0.7  |
| hsa-mir-217 | MSLN      | -0.46 |
| hsa-mir-217 | MSMB      | -0.72 |
| hsa-mir-217 | MST101    | 0.33  |
| hsa-mir-217 | MSX2      | -0.53 |
| hsa-mir-217 | MTMR8     | -0.7  |
| hsa-mir-217 | MUC15     | -0.38 |
| hsa-mir-217 | MUC16     | -0.66 |
| hsa-mir-217 | MYCT1     | 0.49  |
| hsa-mir-217 | MYEOV     | -0.63 |
| hsa-mir-217 | MYH2      | -0.61 |
| hsa-mir-217 | MYL1      | -0.52 |
| hsa-mir-217 | MYL7      | -0.74 |
| hsa-mir-217 | MYLC2PL   | -0.61 |
| hsa-mir-217 | MYO1A     | -0.56 |
| hsa-mir-217 | MYPN      | -0.5  |
| hsa-mir-217 | NANOGP1   | -0.57 |
| hsa-mir-217 | NAT8      | -0.66 |
| hsa-mir-217 | NDST4     | -0.49 |
| hsa-mir-217 | NFASC     | 0.46  |
| hsa-mir-217 | NFE2      | -0.45 |
| hsa-mir-217 | NLRP7     | -0.59 |
| hsa-mir-217 | NOTUM     | -0.53 |
| hsa-mir-217 | NOX5      | -0.65 |
| hsa-mir-217 | NPFFR2    | -0.58 |
| hsa-mir-217 | NPM3      | -0.51 |
| hsa-mir-217 | NR0B2     | -0.62 |
| hsa-mir-217 | NR1H4     | -0.45 |
| hsa-mir-217 | NRG4      | -0.76 |
| hsa-mir-217 | NS3BP     | -0.44 |



|             |          |       |
|-------------|----------|-------|
| hsa-mir-217 | NTF3     | -0.58 |
| hsa-mir-217 | NTRK2    | 0.43  |
| hsa-mir-217 | NUP210L  | -0.58 |
| hsa-mir-217 | ODAM     | -0.61 |
| hsa-mir-217 | OR1D2    | -0.82 |
| hsa-mir-217 | OR2T2    | 0.65  |
| hsa-mir-217 | OR51B5   | -0.7  |
| hsa-mir-217 | OR51E1   | 0.58  |
| hsa-mir-217 | OR51I1   | -0.69 |
| hsa-mir-217 | OSTalpha | -0.54 |
| hsa-mir-217 | OTX2     | -0.69 |
| hsa-mir-217 | OVOL2    | -0.35 |
| hsa-mir-217 | P2RY10   | -0.41 |
| hsa-mir-217 | PADI2    | 0.34  |
| hsa-mir-217 | PAEP     | -0.48 |
| hsa-mir-217 | PAGE1    | -0.63 |
| hsa-mir-217 | PAGE2    | -0.48 |
| hsa-mir-217 | PAPPA    | -0.51 |
| hsa-mir-217 | PASD1    | -0.51 |
| hsa-mir-217 | PAX9     | -0.59 |
| hsa-mir-217 | PCDHB10  | 0.42  |
| hsa-mir-217 | PCK1     | -0.37 |
| hsa-mir-217 | PCSK9    | -0.51 |
| hsa-mir-217 | PDILT    | -0.6  |
| hsa-mir-217 | PF4      | 0.4   |
| hsa-mir-217 | PIAS4    | -0.58 |
| hsa-mir-217 | PITPNM1  | -0.54 |
| hsa-mir-217 | PIWIL2   | -0.65 |
| hsa-mir-217 | PKLR     | -0.62 |
| hsa-mir-217 | PKP2     | -0.49 |
| hsa-mir-217 | PLA1A    | -0.5  |
| hsa-mir-217 | PLA2G12B | -0.55 |
| hsa-mir-217 | PLA2G3   | -0.52 |
| hsa-mir-217 | PLAC1    | -0.41 |
| hsa-mir-217 | PLEKHN1  | -0.53 |
| hsa-mir-217 | PLXDC1   | 0.51  |
| hsa-mir-217 | PNLIPRP2 | -0.57 |
| hsa-mir-217 | POTE15   | -0.62 |
| hsa-mir-217 | POU5F1P3 | -0.58 |
| hsa-mir-217 | POU5F1P4 | -0.47 |
| hsa-mir-217 | PPAP2C   | -0.44 |
| hsa-mir-217 | PRAMEF8  | -0.6  |
| hsa-mir-217 | PRAP1    | -0.7  |
| hsa-mir-217 | PRDM7    | -0.65 |
| hsa-mir-217 | PRDM9    | -0.7  |
| hsa-mir-217 | PRG2     | -0.4  |
| hsa-mir-217 | PROC     | -0.57 |
| hsa-mir-217 | PRODH2   | -0.65 |
| hsa-mir-217 | PRSS1    | -0.72 |
| hsa-mir-217 | PRSS2    | -0.68 |
| hsa-mir-217 | PRSS21   | -0.58 |
| hsa-mir-217 | PRSS3    | -0.56 |
| hsa-mir-217 | PRSS7    | -0.54 |

|             |             |       |
|-------------|-------------|-------|
| hsa-mir-217 | PSG6        | -0.63 |
| hsa-mir-217 | PTGFR       | -0.57 |
| hsa-mir-217 | PTPRU       | -0.43 |
| hsa-mir-217 | RAB1B       | 0.4   |
| hsa-mir-217 | RAB25       | -0.56 |
| hsa-mir-217 | RAET1E      | -0.68 |
| hsa-mir-217 | RASGRP3     | 0.48  |
| hsa-mir-217 | RBM35B      | -0.51 |
| hsa-mir-217 | RFTN2       | 0.51  |
| hsa-mir-217 | RFX4        | 0.45  |
| hsa-mir-217 | RHAG        | -0.54 |
| hsa-mir-217 | RHD         | -0.55 |
| hsa-mir-217 | RHEBL1      | -0.61 |
| hsa-mir-217 | RHOV        | -0.66 |
| hsa-mir-217 | RIPK4       | -0.33 |
| hsa-mir-217 | RNF152      | 0.5   |
| hsa-mir-217 | RNF183      | -0.59 |
| hsa-mir-217 | RNF212      | -0.54 |
| hsa-mir-217 | ROBO2       | 0.44  |
| hsa-mir-217 | ROBO4       | 0.36  |
| hsa-mir-217 | ROS1        | -0.46 |
| hsa-mir-217 | RP13-36C9.6 | -0.5  |
| hsa-mir-217 | RPS6KA6     | -0.14 |
| hsa-mir-217 | RSBN1       | 0.44  |
| hsa-mir-217 | RTBDN       | 0.39  |
| hsa-mir-217 | RTP3        | -0.36 |
| hsa-mir-217 | S100A14     | -0.56 |
| hsa-mir-217 | S100A2      | 0.6   |
| hsa-mir-217 | SAGE1       | -0.55 |
| hsa-mir-217 | SEC14L4     | -0.58 |
| hsa-mir-217 | SEMA3G      | -0.65 |
| hsa-mir-217 | SERPINA10   | -0.56 |
| hsa-mir-217 | SERPINA11   | -0.71 |
| hsa-mir-217 | SERPINA4    | -0.7  |
| hsa-mir-217 | SERPINA6    | -0.65 |
| hsa-mir-217 | SERPINA7    | -0.61 |
| hsa-mir-217 | SERPINB2    | -0.6  |
| hsa-mir-217 | SERPINB3    | -0.68 |
| hsa-mir-217 | SERPINB4    | -0.66 |
| hsa-mir-217 | SERPINB5    | -0.66 |
| hsa-mir-217 | SERPINC1    | -0.37 |
| hsa-mir-217 | SERPIND1    | -0.52 |
| hsa-mir-217 | SFTPA1      | -0.55 |
| hsa-mir-217 | SH2D3A      | -0.62 |
| hsa-mir-217 | SH3RF2      | -0.49 |
| hsa-mir-217 | SKP2        | -0.41 |
| hsa-mir-217 | SLAMF1      | 0.42  |
| hsa-mir-217 | SLC10A6     | 0.46  |
| hsa-mir-217 | SLC12A3     | -0.7  |
| hsa-mir-217 | SLC17A2     | -0.74 |
| hsa-mir-217 | SLC18A1     | -0.39 |
| hsa-mir-217 | SLC1A6      | -0.4  |
| hsa-mir-217 | SLC23A1     | -0.66 |

|             |          |       |
|-------------|----------|-------|
| hsa-mir-217 | SLC25A21 | -0.53 |
| hsa-mir-217 | SLC2A2   | -0.6  |
| hsa-mir-217 | SLC30A8  | -0.57 |
| hsa-mir-217 | SLC39A5  | -0.63 |
| hsa-mir-217 | SLC39A6  | 0.43  |
| hsa-mir-217 | SLC44A4  | -0.67 |
| hsa-mir-217 | SLC45A2  | -0.76 |
| hsa-mir-217 | SLC6A14  | -0.45 |
| hsa-mir-217 | SLC6A4   | -0.71 |
| hsa-mir-217 | SLC7A3   | -0.33 |
| hsa-mir-217 | SLCO1B1  | -0.44 |
| hsa-mir-217 | SLCO1B3  | -0.51 |
| hsa-mir-217 | SLITRK6  | -0.2  |
| hsa-mir-217 | SMARCD2  | -0.48 |
| hsa-mir-217 | SMC1B    | -0.19 |
| hsa-mir-217 | SMCR5    | -0.61 |
| hsa-mir-217 | SMPDL3B  | -0.64 |
| hsa-mir-217 | SNX16    | 0.46  |
| hsa-mir-217 | SOAT2    | -0.55 |
| hsa-mir-217 | SOST     | -0.08 |
| hsa-mir-217 | SPANXC   | -0.54 |
| hsa-mir-217 | SPANXD   | -0.48 |
| hsa-mir-217 | SPATA1   | 0.5   |
| hsa-mir-217 | SPINK4   | -0.62 |
| hsa-mir-217 | SPINK5   | -0.62 |
| hsa-mir-217 | SPINK5L3 | -0.39 |
| hsa-mir-217 | SPRR1B   | -0.8  |
| hsa-mir-217 | SPRR2D   | -0.7  |
| hsa-mir-217 | SPRR3    | -0.6  |
| hsa-mir-217 | SPTA1    | -0.46 |
| hsa-mir-217 | SSX1     | -0.68 |
| hsa-mir-217 | SSX7     | -0.59 |
| hsa-mir-217 | STGC3    | -0.59 |
| hsa-mir-217 | STOML2   | -0.43 |
| hsa-mir-217 | SUHW1    | -0.57 |
| hsa-mir-217 | SULT1C4  | 0.73  |
| hsa-mir-217 | SULT2A1  | -0.67 |
| hsa-mir-217 | SUNC1    | -0.34 |
| hsa-mir-217 | SVEP1    | 0.15  |
| hsa-mir-217 | SYNGR3   | -0.51 |
| hsa-mir-217 | SYTL1    | -0.44 |
| hsa-mir-217 | TBX10    | -0.67 |
| hsa-mir-217 | TDGF1    | -0.55 |
| hsa-mir-217 | TERT     | -0.6  |
| hsa-mir-217 | TFAP2B   | 0.03  |
| hsa-mir-217 | THSD3    | -0.5  |
| hsa-mir-217 | THSD7A   | 0.36  |
| hsa-mir-217 | TJP3     | -0.63 |
| hsa-mir-217 | TM4SF18  | 0.35  |
| hsa-mir-217 | TM4SF5   | -0.57 |
| hsa-mir-217 | TMC5     | -0.33 |
| hsa-mir-217 | TMED6    | -0.55 |
| hsa-mir-217 | TMED9    | -0.44 |

|             |           |       |
|-------------|-----------|-------|
| hsa-mir-217 | TMEM105   | -0.5  |
| hsa-mir-217 | TMEM16J   | -0.64 |
| hsa-mir-217 | TMEM190   | -0.35 |
| hsa-mir-217 | TMEM63A   | -0.55 |
| hsa-mir-217 | TMEM83    | -0.6  |
| hsa-mir-217 | TMEM92    | -0.52 |
| hsa-mir-217 | TMIE      | 0.32  |
| hsa-mir-217 | TMOD2     | 0.53  |
| hsa-mir-217 | TMPRSS11F | 0.02  |
| hsa-mir-217 | TMPRSS4   | -0.66 |
| hsa-mir-217 | TNFRSF17  | -0.45 |
| hsa-mir-217 | TNFRSF18  | -0.55 |
| hsa-mir-217 | TNFRSF4   | 0.46  |
| hsa-mir-217 | TNNC1     | -0.57 |
| hsa-mir-217 | TP53TG3   | -0.36 |
| hsa-mir-217 | TPO       | -0.49 |
| hsa-mir-217 | TPTE      | -0.51 |
| hsa-mir-217 | TRIM15    | -0.61 |
| hsa-mir-217 | TRIM49    | -0.45 |
| hsa-mir-217 | TRPA1     | -0.53 |
| hsa-mir-217 | TRPM1     | -0.72 |
| hsa-mir-217 | TSGA10    | 0.41  |
| hsa-mir-217 | TSPY2     | -0.68 |
| hsa-mir-217 | TTR       | -0.31 |
| hsa-mir-217 | TUBAL3    | -0.62 |
| hsa-mir-217 | TYR       | -0.53 |
| hsa-mir-217 | TYRP1     | -0.56 |
| hsa-mir-217 | UGT1A6    | -0.56 |
| hsa-mir-217 | UGT2B10   | -0.54 |
| hsa-mir-217 | UGT2B11   | -0.59 |
| hsa-mir-217 | UGT2B15   | -0.47 |
| hsa-mir-217 | UGT2B17   | -0.36 |
| hsa-mir-217 | UGT2B28   | -0.72 |
| hsa-mir-217 | UGT2B4    | -0.66 |
| hsa-mir-217 | UGT2B7    | -0.4  |
| hsa-mir-217 | UMODL1    | -0.49 |
| hsa-mir-217 | UNC93A    | -0.71 |
| hsa-mir-217 | USP44     | -0.46 |
| hsa-mir-217 | UTS2      | -0.47 |
| hsa-mir-217 | VIL1      | -0.69 |
| hsa-mir-217 | VSTM3     | 0.46  |
| hsa-mir-217 | VTCN1     | -0.16 |
| hsa-mir-217 | WASL      | 0.53  |
| hsa-mir-217 | WBSCR22   | -0.39 |
| hsa-mir-217 | WIT1      | -0.4  |
| hsa-mir-217 | WT1       | -0.27 |
| hsa-mir-217 | XKR3      | -0.62 |
| hsa-mir-217 | YIPF3     | 0.43  |
| hsa-mir-217 | YIPF7     | 0.68  |
| hsa-mir-217 | ZFP42     | -0.59 |
| hsa-mir-217 | ZG16      | -0.65 |
| hsa-mir-217 | ZIC3      | -0.47 |
| hsa-mir-217 | ZMYND12   | 0.4   |

|             |           |       |
|-------------|-----------|-------|
| hsa-mir-217 | ZNF366    | 0.62  |
| hsa-mir-217 | ZNF396    | 0.5   |
| hsa-mir-217 | ZNF556    | -0.19 |
| hsa-mir-217 | ZNF599    | 0.52  |
| hsa-mir-217 | ZNF615    | 0.43  |
| hsa-mir-217 | ZNF750    | -0.37 |
| hsa-mir-217 | ZNF790    | 0.47  |
| hsa-mir-217 | ZP3       | -0.36 |
| hsa-mir-218 | March11   | 0.64  |
| hsa-mir-218 | Sept3     | 0.58  |
| hsa-mir-218 | Sept5     | 0.66  |
| hsa-mir-218 | A2BP1     | 0.74  |
| hsa-mir-218 | ABCC12    | 0.64  |
| hsa-mir-218 | ABCG4     | 0.61  |
| hsa-mir-218 | ABLIM2    | 0.67  |
| hsa-mir-218 | ACCN1     | 0.72  |
| hsa-mir-218 | ADAM11    | 0.66  |
| hsa-mir-218 | ADARB1    | 0.49  |
| hsa-mir-218 | ADARB2    | 0.55  |
| hsa-mir-218 | ADCYAP1   | 0.58  |
| hsa-mir-218 | ADRBK2    | 0.5   |
| hsa-mir-218 | AK5       | 0.7   |
| hsa-mir-218 | AKAP6     | 0.61  |
| hsa-mir-218 | AMPH      | 0.65  |
| hsa-mir-218 | ANK3      | 0.58  |
| hsa-mir-218 | ANKRD43   | 0.58  |
| hsa-mir-218 | ARHGDI3   | 0.7   |
| hsa-mir-218 | ARPP-21   | 0.58  |
| hsa-mir-218 | ATOH7     | 0.65  |
| hsa-mir-218 | ATP2B2    | 0.6   |
| hsa-mir-218 | ATP2B3    | 0.79  |
| hsa-mir-218 | ATP6V1G2  | 0.56  |
| hsa-mir-218 | ATRNL1    | 0.57  |
| hsa-mir-218 | B3GNT4    | 0.42  |
| hsa-mir-218 | BEX5      | 0.63  |
| hsa-mir-218 | BRUNOL4   | 0.75  |
| hsa-mir-218 | BRUNOL5   | 0.75  |
| hsa-mir-218 | BSN       | 0.64  |
| hsa-mir-218 | BZRAP1    | 0.51  |
| hsa-mir-218 | C13orf16  | 0.61  |
| hsa-mir-218 | C14orf162 | 0.59  |
| hsa-mir-218 | C19orf30  | 0.62  |
| hsa-mir-218 | C1orf115  | 0.68  |
| hsa-mir-218 | C1orf173  | 0.38  |
| hsa-mir-218 | C1QL3     | 0.7   |
| hsa-mir-218 | C1QTNF4   | 0.66  |
| hsa-mir-218 | C20orf174 | 0.73  |
| hsa-mir-218 | C5orf40   | 0.66  |
| hsa-mir-218 | C6orf114  | 0.64  |
| hsa-mir-218 | C9orf4    | 0.62  |
| hsa-mir-218 | CA10      | 0.5   |
| hsa-mir-218 | CA11      | 0.61  |
| hsa-mir-218 | CABP1     | 0.72  |

|             |          |      |
|-------------|----------|------|
| hsa-mir-218 | CACNA2D3 | 0.63 |
| hsa-mir-218 | CACNB1   | 0.74 |
| hsa-mir-218 | CACNG2   | 0.7  |
| hsa-mir-218 | CACNG3   | 0.76 |
| hsa-mir-218 | CALB2    | 0.54 |
| hsa-mir-218 | CAMK1G   | 0.64 |
| hsa-mir-218 | CAMK2A   | 0.69 |
| hsa-mir-218 | CAMKV    | 0.62 |
| hsa-mir-218 | CAMTA1   | 0.54 |
| hsa-mir-218 | CARTPT   | 0.68 |
| hsa-mir-218 | CBLN2    | 0.72 |
| hsa-mir-218 | CCDC85A  | 0.66 |
| hsa-mir-218 | CCK      | 0.61 |
| hsa-mir-218 | CCKBR    | 0.65 |
| hsa-mir-218 | CDH12    | 0.65 |
| hsa-mir-218 | CDH18    | 0.61 |
| hsa-mir-218 | CDH8     | 0.74 |
| hsa-mir-218 | CDH9     | 0.57 |
| hsa-mir-218 | CDKL2    | 0.61 |
| hsa-mir-218 | CDKL5    | 0.7  |
| hsa-mir-218 | CDR1     | 0.54 |
| hsa-mir-218 | CECR6    | 0.53 |
| hsa-mir-218 | CHD5     | 0.73 |
| hsa-mir-218 | CHGA     | 0.65 |
| hsa-mir-218 | CHN1     | 0.63 |
| hsa-mir-218 | CLCA4    | 0.51 |
| hsa-mir-218 | CLCN4    | 0.64 |
| hsa-mir-218 | CLEC2L   | 0.71 |
| hsa-mir-218 | CLIC5    | 0.52 |
| hsa-mir-218 | CLTB     | 0.71 |
| hsa-mir-218 | CNKSR2   | 0.72 |
| hsa-mir-218 | CNTN3    | 0.65 |
| hsa-mir-218 | CNTN4    | 0.66 |
| hsa-mir-218 | CNTN6    | 0.61 |
| hsa-mir-218 | CPEB3    | 0.69 |
| hsa-mir-218 | CPLX1    | 0.68 |
| hsa-mir-218 | CPLX2    | 0.71 |
| hsa-mir-218 | CPNE6    | 0.66 |
| hsa-mir-218 | CREG2    | 0.68 |
| hsa-mir-218 | CRHBP    | 0.64 |
| hsa-mir-218 | CRTAC1   | 0.6  |
| hsa-mir-218 | CRYM     | 0.67 |
| hsa-mir-218 | CTXN3    | 0.68 |
| hsa-mir-218 | CYFIP2   | 0.56 |
| hsa-mir-218 | CYP4X1   | 0.73 |
| hsa-mir-218 | DACH2    | 0.66 |
| hsa-mir-218 | DLG2     | 0.7  |
| hsa-mir-218 | DLGAP2   | 0.78 |
| hsa-mir-218 | DNAJC6   | 0.69 |
| hsa-mir-218 | DNM1     | 0.73 |
| hsa-mir-218 | DOC2A    | 0.73 |
| hsa-mir-218 | DOCK9    | 0.52 |
| hsa-mir-218 | DRD1     | 0.69 |

|             |           |      |
|-------------|-----------|------|
| hsa-mir-218 | DRD1IP    | 0.76 |
| hsa-mir-218 | DUSP8     | 0.54 |
| hsa-mir-218 | DYNC111   | 0.61 |
| hsa-mir-218 | EDIL3     | 0.58 |
| hsa-mir-218 | EFCBP2    | 0.65 |
| hsa-mir-218 | EFHA2     | 0.65 |
| hsa-mir-218 | ENC1      | 0.56 |
| hsa-mir-218 | ENTPD3    | 0.57 |
| hsa-mir-218 | EPB49     | 0.66 |
| hsa-mir-218 | EPHB6     | 0.6  |
| hsa-mir-218 | ERC2      | 0.68 |
| hsa-mir-218 | FAM126B   | 0.57 |
| hsa-mir-218 | FAM19A1   | 0.63 |
| hsa-mir-218 | FAM19A2   | 0.73 |
| hsa-mir-218 | FAM81A    | 0.58 |
| hsa-mir-218 | FBXL16    | 0.6  |
| hsa-mir-218 | FBXO40    | 0.65 |
| hsa-mir-218 | FBXO41    | 0.64 |
| hsa-mir-218 | FBXW7     | 0.7  |
| hsa-mir-218 | FLJ33534  | 0.61 |
| hsa-mir-218 | FLJ37464  | 0.65 |
| hsa-mir-218 | FLRT2     | 0.49 |
| hsa-mir-218 | FRMPD4    | 0.74 |
| hsa-mir-218 | FSTL5     | 0.68 |
| hsa-mir-218 | FUT9      | 0.48 |
| hsa-mir-218 | GABARAPL3 | 0.64 |
| hsa-mir-218 | GABRA1    | 0.73 |
| hsa-mir-218 | GABRA2    | 0.62 |
| hsa-mir-218 | GABRA4    | 0.68 |
| hsa-mir-218 | GABRA5    | 0.71 |
| hsa-mir-218 | GABRG1    | 0.68 |
| hsa-mir-218 | GABRG2    | 0.7  |
| hsa-mir-218 | GAD2      | 0.64 |
| hsa-mir-218 | GALNT9    | 0.66 |
| hsa-mir-218 | GALNTL5   | 0.67 |
| hsa-mir-218 | GARNL3    | 0.6  |
| hsa-mir-218 | GAST      | 0.6  |
| hsa-mir-218 | GFRA2     | 0.48 |
| hsa-mir-218 | GJB6      | 0.66 |
| hsa-mir-218 | GLS       | 0.64 |
| hsa-mir-218 | GLS2      | 0.62 |
| hsa-mir-218 | GLT1D1    | 0.68 |
| hsa-mir-218 | GNAO1     | 0.65 |
| hsa-mir-218 | GNG3      | 0.69 |
| hsa-mir-218 | GOT1      | 0.65 |
| hsa-mir-218 | GPR26     | 0.71 |
| hsa-mir-218 | GPRASP1   | 0.53 |
| hsa-mir-218 | GRIN2B    | 0.59 |
| hsa-mir-218 | GRIN3A    | 0.76 |
| hsa-mir-218 | GRM1      | 0.69 |
| hsa-mir-218 | GRM3      | 0.55 |
| hsa-mir-218 | GRM5      | 0.65 |
| hsa-mir-218 | GRM7      | 0.75 |

|             |          |      |
|-------------|----------|------|
| hsa-mir-218 | GRP      | 0.47 |
| hsa-mir-218 | GUCA1B   | 0.53 |
| hsa-mir-218 | GUCA2B   | 0.57 |
| hsa-mir-218 | GUCY1B3  | 0.61 |
| hsa-mir-218 | HCN1     | 0.72 |
| hsa-mir-218 | HECW1    | 0.73 |
| hsa-mir-218 | HMGCLL1  | 0.63 |
| hsa-mir-218 | HNT      | 0.42 |
| hsa-mir-218 | HPCAL4   | 0.64 |
| hsa-mir-218 | HRNBP3   | 0.75 |
| hsa-mir-218 | HS3ST2   | 0.64 |
| hsa-mir-218 | HS3ST4   | 0.67 |
| hsa-mir-218 | HS6ST3   | 0.62 |
| hsa-mir-218 | HTR1E    | 0.55 |
| hsa-mir-218 | HTR2A    | 0.7  |
| hsa-mir-218 | HTR5A    | 0.71 |
| hsa-mir-218 | INPP5A   | 0.64 |
| hsa-mir-218 | ISLR2    | 0.65 |
| hsa-mir-218 | JAKMIP1  | 0.61 |
| hsa-mir-218 | JPH3     | 0.63 |
| hsa-mir-218 | KALRN    | 0.72 |
| hsa-mir-218 | KCNA1    | 0.61 |
| hsa-mir-218 | KCNA4    | 0.66 |
| hsa-mir-218 | KCNAB1   | 0.64 |
| hsa-mir-218 | KCNB2    | 0.69 |
| hsa-mir-218 | KCNC2    | 0.72 |
| hsa-mir-218 | KCNC3    | 0.57 |
| hsa-mir-218 | KCNH3    | 0.67 |
| hsa-mir-218 | KCNJ12   | 0.7  |
| hsa-mir-218 | KCNK1    | 0.62 |
| hsa-mir-218 | KCNN1    | 0.62 |
| hsa-mir-218 | KCNS1    | 0.64 |
| hsa-mir-218 | KCNV1    | 0.72 |
| hsa-mir-218 | KCTD16   | 0.71 |
| hsa-mir-218 | KCTD4    | 0.61 |
| hsa-mir-218 | KIAA0284 | 0.6  |
| hsa-mir-218 | KIAA0319 | 0.61 |
| hsa-mir-218 | KIAA0513 | 0.68 |
| hsa-mir-218 | KIAA0748 | 0.65 |
| hsa-mir-218 | KIAA0774 | 0.65 |
| hsa-mir-218 | KIAA1045 | 0.58 |
| hsa-mir-218 | KIAA1107 | 0.7  |
| hsa-mir-218 | KIAA1239 | 0.71 |
| hsa-mir-218 | KIAA1622 | 0.61 |
| hsa-mir-218 | KIAA1853 | 0.72 |
| hsa-mir-218 | KIAA1957 | 0.54 |
| hsa-mir-218 | KIF1A    | 0.57 |
| hsa-mir-218 | KIF5A    | 0.7  |
| hsa-mir-218 | KIF5C    | 0.55 |
| hsa-mir-218 | KLHL1    | 0.69 |
| hsa-mir-218 | KLHL32   | 0.54 |
| hsa-mir-218 | KLK7     | 0.67 |
| hsa-mir-218 | KNDC1    | 0.51 |



|             |           |      |
|-------------|-----------|------|
| hsa-mir-218 | KRT222P   | 0.71 |
| hsa-mir-218 | KSR2      | 0.64 |
| hsa-mir-218 | LHX6      | 0.65 |
| hsa-mir-218 | LINGO2    | 0.58 |
| hsa-mir-218 | LOC339524 | 0.65 |
| hsa-mir-218 | LOC399947 | 0.62 |
| hsa-mir-218 | LOC400120 | 0.73 |
| hsa-mir-218 | LOC554175 | 0.71 |
| hsa-mir-218 | LRFN2     | 0.68 |
| hsa-mir-218 | LRFN5     | 0.71 |
| hsa-mir-218 | LRP11     | 0.58 |
| hsa-mir-218 | LRRC7     | 0.7  |
| hsa-mir-218 | LRTM2     | 0.74 |
| hsa-mir-218 | LY6H      | 0.55 |
| hsa-mir-218 | MAGEE1    | 0.63 |
| hsa-mir-218 | MAL2      | 0.6  |
| hsa-mir-218 | MAP2K4    | 0.67 |
| hsa-mir-218 | MAP7D2    | 0.69 |
| hsa-mir-218 | MAPK8IP2  | 0.67 |
| hsa-mir-218 | MAPRE3    | 0.58 |
| hsa-mir-218 | MAST3     | 0.7  |
| hsa-mir-218 | MCHR2     | 0.7  |
| hsa-mir-218 | MFSD4     | 0.69 |
| hsa-mir-218 | MGC39606  | 0.62 |
| hsa-mir-218 | MICAL2    | 0.74 |
| hsa-mir-218 | MUM1L1    | 0.61 |
| hsa-mir-218 | MYT1L     | 0.77 |
| hsa-mir-218 | NAP1L2    | 0.58 |
| hsa-mir-218 | NAP1L3    | 0.64 |
| hsa-mir-218 | NAPB      | 0.74 |
| hsa-mir-218 | NAV3      | 0.52 |
| hsa-mir-218 | NBEA      | 0.5  |
| hsa-mir-218 | NCDN      | 0.68 |
| hsa-mir-218 | NEFH      | 0.62 |
| hsa-mir-218 | NEFL      | 0.59 |
| hsa-mir-218 | NEFM      | 0.66 |
| hsa-mir-218 | NEGR1     | 0.65 |
| hsa-mir-218 | NELL1     | 0.61 |
| hsa-mir-218 | NEURL     | 0.67 |
| hsa-mir-218 | NEUROD2   | 0.68 |
| hsa-mir-218 | NEUROD6   | 0.72 |
| hsa-mir-218 | NGEF      | 0.55 |
| hsa-mir-218 | NKAPL     | 0.37 |
| hsa-mir-218 | NMNAT2    | 0.62 |
| hsa-mir-218 | NNAT      | 0.39 |
| hsa-mir-218 | NPM2      | 0.68 |
| hsa-mir-218 | NPTXR     | 0.54 |
| hsa-mir-218 | NRG3      | 0.6  |
| hsa-mir-218 | NRGN      | 0.66 |
| hsa-mir-218 | NRSN1     | 0.68 |
| hsa-mir-218 | NRXN3     | 0.54 |
| hsa-mir-218 | NSF       | 0.73 |
| hsa-mir-218 | NY-REN-7  | 0.68 |

|             |           |      |
|-------------|-----------|------|
| hsa-mir-218 | OLFM3     | 0.73 |
| hsa-mir-218 | OPCML     | 0.57 |
| hsa-mir-218 | OPRK1     | 0.59 |
| hsa-mir-218 | OR2L13    | 0.62 |
| hsa-mir-218 | PACSIN1   | 0.7  |
| hsa-mir-218 | PAK3      | 0.64 |
| hsa-mir-218 | PCDHAC2   | 0.57 |
| hsa-mir-218 | PCLO      | 0.66 |
| hsa-mir-218 | PCSK2     | 0.66 |
| hsa-mir-218 | PDE1B     | 0.73 |
| hsa-mir-218 | PDYN      | 0.54 |
| hsa-mir-218 | PHYHIP    | 0.66 |
| hsa-mir-218 | PI4KA     | 0.62 |
| hsa-mir-218 | PIP3-E    | 0.72 |
| hsa-mir-218 | PLEKHA1   | 0.69 |
| hsa-mir-218 | PLK2      | 0.45 |
| hsa-mir-218 | PNCK      | 0.71 |
| hsa-mir-218 | PNMA5     | 0.66 |
| hsa-mir-218 | PNOC      | 0.45 |
| hsa-mir-218 | PPFIA2    | 0.55 |
| hsa-mir-218 | PPM2C     | 0.57 |
| hsa-mir-218 | PPP2R2C   | 0.61 |
| hsa-mir-218 | PRKCB1    | 0.57 |
| hsa-mir-218 | PRMT8     | 0.75 |
| hsa-mir-218 | PSD       | 0.73 |
| hsa-mir-218 | PSD3      | 0.62 |
| hsa-mir-218 | PTH2R     | 0.62 |
| hsa-mir-218 | PTPN5     | 0.56 |
| hsa-mir-218 | PTPRT     | 0.57 |
| hsa-mir-218 | QDPR      | 0.47 |
| hsa-mir-218 | RAB11FIP2 | 0.62 |
| hsa-mir-218 | RAB40B    | 0.64 |
| hsa-mir-218 | RALYL     | 0.55 |
| hsa-mir-218 | RAPGEF4   | 0.59 |
| hsa-mir-218 | REPS2     | 0.6  |
| hsa-mir-218 | RFPL1     | 0.7  |
| hsa-mir-218 | RFPL3     | 0.69 |
| hsa-mir-218 | RGS4      | 0.58 |
| hsa-mir-218 | RGS7      | 0.59 |
| hsa-mir-218 | RICH2     | 0.7  |
| hsa-mir-218 | RIMBP2    | 0.71 |
| hsa-mir-218 | RIMS1     | 0.65 |
| hsa-mir-218 | RIMS2     | 0.69 |
| hsa-mir-218 | RPRML     | 0.47 |
| hsa-mir-218 | RSPO2     | 0.6  |
| hsa-mir-218 | RSPO3     | 0.7  |
| hsa-mir-218 | RTN4      | 0.57 |
| hsa-mir-218 | RUFY2     | 0.57 |
| hsa-mir-218 | RUNDC3A   | 0.68 |
| hsa-mir-218 | RUNDC3B   | 0.52 |
| hsa-mir-218 | RYR2      | 0.73 |
| hsa-mir-218 | SCN2A     | 0.69 |
| hsa-mir-218 | SCN2B     | 0.65 |

|             |          |       |
|-------------|----------|-------|
| hsa-mir-218 | SCN3B    | 0.7   |
| hsa-mir-218 | SCN8A    | 0.59  |
| hsa-mir-218 | SEC14L5  | 0.59  |
| hsa-mir-218 | SERPINI1 | 0.62  |
| hsa-mir-218 | SGIP1    | 0.63  |
| hsa-mir-218 | SGPP2    | 0.63  |
| hsa-mir-218 | SGSM1    | 0.64  |
| hsa-mir-218 | SH3GL2   | 0.54  |
| hsa-mir-218 | SH3GL3   | 0.58  |
| hsa-mir-218 | SLC12A5  | 0.75  |
| hsa-mir-218 | SLC17A6  | 0.67  |
| hsa-mir-218 | SLC17A7  | 0.71  |
| hsa-mir-218 | SLC25A27 | 0.52  |
| hsa-mir-218 | SLC30A3  | 0.63  |
| hsa-mir-218 | SLC32A1  | 0.59  |
| hsa-mir-218 | SLC35F3  | 0.65  |
| hsa-mir-218 | SLC39A12 | 0.51  |
| hsa-mir-218 | SLC4A10  | 0.64  |
| hsa-mir-218 | SLC7A10  | 0.5   |
| hsa-mir-218 | SLITRK4  | 0.54  |
| hsa-mir-218 | SMPX     | 0.65  |
| hsa-mir-218 | SNAP25   | 0.59  |
| hsa-mir-218 | SNAP91   | 0.73  |
| hsa-mir-218 | SNCB     | 0.62  |
| hsa-mir-218 | SOHLH1   | 0.7   |
| hsa-mir-218 | SPOCK3   | 0.52  |
| hsa-mir-218 | SST      | 0.65  |
| hsa-mir-218 | SSTR1    | 0.59  |
| hsa-mir-218 | SSTR2    | 0.64  |
| hsa-mir-218 | STX1A    | 0.69  |
| hsa-mir-218 | STXBP1   | 0.72  |
| hsa-mir-218 | STXBP5   | 0.68  |
| hsa-mir-218 | STXBP5L  | 0.57  |
| hsa-mir-218 | STXBP6   | 0.56  |
| hsa-mir-218 | STYK1    | 0.69  |
| hsa-mir-218 | SULT4A1  | 0.69  |
| hsa-mir-218 | SV2B     | 0.65  |
| hsa-mir-218 | SV2C     | 0.6   |
| hsa-mir-218 | SYCE1    | 0.65  |
| hsa-mir-218 | SYN2     | 0.73  |
| hsa-mir-218 | SYNE1    | 0.57  |
| hsa-mir-218 | SYNPR    | 0.67  |
| hsa-mir-218 | SYP      | 0.74  |
| hsa-mir-218 | SYT1     | 0.74  |
| hsa-mir-218 | SYT13    | 0.66  |
| hsa-mir-218 | SYT4     | 0.61  |
| hsa-mir-218 | SYT5     | 0.69  |
| hsa-mir-218 | TAC1     | 0.49  |
| hsa-mir-218 | TBC1D9   | 0.53  |
| hsa-mir-218 | TBR1     | 0.65  |
| hsa-mir-218 | TCBA1    | 0.57  |
| hsa-mir-218 | TCERG1L  | 0.63  |
| hsa-mir-218 | THG1L    | -0.47 |

|             |          |       |
|-------------|----------|-------|
| hsa-mir-218 | TMEM10   | 0.67  |
| hsa-mir-218 | TMEM130  | 0.54  |
| hsa-mir-218 | TMEM155  | 0.73  |
| hsa-mir-218 | TMEM16C  | 0.69  |
| hsa-mir-218 | TNRC4    | 0.67  |
| hsa-mir-218 | TPPP     | 0.61  |
| hsa-mir-218 | TSPYL1   | 0.65  |
| hsa-mir-218 | TSPYL2   | 0.65  |
| hsa-mir-218 | TUBA8    | 0.74  |
| hsa-mir-218 | ULK2     | 0.48  |
| hsa-mir-218 | UNC13C   | 0.66  |
| hsa-mir-218 | UPP2     | 0.53  |
| hsa-mir-218 | VIP      | 0.72  |
| hsa-mir-218 | VSNL1    | 0.69  |
| hsa-mir-218 | VSTM2L   | 0.63  |
| hsa-mir-218 | WBSCR17  | 0.53  |
| hsa-mir-218 | WIF1     | 0.6   |
| hsa-mir-218 | WNT10B   | 0.62  |
| hsa-mir-218 | WSCD2    | 0.69  |
| hsa-mir-218 | YWHAH    | 0.67  |
| hsa-mir-218 | ZNF365   | 0.64  |
| hsa-mir-218 | ZNF540   | 0.58  |
| hsa-mir-219 | Sept4    | 0.53  |
| hsa-mir-219 | A2BP1    | 0.5   |
| hsa-mir-219 | AATK     | 0.71  |
| hsa-mir-219 | ABCA2    | 0.48  |
| hsa-mir-219 | ABCA9    | 0.04  |
| hsa-mir-219 | ABCC8    | 0.33  |
| hsa-mir-219 | ABHD12B  | 0.47  |
| hsa-mir-219 | ABHD6    | 0.51  |
| hsa-mir-219 | ACP6     | -0.28 |
| hsa-mir-219 | ADAMTS3  | -0.21 |
| hsa-mir-219 | ADARB2   | 0.65  |
| hsa-mir-219 | ADD3     | 0.34  |
| hsa-mir-219 | AGTPBP1  | 0.46  |
| hsa-mir-219 | AGXT2L1  | 0.41  |
| hsa-mir-219 | AIFM3    | 0.33  |
| hsa-mir-219 | AK5      | 0.65  |
| hsa-mir-219 | ALDOC    | 0.44  |
| hsa-mir-219 | AMOTL2   | 0.47  |
| hsa-mir-219 | AMZ1     | 0.45  |
| hsa-mir-219 | ANK3     | 0.47  |
| hsa-mir-219 | ANKRD38  | 0.39  |
| hsa-mir-219 | ANKRD43  | 0.42  |
| hsa-mir-219 | ANKS1B   | 0.56  |
| hsa-mir-219 | ANLN     | 0.44  |
| hsa-mir-219 | APLP1    | 0.45  |
| hsa-mir-219 | APOD     | 0.33  |
| hsa-mir-219 | ARHGAP22 | 0.38  |
| hsa-mir-219 | ARHGEF7  | 0.56  |
| hsa-mir-219 | ARSJ     | -0.47 |
| hsa-mir-219 | AS3MT    | 0.1   |
| hsa-mir-219 | ASPA     | 0.47  |

|             |           |       |
|-------------|-----------|-------|
| hsa-mir-219 | ASPHD1    | 0.37  |
| hsa-mir-219 | ASPN      | -0.34 |
| hsa-mir-219 | ASTN2     | 0.33  |
| hsa-mir-219 | ATCAY     | 0.48  |
| hsa-mir-219 | ATP10B    | 0.54  |
| hsa-mir-219 | ATRNL1    | 0.47  |
| hsa-mir-219 | B3GAT1    | 0.43  |
| hsa-mir-219 | B3GNT5    | -0.42 |
| hsa-mir-219 | BASP1     | 0.5   |
| hsa-mir-219 | BCAS1     | 0.76  |
| hsa-mir-219 | BCL11B    | 0.37  |
| hsa-mir-219 | BEST1     | 0.5   |
| hsa-mir-219 | BEX2      | 0.45  |
| hsa-mir-219 | BEX5      | 0.47  |
| hsa-mir-219 | BHLHB5    | 0.42  |
| hsa-mir-219 | BIN1      | 0.43  |
| hsa-mir-219 | BMP2      | 0.12  |
| hsa-mir-219 | BMPER     | 0.31  |
| hsa-mir-219 | BOK       | 0.55  |
| hsa-mir-219 | BRUNOL4   | 0.5   |
| hsa-mir-219 | BSN       | 0.5   |
| hsa-mir-219 | BTBD16    | 0.46  |
| hsa-mir-219 | BZRAP1    | 0.44  |
| hsa-mir-219 | C10orf109 | 0.52  |
| hsa-mir-219 | C10orf116 | 0.27  |
| hsa-mir-219 | C10orf90  | 0.4   |
| hsa-mir-219 | C11orf52  | 0.31  |
| hsa-mir-219 | C11orf9   | 0.75  |
| hsa-mir-219 | C12orf34  | 0.56  |
| hsa-mir-219 | C14orf128 | 0.52  |
| hsa-mir-219 | C14orf132 | 0.46  |
| hsa-mir-219 | C18orf56  | 0.24  |
| hsa-mir-219 | C1orf198  | 0.44  |
| hsa-mir-219 | C1orf87   | 0.2   |
| hsa-mir-219 | C1QTNF1   | -0.32 |
| hsa-mir-219 | C1QTNF4   | 0.52  |
| hsa-mir-219 | C20orf39  | 0.52  |
| hsa-mir-219 | C20orf42  | 0.37  |
| hsa-mir-219 | C20orf58  | 0.37  |
| hsa-mir-219 | C22orf9   | 0.44  |
| hsa-mir-219 | C2orf12   | -0.4  |
| hsa-mir-219 | C2orf40   | 0.25  |
| hsa-mir-219 | C6orf142  | 0.31  |
| hsa-mir-219 | C6orf159  | 0.44  |
| hsa-mir-219 | C7orf16   | 0.33  |
| hsa-mir-219 | C7orf41   | 0.68  |
| hsa-mir-219 | C9orf125  | 0.55  |
| hsa-mir-219 | C9orf164  | 0.69  |
| hsa-mir-219 | C9orf72   | 0.06  |
| hsa-mir-219 | CA10      | 0.49  |
| hsa-mir-219 | CA8       | 0.3   |
| hsa-mir-219 | CABP1     | 0.55  |
| hsa-mir-219 | CALN1     | 0.52  |

|             |          |       |
|-------------|----------|-------|
| hsa-mir-219 | CAMKV    | 0.56  |
| hsa-mir-219 | CAPN3    | 0.67  |
| hsa-mir-219 | CBFA2T3  | 0.45  |
| hsa-mir-219 | CBLN2    | 0.46  |
| hsa-mir-219 | CCDC85A  | 0.54  |
| hsa-mir-219 | CCK      | 0.46  |
| hsa-mir-219 | CCKBR    | 0.52  |
| hsa-mir-219 | CCNB3    | 0.24  |
| hsa-mir-219 | CDC42EP2 | 0.51  |
| hsa-mir-219 | CDCA4    | -0.33 |
| hsa-mir-219 | CDH13    | 0.42  |
| hsa-mir-219 | CDH18    | 0.57  |
| hsa-mir-219 | CDH19    | 0.41  |
| hsa-mir-219 | CDH22    | 0.51  |
| hsa-mir-219 | CDH8     | 0.51  |
| hsa-mir-219 | CDKN1C   | 0.56  |
| hsa-mir-219 | CDKN2A   | 0.05  |
| hsa-mir-219 | CDKN3    | -0.19 |
| hsa-mir-219 | CDR1     | 0.59  |
| hsa-mir-219 | CENTD3   | -0.43 |
| hsa-mir-219 | CGNL1    | -0.19 |
| hsa-mir-219 | CHRNA9   | -0.36 |
| hsa-mir-219 | CIB2     | -0.15 |
| hsa-mir-219 | CKMT1A   | 0.51  |
| hsa-mir-219 | CLCA4    | 0.64  |
| hsa-mir-219 | CLDN11   | 0.6   |
| hsa-mir-219 | CLDND1   | 0.51  |
| hsa-mir-219 | CLMN     | 0.31  |
| hsa-mir-219 | CLN8     | 0.42  |
| hsa-mir-219 | CLUL1    | 0.23  |
| hsa-mir-219 | CMTM5    | 0.47  |
| hsa-mir-219 | CNDP1    | 0.63  |
| hsa-mir-219 | CNP      | 0.66  |
| hsa-mir-219 | CNTN2    | 0.52  |
| hsa-mir-219 | CNTN3    | 0.46  |
| hsa-mir-219 | CNTNAP4  | 0.76  |
| hsa-mir-219 | COL9A3   | 0.03  |
| hsa-mir-219 | CP110    | 0.32  |
| hsa-mir-219 | CPEB3    | 0.54  |
| hsa-mir-219 | CPLX3    | 0.43  |
| hsa-mir-219 | CPXM2    | 0.25  |
| hsa-mir-219 | CREG2    | 0.46  |
| hsa-mir-219 | CRHBP    | 0.57  |
| hsa-mir-219 | CRLF1    | 0.21  |
| hsa-mir-219 | CRTAC1   | 0.5   |
| hsa-mir-219 | CRYGB    | 0.43  |
| hsa-mir-219 | CRYM     | 0.39  |
| hsa-mir-219 | CTNNA3   | 0.42  |
| hsa-mir-219 | CYP26B1  | 0.34  |
| hsa-mir-219 | CYP7B1   | 0.28  |
| hsa-mir-219 | DAAM2    | 0.45  |
| hsa-mir-219 | DACH2    | 0.59  |
| hsa-mir-219 | DACT1    | -0.01 |

|             |         |       |
|-------------|---------|-------|
| hsa-mir-219 | DACT2   | 0.33  |
| hsa-mir-219 | DACT3   | 0.52  |
| hsa-mir-219 | DAPK2   | 0.24  |
| hsa-mir-219 | DBC1    | 0.46  |
| hsa-mir-219 | DBNDD2  | 0.62  |
| hsa-mir-219 | DEPDC7  | 0.26  |
| hsa-mir-219 | DKK1    | -0.15 |
| hsa-mir-219 | DLEU7   | 0.46  |
| hsa-mir-219 | DLG2    | 0.5   |
| hsa-mir-219 | DMRT2   | 0.37  |
| hsa-mir-219 | DNAJC6  | 0.49  |
| hsa-mir-219 | DNM3    | 0.56  |
| hsa-mir-219 | DOCK10  | 0.15  |
| hsa-mir-219 | DPP4    | -0.4  |
| hsa-mir-219 | DPYSL4  | 0.31  |
| hsa-mir-219 | DSCAML1 | 0.56  |
| hsa-mir-219 | DUSP26  | 0.49  |
| hsa-mir-219 | DUSP4   | -0.36 |
| hsa-mir-219 | DYNC111 | 0.56  |
| hsa-mir-219 | EDG2    | 0.06  |
| hsa-mir-219 | EDG8    | 0.68  |
| hsa-mir-219 | EDIL3   | 0.5   |
| hsa-mir-219 | EFHD1   | 0.47  |
| hsa-mir-219 | ELMO1   | 0.47  |
| hsa-mir-219 | ELOVL7  | 0.43  |
| hsa-mir-219 | EMX2    | 0.04  |
| hsa-mir-219 | ENOX1   | 0.28  |
| hsa-mir-219 | ENPP2   | 0.55  |
| hsa-mir-219 | ENPP4   | 0.4   |
| hsa-mir-219 | ENPP5   | 0.26  |
| hsa-mir-219 | EPB41L1 | 0.47  |
| hsa-mir-219 | EPHA10  | 0.53  |
| hsa-mir-219 | ERBB3   | 0.56  |
| hsa-mir-219 | ERC2    | 0.55  |
| hsa-mir-219 | ETV5    | -0.22 |
| hsa-mir-219 | EVI2A   | 0.4   |
| hsa-mir-219 | EXTL1   | 0.57  |
| hsa-mir-219 | EYA2    | -0.26 |
| hsa-mir-219 | EYA4    | -0.26 |
| hsa-mir-219 | F5      | 0.32  |
| hsa-mir-219 | FA2H    | 0.8   |
| hsa-mir-219 | FABP7   | -0.16 |
| hsa-mir-219 | FAF1    | -0.12 |
| hsa-mir-219 | FAM107B | 0.56  |
| hsa-mir-219 | FAM133A | 0.46  |
| hsa-mir-219 | FAM19A4 | 0.59  |
| hsa-mir-219 | FAM38B  | 0.33  |
| hsa-mir-219 | FAM77C  | 0.52  |
| hsa-mir-219 | FBXL16  | 0.58  |
| hsa-mir-219 | FBXO2   | 0.6   |
| hsa-mir-219 | FCHO1   | 0.51  |
| hsa-mir-219 | FEZF2   | 0.45  |
| hsa-mir-219 | FGF13   | 0.52  |

|             |          |       |
|-------------|----------|-------|
| hsa-mir-219 | FGF9     | 0.48  |
| hsa-mir-219 | FGFR2    | 0.58  |
| hsa-mir-219 | FLJ20489 | 0.5   |
| hsa-mir-219 | FLJ21963 | -0.49 |
| hsa-mir-219 | FLJ33790 | 0.42  |
| hsa-mir-219 | FLJ37464 | 0.49  |
| hsa-mir-219 | FOLH1    | 0.52  |
| hsa-mir-219 | FUT9     | 0.48  |
| hsa-mir-219 | FZD7     | -0.45 |
| hsa-mir-219 | GABRA5   | 0.39  |
| hsa-mir-219 | GABRB1   | 0.31  |
| hsa-mir-219 | GABRB3   | 0.4   |
| hsa-mir-219 | GABRG1   | 0.48  |
| hsa-mir-219 | GAL3ST1  | 0.71  |
| hsa-mir-219 | GALNT13  | 0.48  |
| hsa-mir-219 | GALNT14  | 0.35  |
| hsa-mir-219 | GALNTL5  | 0.46  |
| hsa-mir-219 | GAS2     | 0.14  |
| hsa-mir-219 | GDF10    | 0.4   |
| hsa-mir-219 | GDF15    | -0.37 |
| hsa-mir-219 | GDPD2    | -0.15 |
| hsa-mir-219 | GJA12    | 0.69  |
| hsa-mir-219 | GJB1     | 0.69  |
| hsa-mir-219 | GJB2     | -0.17 |
| hsa-mir-219 | GLDN     | 0.33  |
| hsa-mir-219 | GLS2     | 0.44  |
| hsa-mir-219 | GLTP     | 0.32  |
| hsa-mir-219 | GNAI1    | 0.53  |
| hsa-mir-219 | GNAO1    | 0.46  |
| hsa-mir-219 | GNG11    | -0.31 |
| hsa-mir-219 | GNG8     | 0.45  |
| hsa-mir-219 | GPC5     | 0.32  |
| hsa-mir-219 | GPD1     | 0.41  |
| hsa-mir-219 | GPR62    | 0.65  |
| hsa-mir-219 | GPX3     | -0.07 |
| hsa-mir-219 | GREM1    | 0.54  |
| hsa-mir-219 | GRHL3    | 0.14  |
| hsa-mir-219 | GRIN3A   | 0.4   |
| hsa-mir-219 | GRM1     | 0.37  |
| hsa-mir-219 | GRM3     | 0.47  |
| hsa-mir-219 | GSC      | -0.29 |
| hsa-mir-219 | GSTO2    | 0.42  |
| hsa-mir-219 | GUCA2B   | 0.52  |
| hsa-mir-219 | HAPLN2   | 0.68  |
| hsa-mir-219 | HECTD1   | 0.15  |
| hsa-mir-219 | HHATL    | 0.68  |
| hsa-mir-219 | HHIP     | 0.41  |
| hsa-mir-219 | HIPK2    | 0.38  |
| hsa-mir-219 | HMGCLL1  | 0.4   |
| hsa-mir-219 | HOXA13   | 0.1   |
| hsa-mir-219 | HOXA4    | -0.06 |
| hsa-mir-219 | HOXA7    | -0.06 |
| hsa-mir-219 | HOXB3    | -0.39 |



|             |           |       |
|-------------|-----------|-------|
| hsa-mir-219 | HOXD1     | 0.63  |
| hsa-mir-219 | HPCAL4    | 0.49  |
| hsa-mir-219 | HRASLS    | 0.39  |
| hsa-mir-219 | HS3ST3A1  | -0.32 |
| hsa-mir-219 | HS3ST3B1  | -0.38 |
| hsa-mir-219 | HS3ST4    | 0.57  |
| hsa-mir-219 | HS3ST5    | 0.4   |
| hsa-mir-219 | HSPA12A   | 0.58  |
| hsa-mir-219 | HSPA2     | 0.36  |
| hsa-mir-219 | HSPB3     | 0.46  |
| hsa-mir-219 | IGSF21    | 0.44  |
| hsa-mir-219 | IHPK3     | 0.2   |
| hsa-mir-219 | IL13RA2   | -0.08 |
| hsa-mir-219 | IL1RAPL1  | 0.66  |
| hsa-mir-219 | INA       | 0.52  |
| hsa-mir-219 | INPP1     | 0.37  |
| hsa-mir-219 | INPP5F    | 0.44  |
| hsa-mir-219 | JAKMIP1   | 0.52  |
| hsa-mir-219 | JPH3      | 0.57  |
| hsa-mir-219 | KCNA5     | 0.4   |
| hsa-mir-219 | KCNC1     | 0.37  |
| hsa-mir-219 | KCNH8     | 0.51  |
| hsa-mir-219 | KCNJ12    | 0.45  |
| hsa-mir-219 | KCNJ3     | 0.49  |
| hsa-mir-219 | KCNK1     | 0.62  |
| hsa-mir-219 | KCNK10    | 0.24  |
| hsa-mir-219 | KCNK12    | 0.47  |
| hsa-mir-219 | KCNMB4    | 0.51  |
| hsa-mir-219 | KCNS3     | 0.37  |
| hsa-mir-219 | KCTD14    | -0.38 |
| hsa-mir-219 | KCTD4     | 0.51  |
| hsa-mir-219 | KCTD8     | 0.32  |
| hsa-mir-219 | KHDRBS2   | 0.47  |
| hsa-mir-219 | KIAA0427  | 0.49  |
| hsa-mir-219 | KIAA1086  | 0.46  |
| hsa-mir-219 | KIAA1107  | 0.52  |
| hsa-mir-219 | KIAA1189  | 0.68  |
| hsa-mir-219 | KIAA1244  | 0.52  |
| hsa-mir-219 | KIAA1324L | 0.4   |
| hsa-mir-219 | KIAA1394  | 0.73  |
| hsa-mir-219 | KIAA1576  | 0.34  |
| hsa-mir-219 | KIAA1598  | 0.63  |
| hsa-mir-219 | KIF1A     | 0.47  |
| hsa-mir-219 | KIF5A     | 0.44  |
| hsa-mir-219 | KIF6      | 0.53  |
| hsa-mir-219 | KIRREL3   | 0.42  |
| hsa-mir-219 | KLHL1     | 0.43  |
| hsa-mir-219 | KLHL32    | 0.61  |
| hsa-mir-219 | KLHL4     | -0.27 |
| hsa-mir-219 | KLK6      | 0.76  |
| hsa-mir-219 | KLRC2     | 0.35  |
| hsa-mir-219 | KLRC3     | 0.41  |
| hsa-mir-219 | KRT222P   | 0.52  |

|             |           |       |
|-------------|-----------|-------|
| hsa-mir-219 | KSR2      | 0.5   |
| hsa-mir-219 | LANCL1    | 0.54  |
| hsa-mir-219 | LARP6     | 0.48  |
| hsa-mir-219 | LDB3      | 0.68  |
| hsa-mir-219 | LDLR      | -0.36 |
| hsa-mir-219 | LECT1     | 0.01  |
| hsa-mir-219 | LGALS7    | -0.29 |
| hsa-mir-219 | LGI1      | 0.15  |
| hsa-mir-219 | LGI3      | 0.63  |
| hsa-mir-219 | LHFPL3    | 0.22  |
| hsa-mir-219 | LHPP      | 0.63  |
| hsa-mir-219 | LILRA4    | 0.29  |
| hsa-mir-219 | LINGO1    | 0.5   |
| hsa-mir-219 | LINGO2    | 0.39  |
| hsa-mir-219 | LIPE      | 0.65  |
| hsa-mir-219 | LOC493869 | -0.45 |
| hsa-mir-219 | LRFN2     | 0.55  |
| hsa-mir-219 | LRIG3     | -0.25 |
| hsa-mir-219 | LRP2      | 0.56  |
| hsa-mir-219 | LRRC39    | 0.32  |
| hsa-mir-219 | LRRC62    | 0.54  |
| hsa-mir-219 | LRRC8B    | 0.48  |
| hsa-mir-219 | LRRTM1    | 0.33  |
| hsa-mir-219 | LUZP2     | 0.34  |
| hsa-mir-219 | LY6H      | 0.44  |
| hsa-mir-219 | MAB21L1   | -0.32 |
| hsa-mir-219 | MAG       | 0.74  |
| hsa-mir-219 | MAGEE1    | 0.45  |
| hsa-mir-219 | MAGEH1    | 0.35  |
| hsa-mir-219 | MAGEL2    | 0.36  |
| hsa-mir-219 | MAL       | 0.7   |
| hsa-mir-219 | MAL2      | 0.37  |
| hsa-mir-219 | MAP6D1    | 0.5   |
| hsa-mir-219 | MAP7      | 0.5   |
| hsa-mir-219 | MBP       | 0.72  |
| hsa-mir-219 | MEOX2     | -0.33 |
| hsa-mir-219 | METTL7B   | -0.38 |
| hsa-mir-219 | MGAT4C    | 0.37  |
| hsa-mir-219 | MICAL3    | 0.36  |
| hsa-mir-219 | MMP14     | -0.47 |
| hsa-mir-219 | MOBP      | 0.76  |
| hsa-mir-219 | MOG       | 0.72  |
| hsa-mir-219 | MTTP      | -0.25 |
| hsa-mir-219 | MUM1L1    | 0.37  |
| hsa-mir-219 | MYLIP     | 0.26  |
| hsa-mir-219 | MYOT      | 0.49  |
| hsa-mir-219 | NAP1L2    | 0.52  |
| hsa-mir-219 | NAV3      | 0.42  |
| hsa-mir-219 | NDN       | 0.32  |
| hsa-mir-219 | NEFH      | 0.42  |
| hsa-mir-219 | NEFL      | 0.35  |
| hsa-mir-219 | NEFM      | 0.43  |
| hsa-mir-219 | NGEF      | 0.37  |

|             |         |       |
|-------------|---------|-------|
| hsa-mir-219 | NINJ2   | 0.55  |
| hsa-mir-219 | NIPA1   | 0.36  |
| hsa-mir-219 | NKX6-2  | 0.66  |
| hsa-mir-219 | NMNAT2  | 0.42  |
| hsa-mir-219 | NPM2    | 0.57  |
| hsa-mir-219 | NPPA    | 0.28  |
| hsa-mir-219 | NPTX1   | 0.32  |
| hsa-mir-219 | NPY     | 0.52  |
| hsa-mir-219 | NR0B1   | 0.45  |
| hsa-mir-219 | NT5M    | 0.18  |
| hsa-mir-219 | OLFM1   | 0.44  |
| hsa-mir-219 | OLFM3   | 0.37  |
| hsa-mir-219 | OMG     | 0.45  |
| hsa-mir-219 | OPCML   | 0.43  |
| hsa-mir-219 | OR2L13  | 0.59  |
| hsa-mir-219 | OR7A5   | 0.4   |
| hsa-mir-219 | P2RX7   | 0.45  |
| hsa-mir-219 | PACSN1  | 0.51  |
| hsa-mir-219 | PAIP2B  | 0.69  |
| hsa-mir-219 | PAK3    | 0.45  |
| hsa-mir-219 | PAK7    | 0.54  |
| hsa-mir-219 | PAQR6   | 0.5   |
| hsa-mir-219 | PAQR8   | 0.4   |
| hsa-mir-219 | PCDH11Y | 0.52  |
| hsa-mir-219 | PCDH20  | 0.24  |
| hsa-mir-219 | PCDH7   | 0.37  |
| hsa-mir-219 | PCP4    | 0.31  |
| hsa-mir-219 | PCSK6   | 0.66  |
| hsa-mir-219 | PDE1C   | 0.09  |
| hsa-mir-219 | PDE2A   | 0.58  |
| hsa-mir-219 | PDGFD   | -0.37 |
| hsa-mir-219 | PDIA2   | 0.61  |
| hsa-mir-219 | PDK4    | 0.41  |
| hsa-mir-219 | PEX5L   | 0.65  |
| hsa-mir-219 | PFN2    | 0.39  |
| hsa-mir-219 | PHACTR3 | 0.55  |
| hsa-mir-219 | PIK3C2B | 0.33  |
| hsa-mir-219 | PIM3    | 0.17  |
| hsa-mir-219 | PIP4K2A | 0.57  |
| hsa-mir-219 | PITX2   | -0.07 |
| hsa-mir-219 | PKD2L1  | 0.33  |
| hsa-mir-219 | PKIB    | -0.35 |
| hsa-mir-219 | PLA2G7  | 0.38  |
| hsa-mir-219 | PLAC8   | 0.03  |
| hsa-mir-219 | PLCL1   | 0.6   |
| hsa-mir-219 | PLCXD3  | 0.41  |
| hsa-mir-219 | PLEKHB1 | 0.48  |
| hsa-mir-219 | PLEKHG3 | 0.49  |
| hsa-mir-219 | PLEKHH1 | 0.59  |
| hsa-mir-219 | PLLP    | 0.52  |
| hsa-mir-219 | PLP1    | 0.73  |
| hsa-mir-219 | POPDC3  | 0.34  |
| hsa-mir-219 | POSTN   | -0.45 |

|             |              |       |
|-------------|--------------|-------|
| hsa-mir-219 | PPAPDC1A     | 0.37  |
| hsa-mir-219 | PPFIA2       | 0.37  |
| hsa-mir-219 | PPIC         | -0.51 |
| hsa-mir-219 | PPM1H        | 0.54  |
| hsa-mir-219 | PPP1R14A     | 0.57  |
| hsa-mir-219 | PPP1R16B     | 0.68  |
| hsa-mir-219 | PPP1R1A      | 0.4   |
| hsa-mir-219 | PPP2R2C      | 0.58  |
| hsa-mir-219 | PRDM12       | 0.36  |
| hsa-mir-219 | PRIMA1       | 0.32  |
| hsa-mir-219 | PRKCB1       | 0.45  |
| hsa-mir-219 | PRKCE        | 0.54  |
| hsa-mir-219 | PRKCQ        | 0.43  |
| hsa-mir-219 | PSCD1        | 0.48  |
| hsa-mir-219 | PSMAL        | 0.49  |
| hsa-mir-219 | PTGDS        | 0.41  |
| hsa-mir-219 | PTPRD        | 0.31  |
| hsa-mir-219 | QDPR         | 0.61  |
| hsa-mir-219 | RAB11FIP4    | 0.59  |
| hsa-mir-219 | RAB33A       | 0.63  |
| hsa-mir-219 | RAB3C        | 0.45  |
| hsa-mir-219 | RAB40B       | 0.63  |
| hsa-mir-219 | RAPGEF5      | 0.6   |
| hsa-mir-219 | RASEF        | -0.39 |
| hsa-mir-219 | RASGEF1C     | 0.6   |
| hsa-mir-219 | RASGRF1      | 0.5   |
| hsa-mir-219 | RASGRF2      | 0.5   |
| hsa-mir-219 | RASL11B      | 0.39  |
| hsa-mir-219 | RBM11        | 0.57  |
| hsa-mir-219 | RBP7         | 0.42  |
| hsa-mir-219 | RDH5         | -0.29 |
| hsa-mir-219 | REPS2        | 0.57  |
| hsa-mir-219 | RHBDL2       | 0.35  |
| hsa-mir-219 | RICH2        | 0.54  |
| hsa-mir-219 | RIMS3        | 0.58  |
| hsa-mir-219 | RNF150       | 0.45  |
| hsa-mir-219 | RNF182       | 0.25  |
| hsa-mir-219 | RP11-35N6.1  | 0.54  |
| hsa-mir-219 | RP13-102H20. | 0.24  |
| hsa-mir-219 | RPRML        | 0.36  |
| hsa-mir-219 | RPS4Y1       | -0.01 |
| hsa-mir-219 | RPS6KA5      | 0.49  |
| hsa-mir-219 | RTP1         | 0.44  |
| hsa-mir-219 | RYR2         | 0.48  |
| hsa-mir-219 | S100A1       | 0.6   |
| hsa-mir-219 | SEC14L5      | 0.74  |
| hsa-mir-219 | SEMA3D       | 0.46  |
| hsa-mir-219 | SEMA4D       | 0.45  |
| hsa-mir-219 | SERPINI1     | 0.45  |
| hsa-mir-219 | SFTPC        | 0.7   |
| hsa-mir-219 | SGK2         | 0.49  |
| hsa-mir-219 | SGK3         | 0.43  |
| hsa-mir-219 | SGMS1        | 0.4   |

|             |            |       |
|-------------|------------|-------|
| hsa-mir-219 | SH3GL2     | 0.55  |
| hsa-mir-219 | SH3GL3     | 0.72  |
| hsa-mir-219 | SH3TC2     | 0.55  |
| hsa-mir-219 | SHANK2     | 0.55  |
| hsa-mir-219 | SKIP       | 0.44  |
| hsa-mir-219 | SLAIN1     | 0.49  |
| hsa-mir-219 | SLC10A4    | -0.28 |
| hsa-mir-219 | SLC16A14   | 0.36  |
| hsa-mir-219 | SLC25A27   | 0.45  |
| hsa-mir-219 | SLC26A9    | 0.43  |
| hsa-mir-219 | SLC30A3    | 0.44  |
| hsa-mir-219 | SLC31A2    | 0.42  |
| hsa-mir-219 | SLC35D1    | -0.53 |
| hsa-mir-219 | SLC35F3    | 0.65  |
| hsa-mir-219 | SLC38A1    | 0.3   |
| hsa-mir-219 | SLC45A3    | 0.65  |
| hsa-mir-219 | SLC5A11    | 0.74  |
| hsa-mir-219 | SLC7A14    | 0.68  |
| hsa-mir-219 | SLC8A3     | 0.55  |
| hsa-mir-219 | SLCO1A2    | 0.45  |
| hsa-mir-219 | SLCO3A1    | 0.39  |
| hsa-mir-219 | SLITRK1    | 0.54  |
| hsa-mir-219 | SLITRK4    | 0.54  |
| hsa-mir-219 | SLITRK5    | 0.35  |
| hsa-mir-219 | SLPI       | -0.11 |
| hsa-mir-219 | SNAP25     | 0.42  |
| hsa-mir-219 | SNCA       | 0.52  |
| hsa-mir-219 | SNIP       | 0.71  |
| hsa-mir-219 | SOCS2      | -0.38 |
| hsa-mir-219 | SORCS2     | 0.2   |
| hsa-mir-219 | SOX10      | 0.6   |
| hsa-mir-219 | SPOCK1     | 0.43  |
| hsa-mir-219 | SPOCK3     | 0.74  |
| hsa-mir-219 | SPON1      | 0.08  |
| hsa-mir-219 | SST        | 0.41  |
| hsa-mir-219 | SSTR1      | 0.52  |
| hsa-mir-219 | ST18       | 0.56  |
| hsa-mir-219 | ST6GAL1    | 0.39  |
| hsa-mir-219 | ST6GALNAC1 | 0.43  |
| hsa-mir-219 | ST6GALNAC3 | 0.45  |
| hsa-mir-219 | ST6GALNAC5 | 0.1   |
| hsa-mir-219 | ST8SIA3    | 0.43  |
| hsa-mir-219 | STEAP1     | -0.37 |
| hsa-mir-219 | STK17A     | -0.46 |
| hsa-mir-219 | STXBP1     | 0.48  |
| hsa-mir-219 | STXBP5L    | 0.4   |
| hsa-mir-219 | STXBP6     | 0.55  |
| hsa-mir-219 | SUSD5      | 0.37  |
| hsa-mir-219 | SV2C       | 0.46  |
| hsa-mir-219 | SVIP       | 0.33  |
| hsa-mir-219 | SYN3       | 0.5   |
| hsa-mir-219 | SYT13      | 0.52  |
| hsa-mir-219 | SYT4       | 0.43  |

|             |          |       |
|-------------|----------|-------|
| hsa-mir-219 | SYT6     | 0.41  |
| hsa-mir-219 | TAC3     | 0.32  |
| hsa-mir-219 | TBC1D12  | 0.43  |
| hsa-mir-219 | TCBA1    | 0.71  |
| hsa-mir-219 | TCEAL2   | 0.43  |
| hsa-mir-219 | TDH      | 0.22  |
| hsa-mir-219 | TDRD9    | 0.39  |
| hsa-mir-219 | TEAD2    | -0.39 |
| hsa-mir-219 | TF       | 0.75  |
| hsa-mir-219 | TFRC     | -0.21 |
| hsa-mir-219 | TGFA     | 0.27  |
| hsa-mir-219 | THBS4    | -0.12 |
| hsa-mir-219 | TLL2     | 0.54  |
| hsa-mir-219 | TM7SF4   | 0.08  |
| hsa-mir-219 | TMCC2    | 0.68  |
| hsa-mir-219 | TMCO3    | -0.3  |
| hsa-mir-219 | TMEFF1   | 0.48  |
| hsa-mir-219 | TMEFF2   | 0.64  |
| hsa-mir-219 | TMEM10   | 0.63  |
| hsa-mir-219 | TMEM106C | -0.18 |
| hsa-mir-219 | TMEM125  | 0.77  |
| hsa-mir-219 | TMEM130  | 0.43  |
| hsa-mir-219 | TMEM132B | 0.39  |
| hsa-mir-219 | TMEM139  | 0.48  |
| hsa-mir-219 | TMEM144  | 0.58  |
| hsa-mir-219 | TMEM151  | 0.58  |
| hsa-mir-219 | TMEM154  | -0.41 |
| hsa-mir-219 | TMEM16C  | 0.57  |
| hsa-mir-219 | TMEM16D  | 0.52  |
| hsa-mir-219 | TMEM28   | 0.42  |
| hsa-mir-219 | TMEM67   | -0.39 |
| hsa-mir-219 | TMEM71   | -0.4  |
| hsa-mir-219 | TMEM74   | 0.14  |
| hsa-mir-219 | TMEM98   | 0.25  |
| hsa-mir-219 | TP53INP2 | 0.38  |
| hsa-mir-219 | TPPP     | 0.61  |
| hsa-mir-219 | TRIM63   | 0.19  |
| hsa-mir-219 | TSPAN8   | 0.43  |
| hsa-mir-219 | TTC29    | 0.01  |
| hsa-mir-219 | TULP3    | -0.32 |
| hsa-mir-219 | UGT8     | 0.7   |
| hsa-mir-219 | ULK2     | 0.45  |
| hsa-mir-219 | USH1C    | 0.42  |
| hsa-mir-219 | USP43    | 0.52  |
| hsa-mir-219 | VAV3     | -0.4  |
| hsa-mir-219 | VIPR2    | 0.36  |
| hsa-mir-219 | VSNL1    | 0.34  |
| hsa-mir-219 | VWC2     | 0.26  |
| hsa-mir-219 | WASF1    | 0.52  |
| hsa-mir-219 | WEE1     | -0.51 |
| hsa-mir-219 | WSCD2    | 0.41  |
| hsa-mir-219 | YPEL4    | 0.56  |
| hsa-mir-219 | ZDHHC11  | 0.44  |

|             |          |       |
|-------------|----------|-------|
| hsa-mir-219 | ZEB2     | 0.48  |
| hsa-mir-219 | ZNF217   | -0.47 |
| hsa-mir-219 | ZNF469   | 0.34  |
| hsa-mir-219 | ZNF488   | 0.62  |
| hsa-mir-219 | ZNF536   | 0.54  |
| hsa-mir-219 | ZNF659   | -0.26 |
| hsa-mir-22  | ACCN2    | -0.43 |
| hsa-mir-22  | ACP5     | 0.41  |
| hsa-mir-22  | ACSL1    | 0.44  |
| hsa-mir-22  | ACSL5    | 0.37  |
| hsa-mir-22  | ACTN1    | 0.39  |
| hsa-mir-22  | ACVR2B   | -0.51 |
| hsa-mir-22  | AIM1     | 0.47  |
| hsa-mir-22  | AKR1B10  | 0.37  |
| hsa-mir-22  | ALOX5    | 0.52  |
| hsa-mir-22  | ALPK1    | 0.48  |
| hsa-mir-22  | AMACR    | 0.41  |
| hsa-mir-22  | AMPD3    | 0.56  |
| hsa-mir-22  | ANXA13   | 0.46  |
| hsa-mir-22  | ANXA4    | 0.6   |
| hsa-mir-22  | APOL1    | 0.38  |
| hsa-mir-22  | APOL3    | 0.45  |
| hsa-mir-22  | AQP9     | 0.51  |
| hsa-mir-22  | ARPC1B   | 0.47  |
| hsa-mir-22  | ASAH1    | 0.33  |
| hsa-mir-22  | ASL      | 0.36  |
| hsa-mir-22  | B3GNT2   | 0.4   |
| hsa-mir-22  | B4GALNT4 | -0.39 |
| hsa-mir-22  | BAG3     | 0.38  |
| hsa-mir-22  | BAI1     | -0.39 |
| hsa-mir-22  | BATF     | 0.48  |
| hsa-mir-22  | BIRC3    | 0.49  |
| hsa-mir-22  | BRI3     | 0.45  |
| hsa-mir-22  | BTBD11   | 0.43  |
| hsa-mir-22  | C1orf213 | -0.17 |
| hsa-mir-22  | C1orf34  | 0.5   |
| hsa-mir-22  | C1orf38  | 0.48  |
| hsa-mir-22  | C1S      | 0.51  |
| hsa-mir-22  | C2       | 0.45  |
| hsa-mir-22  | C21orf81 | -0.28 |
| hsa-mir-22  | C3       | 0.34  |
| hsa-mir-22  | C5orf32  | 0.55  |
| hsa-mir-22  | C9orf140 | -0.45 |
| hsa-mir-22  | C9orf95  | 0.51  |
| hsa-mir-22  | CACNA2D4 | 0.49  |
| hsa-mir-22  | CAMP     | 0.42  |
| hsa-mir-22  | CARD6    | 0.48  |
| hsa-mir-22  | CAST     | 0.56  |
| hsa-mir-22  | CCL2     | 0.47  |
| hsa-mir-22  | CCL26    | 0.45  |
| hsa-mir-22  | CD14     | 0.43  |
| hsa-mir-22  | CD59     | 0.51  |
| hsa-mir-22  | CD68     | 0.42  |

|            |          |       |
|------------|----------|-------|
| hsa-mir-22 | CDH10    | -0.3  |
| hsa-mir-22 | CEBPB    | 0.51  |
| hsa-mir-22 | CEBPE    | 0.48  |
| hsa-mir-22 | CFD      | 0.44  |
| hsa-mir-22 | CHIT1    | 0.4   |
| hsa-mir-22 | CLDN23   | 0.55  |
| hsa-mir-22 | CLEC2B   | 0.46  |
| hsa-mir-22 | CLIC2    | 0.4   |
| hsa-mir-22 | COL1A1   | 0.41  |
| hsa-mir-22 | COL9A3   | -0.21 |
| hsa-mir-22 | COPZ2    | 0.58  |
| hsa-mir-22 | CP       | 0.45  |
| hsa-mir-22 | CPVL     | 0.42  |
| hsa-mir-22 | CREBL2   | 0.5   |
| hsa-mir-22 | CRIP3    | -0.38 |
| hsa-mir-22 | CTSA     | 0.45  |
| hsa-mir-22 | CTSB     | 0.51  |
| hsa-mir-22 | CTSD     | 0.44  |
| hsa-mir-22 | CTSL1    | 0.45  |
| hsa-mir-22 | CXCL12   | 0.37  |
| hsa-mir-22 | CXXC4    | -0.36 |
| hsa-mir-22 | CYP1B1   | 0.46  |
| hsa-mir-22 | DIRAS3   | 0.42  |
| hsa-mir-22 | DSCAM    | -0.43 |
| hsa-mir-22 | DUSP23   | 0.4   |
| hsa-mir-22 | DYNLT3   | 0.51  |
| hsa-mir-22 | ECM1     | 0.42  |
| hsa-mir-22 | EDG2     | 0.21  |
| hsa-mir-22 | ELL2     | 0.36  |
| hsa-mir-22 | F13A1    | 0.49  |
| hsa-mir-22 | FAH      | 0.57  |
| hsa-mir-22 | FAM20A   | 0.45  |
| hsa-mir-22 | FAM26B   | 0.52  |
| hsa-mir-22 | FAP      | 0.46  |
| hsa-mir-22 | FAS      | 0.48  |
| hsa-mir-22 | FCGR2B   | 0.49  |
| hsa-mir-22 | FER1L3   | 0.51  |
| hsa-mir-22 | FGFBP3   | -0.49 |
| hsa-mir-22 | FLJ20273 | 0.49  |
| hsa-mir-22 | FLJ22662 | 0.51  |
| hsa-mir-22 | FTHL17   | 0.4   |
| hsa-mir-22 | FTHP1    | 0.46  |
| hsa-mir-22 | FTL      | 0.47  |
| hsa-mir-22 | FUCA1    | 0.46  |
| hsa-mir-22 | FXD5     | 0.42  |
| hsa-mir-22 | G0S2     | 0.36  |
| hsa-mir-22 | GATM     | 0.03  |
| hsa-mir-22 | GCLM     | 0.46  |
| hsa-mir-22 | GCNT1    | 0.55  |
| hsa-mir-22 | GJB2     | 0.43  |
| hsa-mir-22 | GLRX     | 0.44  |
| hsa-mir-22 | GLT8D4   | 0.5   |
| hsa-mir-22 | GNG4     | -0.56 |



|            |           |       |
|------------|-----------|-------|
| hsa-mir-22 | GPNMB     | 0.45  |
| hsa-mir-22 | GSN       | 0.44  |
| hsa-mir-22 | H2AFJ     | 0.44  |
| hsa-mir-22 | HEBP1     | 0.5   |
| hsa-mir-22 | HES6      | -0.45 |
| hsa-mir-22 | HFM1      | -0.45 |
| hsa-mir-22 | HIST1H4C  | -0.41 |
| hsa-mir-22 | HKDC1     | 0.35  |
| hsa-mir-22 | HMOX1     | 0.36  |
| hsa-mir-22 | HRASLS3   | 0.42  |
| hsa-mir-22 | HRH1      | 0.35  |
| hsa-mir-22 | ICAM1     | 0.52  |
| hsa-mir-22 | IFITM2    | 0.4   |
| hsa-mir-22 | IGFBP6    | 0.49  |
| hsa-mir-22 | IL13RA1   | 0.56  |
| hsa-mir-22 | IL1R1     | 0.55  |
| hsa-mir-22 | IL4R      | 0.43  |
| hsa-mir-22 | IL6       | 0.4   |
| hsa-mir-22 | IL7R      | 0.46  |
| hsa-mir-22 | ITGBL1    | 0.45  |
| hsa-mir-22 | KDEL3     | 0.45  |
| hsa-mir-22 | KLF12     | -0.49 |
| hsa-mir-22 | KLHL25    | -0.38 |
| hsa-mir-22 | LAMP2     | 0.48  |
| hsa-mir-22 | LAYN      | 0.42  |
| hsa-mir-22 | LGALS3    | 0.4   |
| hsa-mir-22 | LGALS8    | 0.47  |
| hsa-mir-22 | LOC221091 | 0.39  |
| hsa-mir-22 | LOX       | 0.49  |
| hsa-mir-22 | LPXN      | 0.43  |
| hsa-mir-22 | LRRN1     | -0.43 |
| hsa-mir-22 | LTB       | 0.37  |
| hsa-mir-22 | LY75      | 0.49  |
| hsa-mir-22 | LY96      | 0.53  |
| hsa-mir-22 | LYZ       | 0.37  |
| hsa-mir-22 | MAFB      | 0.47  |
| hsa-mir-22 | MAN1A1    | 0.45  |
| hsa-mir-22 | MANBA     | 0.47  |
| hsa-mir-22 | MAP3K8    | 0.46  |
| hsa-mir-22 | MCFD2     | 0.56  |
| hsa-mir-22 | MCM3APAS  | -0.46 |
| hsa-mir-22 | MFSD1     | 0.45  |
| hsa-mir-22 | MGC14376  | 0.55  |
| hsa-mir-22 | MGC21881  | -0.43 |
| hsa-mir-22 | MGC7036   | 0.52  |
| hsa-mir-22 | MVP       | 0.5   |
| hsa-mir-22 | MYBPH     | 0.37  |
| hsa-mir-22 | MYCN      | -0.59 |
| hsa-mir-22 | MYEF2     | -0.36 |
| hsa-mir-22 | MYL9      | 0.52  |
| hsa-mir-22 | MYLK      | 0.45  |
| hsa-mir-22 | NCF2      | 0.5   |
| hsa-mir-22 | NEU4      | -0.41 |

|            |          |       |
|------------|----------|-------|
| hsa-mir-22 | NLGN3    | -0.39 |
| hsa-mir-22 | NNMT     | 0.47  |
| hsa-mir-22 | NQO1     | 0.52  |
| hsa-mir-22 | NTRK1    | 0.35  |
| hsa-mir-22 | OBFC2A   | 0.46  |
| hsa-mir-22 | OLIG1    | -0.36 |
| hsa-mir-22 | OLIG2    | -0.35 |
| hsa-mir-22 | OSTF1    | 0.55  |
| hsa-mir-22 | P4HA2    | 0.61  |
| hsa-mir-22 | P4HA3    | 0.53  |
| hsa-mir-22 | PBEF1    | 0.39  |
| hsa-mir-22 | PCMTD2   | -0.37 |
| hsa-mir-22 | PDK3     | 0.47  |
| hsa-mir-22 | PGCP     | 0.49  |
| hsa-mir-22 | PHF21B   | -0.46 |
| hsa-mir-22 | PLAUR    | 0.46  |
| hsa-mir-22 | PLB1     | 0.48  |
| hsa-mir-22 | PPAP2A   | 0.34  |
| hsa-mir-22 | PRKCDBP  | 0.31  |
| hsa-mir-22 | PRPS2    | 0.29  |
| hsa-mir-22 | PRSS23   | 0.45  |
| hsa-mir-22 | PTCHD2   | -0.37 |
| hsa-mir-22 | PTPLAD2  | 0.43  |
| hsa-mir-22 | PUNC     | -0.44 |
| hsa-mir-22 | RCAN2    | 0.4   |
| hsa-mir-22 | RNF144B  | 0.5   |
| hsa-mir-22 | RNF149   | 0.47  |
| hsa-mir-22 | RUNX2    | 0.49  |
| hsa-mir-22 | S100A11  | 0.53  |
| hsa-mir-22 | S100A4   | 0.43  |
| hsa-mir-22 | S100A8   | 0.46  |
| hsa-mir-22 | S100A9   | 0.43  |
| hsa-mir-22 | SAA1     | 0.45  |
| hsa-mir-22 | SAT1     | 0.5   |
| hsa-mir-22 | SCPEP1   | 0.54  |
| hsa-mir-22 | SERPINE1 | 0.48  |
| hsa-mir-22 | SERPINF1 | 0.47  |
| hsa-mir-22 | SH2D2A   | 0.33  |
| hsa-mir-22 | SLC24A5  | -0.54 |
| hsa-mir-22 | SLC25A40 | 0.23  |
| hsa-mir-22 | SLC39A11 | 0.36  |
| hsa-mir-22 | SLC39A8  | 0.49  |
| hsa-mir-22 | SLC7A8   | 0.47  |
| hsa-mir-22 | SLFN5    | 0.43  |
| hsa-mir-22 | SLIT3    | 0.35  |
| hsa-mir-22 | SLN      | 0.31  |
| hsa-mir-22 | SMPD1    | 0.4   |
| hsa-mir-22 | SOD3     | 0.37  |
| hsa-mir-22 | SP140    | 0.45  |
| hsa-mir-22 | SPINK1   | 0.41  |
| hsa-mir-22 | SQRDL    | 0.53  |
| hsa-mir-22 | SQSTM1   | 0.49  |
| hsa-mir-22 | SRGN     | 0.42  |

|             |           |       |
|-------------|-----------|-------|
| hsa-mir-22  | SRPX2     | 0.46  |
| hsa-mir-22  | SSR3      | 0.5   |
| hsa-mir-22  | STAT6     | 0.39  |
| hsa-mir-22  | STBD1     | 0.42  |
| hsa-mir-22  | STOM      | 0.48  |
| hsa-mir-22  | STX3      | 0.5   |
| hsa-mir-22  | SUMF1     | 0.49  |
| hsa-mir-22  | SVIL      | 0.36  |
| hsa-mir-22  | TCIRG1    | 0.47  |
| hsa-mir-22  | TCN1      | 0.36  |
| hsa-mir-22  | TIMP1     | 0.45  |
| hsa-mir-22  | TMEM121   | -0.45 |
| hsa-mir-22  | TMEM145   | -0.51 |
| hsa-mir-22  | TMEM37    | 0.43  |
| hsa-mir-22  | TMSB10    | 0.46  |
| hsa-mir-22  | TNFAIP8   | 0.43  |
| hsa-mir-22  | TNFAIP8L3 | 0.46  |
| hsa-mir-22  | TNFSF4    | 0.51  |
| hsa-mir-22  | TRIM38    | 0.45  |
| hsa-mir-22  | TRPV2     | 0.44  |
| hsa-mir-22  | UAP1      | 0.36  |
| hsa-mir-22  | UPP1      | 0.53  |
| hsa-mir-22  | VDR       | 0.52  |
| hsa-mir-22  | WIPF1     | 0.45  |
| hsa-mir-22  | WISP1     | 0.38  |
| hsa-mir-22  | ZNF629    | -0.28 |
| hsa-mir-22  | ZNF704    | -0.44 |
| hsa-mir-22  | ZNRF2     | 0.36  |
| hsa-mir-221 | ADAM12    | 0.33  |
| hsa-mir-221 | AHNAK2    | 0.41  |
| hsa-mir-221 | ALS2CR13  | -0.5  |
| hsa-mir-221 | ANKRD13B  | -0.49 |
| hsa-mir-221 | ANXA1     | 0.36  |
| hsa-mir-221 | APLP2     | 0.49  |
| hsa-mir-221 | AQP1      | -0.23 |
| hsa-mir-221 | ARL9      | 0.36  |
| hsa-mir-221 | ARSJ      | 0.54  |
| hsa-mir-221 | ASXL3     | -0.42 |
| hsa-mir-221 | ATP1A3    | 0.41  |
| hsa-mir-221 | ATP6AP2   | 0.32  |
| hsa-mir-221 | BCAN      | -0.45 |
| hsa-mir-221 | BDNF      | 0.42  |
| hsa-mir-221 | BIRC3     | 0.37  |
| hsa-mir-221 | BRWD3     | -0.32 |
| hsa-mir-221 | C14orf50  | 0.06  |
| hsa-mir-221 | C1orf106  | -0.51 |
| hsa-mir-221 | C1QL1     | -0.37 |
| hsa-mir-221 | C20orf42  | -0.44 |
| hsa-mir-221 | C21orf63  | 0.33  |
| hsa-mir-221 | CAMKV     | -0.24 |
| hsa-mir-221 | CAPN2     | 0.32  |
| hsa-mir-221 | CCDC28B   | -0.46 |
| hsa-mir-221 | CCDC8     | 0.19  |

|             |         |       |
|-------------|---------|-------|
| hsa-mir-221 | CD274   | 0.39  |
| hsa-mir-221 | CD59    | 0.45  |
| hsa-mir-221 | CDH4    | 0.23  |
| hsa-mir-221 | CFI     | 0.37  |
| hsa-mir-221 | CHL1    | 0.25  |
| hsa-mir-221 | CHRNA9  | 0.37  |
| hsa-mir-221 | CHST2   | 0.53  |
| hsa-mir-221 | CHST7   | 0.41  |
| hsa-mir-221 | CHST9   | -0.41 |
| hsa-mir-221 | CLDN1   | 0.35  |
| hsa-mir-221 | CLGN    | -0.31 |
| hsa-mir-221 | CMYA5   | 0.35  |
| hsa-mir-221 | CNIH3   | 0.56  |
| hsa-mir-221 | CNTNAP3 | 0.46  |
| hsa-mir-221 | COL13A1 | 0.37  |
| hsa-mir-221 | CPNE4   | 0.39  |
| hsa-mir-221 | CRB1    | -0.48 |
| hsa-mir-221 | CRIM1   | 0.5   |
| hsa-mir-221 | CSTF2T  | -0.26 |
| hsa-mir-221 | CXCL14  | 0.48  |
| hsa-mir-221 | CXCR7   | -0.34 |
| hsa-mir-221 | CXXC4   | -0.48 |
| hsa-mir-221 | CYB5R2  | 0.32  |
| hsa-mir-221 | DAAM1   | -0.04 |
| hsa-mir-221 | DCBLD2  | 0.45  |
| hsa-mir-221 | DCX     | -0.46 |
| hsa-mir-221 | DDIT4L  | 0.25  |
| hsa-mir-221 | DKK1    | 0.41  |
| hsa-mir-221 | DLC1    | 0.46  |
| hsa-mir-221 | DLL1    | -0.53 |
| hsa-mir-221 | DLL3    | -0.45 |
| hsa-mir-221 | DNAJB5  | -0.4  |
| hsa-mir-221 | DNER    | -0.39 |
| hsa-mir-221 | DPP4    | 0.41  |
| hsa-mir-221 | DUSP5   | 0.45  |
| hsa-mir-221 | DYNLT3  | 0.51  |
| hsa-mir-221 | EBF3    | -0.39 |
| hsa-mir-221 | EFNB2   | 0.48  |
| hsa-mir-221 | EFS     | -0.34 |
| hsa-mir-221 | ELMOD1  | 0.44  |
| hsa-mir-221 | ELOVL2  | 0.29  |
| hsa-mir-221 | EML1    | 0.45  |
| hsa-mir-221 | EMP1    | 0.38  |
| hsa-mir-221 | ENDOD1  | 0.48  |
| hsa-mir-221 | EPC1    | -0.44 |
| hsa-mir-221 | EPHA2   | 0.4   |
| hsa-mir-221 | EPHB1   | -0.44 |
| hsa-mir-221 | EREG    | 0.32  |
| hsa-mir-221 | ERRFI1  | 0.42  |
| hsa-mir-221 | FADS2   | -0.38 |
| hsa-mir-221 | FAM3C   | 0.37  |
| hsa-mir-221 | FAM77C  | -0.41 |
| hsa-mir-221 | FAM84A  | 0.42  |

|             |           |       |
|-------------|-----------|-------|
| hsa-mir-221 | FAM89A    | -0.37 |
| hsa-mir-221 | FBLN5     | 0.21  |
| hsa-mir-221 | FBXO17    | 0.22  |
| hsa-mir-221 | FEZ1      | -0.27 |
| hsa-mir-221 | FHL2      | 0.5   |
| hsa-mir-221 | FLJ21963  | 0.54  |
| hsa-mir-221 | FUT9      | -0.33 |
| hsa-mir-221 | FZD7      | 0.44  |
| hsa-mir-221 | FZD8      | 0.32  |
| hsa-mir-221 | GADD45G   | -0.5  |
| hsa-mir-221 | GDF15     | 0.38  |
| hsa-mir-221 | GJA1      | 0.23  |
| hsa-mir-221 | GLCCI1    | -0.55 |
| hsa-mir-221 | GNA14     | 0.41  |
| hsa-mir-221 | GPR23     | -0.46 |
| hsa-mir-221 | GRIK1     | 0.14  |
| hsa-mir-221 | GUSBL1    | -0.35 |
| hsa-mir-221 | H1FX      | -0.4  |
| hsa-mir-221 | HES5      | -0.45 |
| hsa-mir-221 | HES6      | -0.55 |
| hsa-mir-221 | HMGA2     | 0.32  |
| hsa-mir-221 | HRASLS    | -0.34 |
| hsa-mir-221 | HRH1      | 0.44  |
| hsa-mir-221 | HS3ST3B1  | 0.34  |
| hsa-mir-221 | IDS       | 0.54  |
| hsa-mir-221 | IGFBP6    | 0.46  |
| hsa-mir-221 | IKIP      | 0.25  |
| hsa-mir-221 | ITGA3     | 0.47  |
| hsa-mir-221 | JAKMIP1   | -0.19 |
| hsa-mir-221 | KCNN3     | -0.26 |
| hsa-mir-221 | KIAA1199  | 0.39  |
| hsa-mir-221 | KIAA1706  | -0.44 |
| hsa-mir-221 | KLHDC9    | 0.2   |
| hsa-mir-221 | KLHL29    | 0.3   |
| hsa-mir-221 | KLRC1     | -0.35 |
| hsa-mir-221 | KLRC2     | -0.36 |
| hsa-mir-221 | KLRC3     | -0.41 |
| hsa-mir-221 | LGALS3    | 0.47  |
| hsa-mir-221 | LGALS8    | 0.44  |
| hsa-mir-221 | LIN7A     | 0.38  |
| hsa-mir-221 | LMO2      | 0.3   |
| hsa-mir-221 | LOC150223 | 0.37  |
| hsa-mir-221 | LOC493869 | 0.37  |
| hsa-mir-221 | LRP6      | -0.43 |
| hsa-mir-221 | LRRC1     | -0.42 |
| hsa-mir-221 | LRRC16    | 0.39  |
| hsa-mir-221 | LRRC2     | 0.11  |
| hsa-mir-221 | LRRC8D    | -0.48 |
| hsa-mir-221 | LZTS1     | 0.43  |
| hsa-mir-221 | MAOB      | 0.15  |
| hsa-mir-221 | MAPK4     | -0.05 |
| hsa-mir-221 | MARCKSL1  | -0.48 |
| hsa-mir-221 | MAST1     | -0.33 |

|             |          |       |
|-------------|----------|-------|
| hsa-mir-221 | MET      | 0.25  |
| hsa-mir-221 | MEX3A    | -0.55 |
| hsa-mir-221 | MGC13057 | -0.37 |
| hsa-mir-221 | MGC4294  | 0.41  |
| hsa-mir-221 | MOBKL2B  | -0.37 |
| hsa-mir-221 | MOSC2    | 0.23  |
| hsa-mir-221 | MOXD1    | 0.41  |
| hsa-mir-221 | MST150   | 0.49  |
| hsa-mir-221 | MSTN     | -0.43 |
| hsa-mir-221 | MTSS1    | -0.41 |
| hsa-mir-221 | NBPF1    | -0.29 |
| hsa-mir-221 | NCAM2    | -0.29 |
| hsa-mir-221 | NEDD9    | 0.42  |
| hsa-mir-221 | NEK10    | 0.37  |
| hsa-mir-221 | NEK6     | 0.46  |
| hsa-mir-221 | NEU4     | -0.48 |
| hsa-mir-221 | NFIB     | -0.46 |
| hsa-mir-221 | NHEDC1   | -0.24 |
| hsa-mir-221 | NKD1     | -0.41 |
| hsa-mir-221 | NPAS2    | 0.45  |
| hsa-mir-221 | NPNT     | 0.23  |
| hsa-mir-221 | NR0B1    | -0.35 |
| hsa-mir-221 | NR2E1    | 0.3   |
| hsa-mir-221 | NRIP1    | 0.25  |
| hsa-mir-221 | NT5E     | 0.42  |
| hsa-mir-221 | NXPH1    | -0.29 |
| hsa-mir-221 | OCIAD2   | 0.32  |
| hsa-mir-221 | OSBPL3   | 0.42  |
| hsa-mir-221 | OSMR     | 0.42  |
| hsa-mir-221 | OVOS2    | -0.47 |
| hsa-mir-221 | P2RX7    | -0.34 |
| hsa-mir-221 | PBEF1    | 0.31  |
| hsa-mir-221 | PCSK1    | 0.33  |
| hsa-mir-221 | PCSK5    | 0.44  |
| hsa-mir-221 | PDGFRA   | -0.39 |
| hsa-mir-221 | PDLIM4   | 0.39  |
| hsa-mir-221 | PGCP     | 0.4   |
| hsa-mir-221 | PHGDH    | -0.45 |
| hsa-mir-221 | PHLDA3   | 0.38  |
| hsa-mir-221 | PI16     | -0.26 |
| hsa-mir-221 | PIK3R3   | -0.41 |
| hsa-mir-221 | PKIB     | 0.48  |
| hsa-mir-221 | PLA2G5   | 0.42  |
| hsa-mir-221 | PLAG1    | 0.43  |
| hsa-mir-221 | PLAU     | 0.36  |
| hsa-mir-221 | PLK3     | 0.42  |
| hsa-mir-221 | PLS3     | 0.52  |
| hsa-mir-221 | PNPLA3   | 0.25  |
| hsa-mir-221 | PNPLA4   | 0.3   |
| hsa-mir-221 | POPDC3   | 0.17  |
| hsa-mir-221 | POSTN    | 0.44  |
| hsa-mir-221 | PRTFDC1  | -0.49 |
| hsa-mir-221 | PSAT1    | -0.42 |

|             |             |       |
|-------------|-------------|-------|
| hsa-mir-221 | PTGS1       | 0.35  |
| hsa-mir-221 | PTHLH       | 0.35  |
| hsa-mir-221 | PTX3        | 0.36  |
| hsa-mir-221 | PVRL3       | 0.27  |
| hsa-mir-221 | PYGL        | 0.32  |
| hsa-mir-221 | RAB33A      | -0.4  |
| hsa-mir-221 | RAB34       | 0.49  |
| hsa-mir-221 | RAB36       | 0.38  |
| hsa-mir-221 | RARRES2     | 0.18  |
| hsa-mir-221 | RASD1       | -0.12 |
| hsa-mir-221 | RASL12      | -0.27 |
| hsa-mir-221 | RBMS1       | 0.38  |
| hsa-mir-221 | RCAN3       | 0.41  |
| hsa-mir-221 | REC8        | -0.38 |
| hsa-mir-221 | RGN         | 0.07  |
| hsa-mir-221 | RGS17       | 0.38  |
| hsa-mir-221 | RGS6        | 0.38  |
| hsa-mir-221 | RHBDL3      | -0.39 |
| hsa-mir-221 | RIN1        | 0.56  |
| hsa-mir-221 | RNF128      | 0.38  |
| hsa-mir-221 | RP11-35N6.1 | -0.45 |
| hsa-mir-221 | RPRM        | -0.4  |
| hsa-mir-221 | S100A13     | 0.32  |
| hsa-mir-221 | SAA1        | 0.17  |
| hsa-mir-221 | SALL3       | -0.43 |
| hsa-mir-221 | SCG2        | 0.42  |
| hsa-mir-221 | SCN3A       | -0.37 |
| hsa-mir-221 | SERPINE1    | 0.41  |
| hsa-mir-221 | SHD         | -0.48 |
| hsa-mir-221 | SHROOM3     | 0.52  |
| hsa-mir-221 | SIPA1L1     | 0.46  |
| hsa-mir-221 | SLC1A2      | 0.2   |
| hsa-mir-221 | SLC20A1     | 0.47  |
| hsa-mir-221 | SMOC1       | -0.46 |
| hsa-mir-221 | SNFT        | 0.32  |
| hsa-mir-221 | SOX4        | -0.52 |
| hsa-mir-221 | SOX5        | -0.37 |
| hsa-mir-221 | SPRY2       | 0.46  |
| hsa-mir-221 | SRPX        | 0.37  |
| hsa-mir-221 | STEAP3      | 0.37  |
| hsa-mir-221 | STH         | -0.35 |
| hsa-mir-221 | STOX2       | -0.31 |
| hsa-mir-221 | SUSD5       | -0.32 |
| hsa-mir-221 | SWAP70      | 0.51  |
| hsa-mir-221 | TASP1       | 0.38  |
| hsa-mir-221 | TCEA3       | 0.34  |
| hsa-mir-221 | TCF7L1      | -0.43 |
| hsa-mir-221 | TFCP2L1     | 0.33  |
| hsa-mir-221 | THNSL2      | 0.13  |
| hsa-mir-221 | TIMP1       | 0.44  |
| hsa-mir-221 | TMEM154     | 0.4   |
| hsa-mir-221 | TMEPAI      | 0.46  |
| hsa-mir-221 | TMSL8       | -0.38 |

|             |           |       |
|-------------|-----------|-------|
| hsa-mir-221 | TNFRSF12A | 0.38  |
| hsa-mir-221 | TNFSF4    | 0.49  |
| hsa-mir-221 | TOX3      | -0.43 |
| hsa-mir-221 | TRIP4     | 0.37  |
| hsa-mir-221 | TSLP      | 0.33  |
| hsa-mir-221 | TTC12     | 0.41  |
| hsa-mir-221 | UPP1      | 0.38  |
| hsa-mir-221 | USP53     | 0.46  |
| hsa-mir-221 | VASN      | 0.32  |
| hsa-mir-221 | VIPR2     | -0.48 |
| hsa-mir-221 | WWTR1     | 0.44  |
| hsa-mir-221 | ZBTB5     | -0.49 |
| hsa-mir-221 | ZNF22     | -0.41 |
| hsa-mir-221 | ZNF642    | -0.35 |
| hsa-mir-221 | ZNF704    | -0.38 |
| hsa-mir-222 | AADAACL1  | 0.46  |
| hsa-mir-222 | ABAT      | -0.4  |
| hsa-mir-222 | ACSBG1    | 0.13  |
| hsa-mir-222 | ADAM12    | 0.38  |
| hsa-mir-222 | ADHFE1    | -0.36 |
| hsa-mir-222 | AFAP1L2   | -0.32 |
| hsa-mir-222 | AGPAT2    | 0.46  |
| hsa-mir-222 | AGT       | -0.11 |
| hsa-mir-222 | AHNAK2    | 0.43  |
| hsa-mir-222 | ALG11     | 0.3   |
| hsa-mir-222 | ALS2CR13  | -0.5  |
| hsa-mir-222 | ANKRD13B  | -0.49 |
| hsa-mir-222 | ANKRD35   | 0.19  |
| hsa-mir-222 | ANXA2     | 0.46  |
| hsa-mir-222 | ANXA4     | 0.46  |
| hsa-mir-222 | APLP2     | 0.48  |
| hsa-mir-222 | AQP4      | -0.1  |
| hsa-mir-222 | AQP5      | 0.09  |
| hsa-mir-222 | ARHGAP29  | 0.37  |
| hsa-mir-222 | ARL9      | 0.41  |
| hsa-mir-222 | ARPP-21   | -0.22 |
| hsa-mir-222 | ARSJ      | 0.52  |
| hsa-mir-222 | ASCL1     | -0.55 |
| hsa-mir-222 | ASS1      | 0.37  |
| hsa-mir-222 | ATP1A2    | -0.19 |
| hsa-mir-222 | ATP1A3    | 0.45  |
| hsa-mir-222 | BAIAP3    | -0.08 |
| hsa-mir-222 | BCAN      | -0.48 |
| hsa-mir-222 | BCAT1     | 0.42  |
| hsa-mir-222 | BHLHB2    | 0.4   |
| hsa-mir-222 | BIRC3     | 0.46  |
| hsa-mir-222 | BRWD3     | -0.37 |
| hsa-mir-222 | C10orf107 | 0.09  |
| hsa-mir-222 | C11orf63  | 0.23  |
| hsa-mir-222 | C12orf34  | -0.52 |
| hsa-mir-222 | C13orf18  | 0.32  |
| hsa-mir-222 | C14orf50  | 0.02  |
| hsa-mir-222 | C18orf18  | -0.36 |



|             |          |       |
|-------------|----------|-------|
| hsa-mir-222 | C19orf57 | -0.46 |
| hsa-mir-222 | C1orf198 | -0.41 |
| hsa-mir-222 | C1QL1    | -0.42 |
| hsa-mir-222 | C1QTNF5  | -0.29 |
| hsa-mir-222 | C20orf42 | -0.43 |
| hsa-mir-222 | C21orf63 | 0.35  |
| hsa-mir-222 | C2orf32  | -0.3  |
| hsa-mir-222 | C5orf33  | 0.08  |
| hsa-mir-222 | C6orf134 | -0.46 |
| hsa-mir-222 | C6orf141 | 0.51  |
| hsa-mir-222 | C9orf18  | -0.2  |
| hsa-mir-222 | C9orf61  | -0.22 |
| hsa-mir-222 | C9orf89  | 0.36  |
| hsa-mir-222 | CACNA2D4 | 0.44  |
| hsa-mir-222 | CAMKV    | -0.28 |
| hsa-mir-222 | CASP1    | 0.4   |
| hsa-mir-222 | CASP9    | -0.38 |
| hsa-mir-222 | CBR1     | 0.19  |
| hsa-mir-222 | CCDC109B | 0.43  |
| hsa-mir-222 | CCDC88A  | -0.38 |
| hsa-mir-222 | CCL20    | 0.37  |
| hsa-mir-222 | CCL27    | -0.12 |
| hsa-mir-222 | CD59     | 0.48  |
| hsa-mir-222 | CD63     | 0.42  |
| hsa-mir-222 | CD70     | 0.43  |
| hsa-mir-222 | CD97     | 0.47  |
| hsa-mir-222 | CDH4     | 0.16  |
| hsa-mir-222 | CDO1     | -0.1  |
| hsa-mir-222 | CELSR3   | -0.39 |
| hsa-mir-222 | CEP55    | 0     |
| hsa-mir-222 | CFI      | 0.4   |
| hsa-mir-222 | CHCHD7   | 0.42  |
| hsa-mir-222 | CHD7     | -0.56 |
| hsa-mir-222 | CHI3L2   | 0.09  |
| hsa-mir-222 | CHL1     | 0.24  |
| hsa-mir-222 | CHST2    | 0.61  |
| hsa-mir-222 | CHST9    | -0.47 |
| hsa-mir-222 | CLASP2   | -0.48 |
| hsa-mir-222 | CLDN1    | 0.39  |
| hsa-mir-222 | CLDN23   | 0.54  |
| hsa-mir-222 | CLGN     | -0.34 |
| hsa-mir-222 | CLIC1    | 0.52  |
| hsa-mir-222 | CNIH3    | 0.59  |
| hsa-mir-222 | CNTN3    | -0.32 |
| hsa-mir-222 | CNTNAP3  | 0.4   |
| hsa-mir-222 | COL11A1  | -0.26 |
| hsa-mir-222 | COL12A1  | 0.31  |
| hsa-mir-222 | COL13A1  | 0.43  |
| hsa-mir-222 | COL7A1   | 0.06  |
| hsa-mir-222 | COL9A1   | -0.4  |
| hsa-mir-222 | COP1     | 0.43  |
| hsa-mir-222 | CPNE4    | 0.35  |
| hsa-mir-222 | CPNE8    | 0.36  |

|             |          |       |
|-------------|----------|-------|
| hsa-mir-222 | CRB1     | -0.58 |
| hsa-mir-222 | CREB3L1  | 0.39  |
| hsa-mir-222 | CRIM1    | 0.43  |
| hsa-mir-222 | CSGlcA-T | 0.43  |
| hsa-mir-222 | CTGLF5   | -0.33 |
| hsa-mir-222 | CTSB     | 0.46  |
| hsa-mir-222 | CTSC     | 0.4   |
| hsa-mir-222 | CTTNBP2  | -0.45 |
| hsa-mir-222 | CUGBP2   | -0.36 |
| hsa-mir-222 | CXCL14   | 0.54  |
| hsa-mir-222 | CXCR7    | -0.31 |
| hsa-mir-222 | CXorf57  | -0.15 |
| hsa-mir-222 | CXXC4    | -0.52 |
| hsa-mir-222 | CXXC6    | -0.38 |
| hsa-mir-222 | CYB5R2   | 0.41  |
| hsa-mir-222 | CYP26A1  | 0.22  |
| hsa-mir-222 | DCBLD2   | 0.46  |
| hsa-mir-222 | DCTD     | 0.44  |
| hsa-mir-222 | DCX      | -0.55 |
| hsa-mir-222 | DDIT4L   | 0.26  |
| hsa-mir-222 | DGKB     | -0.38 |
| hsa-mir-222 | DIP2B    | -0.38 |
| hsa-mir-222 | DKK1     | 0.4   |
| hsa-mir-222 | DLC1     | 0.44  |
| hsa-mir-222 | DLEC1    | -0.2  |
| hsa-mir-222 | DLL1     | -0.63 |
| hsa-mir-222 | DLL3     | -0.49 |
| hsa-mir-222 | DNAJB5   | -0.45 |
| hsa-mir-222 | DNER     | -0.41 |
| hsa-mir-222 | DOK6     | -0.25 |
| hsa-mir-222 | DPP4     | 0.49  |
| hsa-mir-222 | DPYD     | 0.33  |
| hsa-mir-222 | DSCAML1  | -0.47 |
| hsa-mir-222 | DUSP26   | -0.44 |
| hsa-mir-222 | DUSP5    | 0.42  |
| hsa-mir-222 | DYNLT3   | 0.52  |
| hsa-mir-222 | EBF3     | -0.45 |
| hsa-mir-222 | EDN1     | -0.02 |
| hsa-mir-222 | EFEMP2   | 0.49  |
| hsa-mir-222 | EFNB2    | 0.41  |
| hsa-mir-222 | EFS      | -0.35 |
| hsa-mir-222 | EGFR     | 0.02  |
| hsa-mir-222 | EHBP1L1  | 0.48  |
| hsa-mir-222 | ELMOD1   | 0.41  |
| hsa-mir-222 | ELOVL2   | 0.23  |
| hsa-mir-222 | EML1     | 0.45  |
| hsa-mir-222 | EMP1     | 0.37  |
| hsa-mir-222 | ENAH     | -0.48 |
| hsa-mir-222 | ENDOD1   | 0.47  |
| hsa-mir-222 | EPC1     | -0.47 |
| hsa-mir-222 | EPDR1    | 0.37  |
| hsa-mir-222 | EPHA2    | 0.47  |
| hsa-mir-222 | EPHB1    | -0.53 |

|             |          |       |
|-------------|----------|-------|
| hsa-mir-222 | EPHX2    | 0.19  |
| hsa-mir-222 | EREG     | 0.39  |
| hsa-mir-222 | ERRFI1   | 0.44  |
| hsa-mir-222 | ETV5     | 0.42  |
| hsa-mir-222 | EXPH5    | -0.2  |
| hsa-mir-222 | EYA1     | -0.3  |
| hsa-mir-222 | F2RL1    | 0.22  |
| hsa-mir-222 | FADS2    | -0.42 |
| hsa-mir-222 | FAM108C1 | 0.31  |
| hsa-mir-222 | FAM123A  | -0.28 |
| hsa-mir-222 | FAM123B  | -0.39 |
| hsa-mir-222 | FAM77C   | -0.42 |
| hsa-mir-222 | FBLIM1   | 0.43  |
| hsa-mir-222 | FBLN5    | 0.24  |
| hsa-mir-222 | FBXL16   | -0.24 |
| hsa-mir-222 | FBXO17   | 0.25  |
| hsa-mir-222 | FGF12    | -0.24 |
| hsa-mir-222 | FGFR3    | 0.03  |
| hsa-mir-222 | FHL2     | 0.52  |
| hsa-mir-222 | FLJ21963 | 0.53  |
| hsa-mir-222 | FLJ25791 | -0.39 |
| hsa-mir-222 | FNDC3B   | 0.34  |
| hsa-mir-222 | FOXG1    | 0.15  |
| hsa-mir-222 | FOXN4    | -0.43 |
| hsa-mir-222 | FST      | 0.29  |
| hsa-mir-222 | FUT9     | -0.41 |
| hsa-mir-222 | FZD7     | 0.48  |
| hsa-mir-222 | GADD45G  | -0.58 |
| hsa-mir-222 | GALNT13  | -0.39 |
| hsa-mir-222 | GALNT5   | 0.43  |
| hsa-mir-222 | GALNT7   | 0.24  |
| hsa-mir-222 | GDF15    | 0.41  |
| hsa-mir-222 | GFPT2    | 0.32  |
| hsa-mir-222 | GJA1     | 0.27  |
| hsa-mir-222 | GJB2     | 0.45  |
| hsa-mir-222 | GLCCI1   | -0.59 |
| hsa-mir-222 | GLT8D4   | 0.4   |
| hsa-mir-222 | GNA14    | 0.36  |
| hsa-mir-222 | GNA15    | 0.4   |
| hsa-mir-222 | GNG4     | -0.54 |
| hsa-mir-222 | GPR137C  | -0.38 |
| hsa-mir-222 | GPR23    | -0.48 |
| hsa-mir-222 | GRIA2    | -0.32 |
| hsa-mir-222 | GRIK2    | -0.25 |
| hsa-mir-222 | GSTA4    | -0.48 |
| hsa-mir-222 | GSX2     | -0.24 |
| hsa-mir-222 | H2AFY2   | -0.27 |
| hsa-mir-222 | HES5     | -0.54 |
| hsa-mir-222 | HES6     | -0.52 |
| hsa-mir-222 | HEXB     | 0.43  |
| hsa-mir-222 | HEY2     | -0.27 |
| hsa-mir-222 | HFM1     | -0.49 |
| hsa-mir-222 | HIST1H4C | -0.32 |

|             |          |       |
|-------------|----------|-------|
| hsa-mir-222 | HMGA2    | 0.4   |
| hsa-mir-222 | HOXB6    | 0.42  |
| hsa-mir-222 | HOXD3    | -0.42 |
| hsa-mir-222 | HPR      | 0.14  |
| hsa-mir-222 | HRASLS   | -0.35 |
| hsa-mir-222 | HRH1     | 0.43  |
| hsa-mir-222 | HS3ST3B1 | 0.35  |
| hsa-mir-222 | ICAM3    | 0.53  |
| hsa-mir-222 | ID4      | -0.34 |
| hsa-mir-222 | IDS      | 0.57  |
| hsa-mir-222 | IGFBP6   | 0.52  |
| hsa-mir-222 | IGSF9    | -0.42 |
| hsa-mir-222 | IKIP     | 0.31  |
| hsa-mir-222 | IL11RA   | -0.24 |
| hsa-mir-222 | IL8      | 0.37  |
| hsa-mir-222 | INSM1    | -0.25 |
| hsa-mir-222 | IRX2     | -0.32 |
| hsa-mir-222 | ITPR3    | 0.4   |
| hsa-mir-222 | JAKMIP1  | -0.24 |
| hsa-mir-222 | JMJD1C   | -0.42 |
| hsa-mir-222 | KBTBD7   | -0.34 |
| hsa-mir-222 | KCND2    | -0.41 |
| hsa-mir-222 | KCNH8    | -0.45 |
| hsa-mir-222 | KCNN4    | 0.47  |
| hsa-mir-222 | KDELR3   | 0.51  |
| hsa-mir-222 | KIAA0182 | -0.36 |
| hsa-mir-222 | KIAA0241 | 0.32  |
| hsa-mir-222 | KIAA0802 | 0.1   |
| hsa-mir-222 | KIAA1166 | -0.47 |
| hsa-mir-222 | KIAA1199 | 0.46  |
| hsa-mir-222 | KIAA1505 | -0.19 |
| hsa-mir-222 | KIAA1549 | -0.49 |
| hsa-mir-222 | KIAA1706 | -0.47 |
| hsa-mir-222 | KIAA1799 | -0.37 |
| hsa-mir-222 | KIAA1958 | -0.45 |
| hsa-mir-222 | KIF1A    | -0.36 |
| hsa-mir-222 | KIF1B    | -0.37 |
| hsa-mir-222 | KIT      | -0.3  |
| hsa-mir-222 | KLF5     | 0.34  |
| hsa-mir-222 | KLHDC9   | 0.22  |
| hsa-mir-222 | KLHL23   | -0.51 |
| hsa-mir-222 | KLRC1    | -0.35 |
| hsa-mir-222 | KLRC2    | -0.38 |
| hsa-mir-222 | KLRC3    | -0.43 |
| hsa-mir-222 | LAMB3    | 0.28  |
| hsa-mir-222 | LDHA     | 0.34  |
| hsa-mir-222 | LDLR     | 0.36  |
| hsa-mir-222 | LEF1     | 0.29  |
| hsa-mir-222 | LGALS1   | 0.47  |
| hsa-mir-222 | LGALS3   | 0.52  |
| hsa-mir-222 | LGALS8   | 0.52  |
| hsa-mir-222 | LIX1     | -0.22 |
| hsa-mir-222 | LMO2     | 0.32  |

|             |           |       |
|-------------|-----------|-------|
| hsa-mir-222 | LOC129881 | -0.27 |
| hsa-mir-222 | LOC150223 | 0.41  |
| hsa-mir-222 | LOC165186 | -0.2  |
| hsa-mir-222 | LOC26010  | 0.5   |
| hsa-mir-222 | LOC285382 | -0.35 |
| hsa-mir-222 | LOC493869 | 0.44  |
| hsa-mir-222 | LOC541471 | 0.55  |
| hsa-mir-222 | LOC55565  | -0.5  |
| hsa-mir-222 | LOC57228  | 0.49  |
| hsa-mir-222 | LOC653391 | -0.35 |
| hsa-mir-222 | LOXL1     | 0.43  |
| hsa-mir-222 | LOXL4     | 0.42  |
| hsa-mir-222 | LRCH2     | -0.45 |
| hsa-mir-222 | LRP2BP    | -0.38 |
| hsa-mir-222 | LRP6      | -0.46 |
| hsa-mir-222 | LRRC1     | -0.43 |
| hsa-mir-222 | LRRC16    | 0.41  |
| hsa-mir-222 | LRRC2     | 0.13  |
| hsa-mir-222 | LRRC34    | 0     |
| hsa-mir-222 | LRRC8D    | -0.48 |
| hsa-mir-222 | LRRC8E    | 0.39  |
| hsa-mir-222 | LRRIQ2    | -0.47 |
| hsa-mir-222 | LUM       | 0.3   |
| hsa-mir-222 | LUZP2     | -0.38 |
| hsa-mir-222 | LY96      | 0.42  |
| hsa-mir-222 | LZTS1     | 0.47  |
| hsa-mir-222 | MAN2A1    | 0.38  |
| hsa-mir-222 | MAOB      | 0.15  |
| hsa-mir-222 | MARCKSL1  | -0.52 |
| hsa-mir-222 | MAST1     | -0.37 |
| hsa-mir-222 | MCHR1     | 0.34  |
| hsa-mir-222 | MCM3APAS  | -0.46 |
| hsa-mir-222 | MEGF11    | -0.36 |
| hsa-mir-222 | MEOX2     | 0.21  |
| hsa-mir-222 | MET       | 0.3   |
| hsa-mir-222 | MEX3A     | -0.56 |
| hsa-mir-222 | MEX3B     | -0.45 |
| hsa-mir-222 | MGC13057  | -0.41 |
| hsa-mir-222 | MGC14425  | -0.49 |
| hsa-mir-222 | MGC42105  | -0.31 |
| hsa-mir-222 | MGC4294   | 0.39  |
| hsa-mir-222 | MGC7036   | 0.44  |
| hsa-mir-222 | MKRN3     | -0.49 |
| hsa-mir-222 | MNX1      | -0.35 |
| hsa-mir-222 | MOSC2     | 0.19  |
| hsa-mir-222 | MOXD1     | 0.42  |
| hsa-mir-222 | MPDZ      | -0.29 |
| hsa-mir-222 | MRCL3     | 0.42  |
| hsa-mir-222 | MRPL17    | 0.35  |
| hsa-mir-222 | MST150    | 0.56  |
| hsa-mir-222 | MSTN      | -0.46 |
| hsa-mir-222 | MTSS1     | -0.48 |
| hsa-mir-222 | MXRA7     | 0.46  |

|             |         |       |
|-------------|---------|-------|
| hsa-mir-222 | MYCBPAP | -0.04 |
| hsa-mir-222 | MYH7    | -0.33 |
| hsa-mir-222 | MYO5C   | 0.03  |
| hsa-mir-222 | MYT1    | -0.48 |
| hsa-mir-222 | N4BP2   | -0.36 |
| hsa-mir-222 | NAP1L3  | -0.27 |
| hsa-mir-222 | NAP5    | -0.39 |
| hsa-mir-222 | NBPF1   | -0.37 |
| hsa-mir-222 | NCALD   | -0.31 |
| hsa-mir-222 | NCAM2   | -0.32 |
| hsa-mir-222 | NCAN    | -0.42 |
| hsa-mir-222 | NEK6    | 0.48  |
| hsa-mir-222 | NEO1    | 0.04  |
| hsa-mir-222 | NEU4    | -0.5  |
| hsa-mir-222 | NEUROD4 | -0.4  |
| hsa-mir-222 | NFIA    | -0.46 |
| hsa-mir-222 | NFIB    | -0.53 |
| hsa-mir-222 | NHEDC1  | -0.33 |
| hsa-mir-222 | NKX2-2  | -0.35 |
| hsa-mir-222 | NMU     | -0.18 |
| hsa-mir-222 | NOL4    | -0.36 |
| hsa-mir-222 | NPAS2   | 0.54  |
| hsa-mir-222 | NPY2R   | 0.22  |
| hsa-mir-222 | NR0B1   | -0.34 |
| hsa-mir-222 | NR2E1   | 0.28  |
| hsa-mir-222 | NRIP1   | 0.3   |
| hsa-mir-222 | NRXN1   | -0.43 |
| hsa-mir-222 | NSUN6   | -0.37 |
| hsa-mir-222 | NT5E    | 0.39  |
| hsa-mir-222 | NTSR2   | -0.17 |
| hsa-mir-222 | NXPH1   | -0.37 |
| hsa-mir-222 | OAF     | 0.47  |
| hsa-mir-222 | OCIAD2  | 0.38  |
| hsa-mir-222 | OLIG2   | -0.34 |
| hsa-mir-222 | OMG     | -0.35 |
| hsa-mir-222 | OPHN1   | -0.47 |
| hsa-mir-222 | OR4N4   | -0.36 |
| hsa-mir-222 | OSBPL10 | 0.47  |
| hsa-mir-222 | OSBPL11 | -0.3  |
| hsa-mir-222 | OSBPL3  | 0.42  |
| hsa-mir-222 | OVOS2   | -0.45 |
| hsa-mir-222 | P2RX7   | -0.36 |
| hsa-mir-222 | P4HA2   | 0.45  |
| hsa-mir-222 | PABPC5  | -0.41 |
| hsa-mir-222 | PAK3    | -0.3  |
| hsa-mir-222 | PAK7    | -0.43 |
| hsa-mir-222 | PARVB   | 0.37  |
| hsa-mir-222 | PBEF1   | 0.37  |
| hsa-mir-222 | PCDH15  | -0.39 |
| hsa-mir-222 | PCDH7   | -0.34 |
| hsa-mir-222 | PCSK1   | 0.37  |
| hsa-mir-222 | PDE9A   | -0.37 |
| hsa-mir-222 | PDGFRA  | -0.37 |

|             |           |       |
|-------------|-----------|-------|
| hsa-mir-222 | PDLIM4    | 0.41  |
| hsa-mir-222 | PDPN      | 0.36  |
| hsa-mir-222 | PDZRN4    | -0.41 |
| hsa-mir-222 | PERP      | 0.35  |
| hsa-mir-222 | PFKFB2    | -0.34 |
| hsa-mir-222 | PGAM2     | -0.27 |
| hsa-mir-222 | PHACTR3   | -0.45 |
| hsa-mir-222 | PHGDH     | -0.5  |
| hsa-mir-222 | PHKA2     | -0.01 |
| hsa-mir-222 | PHLDA2    | 0.42  |
| hsa-mir-222 | PHLDA3    | 0.41  |
| hsa-mir-222 | PHYHIPL   | -0.49 |
| hsa-mir-222 | PI16      | -0.26 |
| hsa-mir-222 | PIGB      | 0.43  |
| hsa-mir-222 | PIK3R3    | -0.46 |
| hsa-mir-222 | PKIB      | 0.42  |
| hsa-mir-222 | PLA2G2A   | 0.25  |
| hsa-mir-222 | PLA2G5    | 0.41  |
| hsa-mir-222 | PLAU      | 0.46  |
| hsa-mir-222 | PLAUR     | 0.48  |
| hsa-mir-222 | PLCB4     | -0.39 |
| hsa-mir-222 | PLEKHG1   | 0.28  |
| hsa-mir-222 | PLS3      | 0.5   |
| hsa-mir-222 | PMAIP1    | 0.32  |
| hsa-mir-222 | PNPLA3    | 0.29  |
| hsa-mir-222 | PODNL1    | 0.48  |
| hsa-mir-222 | POSTN     | 0.48  |
| hsa-mir-222 | PPAPDC3   | -0.27 |
| hsa-mir-222 | PPFIBP1   | 0.22  |
| hsa-mir-222 | PPP1R1B   | -0.2  |
| hsa-mir-222 | PPP1R3B   | 0.37  |
| hsa-mir-222 | PRKX      | -0.41 |
| hsa-mir-222 | PROM1     | -0.27 |
| hsa-mir-222 | PRTFDC1   | -0.48 |
| hsa-mir-222 | PSAT1     | -0.43 |
| hsa-mir-222 | PSD2      | -0.41 |
| hsa-mir-222 | PTGS1     | 0.38  |
| hsa-mir-222 | PTX3      | 0.44  |
| hsa-mir-222 | PURG      | -0.39 |
| hsa-mir-222 | PVRL3     | 0.25  |
| hsa-mir-222 | QKI       | -0.43 |
| hsa-mir-222 | RAB11FIP1 | 0.39  |
| hsa-mir-222 | RAB34     | 0.59  |
| hsa-mir-222 | RAMP2     | -0.31 |
| hsa-mir-222 | RARRES2   | 0.22  |
| hsa-mir-222 | RBM12B    | -0.45 |
| hsa-mir-222 | RBMS1     | 0.42  |
| hsa-mir-222 | RCAN3     | 0.39  |
| hsa-mir-222 | REC8      | -0.39 |
| hsa-mir-222 | REV3L     | -0.37 |
| hsa-mir-222 | RGN       | 0.07  |
| hsa-mir-222 | RGS17     | 0.32  |
| hsa-mir-222 | RGS9      | -0.4  |

|             |              |       |
|-------------|--------------|-------|
| hsa-mir-222 | RHBDL3       | -0.48 |
| hsa-mir-222 | RIN1         | 0.6   |
| hsa-mir-222 | RNF128       | 0.35  |
| hsa-mir-222 | RNF145       | 0.3   |
| hsa-mir-222 | RNF165       | -0.48 |
| hsa-mir-222 | RP11-35N6.1  | -0.47 |
| hsa-mir-222 | RP4-691N24.1 | -0.32 |
| hsa-mir-222 | RPRM         | -0.4  |
| hsa-mir-222 | RRAS2        | 0.28  |
| hsa-mir-222 | RUNX1        | 0.42  |
| hsa-mir-222 | S100A13      | 0.36  |
| hsa-mir-222 | S100A16      | 0.42  |
| hsa-mir-222 | S100A4       | 0.4   |
| hsa-mir-222 | S100A8       | 0.32  |
| hsa-mir-222 | SAA1         | 0.24  |
| hsa-mir-222 | SALL3        | -0.52 |
| hsa-mir-222 | SATB1        | -0.4  |
| hsa-mir-222 | SBF2         | -0.16 |
| hsa-mir-222 | SCG2         | 0.4   |
| hsa-mir-222 | SCG3         | -0.36 |
| hsa-mir-222 | SCGB1D1      | -0.18 |
| hsa-mir-222 | SCN3A        | -0.51 |
| hsa-mir-222 | SCUBE2       | -0.26 |
| hsa-mir-222 | SDC4         | 0.48  |
| hsa-mir-222 | SEMA5B       | -0.39 |
| hsa-mir-222 | SERHL        | 0.3   |
| hsa-mir-222 | SERINC5      | -0.31 |
| hsa-mir-222 | SERPINA1     | 0.34  |
| hsa-mir-222 | SERPINE1     | 0.49  |
| hsa-mir-222 | SHD          | -0.52 |
| hsa-mir-222 | SHROOM1      | 0.33  |
| hsa-mir-222 | SHROOM3      | 0.5   |
| hsa-mir-222 | SIM2         | -0.37 |
| hsa-mir-222 | SIPA1L1      | 0.44  |
| hsa-mir-222 | SLC14A1      | -0.19 |
| hsa-mir-222 | SLC16A9      | -0.48 |
| hsa-mir-222 | SLC20A1      | 0.49  |
| hsa-mir-222 | SLC22A18     | 0.52  |
| hsa-mir-222 | SLC2A3       | 0.46  |
| hsa-mir-222 | SLC35D1      | 0.38  |
| hsa-mir-222 | SLC44A1      | -0.32 |
| hsa-mir-222 | SLITRK1      | -0.32 |
| hsa-mir-222 | SMOC1        | -0.48 |
| hsa-mir-222 | SNCAIP       | -0.46 |
| hsa-mir-222 | SNFT         | 0.37  |
| hsa-mir-222 | SOX11        | -0.47 |
| hsa-mir-222 | SOX4         | -0.52 |
| hsa-mir-222 | SOX5         | -0.42 |
| hsa-mir-222 | SOX6         | -0.45 |
| hsa-mir-222 | SOX8         | -0.41 |
| hsa-mir-222 | SPINK1       | 0.3   |
| hsa-mir-222 | SRPX         | 0.36  |
| hsa-mir-222 | SRPX2        | 0.4   |



|             |           |       |
|-------------|-----------|-------|
| hsa-mir-222 | STELLAR   | -0.33 |
| hsa-mir-222 | STH       | -0.44 |
| hsa-mir-222 | STOX2     | -0.42 |
| hsa-mir-222 | STS-1     | 0.46  |
| hsa-mir-222 | SUSD5     | -0.34 |
| hsa-mir-222 | SUV39H2   | -0.35 |
| hsa-mir-222 | SWAP70    | 0.5   |
| hsa-mir-222 | SYNPO2L   | -0.42 |
| hsa-mir-222 | TCEA3     | 0.32  |
| hsa-mir-222 | TCF7L1    | -0.45 |
| hsa-mir-222 | TFPI      | 0.18  |
| hsa-mir-222 | TFPI2     | 0.4   |
| hsa-mir-222 | TGFBI     | 0.33  |
| hsa-mir-222 | TIMP1     | 0.49  |
| hsa-mir-222 | TKTL2     | -0.45 |
| hsa-mir-222 | TMEM166   | 0.23  |
| hsa-mir-222 | TMEM22    | 0.37  |
| hsa-mir-222 | TMEM35    | -0.36 |
| hsa-mir-222 | TMEPAI    | 0.43  |
| hsa-mir-222 | TMIE      | -0.11 |
| hsa-mir-222 | TMPRSS5   | -0.45 |
| hsa-mir-222 | TMSL8     | -0.38 |
| hsa-mir-222 | TMTC2     | 0.02  |
| hsa-mir-222 | TNFAIP6   | 0.33  |
| hsa-mir-222 | TNFRSF10B | 0.39  |
| hsa-mir-222 | TNFRSF12A | 0.45  |
| hsa-mir-222 | TNFSF4    | 0.5   |
| hsa-mir-222 | TOM1L1    | 0.34  |
| hsa-mir-222 | TOP2B     | -0.44 |
| hsa-mir-222 | TOX3      | -0.49 |
| hsa-mir-222 | TPST2     | 0.35  |
| hsa-mir-222 | TRIP4     | 0.39  |
| hsa-mir-222 | TSHZ1     | -0.39 |
| hsa-mir-222 | TSHZ2     | 0.34  |
| hsa-mir-222 | TSLP      | 0.42  |
| hsa-mir-222 | TTC12     | 0.38  |
| hsa-mir-222 | TXNDC16   | -0.38 |
| hsa-mir-222 | UCN       | -0.36 |
| hsa-mir-222 | UGT8      | -0.32 |
| hsa-mir-222 | UPP1      | 0.46  |
| hsa-mir-222 | USP43     | -0.41 |
| hsa-mir-222 | USP52     | -0.36 |
| hsa-mir-222 | UST       | -0.44 |
| hsa-mir-222 | VASN      | 0.4   |
| hsa-mir-222 | VAV3      | 0.34  |
| hsa-mir-222 | VDR       | 0.41  |
| hsa-mir-222 | VIPR2     | -0.5  |
| hsa-mir-222 | VKORC1L1  | 0.37  |
| hsa-mir-222 | VWCE      | -0.42 |
| hsa-mir-222 | WASF1     | -0.27 |
| hsa-mir-222 | WDR5B     | -0.28 |
| hsa-mir-222 | WWTR1     | 0.48  |
| hsa-mir-222 | ZBED3     | -0.39 |

|             |          |       |
|-------------|----------|-------|
| hsa-mir-222 | ZBTB5    | -0.57 |
| hsa-mir-222 | ZDBF2    | 0.11  |
| hsa-mir-222 | ZFAND2A  | 0.25  |
| hsa-mir-222 | ZNF117   | -0.33 |
| hsa-mir-222 | ZNF22    | -0.5  |
| hsa-mir-222 | ZNF235   | -0.36 |
| hsa-mir-222 | ZNF238   | -0.4  |
| hsa-mir-222 | ZNF25    | -0.3  |
| hsa-mir-222 | ZNF397   | -0.51 |
| hsa-mir-222 | ZNF443   | -0.24 |
| hsa-mir-222 | ZNF547   | -0.24 |
| hsa-mir-222 | ZNF610   | -0.32 |
| hsa-mir-222 | ZNF642   | -0.38 |
| hsa-mir-222 | ZNF659   | 0.31  |
| hsa-mir-222 | ZNF704   | -0.43 |
| hsa-mir-222 | ZNF711   | -0.53 |
| hsa-mir-222 | ZSWIM5   | -0.42 |
| hsa-mir-223 | ABCA13   | 0.47  |
| hsa-mir-223 | ABCC3    | 0.58  |
| hsa-mir-223 | ABI3     | 0.51  |
| hsa-mir-223 | ABI3BP   | 0.33  |
| hsa-mir-223 | ACPP     | 0.56  |
| hsa-mir-223 | ADAM28   | 0.44  |
| hsa-mir-223 | ADAM8    | 0.48  |
| hsa-mir-223 | ADFP     | 0.41  |
| hsa-mir-223 | ADORA3   | 0.43  |
| hsa-mir-223 | ADPRH    | 0.5   |
| hsa-mir-223 | AIF1     | 0.49  |
| hsa-mir-223 | AIM1     | 0.5   |
| hsa-mir-223 | ALOX5    | 0.65  |
| hsa-mir-223 | ALOX5AP  | 0.52  |
| hsa-mir-223 | ALPK1    | 0.52  |
| hsa-mir-223 | AMICA1   | 0.54  |
| hsa-mir-223 | AMPD3    | 0.5   |
| hsa-mir-223 | ANXA1    | 0.44  |
| hsa-mir-223 | AOAH     | 0.47  |
| hsa-mir-223 | APOBEC3A | 0.42  |
| hsa-mir-223 | APOBEC3F | 0.51  |
| hsa-mir-223 | APOBEC3H | 0.49  |
| hsa-mir-223 | AQP9     | 0.56  |
| hsa-mir-223 | AREG     | 0.41  |
| hsa-mir-223 | ARHGAP18 | 0.54  |
| hsa-mir-223 | ARHGAP30 | 0.64  |
| hsa-mir-223 | ARHGAP4  | 0.51  |
| hsa-mir-223 | ARHGAP9  | 0.61  |
| hsa-mir-223 | ARHGDIB  | 0.53  |
| hsa-mir-223 | ARID5A   | 0.44  |
| hsa-mir-223 | ARL11    | 0.53  |
| hsa-mir-223 | ATP8B4   | 0.49  |
| hsa-mir-223 | BATF     | 0.56  |
| hsa-mir-223 | BCL2A1   | 0.51  |
| hsa-mir-223 | BCL3     | 0.54  |
| hsa-mir-223 | BDKRB2   | 0.48  |

|             |          |      |
|-------------|----------|------|
| hsa-mir-223 | BIRC3    | 0.52 |
| hsa-mir-223 | BMP2K    | 0.49 |
| hsa-mir-223 | C10orf54 | 0.41 |
| hsa-mir-223 | C11orf45 | 0.48 |
| hsa-mir-223 | C15orf48 | 0.43 |
| hsa-mir-223 | C17orf60 | 0.5  |
| hsa-mir-223 | C17orf87 | 0.47 |
| hsa-mir-223 | C19orf59 | 0.61 |
| hsa-mir-223 | C1orf162 | 0.57 |
| hsa-mir-223 | C1orf38  | 0.57 |
| hsa-mir-223 | C1QA     | 0.46 |
| hsa-mir-223 | C1QB     | 0.52 |
| hsa-mir-223 | C1QC     | 0.47 |
| hsa-mir-223 | C1RL     | 0.54 |
| hsa-mir-223 | C1S      | 0.55 |
| hsa-mir-223 | C21orf7  | 0.38 |
| hsa-mir-223 | C3       | 0.46 |
| hsa-mir-223 | C3AR1    | 0.54 |
| hsa-mir-223 | C5AR1    | 0.62 |
| hsa-mir-223 | C5orf29  | 0.52 |
| hsa-mir-223 | C8orf4   | 0.46 |
| hsa-mir-223 | C9orf135 | 0.35 |
| hsa-mir-223 | C9orf52  | 0.43 |
| hsa-mir-223 | CACNA2D4 | 0.54 |
| hsa-mir-223 | CAMP     | 0.49 |
| hsa-mir-223 | CAPG     | 0.48 |
| hsa-mir-223 | CARD6    | 0.46 |
| hsa-mir-223 | CARD9    | 0.53 |
| hsa-mir-223 | CASP4    | 0.52 |
| hsa-mir-223 | CASP5    | 0.57 |
| hsa-mir-223 | CAST     | 0.57 |
| hsa-mir-223 | CATSPER1 | 0.53 |
| hsa-mir-223 | CCDC50   | 0.35 |
| hsa-mir-223 | CCL13    | 0.42 |
| hsa-mir-223 | CCL2     | 0.51 |
| hsa-mir-223 | CCL20    | 0.52 |
| hsa-mir-223 | CCL26    | 0.43 |
| hsa-mir-223 | CCL5     | 0.46 |
| hsa-mir-223 | CCL7     | 0.53 |
| hsa-mir-223 | CCR1     | 0.48 |
| hsa-mir-223 | CCR2     | 0.49 |
| hsa-mir-223 | CCR5     | 0.6  |
| hsa-mir-223 | CCR7     | 0.46 |
| hsa-mir-223 | CD14     | 0.57 |
| hsa-mir-223 | CD163    | 0.52 |
| hsa-mir-223 | CD1D     | 0.5  |
| hsa-mir-223 | CD2      | 0.51 |
| hsa-mir-223 | CD226    | 0.44 |
| hsa-mir-223 | CD27     | 0.47 |
| hsa-mir-223 | CD300A   | 0.47 |
| hsa-mir-223 | CD300LF  | 0.49 |
| hsa-mir-223 | CD302    | 0.53 |
| hsa-mir-223 | CD33     | 0.53 |

|             |         |       |
|-------------|---------|-------|
| hsa-mir-223 | CD37    | 0.48  |
| hsa-mir-223 | CD44    | 0.52  |
| hsa-mir-223 | CD48    | 0.36  |
| hsa-mir-223 | CD53    | 0.47  |
| hsa-mir-223 | CD68    | 0.46  |
| hsa-mir-223 | CD72    | 0.5   |
| hsa-mir-223 | CD74    | 0.44  |
| hsa-mir-223 | CD84    | 0.49  |
| hsa-mir-223 | CD93    | 0.49  |
| hsa-mir-223 | CDCP1   | 0.52  |
| hsa-mir-223 | CDKN1A  | 0.43  |
| hsa-mir-223 | CEACAM4 | 0.66  |
| hsa-mir-223 | CEBPB   | 0.53  |
| hsa-mir-223 | CEBPD   | 0.54  |
| hsa-mir-223 | CEBPE   | 0.61  |
| hsa-mir-223 | CENTA2  | 0.55  |
| hsa-mir-223 | CFB     | 0.48  |
| hsa-mir-223 | CH25H   | 0.41  |
| hsa-mir-223 | CHI3L1  | 0.45  |
| hsa-mir-223 | CHIT1   | 0.46  |
| hsa-mir-223 | CIITA   | 0.54  |
| hsa-mir-223 | CKB     | -0.48 |
| hsa-mir-223 | CLCF1   | 0.52  |
| hsa-mir-223 | CLDN23  | 0.55  |
| hsa-mir-223 | CLEC10A | 0.55  |
| hsa-mir-223 | CLEC2B  | 0.45  |
| hsa-mir-223 | CLEC4A  | 0.46  |
| hsa-mir-223 | CLEC4D  | 0.54  |
| hsa-mir-223 | CLEC5A  | 0.49  |
| hsa-mir-223 | CLEC7A  | 0.48  |
| hsa-mir-223 | CLECL1  | 0.49  |
| hsa-mir-223 | CMAH    | 0.49  |
| hsa-mir-223 | CMTM7   | 0.49  |
| hsa-mir-223 | COL1A2  | 0.42  |
| hsa-mir-223 | COL6A3  | 0.41  |
| hsa-mir-223 | COL8A1  | 0.45  |
| hsa-mir-223 | COL8A2  | 0.49  |
| hsa-mir-223 | CP      | 0.45  |
| hsa-mir-223 | CPD     | 0.5   |
| hsa-mir-223 | CPVL    | 0.51  |
| hsa-mir-223 | CRTAM   | 0.45  |
| hsa-mir-223 | CRYBB1  | 0.36  |
| hsa-mir-223 | CSF3    | 0.41  |
| hsa-mir-223 | CST6    | 0.44  |
| hsa-mir-223 | CST7    | 0.53  |
| hsa-mir-223 | CSTA    | 0.6   |
| hsa-mir-223 | CTBS    | 0.53  |
| hsa-mir-223 | CTSB    | 0.51  |
| hsa-mir-223 | CTSS    | 0.5   |
| hsa-mir-223 | CTSZ    | 0.5   |
| hsa-mir-223 | CXCL2   | 0.52  |
| hsa-mir-223 | CXCL3   | 0.45  |
| hsa-mir-223 | CXCL5   | 0.45  |

|             |         |       |
|-------------|---------|-------|
| hsa-mir-223 | CXCL6   | 0.51  |
| hsa-mir-223 | CXCR4   | 0.49  |
| hsa-mir-223 | CXorf21 | 0.53  |
| hsa-mir-223 | CXorf9  | 0.53  |
| hsa-mir-223 | CYBB    | 0.52  |
| hsa-mir-223 | CYR61   | 0.47  |
| hsa-mir-223 | DAB2    | 0.5   |
| hsa-mir-223 | DEF6    | 0.52  |
| hsa-mir-223 | DENND1C | 0.52  |
| hsa-mir-223 | DENND2D | 0.53  |
| hsa-mir-223 | DENND3  | 0.44  |
| hsa-mir-223 | DIRAS3  | 0.42  |
| hsa-mir-223 | DKK1    | 0.36  |
| hsa-mir-223 | DMP1    | 0.32  |
| hsa-mir-223 | DOCK2   | 0.43  |
| hsa-mir-223 | DOCK8   | 0.51  |
| hsa-mir-223 | DOK3    | 0.62  |
| hsa-mir-223 | DPEP2   | 0.5   |
| hsa-mir-223 | DPYD    | 0.55  |
| hsa-mir-223 | DRAM    | 0.53  |
| hsa-mir-223 | DSE     | 0.63  |
| hsa-mir-223 | DUSP1   | 0.53  |
| hsa-mir-223 | DUSP27  | 0.36  |
| hsa-mir-223 | DYRK3   | 0.44  |
| hsa-mir-223 | EBI2    | 0.57  |
| hsa-mir-223 | ECGF1   | 0.48  |
| hsa-mir-223 | ECM2    | 0.4   |
| hsa-mir-223 | EDG6    | 0.55  |
| hsa-mir-223 | EFEMP1  | 0.53  |
| hsa-mir-223 | EMB     | 0.53  |
| hsa-mir-223 | EMR3    | 0.5   |
| hsa-mir-223 | ENDOG   | -0.45 |
| hsa-mir-223 | EVI2B   | 0.53  |
| hsa-mir-223 | F13A1   | 0.6   |
| hsa-mir-223 | FAM113B | 0.57  |
| hsa-mir-223 | FAM129A | 0.48  |
| hsa-mir-223 | FAM20A  | 0.49  |
| hsa-mir-223 | FAM26B  | 0.47  |
| hsa-mir-223 | FAM26F  | 0.42  |
| hsa-mir-223 | FAM77C  | -0.41 |
| hsa-mir-223 | FAS     | 0.55  |
| hsa-mir-223 | FBP1    | 0.53  |
| hsa-mir-223 | FBXO32  | 0.47  |
| hsa-mir-223 | FCER1A  | 0.39  |
| hsa-mir-223 | FCER1G  | 0.56  |
| hsa-mir-223 | FCGBP   | 0.54  |
| hsa-mir-223 | FCGR2A  | 0.56  |
| hsa-mir-223 | FCGR2B  | 0.56  |
| hsa-mir-223 | FCGR3A  | 0.47  |
| hsa-mir-223 | FCGRT   | 0.44  |
| hsa-mir-223 | FER1L3  | 0.57  |
| hsa-mir-223 | FES     | 0.55  |
| hsa-mir-223 | FGFBP3  | -0.42 |

|             |          |       |
|-------------|----------|-------|
| hsa-mir-223 | FGFR3    | -0.16 |
| hsa-mir-223 | FGL2     | 0.45  |
| hsa-mir-223 | FILIP1L  | 0.42  |
| hsa-mir-223 | FLI1     | 0.51  |
| hsa-mir-223 | FLJ20273 | 0.63  |
| hsa-mir-223 | FLJ21438 | 0.49  |
| hsa-mir-223 | FLJ22662 | 0.5   |
| hsa-mir-223 | FLT3     | 0.33  |
| hsa-mir-223 | FLVCR2   | 0.54  |
| hsa-mir-223 | FMO4     | 0.48  |
| hsa-mir-223 | FOSL2    | 0.52  |
| hsa-mir-223 | FPR1     | 0.47  |
| hsa-mir-223 | FPRL1    | 0.61  |
| hsa-mir-223 | FPRL2    | 0.51  |
| hsa-mir-223 | FUCA1    | 0.46  |
| hsa-mir-223 | FYB      | 0.53  |
| hsa-mir-223 | G0S2     | 0.39  |
| hsa-mir-223 | GAA      | 0.46  |
| hsa-mir-223 | GADD45B  | 0.42  |
| hsa-mir-223 | GBP5     | 0.48  |
| hsa-mir-223 | GCNT1    | 0.46  |
| hsa-mir-223 | GDAP1L1  | -0.39 |
| hsa-mir-223 | GEM      | 0.47  |
| hsa-mir-223 | GGTLA1   | 0.41  |
| hsa-mir-223 | GIMAP1   | 0.52  |
| hsa-mir-223 | GIMAP2   | 0.46  |
| hsa-mir-223 | GIMAP4   | 0.5   |
| hsa-mir-223 | GIMAP5   | 0.46  |
| hsa-mir-223 | GIMAP6   | 0.48  |
| hsa-mir-223 | GIMAP7   | 0.48  |
| hsa-mir-223 | GIMAP8   | 0.48  |
| hsa-mir-223 | GJA1     | 0.15  |
| hsa-mir-223 | GLT8D4   | 0.45  |
| hsa-mir-223 | GMFG     | 0.51  |
| hsa-mir-223 | GNGT2    | 0.48  |
| hsa-mir-223 | GNS      | 0.49  |
| hsa-mir-223 | GPR171   | 0.49  |
| hsa-mir-223 | GPR65    | 0.48  |
| hsa-mir-223 | GPR84    | 0.57  |
| hsa-mir-223 | GPR92    | 0.36  |
| hsa-mir-223 | GZMB     | 0.44  |
| hsa-mir-223 | GZMK     | 0.47  |
| hsa-mir-223 | HAMP     | 0.5   |
| hsa-mir-223 | HAVCR2   | 0.5   |
| hsa-mir-223 | HBEGF    | 0.48  |
| hsa-mir-223 | HCK      | 0.54  |
| hsa-mir-223 | HCLS1    | 0.55  |
| hsa-mir-223 | HCST     | 0.51  |
| hsa-mir-223 | HHEX     | 0.35  |
| hsa-mir-223 | HK3      | 0.54  |
| hsa-mir-223 | HLA-DMA  | 0.53  |
| hsa-mir-223 | HLA-DMB  | 0.42  |
| hsa-mir-223 | HLA-DOA  | 0.55  |

|             |          |       |
|-------------|----------|-------|
| hsa-mir-223 | HLA-DPA1 | 0.47  |
| hsa-mir-223 | HLA-DPB1 | 0.45  |
| hsa-mir-223 | HLA-DQB1 | 0.42  |
| hsa-mir-223 | HLA-DRA  | 0.48  |
| hsa-mir-223 | HLA-DRB5 | 0.41  |
| hsa-mir-223 | HMHA1    | 0.52  |
| hsa-mir-223 | HPS3     | 0.46  |
| hsa-mir-223 | HRH1     | 0.47  |
| hsa-mir-223 | HSPA6    | 0.51  |
| hsa-mir-223 | IBSP     | 0.45  |
| hsa-mir-223 | ICAM1    | 0.52  |
| hsa-mir-223 | IER3     | 0.52  |
| hsa-mir-223 | IFI16    | 0.45  |
| hsa-mir-223 | IFI30    | 0.49  |
| hsa-mir-223 | IFITM2   | 0.43  |
| hsa-mir-223 | IKZF1    | 0.47  |
| hsa-mir-223 | IL10     | 0.53  |
| hsa-mir-223 | IL10RA   | 0.57  |
| hsa-mir-223 | IL13RA1  | 0.58  |
| hsa-mir-223 | IL18     | 0.42  |
| hsa-mir-223 | IL18R1   | 0.46  |
| hsa-mir-223 | IL18RAP  | 0.47  |
| hsa-mir-223 | IL1A     | 0.45  |
| hsa-mir-223 | IL1B     | 0.5   |
| hsa-mir-223 | IL1R1    | 0.49  |
| hsa-mir-223 | IL1R2    | 0.5   |
| hsa-mir-223 | IL1RN    | 0.46  |
| hsa-mir-223 | IL21R    | 0.46  |
| hsa-mir-223 | IL2RA    | 0.58  |
| hsa-mir-223 | IL4R     | 0.55  |
| hsa-mir-223 | IL6      | 0.51  |
| hsa-mir-223 | IL7      | 0.39  |
| hsa-mir-223 | IL7R     | 0.57  |
| hsa-mir-223 | IL8      | 0.43  |
| hsa-mir-223 | IL8RB    | 0.46  |
| hsa-mir-223 | INCA     | 0.49  |
| hsa-mir-223 | IRAK3    | 0.59  |
| hsa-mir-223 | ITGAM    | 0.49  |
| hsa-mir-223 | ITGB2    | 0.51  |
| hsa-mir-223 | JUNB     | 0.52  |
| hsa-mir-223 | KCNE3    | 0.51  |
| hsa-mir-223 | KCNJ15   | 0.53  |
| hsa-mir-223 | KCNMB1   | 0.53  |
| hsa-mir-223 | KCNQ1    | 0.56  |
| hsa-mir-223 | KCTD12   | 0.51  |
| hsa-mir-223 | KIAA1274 | 0.35  |
| hsa-mir-223 | KIAA1949 | 0.53  |
| hsa-mir-223 | KLHL23   | -0.47 |
| hsa-mir-223 | KLRB1    | 0.5   |
| hsa-mir-223 | LAIR1    | 0.6   |
| hsa-mir-223 | LAMA2    | 0.46  |
| hsa-mir-223 | LAPTM5   | 0.55  |
| hsa-mir-223 | LCN2     | 0.35  |

|             |           |      |
|-------------|-----------|------|
| hsa-mir-223 | LCP1      | 0.55 |
| hsa-mir-223 | LCP2      | 0.55 |
| hsa-mir-223 | LCTL      | 0.46 |
| hsa-mir-223 | LEPREL1   | 0.39 |
| hsa-mir-223 | LGALS9    | 0.45 |
| hsa-mir-223 | LHFPL2    | 0.58 |
| hsa-mir-223 | LIF       | 0.48 |
| hsa-mir-223 | LILRA1    | 0.44 |
| hsa-mir-223 | LILRB1    | 0.49 |
| hsa-mir-223 | LILRB2    | 0.58 |
| hsa-mir-223 | LILRB3    | 0.63 |
| hsa-mir-223 | LOC221091 | 0.44 |
| hsa-mir-223 | LOC388335 | 0.38 |
| hsa-mir-223 | LOX       | 0.47 |
| hsa-mir-223 | LPXN      | 0.53 |
| hsa-mir-223 | LRP1      | 0.35 |
| hsa-mir-223 | LRRC25    | 0.61 |
| hsa-mir-223 | LST1      | 0.46 |
| hsa-mir-223 | LTB       | 0.46 |
| hsa-mir-223 | LTC4S     | 0.46 |
| hsa-mir-223 | LY75      | 0.5  |
| hsa-mir-223 | LY96      | 0.51 |
| hsa-mir-223 | LYVE1     | 0.45 |
| hsa-mir-223 | MAFB      | 0.57 |
| hsa-mir-223 | MAN1C1    | 0.39 |
| hsa-mir-223 | MAP3K8    | 0.62 |
| hsa-mir-223 | MARCO     | 0.54 |
| hsa-mir-223 | MERTK     | 0.43 |
| hsa-mir-223 | METRNL    | 0.48 |
| hsa-mir-223 | MFSD1     | 0.53 |
| hsa-mir-223 | MFSD7     | 0.49 |
| hsa-mir-223 | MGAT4A    | 0.46 |
| hsa-mir-223 | MICALCL   | 0.47 |
| hsa-mir-223 | MMP19     | 0.52 |
| hsa-mir-223 | MMP7      | 0.44 |
| hsa-mir-223 | MNDA      | 0.54 |
| hsa-mir-223 | MR1       | 0.5  |
| hsa-mir-223 | MS4A4A    | 0.49 |
| hsa-mir-223 | MS4A6A    | 0.56 |
| hsa-mir-223 | MS4A7     | 0.49 |
| hsa-mir-223 | MSR1      | 0.51 |
| hsa-mir-223 | MST150    | 0.48 |
| hsa-mir-223 | MT1B      | 0.47 |
| hsa-mir-223 | MT1H      | 0.45 |
| hsa-mir-223 | MVP       | 0.53 |
| hsa-mir-223 | MYBPH     | 0.43 |
| hsa-mir-223 | MYO1F     | 0.59 |
| hsa-mir-223 | NCF1      | 0.5  |
| hsa-mir-223 | NCF2      | 0.54 |
| hsa-mir-223 | NCKAP1L   | 0.46 |
| hsa-mir-223 | NDRG2     | -0.3 |
| hsa-mir-223 | NEURL2    | 0.44 |
| hsa-mir-223 | NFKBIZ    | 0.58 |



|             |          |       |
|-------------|----------|-------|
| hsa-mir-223 | NKG7     | 0.5   |
| hsa-mir-223 | NLRC4    | 0.53  |
| hsa-mir-223 | NLRP3    | 0.53  |
| hsa-mir-223 | NOD2     | 0.61  |
| hsa-mir-223 | NOTCH2NL | 0.42  |
| hsa-mir-223 | NPC2     | 0.54  |
| hsa-mir-223 | NTNG1    | 0.25  |
| hsa-mir-223 | NYD-SP21 | 0.48  |
| hsa-mir-223 | OBFC2A   | 0.45  |
| hsa-mir-223 | OGFRL1   | 0.47  |
| hsa-mir-223 | OLFML2B  | 0.54  |
| hsa-mir-223 | OSM      | 0.61  |
| hsa-mir-223 | P2RY5    | 0.38  |
| hsa-mir-223 | P2RY6    | 0.39  |
| hsa-mir-223 | P4HA3    | 0.44  |
| hsa-mir-223 | PALMD    | 0.42  |
| hsa-mir-223 | PARVG    | 0.55  |
| hsa-mir-223 | PBEF1    | 0.55  |
| hsa-mir-223 | PDZK1IP1 | 0.48  |
| hsa-mir-223 | PI3      | 0.56  |
| hsa-mir-223 | PIK3AP1  | 0.51  |
| hsa-mir-223 | PLA2G5   | 0.41  |
| hsa-mir-223 | PLB1     | 0.56  |
| hsa-mir-223 | PLCG2    | 0.53  |
| hsa-mir-223 | PLEK     | 0.52  |
| hsa-mir-223 | PLK3     | 0.53  |
| hsa-mir-223 | PLTP     | 0.56  |
| hsa-mir-223 | PLXDC2   | 0.52  |
| hsa-mir-223 | PMFBP1   | 0.48  |
| hsa-mir-223 | POLD4    | 0.56  |
| hsa-mir-223 | PPBP     | 0.46  |
| hsa-mir-223 | PRAM1    | 0.46  |
| hsa-mir-223 | PRF1     | 0.48  |
| hsa-mir-223 | PSAT1    | -0.36 |
| hsa-mir-223 | PSCD4    | 0.57  |
| hsa-mir-223 | PSCDBP   | 0.59  |
| hsa-mir-223 | PSTPIP1  | 0.38  |
| hsa-mir-223 | PTAFR    | 0.47  |
| hsa-mir-223 | PTGER4   | 0.53  |
| hsa-mir-223 | PTGS1    | 0.39  |
| hsa-mir-223 | PTGS2    | 0.44  |
| hsa-mir-223 | PTPLAD2  | 0.42  |
| hsa-mir-223 | PTPN2    | 0.52  |
| hsa-mir-223 | PTPRC    | 0.57  |
| hsa-mir-223 | PTX3     | 0.49  |
| hsa-mir-223 | PYCARD   | 0.5   |
| hsa-mir-223 | RAC2     | 0.49  |
| hsa-mir-223 | RARRES1  | 0.47  |
| hsa-mir-223 | RDH10    | 0.5   |
| hsa-mir-223 | RELB     | 0.47  |
| hsa-mir-223 | RETN     | 0.55  |
| hsa-mir-223 | RFTN1    | 0.39  |
| hsa-mir-223 | Rgr      | 0.49  |

|             |          |      |
|-------------|----------|------|
| hsa-mir-223 | RGS1     | 0.47 |
| hsa-mir-223 | RGS18    | 0.59 |
| hsa-mir-223 | RGS2     | 0.39 |
| hsa-mir-223 | RHOH     | 0.51 |
| hsa-mir-223 | RHOQ     | 0.36 |
| hsa-mir-223 | RIPK3    | 0.48 |
| hsa-mir-223 | RNASE2   | 0.6  |
| hsa-mir-223 | RNASE3   | 0.59 |
| hsa-mir-223 | RNASET2  | 0.41 |
| hsa-mir-223 | RNF130   | 0.41 |
| hsa-mir-223 | RNF144B  | 0.57 |
| hsa-mir-223 | RNF149   | 0.5  |
| hsa-mir-223 | RPGRIP1  | 0.49 |
| hsa-mir-223 | RRAS     | 0.47 |
| hsa-mir-223 | S100A11  | 0.55 |
| hsa-mir-223 | S100A12  | 0.47 |
| hsa-mir-223 | S100A8   | 0.59 |
| hsa-mir-223 | S100A9   | 0.55 |
| hsa-mir-223 | SAA1     | 0.51 |
| hsa-mir-223 | SAA2     | 0.51 |
| hsa-mir-223 | SAMHD1   | 0.29 |
| hsa-mir-223 | SAMSN1   | 0.45 |
| hsa-mir-223 | SAT1     | 0.57 |
| hsa-mir-223 | SCIN     | 0.51 |
| hsa-mir-223 | SCPEP1   | 0.46 |
| hsa-mir-223 | SELL     | 0.42 |
| hsa-mir-223 | SERPINB1 | 0.51 |
| hsa-mir-223 | SERPING1 | 0.48 |
| hsa-mir-223 | SH2B3    | 0.51 |
| hsa-mir-223 | SH3TC1   | 0.52 |
| hsa-mir-223 | SIGLEC10 | 0.54 |
| hsa-mir-223 | SIGLEC5  | 0.48 |
| hsa-mir-223 | SIGLEC7  | 0.52 |
| hsa-mir-223 | SIGLEC9  | 0.6  |
| hsa-mir-223 | SIPA1    | 0.47 |
| hsa-mir-223 | SLA      | 0.57 |
| hsa-mir-223 | SLAMF1   | 0.49 |
| hsa-mir-223 | SLAMF8   | 0.61 |
| hsa-mir-223 | SLC11A1  | 0.63 |
| hsa-mir-223 | SLC15A3  | 0.49 |
| hsa-mir-223 | SLC16A10 | 0.43 |
| hsa-mir-223 | SLC22A16 | 0.31 |
| hsa-mir-223 | SLC24A6  | 0.46 |
| hsa-mir-223 | SLC33A1  | 0.4  |
| hsa-mir-223 | SLC39A14 | 0.47 |
| hsa-mir-223 | SLC39A8  | 0.49 |
| hsa-mir-223 | SLC7A7   | 0.56 |
| hsa-mir-223 | SLC9A9   | 0.45 |
| hsa-mir-223 | SLCO2B1  | 0.53 |
| hsa-mir-223 | SLFN11   | 0.21 |
| hsa-mir-223 | SLPI     | 0.43 |
| hsa-mir-223 | SOCS3    | 0.55 |
| hsa-mir-223 | SOD2     | 0.59 |

|             |              |       |
|-------------|--------------|-------|
| hsa-mir-223 | SP140        | 0.53  |
| hsa-mir-223 | SPI1         | 0.55  |
| hsa-mir-223 | SPOCD1       | 0.51  |
| hsa-mir-223 | SPP1         | 0.41  |
| hsa-mir-223 | SQRDL        | 0.54  |
| hsa-mir-223 | SRGN         | 0.56  |
| hsa-mir-223 | SRPX2        | 0.49  |
| hsa-mir-223 | STAB1        | 0.59  |
| hsa-mir-223 | STEAP3       | 0.49  |
| hsa-mir-223 | STMN1        | -0.47 |
| hsa-mir-223 | STX11        | 0.47  |
| hsa-mir-223 | SUMF1        | 0.58  |
| hsa-mir-223 | SWAP70       | 0.42  |
| hsa-mir-223 | SYK          | 0.54  |
| hsa-mir-223 | SYTL3        | 0.57  |
| hsa-mir-223 | TAGAP        | 0.42  |
| hsa-mir-223 | TBC1D10C     | 0.5   |
| hsa-mir-223 | TBXAS1       | 0.52  |
| hsa-mir-223 | tcag7.1314   | 0.47  |
| hsa-mir-223 | TCIRG1       | 0.55  |
| hsa-mir-223 | TFEC         | 0.45  |
| hsa-mir-223 | TGFBR2       | 0.55  |
| hsa-mir-223 | THBD         | 0.59  |
| hsa-mir-223 | TIMP1        | 0.53  |
| hsa-mir-223 | TLR1         | 0.53  |
| hsa-mir-223 | TLR2         | 0.57  |
| hsa-mir-223 | TLR3         | 0.34  |
| hsa-mir-223 | TLR5         | 0.56  |
| hsa-mir-223 | TLR6         | 0.53  |
| hsa-mir-223 | TLR7         | 0.45  |
| hsa-mir-223 | TLR8         | 0.48  |
| hsa-mir-223 | TMEFF1       | -0.43 |
| hsa-mir-223 | TMEM154      | 0.42  |
| hsa-mir-223 | TMEM173      | 0.53  |
| hsa-mir-223 | TMEM176B     | 0.5   |
| hsa-mir-223 | TMEM71       | 0.46  |
| hsa-mir-223 | TNFAIP2      | 0.44  |
| hsa-mir-223 | TNFAIP3      | 0.63  |
| hsa-mir-223 | TNFAIP8      | 0.49  |
| hsa-mir-223 | TNFAIP8L2    | 0.51  |
| hsa-mir-223 | TNFRSF10C    | 0.55  |
| hsa-mir-223 | TNFRSF1B     | 0.51  |
| hsa-mir-223 | TPP1         | 0.51  |
| hsa-mir-223 | TRAF3IP3     | 0.52  |
| hsa-mir-223 | TREM1        | 0.58  |
| hsa-mir-223 | TRIM38       | 0.52  |
| hsa-mir-223 | TRIM6-TRIM34 | 0.49  |
| hsa-mir-223 | UPP1         | 0.48  |
| hsa-mir-223 | URP2         | 0.51  |
| hsa-mir-223 | VAMP8        | 0.53  |
| hsa-mir-223 | VAV1         | 0.52  |
| hsa-mir-223 | VDR          | 0.58  |
| hsa-mir-223 | VMO1         | 0.49  |

|             |           |       |
|-------------|-----------|-------|
| hsa-mir-223 | VNN2      | 0.56  |
| hsa-mir-223 | VSTM3     | 0.45  |
| hsa-mir-223 | WDFY4     | 0.55  |
| hsa-mir-223 | WIPF1     | 0.55  |
| hsa-mir-223 | ZC3H12A   | 0.54  |
| hsa-mir-223 | ZCCHC6    | 0.52  |
| hsa-mir-223 | ZFP36     | 0.49  |
| hsa-mir-223 | ZMYND15   | 0.48  |
| hsa-mir-223 | ZNRF2     | 0.38  |
| hsa-mir-223 | ZSCAN18   | -0.22 |
| hsa-mir-224 | ABCC2     | -0.31 |
| hsa-mir-224 | ABCG5     | -0.35 |
| hsa-mir-224 | ACTBL1    | -0.34 |
| hsa-mir-224 | ACTL8     | -0.36 |
| hsa-mir-224 | ADCY4     | 0.36  |
| hsa-mir-224 | ALB       | -0.34 |
| hsa-mir-224 | AMHR2     | -0.38 |
| hsa-mir-224 | AMPD1     | -0.28 |
| hsa-mir-224 | APOA5     | -0.35 |
| hsa-mir-224 | ART4      | -0.4  |
| hsa-mir-224 | BAAT      | -0.42 |
| hsa-mir-224 | BSND      | -0.3  |
| hsa-mir-224 | C14orf115 | -0.35 |
| hsa-mir-224 | C16orf73  | -0.38 |
| hsa-mir-224 | C18orf2   | -0.38 |
| hsa-mir-224 | C2orf48   | -0.35 |
| hsa-mir-224 | C5orf29   | 0.34  |
| hsa-mir-224 | C6orf123  | 0.37  |
| hsa-mir-224 | C8A       | -0.36 |
| hsa-mir-224 | C8B       | -0.35 |
| hsa-mir-224 | CAPN6     | -0.27 |
| hsa-mir-224 | CASP12    | 0.28  |
| hsa-mir-224 | CD34      | 0.45  |
| hsa-mir-224 | CD93      | 0.37  |
| hsa-mir-224 | CDH16     | -0.36 |
| hsa-mir-224 | CDH5      | 0.37  |
| hsa-mir-224 | CEACAM1   | -0.28 |
| hsa-mir-224 | CEACAM5   | -0.36 |
| hsa-mir-224 | CEACAM6   | -0.34 |
| hsa-mir-224 | CLCA2     | -0.4  |
| hsa-mir-224 | CLDN6     | -0.33 |
| hsa-mir-224 | CPB2      | -0.32 |
| hsa-mir-224 | CREB3L3   | -0.36 |
| hsa-mir-224 | CRYBA1    | -0.08 |
| hsa-mir-224 | DSCR8     | -0.3  |
| hsa-mir-224 | ECEL1     | -0.14 |
| hsa-mir-224 | ELA3A     | -0.3  |
| hsa-mir-224 | ELTD1     | 0.36  |
| hsa-mir-224 | EPGN      | -0.37 |
| hsa-mir-224 | ESX1      | -0.36 |
| hsa-mir-224 | FAIM3     | -0.2  |
| hsa-mir-224 | FAM83A    | -0.38 |
| hsa-mir-224 | FAM83B    | -0.37 |

|             |           |       |
|-------------|-----------|-------|
| hsa-mir-224 | FAM9B     | -0.38 |
| hsa-mir-224 | FBXL21    | -0.4  |
| hsa-mir-224 | FGA       | -0.33 |
| hsa-mir-224 | FGB       | -0.33 |
| hsa-mir-224 | FGF23     | -0.33 |
| hsa-mir-224 | FHL5      | 0.37  |
| hsa-mir-224 | FLJ35880  | -0.25 |
| hsa-mir-224 | FLJ46111  | -0.29 |
| hsa-mir-224 | FTCD      | -0.37 |
| hsa-mir-224 | GABRE     | 0.35  |
| hsa-mir-224 | GJA4      | 0.37  |
| hsa-mir-224 | GJB1      | -0.34 |
| hsa-mir-224 | GLRA3     | -0.34 |
| hsa-mir-224 | GPR116    | 0.31  |
| hsa-mir-224 | GPR34     | 0.27  |
| hsa-mir-224 | GPR4      | 0.37  |
| hsa-mir-224 | GSTA3     | -0.31 |
| hsa-mir-224 | GSTA5     | -0.29 |
| hsa-mir-224 | GYPB      | -0.41 |
| hsa-mir-224 | HAND1     | -0.39 |
| hsa-mir-224 | HBG2      | -0.29 |
| hsa-mir-224 | HEMGN     | -0.26 |
| hsa-mir-224 | HFE2      | -0.33 |
| hsa-mir-224 | HPN       | -0.36 |
| hsa-mir-224 | IGF2BP1   | -0.28 |
| hsa-mir-224 | IGLV2-14  | -0.35 |
| hsa-mir-224 | IL23R     | -0.41 |
| hsa-mir-224 | INSL4     | -0.32 |
| hsa-mir-224 | INSL5     | 0.4   |
| hsa-mir-224 | ISL1      | -0.3  |
| hsa-mir-224 | KDR       | 0.37  |
| hsa-mir-224 | KIAA1822L | -0.05 |
| hsa-mir-224 | KRT12     | -0.31 |
| hsa-mir-224 | KRT16     | -0.25 |
| hsa-mir-224 | KRT33A    | -0.36 |
| hsa-mir-224 | KRT37     | -0.41 |
| hsa-mir-224 | KRT6C     | -0.36 |
| hsa-mir-224 | KRT86     | -0.4  |
| hsa-mir-224 | KRTAP1-5  | -0.34 |
| hsa-mir-224 | KRTAP3-1  | -0.35 |
| hsa-mir-224 | LAMA2     | 0.4   |
| hsa-mir-224 | LCT       | -0.37 |
| hsa-mir-224 | LDLRAD1   | -0.36 |
| hsa-mir-224 | LHFPL3    | -0.05 |
| hsa-mir-224 | LIN28B    | -0.29 |
| hsa-mir-224 | LOC441601 | -0.39 |
| hsa-mir-224 | MAGEA1    | -0.22 |
| hsa-mir-224 | MAGEA4    | -0.29 |
| hsa-mir-224 | MAGEA8    | -0.39 |
| hsa-mir-224 | MAGEA9    | -0.28 |
| hsa-mir-224 | MAGEB6    | -0.33 |
| hsa-mir-224 | MAGEC1    | -0.37 |
| hsa-mir-224 | MAGEC2    | -0.27 |

|             |             |       |
|-------------|-------------|-------|
| hsa-mir-224 | MBL2        | -0.34 |
| hsa-mir-224 | MIA2        | -0.3  |
| hsa-mir-224 | MME         | -0.12 |
| hsa-mir-224 | MMRN1       | 0.39  |
| hsa-mir-224 | MS4A1       | -0.34 |
| hsa-mir-224 | MS4A3       | -0.37 |
| hsa-mir-224 | MSMB        | -0.37 |
| hsa-mir-224 | MSX2        | -0.25 |
| hsa-mir-224 | MTMR8       | -0.37 |
| hsa-mir-224 | MUC15       | -0.27 |
| hsa-mir-224 | MYH2        | -0.32 |
| hsa-mir-224 | MYL1        | -0.26 |
| hsa-mir-224 | MYL7        | -0.38 |
| hsa-mir-224 | MYLC2PL     | -0.32 |
| hsa-mir-224 | MYPN        | -0.32 |
| hsa-mir-224 | NANOGP1     | -0.3  |
| hsa-mir-224 | NRG4        | -0.45 |
| hsa-mir-224 | ODAM        | -0.27 |
| hsa-mir-224 | OR1D2       | -0.45 |
| hsa-mir-224 | OR51B5      | -0.36 |
| hsa-mir-224 | OR51I1      | -0.34 |
| hsa-mir-224 | PAEP        | -0.28 |
| hsa-mir-224 | PAGE1       | -0.32 |
| hsa-mir-224 | PAX9        | -0.29 |
| hsa-mir-224 | PLA2G3      | -0.31 |
| hsa-mir-224 | PLXDC1      | 0.39  |
| hsa-mir-224 | PNLIPRP2    | -0.36 |
| hsa-mir-224 | PRAP1       | -0.37 |
| hsa-mir-224 | PRDM7       | -0.36 |
| hsa-mir-224 | PRODH2      | -0.34 |
| hsa-mir-224 | PRSS1       | -0.39 |
| hsa-mir-224 | PRSS2       | -0.38 |
| hsa-mir-224 | PRSS3       | -0.34 |
| hsa-mir-224 | PTGFR       | -0.31 |
| hsa-mir-224 | RNF152      | 0.34  |
| hsa-mir-224 | RNF212      | -0.37 |
| hsa-mir-224 | RP13-36C9.6 | -0.24 |
| hsa-mir-224 | RPS6KA6     | -0.24 |
| hsa-mir-224 | RTP3        | 0.04  |
| hsa-mir-224 | S100A2      | 0.39  |
| hsa-mir-224 | SERPINA10   | -0.3  |
| hsa-mir-224 | SERPINA11   | -0.31 |
| hsa-mir-224 | SERPINA4    | -0.38 |
| hsa-mir-224 | SERPINA6    | -0.33 |
| hsa-mir-224 | SERPINA7    | -0.32 |
| hsa-mir-224 | SERPINB2    | -0.34 |
| hsa-mir-224 | SERPINB3    | -0.37 |
| hsa-mir-224 | SERPINB4    | -0.37 |
| hsa-mir-224 | SERPINB5    | -0.39 |
| hsa-mir-224 | SLC12A3     | -0.35 |
| hsa-mir-224 | SLC17A2     | -0.42 |
| hsa-mir-224 | SLC25A21    | -0.38 |
| hsa-mir-224 | SLC44A4     | -0.37 |

|             |          |       |
|-------------|----------|-------|
| hsa-mir-224 | SLC45A2  | -0.42 |
| hsa-mir-224 | SLC6A4   | -0.38 |
| hsa-mir-224 | SMCR5    | -0.34 |
| hsa-mir-224 | SPINK5   | -0.35 |
| hsa-mir-224 | SPRR1B   | -0.47 |
| hsa-mir-224 | SPRR3    | -0.25 |
| hsa-mir-224 | SSX1     | -0.41 |
| hsa-mir-224 | SULT1C4  | 0.37  |
| hsa-mir-224 | SULT2A1  | -0.37 |
| hsa-mir-224 | TDGF1    | -0.29 |
| hsa-mir-224 | TMEM16J  | -0.36 |
| hsa-mir-224 | TNFRSF4  | 0.38  |
| hsa-mir-224 | TP53TG3  | -0.29 |
| hsa-mir-224 | TRIM15   | -0.3  |
| hsa-mir-224 | TRIM49   | -0.3  |
| hsa-mir-224 | TRPA1    | -0.32 |
| hsa-mir-224 | TRPM1    | -0.44 |
| hsa-mir-224 | TSPY2    | -0.39 |
| hsa-mir-224 | TUBA3C   | -0.26 |
| hsa-mir-224 | UGT2B28  | -0.4  |
| hsa-mir-224 | UGT2B4   | -0.36 |
| hsa-mir-224 | UNC93A   | -0.4  |
| hsa-mir-224 | VIL1     | -0.36 |
| hsa-mir-224 | ZNF366   | 0.36  |
| hsa-mir-224 | ZNF556   | -0.03 |
| hsa-mir-23a | ABCC3    | 0.54  |
| hsa-mir-23a | ACTL6B   | -0.6  |
| hsa-mir-23a | ALS2CR13 | -0.59 |
| hsa-mir-23a | ANKRD13B | -0.44 |
| hsa-mir-23a | ANKRD25  | 0.53  |
| hsa-mir-23a | ANXA1    | 0.71  |
| hsa-mir-23a | ANXA2    | 0.61  |
| hsa-mir-23a | ANXA5    | 0.56  |
| hsa-mir-23a | ARHGEF7  | -0.61 |
| hsa-mir-23a | ARSJ     | 0.53  |
| hsa-mir-23a | ASRGL1   | -0.49 |
| hsa-mir-23a | ATRNL1   | -0.57 |
| hsa-mir-23a | B2M      | 0.41  |
| hsa-mir-23a | B3GALT2  | -0.45 |
| hsa-mir-23a | BASP1    | -0.56 |
| hsa-mir-23a | BCL11A   | -0.55 |
| hsa-mir-23a | BCL11B   | -0.54 |
| hsa-mir-23a | BCL2L12  | 0.52  |
| hsa-mir-23a | BEX2     | -0.6  |
| hsa-mir-23a | BHLHB5   | -0.53 |
| hsa-mir-23a | BRSK2    | -0.64 |
| hsa-mir-23a | BSN      | -0.59 |
| hsa-mir-23a | C2orf12  | 0.48  |
| hsa-mir-23a | C6orf154 | -0.37 |
| hsa-mir-23a | C6orf168 | -0.52 |
| hsa-mir-23a | C8orf4   | 0.47  |
| hsa-mir-23a | CABP1    | -0.59 |
| hsa-mir-23a | CACNA2D2 | -0.48 |

|             |          |       |
|-------------|----------|-------|
| hsa-mir-23a | CAMKV    | -0.66 |
| hsa-mir-23a | CAPN2    | 0.58  |
| hsa-mir-23a | CAST     | 0.6   |
| hsa-mir-23a | CBLN1    | -0.53 |
| hsa-mir-23a | CCDC102A | 0.48  |
| hsa-mir-23a | CD200    | -0.6  |
| hsa-mir-23a | CD44     | 0.6   |
| hsa-mir-23a | CD58     | 0.51  |
| hsa-mir-23a | CD63     | 0.56  |
| hsa-mir-23a | CD97     | 0.52  |
| hsa-mir-23a | CDK5R1   | -0.64 |
| hsa-mir-23a | CECR6    | -0.51 |
| hsa-mir-23a | CFI      | 0.51  |
| hsa-mir-23a | CHCHD6   | -0.49 |
| hsa-mir-23a | CKMT1A   | -0.6  |
| hsa-mir-23a | CNTNAP5  | -0.49 |
| hsa-mir-23a | COL5A2   | 0.48  |
| hsa-mir-23a | CPLX2    | -0.57 |
| hsa-mir-23a | CRHBP    | -0.41 |
| hsa-mir-23a | CRTAC1   | -0.55 |
| hsa-mir-23a | CSDA     | 0.51  |
| hsa-mir-23a | CSRP2    | 0.48  |
| hsa-mir-23a | CUTL2    | -0.63 |
| hsa-mir-23a | DACH2    | -0.56 |
| hsa-mir-23a | DDX25    | -0.48 |
| hsa-mir-23a | DGKI     | -0.49 |
| hsa-mir-23a | DLEU7    | -0.49 |
| hsa-mir-23a | DOK6     | -0.55 |
| hsa-mir-23a | DPY19L1  | 0.43  |
| hsa-mir-23a | DRAM     | 0.54  |
| hsa-mir-23a | DRD5     | -0.55 |
| hsa-mir-23a | DSCAML1  | -0.52 |
| hsa-mir-23a | DUSP26   | -0.53 |
| hsa-mir-23a | DUSP8    | -0.58 |
| hsa-mir-23a | EFEMP1   | 0.42  |
| hsa-mir-23a | ELAVL4   | -0.48 |
| hsa-mir-23a | EMP1     | 0.63  |
| hsa-mir-23a | EMP3     | 0.59  |
| hsa-mir-23a | EPHA10   | -0.6  |
| hsa-mir-23a | EVL      | -0.61 |
| hsa-mir-23a | FABP6    | -0.57 |
| hsa-mir-23a | FAM133A  | -0.42 |
| hsa-mir-23a | FAM19A5  | -0.5  |
| hsa-mir-23a | FAM57B   | -0.59 |
| hsa-mir-23a | FAM77C   | -0.56 |
| hsa-mir-23a | FBXL16   | -0.58 |
| hsa-mir-23a | FCGBP    | 0.51  |
| hsa-mir-23a | FER1L3   | 0.61  |
| hsa-mir-23a | FEZF2    | -0.5  |
| hsa-mir-23a | FGF13    | -0.47 |
| hsa-mir-23a | FGF9     | -0.55 |
| hsa-mir-23a | FLJ21963 | 0.53  |
| hsa-mir-23a | FLJ33790 | -0.52 |



|             |           |       |
|-------------|-----------|-------|
| hsa-mir-23a | FNDC3B    | 0.58  |
| hsa-mir-23a | FNDC5     | -0.52 |
| hsa-mir-23a | FUT9      | -0.51 |
| hsa-mir-23a | FZD7      | 0.51  |
| hsa-mir-23a | GABRB3    | -0.56 |
| hsa-mir-23a | GADD45A   | 0.5   |
| hsa-mir-23a | GAL3ST1   | -0.5  |
| hsa-mir-23a | GBP2      | 0.55  |
| hsa-mir-23a | GDAP1L1   | -0.51 |
| hsa-mir-23a | GDF15     | 0.51  |
| hsa-mir-23a | GPR155    | -0.32 |
| hsa-mir-23a | GPR177    | 0.46  |
| hsa-mir-23a | GPRIN1    | -0.47 |
| hsa-mir-23a | HDGFRP3   | -0.5  |
| hsa-mir-23a | HECW1     | -0.6  |
| hsa-mir-23a | HS3ST3A1  | 0.4   |
| hsa-mir-23a | INA       | -0.61 |
| hsa-mir-23a | INSM2     | -0.53 |
| hsa-mir-23a | JAKMIP1   | -0.57 |
| hsa-mir-23a | JPH3      | -0.59 |
| hsa-mir-23a | KCNA5     | -0.46 |
| hsa-mir-23a | KCNB2     | -0.62 |
| hsa-mir-23a | KCNMB2    | -0.38 |
| hsa-mir-23a | KIAA0984  | -0.41 |
| hsa-mir-23a | KIAA1244  | -0.51 |
| hsa-mir-23a | KIF1A     | -0.51 |
| hsa-mir-23a | KIF21B    | -0.57 |
| hsa-mir-23a | LGALS3    | 0.53  |
| hsa-mir-23a | LINGO1    | -0.57 |
| hsa-mir-23a | LMNA      | 0.55  |
| hsa-mir-23a | LOC493869 | 0.55  |
| hsa-mir-23a | LOC55565  | -0.49 |
| hsa-mir-23a | LRFN2     | -0.57 |
| hsa-mir-23a | LRRTM1    | -0.4  |
| hsa-mir-23a | LRTM2     | -0.56 |
| hsa-mir-23a | M6PRBP1   | 0.51  |
| hsa-mir-23a | MACROD2   | -0.47 |
| hsa-mir-23a | MAGI1     | -0.56 |
| hsa-mir-23a | MAST1     | -0.64 |
| hsa-mir-23a | MMAA      | 0.57  |
| hsa-mir-23a | MMP14     | 0.54  |
| hsa-mir-23a | MRCL3     | 0.49  |
| hsa-mir-23a | MYT1L     | -0.61 |
| hsa-mir-23a | NEDD4L    | -0.4  |
| hsa-mir-23a | NEFM      | -0.44 |
| hsa-mir-23a | NEK6      | 0.51  |
| hsa-mir-23a | NLGN2     | -0.4  |
| hsa-mir-23a | NPM2      | -0.63 |
| hsa-mir-23a | NRP2      | 0.49  |
| hsa-mir-23a | OLA1      | -0.48 |
| hsa-mir-23a | OPCML     | -0.5  |
| hsa-mir-23a | PAK3      | -0.56 |
| hsa-mir-23a | PAK7      | -0.62 |

|             |              |       |
|-------------|--------------|-------|
| hsa-mir-23a | PCDH11Y      | -0.55 |
| hsa-mir-23a | PCDH21       | -0.55 |
| hsa-mir-23a | PFN2         | -0.51 |
| hsa-mir-23a | PLAU         | 0.5   |
| hsa-mir-23a | PLEKHA4      | 0.49  |
| hsa-mir-23a | PLP1         | -0.43 |
| hsa-mir-23a | PLP2         | 0.57  |
| hsa-mir-23a | PRKCE        | -0.6  |
| hsa-mir-23a | PROS1        | 0.6   |
| hsa-mir-23a | PTH2R        | -0.47 |
| hsa-mir-23a | PTRF         | 0.56  |
| hsa-mir-23a | RAB11FIP4    | -0.61 |
| hsa-mir-23a | RAB33A       | -0.56 |
| hsa-mir-23a | RAB3A        | -0.62 |
| hsa-mir-23a | RAB3C        | -0.48 |
| hsa-mir-23a | RANBP6       | -0.31 |
| hsa-mir-23a | RBMS1        | 0.5   |
| hsa-mir-23a | REEP1        | -0.57 |
| hsa-mir-23a | REXO2        | 0.51  |
| hsa-mir-23a | RIMS1        | -0.51 |
| hsa-mir-23a | RIMS2        | -0.58 |
| hsa-mir-23a | RIMS3        | -0.64 |
| hsa-mir-23a | RNF165       | -0.55 |
| hsa-mir-23a | RP11-35N6.1  | -0.51 |
| hsa-mir-23a | RP11-679B17. | -0.58 |
| hsa-mir-23a | RPS6KA5      | -0.58 |
| hsa-mir-23a | RTN4R        | -0.54 |
| hsa-mir-23a | RUFY2        | -0.5  |
| hsa-mir-23a | RUNDC3A      | -0.62 |
| hsa-mir-23a | RUNX1        | 0.46  |
| hsa-mir-23a | S100A10      | 0.55  |
| hsa-mir-23a | S100A3       | 0.42  |
| hsa-mir-23a | S100A6       | 0.56  |
| hsa-mir-23a | SAMD9L       | 0.49  |
| hsa-mir-23a | SATB1        | -0.57 |
| hsa-mir-23a | SCN2A        | -0.49 |
| hsa-mir-23a | SDSL         | 0.41  |
| hsa-mir-23a | SERTAD1      | 0.47  |
| hsa-mir-23a | SFRP4        | 0.43  |
| hsa-mir-23a | SH3GL2       | -0.54 |
| hsa-mir-23a | SH3GL3       | -0.61 |
| hsa-mir-23a | SHANK2       | -0.61 |
| hsa-mir-23a | SHD          | -0.41 |
| hsa-mir-23a | SLC12A4      | 0.47  |
| hsa-mir-23a | SLC17A8      | -0.38 |
| hsa-mir-23a | SLC35D1      | 0.59  |
| hsa-mir-23a | SLC35D2      | 0.48  |
| hsa-mir-23a | SLC8A3       | -0.48 |
| hsa-mir-23a | SLITRK1      | -0.56 |
| hsa-mir-23a | SMOC1        | -0.42 |
| hsa-mir-23a | SNAP91       | -0.59 |
| hsa-mir-23a | SNIP         | -0.64 |
| hsa-mir-23a | SPARC        | 0.55  |

|             |           |       |
|-------------|-----------|-------|
| hsa-mir-23a | SPATA6    | 0.45  |
| hsa-mir-23a | SPOCD1    | 0.49  |
| hsa-mir-23a | SPTBN2    | -0.56 |
| hsa-mir-23a | SRPX2     | 0.61  |
| hsa-mir-23a | SRrp35    | -0.49 |
| hsa-mir-23a | SSTR1     | -0.55 |
| hsa-mir-23a | STK17A    | 0.51  |
| hsa-mir-23a | STMN1     | -0.53 |
| hsa-mir-23a | STX1B     | -0.53 |
| hsa-mir-23a | STXBP1    | -0.62 |
| hsa-mir-23a | STXBP5L   | -0.48 |
| hsa-mir-23a | SUSD4     | -0.43 |
| hsa-mir-23a | SYT13     | -0.56 |
| hsa-mir-23a | TAGLN     | 0.34  |
| hsa-mir-23a | TAGLN2    | 0.5   |
| hsa-mir-23a | TDRKH     | -0.5  |
| hsa-mir-23a | TIGD3     | -0.49 |
| hsa-mir-23a | TMCC2     | -0.6  |
| hsa-mir-23a | TMEFF1    | -0.56 |
| hsa-mir-23a | TMEM154   | 0.52  |
| hsa-mir-23a | TMEM16F   | 0.55  |
| hsa-mir-23a | TMEM28    | -0.46 |
| hsa-mir-23a | TMEM71    | 0.45  |
| hsa-mir-23a | TMSL8     | -0.23 |
| hsa-mir-23a | TNC       | 0.54  |
| hsa-mir-23a | TNFRSF12A | 0.59  |
| hsa-mir-23a | TNFRSF1A  | 0.57  |
| hsa-mir-23a | TNRC4     | -0.61 |
| hsa-mir-23a | TOP2A     | 0.01  |
| hsa-mir-23a | TRIP10    | 0.42  |
| hsa-mir-23a | TRIP6     | 0.52  |
| hsa-mir-23a | TSPYL4    | -0.57 |
| hsa-mir-23a | TTC9B     | -0.52 |
| hsa-mir-23a | TUB       | -0.54 |
| hsa-mir-23a | UGT8      | -0.46 |
| hsa-mir-23a | VIM       | 0.59  |
| hsa-mir-23a | WASF1     | -0.65 |
| hsa-mir-23a | WWTR1     | 0.56  |
| hsa-mir-23a | ZFP36L2   | 0.42  |
| hsa-mir-23a | ZNF488    | -0.48 |
| hsa-mir-23b | A2BP1     | 0.19  |
| hsa-mir-23b | BAI3      | 0.16  |
| hsa-mir-23b | C9orf3    | 0.54  |
| hsa-mir-23b | CCNA1     | 0.26  |
| hsa-mir-23b | CNTN1     | 0.3   |
| hsa-mir-23b | CRLF1     | 0.21  |
| hsa-mir-23b | D4S234E   | 0.37  |
| hsa-mir-23b | EDIL3     | 0.28  |
| hsa-mir-23b | FA2H      | 0.28  |
| hsa-mir-23b | FGF12     | 0.26  |
| hsa-mir-23b | FRMD5     | 0.37  |
| hsa-mir-23b | GAS2      | 0.06  |
| hsa-mir-23b | GRIK2     | 0.35  |

|             |           |       |
|-------------|-----------|-------|
| hsa-mir-23b | IL1RAPL1  | 0.31  |
| hsa-mir-23b | JAKMIP1   | 0.27  |
| hsa-mir-23b | KCNK1     | 0.21  |
| hsa-mir-23b | LNX1      | 0.28  |
| hsa-mir-23b | MBP       | 0.29  |
| hsa-mir-23b | NXPH1     | 0.26  |
| hsa-mir-23b | ODZ2      | 0.03  |
| hsa-mir-23b | PRSS35    | 0.32  |
| hsa-mir-23b | PTPRO     | 0.23  |
| hsa-mir-23b | SEMA3E    | 0.17  |
| hsa-mir-23b | SUPT3H    | 0.21  |
| hsa-mir-23b | SUSD5     | 0.24  |
| hsa-mir-23b | SYT13     | 0.2   |
| hsa-mir-23b | TMEFF2    | 0.27  |
| hsa-mir-23b | TMEM163   | 0.29  |
| hsa-mir-23b | TMEM16C   | 0.29  |
| hsa-mir-24  | ANXA1     | 0.52  |
| hsa-mir-24  | ANXA2     | 0.51  |
| hsa-mir-24  | APOB48R   | 0.34  |
| hsa-mir-24  | C16orf45  | -0.31 |
| hsa-mir-24  | CALU      | 0.43  |
| hsa-mir-24  | CAST      | 0.55  |
| hsa-mir-24  | CD44      | 0.48  |
| hsa-mir-24  | CDH10     | -0.44 |
| hsa-mir-24  | DTX1      | -0.39 |
| hsa-mir-24  | DYRK3     | 0.42  |
| hsa-mir-24  | FAM114A1  | 0.49  |
| hsa-mir-24  | FAM129A   | 0.45  |
| hsa-mir-24  | FBXO32    | 0.48  |
| hsa-mir-24  | FER1L3    | 0.51  |
| hsa-mir-24  | FSTL1     | 0.38  |
| hsa-mir-24  | GBP2      | 0.44  |
| hsa-mir-24  | GDAP1L1   | -0.44 |
| hsa-mir-24  | GEM       | 0.41  |
| hsa-mir-24  | GRIA2     | -0.36 |
| hsa-mir-24  | HSPA6     | 0.4   |
| hsa-mir-24  | IQGAP1    | 0.51  |
| hsa-mir-24  | ISG20     | 0.42  |
| hsa-mir-24  | KHDRBS2   | -0.4  |
| hsa-mir-24  | LOC493869 | 0.46  |
| hsa-mir-24  | MSN       | 0.46  |
| hsa-mir-24  | NLGN3     | -0.28 |
| hsa-mir-24  | NUDT10    | -0.27 |
| hsa-mir-24  | PAK7      | -0.38 |
| hsa-mir-24  | PLP2      | 0.48  |
| hsa-mir-24  | S100A10   | 0.46  |
| hsa-mir-24  | S100A6    | 0.48  |
| hsa-mir-24  | SLC24A5   | -0.51 |
| hsa-mir-24  | SOD2      | 0.4   |
| hsa-mir-24  | SRPX2     | 0.49  |
| hsa-mir-24  | TAGLN     | 0.35  |
| hsa-mir-24  | TMEM16F   | 0.4   |
| hsa-mir-24  | TNC       | 0.43  |

|            |             |       |
|------------|-------------|-------|
| hsa-mir-24 | TPM4        | 0.46  |
| hsa-mir-24 | WWTR1       | 0.49  |
| hsa-mir-25 | ACOT4       | -0.46 |
| hsa-mir-25 | ADRB2       | -0.43 |
| hsa-mir-25 | AIFM3       | -0.53 |
| hsa-mir-25 | ARRB1       | -0.42 |
| hsa-mir-25 | ASPM        | 0.61  |
| hsa-mir-25 | ATAD5       | 0.54  |
| hsa-mir-25 | ATF7IP2     | -0.49 |
| hsa-mir-25 | BHLHB3      | -0.36 |
| hsa-mir-25 | BIN1        | -0.51 |
| hsa-mir-25 | BIRC5       | 0.46  |
| hsa-mir-25 | BLNK        | -0.31 |
| hsa-mir-25 | BUB1        | 0.58  |
| hsa-mir-25 | C11orf82    | 0.5   |
| hsa-mir-25 | C13orf3     | 0.53  |
| hsa-mir-25 | CCDC77      | 0.48  |
| hsa-mir-25 | CCNA2       | 0.49  |
| hsa-mir-25 | CCNB2       | 0.56  |
| hsa-mir-25 | CDC25C      | 0.5   |
| hsa-mir-25 | CDC45L      | 0.56  |
| hsa-mir-25 | CDCA7       | 0.53  |
| hsa-mir-25 | CDCA8       | 0.56  |
| hsa-mir-25 | CENPA       | 0.57  |
| hsa-mir-25 | CENPE       | 0.52  |
| hsa-mir-25 | CENPF       | 0.61  |
| hsa-mir-25 | CENPH       | 0.52  |
| hsa-mir-25 | CENPK       | 0.5   |
| hsa-mir-25 | CHEK1       | 0.57  |
| hsa-mir-25 | CHTF18      | 0.43  |
| hsa-mir-25 | CKAP2L      | 0.57  |
| hsa-mir-25 | CKS2        | 0.47  |
| hsa-mir-25 | CPEB1       | -0.44 |
| hsa-mir-25 | CSRP1       | -0.5  |
| hsa-mir-25 | CYFIP2      | -0.39 |
| hsa-mir-25 | DBF4        | 0.52  |
| hsa-mir-25 | DBNDD2      | -0.45 |
| hsa-mir-25 | KFZp762E131 | 0.58  |
| hsa-mir-25 | DLG7        | 0.53  |
| hsa-mir-25 | DTL         | 0.54  |
| hsa-mir-25 | DUSP8       | -0.24 |
| hsa-mir-25 | E2F2        | 0.5   |
| hsa-mir-25 | E2F8        | 0.57  |
| hsa-mir-25 | ESCO2       | 0.52  |
| hsa-mir-25 | EVI2A       | -0.47 |
| hsa-mir-25 | EXO1        | 0.49  |
| hsa-mir-25 | EZH2        | 0.61  |
| hsa-mir-25 | FAM64A      | 0.57  |
| hsa-mir-25 | FAM79A      | -0.56 |
| hsa-mir-25 | FANCC       | 0.61  |
| hsa-mir-25 | FANCI       | 0.57  |
| hsa-mir-25 | FMNL1       | -0.46 |
| hsa-mir-25 | FOLH1       | -0.42 |

|            |           |       |
|------------|-----------|-------|
| hsa-mir-25 | FOXM1     | 0.55  |
| hsa-mir-25 | GINS2     | 0.5   |
| hsa-mir-25 | GINS3     | 0.52  |
| hsa-mir-25 | GJB6      | -0.5  |
| hsa-mir-25 | GPC5      | -0.47 |
| hsa-mir-25 | HELLS     | 0.54  |
| hsa-mir-25 | HHATL     | -0.47 |
| hsa-mir-25 | HMGB2     | 0.55  |
| hsa-mir-25 | HS3ST2    | -0.45 |
| hsa-mir-25 | HSD11B1   | -0.49 |
| hsa-mir-25 | KIAA1553  | 0.47  |
| hsa-mir-25 | KIF14     | 0.55  |
| hsa-mir-25 | KIF15     | 0.56  |
| hsa-mir-25 | KIF18A    | 0.55  |
| hsa-mir-25 | KIF23     | 0.54  |
| hsa-mir-25 | KIF2C     | 0.58  |
| hsa-mir-25 | KIF4A     | 0.55  |
| hsa-mir-25 | KIFC1     | 0.56  |
| hsa-mir-25 | KLHL2     | -0.57 |
| hsa-mir-25 | KNTC1     | 0.57  |
| hsa-mir-25 | LDHD      | -0.53 |
| hsa-mir-25 | LHPP      | -0.55 |
| hsa-mir-25 | LMNB1     | 0.54  |
| hsa-mir-25 | MAL       | -0.49 |
| hsa-mir-25 | MAP7      | -0.54 |
| hsa-mir-25 | MCM2      | 0.48  |
| hsa-mir-25 | MCM3      | 0.5   |
| hsa-mir-25 | MCM8      | 0.52  |
| hsa-mir-25 | MELK      | 0.55  |
| hsa-mir-25 | MEX3A     | 0.51  |
| hsa-mir-25 | MKI67     | 0.52  |
| hsa-mir-25 | MLF1IP    | 0.54  |
| hsa-mir-25 | MSH6      | 0.47  |
| hsa-mir-25 | NAP1L2    | -0.49 |
| hsa-mir-25 | NCAPG2    | 0.52  |
| hsa-mir-25 | NDC80     | 0.61  |
| hsa-mir-25 | NEIL3     | 0.52  |
| hsa-mir-25 | NUF2      | 0.55  |
| hsa-mir-25 | NUSAP1    | 0.53  |
| hsa-mir-25 | NY-SAR-48 | 0.54  |
| hsa-mir-25 | OIP5      | 0.52  |
| hsa-mir-25 | PBK       | 0.54  |
| hsa-mir-25 | PDE1B     | -0.53 |
| hsa-mir-25 | PLK4      | 0.5   |
| hsa-mir-25 | POLG      | 0.53  |
| hsa-mir-25 | PRC1      | 0.56  |
| hsa-mir-25 | PRKCD     | -0.46 |
| hsa-mir-25 | PSD       | -0.51 |
| hsa-mir-25 | PTTG1     | 0.51  |
| hsa-mir-25 | PTTG2     | 0.49  |
| hsa-mir-25 | RAD51     | 0.53  |
| hsa-mir-25 | RFC4      | 0.48  |
| hsa-mir-25 | SERPINI1  | -0.49 |

|             |          |       |
|-------------|----------|-------|
| hsa-mir-25  | SH3GL3   | -0.41 |
| hsa-mir-25  | SLC39A12 | -0.43 |
| hsa-mir-25  | STEAP2   | -0.43 |
| hsa-mir-25  | TCF3     | 0.55  |
| hsa-mir-25  | TIMELESS | 0.59  |
| hsa-mir-25  | TMEM10   | -0.55 |
| hsa-mir-25  | TMEM144  | -0.54 |
| hsa-mir-25  | TOP2A    | 0.53  |
| hsa-mir-25  | TPX2     | 0.56  |
| hsa-mir-25  | TRIM24   | 0.48  |
| hsa-mir-25  | TRPM2    | -0.48 |
| hsa-mir-25  | TTK      | 0.52  |
| hsa-mir-25  | UBE2C    | 0.57  |
| hsa-mir-25  | WDHD1    | 0.49  |
| hsa-mir-25  | ZNF300   | 0.46  |
| hsa-mir-26a | March9   | 0.61  |
| hsa-mir-26a | AVIL     | 0.56  |
| hsa-mir-26a | CDK4     | 0.49  |
| hsa-mir-26a | CDK8     | 0.36  |
| hsa-mir-26a | CENTG1   | 0.42  |
| hsa-mir-26a | CTDSP2   | 0.65  |
| hsa-mir-26a | CYP27B1  | 0.52  |
| hsa-mir-26a | DAPL1    | 0.08  |
| hsa-mir-26a | DCTN2    | 0.38  |
| hsa-mir-26a | DNER     | 0.19  |
| hsa-mir-26a | DTX3     | 0.41  |
| hsa-mir-26a | FAM119B  | 0.59  |
| hsa-mir-26a | GLI1     | 0.3   |
| hsa-mir-26a | HOXA4    | 0     |
| hsa-mir-26a | HOXC9    | 0.02  |
| hsa-mir-26a | HSD11B1  | -0.03 |
| hsa-mir-26a | JAKMIP1  | 0.08  |
| hsa-mir-26a | KIAA1377 | 0.13  |
| hsa-mir-26a | MBD6     | 0.32  |
| hsa-mir-26a | METTL1   | 0.6   |
| hsa-mir-26a | NLF2     | -0.1  |
| hsa-mir-26a | OS9      | 0.39  |
| hsa-mir-26a | PIP4K2C  | 0.48  |
| hsa-mir-26a | PRB1     | 0.25  |
| hsa-mir-26a | PROCA1   | -0.15 |
| hsa-mir-26a | SLC26A10 | 0.36  |
| hsa-mir-26a | SUSD5    | 0.03  |
| hsa-mir-26a | THSD4    | 0.2   |
| hsa-mir-26a | TKTL1    | 0.25  |
| hsa-mir-26a | TLE4     | 0.22  |
| hsa-mir-26a | TSFM     | 0.65  |
| hsa-mir-26a | TSPAN31  | 0.54  |
| hsa-mir-26a | XRCC6BP1 | 0.59  |
| hsa-mir-26b | CDH19    | -0.2  |
| hsa-mir-26b | CENPN    | -0.21 |
| hsa-mir-26b | CYorf15A | -0.06 |
| hsa-mir-26b | DAZ4     | -0.25 |
| hsa-mir-26b | FLJ38723 | -0.19 |

|             |          |       |
|-------------|----------|-------|
| hsa-mir-26b | MMP12    | -0.16 |
| hsa-mir-26b | NPR3     | -0.31 |
| hsa-mir-26b | RYR3     | 0.15  |
| hsa-mir-26b | SEMA3E   | -0.05 |
| hsa-mir-26b | THSD1    | 0.17  |
| hsa-mir-26b | TUBA1B   | -0.3  |
| hsa-mir-27a | Sept5    | -0.53 |
| hsa-mir-27a | A2BP1    | -0.56 |
| hsa-mir-27a | ABCA1    | 0.46  |
| hsa-mir-27a | ABCC3    | 0.55  |
| hsa-mir-27a | ADAMTS9  | 0.4   |
| hsa-mir-27a | ADCYAP1  | -0.58 |
| hsa-mir-27a | ANK3     | -0.48 |
| hsa-mir-27a | ANKRD25  | 0.55  |
| hsa-mir-27a | ANKRD43  | -0.52 |
| hsa-mir-27a | ANKRD46  | -0.54 |
| hsa-mir-27a | ANXA1    | 0.68  |
| hsa-mir-27a | ANXA2    | 0.62  |
| hsa-mir-27a | ANXA5    | 0.58  |
| hsa-mir-27a | ARHGEF7  | -0.63 |
| hsa-mir-27a | ARPP-21  | -0.57 |
| hsa-mir-27a | ATP6V1G2 | -0.56 |
| hsa-mir-27a | ATRNL1   | -0.58 |
| hsa-mir-27a | BASP1    | -0.59 |
| hsa-mir-27a | BCL11A   | -0.57 |
| hsa-mir-27a | BEX2     | -0.59 |
| hsa-mir-27a | BEX5     | -0.52 |
| hsa-mir-27a | BRUNOL4  | -0.62 |
| hsa-mir-27a | BSN      | -0.6  |
| hsa-mir-27a | BZRAP1   | -0.46 |
| hsa-mir-27a | C10orf35 | -0.36 |
| hsa-mir-27a | C6orf159 | -0.45 |
| hsa-mir-27a | C9orf125 | -0.51 |
| hsa-mir-27a | CABYR    | -0.57 |
| hsa-mir-27a | CACNB3   | -0.52 |
| hsa-mir-27a | CAMKV    | -0.67 |
| hsa-mir-27a | CBLN1    | -0.54 |
| hsa-mir-27a | CCDC102A | 0.57  |
| hsa-mir-27a | CD200    | -0.62 |
| hsa-mir-27a | CD44     | 0.62  |
| hsa-mir-27a | CD63     | 0.58  |
| hsa-mir-27a | CD97     | 0.53  |
| hsa-mir-27a | CDK5R1   | -0.67 |
| hsa-mir-27a | CDKN2D   | -0.49 |
| hsa-mir-27a | CENTG1   | -0.46 |
| hsa-mir-27a | CFI      | 0.5   |
| hsa-mir-27a | CHGB     | -0.46 |
| hsa-mir-27a | CISD1    | -0.39 |
| hsa-mir-27a | CKMT1A   | -0.62 |
| hsa-mir-27a | CLASP2   | -0.62 |
| hsa-mir-27a | CLIC4    | 0.52  |
| hsa-mir-27a | CMTM3    | 0.6   |
| hsa-mir-27a | CNTN3    | -0.6  |



|             |           |       |
|-------------|-----------|-------|
| hsa-mir-27a | CNTN4     | -0.58 |
| hsa-mir-27a | COL5A2    | 0.44  |
| hsa-mir-27a | CPEB3     | -0.58 |
| hsa-mir-27a | CRTAC1    | -0.6  |
| hsa-mir-27a | CUTL2     | -0.64 |
| hsa-mir-27a | CYFIP2    | -0.6  |
| hsa-mir-27a | CYP4X1    | -0.59 |
| hsa-mir-27a | DACH2     | -0.6  |
| hsa-mir-27a | DGKI      | -0.52 |
| hsa-mir-27a | DLGAP1    | -0.52 |
| hsa-mir-27a | DNASE2    | 0.49  |
| hsa-mir-27a | DOCK3     | -0.53 |
| hsa-mir-27a | DOK6      | -0.55 |
| hsa-mir-27a | DPY19L1   | 0.45  |
| hsa-mir-27a | DRAM      | 0.55  |
| hsa-mir-27a | DSCAML1   | -0.54 |
| hsa-mir-27a | DUSP26    | -0.56 |
| hsa-mir-27a | DUSP8     | -0.59 |
| hsa-mir-27a | DYNC111   | -0.51 |
| hsa-mir-27a | EFCBP2    | -0.58 |
| hsa-mir-27a | EFEMP2    | 0.5   |
| hsa-mir-27a | EIF4A2    | -0.52 |
| hsa-mir-27a | EMP1      | 0.62  |
| hsa-mir-27a | EMP3      | 0.62  |
| hsa-mir-27a | EPHA10    | -0.63 |
| hsa-mir-27a | ERC2      | -0.57 |
| hsa-mir-27a | EVL       | -0.64 |
| hsa-mir-27a | EZH2      | 0.11  |
| hsa-mir-27a | FABP6     | -0.58 |
| hsa-mir-27a | FAM107B   | -0.48 |
| hsa-mir-27a | FAM129A   | 0.56  |
| hsa-mir-27a | FAM19A2   | -0.58 |
| hsa-mir-27a | FAM57B    | -0.59 |
| hsa-mir-27a | FAM77C    | -0.53 |
| hsa-mir-27a | FBXL16    | -0.59 |
| hsa-mir-27a | FBXO32    | 0.46  |
| hsa-mir-27a | FBXW7     | -0.57 |
| hsa-mir-27a | FCGBP     | 0.56  |
| hsa-mir-27a | FGF12     | -0.44 |
| hsa-mir-27a | FGF13     | -0.51 |
| hsa-mir-27a | FGF9      | -0.56 |
| hsa-mir-27a | FLJ20699  | 0.44  |
| hsa-mir-27a | FNDC3B    | 0.55  |
| hsa-mir-27a | FNDC5     | -0.53 |
| hsa-mir-27a | FUT9      | -0.57 |
| hsa-mir-27a | GABARAPL3 | -0.41 |
| hsa-mir-27a | GABRB3    | -0.58 |
| hsa-mir-27a | GADD45A   | 0.54  |
| hsa-mir-27a | GBP2      | 0.56  |
| hsa-mir-27a | GDF15     | 0.48  |
| hsa-mir-27a | GNAI1     | -0.51 |
| hsa-mir-27a | GPR177    | 0.49  |
| hsa-mir-27a | GPRASP2   | -0.56 |

|             |           |       |
|-------------|-----------|-------|
| hsa-mir-27a | HDGFRP3   | -0.55 |
| hsa-mir-27a | HECW1     | -0.6  |
| hsa-mir-27a | HPRT1     | -0.29 |
| hsa-mir-27a | HRH1      | 0.48  |
| hsa-mir-27a | IGFBP7    | 0.45  |
| hsa-mir-27a | IL1RAPL1  | -0.55 |
| hsa-mir-27a | INA       | -0.61 |
| hsa-mir-27a | INSM2     | -0.6  |
| hsa-mir-27a | JAKMIP1   | -0.57 |
| hsa-mir-27a | JPH3      | -0.6  |
| hsa-mir-27a | KCNB2     | -0.67 |
| hsa-mir-27a | KHDRBS2   | -0.55 |
| hsa-mir-27a | KIAA1244  | -0.53 |
| hsa-mir-27a | KIAA1598  | -0.49 |
| hsa-mir-27a | KIAA1853  | -0.62 |
| hsa-mir-27a | KLHL1     | -0.59 |
| hsa-mir-27a | KSR2      | -0.59 |
| hsa-mir-27a | LAMB2     | 0.54  |
| hsa-mir-27a | LINGO2    | -0.53 |
| hsa-mir-27a | LMNA      | 0.57  |
| hsa-mir-27a | LOC399947 | -0.44 |
| hsa-mir-27a | LRP10     | 0.54  |
| hsa-mir-27a | LRP11     | -0.43 |
| hsa-mir-27a | M6PRBP1   | 0.58  |
| hsa-mir-27a | MACROD2   | -0.52 |
| hsa-mir-27a | MAGEE1    | -0.59 |
| hsa-mir-27a | MAGI1     | -0.58 |
| hsa-mir-27a | MAL2      | -0.47 |
| hsa-mir-27a | MAST1     | -0.64 |
| hsa-mir-27a | MEF2C     | -0.43 |
| hsa-mir-27a | MEX3A     | -0.1  |
| hsa-mir-27a | MLLT11    | -0.51 |
| hsa-mir-27a | MSN       | 0.57  |
| hsa-mir-27a | MST150    | 0.55  |
| hsa-mir-27a | MUM1L1    | -0.39 |
| hsa-mir-27a | MYT1L     | -0.66 |
| hsa-mir-27a | NAP1L2    | -0.42 |
| hsa-mir-27a | NAP1L3    | -0.6  |
| hsa-mir-27a | NAV3      | -0.42 |
| hsa-mir-27a | NECAP2    | 0.45  |
| hsa-mir-27a | NEK6      | 0.5   |
| hsa-mir-27a | NELL2     | -0.29 |
| hsa-mir-27a | NES       | 0.47  |
| hsa-mir-27a | NMT2      | -0.4  |
| hsa-mir-27a | NPM2      | -0.64 |
| hsa-mir-27a | NRXN1     | -0.51 |
| hsa-mir-27a | NTNG2     | -0.5  |
| hsa-mir-27a | OPCML     | -0.52 |
| hsa-mir-27a | OSMR      | 0.52  |
| hsa-mir-27a | PAK3      | -0.62 |
| hsa-mir-27a | PAK7      | -0.63 |
| hsa-mir-27a | PARP9     | 0.47  |
| hsa-mir-27a | PCSK2     | -0.56 |

|             |              |       |
|-------------|--------------|-------|
| hsa-mir-27a | PDXP         | -0.57 |
| hsa-mir-27a | PFN2         | -0.51 |
| hsa-mir-27a | PGBD5        | -0.5  |
| hsa-mir-27a | PKIA         | -0.46 |
| hsa-mir-27a | PLAU         | 0.5   |
| hsa-mir-27a | PLCB4        | -0.48 |
| hsa-mir-27a | PLEKHA4      | 0.54  |
| hsa-mir-27a | PLOD3        | 0.51  |
| hsa-mir-27a | PLP2         | 0.59  |
| hsa-mir-27a | POSTN        | 0.45  |
| hsa-mir-27a | PPM1E        | -0.5  |
| hsa-mir-27a | PPP1R3B      | 0.54  |
| hsa-mir-27a | PRKCE        | -0.61 |
| hsa-mir-27a | PRNP         | -0.14 |
| hsa-mir-27a | PROS1        | 0.59  |
| hsa-mir-27a | PRRT2        | -0.44 |
| hsa-mir-27a | PTBP2        | -0.57 |
| hsa-mir-27a | PTH2R        | -0.49 |
| hsa-mir-27a | PTRF         | 0.57  |
| hsa-mir-27a | PTTG1IP      | 0.52  |
| hsa-mir-27a | PYGL         | 0.55  |
| hsa-mir-27a | RAB11FIP4    | -0.62 |
| hsa-mir-27a | RAB13        | 0.56  |
| hsa-mir-27a | RAB33A       | -0.58 |
| hsa-mir-27a | RAB34        | 0.49  |
| hsa-mir-27a | RAB3A        | -0.65 |
| hsa-mir-27a | RAPGEF2      | -0.57 |
| hsa-mir-27a | RAPGEF4      | -0.6  |
| hsa-mir-27a | RAPGEF5      | -0.51 |
| hsa-mir-27a | RASL10A      | -0.45 |
| hsa-mir-27a | RASL11B      | -0.47 |
| hsa-mir-27a | REEP1        | -0.55 |
| hsa-mir-27a | RELL1        | 0.34  |
| hsa-mir-27a | REPS2        | -0.54 |
| hsa-mir-27a | RFPL3        | -0.63 |
| hsa-mir-27a | RGS7         | -0.59 |
| hsa-mir-27a | RHOC         | 0.57  |
| hsa-mir-27a | RIMS2        | -0.61 |
| hsa-mir-27a | RIMS3        | -0.64 |
| hsa-mir-27a | RP11-679B17. | -0.59 |
| hsa-mir-27a | RPS6KA5      | -0.6  |
| hsa-mir-27a | RRM2         | 0.22  |
| hsa-mir-27a | RTN4R        | -0.54 |
| hsa-mir-27a | RUFY2        | -0.56 |
| hsa-mir-27a | RUNDC3A      | -0.64 |
| hsa-mir-27a | S100A10      | 0.58  |
| hsa-mir-27a | S100A6       | 0.56  |
| hsa-mir-27a | SAMD9        | 0.38  |
| hsa-mir-27a | SATB1        | -0.61 |
| hsa-mir-27a | SH3GL2       | -0.55 |
| hsa-mir-27a | SH3GL3       | -0.63 |
| hsa-mir-27a | SHANK2       | -0.57 |
| hsa-mir-27a | SLC12A4      | 0.51  |

|             |           |       |
|-------------|-----------|-------|
| hsa-mir-27a | SLC16A4   | 0.39  |
| hsa-mir-27a | SLC17A6   | -0.59 |
| hsa-mir-27a | SLC25A27  | -0.49 |
| hsa-mir-27a | SLC30A3   | -0.58 |
| hsa-mir-27a | SNAP91    | -0.63 |
| hsa-mir-27a | SNIP      | -0.66 |
| hsa-mir-27a | SPARC     | 0.57  |
| hsa-mir-27a | SPG3A     | -0.61 |
| hsa-mir-27a | SPOCD1    | 0.5   |
| hsa-mir-27a | SRPX      | 0.53  |
| hsa-mir-27a | SRPX2     | 0.6   |
| hsa-mir-27a | SRrp35    | -0.48 |
| hsa-mir-27a | SSTR1     | -0.57 |
| hsa-mir-27a | SSTR2     | -0.59 |
| hsa-mir-27a | SSX2IP    | -0.27 |
| hsa-mir-27a | ST18      | -0.56 |
| hsa-mir-27a | STX1B     | -0.53 |
| hsa-mir-27a | STXBP1    | -0.64 |
| hsa-mir-27a | STXBP5L   | -0.52 |
| hsa-mir-27a | STXBP6    | -0.54 |
| hsa-mir-27a | SYNPR     | -0.52 |
| hsa-mir-27a | SYT13     | -0.57 |
| hsa-mir-27a | TAGLN2    | 0.53  |
| hsa-mir-27a | TBC1D9    | -0.37 |
| hsa-mir-27a | TCERG1L   | -0.53 |
| hsa-mir-27a | TEX28     | 0.58  |
| hsa-mir-27a | TGFBI     | 0.48  |
| hsa-mir-27a | TMEFF1    | -0.59 |
| hsa-mir-27a | TMEFF2    | -0.49 |
| hsa-mir-27a | TMEM125   | -0.45 |
| hsa-mir-27a | TMEM16F   | 0.53  |
| hsa-mir-27a | TNC       | 0.57  |
| hsa-mir-27a | TNFRSF12A | 0.61  |
| hsa-mir-27a | TNFRSF1A  | 0.59  |
| hsa-mir-27a | TNRC4     | -0.65 |
| hsa-mir-27a | TRIP6     | 0.54  |
| hsa-mir-27a | TSPYL4    | -0.58 |
| hsa-mir-27a | TTC9B     | -0.54 |
| hsa-mir-27a | TTK       | 0.12  |
| hsa-mir-27a | UGT8      | -0.49 |
| hsa-mir-27a | UNC13A    | -0.49 |
| hsa-mir-27a | VIM       | 0.63  |
| hsa-mir-27a | WASF1     | -0.65 |
| hsa-mir-27a | WDR47     | -0.56 |
| hsa-mir-27a | WWTR1     | 0.58  |
| hsa-mir-27a | YPEL1     | -0.52 |
| hsa-mir-27a | ZFP36L2   | 0.45  |
| hsa-mir-27a | ZNF142    | -0.58 |
| hsa-mir-27a | ZNF238    | -0.5  |
| hsa-mir-27a | ZNF25     | -0.51 |
| hsa-mir-27a | ZNF536    | -0.58 |
| hsa-mir-27b | ARL9      | 0.04  |
| hsa-mir-27b | BEST3     | 0     |

|                |              |       |
|----------------|--------------|-------|
| hsa-mir-27b    | C9orf3       | 0.49  |
| hsa-mir-27b    | COL9A1       | 0.26  |
| hsa-mir-27b    | COL9A2       | 0.44  |
| hsa-mir-27b    | CXCL14       | -0.14 |
| hsa-mir-27b    | G0S2         | -0.15 |
| hsa-mir-27b    | GRB14        | 0.2   |
| hsa-mir-27b    | HSPB3        | 0.18  |
| hsa-mir-27b    | KIT          | 0.24  |
| hsa-mir-27b    | LIMS2        | 0.43  |
| hsa-mir-27b    | LUZP2        | 0.18  |
| hsa-mir-27b    | NXPH1        | 0.28  |
| hsa-mir-27b    | OCIAD2       | 0.02  |
| hsa-mir-27b    | SUSD5        | 0.2   |
| hsa-mir-27b    | UGT8         | 0.22  |
| hsa-mir-27b    | VSNL1        | 0.07  |
| hsa-mir-28     | FLJ38723     | -0.26 |
| hsa-mir-28     | HOXA4        | 0     |
| hsa-mir-28     | HOXC9        | -0.08 |
| hsa-mir-28     | HSD17B11     | 0.16  |
| hsa-mir-28     | LUZP2        | -0.02 |
| hsa-mir-28     | MTMR6        | -0.1  |
| hsa-mir-28     | PRRX2        | 0.07  |
| hsa-mir-296    | ANKS1B       | -0.27 |
| hsa-mir-296    | ATP1A2       | -0.31 |
| hsa-mir-296    | CAMK2B       | -0.24 |
| hsa-mir-296    | CDH4         | -0.05 |
| hsa-mir-296    | CHST6        | -0.09 |
| hsa-mir-296    | CRYBA2       | -0.09 |
| hsa-mir-296    | EVX1         | -0.06 |
| hsa-mir-296    | FBXL16       | -0.29 |
| hsa-mir-296    | GALNTL1      | -0.22 |
| hsa-mir-296    | GEFT         | -0.11 |
| hsa-mir-296    | GPR65        | 0.14  |
| hsa-mir-296    | GPR78        | 0.03  |
| hsa-mir-296    | KHDRBS2      | -0.33 |
| hsa-mir-296    | KIAA1045     | -0.27 |
| hsa-mir-296    | LCE1D        | -0.01 |
| hsa-mir-296    | LOC339344    | -0.06 |
| hsa-mir-296    | LOC347273    | -0.02 |
| hsa-mir-296    | PITX2        | 0.02  |
| hsa-mir-296    | RP13-102H20. | -0.3  |
| hsa-mir-296    | SLC35F3      | -0.26 |
| hsa-mir-296    | TAC3         | -0.21 |
| hsa-mir-296    | XK           | -0.32 |
| hsa-mir-296    | XRCC6BP1     | -0.23 |
| hsa-mir-299-3p | ABCG5        | 0.34  |
| hsa-mir-299-3p | ANKAR        | -0.33 |
| hsa-mir-299-3p | ANKIB1       | -0.25 |
| hsa-mir-299-3p | ARHGEF19     | 0.27  |
| hsa-mir-299-3p | ART5         | 0.29  |
| hsa-mir-299-3p | BLID         | -0.14 |
| hsa-mir-299-3p | BMP5         | 0.22  |
| hsa-mir-299-3p | C8A          | 0.32  |

|                |          |       |
|----------------|----------|-------|
| hsa-mir-299-3p | CAPN6    | 0.29  |
| hsa-mir-299-3p | CD1E     | 0.3   |
| hsa-mir-299-3p | CLDN6    | 0.27  |
| hsa-mir-299-3p | CSN1S1   | 0.2   |
| hsa-mir-299-3p | CYP24A1  | 0.31  |
| hsa-mir-299-3p | DSCR6    | 0.27  |
| hsa-mir-299-3p | ECEL1    | 0.17  |
| hsa-mir-299-3p | ESX1     | 0.34  |
| hsa-mir-299-3p | GABRG3   | 0.37  |
| hsa-mir-299-3p | GATA2    | 0.32  |
| hsa-mir-299-3p | GLIS1    | 0.36  |
| hsa-mir-299-3p | GSTA2    | 0.3   |
| hsa-mir-299-3p | GSTA5    | 0.32  |
| hsa-mir-299-3p | KCNG3    | 0.34  |
| hsa-mir-299-3p | KIAA1909 | 0.16  |
| hsa-mir-299-3p | KLK10    | 0.33  |
| hsa-mir-299-3p | KRT12    | 0.33  |
| hsa-mir-299-3p | KRT15    | 0.3   |
| hsa-mir-299-3p | KRTDAP   | 0.33  |
| hsa-mir-299-3p | MAGEA9   | 0.24  |
| hsa-mir-299-3p | MME      | 0.3   |
| hsa-mir-299-3p | MOCOS    | 0.23  |
| hsa-mir-299-3p | MYPN     | 0.3   |
| hsa-mir-299-3p | NEB      | -0.32 |
| hsa-mir-299-3p | PAGE1    | 0.29  |
| hsa-mir-299-3p | PCSK9    | 0.24  |
| hsa-mir-299-3p | PRDM9    | 0.33  |
| hsa-mir-299-3p | PTGFR    | 0.37  |
| hsa-mir-299-3p | PTPRU    | 0.29  |
| hsa-mir-299-3p | RIPK4    | 0.27  |
| hsa-mir-299-3p | TFAP2C   | 0.29  |
| hsa-mir-299-3p | TMEM171  | 0.35  |
| hsa-mir-299-3p | TP53TG3  | 0.26  |
| hsa-mir-299-3p | UGT2B28  | 0.3   |
| hsa-mir-299-5p | March11  | 0.46  |
| hsa-mir-299-5p | CDH9     | 0.41  |
| hsa-mir-299-5p | GREM2    | 0.43  |
| hsa-mir-299-5p | JAKMIP1  | 0.21  |
| hsa-mir-299-5p | KCNG3    | 0.45  |
| hsa-mir-299-5p | MEG3     | 0.54  |
| hsa-mir-299-5p | NGEF     | 0.41  |
| hsa-mir-299-5p | PLAC2    | 0.49  |
| hsa-mir-299-5p | SMPX     | 0.35  |
| hsa-mir-299-5p | SSTR1    | 0.43  |
| hsa-mir-299-5p | WFDC1    | 0.38  |
| hsa-mir-299-5p | ZMAT4    | 0.41  |
| hsa-mir-29a    | AADAACL1 | 0.52  |
| hsa-mir-29a    | AHNAK2   | 0.34  |
| hsa-mir-29a    | AQP4     | 0.2   |
| hsa-mir-29a    | ASF1B    | -0.36 |
| hsa-mir-29a    | ATAD5    | -0.54 |
| hsa-mir-29a    | AURKB    | -0.47 |
| hsa-mir-29a    | BBOX1    | 0.31  |

|             |             |       |
|-------------|-------------|-------|
| hsa-mir-29a | BIRC5       | -0.43 |
| hsa-mir-29a | BRI3        | 0.33  |
| hsa-mir-29a | BUB1B       | -0.47 |
| hsa-mir-29a | C11orf82    | -0.48 |
| hsa-mir-29a | C13orf3     | -0.49 |
| hsa-mir-29a | C15orf42    | -0.52 |
| hsa-mir-29a | C16orf59    | -0.49 |
| hsa-mir-29a | C18orf54    | -0.52 |
| hsa-mir-29a | C1orf106    | -0.49 |
| hsa-mir-29a | C1orf135    | -0.41 |
| hsa-mir-29a | C1orf190    | 0.48  |
| hsa-mir-29a | C21orf62    | 0.29  |
| hsa-mir-29a | C5orf13     | -0.44 |
| hsa-mir-29a | C6orf1      | 0.4   |
| hsa-mir-29a | C6orf129    | -0.39 |
| hsa-mir-29a | C9orf95     | 0.43  |
| hsa-mir-29a | CCDC5       | -0.43 |
| hsa-mir-29a | CCNB2       | -0.46 |
| hsa-mir-29a | CD274       | 0.43  |
| hsa-mir-29a | CDC2        | -0.43 |
| hsa-mir-29a | CDC25A      | -0.57 |
| hsa-mir-29a | CDC25C      | -0.44 |
| hsa-mir-29a | CDC45L      | -0.54 |
| hsa-mir-29a | CDC6        | -0.43 |
| hsa-mir-29a | CDC7        | -0.49 |
| hsa-mir-29a | CDCA5       | -0.47 |
| hsa-mir-29a | CEBPE       | 0.42  |
| hsa-mir-29a | CENPJ       | -0.5  |
| hsa-mir-29a | CENPM       | -0.45 |
| hsa-mir-29a | CHAF1A      | -0.46 |
| hsa-mir-29a | CKAP2L      | -0.44 |
| hsa-mir-29a | CLRN3       | 0.56  |
| hsa-mir-29a | CLSPN       | -0.44 |
| hsa-mir-29a | CPXM1       | -0.36 |
| hsa-mir-29a | CREBL2      | 0.5   |
| hsa-mir-29a | CROT        | 0.37  |
| hsa-mir-29a | CXCL14      | 0.39  |
| hsa-mir-29a | DBN1        | -0.43 |
| hsa-mir-29a | DCX         | -0.35 |
| hsa-mir-29a | DDIT4L      | 0.38  |
| hsa-mir-29a | DEPDC1B     | -0.47 |
| hsa-mir-29a | DGCR8       | -0.41 |
| hsa-mir-29a | KFZp762E131 | -0.46 |
| hsa-mir-29a | DLG7        | -0.41 |
| hsa-mir-29a | DNAH9       | 0.37  |
| hsa-mir-29a | DNMT3B      | -0.54 |
| hsa-mir-29a | DTL         | -0.52 |
| hsa-mir-29a | E2F1        | -0.45 |
| hsa-mir-29a | EDG1        | 0.19  |
| hsa-mir-29a | EPHB3       | -0.32 |
| hsa-mir-29a | ESCO2       | -0.48 |
| hsa-mir-29a | EYA1        | -0.28 |
| hsa-mir-29a | FAM27E1     | -0.39 |

|             |          |       |
|-------------|----------|-------|
| hsa-mir-29a | FAM54A   | -0.34 |
| hsa-mir-29a | FAM64A   | -0.45 |
| hsa-mir-29a | FAM77C   | -0.45 |
| hsa-mir-29a | FANCA    | -0.5  |
| hsa-mir-29a | FANCD2   | -0.52 |
| hsa-mir-29a | FANCE    | -0.44 |
| hsa-mir-29a | FANCI    | -0.46 |
| hsa-mir-29a | FBXO5    | -0.45 |
| hsa-mir-29a | FEN1     | -0.4  |
| hsa-mir-29a | FER1L3   | 0.4   |
| hsa-mir-29a | FGF1     | 0.44  |
| hsa-mir-29a | FLJ41603 | 0.49  |
| hsa-mir-29a | FMO3     | 0.26  |
| hsa-mir-29a | GNG4     | -0.55 |
| hsa-mir-29a | GPR137C  | -0.25 |
| hsa-mir-29a | GSG2     | -0.45 |
| hsa-mir-29a | GSTA4    | -0.33 |
| hsa-mir-29a | GSTK1    | 0.29  |
| hsa-mir-29a | GTSE1    | -0.52 |
| hsa-mir-29a | H3F3A    | -0.52 |
| hsa-mir-29a | HES6     | -0.43 |
| hsa-mir-29a | HIST1H4C | -0.4  |
| hsa-mir-29a | HMGB3    | -0.54 |
| hsa-mir-29a | HN1      | -0.44 |
| hsa-mir-29a | HOXD3    | -0.36 |
| hsa-mir-29a | KIAA1553 | -0.45 |
| hsa-mir-29a | KIF15    | -0.48 |
| hsa-mir-29a | KIFC1    | -0.53 |
| hsa-mir-29a | LAPTM4B  | -0.44 |
| hsa-mir-29a | LIG1     | -0.5  |
| hsa-mir-29a | LIN9     | -0.5  |
| hsa-mir-29a | LMNB1    | -0.49 |
| hsa-mir-29a | LYVE1    | 0.44  |
| hsa-mir-29a | MARCO    | 0.42  |
| hsa-mir-29a | MCFD2    | 0.46  |
| hsa-mir-29a | MCM10    | -0.51 |
| hsa-mir-29a | MEX3A    | -0.63 |
| hsa-mir-29a | MFSD7    | 0.4   |
| hsa-mir-29a | MIRH1    | -0.46 |
| hsa-mir-29a | MLF1IP   | -0.43 |
| hsa-mir-29a | MMP15    | -0.47 |
| hsa-mir-29a | MNX1     | -0.41 |
| hsa-mir-29a | MST150   | 0.37  |
| hsa-mir-29a | MT1E     | 0.44  |
| hsa-mir-29a | MT1H     | 0.41  |
| hsa-mir-29a | MTRR     | 0.22  |
| hsa-mir-29a | MXD3     | -0.47 |
| hsa-mir-29a | MYB      | -0.48 |
| hsa-mir-29a | MYBL2    | -0.54 |
| hsa-mir-29a | MYBPH    | 0.27  |
| hsa-mir-29a | MYL5     | 0.42  |
| hsa-mir-29a | NCAPH    | -0.55 |
| hsa-mir-29a | NLRP3    | 0.48  |



|             |           |       |
|-------------|-----------|-------|
| hsa-mir-29a | NOL4      | -0.06 |
| hsa-mir-29a | NR3C2     | 0.39  |
| hsa-mir-29a | NRCAM     | 0.52  |
| hsa-mir-29a | NUF2      | -0.45 |
| hsa-mir-29a | NUSAP1    | -0.46 |
| hsa-mir-29a | NY-SAR-48 | -0.52 |
| hsa-mir-29a | ONECUT2   | -0.56 |
| hsa-mir-29a | ORC6L     | -0.48 |
| hsa-mir-29a | PARP3     | 0.42  |
| hsa-mir-29a | PLK4      | -0.45 |
| hsa-mir-29a | POLQ      | -0.5  |
| hsa-mir-29a | POU4F1    | -0.39 |
| hsa-mir-29a | PQLC3     | 0.41  |
| hsa-mir-29a | RACGAP1P  | -0.46 |
| hsa-mir-29a | RAD51     | -0.47 |
| hsa-mir-29a | RAD54L    | -0.48 |
| hsa-mir-29a | RANBP1    | -0.52 |
| hsa-mir-29a | RCAN2     | 0.29  |
| hsa-mir-29a | RFC3      | -0.53 |
| hsa-mir-29a | SCML2     | -0.35 |
| hsa-mir-29a | SIX1      | -0.34 |
| hsa-mir-29a | SLC25A18  | 0.33  |
| hsa-mir-29a | SOX11     | -0.51 |
| hsa-mir-29a | SOX4      | -0.55 |
| hsa-mir-29a | SPAG5     | -0.47 |
| hsa-mir-29a | STIL      | -0.4  |
| hsa-mir-29a | TACC3     | -0.4  |
| hsa-mir-29a | TDRKH     | -0.06 |
| hsa-mir-29a | TK1       | -0.37 |
| hsa-mir-29a | TMEM120A  | 0.36  |
| hsa-mir-29a | TMSL8     | -0.49 |
| hsa-mir-29a | TOP2A     | -0.49 |
| hsa-mir-29a | TPP1      | 0.47  |
| hsa-mir-29a | TPX2      | -0.45 |
| hsa-mir-29a | TRAF4     | -0.4  |
| hsa-mir-29a | TRAIP     | -0.56 |
| hsa-mir-29a | TRIP13    | -0.39 |
| hsa-mir-29a | TTK       | -0.45 |
| hsa-mir-29a | TYMS      | -0.4  |
| hsa-mir-29a | UBE2C     | -0.45 |
| hsa-mir-29a | UBE2T     | -0.42 |
| hsa-mir-29a | ZMYND12   | 0.44  |
| hsa-mir-29b | AADAACL1  | 0.58  |
| hsa-mir-29b | ACTL6A    | -0.45 |
| hsa-mir-29b | ANKRD29   | 0.29  |
| hsa-mir-29b | ANKRD43   | 0.33  |
| hsa-mir-29b | ANXA11    | 0.48  |
| hsa-mir-29b | ARL6IP2   | 0.02  |
| hsa-mir-29b | ASF1B     | -0.42 |
| hsa-mir-29b | ASPHD1    | 0.36  |
| hsa-mir-29b | ATAD5     | -0.53 |
| hsa-mir-29b | BARD1     | -0.46 |
| hsa-mir-29b | BIRC5     | -0.54 |

|             |             |       |
|-------------|-------------|-------|
| hsa-mir-29b | BUB1        | -0.47 |
| hsa-mir-29b | C11orf82    | -0.55 |
| hsa-mir-29b | C12orf41    | -0.37 |
| hsa-mir-29b | C12orf54    | 0.5   |
| hsa-mir-29b | C13orf3     | -0.54 |
| hsa-mir-29b | C15orf42    | -0.51 |
| hsa-mir-29b | C18orf24    | -0.47 |
| hsa-mir-29b | C18orf54    | -0.54 |
| hsa-mir-29b | C20orf194   | 0.38  |
| hsa-mir-29b | C5orf13     | -0.48 |
| hsa-mir-29b | CACNA2D3    | 0.32  |
| hsa-mir-29b | CBX7        | 0.52  |
| hsa-mir-29b | CCDC138     | -0.43 |
| hsa-mir-29b | CCDC5       | -0.51 |
| hsa-mir-29b | CCNA2       | -0.52 |
| hsa-mir-29b | CCNB2       | -0.54 |
| hsa-mir-29b | CDC2        | -0.51 |
| hsa-mir-29b | CDC45L      | -0.58 |
| hsa-mir-29b | CDC7        | -0.44 |
| hsa-mir-29b | CDCA3       | -0.53 |
| hsa-mir-29b | CDCA7       | -0.55 |
| hsa-mir-29b | CDH9        | 0.17  |
| hsa-mir-29b | CDK2        | -0.47 |
| hsa-mir-29b | CDKN2C      | -0.34 |
| hsa-mir-29b | CDT1        | -0.49 |
| hsa-mir-29b | CENPA       | -0.5  |
| hsa-mir-29b | CENPK       | -0.47 |
| hsa-mir-29b | CENPM       | -0.52 |
| hsa-mir-29b | CHEK1       | -0.42 |
| hsa-mir-29b | ChGn        | 0.21  |
| hsa-mir-29b | CKAP2L      | -0.53 |
| hsa-mir-29b | CKS1B       | -0.46 |
| hsa-mir-29b | CLRN3       | 0.51  |
| hsa-mir-29b | CPNE9       | 0.49  |
| hsa-mir-29b | CPXM1       | -0.47 |
| hsa-mir-29b | DDX39       | -0.54 |
| hsa-mir-29b | DEPDC1B     | -0.51 |
| hsa-mir-29b | KFZp762E131 | -0.55 |
| hsa-mir-29b | DLG7        | -0.51 |
| hsa-mir-29b | DNAH9       | 0.26  |
| hsa-mir-29b | DNMT3B      | -0.47 |
| hsa-mir-29b | DTL         | -0.54 |
| hsa-mir-29b | ERCC6L      | -0.46 |
| hsa-mir-29b | ESCO2       | -0.55 |
| hsa-mir-29b | EXO1        | -0.54 |
| hsa-mir-29b | EZH2        | -0.49 |
| hsa-mir-29b | F2R         | -0.3  |
| hsa-mir-29b | FAM54A      | -0.43 |
| hsa-mir-29b | FAM60A      | -0.52 |
| hsa-mir-29b | FAM64A      | -0.51 |
| hsa-mir-29b | FANCA       | -0.47 |
| hsa-mir-29b | FANCC       | -0.54 |
| hsa-mir-29b | FANCD2      | -0.56 |

|             |           |       |
|-------------|-----------|-------|
| hsa-mir-29b | FANCI     | -0.52 |
| hsa-mir-29b | FBXL2     | 0.29  |
| hsa-mir-29b | FLJ41603  | 0.53  |
| hsa-mir-29b | FRMPD4    | 0.38  |
| hsa-mir-29b | GABRB1    | 0.25  |
| hsa-mir-29b | GINS2     | -0.48 |
| hsa-mir-29b | GRIN3A    | 0.35  |
| hsa-mir-29b | GTSE1     | -0.56 |
| hsa-mir-29b | H3F3A     | -0.5  |
| hsa-mir-29b | HCN1      | 0.32  |
| hsa-mir-29b | HIST1H1B  | -0.44 |
| hsa-mir-29b | HMG2      | -0.52 |
| hsa-mir-29b | HOXD8     | -0.33 |
| hsa-mir-29b | HRASLS3   | 0.43  |
| hsa-mir-29b | HS3ST2    | 0.42  |
| hsa-mir-29b | IQWD1     | 0.43  |
| hsa-mir-29b | KDELC1    | -0.41 |
| hsa-mir-29b | KIAA0101  | -0.48 |
| hsa-mir-29b | KIAA0513  | 0.43  |
| hsa-mir-29b | KIAA1467  | 0.33  |
| hsa-mir-29b | KIAA1553  | -0.44 |
| hsa-mir-29b | KIF15     | -0.52 |
| hsa-mir-29b | KIFC1     | -0.57 |
| hsa-mir-29b | KNDC1     | 0.48  |
| hsa-mir-29b | KRT222P   | 0.32  |
| hsa-mir-29b | LAPTM4B   | -0.43 |
| hsa-mir-29b | LDHD      | 0.53  |
| hsa-mir-29b | LIMCH1    | 0.15  |
| hsa-mir-29b | LINGO2    | 0.14  |
| hsa-mir-29b | LMNB1     | -0.5  |
| hsa-mir-29b | LOC201725 | -0.52 |
| hsa-mir-29b | LOC492311 | 0.43  |
| hsa-mir-29b | LPPR4     | 0.26  |
| hsa-mir-29b | LRRN1     | -0.36 |
| hsa-mir-29b | MAD2L2    | -0.43 |
| hsa-mir-29b | MCM10     | -0.52 |
| hsa-mir-29b | MDFI      | -0.42 |
| hsa-mir-29b | MELK      | -0.48 |
| hsa-mir-29b | MEX3A     | -0.59 |
| hsa-mir-29b | MFSD4     | 0.43  |
| hsa-mir-29b | MLF1IP    | -0.52 |
| hsa-mir-29b | MND1      | -0.48 |
| hsa-mir-29b | MYBL2     | -0.56 |
| hsa-mir-29b | MYRIP     | 0.34  |
| hsa-mir-29b | NAT8L     | 0.22  |
| hsa-mir-29b | NCAPH     | -0.58 |
| hsa-mir-29b | NCDN      | 0.5   |
| hsa-mir-29b | NDC80     | -0.51 |
| hsa-mir-29b | NKAPL     | 0.38  |
| hsa-mir-29b | NUF2      | -0.53 |
| hsa-mir-29b | NUP107    | -0.34 |
| hsa-mir-29b | NUSAP1    | -0.53 |
| hsa-mir-29b | NY-SAR-48 | -0.6  |

|             |           |       |
|-------------|-----------|-------|
| hsa-mir-29b | OGDHL     | 0.45  |
| hsa-mir-29b | OIP5      | -0.52 |
| hsa-mir-29b | PAOX      | 0.43  |
| hsa-mir-29b | PBK       | -0.49 |
| hsa-mir-29b | PEBP4     | 0.43  |
| hsa-mir-29b | PGF       | -0.3  |
| hsa-mir-29b | PHLDA1    | -0.28 |
| hsa-mir-29b | PHYHIP    | 0.42  |
| hsa-mir-29b | POLE2     | -0.48 |
| hsa-mir-29b | POLQ      | -0.49 |
| hsa-mir-29b | PPIL5     | -0.46 |
| hsa-mir-29b | PPP1R14B  | -0.45 |
| hsa-mir-29b | PRRT3     | 0.49  |
| hsa-mir-29b | RAB11FIP5 | 0.48  |
| hsa-mir-29b | RACGAP1   | -0.48 |
| hsa-mir-29b | RACGAP1P  | -0.52 |
| hsa-mir-29b | RAD51     | -0.56 |
| hsa-mir-29b | RAD51AP1  | -0.5  |
| hsa-mir-29b | RANBP1    | -0.52 |
| hsa-mir-29b | RCAN2     | 0.35  |
| hsa-mir-29b | RFC3      | -0.51 |
| hsa-mir-29b | RFC4      | -0.49 |
| hsa-mir-29b | RNASEH2A  | -0.51 |
| hsa-mir-29b | RRM2      | -0.48 |
| hsa-mir-29b | SC65      | -0.33 |
| hsa-mir-29b | SCN2B     | 0.44  |
| hsa-mir-29b | SERGEF    | 0.33  |
| hsa-mir-29b | SGOL2     | -0.5  |
| hsa-mir-29b | SH2D5     | 0.41  |
| hsa-mir-29b | SLC22A15  | 0.39  |
| hsa-mir-29b | SORL1     | 0.36  |
| hsa-mir-29b | SOX11     | -0.52 |
| hsa-mir-29b | SOX4      | -0.52 |
| hsa-mir-29b | SPC25     | -0.51 |
| hsa-mir-29b | STAT4     | 0.42  |
| hsa-mir-29b | STEAP2    | 0.41  |
| hsa-mir-29b | STIL      | -0.44 |
| hsa-mir-29b | SV2B      | 0.32  |
| hsa-mir-29b | TACC3     | -0.5  |
| hsa-mir-29b | TEX2      | 0.49  |
| hsa-mir-29b | TIMELESS  | -0.51 |
| hsa-mir-29b | TLN2      | 0.41  |
| hsa-mir-29b | TMEM157   | 0.45  |
| hsa-mir-29b | TMEM24    | 0.43  |
| hsa-mir-29b | TOP2A     | -0.54 |
| hsa-mir-29b | TRAF4     | -0.45 |
| hsa-mir-29b | TRAIP     | -0.55 |
| hsa-mir-29b | TRIB2     | -0.32 |
| hsa-mir-29b | TRMT5     | -0.46 |
| hsa-mir-29b | TTK       | -0.52 |
| hsa-mir-29b | TUBA1A    | -0.42 |
| hsa-mir-29b | TYMS      | -0.46 |
| hsa-mir-29b | UBE2C     | -0.54 |

|             |           |       |
|-------------|-----------|-------|
| hsa-mir-29b | ULK2      | 0.25  |
| hsa-mir-29b | WDR76     | -0.46 |
| hsa-mir-29b | ZFYVE28   | 0.45  |
| hsa-mir-29b | ZNF365    | 0.47  |
| hsa-mir-29b | ZNF77     | -0.44 |
| hsa-mir-29c | A2BP1     | 0.47  |
| hsa-mir-29c | AADAACL1  | 0.59  |
| hsa-mir-29c | ABR       | 0.42  |
| hsa-mir-29c | ACVR1C    | 0.44  |
| hsa-mir-29c | ADD3      | 0.37  |
| hsa-mir-29c | AFAP1L1   | -0.33 |
| hsa-mir-29c | AGXT2L1   | 0.49  |
| hsa-mir-29c | AIFM3     | 0.53  |
| hsa-mir-29c | AK5       | 0.54  |
| hsa-mir-29c | ALDH1A1   | 0.42  |
| hsa-mir-29c | ALDH2     | 0.46  |
| hsa-mir-29c | ANKRD43   | 0.45  |
| hsa-mir-29c | ANXA3     | 0.44  |
| hsa-mir-29c | APOC1     | 0.15  |
| hsa-mir-29c | ARHGAP11A | -0.47 |
| hsa-mir-29c | ASPM      | -0.57 |
| hsa-mir-29c | ATP1A2    | 0.31  |
| hsa-mir-29c | ATP2B3    | 0.52  |
| hsa-mir-29c | AURKA     | -0.52 |
| hsa-mir-29c | BARD1     | -0.5  |
| hsa-mir-29c | BAZ1A     | -0.5  |
| hsa-mir-29c | BIN1      | 0.52  |
| hsa-mir-29c | BUB1      | -0.59 |
| hsa-mir-29c | C11orf82  | -0.56 |
| hsa-mir-29c | C12orf48  | -0.46 |
| hsa-mir-29c | C13orf3   | -0.56 |
| hsa-mir-29c | C16orf5   | 0.46  |
| hsa-mir-29c | C18orf24  | -0.52 |
| hsa-mir-29c | C1QTNF4   | 0.42  |
| hsa-mir-29c | C5orf13   | -0.42 |
| hsa-mir-29c | C9orf24   | 0.42  |
| hsa-mir-29c | CA11      | 0.55  |
| hsa-mir-29c | CACNA2D3  | 0.41  |
| hsa-mir-29c | CACNG3    | 0.54  |
| hsa-mir-29c | CAMK2A    | 0.52  |
| hsa-mir-29c | CAMK2G    | 0.51  |
| hsa-mir-29c | CAMKK1    | 0.5   |
| hsa-mir-29c | CASC5     | -0.53 |
| hsa-mir-29c | CBLN2     | 0.38  |
| hsa-mir-29c | CBX7      | 0.67  |
| hsa-mir-29c | CCDC18    | -0.45 |
| hsa-mir-29c | CCDC5     | -0.49 |
| hsa-mir-29c | CCKBR     | 0.49  |
| hsa-mir-29c | CCNB1     | -0.51 |
| hsa-mir-29c | CCNB2     | -0.58 |
| hsa-mir-29c | CDC45L    | -0.57 |
| hsa-mir-29c | CDC6      | -0.54 |
| hsa-mir-29c | CDCA4     | -0.45 |

|             |             |       |
|-------------|-------------|-------|
| hsa-mir-29c | CDCA7       | -0.56 |
| hsa-mir-29c | CDCA8       | -0.55 |
| hsa-mir-29c | CDH18       | 0.43  |
| hsa-mir-29c | CDH9        | 0.47  |
| hsa-mir-29c | CDKN3       | -0.45 |
| hsa-mir-29c | CDS1        | 0.49  |
| hsa-mir-29c | CENPA       | -0.57 |
| hsa-mir-29c | CENPE       | -0.55 |
| hsa-mir-29c | CENPF       | -0.54 |
| hsa-mir-29c | CENPK       | -0.53 |
| hsa-mir-29c | CEP55       | -0.53 |
| hsa-mir-29c | CHEK1       | -0.56 |
| hsa-mir-29c | CHIC1       | 0.43  |
| hsa-mir-29c | CHN1        | 0.5   |
| hsa-mir-29c | CKAP2L      | -0.53 |
| hsa-mir-29c | CLTB        | 0.49  |
| hsa-mir-29c | COL4A1      | -0.46 |
| hsa-mir-29c | COL4A2      | -0.43 |
| hsa-mir-29c | CPEB1       | 0.57  |
| hsa-mir-29c | CPEB3       | 0.54  |
| hsa-mir-29c | CREG2       | 0.54  |
| hsa-mir-29c | CRHBP       | 0.5   |
| hsa-mir-29c | CRYM        | 0.45  |
| hsa-mir-29c | DACH2       | 0.38  |
| hsa-mir-29c | DCC1        | -0.54 |
| hsa-mir-29c | DCHS1       | -0.35 |
| hsa-mir-29c | DDX39       | -0.51 |
| hsa-mir-29c | DEPDC1B     | -0.5  |
| hsa-mir-29c | KFZp762E131 | -0.58 |
| hsa-mir-29c | DKK3        | 0.46  |
| hsa-mir-29c | DLG2        | 0.45  |
| hsa-mir-29c | DLG7        | -0.61 |
| hsa-mir-29c | DNAJA4      | 0.43  |
| hsa-mir-29c | DNMT1       | -0.45 |
| hsa-mir-29c | DRD1        | 0.53  |
| hsa-mir-29c | DRD1IP      | 0.55  |
| hsa-mir-29c | DTL         | -0.55 |
| hsa-mir-29c | DYNC111     | 0.42  |
| hsa-mir-29c | E2F5        | -0.42 |
| hsa-mir-29c | E2F8        | -0.54 |
| hsa-mir-29c | EFHD1       | 0.4   |
| hsa-mir-29c | ELOVL7      | 0.45  |
| hsa-mir-29c | EPB49       | 0.53  |
| hsa-mir-29c | EPS15       | 0.49  |
| hsa-mir-29c | ERCC6L      | -0.51 |
| hsa-mir-29c | ESCO2       | -0.58 |
| hsa-mir-29c | EXO1        | -0.54 |
| hsa-mir-29c | EZH2        | -0.56 |
| hsa-mir-29c | FAM19A4     | 0.38  |
| hsa-mir-29c | FAM54A      | -0.52 |
| hsa-mir-29c | FAM64A      | -0.58 |
| hsa-mir-29c | FAM79A      | 0.59  |
| hsa-mir-29c | FAM83D      | -0.46 |

|             |           |       |
|-------------|-----------|-------|
| hsa-mir-29c | FANCC     | -0.55 |
| hsa-mir-29c | FANCD2    | -0.56 |
| hsa-mir-29c | FANCE     | -0.46 |
| hsa-mir-29c | FANCI     | -0.57 |
| hsa-mir-29c | FBXO2     | 0.53  |
| hsa-mir-29c | FBXO44    | 0.42  |
| hsa-mir-29c | FBXO5     | -0.57 |
| hsa-mir-29c | FGFR2     | 0.38  |
| hsa-mir-29c | FLJ20489  | 0.43  |
| hsa-mir-29c | FLJ37464  | 0.57  |
| hsa-mir-29c | FRMPD4    | 0.52  |
| hsa-mir-29c | GABARAPL1 | 0.53  |
| hsa-mir-29c | GABARAPL3 | 0.56  |
| hsa-mir-29c | GABRA1    | 0.5   |
| hsa-mir-29c | GABRA2    | 0.42  |
| hsa-mir-29c | GABRA5    | 0.43  |
| hsa-mir-29c | GABRG1    | 0.49  |
| hsa-mir-29c | GDA       | 0.46  |
| hsa-mir-29c | GINS1     | -0.52 |
| hsa-mir-29c | GINS2     | -0.52 |
| hsa-mir-29c | GJA7      | -0.54 |
| hsa-mir-29c | GLS2      | 0.54  |
| hsa-mir-29c | GPRASP1   | 0.41  |
| hsa-mir-29c | HCN1      | 0.52  |
| hsa-mir-29c | HELLS     | -0.5  |
| hsa-mir-29c | HHATL     | 0.5   |
| hsa-mir-29c | HLF       | 0.43  |
| hsa-mir-29c | HS3ST4    | 0.59  |
| hsa-mir-29c | HSD11B1   | 0.44  |
| hsa-mir-29c | HTR1E     | 0.47  |
| hsa-mir-29c | ISCU      | 0.6   |
| hsa-mir-29c | JAKMIP1   | 0.39  |
| hsa-mir-29c | KCNA4     | 0.45  |
| hsa-mir-29c | KCNC2     | 0.44  |
| hsa-mir-29c | KCNK1     | 0.47  |
| hsa-mir-29c | KCNMB4    | 0.28  |
| hsa-mir-29c | KDEL1C1   | -0.51 |
| hsa-mir-29c | KHDRBS2   | 0.41  |
| hsa-mir-29c | KIAA0101  | -0.51 |
| hsa-mir-29c | KIAA0319  | 0.41  |
| hsa-mir-29c | KIAA0513  | 0.58  |
| hsa-mir-29c | KIAA0748  | 0.5   |
| hsa-mir-29c | KIAA0922  | -0.42 |
| hsa-mir-29c | KIAA1045  | 0.4   |
| hsa-mir-29c | KIAA1107  | 0.48  |
| hsa-mir-29c | KIAA1189  | 0.42  |
| hsa-mir-29c | KIAA1239  | 0.43  |
| hsa-mir-29c | KIAA1622  | 0.52  |
| hsa-mir-29c | KIF14     | -0.53 |
| hsa-mir-29c | KIF15     | -0.59 |
| hsa-mir-29c | KIF18A    | -0.53 |
| hsa-mir-29c | KIF23     | -0.56 |
| hsa-mir-29c | KIF2C     | -0.55 |

|             |           |       |
|-------------|-----------|-------|
| hsa-mir-29c | KIF6      | 0.49  |
| hsa-mir-29c | KLHL2     | 0.54  |
| hsa-mir-29c | KNDC1     | 0.5   |
| hsa-mir-29c | KNTC1     | -0.48 |
| hsa-mir-29c | KRT222P   | 0.55  |
| hsa-mir-29c | LARP6     | 0.54  |
| hsa-mir-29c | LDHD      | 0.59  |
| hsa-mir-29c | LGI1      | 0.46  |
| hsa-mir-29c | LHPP      | 0.51  |
| hsa-mir-29c | LIMA1     | -0.47 |
| hsa-mir-29c | LMNB1     | -0.51 |
| hsa-mir-29c | LMNB2     | -0.45 |
| hsa-mir-29c | LMO3      | 0.39  |
| hsa-mir-29c | LOC201229 | 0.5   |
| hsa-mir-29c | LOC400120 | 0.44  |
| hsa-mir-29c | LOC492311 | 0.52  |
| hsa-mir-29c | MAGEE1    | 0.46  |
| hsa-mir-29c | MAL       | 0.49  |
| hsa-mir-29c | MAL2      | 0.43  |
| hsa-mir-29c | MAP7      | 0.52  |
| hsa-mir-29c | MAST3     | 0.53  |
| hsa-mir-29c | MBNL2     | 0.45  |
| hsa-mir-29c | MCM6      | -0.45 |
| hsa-mir-29c | MEF2C     | 0.47  |
| hsa-mir-29c | MELK      | -0.58 |
| hsa-mir-29c | MFSD4     | 0.49  |
| hsa-mir-29c | MGC39606  | 0.5   |
| hsa-mir-29c | MKI67     | -0.54 |
| hsa-mir-29c | MLF1IP    | -0.56 |
| hsa-mir-29c | MUM1L1    | 0.41  |
| hsa-mir-29c | NAP1L2    | 0.53  |
| hsa-mir-29c | NAPB      | 0.42  |
| hsa-mir-29c | NAV3      | 0.45  |
| hsa-mir-29c | NCAPG2    | -0.49 |
| hsa-mir-29c | NCDN      | 0.55  |
| hsa-mir-29c | NDC80     | -0.6  |
| hsa-mir-29c | NEBL      | 0.4   |
| hsa-mir-29c | NEIL3     | -0.52 |
| hsa-mir-29c | NES       | -0.36 |
| hsa-mir-29c | NEUROD6   | 0.36  |
| hsa-mir-29c | NID2      | -0.39 |
| hsa-mir-29c | NOX4      | -0.44 |
| hsa-mir-29c | NUF2      | -0.56 |
| hsa-mir-29c | NUP107    | -0.32 |
| hsa-mir-29c | NUSAP1    | -0.57 |
| hsa-mir-29c | NY-SAR-48 | -0.59 |
| hsa-mir-29c | OGDHL     | 0.51  |
| hsa-mir-29c | OIP5      | -0.54 |
| hsa-mir-29c | PACSN1    | 0.54  |
| hsa-mir-29c | PAH       | 0.4   |
| hsa-mir-29c | PAOX      | 0.53  |
| hsa-mir-29c | PAQR8     | 0.45  |
| hsa-mir-29c | PBK       | -0.58 |



|             |          |       |
|-------------|----------|-------|
| hsa-mir-29c | PEBP1    | 0.43  |
| hsa-mir-29c | PELI3    | 0.53  |
| hsa-mir-29c | PHYHIP   | 0.55  |
| hsa-mir-29c | PIP3-E   | 0.52  |
| hsa-mir-29c | PLCXD3   | 0.52  |
| hsa-mir-29c | PLEKHA1  | 0.42  |
| hsa-mir-29c | PLEKHB1  | 0.42  |
| hsa-mir-29c | PLEKHG2  | -0.49 |
| hsa-mir-29c | PNCK     | 0.51  |
| hsa-mir-29c | POLE2    | -0.48 |
| hsa-mir-29c | PPM1K    | 0.46  |
| hsa-mir-29c | PPP1R14B | -0.51 |
| hsa-mir-29c | PPP2R2C  | 0.48  |
| hsa-mir-29c | PRC1     | -0.5  |
| hsa-mir-29c | PREPL    | 0.49  |
| hsa-mir-29c | PRKCB1   | 0.51  |
| hsa-mir-29c | PRNP     | 0.54  |
| hsa-mir-29c | PRRT1    | 0.51  |
| hsa-mir-29c | QDPR     | 0.51  |
| hsa-mir-29c | RAD51    | -0.58 |
| hsa-mir-29c | RASAL1   | 0.47  |
| hsa-mir-29c | RBBP8    | -0.47 |
| hsa-mir-29c | RBM11    | 0.5   |
| hsa-mir-29c | REEP5    | 0.54  |
| hsa-mir-29c | RELN     | 0.36  |
| hsa-mir-29c | RFC4     | -0.5  |
| hsa-mir-29c | RICH2    | 0.49  |
| hsa-mir-29c | RPRML    | 0.31  |
| hsa-mir-29c | RRM2     | -0.58 |
| hsa-mir-29c | RYR2     | 0.54  |
| hsa-mir-29c | SAMD12   | 0.52  |
| hsa-mir-29c | SEC14L5  | 0.52  |
| hsa-mir-29c | SERPINI1 | 0.49  |
| hsa-mir-29c | SH3TC2   | 0.42  |
| hsa-mir-29c | SLC12A5  | 0.51  |
| hsa-mir-29c | SLC22A15 | 0.4   |
| hsa-mir-29c | SMC4     | -0.55 |
| hsa-mir-29c | SNCA     | 0.52  |
| hsa-mir-29c | SNCG     | 0.54  |
| hsa-mir-29c | SNPH     | 0.42  |
| hsa-mir-29c | SORL1    | 0.43  |
| hsa-mir-29c | SOSTDC1  | 0.24  |
| hsa-mir-29c | SOX11    | -0.51 |
| hsa-mir-29c | SPC25    | -0.53 |
| hsa-mir-29c | SPOCK3   | 0.48  |
| hsa-mir-29c | STAR     | 0.46  |
| hsa-mir-29c | STEAP2   | 0.46  |
| hsa-mir-29c | STXBP5L  | 0.29  |
| hsa-mir-29c | STXBP6   | 0.36  |
| hsa-mir-29c | STYK1    | 0.46  |
| hsa-mir-29c | SV2B     | 0.49  |
| hsa-mir-29c | SYNCRIP  | -0.5  |
| hsa-mir-29c | SYP      | 0.43  |

|             |             |       |
|-------------|-------------|-------|
| hsa-mir-29c | SYT1        | 0.45  |
| hsa-mir-29c | SYT13       | 0.37  |
| hsa-mir-29c | TACC3       | -0.47 |
| hsa-mir-29c | TBR1        | 0.4   |
| hsa-mir-29c | TCF19       | -0.49 |
| hsa-mir-29c | TCF3        | -0.54 |
| hsa-mir-29c | TDRD9       | 0.46  |
| hsa-mir-29c | TIMELESS    | -0.57 |
| hsa-mir-29c | TK1         | -0.49 |
| hsa-mir-29c | TMEM10      | 0.55  |
| hsa-mir-29c | TMEM24      | 0.49  |
| hsa-mir-29c | TOP2A       | -0.57 |
| hsa-mir-29c | TPD52L1     | 0.46  |
| hsa-mir-29c | TPX2        | -0.57 |
| hsa-mir-29c | TRIM24      | -0.4  |
| hsa-mir-29c | TSPAN19     | 0.36  |
| hsa-mir-29c | TTK         | -0.59 |
| hsa-mir-29c | TUBA8       | 0.47  |
| hsa-mir-29c | TYMS        | -0.55 |
| hsa-mir-29c | UBE2C       | -0.58 |
| hsa-mir-29c | UHRF1       | -0.52 |
| hsa-mir-29c | VSNL1       | 0.49  |
| hsa-mir-29c | WDHD1       | -0.53 |
| hsa-mir-29c | WDR7        | 0.43  |
| hsa-mir-29c | WFS1        | 0.47  |
| hsa-mir-29c | WNT10B      | 0.48  |
| hsa-mir-29c | YBX1        | -0.54 |
| hsa-mir-29c | YPEL3       | 0.44  |
| hsa-mir-29c | ZNF365      | 0.54  |
| hsa-mir-29c | ZNF533      | 0.45  |
| hsa-mir-29c | ZNF84       | -0.41 |
| hsa-mir-301 | ADAM12      | -0.3  |
| hsa-mir-301 | ANGPT1      | -0.28 |
| hsa-mir-301 | ASAM        | -0.27 |
| hsa-mir-301 | ATP13A5     | 0.29  |
| hsa-mir-301 | BAI2        | 0.18  |
| hsa-mir-301 | C18orf18    | 0.35  |
| hsa-mir-301 | C19orf57    | 0.45  |
| hsa-mir-301 | C1orf106    | 0.42  |
| hsa-mir-301 | C1QL1       | 0.34  |
| hsa-mir-301 | C6orf134    | 0.42  |
| hsa-mir-301 | CCL2        | -0.28 |
| hsa-mir-301 | CHD7        | 0.39  |
| hsa-mir-301 | CHST9       | 0.36  |
| hsa-mir-301 | COL1A1      | -0.3  |
| hsa-mir-301 | COL9A1      | 0.43  |
| hsa-mir-301 | CXCL14      | -0.37 |
| hsa-mir-301 | DKFZP564J10 | -0.02 |
| hsa-mir-301 | DKK1        | -0.28 |
| hsa-mir-301 | DSCAM       | 0.29  |
| hsa-mir-301 | DYNLT3      | -0.4  |
| hsa-mir-301 | FADS2       | 0.32  |
| hsa-mir-301 | FHL2        | -0.4  |

|                |           |       |
|----------------|-----------|-------|
| hsa-mir-301    | GLCCI1    | 0.41  |
| hsa-mir-301    | GNG11     | -0.41 |
| hsa-mir-301    | HES6      | 0.44  |
| hsa-mir-301    | HNRPM     | 0.18  |
| hsa-mir-301    | IFITM2    | -0.36 |
| hsa-mir-301    | IGFBP6    | -0.36 |
| hsa-mir-301    | ITGA11    | -0.32 |
| hsa-mir-301    | KLHL23    | 0.44  |
| hsa-mir-301    | LOC388419 | 0.39  |
| hsa-mir-301    | LOC493869 | -0.34 |
| hsa-mir-301    | LRP2BP    | 0.26  |
| hsa-mir-301    | LRRC1     | 0.26  |
| hsa-mir-301    | LUZP2     | 0.27  |
| hsa-mir-301    | MARCKSL1  | 0.42  |
| hsa-mir-301    | MMP16     | 0.32  |
| hsa-mir-301    | NEU4      | 0.38  |
| hsa-mir-301    | PCDH15    | 0.32  |
| hsa-mir-301    | PDE9A     | 0.37  |
| hsa-mir-301    | PDGFRL    | -0.29 |
| hsa-mir-301    | PLS3      | -0.4  |
| hsa-mir-301    | PLXNB1    | 0.4   |
| hsa-mir-301    | REC8      | 0.25  |
| hsa-mir-301    | RNF165    | 0.37  |
| hsa-mir-301    | S100A8    | -0.29 |
| hsa-mir-301    | SALL3     | 0.39  |
| hsa-mir-301    | SCG2      | -0.18 |
| hsa-mir-301    | SEMA3A    | -0.28 |
| hsa-mir-301    | SHD       | 0.41  |
| hsa-mir-301    | SOX4      | 0.38  |
| hsa-mir-301    | STEAP1    | -0.33 |
| hsa-mir-301    | TMEPAI    | -0.35 |
| hsa-mir-301    | TRPV2     | -0.36 |
| hsa-mir-301    | VIPR2     | 0.29  |
| hsa-mir-301    | ZNF711    | 0.45  |
| hsa-mir-301    | ZSWIM5    | 0.39  |
| hsa-mir-30a-3p | ALCAM     | -0.29 |
| hsa-mir-30a-3p | ANKRD50   | -0.3  |
| hsa-mir-30a-3p | C19orf36  | 0.37  |
| hsa-mir-30a-3p | C19orf44  | 0.34  |
| hsa-mir-30a-3p | C4orf19   | 0.38  |
| hsa-mir-30a-3p | C6orf192  | 0.42  |
| hsa-mir-30a-3p | C9orf61   | 0.4   |
| hsa-mir-30a-3p | CDH24     | 0.1   |
| hsa-mir-30a-3p | CST3      | 0.39  |
| hsa-mir-30a-3p | DNAH10    | -0.31 |
| hsa-mir-30a-3p | EGFR      | 0.23  |
| hsa-mir-30a-3p | ELOVL2    | 0.26  |
| hsa-mir-30a-3p | ENPP3     | 0.27  |
| hsa-mir-30a-3p | EYA2      | 0.25  |
| hsa-mir-30a-3p | FGFR3     | 0.32  |
| hsa-mir-30a-3p | GJA1      | 0.37  |
| hsa-mir-30a-3p | HPR       | 0.28  |
| hsa-mir-30a-3p | LCE5A     | 0.11  |

|                |          |       |
|----------------|----------|-------|
| hsa-mir-30a-3p | LFNG     | 0.35  |
| hsa-mir-30a-3p | LPGAT1   | -0.41 |
| hsa-mir-30a-3p | LRRC16   | 0.33  |
| hsa-mir-30a-3p | METTL7A  | 0.33  |
| hsa-mir-30a-3p | MPHOSPH1 | -0.23 |
| hsa-mir-30a-3p | MYO5A    | -0.4  |
| hsa-mir-30a-3p | PLEKHG4  | -0.2  |
| hsa-mir-30a-3p | PON2     | 0.37  |
| hsa-mir-30a-3p | RETSAT   | 0.42  |
| hsa-mir-30a-3p | RNF144A  | -0.38 |
| hsa-mir-30a-3p | SLC1A1   | -0.24 |
| hsa-mir-30a-3p | SLC1A6   | -0.02 |
| hsa-mir-30a-3p | SMOX     | 0.4   |
| hsa-mir-30a-3p | SNTA1    | 0.35  |
| hsa-mir-30a-3p | TBX21    | -0.32 |
| hsa-mir-30a-3p | TMEFF2   | -0.27 |
| hsa-mir-30a-3p | ZFYVE21  | 0.4   |
| hsa-mir-30a-5p | ACOT7    | -0.47 |
| hsa-mir-30a-5p | ACVR2A   | -0.46 |
| hsa-mir-30a-5p | ALDH1L1  | 0.43  |
| hsa-mir-30a-5p | ASPM     | -0.17 |
| hsa-mir-30a-5p | BCKDHB   | 0.39  |
| hsa-mir-30a-5p | BDH2     | 0.42  |
| hsa-mir-30a-5p | BUB1     | -0.05 |
| hsa-mir-30a-5p | C15orf52 | 0.35  |
| hsa-mir-30a-5p | C4orf19  | 0.43  |
| hsa-mir-30a-5p | C6orf192 | 0.46  |
| hsa-mir-30a-5p | C9orf61  | 0.43  |
| hsa-mir-30a-5p | CASC5    | -0.2  |
| hsa-mir-30a-5p | CDC2     | -0.15 |
| hsa-mir-30a-5p | CEP55    | -0.12 |
| hsa-mir-30a-5p | CMBL     | 0.18  |
| hsa-mir-30a-5p | CSRP2    | 0.37  |
| hsa-mir-30a-5p | CST3     | 0.45  |
| hsa-mir-30a-5p | CTHRC1   | -0.25 |
| hsa-mir-30a-5p | DDR1     | 0.45  |
| hsa-mir-30a-5p | DIP2C    | -0.36 |
| hsa-mir-30a-5p | DNASE2   | 0.35  |
| hsa-mir-30a-5p | EDIL3    | -0.44 |
| hsa-mir-30a-5p | ESCO2    | -0.07 |
| hsa-mir-30a-5p | EXPH5    | 0.27  |
| hsa-mir-30a-5p | EYA2     | 0.32  |
| hsa-mir-30a-5p | FAM54A   | -0.1  |
| hsa-mir-30a-5p | FGF2     | 0.36  |
| hsa-mir-30a-5p | GJA1     | 0.43  |
| hsa-mir-30a-5p | GPRIN1   | -0.37 |
| hsa-mir-30a-5p | INHBB    | 0.31  |
| hsa-mir-30a-5p | KIF18A   | -0.1  |
| hsa-mir-30a-5p | LFNG     | 0.46  |
| hsa-mir-30a-5p | LGI1     | 0.31  |
| hsa-mir-30a-5p | LPGAT1   | -0.49 |
| hsa-mir-30a-5p | LRAT     | 0.19  |
| hsa-mir-30a-5p | LTF      | 0.29  |

|                |           |       |
|----------------|-----------|-------|
| hsa-mir-30a-5p | MARVELD3  | 0.37  |
| hsa-mir-30a-5p | MEX3B     | -0.45 |
| hsa-mir-30a-5p | MPHOSPH1  | -0.18 |
| hsa-mir-30a-5p | MT3       | 0.4   |
| hsa-mir-30a-5p | MYO5A     | -0.45 |
| hsa-mir-30a-5p | NR0B1     | -0.37 |
| hsa-mir-30a-5p | PAX6      | 0.29  |
| hsa-mir-30a-5p | PBXIP1    | 0.46  |
| hsa-mir-30a-5p | PLEKHG4   | -0.27 |
| hsa-mir-30a-5p | PON2      | 0.45  |
| hsa-mir-30a-5p | PPP1R13L  | 0.24  |
| hsa-mir-30a-5p | PPP1R1C   | 0.42  |
| hsa-mir-30a-5p | RASAL2    | -0.42 |
| hsa-mir-30a-5p | REEP5     | 0.21  |
| hsa-mir-30a-5p | RETSAT    | 0.41  |
| hsa-mir-30a-5p | RUNX1T1   | -0.22 |
| hsa-mir-30a-5p | SH3KBP1   | -0.35 |
| hsa-mir-30a-5p | SLC1A1    | -0.36 |
| hsa-mir-30a-5p | SLC2A13   | -0.43 |
| hsa-mir-30a-5p | SMO       | 0.43  |
| hsa-mir-30a-5p | SMOX      | 0.45  |
| hsa-mir-30a-5p | STMN1     | -0.38 |
| hsa-mir-30a-5p | SUMF2     | 0.41  |
| hsa-mir-30a-5p | SYT1      | -0.23 |
| hsa-mir-30a-5p | TMEFF2    | -0.39 |
| hsa-mir-30a-5p | TRH       | -0.3  |
| hsa-mir-30a-5p | ZHX3      | 0.47  |
| hsa-mir-30a-5p | ZNF469    | -0.29 |
| hsa-mir-30b    | AOX1      | -0.2  |
| hsa-mir-30b    | C6orf105  | -0.37 |
| hsa-mir-30b    | CFD       | -0.27 |
| hsa-mir-30b    | FOXC1     | 0.14  |
| hsa-mir-30b    | GATA6     | -0.14 |
| hsa-mir-30b    | IER3      | -0.26 |
| hsa-mir-30b    | KCND2     | 0.21  |
| hsa-mir-30b    | LRP4      | 0.38  |
| hsa-mir-30b    | NMNAT3    | 0.09  |
| hsa-mir-30b    | NPAS3     | 0.32  |
| hsa-mir-30b    | POSTN     | -0.18 |
| hsa-mir-30b    | SH2D2A    | -0.36 |
| hsa-mir-30b    | ZNF214    | 0.23  |
| hsa-mir-30c    | ABAT      | 0.4   |
| hsa-mir-30c    | ABCB1     | 0.29  |
| hsa-mir-30c    | ACSBG1    | 0.38  |
| hsa-mir-30c    | ACTG2     | -0.32 |
| hsa-mir-30c    | ACYP2     | 0.41  |
| hsa-mir-30c    | ADAM23    | -0.07 |
| hsa-mir-30c    | AGT       | 0.44  |
| hsa-mir-30c    | AHCYL1    | 0.49  |
| hsa-mir-30c    | ALDH1L1   | 0.44  |
| hsa-mir-30c    | ALDH6A1   | 0.44  |
| hsa-mir-30c    | ALPK2     | -0.32 |
| hsa-mir-30c    | ARHGEF10L | 0.44  |

|             |          |       |
|-------------|----------|-------|
| hsa-mir-30c | ARL8A    | 0.35  |
| hsa-mir-30c | ATP13A4  | 0.41  |
| hsa-mir-30c | ATP1A2   | 0.37  |
| hsa-mir-30c | BAI2     | 0.32  |
| hsa-mir-30c | BBS2     | 0.5   |
| hsa-mir-30c | BCAN     | 0.38  |
| hsa-mir-30c | BDH2     | 0.47  |
| hsa-mir-30c | BMP7     | 0.37  |
| hsa-mir-30c | C18orf51 | 0.4   |
| hsa-mir-30c | C19orf36 | 0.38  |
| hsa-mir-30c | C19orf44 | 0.36  |
| hsa-mir-30c | C4orf19  | 0.41  |
| hsa-mir-30c | C6orf173 | -0.43 |
| hsa-mir-30c | C6orf192 | 0.44  |
| hsa-mir-30c | C9orf61  | 0.51  |
| hsa-mir-30c | CEP55    | -0.29 |
| hsa-mir-30c | CHDH     | 0.41  |
| hsa-mir-30c | CHST10   | 0.44  |
| hsa-mir-30c | COL6A3   | -0.43 |
| hsa-mir-30c | CST3     | 0.43  |
| hsa-mir-30c | CTH      | 0.38  |
| hsa-mir-30c | CTHRC1   | -0.41 |
| hsa-mir-30c | CTNND2   | 0.43  |
| hsa-mir-30c | DCI      | 0.45  |
| hsa-mir-30c | DDAH1    | 0.44  |
| hsa-mir-30c | DDEFL1   | 0.33  |
| hsa-mir-30c | DDR1     | 0.44  |
| hsa-mir-30c | DLEC1    | 0.38  |
| hsa-mir-30c | DTX1     | 0.37  |
| hsa-mir-30c | EDN3     | 0.27  |
| hsa-mir-30c | EDNRB    | 0.41  |
| hsa-mir-30c | EGFL6    | -0.29 |
| hsa-mir-30c | EGFR     | 0.35  |
| hsa-mir-30c | FAM107A  | 0.3   |
| hsa-mir-30c | FGF2     | 0.45  |
| hsa-mir-30c | FGFR3    | 0.42  |
| hsa-mir-30c | FMN2     | 0.42  |
| hsa-mir-30c | GATM     | 0.37  |
| hsa-mir-30c | GJA1     | 0.35  |
| hsa-mir-30c | GLRX3    | -0.29 |
| hsa-mir-30c | GNG7     | 0.3   |
| hsa-mir-30c | GPR56    | 0.42  |
| hsa-mir-30c | GRAMD3   | 0.44  |
| hsa-mir-30c | GSTT1    | 0.03  |
| hsa-mir-30c | HEPACAM  | 0.48  |
| hsa-mir-30c | ID4      | 0.46  |
| hsa-mir-30c | IGSF11   | 0.34  |
| hsa-mir-30c | IL17D    | 0.42  |
| hsa-mir-30c | IL17RB   | 0.43  |
| hsa-mir-30c | JAM2     | 0.4   |
| hsa-mir-30c | KCNJ10   | 0.41  |
| hsa-mir-30c | KCNN3    | 0.39  |
| hsa-mir-30c | KIAA0644 | 0.38  |

|             |           |       |
|-------------|-----------|-------|
| hsa-mir-30c | KIAA0828  | 0.36  |
| hsa-mir-30c | LFNG      | 0.45  |
| hsa-mir-30c | LGI1      | 0.34  |
| hsa-mir-30c | LIFR      | 0.46  |
| hsa-mir-30c | LIX1      | 0.42  |
| hsa-mir-30c | LOC388135 | 0.43  |
| hsa-mir-30c | LPGAT1    | -0.41 |
| hsa-mir-30c | LRIG1     | 0.42  |
| hsa-mir-30c | MASP1     | 0.46  |
| hsa-mir-30c | MATN2     | 0.27  |
| hsa-mir-30c | MBOAT2    | 0.35  |
| hsa-mir-30c | METTL7A   | 0.39  |
| hsa-mir-30c | MFAP2     | -0.36 |
| hsa-mir-30c | MGC13057  | 0.36  |
| hsa-mir-30c | MGC52110  | 0.41  |
| hsa-mir-30c | MLC1      | 0.37  |
| hsa-mir-30c | MOSC2     | 0.35  |
| hsa-mir-30c | MYH7      | 0.28  |
| hsa-mir-30c | MYO10     | 0.39  |
| hsa-mir-30c | NDRG2     | 0.52  |
| hsa-mir-30c | NFIA      | 0.38  |
| hsa-mir-30c | NMB       | 0.38  |
| hsa-mir-30c | NPAS3     | 0.4   |
| hsa-mir-30c | NR2E1     | 0.37  |
| hsa-mir-30c | NR2F1     | 0.34  |
| hsa-mir-30c | OCC-1     | -0.31 |
| hsa-mir-30c | OLIG1     | 0.29  |
| hsa-mir-30c | PAQR6     | 0.37  |
| hsa-mir-30c | PAX6      | 0.4   |
| hsa-mir-30c | PBXIP1    | 0.48  |
| hsa-mir-30c | PHKG1     | 0.41  |
| hsa-mir-30c | PITPNC1   | 0.3   |
| hsa-mir-30c | PMP2      | 0.23  |
| hsa-mir-30c | PON2      | 0.41  |
| hsa-mir-30c | POPDC3    | -0.38 |
| hsa-mir-30c | PPAP2B    | 0.45  |
| hsa-mir-30c | PPARGC1A  | 0.41  |
| hsa-mir-30c | PPP1R1C   | 0.41  |
| hsa-mir-30c | PPP2R5A   | 0.39  |
| hsa-mir-30c | PTN       | 0.22  |
| hsa-mir-30c | PTPRA     | 0.36  |
| hsa-mir-30c | PTPRZ1    | 0.37  |
| hsa-mir-30c | RAGE      | 0.36  |
| hsa-mir-30c | RASA4     | 0.35  |
| hsa-mir-30c | RASGRP2   | 0.39  |
| hsa-mir-30c | RGMA      | 0.52  |
| hsa-mir-30c | RNF180    | 0.33  |
| hsa-mir-30c | SALL2     | 0.51  |
| hsa-mir-30c | SDC3      | 0.31  |
| hsa-mir-30c | SGEF      | 0.41  |
| hsa-mir-30c | SH3KBP1   | -0.37 |
| hsa-mir-30c | SLC15A2   | 0.41  |
| hsa-mir-30c | SLC16A9   | 0.38  |

|                |           |       |
|----------------|-----------|-------|
| hsa-mir-30c    | SLC1A2    | 0.39  |
| hsa-mir-30c    | SLC20A2   | 0.46  |
| hsa-mir-30c    | SLC24A3   | 0.43  |
| hsa-mir-30c    | SLC44A2   | 0.4   |
| hsa-mir-30c    | SLC4A4    | 0.43  |
| hsa-mir-30c    | SLCO1C1   | 0.33  |
| hsa-mir-30c    | SNAI2     | -0.33 |
| hsa-mir-30c    | SOX9      | 0.5   |
| hsa-mir-30c    | SPHK1     | -0.4  |
| hsa-mir-30c    | STK33     | 0.35  |
| hsa-mir-30c    | SUMF2     | 0.39  |
| hsa-mir-30c    | TMEM166   | -0.35 |
| hsa-mir-30c    | TSPAN12   | 0.36  |
| hsa-mir-30c    | TSPAN3    | 0.47  |
| hsa-mir-30c    | TTYH1     | 0.4   |
| hsa-mir-30c    | UCK2      | -0.36 |
| hsa-mir-30c    | VLDLR     | -0.32 |
| hsa-mir-30c    | VSX1      | 0.42  |
| hsa-mir-30c    | WSCD1     | 0.35  |
| hsa-mir-30c    | ZFYVE21   | 0.38  |
| hsa-mir-30c    | ZHX3      | 0.39  |
| hsa-mir-30c    | ZNF219    | 0.29  |
| hsa-mir-30c    | ZNF671    | 0.36  |
| hsa-mir-30d    | ALDH1L1   | 0.25  |
| hsa-mir-30d    | ASTN1     | 0.24  |
| hsa-mir-30d    | C14orf152 | 0.17  |
| hsa-mir-30d    | CTCFL     | -0.22 |
| hsa-mir-30d    | GSG1L     | 0.34  |
| hsa-mir-30d    | HEPACAM   | 0.27  |
| hsa-mir-30d    | ID4       | 0.23  |
| hsa-mir-30d    | KLHDC8A   | 0.27  |
| hsa-mir-30d    | MME       | -0.27 |
| hsa-mir-30d    | MYH7      | 0.16  |
| hsa-mir-30d    | PMP2      | 0.18  |
| hsa-mir-30d    | SEMA3A    | -0.1  |
| hsa-mir-30d    | SPINK5    | -0.24 |
| hsa-mir-30d    | SSPO      | -0.05 |
| hsa-mir-30e-3p | C4orf19   | 0.31  |
| hsa-mir-30e-3p | COL6A3    | -0.42 |
| hsa-mir-30e-3p | EGFL6     | -0.41 |
| hsa-mir-30e-3p | ERBB4     | 0.23  |
| hsa-mir-30e-3p | FAM5C     | 0.2   |
| hsa-mir-30e-3p | HPR       | 0.14  |
| hsa-mir-30e-3p | LRR1Q1    | -0.04 |
| hsa-mir-30e-3p | METTL7A   | 0.26  |
| hsa-mir-30e-3p | PBXIP1    | 0.38  |
| hsa-mir-30e-3p | TNMD      | 0.03  |
| hsa-mir-30e-5p | AHCYL1    | 0.33  |
| hsa-mir-30e-5p | CHDH      | 0.31  |
| hsa-mir-30e-5p | COQ10A    | 0.3   |
| hsa-mir-30e-5p | FLJ21511  | 0.04  |
| hsa-mir-30e-5p | GLT25D2   | 0.15  |
| hsa-mir-30e-5p | IFIT3     | 0.21  |



|                |          |       |
|----------------|----------|-------|
| hsa-mir-30e-5p | LAPTM4B  | -0.23 |
| hsa-mir-30e-5p | PLP1     | 0.04  |
| hsa-mir-30e-5p | POSTN    | -0.2  |
| hsa-mir-30e-5p | PTGIS    | -0.29 |
| hsa-mir-30e-5p | SMOC2    | -0.19 |
| hsa-mir-30e-5p | SUSD5    | -0.04 |
| hsa-mir-30e-5p | TCP1     | -0.26 |
| hsa-mir-30e-5p | TMEM181  | -0.26 |
| hsa-mir-30e-5p | TTK      | -0.29 |
| hsa-mir-31     | ALDH1A3  | 0.31  |
| hsa-mir-31     | BCAR3    | 0.28  |
| hsa-mir-31     | C22orf36 | -0.24 |
| hsa-mir-31     | CDC42EP3 | 0.29  |
| hsa-mir-31     | COL10A1  | 0.3   |
| hsa-mir-31     | CST6     | 0.39  |
| hsa-mir-31     | DCLK2    | -0.24 |
| hsa-mir-31     | DKK1     | 0.41  |
| hsa-mir-31     | DMRTA1   | 0.32  |
| hsa-mir-31     | EFS      | -0.34 |
| hsa-mir-31     | ENPP5    | 0.3   |
| hsa-mir-31     | FAM5B    | -0.05 |
| hsa-mir-31     | FEZ1     | -0.33 |
| hsa-mir-31     | FHL2     | 0.41  |
| hsa-mir-31     | FXVD6    | -0.41 |
| hsa-mir-31     | GLT8D2   | 0.36  |
| hsa-mir-31     | GPC4     | 0.37  |
| hsa-mir-31     | HOXB5    | 0.11  |
| hsa-mir-31     | HOXB6    | 0.18  |
| hsa-mir-31     | IFNE1    | 0.53  |
| hsa-mir-31     | KCNQ2    | -0.44 |
| hsa-mir-31     | KIAA0746 | 0.4   |
| hsa-mir-31     | LHFPL3   | -0.26 |
| hsa-mir-31     | LPPR4    | 0.09  |
| hsa-mir-31     | LTBP1    | 0.38  |
| hsa-mir-31     | MAGI2    | -0.03 |
| hsa-mir-31     | MDFIC    | 0.32  |
| hsa-mir-31     | NHS      | 0.32  |
| hsa-mir-31     | NPAS3    | -0.08 |
| hsa-mir-31     | ODZ2     | 0.29  |
| hsa-mir-31     | PAWR     | 0.4   |
| hsa-mir-31     | POPDC3   | 0.17  |
| hsa-mir-31     | RARRES1  | 0.31  |
| hsa-mir-31     | RNF217   | 0.39  |
| hsa-mir-31     | SEMA3A   | 0.37  |
| hsa-mir-31     | SEMA3C   | 0.17  |
| hsa-mir-31     | SHC2     | -0.25 |
| hsa-mir-31     | SULF1    | 0.32  |
| hsa-mir-31     | TKTL1    | 0.2   |
| hsa-mir-31     | TMEPAI   | 0.33  |
| hsa-mir-31     | TNFSF4   | 0.42  |
| hsa-mir-31     | TPBG     | 0.34  |
| hsa-mir-31     | TTC29    | 0.15  |
| hsa-mir-31     | UBXD3    | 0.29  |

|             |             |       |
|-------------|-------------|-------|
| hsa-mir-32  | AQP9        | -0.3  |
| hsa-mir-32  | C9orf47     | -0.24 |
| hsa-mir-32  | CD86        | -0.27 |
| hsa-mir-32  | CDH18       | 0.03  |
| hsa-mir-32  | DYSF        | -0.18 |
| hsa-mir-32  | FPRL2       | -0.19 |
| hsa-mir-32  | OLIG1       | 0.21  |
| hsa-mir-32  | WNT2        | -0.2  |
| hsa-mir-320 | CALB1       | -0.29 |
| hsa-mir-320 | CDH9        | -0.4  |
| hsa-mir-320 | CNGA3       | 0.23  |
| hsa-mir-320 | CREG2       | -0.31 |
| hsa-mir-320 | FABP6       | -0.24 |
| hsa-mir-320 | GABRG2      | -0.3  |
| hsa-mir-320 | HRNBP3      | -0.3  |
| hsa-mir-320 | LINGO2      | -0.29 |
| hsa-mir-320 | LOC400120   | -0.31 |
| hsa-mir-320 | VSNL1       | -0.36 |
| hsa-mir-323 | ADAM11      | 0.66  |
| hsa-mir-323 | ATP8A2      | 0.62  |
| hsa-mir-323 | C9orf125    | 0.53  |
| hsa-mir-323 | CDH9        | 0.69  |
| hsa-mir-323 | CREG2       | 0.58  |
| hsa-mir-323 | CYP4X1      | 0.65  |
| hsa-mir-323 | DOK6        | 0.55  |
| hsa-mir-323 | FEZF2       | 0.48  |
| hsa-mir-323 | FLJ34047    | 0.59  |
| hsa-mir-323 | GDA         | 0.61  |
| hsa-mir-323 | GREM2       | 0.67  |
| hsa-mir-323 | GRIN2A      | 0.61  |
| hsa-mir-323 | GYG2        | -0.13 |
| hsa-mir-323 | HOOK1       | 0.59  |
| hsa-mir-323 | HRNBP3      | 0.68  |
| hsa-mir-323 | HTR1E       | 0.66  |
| hsa-mir-323 | INA         | 0.56  |
| hsa-mir-323 | KCNJ12      | 0.63  |
| hsa-mir-323 | KCNK1       | 0.57  |
| hsa-mir-323 | KIAA1086    | 0.7   |
| hsa-mir-323 | KLK7        | 0.69  |
| hsa-mir-323 | KRT222P     | 0.66  |
| hsa-mir-323 | LINGO2      | 0.56  |
| hsa-mir-323 | 22NC03-75B3 | 0.67  |
| hsa-mir-323 | LOC400451   | 0.51  |
| hsa-mir-323 | MAL2        | 0.59  |
| hsa-mir-323 | NEURL       | 0.71  |
| hsa-mir-323 | NGEF        | 0.57  |
| hsa-mir-323 | NY-REN-7    | 0.68  |
| hsa-mir-323 | OCA2        | 0.61  |
| hsa-mir-323 | PCLO        | 0.63  |
| hsa-mir-323 | PEG3        | 0.56  |
| hsa-mir-323 | PLAC2       | 0.6   |
| hsa-mir-323 | PNMA3       | 0.63  |
| hsa-mir-323 | PPP2R2C     | 0.59  |

|                |           |       |
|----------------|-----------|-------|
| hsa-mir-323    | PRKCB1    | 0.55  |
| hsa-mir-323    | RHOBTB2   | 0.53  |
| hsa-mir-323    | RIMBP2    | 0.66  |
| hsa-mir-323    | RIMS2     | 0.58  |
| hsa-mir-323    | RTN4RL1   | 0.66  |
| hsa-mir-323    | RYR2      | 0.7   |
| hsa-mir-323    | SH3GL3    | 0.6   |
| hsa-mir-323    | SHANK2    | 0.66  |
| hsa-mir-323    | SLC35F3   | 0.66  |
| hsa-mir-323    | SSTR1     | 0.67  |
| hsa-mir-323    | STXBP6    | 0.58  |
| hsa-mir-323    | SULT4A1   | 0.7   |
| hsa-mir-323    | SYNGR3    | 0.64  |
| hsa-mir-323    | SYT13     | 0.6   |
| hsa-mir-323    | TACSTD1   | 0.5   |
| hsa-mir-323    | TCERG1L   | 0.66  |
| hsa-mir-323    | TNNT2     | 0.65  |
| hsa-mir-323    | TPO       | 0.58  |
| hsa-mir-323    | VSNL1     | 0.54  |
| hsa-mir-323    | WBSCR17   | 0.59  |
| hsa-mir-323    | ZMAT4     | 0.51  |
| hsa-mir-324-3p | BACE1     | -0.04 |
| hsa-mir-324-3p | C6orf211  | 0.36  |
| hsa-mir-324-3p | CHST12    | -0.14 |
| hsa-mir-324-3p | DOK6      | -0.19 |
| hsa-mir-324-3p | EDN3      | -0.19 |
| hsa-mir-324-3p | FBXO22    | 0.34  |
| hsa-mir-324-3p | GBAS      | 0.03  |
| hsa-mir-324-3p | HES5      | -0.14 |
| hsa-mir-324-3p | LOC285382 | -0.09 |
| hsa-mir-324-3p | MRS2L     | 0.28  |
| hsa-mir-324-3p | NAP5      | -0.25 |
| hsa-mir-324-3p | NPAS3     | -0.14 |
| hsa-mir-324-3p | RNASE2    | 0.22  |
| hsa-mir-324-3p | SLC35F1   | -0.02 |
| hsa-mir-324-3p | SNAP23    | 0.27  |
| hsa-mir-324-3p | STX7      | 0.29  |
| hsa-mir-324-3p | THBS4     | -0.04 |
| hsa-mir-324-3p | TMEM117   | 0.16  |
| hsa-mir-324-3p | TFSM      | -0.18 |
| hsa-mir-324-3p | XRCC6BP1  | -0.13 |
| hsa-mir-324-5p | ARPC1B    | -0.4  |
| hsa-mir-324-5p | ATOH7     | 0.39  |
| hsa-mir-324-5p | ATP6V1G2  | 0.47  |
| hsa-mir-324-5p | C19orf10  | -0.4  |
| hsa-mir-324-5p | C2orf12   | -0.49 |
| hsa-mir-324-5p | C2orf59   | -0.47 |
| hsa-mir-324-5p | CDH18     | 0.22  |
| hsa-mir-324-5p | CRYM      | 0.2   |
| hsa-mir-324-5p | ERBB4     | 0.4   |
| hsa-mir-324-5p | FGF12     | 0.36  |
| hsa-mir-324-5p | FKBP11    | -0.46 |
| hsa-mir-324-5p | ISG20L1   | -0.37 |

|                |           |       |
|----------------|-----------|-------|
| hsa-mir-324-5p | JPH3      | 0.29  |
| hsa-mir-324-5p | MAPT      | 0.47  |
| hsa-mir-324-5p | MCF2      | 0.35  |
| hsa-mir-324-5p | MXI1      | 0.33  |
| hsa-mir-324-5p | NRXN1     | 0.49  |
| hsa-mir-324-5p | PLAUR     | -0.39 |
| hsa-mir-324-5p | SLC24A6   | -0.34 |
| hsa-mir-324-5p | SPTAN1    | 0.37  |
| hsa-mir-324-5p | SRPK2     | 0.45  |
| hsa-mir-324-5p | SSTR1     | 0.21  |
| hsa-mir-324-5p | ST6GAL2   | 0.47  |
| hsa-mir-324-5p | TAGLN2    | -0.45 |
| hsa-mir-324-5p | TERF2     | 0.47  |
| hsa-mir-324-5p | TRIM37    | 0.56  |
| hsa-mir-324-5p | ZNF179    | 0.31  |
| hsa-mir-328    | ANGPTL4   | -0.24 |
| hsa-mir-328    | CISH      | -0.24 |
| hsa-mir-328    | COL1A1    | -0.33 |
| hsa-mir-328    | GPR158    | 0.25  |
| hsa-mir-328    | JDP2      | -0.12 |
| hsa-mir-328    | LIPA      | -0.03 |
| hsa-mir-328    | LUZP2     | 0.16  |
| hsa-mir-328    | TFAP2D    | 0.03  |
| hsa-mir-33     | A2M       | -0.39 |
| hsa-mir-33     | ABCC3     | -0.47 |
| hsa-mir-33     | ACP5      | -0.42 |
| hsa-mir-33     | ADAM8     | -0.43 |
| hsa-mir-33     | ALPK1     | -0.47 |
| hsa-mir-33     | AMICA1    | -0.49 |
| hsa-mir-33     | ANGPTL4   | -0.37 |
| hsa-mir-33     | ANXA1     | -0.44 |
| hsa-mir-33     | APOC1     | -0.39 |
| hsa-mir-33     | AREG      | -0.35 |
| hsa-mir-33     | BATF      | -0.51 |
| hsa-mir-33     | BRSK2     | 0.48  |
| hsa-mir-33     | C1orf38   | -0.44 |
| hsa-mir-33     | C2        | -0.45 |
| hsa-mir-33     | C22orf32  | 0.43  |
| hsa-mir-33     | CAMSAP1L1 | 0.43  |
| hsa-mir-33     | CAPG      | -0.48 |
| hsa-mir-33     | CAST      | -0.48 |
| hsa-mir-33     | CCR7      | -0.43 |
| hsa-mir-33     | CD2       | -0.4  |
| hsa-mir-33     | CD300A    | -0.44 |
| hsa-mir-33     | CD86      | -0.41 |
| hsa-mir-33     | CFD       | -0.45 |
| hsa-mir-33     | COL1A1    | -0.44 |
| hsa-mir-33     | CYBB      | -0.44 |
| hsa-mir-33     | DAB2      | -0.5  |
| hsa-mir-33     | DUSP1     | -0.4  |
| hsa-mir-33     | ECGF1     | -0.49 |
| hsa-mir-33     | FCGR2A    | -0.41 |
| hsa-mir-33     | FDFT1     | 0.5   |

|             |          |       |
|-------------|----------|-------|
| hsa-mir-33  | GAA      | -0.43 |
| hsa-mir-33  | GCNT1    | -0.43 |
| hsa-mir-33  | GLRX     | -0.32 |
| hsa-mir-33  | GPNMB    | -0.42 |
| hsa-mir-33  | GRN      | -0.44 |
| hsa-mir-33  | HAVCR2   | -0.42 |
| hsa-mir-33  | HMGCS1   | 0.48  |
| hsa-mir-33  | HMOX1    | -0.39 |
| hsa-mir-33  | HPS3     | -0.46 |
| hsa-mir-33  | ICAM1    | -0.48 |
| hsa-mir-33  | IER3     | -0.39 |
| hsa-mir-33  | IGHM     | -0.34 |
| hsa-mir-33  | IL4I1    | -0.44 |
| hsa-mir-33  | IL6      | -0.38 |
| hsa-mir-33  | LDOC1L   | 0.37  |
| hsa-mir-33  | LY96     | -0.5  |
| hsa-mir-33  | MAFB     | -0.46 |
| hsa-mir-33  | MBOAT1   | -0.39 |
| hsa-mir-33  | MMP10    | -0.28 |
| hsa-mir-33  | MMP7     | -0.48 |
| hsa-mir-33  | MR1      | -0.47 |
| hsa-mir-33  | MS4A4A   | -0.46 |
| hsa-mir-33  | MS4A6A   | -0.45 |
| hsa-mir-33  | MVP      | -0.52 |
| hsa-mir-33  | NPC2     | -0.48 |
| hsa-mir-33  | NPL      | -0.39 |
| hsa-mir-33  | NUDT11   | 0.44  |
| hsa-mir-33  | PLAU     | -0.48 |
| hsa-mir-33  | PLAUR    | -0.48 |
| hsa-mir-33  | PLEKHQ1  | -0.44 |
| hsa-mir-33  | PLK3     | -0.44 |
| hsa-mir-33  | PLTP     | -0.43 |
| hsa-mir-33  | POLD4    | -0.45 |
| hsa-mir-33  | RGS1     | -0.4  |
| hsa-mir-33  | RNASE6   | -0.37 |
| hsa-mir-33  | S100A4   | -0.47 |
| hsa-mir-33  | SERPINE1 | -0.42 |
| hsa-mir-33  | SLC15A3  | -0.46 |
| hsa-mir-33  | SLC37A2  | -0.43 |
| hsa-mir-33  | SLITRK4  | 0.38  |
| hsa-mir-33  | SOD2     | -0.43 |
| hsa-mir-33  | SQLE     | 0.44  |
| hsa-mir-33  | SRGN     | -0.4  |
| hsa-mir-33  | ST14     | -0.47 |
| hsa-mir-33  | TBC1D10C | -0.44 |
| hsa-mir-33  | TCIRG1   | -0.51 |
| hsa-mir-33  | TLR2     | -0.41 |
| hsa-mir-33  | TNFAIP3  | -0.46 |
| hsa-mir-33  | VDR      | -0.51 |
| hsa-mir-33  | VMO1     | -0.45 |
| hsa-mir-330 | AATK     | 0.71  |
| hsa-mir-330 | ABHD12B  | 0.59  |
| hsa-mir-330 | AK5      | 0.7   |

|             |          |      |
|-------------|----------|------|
| hsa-mir-330 | ATP6V1E1 | 0.44 |
| hsa-mir-330 | BOK      | 0.6  |
| hsa-mir-330 | C11orf9  | 0.62 |
| hsa-mir-330 | C20orf39 | 0.45 |
| hsa-mir-330 | C22orf9  | 0.54 |
| hsa-mir-330 | C7orf41  | 0.63 |
| hsa-mir-330 | C9orf164 | 0.66 |
| hsa-mir-330 | CCDC85A  | 0.59 |
| hsa-mir-330 | CDC42EP2 | 0.58 |
| hsa-mir-330 | CLCA4    | 0.65 |
| hsa-mir-330 | CNP      | 0.55 |
| hsa-mir-330 | CNTNAP2  | 0.62 |
| hsa-mir-330 | CNTNAP4  | 0.67 |
| hsa-mir-330 | CRYM     | 0.51 |
| hsa-mir-330 | DBNDD2   | 0.64 |
| hsa-mir-330 | DDN      | 0.7  |
| hsa-mir-330 | EDG8     | 0.7  |
| hsa-mir-330 | EDIL3    | 0.56 |
| hsa-mir-330 | EFHA2    | 0.6  |
| hsa-mir-330 | ENPP2    | 0.58 |
| hsa-mir-330 | EPHB6    | 0.68 |
| hsa-mir-330 | FA2H     | 0.62 |
| hsa-mir-330 | FAM19A4  | 0.66 |
| hsa-mir-330 | FBXO2    | 0.63 |
| hsa-mir-330 | FGFR2    | 0.54 |
| hsa-mir-330 | FLJ37464 | 0.7  |
| hsa-mir-330 | FOLH1    | 0.53 |
| hsa-mir-330 | GFOD1    | 0.56 |
| hsa-mir-330 | GJA12    | 0.68 |
| hsa-mir-330 | GPR62    | 0.61 |
| hsa-mir-330 | HHATL    | 0.63 |
| hsa-mir-330 | KCNK1    | 0.61 |
| hsa-mir-330 | KIAA0748 | 0.7  |
| hsa-mir-330 | KIAA0774 | 0.66 |
| hsa-mir-330 | KIAA1189 | 0.6  |
| hsa-mir-330 | KIAA1394 | 0.71 |
| hsa-mir-330 | KIAA1598 | 0.62 |
| hsa-mir-330 | KLHL2    | 0.57 |
| hsa-mir-330 | KLK6     | 0.62 |
| hsa-mir-330 | LANCL1   | 0.61 |
| hsa-mir-330 | LDB3     | 0.74 |
| hsa-mir-330 | LGI3     | 0.68 |
| hsa-mir-330 | LHPP     | 0.68 |
| hsa-mir-330 | LIPE     | 0.58 |
| hsa-mir-330 | MAG      | 0.59 |
| hsa-mir-330 | MAL      | 0.73 |
| hsa-mir-330 | MAP6D1   | 0.58 |
| hsa-mir-330 | MAP7     | 0.6  |
| hsa-mir-330 | MBP      | 0.63 |
| hsa-mir-330 | MOBP     | 0.67 |
| hsa-mir-330 | NEURL    | 0.68 |
| hsa-mir-330 | NINJ2    | 0.62 |
| hsa-mir-330 | NRGN     | 0.52 |

|             |          |       |
|-------------|----------|-------|
| hsa-mir-330 | OR2L13   | 0.66  |
| hsa-mir-330 | PCSK6    | 0.53  |
| hsa-mir-330 | PDIA2    | 0.63  |
| hsa-mir-330 | PEX5L    | 0.75  |
| hsa-mir-330 | PIP4K2A  | 0.61  |
| hsa-mir-330 | PLEKHH1  | 0.57  |
| hsa-mir-330 | PLP1     | 0.6   |
| hsa-mir-330 | PNCK     | 0.7   |
| hsa-mir-330 | PPP1R14A | 0.58  |
| hsa-mir-330 | PPP1R16B | 0.7   |
| hsa-mir-330 | PRKCB1   | 0.59  |
| hsa-mir-330 | PXK      | 0.49  |
| hsa-mir-330 | QDPR     | 0.68  |
| hsa-mir-330 | RAB40B   | 0.72  |
| hsa-mir-330 | RASAL1   | 0.68  |
| hsa-mir-330 | RASGEF1A | 0.51  |
| hsa-mir-330 | RASGRF1  | 0.7   |
| hsa-mir-330 | RBM11    | 0.71  |
| hsa-mir-330 | RBP7     | 0.51  |
| hsa-mir-330 | REPS2    | 0.61  |
| hsa-mir-330 | RICH2    | 0.65  |
| hsa-mir-330 | RYR2     | 0.69  |
| hsa-mir-330 | SEC14L5  | 0.73  |
| hsa-mir-330 | SEMA4D   | 0.58  |
| hsa-mir-330 | SH3GL3   | 0.72  |
| hsa-mir-330 | SH3TC2   | 0.57  |
| hsa-mir-330 | SLC35F3  | 0.71  |
| hsa-mir-330 | SLC5A11  | 0.65  |
| hsa-mir-330 | SMPX     | 0.65  |
| hsa-mir-330 | SNCA     | 0.7   |
| hsa-mir-330 | SPOCK3   | 0.64  |
| hsa-mir-330 | STAR     | 0.59  |
| hsa-mir-330 | STXBP6   | 0.63  |
| hsa-mir-330 | STYK1    | 0.64  |
| hsa-mir-330 | SV2B     | 0.5   |
| hsa-mir-330 | TF       | 0.66  |
| hsa-mir-330 | TLL2     | 0.64  |
| hsa-mir-330 | TMCC2    | 0.67  |
| hsa-mir-330 | TMEM10   | 0.72  |
| hsa-mir-330 | TMEM125  | 0.71  |
| hsa-mir-330 | TMEM144  | 0.58  |
| hsa-mir-330 | USH1C    | 0.44  |
| hsa-mir-330 | VSNL1    | 0.48  |
| hsa-mir-331 | ANKRD46  | 0.45  |
| hsa-mir-331 | CAMKV    | 0.41  |
| hsa-mir-331 | FBXL16   | 0.4   |
| hsa-mir-331 | ITGA4    | -0.32 |
| hsa-mir-331 | KCTD1    | 0.44  |
| hsa-mir-331 | KIAA0319 | 0.27  |
| hsa-mir-331 | LRTM2    | 0.38  |
| hsa-mir-331 | MORC4    | -0.38 |
| hsa-mir-331 | NAP1L3   | 0.41  |
| hsa-mir-331 | NKIRAS1  | 0.4   |

|             |           |       |
|-------------|-----------|-------|
| hsa-mir-331 | PPP1R3B   | -0.41 |
| hsa-mir-331 | SH3GL2    | 0.36  |
| hsa-mir-331 | SLITRK4   | 0.29  |
| hsa-mir-331 | STOX2     | 0.36  |
| hsa-mir-331 | STXBP5L   | 0.32  |
| hsa-mir-331 | SYNPR     | 0.34  |
| hsa-mir-331 | TBC1D9    | 0.17  |
| hsa-mir-331 | TSPYL4    | 0.43  |
| hsa-mir-335 | ARL8A     | 0.31  |
| hsa-mir-335 | ARMC4     | 0.04  |
| hsa-mir-335 | BMP5      | -0.17 |
| hsa-mir-335 | BUB1      | -0.1  |
| hsa-mir-335 | C10orf63  | 0.28  |
| hsa-mir-335 | C7orf29   | 0.03  |
| hsa-mir-335 | CPXM2     | -0.01 |
| hsa-mir-335 | FA2H      | -0.1  |
| hsa-mir-335 | GLRX3     | -0.3  |
| hsa-mir-335 | GLYATL1   | -0.18 |
| hsa-mir-335 | GULP1     | -0.13 |
| hsa-mir-335 | HEPACAM   | 0.32  |
| hsa-mir-335 | HOXB9     | -0.19 |
| hsa-mir-335 | KCNIP1    | 0.33  |
| hsa-mir-335 | KRBA1     | 0.27  |
| hsa-mir-335 | KRTAP1-5  | -0.17 |
| hsa-mir-335 | LOC644186 | 0.24  |
| hsa-mir-335 | MEST      | 0.55  |
| hsa-mir-335 | NPAS3     | 0.26  |
| hsa-mir-335 | POPDC3    | -0.15 |
| hsa-mir-335 | PRSS35    | -0.1  |
| hsa-mir-335 | SFRP1     | -0.18 |
| hsa-mir-335 | SLC6A15   | -0.22 |
| hsa-mir-335 | TNN       | 0.23  |
| hsa-mir-335 | WSCD1     | 0.25  |
| hsa-mir-338 | Sept4     | 0.55  |
| hsa-mir-338 | A2BP1     | 0.54  |
| hsa-mir-338 | AATK      | 0.78  |
| hsa-mir-338 | ABCA2     | 0.55  |
| hsa-mir-338 | ABCA9     | 0.06  |
| hsa-mir-338 | ABHD12B   | 0.52  |
| hsa-mir-338 | ABHD6     | 0.52  |
| hsa-mir-338 | ACTN2     | 0.24  |
| hsa-mir-338 | ACVR1C    | 0.46  |
| hsa-mir-338 | ADAM12    | -0.47 |
| hsa-mir-338 | ADARB2    | 0.66  |
| hsa-mir-338 | ADRA2C    | 0.53  |
| hsa-mir-338 | AGPAT4    | 0.5   |
| hsa-mir-338 | AGTPBP1   | 0.47  |
| hsa-mir-338 | AGXT2L1   | 0.41  |
| hsa-mir-338 | AK5       | 0.69  |
| hsa-mir-338 | ALCAM     | 0.43  |
| hsa-mir-338 | ALDOC     | 0.47  |
| hsa-mir-338 | AMOTL2    | 0.48  |
| hsa-mir-338 | ANK3      | 0.57  |



|             |           |       |
|-------------|-----------|-------|
| hsa-mir-338 | ANKRD38   | 0.39  |
| hsa-mir-338 | ANKRD43   | 0.48  |
| hsa-mir-338 | ANKS1B    | 0.61  |
| hsa-mir-338 | ANLN      | 0.49  |
| hsa-mir-338 | ANXA5     | -0.46 |
| hsa-mir-338 | APLP1     | 0.49  |
| hsa-mir-338 | ARHGAP29  | -0.3  |
| hsa-mir-338 | ARHGDIG   | 0.61  |
| hsa-mir-338 | ARHGEF7   | 0.6   |
| hsa-mir-338 | ARPP-21   | 0.51  |
| hsa-mir-338 | ASPA      | 0.42  |
| hsa-mir-338 | ASPHD1    | 0.43  |
| hsa-mir-338 | ATCAY     | 0.53  |
| hsa-mir-338 | ATP10B    | 0.5   |
| hsa-mir-338 | ATP1B1    | 0.51  |
| hsa-mir-338 | ATP6V0A1  | 0.49  |
| hsa-mir-338 | ATP6V0A4  | 0.47  |
| hsa-mir-338 | ATP6V1G2  | 0.57  |
| hsa-mir-338 | ATP8A2    | 0.54  |
| hsa-mir-338 | ATRNL1    | 0.51  |
| hsa-mir-338 | AVPI1     | 0.49  |
| hsa-mir-338 | B3GAT1    | 0.49  |
| hsa-mir-338 | B3GNT5    | -0.43 |
| hsa-mir-338 | BAMBI     | 0.37  |
| hsa-mir-338 | BASP1     | 0.56  |
| hsa-mir-338 | BCAP29    | -0.51 |
| hsa-mir-338 | BCAS1     | 0.76  |
| hsa-mir-338 | BCL2L12   | -0.53 |
| hsa-mir-338 | BEST1     | 0.48  |
| hsa-mir-338 | BEX2      | 0.5   |
| hsa-mir-338 | BEX4      | 0.5   |
| hsa-mir-338 | BEX5      | 0.5   |
| hsa-mir-338 | BOK       | 0.6   |
| hsa-mir-338 | BRUNOL4   | 0.56  |
| hsa-mir-338 | BRUNOL5   | 0.55  |
| hsa-mir-338 | BSN       | 0.57  |
| hsa-mir-338 | BTBD16    | 0.45  |
| hsa-mir-338 | BZRAP1    | 0.47  |
| hsa-mir-338 | C10orf109 | 0.53  |
| hsa-mir-338 | C10orf116 | 0.29  |
| hsa-mir-338 | C10orf38  | 0.57  |
| hsa-mir-338 | C11orf41  | 0.42  |
| hsa-mir-338 | C11orf9   | 0.77  |
| hsa-mir-338 | C12orf34  | 0.53  |
| hsa-mir-338 | C14orf128 | 0.49  |
| hsa-mir-338 | C14orf132 | 0.43  |
| hsa-mir-338 | C15orf27  | 0.38  |
| hsa-mir-338 | C1orf75   | 0.4   |
| hsa-mir-338 | C1QL3     | 0.48  |
| hsa-mir-338 | C1QTNF4   | 0.55  |
| hsa-mir-338 | C20orf39  | 0.51  |
| hsa-mir-338 | C20orf58  | 0.35  |
| hsa-mir-338 | C22orf27  | 0.45  |

|             |          |       |
|-------------|----------|-------|
| hsa-mir-338 | C2orf32  | 0.5   |
| hsa-mir-338 | C5orf28  | -0.34 |
| hsa-mir-338 | C5orf30  | 0.44  |
| hsa-mir-338 | C6orf114 | 0.51  |
| hsa-mir-338 | C6orf159 | 0.51  |
| hsa-mir-338 | C7orf41  | 0.69  |
| hsa-mir-338 | C9orf125 | 0.59  |
| hsa-mir-338 | C9orf164 | 0.71  |
| hsa-mir-338 | C9orf45  | 0.51  |
| hsa-mir-338 | C9orf58  | 0.37  |
| hsa-mir-338 | CA10     | 0.54  |
| hsa-mir-338 | CA3      | -0.24 |
| hsa-mir-338 | CABP1    | 0.6   |
| hsa-mir-338 | CACNA2D2 | 0.39  |
| hsa-mir-338 | CADM2    | 0.32  |
| hsa-mir-338 | CALN1    | 0.57  |
| hsa-mir-338 | CAMKV    | 0.64  |
| hsa-mir-338 | CAPN3    | 0.67  |
| hsa-mir-338 | CBFA2T3  | 0.48  |
| hsa-mir-338 | CBLN2    | 0.53  |
| hsa-mir-338 | CCDC109B | -0.48 |
| hsa-mir-338 | CCDC85A  | 0.55  |
| hsa-mir-338 | CCK      | 0.5   |
| hsa-mir-338 | CCKBR    | 0.59  |
| hsa-mir-338 | CD200    | 0.53  |
| hsa-mir-338 | CDC42EP2 | 0.51  |
| hsa-mir-338 | CDH12    | 0.54  |
| hsa-mir-338 | CDH13    | 0.46  |
| hsa-mir-338 | CDH18    | 0.61  |
| hsa-mir-338 | CDH19    | 0.41  |
| hsa-mir-338 | CDH22    | 0.5   |
| hsa-mir-338 | CDH8     | 0.55  |
| hsa-mir-338 | CDH9     | 0.55  |
| hsa-mir-338 | CDKN1C   | 0.56  |
| hsa-mir-338 | CDR1     | 0.6   |
| hsa-mir-338 | CENTA1   | 0.63  |
| hsa-mir-338 | CENTD3   | -0.42 |
| hsa-mir-338 | CENTG1   | 0.36  |
| hsa-mir-338 | CHGB     | 0.45  |
| hsa-mir-338 | CISD1    | 0.41  |
| hsa-mir-338 | CIT      | 0.5   |
| hsa-mir-338 | CITED1   | -0.17 |
| hsa-mir-338 | CKMT1A   | 0.6   |
| hsa-mir-338 | CLASP2   | 0.55  |
| hsa-mir-338 | CLCA4    | 0.67  |
| hsa-mir-338 | CLDN11   | 0.61  |
| hsa-mir-338 | CLDND1   | 0.55  |
| hsa-mir-338 | CLMN     | 0.33  |
| hsa-mir-338 | CLN8     | 0.45  |
| hsa-mir-338 | CMTM5    | 0.44  |
| hsa-mir-338 | CNDP1    | 0.61  |
| hsa-mir-338 | CNKSR2   | 0.53  |
| hsa-mir-338 | CNP      | 0.69  |

|             |         |       |
|-------------|---------|-------|
| hsa-mir-338 | CNTN2   | 0.54  |
| hsa-mir-338 | CNTN4   | 0.49  |
| hsa-mir-338 | CNTNAP2 | 0.51  |
| hsa-mir-338 | CNTNAP4 | 0.76  |
| hsa-mir-338 | COL5A2  | -0.45 |
| hsa-mir-338 | CORO6   | 0.49  |
| hsa-mir-338 | CP110   | 0.36  |
| hsa-mir-338 | CPAMD8  | 0.35  |
| hsa-mir-338 | CPEB3   | 0.6   |
| hsa-mir-338 | CPLX1   | 0.48  |
| hsa-mir-338 | CPLX2   | 0.57  |
| hsa-mir-338 | CPNE4   | -0.04 |
| hsa-mir-338 | CPXM2   | 0.21  |
| hsa-mir-338 | CREG2   | 0.51  |
| hsa-mir-338 | CRHBP   | 0.61  |
| hsa-mir-338 | CRLF1   | 0.23  |
| hsa-mir-338 | CRTAC1  | 0.54  |
| hsa-mir-338 | CRYGB   | 0.47  |
| hsa-mir-338 | CRYZ    | -0.42 |
| hsa-mir-338 | CSMD3   | 0.5   |
| hsa-mir-338 | CTNNA3  | 0.39  |
| hsa-mir-338 | CTTNBP2 | 0.39  |
| hsa-mir-338 | CUTL2   | 0.55  |
| hsa-mir-338 | CYFIP2  | 0.57  |
| hsa-mir-338 | CYP26B1 | 0.39  |
| hsa-mir-338 | CYP4X1  | 0.57  |
| hsa-mir-338 | CYP7B1  | 0.3   |
| hsa-mir-338 | DAAM2   | 0.44  |
| hsa-mir-338 | DACH2   | 0.63  |
| hsa-mir-338 | DACT2   | 0.33  |
| hsa-mir-338 | DACT3   | 0.56  |
| hsa-mir-338 | DBC1    | 0.5   |
| hsa-mir-338 | DBNDD2  | 0.67  |
| hsa-mir-338 | DDX25   | 0.42  |
| hsa-mir-338 | DLEU7   | 0.5   |
| hsa-mir-338 | DLG2    | 0.51  |
| hsa-mir-338 | DMRT2   | 0.41  |
| hsa-mir-338 | DNAJC12 | 0.52  |
| hsa-mir-338 | DNAJC6  | 0.57  |
| hsa-mir-338 | DNM1    | 0.48  |
| hsa-mir-338 | DNM3    | 0.57  |
| hsa-mir-338 | DOCK3   | 0.49  |
| hsa-mir-338 | DOCK9   | 0.46  |
| hsa-mir-338 | DOK6    | 0.55  |
| hsa-mir-338 | DPP10   | 0.5   |
| hsa-mir-338 | DSCAML1 | 0.57  |
| hsa-mir-338 | DUSP26  | 0.54  |
| hsa-mir-338 | DUSP8   | 0.49  |
| hsa-mir-338 | DYNC111 | 0.57  |
| hsa-mir-338 | EDG8    | 0.72  |
| hsa-mir-338 | EDIL3   | 0.53  |
| hsa-mir-338 | EFHA2   | 0.54  |
| hsa-mir-338 | EFHD1   | 0.44  |

|             |          |       |
|-------------|----------|-------|
| hsa-mir-338 | EGFR     | -0.34 |
| hsa-mir-338 | EHD3     | 0.55  |
| hsa-mir-338 | EIF1B    | 0.32  |
| hsa-mir-338 | ELMO1    | 0.49  |
| hsa-mir-338 | ENOX1    | 0.33  |
| hsa-mir-338 | ENPP2    | 0.57  |
| hsa-mir-338 | ENPP4    | 0.39  |
| hsa-mir-338 | ENPP5    | 0.24  |
| hsa-mir-338 | EPB41L1  | 0.51  |
| hsa-mir-338 | EPB41L3  | 0.46  |
| hsa-mir-338 | EPHA10   | 0.58  |
| hsa-mir-338 | ERBB3    | 0.58  |
| hsa-mir-338 | ERC2     | 0.58  |
| hsa-mir-338 | EVC      | -0.44 |
| hsa-mir-338 | EXTL1    | 0.62  |
| hsa-mir-338 | F2R      | -0.52 |
| hsa-mir-338 | FA2H     | 0.79  |
| hsa-mir-338 | FAM101A  | 0.32  |
| hsa-mir-338 | FAM107B  | 0.57  |
| hsa-mir-338 | FAM125B  | 0.37  |
| hsa-mir-338 | FAM133A  | 0.44  |
| hsa-mir-338 | FAM19A2  | 0.5   |
| hsa-mir-338 | FAM19A4  | 0.64  |
| hsa-mir-338 | FAM19A5  | 0.48  |
| hsa-mir-338 | FAM38B   | 0.38  |
| hsa-mir-338 | FAM57B   | 0.5   |
| hsa-mir-338 | FAM77C   | 0.56  |
| hsa-mir-338 | FBXL16   | 0.65  |
| hsa-mir-338 | FBXL2    | 0.41  |
| hsa-mir-338 | FBXO2    | 0.63  |
| hsa-mir-338 | FBXO41   | 0.52  |
| hsa-mir-338 | FCHO1    | 0.56  |
| hsa-mir-338 | FCRLA    | 0.33  |
| hsa-mir-338 | FEZF2    | 0.45  |
| hsa-mir-338 | FGF12    | 0.48  |
| hsa-mir-338 | FGF13    | 0.56  |
| hsa-mir-338 | FGF9     | 0.54  |
| hsa-mir-338 | FGFR2    | 0.55  |
| hsa-mir-338 | FLJ20160 | 0.45  |
| hsa-mir-338 | FLJ20489 | 0.51  |
| hsa-mir-338 | FLJ37464 | 0.57  |
| hsa-mir-338 | FLJ40142 | 0.49  |
| hsa-mir-338 | FNDC5    | 0.42  |
| hsa-mir-338 | FOLH1    | 0.54  |
| hsa-mir-338 | FSTL1    | -0.45 |
| hsa-mir-338 | FSTL5    | 0.5   |
| hsa-mir-338 | FUT8     | 0.19  |
| hsa-mir-338 | FUT9     | 0.44  |
| hsa-mir-338 | FZD7     | -0.47 |
| hsa-mir-338 | GABRA2   | 0.41  |
| hsa-mir-338 | GABRA5   | 0.47  |
| hsa-mir-338 | GABRB3   | 0.5   |
| hsa-mir-338 | GABRG1   | 0.51  |

|             |          |       |
|-------------|----------|-------|
| hsa-mir-338 | GABRG2   | 0.54  |
| hsa-mir-338 | GAL3ST1  | 0.73  |
| hsa-mir-338 | GALNT13  | 0.47  |
| hsa-mir-338 | GALNTL5  | 0.53  |
| hsa-mir-338 | GBP5     | -0.42 |
| hsa-mir-338 | GDF10    | 0.42  |
| hsa-mir-338 | GDPD2    | -0.23 |
| hsa-mir-338 | GFOD1    | 0.57  |
| hsa-mir-338 | GJA12    | 0.71  |
| hsa-mir-338 | GJB1     | 0.71  |
| hsa-mir-338 | GLI2     | -0.43 |
| hsa-mir-338 | GLS2     | 0.52  |
| hsa-mir-338 | GLT1D1   | 0.56  |
| hsa-mir-338 | GNAI1    | 0.59  |
| hsa-mir-338 | GNG3     | 0.47  |
| hsa-mir-338 | GPC4     | -0.28 |
| hsa-mir-338 | GPD1     | 0.4   |
| hsa-mir-338 | GPR17    | 0.46  |
| hsa-mir-338 | GPR22    | 0.54  |
| hsa-mir-338 | GPR62    | 0.63  |
| hsa-mir-338 | GPRASP1  | 0.33  |
| hsa-mir-338 | GREM1    | 0.56  |
| hsa-mir-338 | GRID1    | 0.38  |
| hsa-mir-338 | GRM3     | 0.5   |
| hsa-mir-338 | GUCA2B   | 0.52  |
| hsa-mir-338 | HAPLN2   | 0.7   |
| hsa-mir-338 | HCN1     | 0.53  |
| hsa-mir-338 | HHATL    | 0.68  |
| hsa-mir-338 | HHIP     | 0.38  |
| hsa-mir-338 | HIST1H1D | -0.38 |
| hsa-mir-338 | HIST1H4K | -0.27 |
| hsa-mir-338 | HMGCLL1  | 0.44  |
| hsa-mir-338 | HOXA13   | 0.03  |
| hsa-mir-338 | HOXB3    | -0.41 |
| hsa-mir-338 | HOXD1    | 0.64  |
| hsa-mir-338 | HPCAL4   | 0.53  |
| hsa-mir-338 | HR       | 0.53  |
| hsa-mir-338 | HS3ST3A1 | -0.37 |
| hsa-mir-338 | HS3ST4   | 0.6   |
| hsa-mir-338 | HS3ST5   | 0.44  |
| hsa-mir-338 | HS6ST3   | 0.46  |
| hsa-mir-338 | HSPA12A  | 0.66  |
| hsa-mir-338 | HSPB3    | 0.5   |
| hsa-mir-338 | HTR5A    | 0.55  |
| hsa-mir-338 | HUS1     | -0.44 |
| hsa-mir-338 | IGSF21   | 0.47  |
| hsa-mir-338 | IHPK3    | 0.18  |
| hsa-mir-338 | IL13RA2  | -0.08 |
| hsa-mir-338 | IL1RAPL1 | 0.68  |
| hsa-mir-338 | INA      | 0.59  |
| hsa-mir-338 | INPP5A   | 0.52  |
| hsa-mir-338 | INPP5F   | 0.52  |
| hsa-mir-338 | INSM2    | 0.41  |

|             |           |       |
|-------------|-----------|-------|
| hsa-mir-338 | JAKMIP1   | 0.56  |
| hsa-mir-338 | JPH3      | 0.64  |
| hsa-mir-338 | JUB       | -0.52 |
| hsa-mir-338 | KCNA4     | 0.47  |
| hsa-mir-338 | KCNA5     | 0.41  |
| hsa-mir-338 | KCNB1     | 0.5   |
| hsa-mir-338 | KCNH8     | 0.53  |
| hsa-mir-338 | KCNJ12    | 0.53  |
| hsa-mir-338 | KCNJ3     | 0.49  |
| hsa-mir-338 | KCNK1     | 0.66  |
| hsa-mir-338 | KCNK12    | 0.53  |
| hsa-mir-338 | KCNMB4    | 0.51  |
| hsa-mir-338 | KCTD14    | -0.38 |
| hsa-mir-338 | KCTD16    | 0.49  |
| hsa-mir-338 | KCTD4     | 0.58  |
| hsa-mir-338 | KDELC2    | -0.53 |
| hsa-mir-338 | KDELR2    | -0.52 |
| hsa-mir-338 | KHDRBS2   | 0.53  |
| hsa-mir-338 | KIAA0427  | 0.53  |
| hsa-mir-338 | KIAA0513  | 0.55  |
| hsa-mir-338 | KIAA0774  | 0.55  |
| hsa-mir-338 | KIAA1045  | 0.5   |
| hsa-mir-338 | KIAA1086  | 0.52  |
| hsa-mir-338 | KIAA1107  | 0.58  |
| hsa-mir-338 | KIAA1128  | 0.49  |
| hsa-mir-338 | KIAA1189  | 0.7   |
| hsa-mir-338 | KIAA1239  | 0.51  |
| hsa-mir-338 | KIAA1244  | 0.57  |
| hsa-mir-338 | KIAA1324L | 0.39  |
| hsa-mir-338 | KIAA1394  | 0.76  |
| hsa-mir-338 | KIAA1576  | 0.39  |
| hsa-mir-338 | KIAA1598  | 0.68  |
| hsa-mir-338 | KIAA1754L | -0.42 |
| hsa-mir-338 | KIAA1853  | 0.49  |
| hsa-mir-338 | KIAA2022  | 0.4   |
| hsa-mir-338 | KIF19     | 0.42  |
| hsa-mir-338 | KIF1A     | 0.47  |
| hsa-mir-338 | KIF21B    | 0.52  |
| hsa-mir-338 | KIF5A     | 0.5   |
| hsa-mir-338 | KIRREL3   | 0.46  |
| hsa-mir-338 | KLHL1     | 0.5   |
| hsa-mir-338 | KLHL32    | 0.57  |
| hsa-mir-338 | KLK6      | 0.74  |
| hsa-mir-338 | KLRC1     | 0.31  |
| hsa-mir-338 | KLRC2     | 0.38  |
| hsa-mir-338 | KLRC3     | 0.41  |
| hsa-mir-338 | KRT222P   | 0.58  |
| hsa-mir-338 | KSR2      | 0.54  |
| hsa-mir-338 | LANCL1    | 0.59  |
| hsa-mir-338 | LARGE     | 0.53  |
| hsa-mir-338 | LARP6     | 0.52  |
| hsa-mir-338 | LDB3      | 0.69  |
| hsa-mir-338 | LGI3      | 0.66  |

|             |          |       |
|-------------|----------|-------|
| hsa-mir-338 | LHFPL3   | 0.23  |
| hsa-mir-338 | LHPP     | 0.62  |
| hsa-mir-338 | LHX6     | 0.47  |
| hsa-mir-338 | LIMS2    | 0.44  |
| hsa-mir-338 | LINGO1   | 0.56  |
| hsa-mir-338 | LIPE     | 0.7   |
| hsa-mir-338 | LPHN2    | -0.15 |
| hsa-mir-338 | LRFN2    | 0.56  |
| hsa-mir-338 | LRFN5    | 0.48  |
| hsa-mir-338 | LRIG3    | -0.34 |
| hsa-mir-338 | LRP2     | 0.55  |
| hsa-mir-338 | LRRC16   | -0.22 |
| hsa-mir-338 | LRRC62   | 0.59  |
| hsa-mir-338 | LRRC7    | 0.55  |
| hsa-mir-338 | LRTM2    | 0.55  |
| hsa-mir-338 | LUZP2    | 0.33  |
| hsa-mir-338 | LY6H     | 0.46  |
| hsa-mir-338 | MAG      | 0.72  |
| hsa-mir-338 | MAGEE1   | 0.5   |
| hsa-mir-338 | MAGEH1   | 0.39  |
| hsa-mir-338 | MAL      | 0.71  |
| hsa-mir-338 | MAL2     | 0.45  |
| hsa-mir-338 | MAP1LC3C | -0.41 |
| hsa-mir-338 | MAP2K4   | 0.53  |
| hsa-mir-338 | MAP6D1   | 0.56  |
| hsa-mir-338 | MAST1    | 0.54  |
| hsa-mir-338 | MAST3    | 0.57  |
| hsa-mir-338 | MBOAT1   | -0.41 |
| hsa-mir-338 | MBP      | 0.72  |
| hsa-mir-338 | MCF2     | 0.38  |
| hsa-mir-338 | MCF2L    | 0.49  |
| hsa-mir-338 | MDFIC    | -0.49 |
| hsa-mir-338 | MEF2C    | 0.42  |
| hsa-mir-338 | MEGF9    | 0.39  |
| hsa-mir-338 | MGAT3    | 0.51  |
| hsa-mir-338 | MGAT4C   | 0.34  |
| hsa-mir-338 | MMD      | 0.38  |
| hsa-mir-338 | MNX1     | 0.28  |
| hsa-mir-338 | MOBP     | 0.77  |
| hsa-mir-338 | MOG      | 0.7   |
| hsa-mir-338 | MORC4    | -0.54 |
| hsa-mir-338 | MRC2     | -0.54 |
| hsa-mir-338 | MTMR7    | 0.54  |
| hsa-mir-338 | MTSS1    | 0.38  |
| hsa-mir-338 | MTTP     | -0.33 |
| hsa-mir-338 | MUM1L1   | 0.46  |
| hsa-mir-338 | MYOT     | 0.49  |
| hsa-mir-338 | MYRIP    | 0.35  |
| hsa-mir-338 | NALCN    | 0.58  |
| hsa-mir-338 | NAP1L2   | 0.57  |
| hsa-mir-338 | NAT8L    | 0.42  |
| hsa-mir-338 | NAV3     | 0.45  |
| hsa-mir-338 | NBEA     | 0.44  |

|             |          |       |
|-------------|----------|-------|
| hsa-mir-338 | NDN      | 0.39  |
| hsa-mir-338 | NEFH     | 0.46  |
| hsa-mir-338 | NEFL     | 0.43  |
| hsa-mir-338 | NEFM     | 0.51  |
| hsa-mir-338 | NETO1    | 0.56  |
| hsa-mir-338 | NEURL    | 0.59  |
| hsa-mir-338 | NGEF     | 0.41  |
| hsa-mir-338 | NINJ2    | 0.58  |
| hsa-mir-338 | NIPA1    | 0.42  |
| hsa-mir-338 | NKAPL    | 0.28  |
| hsa-mir-338 | NKIRAS1  | 0.46  |
| hsa-mir-338 | NKX6-2   | 0.61  |
| hsa-mir-338 | NMNAT2   | 0.47  |
| hsa-mir-338 | NPM2     | 0.64  |
| hsa-mir-338 | NPTX1    | 0.41  |
| hsa-mir-338 | NPY      | 0.53  |
| hsa-mir-338 | NPY1R    | 0.34  |
| hsa-mir-338 | NR0B1    | 0.49  |
| hsa-mir-338 | NRGN     | 0.47  |
| hsa-mir-338 | NRSN1    | 0.36  |
| hsa-mir-338 | NRXN1    | 0.45  |
| hsa-mir-338 | NTNG2    | 0.5   |
| hsa-mir-338 | NXT1     | -0.43 |
| hsa-mir-338 | NY-REN-7 | 0.51  |
| hsa-mir-338 | OLFM1    | 0.49  |
| hsa-mir-338 | OLFM3    | 0.42  |
| hsa-mir-338 | OMG      | 0.44  |
| hsa-mir-338 | OR2L13   | 0.64  |
| hsa-mir-338 | OSBPL3   | -0.47 |
| hsa-mir-338 | P2RX5    | 0.41  |
| hsa-mir-338 | P2RX7    | 0.44  |
| hsa-mir-338 | PACSN1   | 0.57  |
| hsa-mir-338 | PAIP2B   | 0.7   |
| hsa-mir-338 | PAK3     | 0.5   |
| hsa-mir-338 | PAK7     | 0.58  |
| hsa-mir-338 | PALM     | 0.47  |
| hsa-mir-338 | PAQR6    | 0.47  |
| hsa-mir-338 | PAQR9    | 0.38  |
| hsa-mir-338 | PCBP4    | 0.41  |
| hsa-mir-338 | PCDH11Y  | 0.62  |
| hsa-mir-338 | PCDH20   | 0.28  |
| hsa-mir-338 | PCDH7    | 0.42  |
| hsa-mir-338 | PCDHB5   | 0.11  |
| hsa-mir-338 | PCP4     | 0.29  |
| hsa-mir-338 | PCSK6    | 0.64  |
| hsa-mir-338 | PDE1A    | 0.44  |
| hsa-mir-338 | PDE2A    | 0.63  |
| hsa-mir-338 | PDGFD    | -0.41 |
| hsa-mir-338 | PDIA2    | 0.67  |
| hsa-mir-338 | PDLIM4   | -0.29 |
| hsa-mir-338 | PEG3     | 0.47  |
| hsa-mir-338 | PEX5L    | 0.7   |
| hsa-mir-338 | PGBD5    | 0.46  |



|             |           |       |
|-------------|-----------|-------|
| hsa-mir-338 | PHACTR3   | 0.53  |
| hsa-mir-338 | PHYHIP    | 0.54  |
| hsa-mir-338 | PIK3C2B   | 0.35  |
| hsa-mir-338 | PIP4K2A   | 0.6   |
| hsa-mir-338 | PLA2G7    | 0.39  |
| hsa-mir-338 | PLCB1     | 0.51  |
| hsa-mir-338 | PLCL1     | 0.62  |
| hsa-mir-338 | PLCXD3    | 0.4   |
| hsa-mir-338 | PLEKHA1   | 0.52  |
| hsa-mir-338 | PLEKHB1   | 0.48  |
| hsa-mir-338 | PLEKHG3   | 0.47  |
| hsa-mir-338 | PLEKHH1   | 0.6   |
| hsa-mir-338 | PLLP      | 0.59  |
| hsa-mir-338 | PLP1      | 0.75  |
| hsa-mir-338 | PNCK      | 0.54  |
| hsa-mir-338 | PNMA3     | 0.56  |
| hsa-mir-338 | PNMA5     | 0.56  |
| hsa-mir-338 | POPDC3    | 0.36  |
| hsa-mir-338 | PPFIA2    | 0.38  |
| hsa-mir-338 | PPIC      | -0.55 |
| hsa-mir-338 | PPM1H     | 0.61  |
| hsa-mir-338 | PPP1R14A  | 0.58  |
| hsa-mir-338 | PPP1R16B  | 0.75  |
| hsa-mir-338 | PPP1R1A   | 0.41  |
| hsa-mir-338 | PPP2R2C   | 0.62  |
| hsa-mir-338 | PRKCB1    | 0.51  |
| hsa-mir-338 | PRKCE     | 0.6   |
| hsa-mir-338 | PRKCQ     | 0.44  |
| hsa-mir-338 | PSCD1     | 0.5   |
| hsa-mir-338 | PSMAL     | 0.5   |
| hsa-mir-338 | PTGDS     | 0.38  |
| hsa-mir-338 | PTPN5     | 0.55  |
| hsa-mir-338 | PTPRD     | 0.34  |
| hsa-mir-338 | PTPRT     | 0.44  |
| hsa-mir-338 | PXK       | 0.48  |
| hsa-mir-338 | QDPR      | 0.66  |
| hsa-mir-338 | RAB11FIP4 | 0.61  |
| hsa-mir-338 | RAB33A    | 0.65  |
| hsa-mir-338 | RAB34     | -0.4  |
| hsa-mir-338 | RAB3A     | 0.6   |
| hsa-mir-338 | RAB3C     | 0.48  |
| hsa-mir-338 | RAB3IP    | 0.22  |
| hsa-mir-338 | RAB40B    | 0.67  |
| hsa-mir-338 | RAPGEF2   | 0.55  |
| hsa-mir-338 | RAPGEF4   | 0.51  |
| hsa-mir-338 | RAPGEF5   | 0.63  |
| hsa-mir-338 | RASAL1    | 0.54  |
| hsa-mir-338 | RASGEF1A  | 0.38  |
| hsa-mir-338 | RASGEF1C  | 0.59  |
| hsa-mir-338 | RASGRF1   | 0.56  |
| hsa-mir-338 | RASGRF2   | 0.55  |
| hsa-mir-338 | RASL10A   | 0.48  |
| hsa-mir-338 | RASL11B   | 0.41  |

|             |             |       |
|-------------|-------------|-------|
| hsa-mir-338 | RBM11       | 0.61  |
| hsa-mir-338 | RBP7        | 0.42  |
| hsa-mir-338 | RECQL       | -0.44 |
| hsa-mir-338 | REPS2       | 0.61  |
| hsa-mir-338 | RFPL2       | 0.51  |
| hsa-mir-338 | RHOJ        | -0.37 |
| hsa-mir-338 | RICH2       | 0.6   |
| hsa-mir-338 | RIMS2       | 0.56  |
| hsa-mir-338 | RIMS3       | 0.61  |
| hsa-mir-338 | RNF125      | 0.36  |
| hsa-mir-338 | RNF165      | 0.46  |
| hsa-mir-338 | RP11-35N6.1 | 0.56  |
| hsa-mir-338 | RPRML       | 0.44  |
| hsa-mir-338 | RPS6KA5     | 0.51  |
| hsa-mir-338 | RTKN        | 0.39  |
| hsa-mir-338 | RTN4R       | 0.45  |
| hsa-mir-338 | RUNDC3A     | 0.56  |
| hsa-mir-338 | RUNDC3B     | 0.4   |
| hsa-mir-338 | RUNX1T1     | 0.26  |
| hsa-mir-338 | RYR2        | 0.55  |
| hsa-mir-338 | S100A1      | 0.6   |
| hsa-mir-338 | SAMD12      | 0.61  |
| hsa-mir-338 | SAMD9L      | -0.45 |
| hsa-mir-338 | SCAMP5      | 0.54  |
| hsa-mir-338 | SCG3        | 0.39  |
| hsa-mir-338 | SEC14L5     | 0.75  |
| hsa-mir-338 | SEC61G      | -0.33 |
| hsa-mir-338 | SEMA4D      | 0.49  |
| hsa-mir-338 | SERPINE2    | 0.33  |
| hsa-mir-338 | SERPINI1    | 0.53  |
| hsa-mir-338 | SFRP1       | 0.38  |
| hsa-mir-338 | SFTPC       | 0.7   |
| hsa-mir-338 | SGCE        | -0.15 |
| hsa-mir-338 | SGK2        | 0.49  |
| hsa-mir-338 | SGSM1       | 0.52  |
| hsa-mir-338 | SH3BGRL2    | 0.49  |
| hsa-mir-338 | SH3D19      | 0.27  |
| hsa-mir-338 | SH3GL2      | 0.57  |
| hsa-mir-338 | SH3GL3      | 0.77  |
| hsa-mir-338 | SH3PXD2A    | 0.33  |
| hsa-mir-338 | SH3TC2      | 0.53  |
| hsa-mir-338 | SHANK2      | 0.6   |
| hsa-mir-338 | SHOX2       | -0.5  |
| hsa-mir-338 | SKIP        | 0.52  |
| hsa-mir-338 | SLAIN1      | 0.55  |
| hsa-mir-338 | SLC12A5     | 0.55  |
| hsa-mir-338 | SLC16A7     | 0.24  |
| hsa-mir-338 | SLC1A1      | 0.51  |
| hsa-mir-338 | SLC1A6      | 0.56  |
| hsa-mir-338 | SLC25A23    | 0.44  |
| hsa-mir-338 | SLC26A9     | 0.4   |
| hsa-mir-338 | SLC30A3     | 0.52  |
| hsa-mir-338 | SLC35D1     | -0.55 |

|             |            |       |
|-------------|------------|-------|
| hsa-mir-338 | SLC35F3    | 0.7   |
| hsa-mir-338 | SLC45A3    | 0.65  |
| hsa-mir-338 | SLC5A11    | 0.73  |
| hsa-mir-338 | SLC7A14    | 0.68  |
| hsa-mir-338 | SLC8A3     | 0.56  |
| hsa-mir-338 | SLCO1A2    | 0.47  |
| hsa-mir-338 | SLIT1      | 0.37  |
| hsa-mir-338 | SLITRK1    | 0.59  |
| hsa-mir-338 | SLITRK4    | 0.6   |
| hsa-mir-338 | SLITRK5    | 0.35  |
| hsa-mir-338 | SMOC1      | 0.39  |
| hsa-mir-338 | SNAP25     | 0.48  |
| hsa-mir-338 | SNAP91     | 0.57  |
| hsa-mir-338 | SNCA       | 0.58  |
| hsa-mir-338 | SNIP       | 0.78  |
| hsa-mir-338 | SNTG2      | 0.25  |
| hsa-mir-338 | SOCS2      | -0.4  |
| hsa-mir-338 | SOX10      | 0.63  |
| hsa-mir-338 | SP8        | -0.23 |
| hsa-mir-338 | SPG3A      | 0.56  |
| hsa-mir-338 | SPOCK1     | 0.47  |
| hsa-mir-338 | SPOCK3     | 0.75  |
| hsa-mir-338 | SSTR1      | 0.59  |
| hsa-mir-338 | ST18       | 0.54  |
| hsa-mir-338 | ST3GAL5    | 0.33  |
| hsa-mir-338 | ST6GALNAC3 | 0.47  |
| hsa-mir-338 | ST8SIA3    | 0.5   |
| hsa-mir-338 | STEAP3     | -0.47 |
| hsa-mir-338 | STRA8      | 0.26  |
| hsa-mir-338 | STX1B      | 0.5   |
| hsa-mir-338 | STXBP1     | 0.59  |
| hsa-mir-338 | STXBP5L    | 0.44  |
| hsa-mir-338 | STXBP6     | 0.59  |
| hsa-mir-338 | SULT4A1    | 0.51  |
| hsa-mir-338 | SUSD5      | 0.45  |
| hsa-mir-338 | SV2B       | 0.48  |
| hsa-mir-338 | SV2C       | 0.49  |
| hsa-mir-338 | SVIP       | 0.29  |
| hsa-mir-338 | SYN2       | 0.52  |
| hsa-mir-338 | SYN3       | 0.51  |
| hsa-mir-338 | SYNGR1     | 0.57  |
| hsa-mir-338 | SYNPR      | 0.45  |
| hsa-mir-338 | SYT13      | 0.57  |
| hsa-mir-338 | TCBA1      | 0.71  |
| hsa-mir-338 | TCEAL2     | 0.43  |
| hsa-mir-338 | TCERG1L    | 0.54  |
| hsa-mir-338 | TDRD9      | 0.42  |
| hsa-mir-338 | TEAD2      | -0.42 |
| hsa-mir-338 | TF         | 0.77  |
| hsa-mir-338 | TLL2       | 0.55  |
| hsa-mir-338 | TMCC2      | 0.71  |
| hsa-mir-338 | TMEFF1     | 0.53  |
| hsa-mir-338 | TMEFF2     | 0.66  |

|             |          |       |
|-------------|----------|-------|
| hsa-mir-338 | TMEM10   | 0.68  |
| hsa-mir-338 | TMEM121  | 0.37  |
| hsa-mir-338 | TMEM125  | 0.77  |
| hsa-mir-338 | TMEM130  | 0.5   |
| hsa-mir-338 | TMEM132B | 0.41  |
| hsa-mir-338 | TMEM139  | 0.4   |
| hsa-mir-338 | TMEM144  | 0.58  |
| hsa-mir-338 | TMEM151  | 0.62  |
| hsa-mir-338 | TMEM16C  | 0.64  |
| hsa-mir-338 | TMEM16D  | 0.55  |
| hsa-mir-338 | TMEM28   | 0.47  |
| hsa-mir-338 | TMEM46   | 0.42  |
| hsa-mir-338 | TMEM48   | -0.45 |
| hsa-mir-338 | TMEM67   | -0.44 |
| hsa-mir-338 | TMEM71   | -0.41 |
| hsa-mir-338 | TMTC4    | 0.39  |
| hsa-mir-338 | TNFRSF19 | -0.41 |
| hsa-mir-338 | TNNT1    | 0.41  |
| hsa-mir-338 | TNRC4    | 0.55  |
| hsa-mir-338 | TPPP     | 0.63  |
| hsa-mir-338 | TRAM1L1  | 0.37  |
| hsa-mir-338 | TRIM2    | 0.47  |
| hsa-mir-338 | TRIM45   | -0.37 |
| hsa-mir-338 | TRIM5    | -0.5  |
| hsa-mir-338 | TSPAN8   | 0.42  |
| hsa-mir-338 | TSPYL4   | 0.48  |
| hsa-mir-338 | TTC9B    | 0.54  |
| hsa-mir-338 | TULP4    | 0.54  |
| hsa-mir-338 | UGT8     | 0.7   |
| hsa-mir-338 | ULK2     | 0.47  |
| hsa-mir-338 | UNC13A   | 0.47  |
| hsa-mir-338 | UNC13C   | 0.45  |
| hsa-mir-338 | USH1C    | 0.46  |
| hsa-mir-338 | USP43    | 0.54  |
| hsa-mir-338 | VSNL1    | 0.39  |
| hsa-mir-338 | WASF1    | 0.59  |
| hsa-mir-338 | WDR7     | 0.54  |
| hsa-mir-338 | WEE1     | -0.51 |
| hsa-mir-338 | WIF1     | 0.4   |
| hsa-mir-338 | WNT10B   | 0.52  |
| hsa-mir-338 | WSCD2    | 0.49  |
| hsa-mir-338 | YPEL4    | 0.6   |
| hsa-mir-338 | ZDHHC11  | 0.44  |
| hsa-mir-338 | ZEB2     | 0.49  |
| hsa-mir-338 | ZMAT4    | 0.2   |
| hsa-mir-338 | ZNF142   | 0.52  |
| hsa-mir-338 | ZNF217   | -0.51 |
| hsa-mir-338 | ZNF365   | 0.5   |
| hsa-mir-338 | ZNF469   | 0.35  |
| hsa-mir-338 | ZNF488   | 0.61  |
| hsa-mir-338 | ZNF536   | 0.55  |
| hsa-mir-339 | AFP      | -0.23 |
| hsa-mir-339 | ALS2CR12 | 0.33  |

|             |            |       |
|-------------|------------|-------|
| hsa-mir-339 | ARSK       | 0.42  |
| hsa-mir-339 | C7orf29    | -0.13 |
| hsa-mir-339 | C7orf50    | 0.31  |
| hsa-mir-339 | CBLL1      | 0.41  |
| hsa-mir-339 | CCK        | -0.26 |
| hsa-mir-339 | CDH18      | -0.38 |
| hsa-mir-339 | CDH9       | -0.42 |
| hsa-mir-339 | CHRNA3     | -0.3  |
| hsa-mir-339 | CLCN5      | 0.5   |
| hsa-mir-339 | CNTNAP2    | -0.39 |
| hsa-mir-339 | DOK6       | -0.41 |
| hsa-mir-339 | FLJ22374   | 0.39  |
| hsa-mir-339 | GABRB3     | -0.42 |
| hsa-mir-339 | GJB1       | -0.42 |
| hsa-mir-339 | GLT1D1     | -0.42 |
| hsa-mir-339 | GTF2IRD2   | 0.34  |
| hsa-mir-339 | HGD        | 0.02  |
| hsa-mir-339 | HOOK1      | -0.4  |
| hsa-mir-339 | JPH3       | -0.37 |
| hsa-mir-339 | KATNAL2    | 0.43  |
| hsa-mir-339 | KHDRBS2    | -0.4  |
| hsa-mir-339 | KIAA1086   | -0.39 |
| hsa-mir-339 | LOC441054  | 0.44  |
| hsa-mir-339 | LOC91461   | -0.47 |
| hsa-mir-339 | MTTP       | 0.25  |
| hsa-mir-339 | NDN        | -0.32 |
| hsa-mir-339 | NEFL       | -0.35 |
| hsa-mir-339 | NEFM       | -0.36 |
| hsa-mir-339 | NPTX2      | -0.22 |
| hsa-mir-339 | PCSK6      | -0.38 |
| hsa-mir-339 | PEG3       | -0.39 |
| hsa-mir-339 | PHEX       | 0.45  |
| hsa-mir-339 | POU3F3     | -0.23 |
| hsa-mir-339 | RASEF      | 0.26  |
| hsa-mir-339 | S100A2     | 0.54  |
| hsa-mir-339 | SEMA3G     | -0.41 |
| hsa-mir-339 | SH3GL3     | -0.44 |
| hsa-mir-339 | SLC17A3    | 0.38  |
| hsa-mir-339 | SLC6A4     | -0.33 |
| hsa-mir-339 | SLITRK4    | -0.38 |
| hsa-mir-339 | SOX18      | -0.14 |
| hsa-mir-339 | SPINK5     | -0.32 |
| hsa-mir-339 | SYT6       | -0.38 |
| hsa-mir-339 | tcag7.1136 | 0.44  |
| hsa-mir-339 | TTC26      | 0.51  |
| hsa-mir-339 | UGT8       | -0.36 |
| hsa-mir-340 | ANXA1      | -0.41 |
| hsa-mir-340 | ANXA4      | -0.4  |
| hsa-mir-340 | APOBEC3C   | -0.37 |
| hsa-mir-340 | ARHGAP18   | -0.42 |
| hsa-mir-340 | BCAP29     | -0.37 |
| hsa-mir-340 | BIC        | -0.37 |
| hsa-mir-340 | CCDC109B   | -0.45 |

|             |           |       |
|-------------|-----------|-------|
| hsa-mir-340 | CD58      | -0.31 |
| hsa-mir-340 | CDH18     | 0.26  |
| hsa-mir-340 | CDH7      | 0.35  |
| hsa-mir-340 | CHI3L1    | -0.33 |
| hsa-mir-340 | COP1      | -0.42 |
| hsa-mir-340 | CPVL      | -0.28 |
| hsa-mir-340 | CROT      | -0.29 |
| hsa-mir-340 | CST7      | -0.35 |
| hsa-mir-340 | CSTA      | -0.44 |
| hsa-mir-340 | CXCR4     | -0.34 |
| hsa-mir-340 | DDB2      | -0.19 |
| hsa-mir-340 | DENND2D   | -0.33 |
| hsa-mir-340 | DOK6      | 0.34  |
| hsa-mir-340 | DPYD      | -0.35 |
| hsa-mir-340 | EFEMP1    | -0.33 |
| hsa-mir-340 | FAM129A   | -0.38 |
| hsa-mir-340 | FAS       | -0.34 |
| hsa-mir-340 | HS3ST3B1  | -0.33 |
| hsa-mir-340 | LGALS1    | -0.4  |
| hsa-mir-340 | LOC493869 | -0.42 |
| hsa-mir-340 | LTF       | -0.33 |
| hsa-mir-340 | MELK      | -0.11 |
| hsa-mir-340 | MR1       | -0.37 |
| hsa-mir-340 | MYBPH     | -0.19 |
| hsa-mir-340 | NETO1     | 0.38  |
| hsa-mir-340 | NNMT      | -0.38 |
| hsa-mir-340 | PALLD     | -0.36 |
| hsa-mir-340 | PLEK2     | -0.37 |
| hsa-mir-340 | PLP2      | -0.37 |
| hsa-mir-340 | PLSCR1    | -0.36 |
| hsa-mir-340 | PPIC      | -0.4  |
| hsa-mir-340 | PYGL      | -0.33 |
| hsa-mir-340 | RAB27A    | -0.28 |
| hsa-mir-340 | RETN      | -0.36 |
| hsa-mir-340 | S100A11   | -0.37 |
| hsa-mir-340 | S100A4    | -0.42 |
| hsa-mir-340 | SAA1      | -0.36 |
| hsa-mir-340 | SLC24A5   | 0.28  |
| hsa-mir-340 | SLITRK1   | 0.34  |
| hsa-mir-340 | SLITRK4   | 0.33  |
| hsa-mir-340 | STEAP3    | -0.39 |
| hsa-mir-340 | TERF2IP   | 0.3   |
| hsa-mir-340 | TMEM64    | -0.33 |
| hsa-mir-340 | TMSL3     | -0.23 |
| hsa-mir-340 | TNC       | -0.25 |
| hsa-mir-340 | TNFRSF12A | -0.29 |
| hsa-mir-340 | TOP2A     | -0.04 |
| hsa-mir-340 | ZAK       | -0.35 |
| hsa-mir-342 | March4    | 0.45  |
| hsa-mir-342 | ACTL6B    | 0.55  |
| hsa-mir-342 | ADCYAP1   | 0.45  |
| hsa-mir-342 | ARHGEF7   | 0.51  |
| hsa-mir-342 | ARPP-21   | 0.52  |

|             |          |       |
|-------------|----------|-------|
| hsa-mir-342 | ATP6V1G2 | 0.53  |
| hsa-mir-342 | ATRNL1   | 0.49  |
| hsa-mir-342 | B3GALT2  | 0.48  |
| hsa-mir-342 | BCL11B   | 0.41  |
| hsa-mir-342 | BRMS1L   | 0.49  |
| hsa-mir-342 | CAMKV    | 0.49  |
| hsa-mir-342 | CNTN4    | 0.51  |
| hsa-mir-342 | CNTN6    | 0.53  |
| hsa-mir-342 | CRYM     | 0.33  |
| hsa-mir-342 | DACH2    | 0.52  |
| hsa-mir-342 | DSCAML1  | 0.5   |
| hsa-mir-342 | DUSP26   | 0.48  |
| hsa-mir-342 | ELAVL4   | 0.44  |
| hsa-mir-342 | EVL      | 0.59  |
| hsa-mir-342 | FKBP10   | -0.49 |
| hsa-mir-342 | FUT9     | 0.47  |
| hsa-mir-342 | GABRB3   | 0.45  |
| hsa-mir-342 | GNG2     | 0.48  |
| hsa-mir-342 | GRIN3A   | 0.53  |
| hsa-mir-342 | GRM3     | 0.48  |
| hsa-mir-342 | HMP19    | 0.48  |
| hsa-mir-342 | INSM2    | 0.56  |
| hsa-mir-342 | KCNK2    | 0.43  |
| hsa-mir-342 | LRFN2    | 0.49  |
| hsa-mir-342 | LRRC8B   | 0.5   |
| hsa-mir-342 | LRRTM1   | 0.52  |
| hsa-mir-342 | MTSS1    | 0.47  |
| hsa-mir-342 | OPCML    | 0.47  |
| hsa-mir-342 | PAK3     | 0.47  |
| hsa-mir-342 | PAK7     | 0.5   |
| hsa-mir-342 | PFN2     | 0.48  |
| hsa-mir-342 | PTPRO    | 0.39  |
| hsa-mir-342 | RAB33A   | 0.5   |
| hsa-mir-342 | RAB3A    | 0.53  |
| hsa-mir-342 | RAB3C    | 0.47  |
| hsa-mir-342 | RAI2     | 0.47  |
| hsa-mir-342 | RAPGEF4  | 0.49  |
| hsa-mir-342 | REEP1    | 0.47  |
| hsa-mir-342 | RIMS3    | 0.52  |
| hsa-mir-342 | RPS6KA5  | 0.55  |
| hsa-mir-342 | SGIP1    | 0.5   |
| hsa-mir-342 | SKIP     | 0.49  |
| hsa-mir-342 | SNAP91   | 0.49  |
| hsa-mir-342 | SRPK2    | 0.47  |
| hsa-mir-342 | SSTR1    | 0.41  |
| hsa-mir-342 | ST6GAL2  | 0.42  |
| hsa-mir-342 | ST8SIA3  | 0.43  |
| hsa-mir-342 | STX1B    | 0.48  |
| hsa-mir-342 | SYT13    | 0.42  |
| hsa-mir-342 | SYT4     | 0.42  |
| hsa-mir-342 | TMEM35   | 0.5   |
| hsa-mir-342 | TNRC4    | 0.5   |
| hsa-mir-342 | TTC9     | 0.48  |

|             |           |       |
|-------------|-----------|-------|
| hsa-mir-342 | UGT8      | 0.45  |
| hsa-mir-342 | WASF1     | 0.54  |
| hsa-mir-342 | ZDHHC22   | 0.44  |
| hsa-mir-345 | APOC2     | -0.08 |
| hsa-mir-345 | CD33      | -0.07 |
| hsa-mir-345 | ITGB2     | -0.08 |
| hsa-mir-345 | LILRA2    | -0.15 |
| hsa-mir-345 | PMAIP1    | -0.18 |
| hsa-mir-345 | TRPM2     | -0.17 |
| hsa-mir-34a | AADAACL1  | 0.25  |
| hsa-mir-34a | ABCC3     | 0.6   |
| hsa-mir-34a | ACOX2     | 0.53  |
| hsa-mir-34a | AIFM2     | 0.45  |
| hsa-mir-34a | ALS2CR13  | -0.56 |
| hsa-mir-34a | ANG       | 0.43  |
| hsa-mir-34a | ANKRD13B  | -0.49 |
| hsa-mir-34a | ANXA1     | 0.57  |
| hsa-mir-34a | ANXA2     | 0.54  |
| hsa-mir-34a | ANXA4     | 0.52  |
| hsa-mir-34a | AOF2      | -0.46 |
| hsa-mir-34a | APLP2     | 0.51  |
| hsa-mir-34a | APOB48R   | 0.55  |
| hsa-mir-34a | APOBEC3C  | 0.55  |
| hsa-mir-34a | APOBEC3F  | 0.58  |
| hsa-mir-34a | ARID5A    | 0.47  |
| hsa-mir-34a | ARL9      | 0.27  |
| hsa-mir-34a | ARSJ      | 0.56  |
| hsa-mir-34a | ASXL3     | -0.53 |
| hsa-mir-34a | B3GNT5    | 0.38  |
| hsa-mir-34a | BATF2     | 0.38  |
| hsa-mir-34a | BCL11A    | -0.47 |
| hsa-mir-34a | BCL3      | 0.5   |
| hsa-mir-34a | BCL7A     | -0.57 |
| hsa-mir-34a | BHLHB2    | 0.42  |
| hsa-mir-34a | BHLHB3    | 0.43  |
| hsa-mir-34a | BIRC3     | 0.42  |
| hsa-mir-34a | BLVRB     | 0.38  |
| hsa-mir-34a | C10orf10  | 0.38  |
| hsa-mir-34a | C12orf5   | 0.38  |
| hsa-mir-34a | C13orf18  | 0.52  |
| hsa-mir-34a | C16orf80  | -0.44 |
| hsa-mir-34a | C1RL      | 0.55  |
| hsa-mir-34a | C1S       | 0.46  |
| hsa-mir-34a | C20orf42  | -0.36 |
| hsa-mir-34a | C5orf32   | 0.38  |
| hsa-mir-34a | CA12      | 0.51  |
| hsa-mir-34a | CAMSAP1L1 | -0.48 |
| hsa-mir-34a | CAPN2     | 0.54  |
| hsa-mir-34a | CARD6     | 0.43  |
| hsa-mir-34a | CASP1     | 0.46  |
| hsa-mir-34a | CASP4     | 0.5   |
| hsa-mir-34a | CASP5     | 0.44  |
| hsa-mir-34a | CAST      | 0.57  |



|             |         |       |
|-------------|---------|-------|
| hsa-mir-34a | CBLN1   | -0.5  |
| hsa-mir-34a | CCDC46  | 0.46  |
| hsa-mir-34a | CCL2    | 0.44  |
| hsa-mir-34a | CCL7    | 0.31  |
| hsa-mir-34a | CD302   | 0.41  |
| hsa-mir-34a | CDKN1A  | 0.63  |
| hsa-mir-34a | CEBPB   | 0.47  |
| hsa-mir-34a | CEBPD   | 0.51  |
| hsa-mir-34a | CEBPE   | 0.5   |
| hsa-mir-34a | CFH     | 0.42  |
| hsa-mir-34a | CHI3L1  | 0.52  |
| hsa-mir-34a | CHI3L2  | 0.3   |
| hsa-mir-34a | CHST7   | 0.36  |
| hsa-mir-34a | CIITA   | 0.4   |
| hsa-mir-34a | CKS2    | -0.26 |
| hsa-mir-34a | CLASP2  | -0.52 |
| hsa-mir-34a | CLCF1   | 0.5   |
| hsa-mir-34a | CLDN23  | 0.51  |
| hsa-mir-34a | CLEC5A  | 0.54  |
| hsa-mir-34a | CLGN    | -0.35 |
| hsa-mir-34a | CMYA5   | 0.52  |
| hsa-mir-34a | COL4A2  | 0.36  |
| hsa-mir-34a | COL8A1  | 0.47  |
| hsa-mir-34a | COL8A2  | 0.54  |
| hsa-mir-34a | COP1    | 0.5   |
| hsa-mir-34a | COPZ2   | 0.46  |
| hsa-mir-34a | COX7A2  | -0.36 |
| hsa-mir-34a | CUEDC2  | -0.47 |
| hsa-mir-34a | CWF19L1 | -0.39 |
| hsa-mir-34a | CXCL14  | 0.47  |
| hsa-mir-34a | CYP4V2  | 0.44  |
| hsa-mir-34a | DCTN3   | -0.43 |
| hsa-mir-34a | DCUN1D2 | -0.37 |
| hsa-mir-34a | DCX     | -0.47 |
| hsa-mir-34a | DDB2    | 0.57  |
| hsa-mir-34a | DHX58   | 0.43  |
| hsa-mir-34a | DIRAS3  | 0.48  |
| hsa-mir-34a | DLC1    | 0.46  |
| hsa-mir-34a | DLL3    | -0.47 |
| hsa-mir-34a | DNA2L   | -0.46 |
| hsa-mir-34a | DRAM    | 0.62  |
| hsa-mir-34a | DUSP26  | -0.43 |
| hsa-mir-34a | DUSP5   | 0.35  |
| hsa-mir-34a | DUSP6   | 0.45  |
| hsa-mir-34a | ECHDC2  | 0.4   |
| hsa-mir-34a | EFEMP1  | 0.46  |
| hsa-mir-34a | EFEMP2  | 0.55  |
| hsa-mir-34a | EGR1    | 0.41  |
| hsa-mir-34a | EMILIN2 | 0.35  |
| hsa-mir-34a | EMP1    | 0.49  |
| hsa-mir-34a | EMP3    | 0.5   |
| hsa-mir-34a | ENDOD1  | 0.42  |
| hsa-mir-34a | EPAS1   | 0.42  |

|             |          |       |
|-------------|----------|-------|
| hsa-mir-34a | EPHA2    | 0.4   |
| hsa-mir-34a | EPHB1    | -0.38 |
| hsa-mir-34a | EPS8L2   | 0.48  |
| hsa-mir-34a | ERBB2    | 0.39  |
| hsa-mir-34a | ETV7     | 0.47  |
| hsa-mir-34a | EYA2     | 0.36  |
| hsa-mir-34a | F11R     | 0.55  |
| hsa-mir-34a | FAH      | 0.54  |
| hsa-mir-34a | FAM129A  | 0.53  |
| hsa-mir-34a | FAM19A3  | 0.35  |
| hsa-mir-34a | FAM77C   | -0.5  |
| hsa-mir-34a | FBXO17   | 0.29  |
| hsa-mir-34a | FCGBP    | 0.49  |
| hsa-mir-34a | FCGR2B   | 0.49  |
| hsa-mir-34a | FDXR     | 0.51  |
| hsa-mir-34a | FER1L3   | 0.56  |
| hsa-mir-34a | FES      | 0.57  |
| hsa-mir-34a | FKBP9L   | 0.45  |
| hsa-mir-34a | FLJ11286 | 0.5   |
| hsa-mir-34a | FLJ21963 | 0.55  |
| hsa-mir-34a | FMOD     | 0.41  |
| hsa-mir-34a | FSD1     | -0.52 |
| hsa-mir-34a | FYCO1    | 0.48  |
| hsa-mir-34a | GAA      | 0.47  |
| hsa-mir-34a | GAB3     | 0.51  |
| hsa-mir-34a | GADD45B  | 0.46  |
| hsa-mir-34a | GDF15    | 0.58  |
| hsa-mir-34a | GIMAP8   | 0.43  |
| hsa-mir-34a | GJB2     | 0.36  |
| hsa-mir-34a | GKAP1    | -0.4  |
| hsa-mir-34a | GLCCI1   | -0.51 |
| hsa-mir-34a | GLG1     | 0.43  |
| hsa-mir-34a | GNG4     | -0.57 |
| hsa-mir-34a | GPNMB    | 0.27  |
| hsa-mir-34a | GPR137C  | -0.44 |
| hsa-mir-34a | GPSM2    | -0.42 |
| hsa-mir-34a | GSTA4    | -0.51 |
| hsa-mir-34a | HDAC7A   | 0.42  |
| hsa-mir-34a | HERPUD1  | 0.44  |
| hsa-mir-34a | HES5     | -0.5  |
| hsa-mir-34a | HES6     | -0.45 |
| hsa-mir-34a | HIST1H4C | -0.41 |
| hsa-mir-34a | HIST1H4D | -0.42 |
| hsa-mir-34a | HIST1H4L | -0.43 |
| hsa-mir-34a | HLA-B    | 0.45  |
| hsa-mir-34a | HMHA1    | 0.5   |
| hsa-mir-34a | HRASLS3  | 0.43  |
| hsa-mir-34a | HRH1     | 0.48  |
| hsa-mir-34a | HS3ST3B1 | 0.42  |
| hsa-mir-34a | HSF2     | -0.52 |
| hsa-mir-34a | HSPA14   | -0.43 |
| hsa-mir-34a | HSPA5    | 0.45  |
| hsa-mir-34a | HSPB1    | 0.45  |

|             |           |       |
|-------------|-----------|-------|
| hsa-mir-34a | IDI1      | -0.45 |
| hsa-mir-34a | IL4R      | 0.5   |
| hsa-mir-34a | INCA      | 0.49  |
| hsa-mir-34a | ISG20L1   | 0.48  |
| hsa-mir-34a | ITGA3     | 0.46  |
| hsa-mir-34a | ITGA7     | 0.53  |
| hsa-mir-34a | ITGB5     | 0.48  |
| hsa-mir-34a | ITGBL1    | 0.39  |
| hsa-mir-34a | KCNK2     | -0.38 |
| hsa-mir-34a | KCNN4     | 0.45  |
| hsa-mir-34a | KCTD12    | 0.49  |
| hsa-mir-34a | KLHL23    | -0.57 |
| hsa-mir-34a | KLRC1     | -0.4  |
| hsa-mir-34a | KLRC2     | -0.39 |
| hsa-mir-34a | KLRC3     | -0.44 |
| hsa-mir-34a | LATS2     | 0.51  |
| hsa-mir-34a | LEPREL1   | 0.5   |
| hsa-mir-34a | LGALS3    | 0.51  |
| hsa-mir-34a | LHFPL2    | 0.51  |
| hsa-mir-34a | LMO2      | 0.52  |
| hsa-mir-34a | LOC162073 | 0.52  |
| hsa-mir-34a | LOC26010  | 0.56  |
| hsa-mir-34a | LOC81691  | -0.48 |
| hsa-mir-34a | LRCH2     | -0.47 |
| hsa-mir-34a | LRP10     | 0.49  |
| hsa-mir-34a | LRRC2     | 0.25  |
| hsa-mir-34a | LRRC40    | -0.41 |
| hsa-mir-34a | LTBP1     | 0.4   |
| hsa-mir-34a | LTF       | 0.33  |
| hsa-mir-34a | MANBA     | 0.51  |
| hsa-mir-34a | MAOB      | 0.31  |
| hsa-mir-34a | MAST1     | -0.5  |
| hsa-mir-34a | METRNL    | 0.54  |
| hsa-mir-34a | METTL7B   | 0.49  |
| hsa-mir-34a | MEX3A     | -0.41 |
| hsa-mir-34a | MEX3B     | -0.45 |
| hsa-mir-34a | MGC4294   | 0.34  |
| hsa-mir-34a | MGC7036   | 0.52  |
| hsa-mir-34a | MICALL2   | 0.53  |
| hsa-mir-34a | MKRN3     | -0.46 |
| hsa-mir-34a | MLLT11    | -0.45 |
| hsa-mir-34a | MMAA      | 0.49  |
| hsa-mir-34a | MOXD1     | 0.39  |
| hsa-mir-34a | MSN       | 0.55  |
| hsa-mir-34a | MST150    | 0.6   |
| hsa-mir-34a | MT1B      | 0.54  |
| hsa-mir-34a | MT1E      | 0.44  |
| hsa-mir-34a | MT1G      | 0.47  |
| hsa-mir-34a | MT1H      | 0.54  |
| hsa-mir-34a | MT1JP     | 0.48  |
| hsa-mir-34a | MT1X      | 0.47  |
| hsa-mir-34a | MT2A      | 0.52  |
| hsa-mir-34a | MVP       | 0.55  |

|             |          |       |
|-------------|----------|-------|
| hsa-mir-34a | MXRA8    | 0.42  |
| hsa-mir-34a | MYH9     | 0.47  |
| hsa-mir-34a | MYO1E    | 0.51  |
| hsa-mir-34a | NOTCH2NL | 0.46  |
| hsa-mir-34a | NR2E1    | 0.33  |
| hsa-mir-34a | NSBP1    | -0.23 |
| hsa-mir-34a | NUDT11   | -0.38 |
| hsa-mir-34a | NUDT16   | 0.42  |
| hsa-mir-34a | NUF2     | -0.27 |
| hsa-mir-34a | OPLAH    | 0.46  |
| hsa-mir-34a | OSBPL3   | 0.55  |
| hsa-mir-34a | OVOS2    | -0.42 |
| hsa-mir-34a | OXTR     | 0.4   |
| hsa-mir-34a | PABPC5   | -0.39 |
| hsa-mir-34a | PAM      | 0.49  |
| hsa-mir-34a | PANK1    | -0.37 |
| hsa-mir-34a | PAPD1    | -0.48 |
| hsa-mir-34a | PBEF1    | 0.43  |
| hsa-mir-34a | PBK      | -0.18 |
| hsa-mir-34a | PCSK5    | 0.55  |
| hsa-mir-34a | PDGFRA   | -0.4  |
| hsa-mir-34a | PDLIM4   | 0.41  |
| hsa-mir-34a | PDPN     | 0.49  |
| hsa-mir-34a | PDSS1    | -0.45 |
| hsa-mir-34a | PFN2     | -0.48 |
| hsa-mir-34a | PGCP     | 0.47  |
| hsa-mir-34a | PHLDA3   | 0.57  |
| hsa-mir-34a | PKIB     | 0.42  |
| hsa-mir-34a | PLA2G5   | 0.51  |
| hsa-mir-34a | PLAT     | 0.33  |
| hsa-mir-34a | PLAU     | 0.52  |
| hsa-mir-34a | PLAUR    | 0.47  |
| hsa-mir-34a | PLEKHG1  | 0.39  |
| hsa-mir-34a | PLEKHQ1  | 0.44  |
| hsa-mir-34a | PLK3     | 0.58  |
| hsa-mir-34a | PLS3     | 0.52  |
| hsa-mir-34a | PLTP     | 0.47  |
| hsa-mir-34a | PLXNB2   | 0.42  |
| hsa-mir-34a | PMP22    | 0.53  |
| hsa-mir-34a | PODXL2   | -0.5  |
| hsa-mir-34a | PPIC     | 0.45  |
| hsa-mir-34a | PQLC3    | 0.51  |
| hsa-mir-34a | PRDM1    | 0.45  |
| hsa-mir-34a | PRTFDC1  | -0.46 |
| hsa-mir-34a | PSTK     | -0.4  |
| hsa-mir-34a | PTBP2    | -0.49 |
| hsa-mir-34a | PTGS1    | 0.48  |
| hsa-mir-34a | PTRF     | 0.6   |
| hsa-mir-34a | PTTG3    | -0.17 |
| hsa-mir-34a | PTX3     | 0.44  |
| hsa-mir-34a | PYGL     | 0.55  |
| hsa-mir-34a | QSOX1    | 0.47  |
| hsa-mir-34a | RAB31    | 0.44  |

|             |            |       |
|-------------|------------|-------|
| hsa-mir-34a | RAB33A     | -0.55 |
| hsa-mir-34a | RAB34      | 0.52  |
| hsa-mir-34a | RAB3C      | -0.4  |
| hsa-mir-34a | RAMP1      | 0.37  |
| hsa-mir-34a | RANBP17    | -0.42 |
| hsa-mir-34a | RAP2A      | -0.51 |
| hsa-mir-34a | RBPMS      | 0.38  |
| hsa-mir-34a | RDH5       | 0.41  |
| hsa-mir-34a | RHBDF2     | 0.48  |
| hsa-mir-34a | RIN1       | 0.47  |
| hsa-mir-34a | RNASEH2B   | -0.22 |
| hsa-mir-34a | RNF135     | 0.62  |
| hsa-mir-34a | RNF165     | -0.47 |
| hsa-mir-34a | RPS27L     | 0.55  |
| hsa-mir-34a | RUNX1      | 0.47  |
| hsa-mir-34a | S100A16    | 0.53  |
| hsa-mir-34a | SAA1       | 0.37  |
| hsa-mir-34a | SAMD9L     | 0.49  |
| hsa-mir-34a | SEC61A2    | -0.52 |
| hsa-mir-34a | SERPING1   | 0.49  |
| hsa-mir-34a | SFRP4      | 0.38  |
| hsa-mir-34a | SH3TC1     | 0.48  |
| hsa-mir-34a | SHD        | -0.48 |
| hsa-mir-34a | SHROOM3    | 0.51  |
| hsa-mir-34a | SIPA1      | 0.45  |
| hsa-mir-34a | SIRT4      | -0.4  |
| hsa-mir-34a | SLC11A1    | 0.43  |
| hsa-mir-34a | SLC24A6    | 0.49  |
| hsa-mir-34a | SLC27A1    | 0.44  |
| hsa-mir-34a | SLC27A3    | 0.5   |
| hsa-mir-34a | SOCS3      | 0.45  |
| hsa-mir-34a | SOX4       | -0.42 |
| hsa-mir-34a | SP110      | 0.43  |
| hsa-mir-34a | SPRY4      | 0.38  |
| hsa-mir-34a | SQSTM1     | 0.42  |
| hsa-mir-34a | SRPX       | 0.45  |
| hsa-mir-34a | SRPX2      | 0.5   |
| hsa-mir-34a | STEAP1     | 0.35  |
| hsa-mir-34a | STEAP3     | 0.6   |
| hsa-mir-34a | STMN1      | -0.53 |
| hsa-mir-34a | SUMF1      | 0.56  |
| hsa-mir-34a | SUV39H2    | -0.49 |
| hsa-mir-34a | SWAP70     | 0.6   |
| hsa-mir-34a | TAS1R1     | 0.38  |
| hsa-mir-34a | TBC1D7     | -0.38 |
| hsa-mir-34a | tcag7.1314 | 0.5   |
| hsa-mir-34a | TCEA3      | 0.51  |
| hsa-mir-34a | TCIRG1     | 0.52  |
| hsa-mir-34a | TFCP2L1    | 0.49  |
| hsa-mir-34a | TGFBR2     | 0.52  |
| hsa-mir-34a | THBD       | 0.4   |
| hsa-mir-34a | TIMP1      | 0.56  |
| hsa-mir-34a | TMEFF1     | -0.55 |

|             |           |       |
|-------------|-----------|-------|
| hsa-mir-34a | TMEM22    | 0.27  |
| hsa-mir-34a | TMEM51    | 0.49  |
| hsa-mir-34a | TMEM71    | 0.42  |
| hsa-mir-34a | TMEPAI    | 0.45  |
| hsa-mir-34a | TMSL8     | -0.37 |
| hsa-mir-34a | TNFRSF10B | 0.64  |
| hsa-mir-34a | TNFRSF10C | 0.49  |
| hsa-mir-34a | TNFRSF14  | 0.5   |
| hsa-mir-34a | TNFRSF1A  | 0.58  |
| hsa-mir-34a | TNFSF4    | 0.44  |
| hsa-mir-34a | TOP2A     | -0.25 |
| hsa-mir-34a | TOX3      | -0.53 |
| hsa-mir-34a | TRIM22    | 0.49  |
| hsa-mir-34a | TRIP4     | 0.46  |
| hsa-mir-34a | TRIP6     | 0.59  |
| hsa-mir-34a | TRPM4     | 0.47  |
| hsa-mir-34a | TTC12     | 0.45  |
| hsa-mir-34a | TTC7A     | 0.52  |
| hsa-mir-34a | TTK       | -0.26 |
| hsa-mir-34a | UACA      | 0.43  |
| hsa-mir-34a | USP49     | -0.43 |
| hsa-mir-34a | VAMP5     | 0.45  |
| hsa-mir-34a | VASN      | 0.47  |
| hsa-mir-34a | VAV3      | 0.45  |
| hsa-mir-34a | WASF1     | -0.51 |
| hsa-mir-34a | WDR63     | 0.43  |
| hsa-mir-34a | XKR8      | 0.52  |
| hsa-mir-34a | XYLT2     | 0.48  |
| hsa-mir-34a | YPEL1     | -0.49 |
| hsa-mir-34a | ZFP36     | 0.42  |
| hsa-mir-34a | ZNF239    | -0.4  |
| hsa-mir-34a | ZNF32     | -0.43 |
| hsa-mir-34a | ZNF519    | -0.47 |
| hsa-mir-34b | ABCC3     | 0.55  |
| hsa-mir-34b | ACOX2     | 0.49  |
| hsa-mir-34b | ANXA1     | 0.53  |
| hsa-mir-34b | APLP2     | 0.42  |
| hsa-mir-34b | APOBEC3C  | 0.53  |
| hsa-mir-34b | APOBEC3F  | 0.55  |
| hsa-mir-34b | ARSJ      | 0.52  |
| hsa-mir-34b | BCL3      | 0.44  |
| hsa-mir-34b | C13orf18  | 0.48  |
| hsa-mir-34b | C1QTNF1   | 0.36  |
| hsa-mir-34b | C1RL      | 0.47  |
| hsa-mir-34b | C21orf62  | 0.49  |
| hsa-mir-34b | C5orf29   | 0.52  |
| hsa-mir-34b | CA12      | 0.47  |
| hsa-mir-34b | CAPN2     | 0.49  |
| hsa-mir-34b | CAST      | 0.52  |
| hsa-mir-34b | CD93      | 0.41  |
| hsa-mir-34b | CDKN1A    | 0.57  |
| hsa-mir-34b | CEBPD     | 0.44  |
| hsa-mir-34b | CEBPE     | 0.5   |

|             |           |       |
|-------------|-----------|-------|
| hsa-mir-34b | CHI3L1    | 0.47  |
| hsa-mir-34b | CIITA     | 0.45  |
| hsa-mir-34b | CLEC5A    | 0.51  |
| hsa-mir-34b | CMKLR1    | 0.38  |
| hsa-mir-34b | CMYA5     | 0.51  |
| hsa-mir-34b | COL5A3    | 0.4   |
| hsa-mir-34b | COL8A2    | 0.49  |
| hsa-mir-34b | COX7A2    | -0.36 |
| hsa-mir-34b | CYP4V2    | 0.48  |
| hsa-mir-34b | DBX2      | 0.44  |
| hsa-mir-34b | DDB2      | 0.48  |
| hsa-mir-34b | DDIT4L    | 0.4   |
| hsa-mir-34b | DDO       | 0.33  |
| hsa-mir-34b | DPYD      | 0.47  |
| hsa-mir-34b | DRAM      | 0.55  |
| hsa-mir-34b | EFEMP1    | 0.48  |
| hsa-mir-34b | EMP3      | 0.42  |
| hsa-mir-34b | ETV7      | 0.46  |
| hsa-mir-34b | EYA2      | 0.34  |
| hsa-mir-34b | F11R      | 0.45  |
| hsa-mir-34b | F3        | 0.43  |
| hsa-mir-34b | FAM19A3   | 0.36  |
| hsa-mir-34b | FAM77C    | -0.51 |
| hsa-mir-34b | FANCB     | -0.4  |
| hsa-mir-34b | FAS       | 0.49  |
| hsa-mir-34b | FCGR2B    | 0.46  |
| hsa-mir-34b | FES       | 0.48  |
| hsa-mir-34b | FGF1      | 0.51  |
| hsa-mir-34b | FLJ11286  | 0.43  |
| hsa-mir-34b | FLJ20273  | 0.55  |
| hsa-mir-34b | FLJ21963  | 0.49  |
| hsa-mir-34b | FMO4      | 0.48  |
| hsa-mir-34b | FSD1      | -0.48 |
| hsa-mir-34b | GAB3      | 0.43  |
| hsa-mir-34b | GDF15     | 0.46  |
| hsa-mir-34b | GLRA3     | -0.39 |
| hsa-mir-34b | GLYATL1   | -0.12 |
| hsa-mir-34b | GNG4      | -0.52 |
| hsa-mir-34b | HIST1H4C  | -0.34 |
| hsa-mir-34b | HRASLS3   | 0.39  |
| hsa-mir-34b | IL1RAP    | 0.37  |
| hsa-mir-34b | ISL1      | -0.41 |
| hsa-mir-34b | ITGB5     | 0.41  |
| hsa-mir-34b | LAMA2     | 0.5   |
| hsa-mir-34b | LCTL      | 0.42  |
| hsa-mir-34b | LGALS3    | 0.4   |
| hsa-mir-34b | LINCR     | 0.37  |
| hsa-mir-34b | LMO2      | 0.46  |
| hsa-mir-34b | LOC162073 | 0.42  |
| hsa-mir-34b | LOC644186 | 0.37  |
| hsa-mir-34b | METTL7B   | 0.48  |
| hsa-mir-34b | MEX3A     | -0.38 |
| hsa-mir-34b | MGC20983  | 0.42  |

|             |            |       |
|-------------|------------|-------|
| hsa-mir-34b | MICALL2    | 0.45  |
| hsa-mir-34b | MMP12      | -0.15 |
| hsa-mir-34b | MST150     | 0.51  |
| hsa-mir-34b | MT1B       | 0.49  |
| hsa-mir-34b | MT1E       | 0.43  |
| hsa-mir-34b | MT1G       | 0.46  |
| hsa-mir-34b | MT1H       | 0.5   |
| hsa-mir-34b | MT1JP      | 0.47  |
| hsa-mir-34b | MT1X       | 0.46  |
| hsa-mir-34b | MT2A       | 0.48  |
| hsa-mir-34b | NOTCH2NL   | 0.49  |
| hsa-mir-34b | ORC6L      | -0.39 |
| hsa-mir-34b | OSBPL3     | 0.48  |
| hsa-mir-34b | OXTR       | 0.4   |
| hsa-mir-34b | PADI2      | 0.35  |
| hsa-mir-34b | PBK        | -0.15 |
| hsa-mir-34b | PHLDA3     | 0.49  |
| hsa-mir-34b | PLA2G5     | 0.49  |
| hsa-mir-34b | PLK3       | 0.48  |
| hsa-mir-34b | PMP22      | 0.47  |
| hsa-mir-34b | POSTN      | 0.31  |
| hsa-mir-34b | PTGS1      | 0.4   |
| hsa-mir-34b | PTRF       | 0.49  |
| hsa-mir-34b | PYGL       | 0.49  |
| hsa-mir-34b | RCAN3      | 0.41  |
| hsa-mir-34b | RGS22      | 0.11  |
| hsa-mir-34b | RNASE3     | 0.46  |
| hsa-mir-34b | RNF135     | 0.58  |
| hsa-mir-34b | RPGRIP1    | 0.4   |
| hsa-mir-34b | RRM2B      | 0.53  |
| hsa-mir-34b | S100A16    | 0.48  |
| hsa-mir-34b | SAMD9L     | 0.45  |
| hsa-mir-34b | SAT1       | 0.44  |
| hsa-mir-34b | SIPA1      | 0.43  |
| hsa-mir-34b | SOX4       | -0.39 |
| hsa-mir-34b | SPATA18    | 0.37  |
| hsa-mir-34b | STEAP3     | 0.52  |
| hsa-mir-34b | STMN1      | -0.52 |
| hsa-mir-34b | SUMF1      | 0.51  |
| hsa-mir-34b | SWAP70     | 0.53  |
| hsa-mir-34b | tcag7.1314 | 0.48  |
| hsa-mir-34b | TCEA3      | 0.52  |
| hsa-mir-34b | TCTEX1D1   | 0.44  |
| hsa-mir-34b | TEKT1      | 0.4   |
| hsa-mir-34b | TFCP2L1    | 0.51  |
| hsa-mir-34b | TIMP1      | 0.48  |
| hsa-mir-34b | TLR5       | 0.48  |
| hsa-mir-34b | TMEFF1     | -0.49 |
| hsa-mir-34b | TMEM154    | 0.48  |
| hsa-mir-34b | TMEM71     | 0.39  |
| hsa-mir-34b | TMSL8      | -0.33 |
| hsa-mir-34b | TNFRSF10B  | 0.57  |
| hsa-mir-34b | TPP1       | 0.47  |



|             |              |       |
|-------------|--------------|-------|
| hsa-mir-34b | TRIM22       | 0.5   |
| hsa-mir-34b | TRIM6        | 0.44  |
| hsa-mir-34b | TRIM6-TRIM34 | 0.5   |
| hsa-mir-34b | TTC12        | 0.44  |
| hsa-mir-34b | TTC7A        | 0.51  |
| hsa-mir-34b | USP53        | 0.4   |
| hsa-mir-34b | VAV3         | 0.4   |
| hsa-mir-34b | WDFY4        | 0.45  |
| hsa-mir-34b | WDR63        | 0.58  |
| hsa-mir-34b | XKR8         | 0.51  |
| hsa-mir-34b | XYLT2        | 0.44  |
| hsa-mir-34b | ZMYND15      | 0.52  |
| hsa-mir-34c | ACSM2B       | -0.43 |
| hsa-mir-34c | ACTBL1       | -0.44 |
| hsa-mir-34c | ACTL8        | -0.44 |
| hsa-mir-34c | AKAP14       | 0.48  |
| hsa-mir-34c | AKAP3        | 0.23  |
| hsa-mir-34c | ALB          | -0.41 |
| hsa-mir-34c | ALS2CR12     | 0.41  |
| hsa-mir-34c | AMHR2        | -0.49 |
| hsa-mir-34c | APOA5        | -0.45 |
| hsa-mir-34c | APOH         | -0.37 |
| hsa-mir-34c | ARMC4        | 0.18  |
| hsa-mir-34c | ART4         | -0.49 |
| hsa-mir-34c | ASPN         | 0.4   |
| hsa-mir-34c | ATAD4        | -0.42 |
| hsa-mir-34c | AURKC        | -0.33 |
| hsa-mir-34c | BAAT         | -0.49 |
| hsa-mir-34c | BAIAP2L1     | -0.43 |
| hsa-mir-34c | C10orf122    | -0.46 |
| hsa-mir-34c | C10orf63     | 0.41  |
| hsa-mir-34c | C10orf79     | 0.48  |
| hsa-mir-34c | C14orf73     | -0.43 |
| hsa-mir-34c | C15orf26     | 0.17  |
| hsa-mir-34c | C16orf73     | -0.47 |
| hsa-mir-34c | C18orf2      | -0.51 |
| hsa-mir-34c | C18orf34     | 0.4   |
| hsa-mir-34c | C1orf192     | 0.37  |
| hsa-mir-34c | C4BPA        | -0.21 |
| hsa-mir-34c | C6orf165     | 0.48  |
| hsa-mir-34c | C8A          | -0.46 |
| hsa-mir-34c | C8B          | -0.42 |
| hsa-mir-34c | CALML5       | -0.42 |
| hsa-mir-34c | CASC1        | 0.46  |
| hsa-mir-34c | CCDC11       | 0.52  |
| hsa-mir-34c | CCDC135      | 0.44  |
| hsa-mir-34c | CCDC37       | 0.33  |
| hsa-mir-34c | CCDC40       | 0.43  |
| hsa-mir-34c | CCRL1        | 0.43  |
| hsa-mir-34c | CD163        | 0.32  |
| hsa-mir-34c | CDH16        | -0.49 |
| hsa-mir-34c | CEACAM5      | -0.47 |
| hsa-mir-34c | CEACAM6      | -0.39 |

|             |          |       |
|-------------|----------|-------|
| hsa-mir-34c | CLCA2    | -0.38 |
| hsa-mir-34c | CLDN6    | -0.47 |
| hsa-mir-34c | COL2A1   | -0.41 |
| hsa-mir-34c | CPB2     | -0.42 |
| hsa-mir-34c | CPN1     | -0.43 |
| hsa-mir-34c | CREB3L3  | -0.48 |
| hsa-mir-34c | CRTAM    | 0.43  |
| hsa-mir-34c | CRYBA1   | -0.11 |
| hsa-mir-34c | CTCFL    | -0.42 |
| hsa-mir-34c | CYP2F1   | -0.49 |
| hsa-mir-34c | DMRTA1   | -0.05 |
| hsa-mir-34c | DNAH7    | 0.46  |
| hsa-mir-34c | DNAI2    | 0.44  |
| hsa-mir-34c | DNMT3L   | -0.43 |
| hsa-mir-34c | DSCR8    | -0.41 |
| hsa-mir-34c | EFHC2    | 0.39  |
| hsa-mir-34c | ELA3A    | -0.35 |
| hsa-mir-34c | ELTD1    | 0.39  |
| hsa-mir-34c | ESX1     | -0.45 |
| hsa-mir-34c | F3       | 0.39  |
| hsa-mir-34c | FAM81B   | 0.46  |
| hsa-mir-34c | FAM83A   | -0.5  |
| hsa-mir-34c | FAM83B   | -0.45 |
| hsa-mir-34c | FAM92B   | 0.45  |
| hsa-mir-34c | FAM9B    | -0.47 |
| hsa-mir-34c | FBXL21   | -0.49 |
| hsa-mir-34c | FBXO15   | 0.36  |
| hsa-mir-34c | FGA      | -0.42 |
| hsa-mir-34c | FGB      | -0.4  |
| hsa-mir-34c | FGF1     | 0.41  |
| hsa-mir-34c | FGF23    | -0.38 |
| hsa-mir-34c | FGG      | -0.39 |
| hsa-mir-34c | FGL2     | 0.42  |
| hsa-mir-34c | FLJ21075 | -0.49 |
| hsa-mir-34c | FLJ23049 | 0.35  |
| hsa-mir-34c | FLJ34047 | -0.44 |
| hsa-mir-34c | FLJ36208 | -0.28 |
| hsa-mir-34c | FLJ40298 | 0.53  |
| hsa-mir-34c | FLJ46266 | 0.46  |
| hsa-mir-34c | FMO4     | 0.48  |
| hsa-mir-34c | FOXA1    | -0.3  |
| hsa-mir-34c | FTCD     | -0.45 |
| hsa-mir-34c | GCNT3    | -0.41 |
| hsa-mir-34c | GFI1B    | -0.5  |
| hsa-mir-34c | GJB7     | -0.52 |
| hsa-mir-34c | GLRA3    | -0.36 |
| hsa-mir-34c | GPR75    | 0.48  |
| hsa-mir-34c | GPX2     | -0.41 |
| hsa-mir-34c | GSTA3    | -0.4  |
| hsa-mir-34c | GSTA5    | -0.32 |
| hsa-mir-34c | GYPB     | -0.52 |
| hsa-mir-34c | GYPE     | -0.52 |
| hsa-mir-34c | GZMK     | 0.4   |

|             |           |       |
|-------------|-----------|-------|
| hsa-mir-34c | HAND1     | -0.53 |
| hsa-mir-34c | HBG2      | -0.39 |
| hsa-mir-34c | HFE2      | -0.44 |
| hsa-mir-34c | HORMAD1   | -0.31 |
| hsa-mir-34c | HORMAD2   | 0.5   |
| hsa-mir-34c | HOXB9     | -0.3  |
| hsa-mir-34c | IGF2BP1   | -0.4  |
| hsa-mir-34c | IGLV2-14  | -0.47 |
| hsa-mir-34c | IGSF6     | 0.36  |
| hsa-mir-34c | IL11      | -0.27 |
| hsa-mir-34c | IL23R     | -0.46 |
| hsa-mir-34c | INSL5     | 0.57  |
| hsa-mir-34c | KCNG3     | -0.48 |
| hsa-mir-34c | KCNMB1    | 0.48  |
| hsa-mir-34c | KIAA1086  | -0.28 |
| hsa-mir-34c | KIAA1383  | 0.36  |
| hsa-mir-34c | KIFC3     | -0.36 |
| hsa-mir-34c | KLF1      | -0.47 |
| hsa-mir-34c | KLRB1     | 0.44  |
| hsa-mir-34c | KRT12     | -0.41 |
| hsa-mir-34c | KRT16     | -0.4  |
| hsa-mir-34c | KRT33A    | -0.47 |
| hsa-mir-34c | KRT37     | -0.48 |
| hsa-mir-34c | KRT6C     | -0.47 |
| hsa-mir-34c | KRT86     | -0.5  |
| hsa-mir-34c | KRTAP1-5  | -0.42 |
| hsa-mir-34c | KRTAP3-1  | -0.45 |
| hsa-mir-34c | LCT       | -0.45 |
| hsa-mir-34c | LDHC      | -0.15 |
| hsa-mir-34c | LDLRAD1   | -0.47 |
| hsa-mir-34c | LHFPL3    | 0.04  |
| hsa-mir-34c | LOC136288 | 0.44  |
| hsa-mir-34c | LOC283152 | 0.47  |
| hsa-mir-34c | LOC441601 | -0.49 |
| hsa-mir-34c | LRRC51    | 0.35  |
| hsa-mir-34c | LRRC6     | 0.45  |
| hsa-mir-34c | LRRIQ1    | 0.1   |
| hsa-mir-34c | LTB4R     | -0.47 |
| hsa-mir-34c | MAEL      | 0.33  |
| hsa-mir-34c | MAGEA8    | -0.48 |
| hsa-mir-34c | MAGEA9    | -0.38 |
| hsa-mir-34c | MAGEB6    | -0.43 |
| hsa-mir-34c | MAGEC1    | -0.42 |
| hsa-mir-34c | MAGEC2    | -0.31 |
| hsa-mir-34c | MAK       | 0.45  |
| hsa-mir-34c | MAPK12    | -0.45 |
| hsa-mir-34c | MDM1      | 0.39  |
| hsa-mir-34c | MFAP3L    | 0.34  |
| hsa-mir-34c | MGC3771   | 0.4   |
| hsa-mir-34c | MIRH1     | -0.4  |
| hsa-mir-34c | MMRN1     | 0.4   |
| hsa-mir-34c | MPEG1     | 0.39  |
| hsa-mir-34c | MRGPRX3   | -0.45 |

|             |             |       |
|-------------|-------------|-------|
| hsa-mir-34c | MS4A1       | -0.36 |
| hsa-mir-34c | MS4A3       | -0.48 |
| hsa-mir-34c | MSMB        | -0.48 |
| hsa-mir-34c | MSX2        | -0.27 |
| hsa-mir-34c | MTMR8       | -0.45 |
| hsa-mir-34c | MUC15       | -0.35 |
| hsa-mir-34c | MYCBPAP     | 0.53  |
| hsa-mir-34c | MYL7        | -0.49 |
| hsa-mir-34c | MYLC2PL     | -0.41 |
| hsa-mir-34c | MYPN        | -0.38 |
| hsa-mir-34c | NAT8        | -0.44 |
| hsa-mir-34c | NME5        | 0.39  |
| hsa-mir-34c | NOTUM       | -0.37 |
| hsa-mir-34c | NRG4        | -0.46 |
| hsa-mir-34c | NTF3        | -0.35 |
| hsa-mir-34c | ODAM        | -0.4  |
| hsa-mir-34c | OR1D2       | -0.58 |
| hsa-mir-34c | OR2T2       | 0.46  |
| hsa-mir-34c | OR51B5      | -0.48 |
| hsa-mir-34c | OR51I1      | -0.46 |
| hsa-mir-34c | PAGE1       | -0.41 |
| hsa-mir-34c | PAPPA       | -0.23 |
| hsa-mir-34c | PDILT       | -0.45 |
| hsa-mir-34c | PIAS4       | -0.44 |
| hsa-mir-34c | PITX2       | -0.04 |
| hsa-mir-34c | PIWIL2      | -0.48 |
| hsa-mir-34c | PNLIPRP2    | -0.41 |
| hsa-mir-34c | PRAP1       | -0.47 |
| hsa-mir-34c | PRDM7       | -0.43 |
| hsa-mir-34c | PRDM9       | -0.49 |
| hsa-mir-34c | PRSS1       | -0.53 |
| hsa-mir-34c | PRSS2       | -0.51 |
| hsa-mir-34c | PRSS3       | -0.44 |
| hsa-mir-34c | PSG6        | -0.46 |
| hsa-mir-34c | PTGFR       | -0.32 |
| hsa-mir-34c | RAET1E      | -0.43 |
| hsa-mir-34c | RFTN2       | 0.27  |
| hsa-mir-34c | RHOV        | -0.45 |
| hsa-mir-34c | RIBC1       | 0.48  |
| hsa-mir-34c | RP4-692D3.1 | 0.45  |
| hsa-mir-34c | RSHL3       | 0.47  |
| hsa-mir-34c | RTDR1       | 0.36  |
| hsa-mir-34c | S100A2      | 0.56  |
| hsa-mir-34c | SERPINA10   | -0.38 |
| hsa-mir-34c | SERPINA11   | -0.46 |
| hsa-mir-34c | SERPINA4    | -0.48 |
| hsa-mir-34c | SERPINA6    | -0.42 |
| hsa-mir-34c | SERPINB2    | -0.4  |
| hsa-mir-34c | SERPINB3    | -0.46 |
| hsa-mir-34c | SERPINB4    | -0.46 |
| hsa-mir-34c | SERPINB5    | -0.44 |
| hsa-mir-34c | SERPINI2    | 0.47  |
| hsa-mir-34c | SLAMF8      | 0.45  |

|             |          |       |
|-------------|----------|-------|
| hsa-mir-34c | SLC17A2  | -0.51 |
| hsa-mir-34c | SLC1A6   | -0.4  |
| hsa-mir-34c | SLC44A4  | -0.45 |
| hsa-mir-34c | SLC45A2  | -0.54 |
| hsa-mir-34c | SLC6A4   | -0.48 |
| hsa-mir-34c | SLC9A11  | 0.39  |
| hsa-mir-34c | SPAG17   | 0.49  |
| hsa-mir-34c | SPATA4   | 0.46  |
| hsa-mir-34c | SPINK5   | -0.44 |
| hsa-mir-34c | SPRR1B   | -0.56 |
| hsa-mir-34c | SPRR2D   | -0.45 |
| hsa-mir-34c | SPTA1    | -0.27 |
| hsa-mir-34c | SSX1     | -0.51 |
| hsa-mir-34c | SSX7     | -0.46 |
| hsa-mir-34c | STGC3    | -0.34 |
| hsa-mir-34c | STOML3   | 0.39  |
| hsa-mir-34c | SULT1C4  | 0.56  |
| hsa-mir-34c | SULT2A1  | -0.44 |
| hsa-mir-34c | TCTEX1D1 | 0.49  |
| hsa-mir-34c | TEKT1    | 0.46  |
| hsa-mir-34c | TERT     | -0.43 |
| hsa-mir-34c | TMED6    | -0.34 |
| hsa-mir-34c | TMEM16J  | -0.42 |
| hsa-mir-34c | TMEM190  | 0.12  |
| hsa-mir-34c | TMEM63A  | -0.36 |
| hsa-mir-34c | TMPRSS4  | -0.42 |
| hsa-mir-34c | TP53TG3  | -0.31 |
| hsa-mir-34c | TRIM15   | -0.39 |
| hsa-mir-34c | TRIM49   | -0.44 |
| hsa-mir-34c | TRPM1    | -0.54 |
| hsa-mir-34c | TSGA10   | 0.47  |
| hsa-mir-34c | TSPY2    | -0.46 |
| hsa-mir-34c | TTC30B   | 0.47  |
| hsa-mir-34c | UGT2B28  | -0.51 |
| hsa-mir-34c | UGT2B4   | -0.43 |
| hsa-mir-34c | UNC93A   | -0.49 |
| hsa-mir-34c | UTS2     | -0.23 |
| hsa-mir-34c | VIL1     | -0.45 |
| hsa-mir-34c | WDR63    | 0.62  |
| hsa-mir-34c | YSK4     | 0.37  |
| hsa-mir-34c | ZMYND10  | 0.44  |
| hsa-mir-34c | ZMYND12  | 0.49  |
| hsa-mir-34c | ZNF366   | 0.4   |
| hsa-mir-34c | ZNF396   | 0.49  |
| hsa-mir-361 | C9orf47  | -0.31 |
| hsa-mir-361 | CABP7    | -0.24 |
| hsa-mir-361 | CGB1     | -0.24 |
| hsa-mir-361 | FLJ38723 | -0.24 |
| hsa-mir-361 | IGKV1-5  | -0.25 |
| hsa-mir-361 | SAPS1    | -0.3  |
| hsa-mir-361 | SLCO2B1  | -0.23 |
| hsa-mir-361 | TFEC     | -0.25 |
| hsa-mir-361 | VPS18    | -0.26 |

|              |           |       |
|--------------|-----------|-------|
| hsa-mir-362  | C3        | -0.18 |
| hsa-mir-362  | CLCN5     | 0.44  |
| hsa-mir-362  | CLGN      | 0.19  |
| hsa-mir-362  | HIST1H2AK | 0.21  |
| hsa-mir-362  | PDE4B     | -0.31 |
| hsa-mir-362  | PIR       | 0.21  |
| hsa-mir-363  | AGPAT2    | -0.33 |
| hsa-mir-363  | AZI1      | 0.3   |
| hsa-mir-363  | C13orf33  | -0.31 |
| hsa-mir-363  | CCL7      | -0.27 |
| hsa-mir-363  | CEBPE     | -0.42 |
| hsa-mir-363  | CLEC2B    | -0.27 |
| hsa-mir-363  | CLGN      | 0.23  |
| hsa-mir-363  | COL13A1   | -0.23 |
| hsa-mir-363  | CPA3      | -0.35 |
| hsa-mir-363  | DNAJB5    | 0.29  |
| hsa-mir-363  | EMP1      | -0.23 |
| hsa-mir-363  | F13A1     | -0.38 |
| hsa-mir-363  | GLCCI1    | 0.31  |
| hsa-mir-363  | HIST1H4C  | 0.32  |
| hsa-mir-363  | ITM2A     | 0.4   |
| hsa-mir-363  | KLHL23    | 0.44  |
| hsa-mir-363  | MCM3APAS  | 0.27  |
| hsa-mir-363  | METRNL    | -0.43 |
| hsa-mir-363  | MEX3A     | 0.37  |
| hsa-mir-363  | MYLK2     | 0.38  |
| hsa-mir-363  | NCAN      | 0.14  |
| hsa-mir-363  | RNF149    | -0.34 |
| hsa-mir-363  | SALL3     | 0.29  |
| hsa-mir-363  | SOX2      | 0.42  |
| hsa-mir-363  | SPINK5    | 0.23  |
| hsa-mir-363  | SRPX2     | -0.29 |
| hsa-mir-363  | SYTL2     | -0.35 |
| hsa-mir-363  | TMEM45B   | 0.39  |
| hsa-mir-363  | TMSL8     | 0.29  |
| hsa-mir-363* | MST1      | 0.23  |
| hsa-mir-363* | STAP1     | -0.23 |
| hsa-mir-363* | STELLAR   | 0.29  |
| hsa-mir-363* | UCN       | 0.26  |
| hsa-mir-365  | AK3       | 0.07  |
| hsa-mir-365  | ARHGAP29  | 0.15  |
| hsa-mir-365  | ARID5B    | 0.19  |
| hsa-mir-365  | ATP10D    | 0.11  |
| hsa-mir-365  | CENTB2    | 0.13  |
| hsa-mir-365  | CYTL1     | -0.23 |
| hsa-mir-365  | EAF2      | 0.16  |
| hsa-mir-365  | ENPP5     | 0.09  |
| hsa-mir-365  | FLJ36031  | 0.08  |
| hsa-mir-365  | GHR       | 0.08  |
| hsa-mir-365  | HSZFP36   | -0.14 |
| hsa-mir-365  | KCNE2     | -0.02 |
| hsa-mir-365  | LMO3      | 0.03  |
| hsa-mir-365  | NEBL      | 0.03  |

|             |          |       |
|-------------|----------|-------|
| hsa-mir-365 | PCDHGB6  | -0.04 |
| hsa-mir-365 | PLCD4    | 0.04  |
| hsa-mir-365 | PROK2    | 0     |
| hsa-mir-365 | TFAP2C   | -0.01 |
| hsa-mir-368 | ATOH8    | 0.08  |
| hsa-mir-368 | CYP3A5   | -0.08 |
| hsa-mir-368 | CYP3A7   | -0.08 |
| hsa-mir-368 | DAO      | -0.28 |
| hsa-mir-368 | DLK1     | 0.25  |
| hsa-mir-368 | DOK6     | 0.16  |
| hsa-mir-368 | GYG2     | -0.11 |
| hsa-mir-368 | HSPB3    | 0.11  |
| hsa-mir-368 | KIAA1086 | 0.28  |
| hsa-mir-368 | KLHL4    | -0.11 |
| hsa-mir-368 | MAGEC2   | 0.08  |
| hsa-mir-368 | MEG3     | 0.56  |
| hsa-mir-368 | PMAIP1   | -0.06 |
| hsa-mir-368 | S100A2   | -0.27 |
| hsa-mir-368 | SCGB2A1  | 0.01  |
| hsa-mir-368 | SERPINB3 | 0.17  |
| hsa-mir-368 | SERPINB4 | 0.2   |
| hsa-mir-368 | TMEM63A  | 0.1   |
| hsa-mir-368 | ZMAT4    | 0.28  |
| hsa-mir-368 | ZNF423   | -0.03 |
| hsa-mir-370 | ADAMDEC1 | 0.15  |
| hsa-mir-370 | AGXT2L1  | -0.15 |
| hsa-mir-370 | ARHGAP22 | 0.21  |
| hsa-mir-370 | ARHGAP29 | 0.22  |
| hsa-mir-370 | ARMC3    | 0.05  |
| hsa-mir-370 | ASPN     | 0.27  |
| hsa-mir-370 | BCL2A1   | 0.22  |
| hsa-mir-370 | C3orf41  | 0.13  |
| hsa-mir-370 | C9orf47  | 0.5   |
| hsa-mir-370 | CA3      | 0.14  |
| hsa-mir-370 | CA8      | -0.11 |
| hsa-mir-370 | CABP7    | 0.36  |
| hsa-mir-370 | CAMP     | 0.22  |
| hsa-mir-370 | CCL26    | 0.18  |
| hsa-mir-370 | CCL7     | 0.2   |
| hsa-mir-370 | CD1E     | -0.08 |
| hsa-mir-370 | CD86     | 0.5   |
| hsa-mir-370 | CGB1     | 0.29  |
| hsa-mir-370 | COL14A1  | 0.24  |
| hsa-mir-370 | COL1A1   | 0.35  |
| hsa-mir-370 | COL4A2   | 0.22  |
| hsa-mir-370 | COL5A1   | 0.31  |
| hsa-mir-370 | COL6A3   | 0.34  |
| hsa-mir-370 | CTHRC1   | 0.24  |
| hsa-mir-370 | CXCL1    | 0.16  |
| hsa-mir-370 | CXCL9    | 0.24  |
| hsa-mir-370 | CXXC4    | -0.2  |
| hsa-mir-370 | DACT2    | -0.02 |
| hsa-mir-370 | DEFA3    | 0.2   |

|             |           |       |
|-------------|-----------|-------|
| hsa-mir-370 | DPP4      | 0.13  |
| hsa-mir-370 | FABP5     | 0.19  |
| hsa-mir-370 | FABP7     | 0.09  |
| hsa-mir-370 | FAM123A   | -0.07 |
| hsa-mir-370 | FAM46B    | 0.24  |
| hsa-mir-370 | FLJ37357  | 0.01  |
| hsa-mir-370 | FLJ38723  | 0.36  |
| hsa-mir-370 | FLJ44379  | -0.02 |
| hsa-mir-370 | FLJ45557  | 0.04  |
| hsa-mir-370 | FREM1     | -0.1  |
| hsa-mir-370 | GDPD1     | -0.22 |
| hsa-mir-370 | GPNMB     | 0.19  |
| hsa-mir-370 | GZMK      | 0.31  |
| hsa-mir-370 | HIST1H2BA | 0.12  |
| hsa-mir-370 | HSPA1A    | 0.24  |
| hsa-mir-370 | IBSP      | 0.23  |
| hsa-mir-370 | IFIT1     | -0.08 |
| hsa-mir-370 | IGKV1-5   | 0.29  |
| hsa-mir-370 | IL13RA2   | -0.05 |
| hsa-mir-370 | IL33      | 0.09  |
| hsa-mir-370 | IL8       | 0.14  |
| hsa-mir-370 | IRX5      | 0.28  |
| hsa-mir-370 | LEFTY2    | 0.07  |
| hsa-mir-370 | LEMD1     | -0.02 |
| hsa-mir-370 | LOX       | 0.24  |
| hsa-mir-370 | LTF       | 0.22  |
| hsa-mir-370 | LUZP2     | -0.17 |
| hsa-mir-370 | MAGEC2    | -0.1  |
| hsa-mir-370 | MCHR1     | 0.03  |
| hsa-mir-370 | MMP9      | 0.14  |
| hsa-mir-370 | MS4A4A    | 0.27  |
| hsa-mir-370 | NGFR      | 0.13  |
| hsa-mir-370 | NMU       | -0.07 |
| hsa-mir-370 | NPTX2     | 0.02  |
| hsa-mir-370 | NUDT11    | -0.32 |
| hsa-mir-370 | OLIG1     | -0.2  |
| hsa-mir-370 | OVOS2     | -0.07 |
| hsa-mir-370 | PCSK4     | 0.38  |
| hsa-mir-370 | PDGFRA    | -0.07 |
| hsa-mir-370 | PDZK1IP1  | 0.24  |
| hsa-mir-370 | PERP      | 0.12  |
| hsa-mir-370 | PHEX      | 0     |
| hsa-mir-370 | PI3       | 0.22  |
| hsa-mir-370 | PITX2     | 0     |
| hsa-mir-370 | PLA2G2A   | 0.2   |
| hsa-mir-370 | POSTN     | 0.22  |
| hsa-mir-370 | PPBP      | 0.29  |
| hsa-mir-370 | RASEF     | 0.1   |
| hsa-mir-370 | RETN      | 0.29  |
| hsa-mir-370 | RPS4Y1    | 0.05  |
| hsa-mir-370 | S100A4    | 0.3   |
| hsa-mir-370 | SAA1      | 0.2   |
| hsa-mir-370 | SAPS1     | 0.49  |



|              |          |       |
|--------------|----------|-------|
| hsa-mir-370  | SDPR     | -0.06 |
| hsa-mir-370  | SEC61G   | 0.16  |
| hsa-mir-370  | SFRP2    | 0.16  |
| hsa-mir-370  | SLC27A6  | 0.13  |
| hsa-mir-370  | SLPI     | 0.22  |
| hsa-mir-370  | SPRY1    | 0.16  |
| hsa-mir-370  | TBC1D3P2 | -0.1  |
| hsa-mir-370  | TMEM100  | -0.11 |
| hsa-mir-370  | TMEM16C  | -0.13 |
| hsa-mir-370  | TRH      | 0.21  |
| hsa-mir-370  | TRPC4    | 0     |
| hsa-mir-370  | VPS18    | 0.38  |
| hsa-mir-370  | VWC2     | -0.1  |
| hsa-mir-370  | WIT1     | 0.11  |
| hsa-mir-370  | WNT3     | -0.08 |
| hsa-mir-370  | ZFP36    | 0.16  |
| hsa-mir-373* | AREG     | 0.05  |
| hsa-mir-373* | KCNE4    | 0.19  |
| hsa-mir-374  | C9orf47  | -0.35 |
| hsa-mir-374  | CDH19    | -0.09 |
| hsa-mir-374  | CLEC2B   | -0.21 |
| hsa-mir-374  | CYP1B1   | -0.3  |
| hsa-mir-374  | FABP5    | -0.13 |
| hsa-mir-374  | GPNMB    | -0.17 |
| hsa-mir-374  | HIST1H1C | 0.02  |
| hsa-mir-374  | LRRC2    | -0.2  |
| hsa-mir-374  | PARD3    | 0.33  |
| hsa-mir-374  | PDGFRL   | -0.24 |
| hsa-mir-374  | PDSS1    | 0.22  |
| hsa-mir-376a | ADRA2C   | 0.28  |
| hsa-mir-376a | ASS1     | 0.11  |
| hsa-mir-376a | BEGAIN   | 0.35  |
| hsa-mir-376a | C7orf16  | 0.13  |
| hsa-mir-376a | CCK      | 0.07  |
| hsa-mir-376a | CD38     | -0.17 |
| hsa-mir-376a | CDH18    | 0.22  |
| hsa-mir-376a | CHST8    | 0.22  |
| hsa-mir-376a | CYP26B1  | 0.35  |
| hsa-mir-376a | CYP3A5   | -0.1  |
| hsa-mir-376a | DLEU7    | 0.24  |
| hsa-mir-376a | DLK1     | 0.23  |
| hsa-mir-376a | DSCR6    | 0.21  |
| hsa-mir-376a | FRAS1    | 0.28  |
| hsa-mir-376a | GABBR2   | 0.24  |
| hsa-mir-376a | GATM     | -0.04 |
| hsa-mir-376a | GPR137B  | -0.21 |
| hsa-mir-376a | KHDRBS2  | 0.18  |
| hsa-mir-376a | KIAA1086 | 0.38  |
| hsa-mir-376a | LINGO2   | 0.21  |
| hsa-mir-376a | MAGEC2   | 0.14  |
| hsa-mir-376a | MAL2     | 0.23  |
| hsa-mir-376a | MEG3     | 0.62  |
| hsa-mir-376a | MMP7     | -0.12 |

|              |           |       |
|--------------|-----------|-------|
| hsa-mir-376a | ODZ2      | 0.28  |
| hsa-mir-376a | PAQR9     | 0.27  |
| hsa-mir-376a | PEG3      | 0.27  |
| hsa-mir-376a | PIR       | -0.11 |
| hsa-mir-376a | PPP1R14C  | 0.21  |
| hsa-mir-376a | RNF128    | 0.26  |
| hsa-mir-376a | RPESP     | -0.02 |
| hsa-mir-376a | RYR2      | 0.26  |
| hsa-mir-376a | SHANK2    | 0.31  |
| hsa-mir-376a | TRAF5     | -0.17 |
| hsa-mir-376a | ZMAT4     | 0.33  |
| hsa-mir-376b | AMTN      | 0.06  |
| hsa-mir-376b | APOA5     | 0.09  |
| hsa-mir-376b | ARL14     | 0.02  |
| hsa-mir-376b | BAAT      | 0.15  |
| hsa-mir-376b | BMP5      | 0.14  |
| hsa-mir-376b | C10orf122 | 0.12  |
| hsa-mir-376b | C10orf63  | -0.24 |
| hsa-mir-376b | C14orf73  | 0.09  |
| hsa-mir-376b | C16orf73  | 0.11  |
| hsa-mir-376b | C18orf2   | 0.19  |
| hsa-mir-376b | C8A       | 0.13  |
| hsa-mir-376b | CASC1     | -0.21 |
| hsa-mir-376b | CTCFL     | 0.12  |
| hsa-mir-376b | DGAT2     | 0.19  |
| hsa-mir-376b | DLK1      | 0.25  |
| hsa-mir-376b | DNAH8     | 0.08  |
| hsa-mir-376b | DNMT3L    | 0.12  |
| hsa-mir-376b | DSCR6     | 0.23  |
| hsa-mir-376b | ELA3A     | 0.13  |
| hsa-mir-376b | FAM79B    | -0.17 |
| hsa-mir-376b | FBXL21    | 0.14  |
| hsa-mir-376b | FETUB     | 0.02  |
| hsa-mir-376b | FGB       | 0.08  |
| hsa-mir-376b | GSTA3     | 0.13  |
| hsa-mir-376b | GYPB      | 0.13  |
| hsa-mir-376b | GYPE      | 0.17  |
| hsa-mir-376b | HFE2      | 0.07  |
| hsa-mir-376b | HOXB9     | 0.06  |
| hsa-mir-376b | IGF2      | 0.32  |
| hsa-mir-376b | IGF2AS    | 0.33  |
| hsa-mir-376b | IL22RA1   | 0.18  |
| hsa-mir-376b | IL23R     | 0.13  |
| hsa-mir-376b | IRX2      | 0.12  |
| hsa-mir-376b | KLF8      | 0.05  |
| hsa-mir-376b | KLK8      | 0.07  |
| hsa-mir-376b | KRT16     | 0.23  |
| hsa-mir-376b | KRT37     | 0.07  |
| hsa-mir-376b | LDLRAD1   | 0.08  |
| hsa-mir-376b | LOC441601 | 0.11  |
| hsa-mir-376b | LOC91461  | 0.24  |
| hsa-mir-376b | MAGEA8    | 0.13  |
| hsa-mir-376b | MAGEC1    | 0.09  |

|              |           |       |
|--------------|-----------|-------|
| hsa-mir-376b | MAGEC2    | 0.02  |
| hsa-mir-376b | MAGEE2    | -0.18 |
| hsa-mir-376b | MAPK12    | 0.15  |
| hsa-mir-376b | MBL2      | 0.1   |
| hsa-mir-376b | MIRH1     | 0.17  |
| hsa-mir-376b | MS4A1     | 0.07  |
| hsa-mir-376b | MS4A3     | 0.1   |
| hsa-mir-376b | MSMB      | 0.11  |
| hsa-mir-376b | MTMR8     | 0.07  |
| hsa-mir-376b | MYL7      | 0.19  |
| hsa-mir-376b | NAT8      | 0.12  |
| hsa-mir-376b | NTF3      | 0.14  |
| hsa-mir-376b | OR1D2     | 0.14  |
| hsa-mir-376b | OR2T2     | -0.16 |
| hsa-mir-376b | OR51I1    | 0.1   |
| hsa-mir-376b | PNLIPRP2  | 0.19  |
| hsa-mir-376b | POTE15    | 0.15  |
| hsa-mir-376b | PRG2      | 0.13  |
| hsa-mir-376b | PRSS1     | 0.14  |
| hsa-mir-376b | RNF6      | -0.16 |
| hsa-mir-376b | SEC14L4   | 0.18  |
| hsa-mir-376b | SEMA3G    | 0.22  |
| hsa-mir-376b | SERPINA11 | 0.09  |
| hsa-mir-376b | SERPINA4  | 0.11  |
| hsa-mir-376b | SERPINA6  | 0.09  |
| hsa-mir-376b | SERPINB2  | 0.05  |
| hsa-mir-376b | SERPINB3  | 0.11  |
| hsa-mir-376b | SERPINB4  | 0.14  |
| hsa-mir-376b | SLC30A8   | 0.15  |
| hsa-mir-376b | SLC45A2   | 0.13  |
| hsa-mir-376b | SLC6A4    | 0.22  |
| hsa-mir-376b | SPINK4    | 0.05  |
| hsa-mir-376b | SPINK5    | 0.24  |
| hsa-mir-376b | SPRR1B    | 0.16  |
| hsa-mir-376b | SULT2A1   | 0.14  |
| hsa-mir-376b | TDGF1     | 0.04  |
| hsa-mir-376b | TERT      | 0.1   |
| hsa-mir-376b | TMEM63A   | 0.03  |
| hsa-mir-376b | TRPM1     | 0.12  |
| hsa-mir-376b | UGT2B28   | 0.1   |
| hsa-mir-376b | UTS2      | -0.05 |
| hsa-mir-376b | XKR3      | 0.08  |
| hsa-mir-377  | March11   | 0.46  |
| hsa-mir-377  | ANGPTL1   | -0.21 |
| hsa-mir-377  | ANKRD21   | 0.3   |
| hsa-mir-377  | AQP3      | 0.41  |
| hsa-mir-377  | ARMC4     | -0.01 |
| hsa-mir-377  | B3GNT4    | 0.43  |
| hsa-mir-377  | BAAT      | 0.42  |
| hsa-mir-377  | BDNF      | 0.27  |
| hsa-mir-377  | BEGAIN    | 0.4   |
| hsa-mir-377  | BOK       | 0.38  |
| hsa-mir-377  | C15orf48  | -0.25 |

|             |             |       |
|-------------|-------------|-------|
| hsa-mir-377 | C16orf73    | 0.37  |
| hsa-mir-377 | C21orf62    | -0.35 |
| hsa-mir-377 | C5orf39     | -0.26 |
| hsa-mir-377 | CAPN6       | 0.32  |
| hsa-mir-377 | CCDC48      | -0.22 |
| hsa-mir-377 | CCK         | 0.18  |
| hsa-mir-377 | CCKBR       | 0.45  |
| hsa-mir-377 | CDH18       | 0.33  |
| hsa-mir-377 | CDH9        | 0.43  |
| hsa-mir-377 | CHRM2       | 0.35  |
| hsa-mir-377 | CLECL1      | -0.43 |
| hsa-mir-377 | CLSTN3      | 0.46  |
| hsa-mir-377 | CRH         | 0.13  |
| hsa-mir-377 | CYP26B1     | 0.41  |
| hsa-mir-377 | DGAT2       | 0.38  |
| hsa-mir-377 | DRD5        | 0.37  |
| hsa-mir-377 | ENC1        | 0.37  |
| hsa-mir-377 | ENPP5       | 0.01  |
| hsa-mir-377 | F12         | 0.31  |
| hsa-mir-377 | FABP6       | 0.3   |
| hsa-mir-377 | FAM77C      | 0.24  |
| hsa-mir-377 | FLJ34047    | 0.46  |
| hsa-mir-377 | FRAS1       | 0.34  |
| hsa-mir-377 | GBP4        | -0.23 |
| hsa-mir-377 | GDA         | 0.4   |
| hsa-mir-377 | GDPD5       | 0.38  |
| hsa-mir-377 | GLIS1       | 0.39  |
| hsa-mir-377 | GPR65       | -0.34 |
| hsa-mir-377 | GREM2       | 0.41  |
| hsa-mir-377 | GSC         | 0.02  |
| hsa-mir-377 | HOOK1       | 0.48  |
| hsa-mir-377 | HOXA4       | -0.06 |
| hsa-mir-377 | HOXB8       | 0.13  |
| hsa-mir-377 | HOXB9       | 0.26  |
| hsa-mir-377 | HRNBP3      | 0.41  |
| hsa-mir-377 | ICAM5       | 0.42  |
| hsa-mir-377 | IFIH1       | -0.23 |
| hsa-mir-377 | INA         | 0.34  |
| hsa-mir-377 | KAZALD1     | -0.07 |
| hsa-mir-377 | KCNG3       | 0.47  |
| hsa-mir-377 | KCNK1       | 0.29  |
| hsa-mir-377 | KIAA0774    | 0.43  |
| hsa-mir-377 | KIAA1086    | 0.51  |
| hsa-mir-377 | KIAA1377    | 0.01  |
| hsa-mir-377 | KIAA1543    | 0.43  |
| hsa-mir-377 | KIAA2022    | 0.14  |
| hsa-mir-377 | KLF8        | 0.02  |
| hsa-mir-377 | KLK7        | 0.37  |
| hsa-mir-377 | L1CAM       | 0.42  |
| hsa-mir-377 | LIN28B      | 0.33  |
| hsa-mir-377 | LINGO2      | 0.33  |
| hsa-mir-377 | 22NC03-75B3 | 0.5   |
| hsa-mir-377 | LOC91461    | 0.4   |

|             |          |       |
|-------------|----------|-------|
| hsa-mir-377 | MAPRE3   | 0.08  |
| hsa-mir-377 | MDFI     | 0.17  |
| hsa-mir-377 | MEG3     | 0.58  |
| hsa-mir-377 | MGC5566  | 0.42  |
| hsa-mir-377 | MKX      | 0.18  |
| hsa-mir-377 | MYO9A    | 0.15  |
| hsa-mir-377 | NEFM     | 0.36  |
| hsa-mir-377 | NGEF     | 0.4   |
| hsa-mir-377 | OCA2     | 0.42  |
| hsa-mir-377 | ODZ2     | 0.34  |
| hsa-mir-377 | OGDHL    | 0.11  |
| hsa-mir-377 | P2RX5    | 0.4   |
| hsa-mir-377 | PCLO     | 0.38  |
| hsa-mir-377 | PDE2A    | 0.42  |
| hsa-mir-377 | PEG3     | 0.35  |
| hsa-mir-377 | PIR      | -0.08 |
| hsa-mir-377 | PITX2    | 0.06  |
| hsa-mir-377 | PLAC2    | 0.43  |
| hsa-mir-377 | PNLIPRP2 | 0.4   |
| hsa-mir-377 | POTE15   | 0.33  |
| hsa-mir-377 | PPM2C    | 0.08  |
| hsa-mir-377 | PRKCB1   | 0.32  |
| hsa-mir-377 | PRMT3    | -0.34 |
| hsa-mir-377 | PRSS1    | 0.49  |
| hsa-mir-377 | PRSS2    | 0.47  |
| hsa-mir-377 | PRSS3    | 0.45  |
| hsa-mir-377 | RAB15    | 0.39  |
| hsa-mir-377 | RTN4RL1  | 0.39  |
| hsa-mir-377 | RUNDC3B  | 0.05  |
| hsa-mir-377 | S100A2   | -0.45 |
| hsa-mir-377 | SH3GL3   | 0.33  |
| hsa-mir-377 | SHANK2   | 0.42  |
| hsa-mir-377 | SHC3     | 0.27  |
| hsa-mir-377 | SLC6A15  | 0.39  |
| hsa-mir-377 | SLC6A4   | 0.42  |
| hsa-mir-377 | SLITRK5  | 0.21  |
| hsa-mir-377 | SPINK5   | 0.41  |
| hsa-mir-377 | SSTR1    | 0.4   |
| hsa-mir-377 | STK32C   | 0.47  |
| hsa-mir-377 | SYNGR3   | 0.47  |
| hsa-mir-377 | SYT13    | 0.34  |
| hsa-mir-377 | TACSTD1  | 0.4   |
| hsa-mir-377 | TCERG1L  | 0.42  |
| hsa-mir-377 | TLR6     | -0.26 |
| hsa-mir-377 | TMEM181  | 0.17  |
| hsa-mir-377 | TNIP2    | 0.1   |
| hsa-mir-377 | TPO      | 0.47  |
| hsa-mir-377 | TRIM49   | 0.29  |
| hsa-mir-377 | WBSCR17  | 0.35  |
| hsa-mir-377 | ZMAT4    | 0.4   |
| hsa-mir-379 | March11  | 0.54  |
| hsa-mir-379 | ADRA2C   | 0.46  |
| hsa-mir-379 | ASPHD1   | 0.36  |

|             |             |       |
|-------------|-------------|-------|
| hsa-mir-379 | ATP8A2      | 0.51  |
| hsa-mir-379 | B3GNT4      | 0.52  |
| hsa-mir-379 | BAX         | 0.03  |
| hsa-mir-379 | BEGAIN      | 0.47  |
| hsa-mir-379 | C21orf57    | 0.05  |
| hsa-mir-379 | CBFA2T3     | 0.37  |
| hsa-mir-379 | CCK         | 0.31  |
| hsa-mir-379 | CCKBR       | 0.57  |
| hsa-mir-379 | CDH12       | 0.55  |
| hsa-mir-379 | CDH18       | 0.46  |
| hsa-mir-379 | CDH9        | 0.55  |
| hsa-mir-379 | CDKN2D      | 0.46  |
| hsa-mir-379 | CHN1        | 0.18  |
| hsa-mir-379 | CLEC2L      | 0.52  |
| hsa-mir-379 | CLEC4G      | 0.43  |
| hsa-mir-379 | CLECL1      | -0.46 |
| hsa-mir-379 | CLSTN3      | 0.51  |
| hsa-mir-379 | CNTNAP2     | 0.49  |
| hsa-mir-379 | CPLX2       | 0.5   |
| hsa-mir-379 | CPNE7       | 0.47  |
| hsa-mir-379 | CREG2       | 0.41  |
| hsa-mir-379 | CYP26B1     | 0.46  |
| hsa-mir-379 | DRD5        | 0.46  |
| hsa-mir-379 | EPHB6       | 0.53  |
| hsa-mir-379 | FGF13       | 0.44  |
| hsa-mir-379 | FLJ34047    | 0.55  |
| hsa-mir-379 | FRAS1       | 0.4   |
| hsa-mir-379 | GDA         | 0.5   |
| hsa-mir-379 | GPR65       | -0.36 |
| hsa-mir-379 | GPRASP1     | 0.26  |
| hsa-mir-379 | GREM2       | 0.55  |
| hsa-mir-379 | HOOK1       | 0.53  |
| hsa-mir-379 | HRNBP3      | 0.53  |
| hsa-mir-379 | HSPB3       | 0.38  |
| hsa-mir-379 | HTR2C       | 0.51  |
| hsa-mir-379 | INA         | 0.44  |
| hsa-mir-379 | IRAK4       | -0.4  |
| hsa-mir-379 | ITPR1       | 0.25  |
| hsa-mir-379 | JPH3        | 0.42  |
| hsa-mir-379 | KCNA1       | 0.42  |
| hsa-mir-379 | KCNG3       | 0.5   |
| hsa-mir-379 | KCNN1       | 0.51  |
| hsa-mir-379 | KIAA1086    | 0.6   |
| hsa-mir-379 | KIAA1622    | 0.48  |
| hsa-mir-379 | KIAA2022    | 0.23  |
| hsa-mir-379 | KLK7        | 0.52  |
| hsa-mir-379 | LINGO1      | 0.41  |
| hsa-mir-379 | LINGO2      | 0.44  |
| hsa-mir-379 | 22NC03-75B3 | 0.58  |
| hsa-mir-379 | LRP1B       | -0.02 |
| hsa-mir-379 | MAL2        | 0.46  |
| hsa-mir-379 | MATK        | 0.56  |
| hsa-mir-379 | MDFI        | 0.1   |

|             |          |       |
|-------------|----------|-------|
| hsa-mir-379 | MEG3     | 0.56  |
| hsa-mir-379 | MGC5566  | 0.48  |
| hsa-mir-379 | NEDD1    | -0.42 |
| hsa-mir-379 | NEFL     | 0.41  |
| hsa-mir-379 | NEFM     | 0.46  |
| hsa-mir-379 | NGEF     | 0.48  |
| hsa-mir-379 | NPM2     | 0.52  |
| hsa-mir-379 | NPTX1    | 0.4   |
| hsa-mir-379 | OCA2     | 0.51  |
| hsa-mir-379 | ODZ2     | 0.39  |
| hsa-mir-379 | P2RX5    | 0.47  |
| hsa-mir-379 | PCLO     | 0.49  |
| hsa-mir-379 | PDE2A    | 0.53  |
| hsa-mir-379 | PLAC2    | 0.51  |
| hsa-mir-379 | PRKCB1   | 0.43  |
| hsa-mir-379 | PRSS1    | 0.53  |
| hsa-mir-379 | PRSS2    | 0.5   |
| hsa-mir-379 | PRSS3    | 0.53  |
| hsa-mir-379 | RAB15    | 0.46  |
| hsa-mir-379 | RIC3     | 0.03  |
| hsa-mir-379 | RIMBP2   | 0.47  |
| hsa-mir-379 | RTN4RL1  | 0.52  |
| hsa-mir-379 | RYR2     | 0.54  |
| hsa-mir-379 | SH3GL2   | 0.32  |
| hsa-mir-379 | SH3GL3   | 0.44  |
| hsa-mir-379 | SHANK2   | 0.51  |
| hsa-mir-379 | SLC17A7  | 0.5   |
| hsa-mir-379 | SLC35F3  | 0.5   |
| hsa-mir-379 | SLC4A10  | 0.26  |
| hsa-mir-379 | SLC6A15  | 0.46  |
| hsa-mir-379 | SMPX     | 0.47  |
| hsa-mir-379 | SSTR1    | 0.51  |
| hsa-mir-379 | STK32C   | 0.54  |
| hsa-mir-379 | SULT4A1  | 0.56  |
| hsa-mir-379 | SYNGR3   | 0.57  |
| hsa-mir-379 | SYT1     | 0.38  |
| hsa-mir-379 | SYT13    | 0.44  |
| hsa-mir-379 | TCERG1L  | 0.52  |
| hsa-mir-379 | TNNT1    | 0.42  |
| hsa-mir-379 | TPO      | 0.51  |
| hsa-mir-379 | TUBB2A   | 0.42  |
| hsa-mir-379 | VSNL1    | 0.42  |
| hsa-mir-379 | WBSCR17  | 0.46  |
| hsa-mir-379 | WFDC1    | 0.43  |
| hsa-mir-379 | WNT10B   | 0.52  |
| hsa-mir-379 | WSCD2    | 0.48  |
| hsa-mir-379 | ZMAT4    | 0.46  |
| hsa-mir-381 | March11  | 0.62  |
| hsa-mir-381 | ATP8A2   | 0.56  |
| hsa-mir-381 | B3GNT4   | 0.5   |
| hsa-mir-381 | C21orf62 | -0.47 |
| hsa-mir-381 | CAPN6    | 0.33  |
| hsa-mir-381 | CDH12    | 0.52  |

|                |             |       |
|----------------|-------------|-------|
| hsa-mir-381    | CDH9        | 0.53  |
| hsa-mir-381    | CNTNAP2     | 0.49  |
| hsa-mir-381    | CPNE7       | 0.47  |
| hsa-mir-381    | CYP26B1     | 0.54  |
| hsa-mir-381    | DGAT2       | 0.41  |
| hsa-mir-381    | DRD5        | 0.52  |
| hsa-mir-381    | EPHA10      | 0.5   |
| hsa-mir-381    | FABP6       | 0.41  |
| hsa-mir-381    | FLJ34047    | 0.54  |
| hsa-mir-381    | FSTL5       | 0.46  |
| hsa-mir-381    | GYG2        | -0.27 |
| hsa-mir-381    | HMGCLL1     | 0.49  |
| hsa-mir-381    | HOOK1       | 0.56  |
| hsa-mir-381    | HTR1E       | 0.52  |
| hsa-mir-381    | INA         | 0.45  |
| hsa-mir-381    | IQGAP2      | -0.37 |
| hsa-mir-381    | JPH3        | 0.42  |
| hsa-mir-381    | KCNG3       | 0.52  |
| hsa-mir-381    | KIAA0774    | 0.56  |
| hsa-mir-381    | KIAA1086    | 0.58  |
| hsa-mir-381    | KLK7        | 0.51  |
| hsa-mir-381    | LINGO2      | 0.46  |
| hsa-mir-381    | 22NC03-75B3 | 0.6   |
| hsa-mir-381    | MATK        | 0.58  |
| hsa-mir-381    | MEG3        | 0.54  |
| hsa-mir-381    | NY-REN-7    | 0.53  |
| hsa-mir-381    | PCLO        | 0.53  |
| hsa-mir-381    | PRKCB1      | 0.44  |
| hsa-mir-381    | PRSS1       | 0.51  |
| hsa-mir-381    | PRSS2       | 0.52  |
| hsa-mir-381    | PRSS3       | 0.53  |
| hsa-mir-381    | RAB3B       | 0.35  |
| hsa-mir-381    | RYR2        | 0.55  |
| hsa-mir-381    | SH3GL3      | 0.5   |
| hsa-mir-381    | SMPX        | 0.47  |
| hsa-mir-381    | SSTR1       | 0.56  |
| hsa-mir-381    | SYT13       | 0.47  |
| hsa-mir-381    | TCERG1L     | 0.57  |
| hsa-mir-381    | TNNT2       | 0.51  |
| hsa-mir-381    | TPO         | 0.55  |
| hsa-mir-381    | UNC5D       | 0.27  |
| hsa-mir-382    | DLK1        | 0.19  |
| hsa-mir-382    | GPC3        | 0.2   |
| hsa-mir-382    | IGF2        | 0.22  |
| hsa-mir-382    | MEG3        | 0.41  |
| hsa-mir-382    | ONECUT1     | 0.06  |
| hsa-mir-383    | AP3M2       | 0.39  |
| hsa-mir-383    | CABP1       | 0.5   |
| hsa-mir-383    | SNCG        | 0.58  |
| hsa-mir-383    | TMCC2       | 0.45  |
| hsa-mir-409-3p | ALB         | 0.34  |
| hsa-mir-409-3p | ALDH3A1     | 0.15  |
| hsa-mir-409-3p | AMHR2       | 0.34  |



|                |          |       |
|----------------|----------|-------|
| hsa-mir-409-3p | APOH     | 0.3   |
| hsa-mir-409-3p | AQP3     | 0.42  |
| hsa-mir-409-3p | ART4     | 0.35  |
| hsa-mir-409-3p | BDKRB1   | 0.42  |
| hsa-mir-409-3p | C10orf82 | 0.37  |
| hsa-mir-409-3p | C12orf56 | 0.32  |
| hsa-mir-409-3p | C16orf73 | 0.36  |
| hsa-mir-409-3p | C18orf2  | 0.41  |
| hsa-mir-409-3p | C21orf90 | 0.35  |
| hsa-mir-409-3p | C4BPA    | 0.18  |
| hsa-mir-409-3p | C8B      | 0.31  |
| hsa-mir-409-3p | CALML3   | 0.38  |
| hsa-mir-409-3p | CAPN6    | 0.33  |
| hsa-mir-409-3p | CDH16    | 0.37  |
| hsa-mir-409-3p | CEACAM5  | 0.29  |
| hsa-mir-409-3p | CEACAM6  | 0.29  |
| hsa-mir-409-3p | CLCA2    | 0.42  |
| hsa-mir-409-3p | CLDN6    | 0.32  |
| hsa-mir-409-3p | CPB2     | 0.34  |
| hsa-mir-409-3p | CREB3L3  | 0.39  |
| hsa-mir-409-3p | DOHH     | 0.38  |
| hsa-mir-409-3p | DSCR8    | 0.32  |
| hsa-mir-409-3p | ELA2A    | 0.27  |
| hsa-mir-409-3p | EML2     | 0.36  |
| hsa-mir-409-3p | ESX1     | 0.35  |
| hsa-mir-409-3p | FAM83B   | 0.35  |
| hsa-mir-409-3p | FAM9B    | 0.34  |
| hsa-mir-409-3p | FBXL21   | 0.41  |
| hsa-mir-409-3p | FGA      | 0.31  |
| hsa-mir-409-3p | FGB      | 0.3   |
| hsa-mir-409-3p | FGF19    | 0.25  |
| hsa-mir-409-3p | FHL5     | -0.34 |
| hsa-mir-409-3p | FLJ21075 | 0.35  |
| hsa-mir-409-3p | FLJ25801 | 0.32  |
| hsa-mir-409-3p | FLJ46111 | 0.25  |
| hsa-mir-409-3p | FTCD     | 0.38  |
| hsa-mir-409-3p | GATA2    | 0.29  |
| hsa-mir-409-3p | GCNT3    | 0.35  |
| hsa-mir-409-3p | GYPB     | 0.37  |
| hsa-mir-409-3p | HAND1    | 0.39  |
| hsa-mir-409-3p | HBG2     | 0.34  |
| hsa-mir-409-3p | IGF2BP1  | 0.28  |
| hsa-mir-409-3p | IGLV2-14 | 0.38  |
| hsa-mir-409-3p | IL11     | 0.34  |
| hsa-mir-409-3p | INSL4    | 0.29  |
| hsa-mir-409-3p | KBTBD3   | -0.25 |
| hsa-mir-409-3p | KLF1     | 0.32  |
| hsa-mir-409-3p | KRT12    | 0.31  |
| hsa-mir-409-3p | KRT16    | 0.36  |
| hsa-mir-409-3p | KRT33A   | 0.33  |
| hsa-mir-409-3p | KRT37    | 0.33  |
| hsa-mir-409-3p | KRT6A    | 0.33  |
| hsa-mir-409-3p | KRT6B    | 0.28  |

|                |           |       |
|----------------|-----------|-------|
| hsa-mir-409-3p | LCA5      | -0.14 |
| hsa-mir-409-3p | LIN28     | 0.3   |
| hsa-mir-409-3p | LIN28B    | 0.37  |
| hsa-mir-409-3p | LOC129293 | 0.41  |
| hsa-mir-409-3p | LOC441601 | 0.37  |
| hsa-mir-409-3p | LOC91461  | 0.36  |
| hsa-mir-409-3p | MAGEA4    | 0.27  |
| hsa-mir-409-3p | MAGEA8    | 0.38  |
| hsa-mir-409-3p | MAGEA9    | 0.29  |
| hsa-mir-409-3p | MAGEC1    | 0.31  |
| hsa-mir-409-3p | MAGEC2    | 0.23  |
| hsa-mir-409-3p | MGC102966 | 0.29  |
| hsa-mir-409-3p | MMRN1     | -0.36 |
| hsa-mir-409-3p | MS4A3     | 0.34  |
| hsa-mir-409-3p | MSMB      | 0.37  |
| hsa-mir-409-3p | MUC16     | 0.29  |
| hsa-mir-409-3p | MYL1      | 0.32  |
| hsa-mir-409-3p | MYL7      | 0.4   |
| hsa-mir-409-3p | MYLC2PL   | 0.4   |
| hsa-mir-409-3p | MYPN      | 0.32  |
| hsa-mir-409-3p | NRG4      | 0.44  |
| hsa-mir-409-3p | ODAM      | 0.34  |
| hsa-mir-409-3p | OR1D2     | 0.44  |
| hsa-mir-409-3p | OR51E1    | -0.27 |
| hsa-mir-409-3p | PAEP      | 0.27  |
| hsa-mir-409-3p | PAGE1     | 0.33  |
| hsa-mir-409-3p | PAX9      | 0.33  |
| hsa-mir-409-3p | PDILT     | 0.37  |
| hsa-mir-409-3p | PIAS4     | 0.38  |
| hsa-mir-409-3p | PKP2      | 0.27  |
| hsa-mir-409-3p | PNLIPRP2  | 0.4   |
| hsa-mir-409-3p | POTE15    | 0.33  |
| hsa-mir-409-3p | PRDM9     | 0.33  |
| hsa-mir-409-3p | PRSS1     | 0.49  |
| hsa-mir-409-3p | PRSS2     | 0.46  |
| hsa-mir-409-3p | PRSS3     | 0.41  |
| hsa-mir-409-3p | PRSS7     | 0.25  |
| hsa-mir-409-3p | PSG6      | 0.33  |
| hsa-mir-409-3p | PTGFR     | 0.38  |
| hsa-mir-409-3p | RAD9B     | -0.33 |
| hsa-mir-409-3p | RFTN2     | -0.33 |
| hsa-mir-409-3p | RNF212    | 0.35  |
| hsa-mir-409-3p | ROS1      | 0.3   |
| hsa-mir-409-3p | RSBN1     | -0.25 |
| hsa-mir-409-3p | SERPINA10 | 0.28  |
| hsa-mir-409-3p | SERPINA11 | 0.34  |
| hsa-mir-409-3p | SERPINA4  | 0.36  |
| hsa-mir-409-3p | SERPINB3  | 0.35  |
| hsa-mir-409-3p | SERPINB5  | 0.33  |
| hsa-mir-409-3p | SLC17A2   | 0.41  |
| hsa-mir-409-3p | SLC45A2   | 0.38  |
| hsa-mir-409-3p | SLC6A4    | 0.39  |
| hsa-mir-409-3p | SMCR5     | 0.3   |

|                |         |       |
|----------------|---------|-------|
| hsa-mir-409-3p | SPATA22 | -0.25 |
| hsa-mir-409-3p | SPINK5  | 0.38  |
| hsa-mir-409-3p | SPRR1B  | 0.43  |
| hsa-mir-409-3p | SULT2A1 | 0.34  |
| hsa-mir-409-3p | SYTL1   | 0.24  |
| hsa-mir-409-3p | TMEM16J | 0.31  |
| hsa-mir-409-3p | TMEM171 | 0.33  |
| hsa-mir-409-3p | TMEM83  | 0.3   |
| hsa-mir-409-3p | TP53TG3 | 0.32  |
| hsa-mir-409-3p | TPO     | 0.42  |
| hsa-mir-409-3p | TRIM15  | 0.33  |
| hsa-mir-409-3p | TRIM49  | 0.34  |
| hsa-mir-409-3p | TRPM1   | 0.38  |
| hsa-mir-409-3p | TSPY2   | 0.35  |
| hsa-mir-409-3p | UGT2B28 | 0.36  |
| hsa-mir-409-3p | UGT2B4  | 0.37  |
| hsa-mir-409-3p | YIPF7   | -0.39 |
| hsa-mir-409-3p | ZNF501  | -0.31 |
| hsa-mir-409-3p | ZNF787  | 0.25  |
| hsa-mir-410    | March11 | 0.65  |
| hsa-mir-410    | AASS    | -0.38 |
| hsa-mir-410    | ACTN2   | 0.14  |
| hsa-mir-410    | ADAM11  | 0.6   |
| hsa-mir-410    | ADRA2C  | 0.58  |
| hsa-mir-410    | AJAP1   | 0.5   |
| hsa-mir-410    | ATP8A2  | 0.58  |
| hsa-mir-410    | BEGAIN  | 0.52  |
| hsa-mir-410    | BRUNOL4 | 0.53  |
| hsa-mir-410    | BSN     | 0.47  |
| hsa-mir-410    | CA11    | 0.5   |
| hsa-mir-410    | CABP1   | 0.58  |
| hsa-mir-410    | CACNG3  | 0.5   |
| hsa-mir-410    | CAMK2A  | 0.42  |
| hsa-mir-410    | CAP2    | 0.38  |
| hsa-mir-410    | CCK     | 0.43  |
| hsa-mir-410    | CCKBR   | 0.67  |
| hsa-mir-410    | CDH12   | 0.62  |
| hsa-mir-410    | CDH18   | 0.54  |
| hsa-mir-410    | CDH9    | 0.63  |
| hsa-mir-410    | CDKL2   | 0.27  |
| hsa-mir-410    | CHD5    | 0.52  |
| hsa-mir-410    | CHRM2   | 0.48  |
| hsa-mir-410    | CLEC2L  | 0.62  |
| hsa-mir-410    | CLSTN3  | 0.56  |
| hsa-mir-410    | CNKSR2  | 0.57  |
| hsa-mir-410    | CNTNAP2 | 0.57  |
| hsa-mir-410    | CPLX2   | 0.61  |
| hsa-mir-410    | CPNE7   | 0.52  |
| hsa-mir-410    | CREG2   | 0.51  |
| hsa-mir-410    | CRYM    | 0.49  |
| hsa-mir-410    | CYP4X1  | 0.58  |
| hsa-mir-410    | DNM1    | 0.52  |
| hsa-mir-410    | DRD5    | 0.5   |

|             |             |      |
|-------------|-------------|------|
| hsa-mir-410 | EGFL7       | 0.51 |
| hsa-mir-410 | ENC1        | 0.51 |
| hsa-mir-410 | ENTPD3      | 0.29 |
| hsa-mir-410 | EPHB6       | 0.63 |
| hsa-mir-410 | FAM126B     | 0.29 |
| hsa-mir-410 | FETUB       | 0.08 |
| hsa-mir-410 | FGF13       | 0.51 |
| hsa-mir-410 | FLJ34047    | 0.58 |
| hsa-mir-410 | FRAS1       | 0.42 |
| hsa-mir-410 | FSTL5       | 0.52 |
| hsa-mir-410 | GABRA1      | 0.45 |
| hsa-mir-410 | GABRA2      | 0.39 |
| hsa-mir-410 | GABRB1      | 0.23 |
| hsa-mir-410 | GABRG2      | 0.52 |
| hsa-mir-410 | GABRG3      | 0.51 |
| hsa-mir-410 | GDA         | 0.58 |
| hsa-mir-410 | GDPD5       | 0.45 |
| hsa-mir-410 | GLS2        | 0.58 |
| hsa-mir-410 | GLT1D1      | 0.6  |
| hsa-mir-410 | GPRASP1     | 0.3  |
| hsa-mir-410 | GREM2       | 0.64 |
| hsa-mir-410 | GRIN2A      | 0.57 |
| hsa-mir-410 | HCN1        | 0.57 |
| hsa-mir-410 | HECW1       | 0.5  |
| hsa-mir-410 | HMGCLL1     | 0.49 |
| hsa-mir-410 | HOOK1       | 0.59 |
| hsa-mir-410 | HRNBP3      | 0.63 |
| hsa-mir-410 | HS3ST4      | 0.5  |
| hsa-mir-410 | HSPB3       | 0.48 |
| hsa-mir-410 | HTR1E       | 0.61 |
| hsa-mir-410 | HTR2C       | 0.6  |
| hsa-mir-410 | HTR5A       | 0.6  |
| hsa-mir-410 | ICAM5       | 0.64 |
| hsa-mir-410 | INA         | 0.51 |
| hsa-mir-410 | KCNA1       | 0.44 |
| hsa-mir-410 | KCNG3       | 0.52 |
| hsa-mir-410 | KCNK1       | 0.52 |
| hsa-mir-410 | KIAA0748    | 0.56 |
| hsa-mir-410 | KIAA0774    | 0.63 |
| hsa-mir-410 | KIAA1086    | 0.67 |
| hsa-mir-410 | KIAA1467    | 0.09 |
| hsa-mir-410 | KIAA1543    | 0.51 |
| hsa-mir-410 | KIAA1622    | 0.56 |
| hsa-mir-410 | KIF17       | 0.23 |
| hsa-mir-410 | KLHL1       | 0.57 |
| hsa-mir-410 | KLK10       | 0.49 |
| hsa-mir-410 | KLK7        | 0.6  |
| hsa-mir-410 | KRT222P     | 0.58 |
| hsa-mir-410 | LINGO2      | 0.52 |
| hsa-mir-410 | 22NC03-75B3 | 0.66 |
| hsa-mir-410 | LOC133874   | 0.15 |
| hsa-mir-410 | LOC399947   | 0.35 |
| hsa-mir-410 | MAGEA8      | 0.32 |

|             |          |       |
|-------------|----------|-------|
| hsa-mir-410 | MAL2     | 0.54  |
| hsa-mir-410 | MAST3    | 0.59  |
| hsa-mir-410 | MATK     | 0.66  |
| hsa-mir-410 | MDFI     | 0.13  |
| hsa-mir-410 | MGC5566  | 0.51  |
| hsa-mir-410 | MICAL2   | 0.54  |
| hsa-mir-410 | NEDD1    | -0.45 |
| hsa-mir-410 | NEFM     | 0.55  |
| hsa-mir-410 | NEURL    | 0.65  |
| hsa-mir-410 | NGEF     | 0.53  |
| hsa-mir-410 | NPM2     | 0.62  |
| hsa-mir-410 | NRGN     | 0.51  |
| hsa-mir-410 | NSF      | 0.47  |
| hsa-mir-410 | NY-REN-7 | 0.6   |
| hsa-mir-410 | OCA2     | 0.59  |
| hsa-mir-410 | OGDHL    | 0.25  |
| hsa-mir-410 | OLFM3    | 0.49  |
| hsa-mir-410 | P2RX5    | 0.5   |
| hsa-mir-410 | PACSN1   | 0.58  |
| hsa-mir-410 | PCLO     | 0.56  |
| hsa-mir-410 | PDE2A    | 0.63  |
| hsa-mir-410 | PIP3-E   | 0.49  |
| hsa-mir-410 | PLAC2    | 0.56  |
| hsa-mir-410 | PLEKHG5  | 0.32  |
| hsa-mir-410 | PNMA3    | 0.57  |
| hsa-mir-410 | PNMA5    | 0.55  |
| hsa-mir-410 | PPP2R2C  | 0.54  |
| hsa-mir-410 | PRG2     | 0.52  |
| hsa-mir-410 | PRKCB1   | 0.51  |
| hsa-mir-410 | PRSS1    | 0.56  |
| hsa-mir-410 | PRSS2    | 0.55  |
| hsa-mir-410 | PRSS3    | 0.61  |
| hsa-mir-410 | PSD3     | 0.41  |
| hsa-mir-410 | PTPRR    | 0.48  |
| hsa-mir-410 | RAB15    | 0.53  |
| hsa-mir-410 | RBM11    | 0.52  |
| hsa-mir-410 | RBP4     | 0.56  |
| hsa-mir-410 | RELN     | 0.53  |
| hsa-mir-410 | RPRML    | 0.41  |
| hsa-mir-410 | RTN4RL1  | 0.61  |
| hsa-mir-410 | RYR2     | 0.64  |
| hsa-mir-410 | SH2D5    | 0.45  |
| hsa-mir-410 | SH3GL3   | 0.55  |
| hsa-mir-410 | SHANK2   | 0.61  |
| hsa-mir-410 | SLC12A5  | 0.52  |
| hsa-mir-410 | SLC17A7  | 0.6   |
| hsa-mir-410 | SLC1A6   | 0.5   |
| hsa-mir-410 | SLC35F3  | 0.59  |
| hsa-mir-410 | SLC4A10  | 0.34  |
| hsa-mir-410 | SLC6A15  | 0.5   |
| hsa-mir-410 | SLITRK4  | 0.52  |
| hsa-mir-410 | SMPX     | 0.58  |
| hsa-mir-410 | SSTR1    | 0.6   |

|              |             |       |
|--------------|-------------|-------|
| hsa-mir-410  | STK19       | 0.19  |
| hsa-mir-410  | STK32C      | 0.6   |
| hsa-mir-410  | STYK1       | 0.58  |
| hsa-mir-410  | SULT4A1     | 0.65  |
| hsa-mir-410  | SYNGR3      | 0.63  |
| hsa-mir-410  | SYNPR       | 0.41  |
| hsa-mir-410  | SYT1        | 0.45  |
| hsa-mir-410  | SYT13       | 0.55  |
| hsa-mir-410  | SYT17       | 0.12  |
| hsa-mir-410  | SYT5        | 0.62  |
| hsa-mir-410  | TACSTD1     | 0.48  |
| hsa-mir-410  | TAF13       | -0.27 |
| hsa-mir-410  | TCERG1L     | 0.62  |
| hsa-mir-410  | TNIP2       | -0.01 |
| hsa-mir-410  | TNNT2       | 0.62  |
| hsa-mir-410  | TPO         | 0.59  |
| hsa-mir-410  | TUBB2A      | 0.49  |
| hsa-mir-410  | UNC13C      | 0.51  |
| hsa-mir-410  | VIP         | 0.43  |
| hsa-mir-410  | VSNL1       | 0.5   |
| hsa-mir-410  | WBSCR17     | 0.53  |
| hsa-mir-410  | WNT10B      | 0.62  |
| hsa-mir-410  | WSCD2       | 0.55  |
| hsa-mir-410  | XK          | 0.45  |
| hsa-mir-410  | ZMAT4       | 0.48  |
| hsa-mir-411  | C4orf6      | -0.31 |
| hsa-mir-411  | CDH9        | 0.49  |
| hsa-mir-411  | EPHB6       | 0.49  |
| hsa-mir-411  | FLJ34047    | 0.47  |
| hsa-mir-411  | FRAS1       | 0.36  |
| hsa-mir-411  | HOOK1       | 0.48  |
| hsa-mir-411  | HRNBP3      | 0.5   |
| hsa-mir-411  | KIAA1086    | 0.54  |
| hsa-mir-411  | KLK7        | 0.48  |
| hsa-mir-411  | 22NC03-75B3 | 0.52  |
| hsa-mir-411  | MEG3        | 0.56  |
| hsa-mir-411  | NGEF        | 0.48  |
| hsa-mir-411  | PCLO        | 0.48  |
| hsa-mir-411  | PLAC2       | 0.46  |
| hsa-mir-411  | PRSS1       | 0.44  |
| hsa-mir-411  | RTN4RL1     | 0.45  |
| hsa-mir-411  | SHANK2      | 0.48  |
| hsa-mir-411  | SSTR1       | 0.49  |
| hsa-mir-411  | TCERG1L     | 0.5   |
| hsa-mir-411  | TPO         | 0.49  |
| hsa-mir-411  | WBSCR17     | 0.44  |
| hsa-mir-422b | ABCC2       | 0.49  |
| hsa-mir-422b | ABCG5       | 0.42  |
| hsa-mir-422b | ACF         | 0.43  |
| hsa-mir-422b | ACSM1       | 0.4   |
| hsa-mir-422b | ACSM2B      | 0.41  |
| hsa-mir-422b | ACSM3       | 0.43  |
| hsa-mir-422b | ACTBL1      | 0.47  |

|              |           |       |
|--------------|-----------|-------|
| hsa-mir-422b | ACTL8     | 0.49  |
| hsa-mir-422b | ADCYAP1R1 | -0.47 |
| hsa-mir-422b | ADH4      | 0.34  |
| hsa-mir-422b | ADHFE1    | -0.5  |
| hsa-mir-422b | AFP       | 0.43  |
| hsa-mir-422b | AGR2      | 0.39  |
| hsa-mir-422b | AKR1C1    | 0.23  |
| hsa-mir-422b | AKR1CL2   | 0.52  |
| hsa-mir-422b | ALB       | 0.47  |
| hsa-mir-422b | ALX1      | 0.38  |
| hsa-mir-422b | AMHR2     | 0.52  |
| hsa-mir-422b | AMPD1     | 0.41  |
| hsa-mir-422b | ANKIB1    | -0.29 |
| hsa-mir-422b | ANKRD21   | 0.44  |
| hsa-mir-422b | ANPEP     | 0.47  |
| hsa-mir-422b | ANXA9     | 0.38  |
| hsa-mir-422b | APOA2     | 0.39  |
| hsa-mir-422b | APOA5     | 0.46  |
| hsa-mir-422b | APOB      | 0.35  |
| hsa-mir-422b | APOC3     | 0.34  |
| hsa-mir-422b | APOF      | 0.4   |
| hsa-mir-422b | APOH      | 0.41  |
| hsa-mir-422b | AQP3      | 0.45  |
| hsa-mir-422b | AQP4      | -0.43 |
| hsa-mir-422b | ARL14     | 0.42  |
| hsa-mir-422b | ART4      | 0.51  |
| hsa-mir-422b | ASGR2     | 0.44  |
| hsa-mir-422b | ASTN1     | -0.45 |
| hsa-mir-422b | ATAD4     | 0.44  |
| hsa-mir-422b | AURKC     | 0.39  |
| hsa-mir-422b | BAIAP2L1  | 0.51  |
| hsa-mir-422b | BDKRB1    | 0.46  |
| hsa-mir-422b | BLK       | 0.29  |
| hsa-mir-422b | BMP5      | 0.31  |
| hsa-mir-422b | C10orf122 | 0.51  |
| hsa-mir-422b | C10orf63  | -0.41 |
| hsa-mir-422b | C10orf82  | 0.39  |
| hsa-mir-422b | C12orf54  | -0.53 |
| hsa-mir-422b | C12orf56  | 0.35  |
| hsa-mir-422b | C14orf115 | 0.48  |
| hsa-mir-422b | C14orf73  | 0.47  |
| hsa-mir-422b | C16orf73  | 0.43  |
| hsa-mir-422b | C18orf2   | 0.49  |
| hsa-mir-422b | C19orf21  | 0.41  |
| hsa-mir-422b | C19orf46  | 0.25  |
| hsa-mir-422b | C1orf172  | 0.32  |
| hsa-mir-422b | C1orf211  | 0.37  |
| hsa-mir-422b | C20orf26  | -0.38 |
| hsa-mir-422b | C21orf125 | 0.47  |
| hsa-mir-422b | C21orf90  | 0.37  |
| hsa-mir-422b | C4BPA     | 0.32  |
| hsa-mir-422b | C4BPB     | 0.48  |
| hsa-mir-422b | C6orf156  | 0.29  |

|              |          |       |
|--------------|----------|-------|
| hsa-mir-422b | C6orf199 | -0.49 |
| hsa-mir-422b | C8A      | 0.45  |
| hsa-mir-422b | C8B      | 0.48  |
| hsa-mir-422b | C9orf68  | -0.5  |
| hsa-mir-422b | C9orf98  | -0.5  |
| hsa-mir-422b | CALML3   | 0.34  |
| hsa-mir-422b | CALML5   | 0.5   |
| hsa-mir-422b | CAPN6    | 0.42  |
| hsa-mir-422b | CARD11   | 0.48  |
| hsa-mir-422b | CASQ1    | -0.47 |
| hsa-mir-422b | CD163    | -0.07 |
| hsa-mir-422b | CD1B     | 0.41  |
| hsa-mir-422b | CD1E     | 0.37  |
| hsa-mir-422b | CD8B     | 0.43  |
| hsa-mir-422b | CDH16    | 0.42  |
| hsa-mir-422b | CEACAM1  | 0.48  |
| hsa-mir-422b | CEACAM5  | 0.46  |
| hsa-mir-422b | CEACAM6  | 0.45  |
| hsa-mir-422b | CES1     | 0.43  |
| hsa-mir-422b | CGA      | 0.4   |
| hsa-mir-422b | CLCA2    | 0.47  |
| hsa-mir-422b | CLDN14   | 0.41  |
| hsa-mir-422b | CLDN6    | 0.48  |
| hsa-mir-422b | CLEC14A  | -0.2  |
| hsa-mir-422b | COL2A1   | 0.32  |
| hsa-mir-422b | CPB2     | 0.5   |
| hsa-mir-422b | CPN1     | 0.49  |
| hsa-mir-422b | CREB3L3  | 0.46  |
| hsa-mir-422b | CTCFL    | 0.47  |
| hsa-mir-422b | CXorf36  | -0.3  |
| hsa-mir-422b | CYP1A1   | 0.45  |
| hsa-mir-422b | CYP24A1  | 0.47  |
| hsa-mir-422b | CYP2F1   | 0.52  |
| hsa-mir-422b | DERL3    | 0.56  |
| hsa-mir-422b | DIO1     | 0.44  |
| hsa-mir-422b | DLK1     | 0.25  |
| hsa-mir-422b | DMBX1    | 0.31  |
| hsa-mir-422b | DNAH7    | -0.53 |
| hsa-mir-422b | DNAH8    | 0.3   |
| hsa-mir-422b | DNMT3L   | 0.46  |
| hsa-mir-422b | DPPA2    | 0.33  |
| hsa-mir-422b | DPYSL5   | -0.51 |
| hsa-mir-422b | DQX1     | 0.34  |
| hsa-mir-422b | DSCR6    | 0.26  |
| hsa-mir-422b | DSCR8    | 0.5   |
| hsa-mir-422b | DSG2     | 0.42  |
| hsa-mir-422b | DST      | -0.34 |
| hsa-mir-422b | DUSP13   | 0.26  |
| hsa-mir-422b | ELA3A    | 0.38  |
| hsa-mir-422b | ELTD1    | -0.23 |
| hsa-mir-422b | EPGN     | 0.47  |
| hsa-mir-422b | EPS8L1   | 0.42  |
| hsa-mir-422b | ESX1     | 0.46  |



|              |          |       |
|--------------|----------|-------|
| hsa-mir-422b | F10      | 0.34  |
| hsa-mir-422b | F2       | 0.41  |
| hsa-mir-422b | F3       | -0.32 |
| hsa-mir-422b | FAM130A2 | -0.5  |
| hsa-mir-422b | FAM135B  | -0.48 |
| hsa-mir-422b | FAM5B    | -0.48 |
| hsa-mir-422b | FAM83A   | 0.52  |
| hsa-mir-422b | FAM83B   | 0.48  |
| hsa-mir-422b | FAM9B    | 0.5   |
| hsa-mir-422b | FBXL21   | 0.5   |
| hsa-mir-422b | FGA      | 0.48  |
| hsa-mir-422b | FGB      | 0.46  |
| hsa-mir-422b | FGF19    | 0.41  |
| hsa-mir-422b | FGF23    | 0.42  |
| hsa-mir-422b | FGG      | 0.43  |
| hsa-mir-422b | FGL1     | 0.42  |
| hsa-mir-422b | FGL2     | -0.22 |
| hsa-mir-422b | FHL5     | -0.37 |
| hsa-mir-422b | FLJ21075 | 0.51  |
| hsa-mir-422b | FLJ25801 | 0.35  |
| hsa-mir-422b | FLJ34047 | 0.24  |
| hsa-mir-422b | FLJ35880 | 0.42  |
| hsa-mir-422b | FLJ36208 | 0.42  |
| hsa-mir-422b | FLJ40298 | -0.48 |
| hsa-mir-422b | FLJ40504 | 0.34  |
| hsa-mir-422b | FLJ46111 | 0.45  |
| hsa-mir-422b | FOXA1    | 0.27  |
| hsa-mir-422b | FOXA3    | 0.29  |
| hsa-mir-422b | FRRS1    | 0.42  |
| hsa-mir-422b | FTCD     | 0.43  |
| hsa-mir-422b | G6PC     | 0.44  |
| hsa-mir-422b | GATA2    | 0.48  |
| hsa-mir-422b | GATA3    | 0.39  |
| hsa-mir-422b | GCNT3    | 0.48  |
| hsa-mir-422b | GDF3     | 0.31  |
| hsa-mir-422b | GDF9     | -0.5  |
| hsa-mir-422b | GF11B    | 0.44  |
| hsa-mir-422b | GJB7     | 0.43  |
| hsa-mir-422b | GNA15    | 0.37  |
| hsa-mir-422b | GPR123   | -0.44 |
| hsa-mir-422b | GPR174   | 0.44  |
| hsa-mir-422b | GPR34    | -0.3  |
| hsa-mir-422b | GPR4     | -0.23 |
| hsa-mir-422b | GPR75    | -0.52 |
| hsa-mir-422b | GPR87    | 0.33  |
| hsa-mir-422b | GPX2     | 0.4   |
| hsa-mir-422b | GRAP2    | 0.43  |
| hsa-mir-422b | GRIA4    | -0.5  |
| hsa-mir-422b | GRIK4    | -0.46 |
| hsa-mir-422b | GSG1L    | -0.46 |
| hsa-mir-422b | GSTA2    | 0.3   |
| hsa-mir-422b | GSTA3    | 0.46  |
| hsa-mir-422b | GSTA5    | 0.41  |

|              |          |       |
|--------------|----------|-------|
| hsa-mir-422b | GYPA     | 0.32  |
| hsa-mir-422b | GYPB     | 0.52  |
| hsa-mir-422b | GYPE     | 0.49  |
| hsa-mir-422b | GYPC     | 0.41  |
| hsa-mir-422b | HAL      | 0.38  |
| hsa-mir-422b | HAND1    | 0.52  |
| hsa-mir-422b | HBG2     | 0.49  |
| hsa-mir-422b | HDAC10   | 0.34  |
| hsa-mir-422b | HEMGN    | 0.35  |
| hsa-mir-422b | HEPACAM  | -0.44 |
| hsa-mir-422b | HFE2     | 0.34  |
| hsa-mir-422b | HGD      | 0.26  |
| hsa-mir-422b | HNT      | -0.5  |
| hsa-mir-422b | HORMAD1  | 0.4   |
| hsa-mir-422b | HOXB5    | 0.28  |
| hsa-mir-422b | HOXB9    | 0.37  |
| hsa-mir-422b | HPN      | 0.31  |
| hsa-mir-422b | HSD17B2  | 0.38  |
| hsa-mir-422b | HSH2D    | 0.45  |
| hsa-mir-422b | ICA1L    | -0.54 |
| hsa-mir-422b | ICAM4    | 0.52  |
| hsa-mir-422b | IGF2BP1  | 0.45  |
| hsa-mir-422b | IGLV2-14 | 0.53  |
| hsa-mir-422b | IGSF6    | -0.25 |
| hsa-mir-422b | IL11     | 0.42  |
| hsa-mir-422b | IL22RA1  | 0.46  |
| hsa-mir-422b | IL23R    | 0.51  |
| hsa-mir-422b | IL25     | -0.45 |
| hsa-mir-422b | INSL4    | 0.41  |
| hsa-mir-422b | ISX      | 0.44  |
| hsa-mir-422b | ITIH3    | 0.43  |
| hsa-mir-422b | JMJD2D   | -0.45 |
| hsa-mir-422b | KBTBD3   | -0.55 |
| hsa-mir-422b | KCNG3    | 0.37  |
| hsa-mir-422b | KDR      | -0.19 |
| hsa-mir-422b | KIAA0825 | 0.36  |
| hsa-mir-422b | KLF1     | 0.48  |
| hsa-mir-422b | KLHDC1   | -0.51 |
| hsa-mir-422b | KLK1     | 0.44  |
| hsa-mir-422b | KLK11    | 0.39  |
| hsa-mir-422b | KLK8     | 0.39  |
| hsa-mir-422b | KNG1     | 0.37  |
| hsa-mir-422b | KRT12    | 0.45  |
| hsa-mir-422b | KRT13    | 0.49  |
| hsa-mir-422b | KRT15    | 0.3   |
| hsa-mir-422b | KRT16    | 0.45  |
| hsa-mir-422b | KRT23    | 0.39  |
| hsa-mir-422b | KRT33A   | 0.51  |
| hsa-mir-422b | KRT34    | 0.37  |
| hsa-mir-422b | KRT37    | 0.47  |
| hsa-mir-422b | KRT6A    | 0.48  |
| hsa-mir-422b | KRT6B    | 0.38  |
| hsa-mir-422b | KRT6C    | 0.5   |

|              |           |       |
|--------------|-----------|-------|
| hsa-mir-422b | KRT80     | 0.42  |
| hsa-mir-422b | KRT86     | 0.54  |
| hsa-mir-422b | KRTAP1-5  | 0.45  |
| hsa-mir-422b | KRTAP3-1  | 0.41  |
| hsa-mir-422b | KRTDAP    | 0.39  |
| hsa-mir-422b | L1TD1     | 0.36  |
| hsa-mir-422b | LCA5      | -0.43 |
| hsa-mir-422b | LCK       | 0.41  |
| hsa-mir-422b | LCT       | 0.48  |
| hsa-mir-422b | LDHC      | 0.25  |
| hsa-mir-422b | LDLRAD1   | 0.54  |
| hsa-mir-422b | LIN28     | 0.45  |
| hsa-mir-422b | LOC129293 | 0.45  |
| hsa-mir-422b | LOC399900 | 0.37  |
| hsa-mir-422b | LOC441601 | 0.51  |
| hsa-mir-422b | LOC91461  | 0.45  |
| hsa-mir-422b | LRP1B     | -0.4  |
| hsa-mir-422b | LRRTM2    | -0.39 |
| hsa-mir-422b | LTB4R     | 0.45  |
| hsa-mir-422b | MAEL      | -0.39 |
| hsa-mir-422b | MAGEA1    | 0.4   |
| hsa-mir-422b | MAGEA10   | 0.43  |
| hsa-mir-422b | MAGEA4    | 0.43  |
| hsa-mir-422b | MAGEA5    | 0.48  |
| hsa-mir-422b | MAGEA8    | 0.48  |
| hsa-mir-422b | MAGEA9    | 0.42  |
| hsa-mir-422b | MAGEB6    | 0.48  |
| hsa-mir-422b | MAGEC1    | 0.39  |
| hsa-mir-422b | MAGEC2    | 0.29  |
| hsa-mir-422b | MAGEE2    | -0.36 |
| hsa-mir-422b | MAP2      | -0.51 |
| hsa-mir-422b | MAT1A     | 0.4   |
| hsa-mir-422b | MBL2      | 0.43  |
| hsa-mir-422b | MED18     | 0.22  |
| hsa-mir-422b | MFAP3L    | -0.44 |
| hsa-mir-422b | MGC102966 | 0.4   |
| hsa-mir-422b | MGC10981  | 0.42  |
| hsa-mir-422b | MGC3771   | -0.49 |
| hsa-mir-422b | MIPOL1    | 0.29  |
| hsa-mir-422b | MLANA     | 0.41  |
| hsa-mir-422b | MLPH      | 0.49  |
| hsa-mir-422b | MMP12     | 0.17  |
| hsa-mir-422b | MMRN1     | -0.33 |
| hsa-mir-422b | MPZL3     | 0.41  |
| hsa-mir-422b | MRGPRX3   | 0.48  |
| hsa-mir-422b | MS4A1     | 0.44  |
| hsa-mir-422b | MS4A3     | 0.51  |
| hsa-mir-422b | MSLN      | 0.36  |
| hsa-mir-422b | MSMB      | 0.49  |
| hsa-mir-422b | MSX2      | 0.37  |
| hsa-mir-422b | MTMR8     | 0.5   |
| hsa-mir-422b | MUC15     | 0.39  |
| hsa-mir-422b | MUC16     | 0.49  |

|              |          |       |
|--------------|----------|-------|
| hsa-mir-422b | MYEOV    | 0.41  |
| hsa-mir-422b | MYH2     | 0.42  |
| hsa-mir-422b | MYL1     | 0.38  |
| hsa-mir-422b | MYL7     | 0.53  |
| hsa-mir-422b | MYLC2PL  | 0.49  |
| hsa-mir-422b | MYPN     | 0.4   |
| hsa-mir-422b | NANOGP1  | 0.4   |
| hsa-mir-422b | NAT8     | 0.44  |
| hsa-mir-422b | NCAN     | -0.48 |
| hsa-mir-422b | NEK1     | -0.4  |
| hsa-mir-422b | NFASC    | -0.49 |
| hsa-mir-422b | NLRP7    | 0.44  |
| hsa-mir-422b | NOL4     | -0.52 |
| hsa-mir-422b | NOX5     | 0.47  |
| hsa-mir-422b | NPFFR2   | 0.37  |
| hsa-mir-422b | NR0B2    | 0.41  |
| hsa-mir-422b | NR1H4    | 0.33  |
| hsa-mir-422b | NRG4     | 0.48  |
| hsa-mir-422b | NTF3     | 0.43  |
| hsa-mir-422b | NTRK2    | -0.51 |
| hsa-mir-422b | NUP210L  | 0.4   |
| hsa-mir-422b | OAF      | 0.47  |
| hsa-mir-422b | ODAM     | 0.45  |
| hsa-mir-422b | OLFM2    | -0.38 |
| hsa-mir-422b | OR1D2    | 0.57  |
| hsa-mir-422b | OR2T2    | -0.42 |
| hsa-mir-422b | OR51B5   | 0.47  |
| hsa-mir-422b | OR51E1   | -0.23 |
| hsa-mir-422b | OR51I1   | 0.44  |
| hsa-mir-422b | OSTalpha | 0.41  |
| hsa-mir-422b | OTX2     | 0.52  |
| hsa-mir-422b | PAEP     | 0.41  |
| hsa-mir-422b | PAGE1    | 0.54  |
| hsa-mir-422b | PAGE2    | 0.35  |
| hsa-mir-422b | PAPPA    | 0.41  |
| hsa-mir-422b | PAX9     | 0.46  |
| hsa-mir-422b | PCK1     | 0.28  |
| hsa-mir-422b | PCSK9    | 0.4   |
| hsa-mir-422b | PCYT1B   | -0.52 |
| hsa-mir-422b | PDILT    | 0.45  |
| hsa-mir-422b | PIAS4    | 0.44  |
| hsa-mir-422b | PIWIL2   | 0.39  |
| hsa-mir-422b | PKLR     | 0.4   |
| hsa-mir-422b | PKP2     | 0.32  |
| hsa-mir-422b | PLA2G12B | 0.42  |
| hsa-mir-422b | PLEKHN1  | 0.46  |
| hsa-mir-422b | PNLIPRP2 | 0.42  |
| hsa-mir-422b | POTE15   | 0.44  |
| hsa-mir-422b | POU5F1P3 | 0.4   |
| hsa-mir-422b | POU5F1P4 | 0.29  |
| hsa-mir-422b | PPM1F    | 0.47  |
| hsa-mir-422b | PRAME    | 0.26  |
| hsa-mir-422b | PRAMEF8  | 0.42  |

|              |             |       |
|--------------|-------------|-------|
| hsa-mir-422b | PRAP1       | 0.49  |
| hsa-mir-422b | PRDM7       | 0.48  |
| hsa-mir-422b | PRDM9       | 0.53  |
| hsa-mir-422b | PRODH2      | 0.45  |
| hsa-mir-422b | PRSS1       | 0.41  |
| hsa-mir-422b | PRSS2       | 0.38  |
| hsa-mir-422b | PRSS21      | 0.44  |
| hsa-mir-422b | PRSS3       | 0.21  |
| hsa-mir-422b | PRSS7       | 0.43  |
| hsa-mir-422b | PSG6        | 0.52  |
| hsa-mir-422b | PTGFR       | 0.51  |
| hsa-mir-422b | PURG        | -0.51 |
| hsa-mir-422b | RAB25       | 0.4   |
| hsa-mir-422b | RAB39B      | -0.44 |
| hsa-mir-422b | RAET1E      | 0.45  |
| hsa-mir-422b | RBM35B      | 0.35  |
| hsa-mir-422b | RFTN2       | -0.56 |
| hsa-mir-422b | RHAG        | 0.38  |
| hsa-mir-422b | RHD         | 0.41  |
| hsa-mir-422b | RHEBL1      | 0.39  |
| hsa-mir-422b | RHOV        | 0.45  |
| hsa-mir-422b | RNF152      | -0.1  |
| hsa-mir-422b | RNF212      | 0.36  |
| hsa-mir-422b | ROS1        | 0.46  |
| hsa-mir-422b | RP4-692D3.1 | -0.52 |
| hsa-mir-422b | RTBDN       | -0.51 |
| hsa-mir-422b | S100A14     | 0.39  |
| hsa-mir-422b | SAGE1       | 0.35  |
| hsa-mir-422b | SCN3A       | -0.47 |
| hsa-mir-422b | SEMA3G      | 0.44  |
| hsa-mir-422b | SERPINA10   | 0.42  |
| hsa-mir-422b | SERPINA11   | 0.48  |
| hsa-mir-422b | SERPINA4    | 0.47  |
| hsa-mir-422b | SERPINA6    | 0.45  |
| hsa-mir-422b | SERPINA7    | 0.42  |
| hsa-mir-422b | SERPINB2    | 0.41  |
| hsa-mir-422b | SERPINB3    | 0.48  |
| hsa-mir-422b | SERPINB4    | 0.47  |
| hsa-mir-422b | SERPINB5    | 0.47  |
| hsa-mir-422b | SERPINI2    | -0.4  |
| hsa-mir-422b | SEZ6        | -0.47 |
| hsa-mir-422b | SH2D3A      | 0.44  |
| hsa-mir-422b | SH3RF2      | 0.34  |
| hsa-mir-422b | SLC12A3     | 0.47  |
| hsa-mir-422b | SLC17A2     | 0.52  |
| hsa-mir-422b | SLC23A1     | 0.43  |
| hsa-mir-422b | SLC25A21    | 0.33  |
| hsa-mir-422b | SLC2A2      | 0.4   |
| hsa-mir-422b | SLC39A5     | 0.41  |
| hsa-mir-422b | SLC44A4     | 0.5   |
| hsa-mir-422b | SLC45A2     | 0.49  |
| hsa-mir-422b | SLC6A4      | 0.51  |
| hsa-mir-422b | SLCO1B3     | 0.42  |

|              |           |       |
|--------------|-----------|-------|
| hsa-mir-422b | SMCR5     | 0.34  |
| hsa-mir-422b | SMPDL3B   | 0.44  |
| hsa-mir-422b | SOAT2     | 0.44  |
| hsa-mir-422b | SPANXC    | 0.47  |
| hsa-mir-422b | SPANXD    | 0.4   |
| hsa-mir-422b | SPATA4    | -0.45 |
| hsa-mir-422b | SPINK4    | 0.49  |
| hsa-mir-422b | SPINK5    | 0.47  |
| hsa-mir-422b | SPINK5L3  | 0.36  |
| hsa-mir-422b | SPRR1B    | 0.55  |
| hsa-mir-422b | SPRR2D    | 0.5   |
| hsa-mir-422b | SPRR3     | 0.4   |
| hsa-mir-422b | SPTA1     | 0.38  |
| hsa-mir-422b | SSX1      | 0.55  |
| hsa-mir-422b | SSX7      | 0.46  |
| hsa-mir-422b | STGC3     | 0.48  |
| hsa-mir-422b | SUHW1     | 0.44  |
| hsa-mir-422b | SULT1C4   | -0.52 |
| hsa-mir-422b | SULT2A1   | 0.48  |
| hsa-mir-422b | TBX10     | 0.48  |
| hsa-mir-422b | TDGF1     | 0.32  |
| hsa-mir-422b | TERT      | 0.39  |
| hsa-mir-422b | TJP3      | 0.42  |
| hsa-mir-422b | TM4SF19   | 0.45  |
| hsa-mir-422b | TM4SF5    | 0.41  |
| hsa-mir-422b | TMED6     | 0.41  |
| hsa-mir-422b | TMEM105   | 0.37  |
| hsa-mir-422b | TMEM16J   | 0.46  |
| hsa-mir-422b | TMEM83    | 0.41  |
| hsa-mir-422b | TMEM92    | 0.45  |
| hsa-mir-422b | TMOD2     | -0.46 |
| hsa-mir-422b | TMPRSS11F | 0.11  |
| hsa-mir-422b | TMPRSS4   | 0.46  |
| hsa-mir-422b | TNFRSF18  | 0.44  |
| hsa-mir-422b | TNNC1     | 0.39  |
| hsa-mir-422b | TNNI3K    | -0.54 |
| hsa-mir-422b | TP53TG3   | 0.25  |
| hsa-mir-422b | TRIM15    | 0.51  |
| hsa-mir-422b | TRIM37    | -0.5  |
| hsa-mir-422b | TRIM49    | 0.27  |
| hsa-mir-422b | TRPA1     | 0.43  |
| hsa-mir-422b | TRPM1     | 0.51  |
| hsa-mir-422b | TSGA10    | -0.39 |
| hsa-mir-422b | TSPY2     | 0.46  |
| hsa-mir-422b | TYR       | 0.38  |
| hsa-mir-422b | TYRP1     | 0.32  |
| hsa-mir-422b | UGT1A6    | 0.45  |
| hsa-mir-422b | UGT2B10   | 0.36  |
| hsa-mir-422b | UGT2B11   | 0.42  |
| hsa-mir-422b | UGT2B15   | 0.35  |
| hsa-mir-422b | UGT2B28   | 0.5   |
| hsa-mir-422b | UGT2B4    | 0.53  |
| hsa-mir-422b | UGT2B7    | 0.34  |

|                |          |       |
|----------------|----------|-------|
| hsa-mir-422b   | UMODL1   | 0.31  |
| hsa-mir-422b   | UNC93A   | 0.49  |
| hsa-mir-422b   | UPP2     | -0.49 |
| hsa-mir-422b   | USP44    | 0.3   |
| hsa-mir-422b   | UTS2     | 0.37  |
| hsa-mir-422b   | VIL1     | 0.47  |
| hsa-mir-422b   | WASL     | -0.32 |
| hsa-mir-422b   | WDR17    | -0.56 |
| hsa-mir-422b   | WIT1     | 0.36  |
| hsa-mir-422b   | XKR3     | 0.49  |
| hsa-mir-422b   | YIPF7    | -0.59 |
| hsa-mir-422b   | ZFP2     | -0.43 |
| hsa-mir-422b   | ZFP42    | 0.47  |
| hsa-mir-422b   | ZG16     | 0.44  |
| hsa-mir-422b   | ZNF287   | -0.45 |
| hsa-mir-422b   | ZNF366   | -0.47 |
| hsa-mir-422b   | ZNF396   | -0.51 |
| hsa-mir-422b   | ZNF501   | -0.39 |
| hsa-mir-422b   | ZNF599   | -0.46 |
| hsa-mir-422b   | ZNF750   | 0.29  |
| hsa-mir-424    | ABHD7    | -0.19 |
| hsa-mir-424    | AIFM3    | -0.27 |
| hsa-mir-424    | ALDH2    | -0.38 |
| hsa-mir-424    | C7       | -0.22 |
| hsa-mir-424    | CCK      | -0.14 |
| hsa-mir-424    | CDCA2    | 0.37  |
| hsa-mir-424    | CENPF    | 0.32  |
| hsa-mir-424    | CEP55    | 0.32  |
| hsa-mir-424    | CKAP2L   | 0.35  |
| hsa-mir-424    | CLEC4G   | -0.15 |
| hsa-mir-424    | COL9A1   | 0.15  |
| hsa-mir-424    | DEFA3    | -0.27 |
| hsa-mir-424    | DEFA4    | -0.25 |
| hsa-mir-424    | ENPP4    | -0.2  |
| hsa-mir-424    | FGF13    | -0.07 |
| hsa-mir-424    | GRIN2A   | -0.19 |
| hsa-mir-424    | GRM1     | -0.34 |
| hsa-mir-424    | HS3ST2   | -0.24 |
| hsa-mir-424    | LMO3     | -0.36 |
| hsa-mir-424    | MGC16121 | 0.4   |
| hsa-mir-424    | MYBPC1   | -0.37 |
| hsa-mir-424    | MYRIP    | -0.28 |
| hsa-mir-424    | PYGM     | -0.39 |
| hsa-mir-424    | RANBP3L  | -0.37 |
| hsa-mir-424    | SLC1A2   | -0.36 |
| hsa-mir-424    | SLC22A15 | -0.27 |
| hsa-mir-424    | SLC24A4  | -0.38 |
| hsa-mir-424    | SLC39A12 | -0.34 |
| hsa-mir-424    | SLCO1C1  | -0.25 |
| hsa-mir-424    | SYT1     | -0.14 |
| hsa-mir-424    | WNT4     | -0.09 |
| hsa-mir-425-5p | BMP5     | -0.17 |
| hsa-mir-425-5p | GPR4     | 0.25  |

|                |           |       |
|----------------|-----------|-------|
| hsa-mir-425-5p | NDST4     | -0.3  |
| hsa-mir-425-5p | NR0B1     | -0.25 |
| hsa-mir-425-5p | PARP3     | 0.35  |
| hsa-mir-425-5p | PNLIPRP2  | -0.19 |
| hsa-mir-425-5p | SPRR1B    | -0.32 |
| hsa-mir-425-5p | TP53TG3   | -0.31 |
| hsa-mir-425-5p | UGT2B28   | -0.27 |
| hsa-mir-429    | LRIG3     | 0.16  |
| hsa-mir-432    | ABCC2     | 0.26  |
| hsa-mir-432    | ABCG5     | 0.37  |
| hsa-mir-432    | ACF       | 0.26  |
| hsa-mir-432    | ACSM2B    | 0.28  |
| hsa-mir-432    | ACSM3     | 0.3   |
| hsa-mir-432    | ACTL8     | 0.32  |
| hsa-mir-432    | ADCY4     | -0.27 |
| hsa-mir-432    | AFP       | 0.31  |
| hsa-mir-432    | AGR2      | 0.26  |
| hsa-mir-432    | AHSG      | 0.29  |
| hsa-mir-432    | AKR1CL2   | 0.29  |
| hsa-mir-432    | ALB       | 0.35  |
| hsa-mir-432    | ALX1      | 0.27  |
| hsa-mir-432    | AMHR2     | 0.33  |
| hsa-mir-432    | AMPD1     | 0.15  |
| hsa-mir-432    | ANK2      | -0.1  |
| hsa-mir-432    | ANXA9     | 0.17  |
| hsa-mir-432    | APOA2     | 0.3   |
| hsa-mir-432    | APOA5     | 0.32  |
| hsa-mir-432    | APOH      | 0.31  |
| hsa-mir-432    | ART4      | 0.35  |
| hsa-mir-432    | ATAD4     | 0.28  |
| hsa-mir-432    | B3GNT4    | 0.48  |
| hsa-mir-432    | BAIAP2L1  | 0.29  |
| hsa-mir-432    | BDKRB1    | 0.3   |
| hsa-mir-432    | BMP4      | 0.34  |
| hsa-mir-432    | BSND      | 0.26  |
| hsa-mir-432    | C10orf122 | 0.33  |
| hsa-mir-432    | C10orf82  | 0.38  |
| hsa-mir-432    | C14orf115 | 0.31  |
| hsa-mir-432    | C14orf73  | 0.31  |
| hsa-mir-432    | C16orf73  | 0.35  |
| hsa-mir-432    | C18orf2   | 0.38  |
| hsa-mir-432    | C19orf21  | 0.31  |
| hsa-mir-432    | C21orf125 | 0.27  |
| hsa-mir-432    | C21orf62  | -0.34 |
| hsa-mir-432    | C3orf32   | 0.15  |
| hsa-mir-432    | C4BPB     | 0.3   |
| hsa-mir-432    | C5orf38   | 0.09  |
| hsa-mir-432    | C6orf156  | 0.2   |
| hsa-mir-432    | C8A       | 0.33  |
| hsa-mir-432    | C8B       | 0.34  |
| hsa-mir-432    | CALML5    | 0.3   |
| hsa-mir-432    | CAPN6     | 0.28  |
| hsa-mir-432    | CD8B      | 0.33  |



|             |          |       |
|-------------|----------|-------|
| hsa-mir-432 | CDH16    | 0.38  |
| hsa-mir-432 | CDH9     | 0.51  |
| hsa-mir-432 | CEACAM5  | 0.32  |
| hsa-mir-432 | CEACAM6  | 0.31  |
| hsa-mir-432 | CGA      | 0.32  |
| hsa-mir-432 | CLCA2    | 0.38  |
| hsa-mir-432 | CLDN6    | 0.32  |
| hsa-mir-432 | CLSTN3   | 0.49  |
| hsa-mir-432 | CPB2     | 0.31  |
| hsa-mir-432 | CPN1     | 0.31  |
| hsa-mir-432 | CREB3L3  | 0.46  |
| hsa-mir-432 | CRYBA1   | 0.08  |
| hsa-mir-432 | CTCFL    | 0.35  |
| hsa-mir-432 | CYP1A1   | 0.35  |
| hsa-mir-432 | CYP2F1   | 0.37  |
| hsa-mir-432 | DMBX1    | 0.16  |
| hsa-mir-432 | DNAH8    | 0.29  |
| hsa-mir-432 | DNMT3L   | 0.29  |
| hsa-mir-432 | DPYSL5   | -0.3  |
| hsa-mir-432 | DQX1     | 0.2   |
| hsa-mir-432 | DRD5     | 0.43  |
| hsa-mir-432 | DSCR8    | 0.29  |
| hsa-mir-432 | DUSP2    | 0.37  |
| hsa-mir-432 | ELA2A    | 0.25  |
| hsa-mir-432 | ELA3A    | 0.27  |
| hsa-mir-432 | ELTD1    | -0.34 |
| hsa-mir-432 | EPGN     | 0.36  |
| hsa-mir-432 | EPS8L1   | 0.2   |
| hsa-mir-432 | ESX1     | 0.31  |
| hsa-mir-432 | F2       | 0.29  |
| hsa-mir-432 | FAM130A2 | -0.04 |
| hsa-mir-432 | FAM5B    | -0.05 |
| hsa-mir-432 | FAM83A   | 0.39  |
| hsa-mir-432 | FAM9B    | 0.33  |
| hsa-mir-432 | FBXL21   | 0.4   |
| hsa-mir-432 | FGA      | 0.33  |
| hsa-mir-432 | FGB      | 0.33  |
| hsa-mir-432 | FGF19    | 0.22  |
| hsa-mir-432 | FGG      | 0.31  |
| hsa-mir-432 | FLJ21075 | 0.34  |
| hsa-mir-432 | FLJ34047 | 0.53  |
| hsa-mir-432 | FLJ35767 | 0.16  |
| hsa-mir-432 | FLJ36208 | 0.19  |
| hsa-mir-432 | FLJ46111 | 0.28  |
| hsa-mir-432 | FOXA1    | 0.14  |
| hsa-mir-432 | FOXA2    | 0.25  |
| hsa-mir-432 | FRAS1    | 0.31  |
| hsa-mir-432 | FTCD     | 0.45  |
| hsa-mir-432 | G6PC     | 0.35  |
| hsa-mir-432 | GABRG3   | 0.46  |
| hsa-mir-432 | GDA      | 0.46  |
| hsa-mir-432 | GDPD5    | 0.4   |
| hsa-mir-432 | GFI1B    | 0.33  |

|             |          |       |
|-------------|----------|-------|
| hsa-mir-432 | GLIS1    | 0.34  |
| hsa-mir-432 | GLRA3    | 0.42  |
| hsa-mir-432 | GPC3     | 0.31  |
| hsa-mir-432 | GPR75    | -0.31 |
| hsa-mir-432 | GPX2     | 0.33  |
| hsa-mir-432 | GRAP2    | 0.2   |
| hsa-mir-432 | GRIN2A   | 0.46  |
| hsa-mir-432 | GSTA3    | 0.38  |
| hsa-mir-432 | GSTA5    | 0.26  |
| hsa-mir-432 | GYPB     | 0.35  |
| hsa-mir-432 | GYPE     | 0.44  |
| hsa-mir-432 | HAND1    | 0.39  |
| hsa-mir-432 | HBG2     | 0.36  |
| hsa-mir-432 | HEMGN    | 0.33  |
| hsa-mir-432 | HFE2     | 0.31  |
| hsa-mir-432 | HOOK1    | 0.48  |
| hsa-mir-432 | HOXB9    | 0.26  |
| hsa-mir-432 | HSH2D    | 0.24  |
| hsa-mir-432 | HTR1E    | 0.52  |
| hsa-mir-432 | ICAM4    | 0.28  |
| hsa-mir-432 | IGF2BP1  | 0.27  |
| hsa-mir-432 | IL23R    | 0.33  |
| hsa-mir-432 | INSL4    | 0.3   |
| hsa-mir-432 | INSL5    | -0.38 |
| hsa-mir-432 | ISL1     | 0.29  |
| hsa-mir-432 | ITIH3    | 0.31  |
| hsa-mir-432 | KCNG3    | 0.49  |
| hsa-mir-432 | KIAA1086 | 0.52  |
| hsa-mir-432 | KIAA1543 | 0.46  |
| hsa-mir-432 | KIF17    | 0.09  |
| hsa-mir-432 | KLF1     | 0.35  |
| hsa-mir-432 | KLK10    | 0.5   |
| hsa-mir-432 | KLK11    | 0.29  |
| hsa-mir-432 | KLK7     | 0.51  |
| hsa-mir-432 | KLK8     | 0.41  |
| hsa-mir-432 | KRT12    | 0.28  |
| hsa-mir-432 | KRT13    | 0.32  |
| hsa-mir-432 | KRT16    | 0.36  |
| hsa-mir-432 | KRT33A   | 0.33  |
| hsa-mir-432 | KRT34    | 0.22  |
| hsa-mir-432 | KRT37    | 0.33  |
| hsa-mir-432 | KRT6A    | 0.3   |
| hsa-mir-432 | KRT6B    | 0.18  |
| hsa-mir-432 | KRT6C    | 0.32  |
| hsa-mir-432 | KRT86    | 0.35  |
| hsa-mir-432 | KRTAP1-5 | 0.28  |
| hsa-mir-432 | KRTAP3-1 | 0.3   |
| hsa-mir-432 | KRTDAP   | 0.42  |
| hsa-mir-432 | LCT      | 0.34  |
| hsa-mir-432 | LDLRAD1  | 0.36  |
| hsa-mir-432 | LGR5     | 0.32  |
| hsa-mir-432 | LIN28    | 0.35  |
| hsa-mir-432 | LIN28B   | 0.39  |

|             |             |       |
|-------------|-------------|-------|
| hsa-mir-432 | 22NC03-75B3 | 0.56  |
| hsa-mir-432 | LOC129293   | 0.43  |
| hsa-mir-432 | LOC441601   | 0.38  |
| hsa-mir-432 | LOC91461    | 0.41  |
| hsa-mir-432 | LTB4R       | 0.29  |
| hsa-mir-432 | MAGEA8      | 0.36  |
| hsa-mir-432 | MAGEA9      | 0.26  |
| hsa-mir-432 | MAGEC1      | 0.29  |
| hsa-mir-432 | MAGEC2      | 0.19  |
| hsa-mir-432 | MAPRE3      | 0.14  |
| hsa-mir-432 | MAT1A       | 0.2   |
| hsa-mir-432 | MATK        | 0.57  |
| hsa-mir-432 | MGC102966   | 0.33  |
| hsa-mir-432 | MGC45800    | 0.28  |
| hsa-mir-432 | MGC5566     | 0.49  |
| hsa-mir-432 | MKX         | 0.36  |
| hsa-mir-432 | MLANA       | 0.25  |
| hsa-mir-432 | MMRN1       | -0.39 |
| hsa-mir-432 | MRGPRX3     | 0.33  |
| hsa-mir-432 | MS4A1       | 0.25  |
| hsa-mir-432 | MS4A3       | 0.32  |
| hsa-mir-432 | MSMB        | 0.33  |
| hsa-mir-432 | MUC16       | 0.33  |
| hsa-mir-432 | MYEOV       | 0.3   |
| hsa-mir-432 | MYH2        | 0.33  |
| hsa-mir-432 | MYL1        | 0.34  |
| hsa-mir-432 | MYL7        | 0.4   |
| hsa-mir-432 | MYLC2PL     | 0.38  |
| hsa-mir-432 | MYPN        | 0.36  |
| hsa-mir-432 | NANOGP1     | 0.23  |
| hsa-mir-432 | NAT8        | 0.29  |
| hsa-mir-432 | NLRP7       | 0.3   |
| hsa-mir-432 | NOX5        | 0.38  |
| hsa-mir-432 | NPFFR2      | 0.46  |
| hsa-mir-432 | NR0B2       | 0.29  |
| hsa-mir-432 | NRG4        | 0.43  |
| hsa-mir-432 | NTF3        | 0.33  |
| hsa-mir-432 | OCA2        | 0.45  |
| hsa-mir-432 | ODAM        | 0.3   |
| hsa-mir-432 | OR1D2       | 0.43  |
| hsa-mir-432 | OR51B5      | 0.34  |
| hsa-mir-432 | OR51E1      | -0.31 |
| hsa-mir-432 | OR51I1      | 0.33  |
| hsa-mir-432 | OSTalpha    | 0.29  |
| hsa-mir-432 | OTX2        | 0.31  |
| hsa-mir-432 | P2RX5       | 0.42  |
| hsa-mir-432 | PAEP        | 0.15  |
| hsa-mir-432 | PAGE1       | 0.3   |
| hsa-mir-432 | PAGE2       | 0.14  |
| hsa-mir-432 | PDILT       | 0.36  |
| hsa-mir-432 | PIWIL2      | 0.33  |
| hsa-mir-432 | PLA2G3      | 0.37  |
| hsa-mir-432 | PLAC2       | 0.47  |

|             |           |       |
|-------------|-----------|-------|
| hsa-mir-432 | PNLIPRP2  | 0.36  |
| hsa-mir-432 | POTE15    | 0.3   |
| hsa-mir-432 | POU5F1P3  | 0.3   |
| hsa-mir-432 | POU5F1P4  | 0.32  |
| hsa-mir-432 | PRAMEF8   | 0.26  |
| hsa-mir-432 | PRAP1     | 0.36  |
| hsa-mir-432 | PRDM7     | 0.32  |
| hsa-mir-432 | PRDM9     | 0.34  |
| hsa-mir-432 | PRG2      | 0.47  |
| hsa-mir-432 | PRODH2    | 0.31  |
| hsa-mir-432 | PRSS1     | 0.52  |
| hsa-mir-432 | PRSS2     | 0.54  |
| hsa-mir-432 | PRSS21    | 0.28  |
| hsa-mir-432 | PRSS3     | 0.53  |
| hsa-mir-432 | PSG6      | 0.3   |
| hsa-mir-432 | PTPRU     | 0.25  |
| hsa-mir-432 | RAB25     | 0.3   |
| hsa-mir-432 | RASGRF1   | 0.48  |
| hsa-mir-432 | RHAG      | 0.31  |
| hsa-mir-432 | RHOV      | 0.38  |
| hsa-mir-432 | RNF183    | 0.24  |
| hsa-mir-432 | RNF212    | 0.37  |
| hsa-mir-432 | RTDR1     | -0.23 |
| hsa-mir-432 | S100A14   | 0.3   |
| hsa-mir-432 | SAGE1     | 0.25  |
| hsa-mir-432 | SEMA3G    | 0.46  |
| hsa-mir-432 | SERPINA10 | 0.27  |
| hsa-mir-432 | SERPINA11 | 0.34  |
| hsa-mir-432 | SERPINA4  | 0.37  |
| hsa-mir-432 | SERPINA6  | 0.29  |
| hsa-mir-432 | SERPINA7  | 0.28  |
| hsa-mir-432 | SERPINB2  | 0.29  |
| hsa-mir-432 | SERPINB3  | 0.29  |
| hsa-mir-432 | SERPINB4  | 0.3   |
| hsa-mir-432 | SERPINB5  | 0.29  |
| hsa-mir-432 | SLC12A3   | 0.31  |
| hsa-mir-432 | SLC13A5   | 0.38  |
| hsa-mir-432 | SLC17A2   | 0.37  |
| hsa-mir-432 | SLC1A6    | 0.42  |
| hsa-mir-432 | SLC23A1   | 0.28  |
| hsa-mir-432 | SLC30A8   | 0.31  |
| hsa-mir-432 | SLC44A4   | 0.27  |
| hsa-mir-432 | SLC45A2   | 0.39  |
| hsa-mir-432 | SLC6A15   | 0.47  |
| hsa-mir-432 | SLC6A4    | 0.38  |
| hsa-mir-432 | SMCR5     | 0.31  |
| hsa-mir-432 | SMPDL3B   | 0.31  |
| hsa-mir-432 | SNX16     | -0.15 |
| hsa-mir-432 | SPINK4    | 0.3   |
| hsa-mir-432 | SPINK5    | 0.3   |
| hsa-mir-432 | SPRR1B    | 0.42  |
| hsa-mir-432 | SPRR3     | 0.27  |
| hsa-mir-432 | SSX1      | 0.35  |

|             |         |       |
|-------------|---------|-------|
| hsa-mir-432 | SSX7    | 0.32  |
| hsa-mir-432 | STGC3   | 0.25  |
| hsa-mir-432 | STK32C  | 0.51  |
| hsa-mir-432 | SULT2A1 | 0.32  |
| hsa-mir-432 | SYNGR3  | 0.56  |
| hsa-mir-432 | SYTL1   | 0.29  |
| hsa-mir-432 | TBX10   | 0.32  |
| hsa-mir-432 | TDGF1   | 0.33  |
| hsa-mir-432 | TERT    | 0.22  |
| hsa-mir-432 | TM4SF5  | 0.3   |
| hsa-mir-432 | TMEM105 | 0.19  |
| hsa-mir-432 | TMEM16J | 0.38  |
| hsa-mir-432 | TMPRSS4 | 0.31  |
| hsa-mir-432 | TNNC1   | 0.33  |
| hsa-mir-432 | TPO     | 0.45  |
| hsa-mir-432 | TRIM15  | 0.32  |
| hsa-mir-432 | TRPM1   | 0.37  |
| hsa-mir-432 | TSPY2   | 0.31  |
| hsa-mir-432 | TUBAL3  | 0.23  |
| hsa-mir-432 | TYR     | 0.26  |
| hsa-mir-432 | TYRP1   | 0.41  |
| hsa-mir-432 | UGT2B11 | 0.27  |
| hsa-mir-432 | UGT2B28 | 0.37  |
| hsa-mir-432 | UGT2B4  | 0.35  |
| hsa-mir-432 | UNC93A  | 0.35  |
| hsa-mir-432 | UTS2    | 0.17  |
| hsa-mir-432 | VIL1    | 0.34  |
| hsa-mir-432 | WBSCR17 | 0.41  |
| hsa-mir-432 | XKR3    | 0.23  |
| hsa-mir-432 | YIPF7   | -0.32 |
| hsa-mir-448 | AP2M1   | 0.35  |
| hsa-mir-448 | BAG3    | 0.16  |
| hsa-mir-448 | CLCN2   | 0.3   |
| hsa-mir-448 | DVL3    | 0.36  |
| hsa-mir-448 | ECE2    | 0.22  |
| hsa-mir-448 | EIF4G1  | 0.32  |
| hsa-mir-448 | GPR128  | 0.33  |
| hsa-mir-448 | LAMP3   | 0.29  |
| hsa-mir-448 | MCF2L2  | 0.33  |
| hsa-mir-448 | NTS     | 0.3   |
| hsa-mir-448 | PSMD2   | 0.35  |
| hsa-mir-448 | TBX1    | 0.24  |
| hsa-mir-448 | UPP2    | 0.24  |
| hsa-mir-449 | AADAC   | -0.47 |
| hsa-mir-449 | ABCC2   | -0.49 |
| hsa-mir-449 | ABCG5   | -0.53 |
| hsa-mir-449 | ACF     | -0.54 |
| hsa-mir-449 | ACSM1   | -0.42 |
| hsa-mir-449 | ACSM2B  | -0.57 |
| hsa-mir-449 | ACSM3   | -0.53 |
| hsa-mir-449 | ACTBL1  | -0.54 |
| hsa-mir-449 | ACTL8   | -0.56 |
| hsa-mir-449 | ADCY4   | 0.43  |

|             |           |       |
|-------------|-----------|-------|
| hsa-mir-449 | ADH4      | -0.52 |
| hsa-mir-449 | ADH6      | -0.39 |
| hsa-mir-449 | AFP       | -0.5  |
| hsa-mir-449 | AGR2      | -0.47 |
| hsa-mir-449 | AHSG      | -0.4  |
| hsa-mir-449 | AKR1CL2   | -0.56 |
| hsa-mir-449 | ALB       | -0.57 |
| hsa-mir-449 | ALS2CR11  | -0.36 |
| hsa-mir-449 | ALX1      | -0.41 |
| hsa-mir-449 | AMHR2     | -0.61 |
| hsa-mir-449 | AMPD1     | -0.42 |
| hsa-mir-449 | AMTN      | -0.51 |
| hsa-mir-449 | ANKRD21   | -0.51 |
| hsa-mir-449 | ANXA10    | -0.28 |
| hsa-mir-449 | ANXA9     | -0.43 |
| hsa-mir-449 | APOA2     | -0.47 |
| hsa-mir-449 | APOA5     | -0.57 |
| hsa-mir-449 | APOB      | -0.39 |
| hsa-mir-449 | APOC3     | -0.43 |
| hsa-mir-449 | APOF      | -0.48 |
| hsa-mir-449 | APOH      | -0.52 |
| hsa-mir-449 | AQP3      | -0.48 |
| hsa-mir-449 | AQP4      | 0.23  |
| hsa-mir-449 | ARHGEF16  | -0.24 |
| hsa-mir-449 | ARHGEF6   | 0.3   |
| hsa-mir-449 | ARL14     | -0.43 |
| hsa-mir-449 | ART4      | -0.63 |
| hsa-mir-449 | ART5      | -0.24 |
| hsa-mir-449 | ASGR2     | -0.41 |
| hsa-mir-449 | ASTN1     | 0.33  |
| hsa-mir-449 | ATAD4     | -0.56 |
| hsa-mir-449 | ATP6V0A4  | -0.23 |
| hsa-mir-449 | AURKC     | -0.39 |
| hsa-mir-449 | BAAT      | -0.59 |
| hsa-mir-449 | BAIAP2L1  | -0.46 |
| hsa-mir-449 | BDKRB1    | -0.44 |
| hsa-mir-449 | BLK       | -0.26 |
| hsa-mir-449 | BMP5      | -0.26 |
| hsa-mir-449 | BSND      | -0.46 |
| hsa-mir-449 | C10orf122 | -0.56 |
| hsa-mir-449 | C10orf63  | 0.28  |
| hsa-mir-449 | C10orf82  | -0.46 |
| hsa-mir-449 | C12orf56  | -0.44 |
| hsa-mir-449 | C14orf115 | -0.55 |
| hsa-mir-449 | C14orf152 | 0.27  |
| hsa-mir-449 | C14orf73  | -0.56 |
| hsa-mir-449 | C15orf26  | -0.08 |
| hsa-mir-449 | C16orf73  | -0.59 |
| hsa-mir-449 | C18orf2   | -0.58 |
| hsa-mir-449 | C18orf34  | 0.42  |
| hsa-mir-449 | C19orf21  | -0.53 |
| hsa-mir-449 | C19orf46  | -0.38 |
| hsa-mir-449 | C1orf172  | -0.36 |

|             |           |       |
|-------------|-----------|-------|
| hsa-mir-449 | C20orf26  | 0.46  |
| hsa-mir-449 | C21orf125 | -0.59 |
| hsa-mir-449 | C21orf62  | 0.32  |
| hsa-mir-449 | C21orf90  | -0.47 |
| hsa-mir-449 | C2orf48   | -0.46 |
| hsa-mir-449 | C4BPA     | -0.34 |
| hsa-mir-449 | C4BPB     | -0.51 |
| hsa-mir-449 | C4orf7    | -0.27 |
| hsa-mir-449 | C5orf38   | -0.28 |
| hsa-mir-449 | C6orf123  | 0.52  |
| hsa-mir-449 | C6orf156  | -0.39 |
| hsa-mir-449 | C8A       | -0.6  |
| hsa-mir-449 | C8B       | -0.52 |
| hsa-mir-449 | C9orf68   | 0.45  |
| hsa-mir-449 | C9orf69   | -0.32 |
| hsa-mir-449 | C9orf98   | 0.37  |
| hsa-mir-449 | CALML3    | -0.45 |
| hsa-mir-449 | CALML5    | -0.56 |
| hsa-mir-449 | CAPN6     | -0.44 |
| hsa-mir-449 | CARD11    | -0.57 |
| hsa-mir-449 | CASC1     | 0.36  |
| hsa-mir-449 | CCNE1     | -0.08 |
| hsa-mir-449 | CD1A      | -0.37 |
| hsa-mir-449 | CD1C      | -0.34 |
| hsa-mir-449 | CD1E      | -0.48 |
| hsa-mir-449 | CD34      | 0.45  |
| hsa-mir-449 | CD8B      | -0.45 |
| hsa-mir-449 | CDH16     | -0.57 |
| hsa-mir-449 | CDH9      | -0.43 |
| hsa-mir-449 | CEACAM1   | -0.51 |
| hsa-mir-449 | CEACAM5   | -0.59 |
| hsa-mir-449 | CEACAM6   | -0.52 |
| hsa-mir-449 | CES1      | -0.39 |
| hsa-mir-449 | CGA       | -0.49 |
| hsa-mir-449 | CHMP4C    | -0.3  |
| hsa-mir-449 | CLCA2     | -0.56 |
| hsa-mir-449 | CLDN6     | -0.57 |
| hsa-mir-449 | CLEC14A   | 0.34  |
| hsa-mir-449 | CLSTN3    | -0.55 |
| hsa-mir-449 | COL2A1    | -0.44 |
| hsa-mir-449 | CPB2      | -0.54 |
| hsa-mir-449 | CPN1      | -0.57 |
| hsa-mir-449 | CR1L      | -0.38 |
| hsa-mir-449 | CREB3L3   | -0.61 |
| hsa-mir-449 | CRYBA1    | -0.24 |
| hsa-mir-449 | CTCFL     | -0.56 |
| hsa-mir-449 | CXorf36   | 0.5   |
| hsa-mir-449 | CYP1A1    | -0.57 |
| hsa-mir-449 | CYP24A1   | -0.42 |
| hsa-mir-449 | CYP2F1    | -0.61 |
| hsa-mir-449 | DAZL      | -0.2  |
| hsa-mir-449 | DEFB103A  | -0.32 |
| hsa-mir-449 | DERL3     | -0.55 |

|             |          |       |
|-------------|----------|-------|
| hsa-mir-449 | DGAT2    | -0.28 |
| hsa-mir-449 | DHX38    | -0.42 |
| hsa-mir-449 | DIO1     | -0.48 |
| hsa-mir-449 | DLK1     | -0.24 |
| hsa-mir-449 | DMBX1    | -0.25 |
| hsa-mir-449 | DNAH10   | 0.41  |
| hsa-mir-449 | DNAH7    | 0.37  |
| hsa-mir-449 | DNAH8    | -0.51 |
| hsa-mir-449 | DNMT3L   | -0.54 |
| hsa-mir-449 | DOHH     | -0.52 |
| hsa-mir-449 | DPPA2    | -0.37 |
| hsa-mir-449 | DPYSL5   | 0.59  |
| hsa-mir-449 | DQX1     | -0.41 |
| hsa-mir-449 | DRD5     | -0.21 |
| hsa-mir-449 | DSCR6    | -0.1  |
| hsa-mir-449 | DSCR8    | -0.55 |
| hsa-mir-449 | DSG2     | -0.37 |
| hsa-mir-449 | DUSP13   | -0.39 |
| hsa-mir-449 | ECEL1    | -0.17 |
| hsa-mir-449 | ELA2A    | -0.28 |
| hsa-mir-449 | ELA3A    | -0.49 |
| hsa-mir-449 | ELN      | 0.41  |
| hsa-mir-449 | ELTD1    | 0.46  |
| hsa-mir-449 | EMCN     | 0.38  |
| hsa-mir-449 | ENPP3    | -0.44 |
| hsa-mir-449 | EPGN     | -0.59 |
| hsa-mir-449 | EPS8L1   | -0.4  |
| hsa-mir-449 | ESX1     | -0.48 |
| hsa-mir-449 | F10      | -0.44 |
| hsa-mir-449 | F2       | -0.49 |
| hsa-mir-449 | F3       | 0.32  |
| hsa-mir-449 | FAIM3    | -0.36 |
| hsa-mir-449 | FAM112B  | -0.38 |
| hsa-mir-449 | FAM130A2 | 0.37  |
| hsa-mir-449 | FAM83A   | -0.65 |
| hsa-mir-449 | FAM83B   | -0.59 |
| hsa-mir-449 | FAM9B    | -0.61 |
| hsa-mir-449 | FBXL21   | -0.64 |
| hsa-mir-449 | FGA      | -0.54 |
| hsa-mir-449 | FGB      | -0.51 |
| hsa-mir-449 | FGF19    | -0.48 |
| hsa-mir-449 | FGF23    | -0.48 |
| hsa-mir-449 | FGG      | -0.51 |
| hsa-mir-449 | FGL2     | 0.4   |
| hsa-mir-449 | FHL5     | 0.49  |
| hsa-mir-449 | FLJ21075 | -0.61 |
| hsa-mir-449 | FLJ25801 | -0.44 |
| hsa-mir-449 | FLJ32658 | -0.48 |
| hsa-mir-449 | FLJ34047 | -0.43 |
| hsa-mir-449 | FLJ35880 | -0.51 |
| hsa-mir-449 | FLJ36208 | -0.5  |
| hsa-mir-449 | FLJ40298 | 0.41  |
| hsa-mir-449 | FLJ40504 | -0.34 |



|             |          |       |
|-------------|----------|-------|
| hsa-mir-449 | FLJ46111 | -0.49 |
| hsa-mir-449 | FOXA1    | -0.36 |
| hsa-mir-449 | FOXA2    | -0.42 |
| hsa-mir-449 | FOXA3    | -0.35 |
| hsa-mir-449 | FTCD     | -0.58 |
| hsa-mir-449 | FUS      | -0.36 |
| hsa-mir-449 | FUT3     | -0.39 |
| hsa-mir-449 | G6PC     | -0.55 |
| hsa-mir-449 | GABRE    | -0.26 |
| hsa-mir-449 | GABRG3   | -0.4  |
| hsa-mir-449 | GAGE1    | -0.57 |
| hsa-mir-449 | GATA2    | -0.54 |
| hsa-mir-449 | GATA3    | -0.39 |
| hsa-mir-449 | GCNT3    | -0.57 |
| hsa-mir-449 | GDF3     | -0.37 |
| hsa-mir-449 | GDF6     | -0.36 |
| hsa-mir-449 | GDPD5    | -0.38 |
| hsa-mir-449 | GFI1     | -0.29 |
| hsa-mir-449 | GFI1B    | -0.59 |
| hsa-mir-449 | GJA4     | 0.45  |
| hsa-mir-449 | GJB7     | -0.56 |
| hsa-mir-449 | GJE1     | -0.2  |
| hsa-mir-449 | GLRA3    | -0.34 |
| hsa-mir-449 | GLULD1   | -0.07 |
| hsa-mir-449 | GNA13    | 0.51  |
| hsa-mir-449 | GPER     | 0.29  |
| hsa-mir-449 | GPR116   | 0.34  |
| hsa-mir-449 | GPR157   | -0.41 |
| hsa-mir-449 | GPR174   | -0.44 |
| hsa-mir-449 | GPR34    | 0.38  |
| hsa-mir-449 | GPR4     | 0.38  |
| hsa-mir-449 | GPR75    | 0.49  |
| hsa-mir-449 | GPX2     | -0.52 |
| hsa-mir-449 | GRAP2    | -0.43 |
| hsa-mir-449 | GRIK4    | 0.36  |
| hsa-mir-449 | GSTA3    | -0.47 |
| hsa-mir-449 | GSTA5    | -0.39 |
| hsa-mir-449 | GUCY1A2  | 0.33  |
| hsa-mir-449 | GYPB     | -0.65 |
| hsa-mir-449 | GYPC     | -0.41 |
| hsa-mir-449 | GYPE     | -0.64 |
| hsa-mir-449 | HAND1    | -0.58 |
| hsa-mir-449 | HBE1     | -0.42 |
| hsa-mir-449 | HBG2     | -0.53 |
| hsa-mir-449 | HDAC10   | -0.37 |
| hsa-mir-449 | HEMGN    | -0.4  |
| hsa-mir-449 | HEPACAM  | 0.2   |
| hsa-mir-449 | HFE2     | -0.53 |
| hsa-mir-449 | HOOK1    | -0.33 |
| hsa-mir-449 | HORMAD1  | -0.44 |
| hsa-mir-449 | HORMAD2  | 0.46  |
| hsa-mir-449 | HOXB9    | -0.36 |
| hsa-mir-449 | HOXC12   | -0.42 |

|             |           |       |
|-------------|-----------|-------|
| hsa-mir-449 | HPDL      | -0.41 |
| hsa-mir-449 | HPN       | -0.51 |
| hsa-mir-449 | HSD17B2   | -0.32 |
| hsa-mir-449 | HSH2D     | -0.54 |
| hsa-mir-449 | ICAM4     | -0.56 |
| hsa-mir-449 | ICEBERG   | -0.37 |
| hsa-mir-449 | IGF2AS    | -0.05 |
| hsa-mir-449 | IGF2BP1   | -0.48 |
| hsa-mir-449 | IGFBPL1   | -0.12 |
| hsa-mir-449 | IGLV2-14  | -0.62 |
| hsa-mir-449 | IGSF6     | 0.39  |
| hsa-mir-449 | IL11      | -0.32 |
| hsa-mir-449 | IL1A      | 0.38  |
| hsa-mir-449 | IL22RA1   | -0.45 |
| hsa-mir-449 | IL23R     | -0.6  |
| hsa-mir-449 | IL33      | 0.35  |
| hsa-mir-449 | INSL4     | -0.46 |
| hsa-mir-449 | INSL5     | 0.58  |
| hsa-mir-449 | IRX1      | -0.04 |
| hsa-mir-449 | IRX4      | -0.24 |
| hsa-mir-449 | ISL1      | -0.33 |
| hsa-mir-449 | ISX       | -0.52 |
| hsa-mir-449 | ITIH3     | -0.5  |
| hsa-mir-449 | KBTBD3    | 0.41  |
| hsa-mir-449 | KCNG3     | -0.48 |
| hsa-mir-449 | KCNK13    | 0.45  |
| hsa-mir-449 | KCNK5     | -0.36 |
| hsa-mir-449 | KDR       | 0.43  |
| hsa-mir-449 | KIAA0825  | -0.5  |
| hsa-mir-449 | KIAA1086  | -0.36 |
| hsa-mir-449 | KIAA1383  | 0.38  |
| hsa-mir-449 | KIAA1822L | -0.33 |
| hsa-mir-449 | KIAA1909  | -0.1  |
| hsa-mir-449 | KIFC3     | -0.54 |
| hsa-mir-449 | KLF1      | -0.58 |
| hsa-mir-449 | KLF7      | 0.4   |
| hsa-mir-449 | KLK1      | -0.46 |
| hsa-mir-449 | KLK10     | -0.52 |
| hsa-mir-449 | KLK11     | -0.51 |
| hsa-mir-449 | KLK12     | -0.36 |
| hsa-mir-449 | KLK8      | -0.52 |
| hsa-mir-449 | KNG1      | -0.42 |
| hsa-mir-449 | KRT12     | -0.49 |
| hsa-mir-449 | KRT13     | -0.53 |
| hsa-mir-449 | KRT15     | -0.28 |
| hsa-mir-449 | KRT16     | -0.54 |
| hsa-mir-449 | KRT23     | -0.38 |
| hsa-mir-449 | KRT33A    | -0.57 |
| hsa-mir-449 | KRT34     | -0.49 |
| hsa-mir-449 | KRT37     | -0.58 |
| hsa-mir-449 | KRT6A     | -0.57 |
| hsa-mir-449 | KRT6B     | -0.44 |
| hsa-mir-449 | KRT6C     | -0.61 |

|             |           |       |
|-------------|-----------|-------|
| hsa-mir-449 | KRT75     | -0.14 |
| hsa-mir-449 | KRT86     | -0.59 |
| hsa-mir-449 | KRTAP1-5  | -0.55 |
| hsa-mir-449 | KRTAP3-1  | -0.57 |
| hsa-mir-449 | KRTDAP    | -0.55 |
| hsa-mir-449 | L1TD1     | -0.49 |
| hsa-mir-449 | LCT       | -0.55 |
| hsa-mir-449 | LDHC      | -0.27 |
| hsa-mir-449 | LDLRAD1   | -0.63 |
| hsa-mir-449 | LIN28     | -0.52 |
| hsa-mir-449 | LIN28B    | -0.42 |
| hsa-mir-449 | LMOD1     | 0.39  |
| hsa-mir-449 | LOC129293 | -0.5  |
| hsa-mir-449 | LOC399900 | -0.36 |
| hsa-mir-449 | LOC441376 | -0.4  |
| hsa-mir-449 | LOC441601 | -0.65 |
| hsa-mir-449 | LOC554207 | -0.33 |
| hsa-mir-449 | LOC91461  | -0.5  |
| hsa-mir-449 | LTB4R     | -0.56 |
| hsa-mir-449 | MAEL      | 0.37  |
| hsa-mir-449 | MAGEA1    | -0.39 |
| hsa-mir-449 | MAGEA10   | -0.5  |
| hsa-mir-449 | MAGEA4    | -0.47 |
| hsa-mir-449 | MAGEA5    | -0.54 |
| hsa-mir-449 | MAGEA8    | -0.64 |
| hsa-mir-449 | MAGEA9    | -0.51 |
| hsa-mir-449 | MAGEB6    | -0.48 |
| hsa-mir-449 | MAGEC1    | -0.54 |
| hsa-mir-449 | MAGEC2    | -0.38 |
| hsa-mir-449 | MAGEE2    | 0.28  |
| hsa-mir-449 | MAP2      | 0.38  |
| hsa-mir-449 | MAP2K7    | 0.38  |
| hsa-mir-449 | MAPK12    | -0.45 |
| hsa-mir-449 | MAT1A     | -0.37 |
| hsa-mir-449 | MBL2      | -0.51 |
| hsa-mir-449 | MED18     | -0.14 |
| hsa-mir-449 | MFAP3L    | 0.26  |
| hsa-mir-449 | MGC102966 | -0.45 |
| hsa-mir-449 | MGC10981  | -0.55 |
| hsa-mir-449 | MGC45800  | -0.28 |
| hsa-mir-449 | MIA2      | -0.57 |
| hsa-mir-449 | MIPOL1    | -0.44 |
| hsa-mir-449 | MIRH1     | -0.34 |
| hsa-mir-449 | MLANA     | -0.47 |
| hsa-mir-449 | MLPH      | -0.39 |
| hsa-mir-449 | MMP12     | 0.03  |
| hsa-mir-449 | MMRN1     | 0.5   |
| hsa-mir-449 | MOGAT2    | -0.34 |
| hsa-mir-449 | MPZL3     | -0.47 |
| hsa-mir-449 | MRGPRX3   | -0.59 |
| hsa-mir-449 | MS4A1     | -0.56 |
| hsa-mir-449 | MS4A3     | -0.61 |
| hsa-mir-449 | MSLN      | -0.41 |

|             |          |       |
|-------------|----------|-------|
| hsa-mir-449 | MSMB     | -0.62 |
| hsa-mir-449 | MSX2     | -0.43 |
| hsa-mir-449 | MTMR8    | -0.62 |
| hsa-mir-449 | MUC15    | -0.34 |
| hsa-mir-449 | MUC16    | -0.57 |
| hsa-mir-449 | MYCT1    | 0.41  |
| hsa-mir-449 | MYEOV    | -0.53 |
| hsa-mir-449 | MYH2     | -0.5  |
| hsa-mir-449 | MYL1     | -0.47 |
| hsa-mir-449 | MYL7     | -0.62 |
| hsa-mir-449 | MYLC2PL  | -0.5  |
| hsa-mir-449 | MYO1A    | -0.42 |
| hsa-mir-449 | MYPN     | -0.47 |
| hsa-mir-449 | NANOGP1  | -0.49 |
| hsa-mir-449 | NAT8     | -0.58 |
| hsa-mir-449 | NDST4    | -0.3  |
| hsa-mir-449 | NFASC    | 0.39  |
| hsa-mir-449 | NLRP7    | -0.5  |
| hsa-mir-449 | NOTUM    | -0.41 |
| hsa-mir-449 | NOX3     | 0.44  |
| hsa-mir-449 | NOX5     | -0.56 |
| hsa-mir-449 | NPFFR2   | -0.51 |
| hsa-mir-449 | NPM3     | -0.33 |
| hsa-mir-449 | NR0B2    | -0.53 |
| hsa-mir-449 | NR1H4    | -0.27 |
| hsa-mir-449 | NRG4     | -0.64 |
| hsa-mir-449 | NRTN     | -0.13 |
| hsa-mir-449 | NS3BP    | -0.37 |
| hsa-mir-449 | NTF3     | -0.38 |
| hsa-mir-449 | NTRK2    | 0.29  |
| hsa-mir-449 | NUP210L  | -0.46 |
| hsa-mir-449 | ODAM     | -0.54 |
| hsa-mir-449 | OR1D2    | -0.72 |
| hsa-mir-449 | OR2T2    | 0.52  |
| hsa-mir-449 | OR51B5   | -0.61 |
| hsa-mir-449 | OR51E1   | 0.49  |
| hsa-mir-449 | OR51I1   | -0.56 |
| hsa-mir-449 | OSTalpha | -0.47 |
| hsa-mir-449 | OTX2     | -0.63 |
| hsa-mir-449 | OVOL2    | -0.11 |
| hsa-mir-449 | P2RY10   | -0.36 |
| hsa-mir-449 | PADI2    | 0.23  |
| hsa-mir-449 | PAEP     | -0.41 |
| hsa-mir-449 | PAGE1    | -0.53 |
| hsa-mir-449 | PAGE2    | -0.3  |
| hsa-mir-449 | PAGE5    | -0.1  |
| hsa-mir-449 | PAPPA    | -0.42 |
| hsa-mir-449 | PASD1    | -0.36 |
| hsa-mir-449 | PAX9     | -0.44 |
| hsa-mir-449 | PCK1     | -0.34 |
| hsa-mir-449 | PCSK9    | -0.45 |
| hsa-mir-449 | PDILT    | -0.57 |
| hsa-mir-449 | PIAS4    | -0.52 |

|             |             |       |
|-------------|-------------|-------|
| hsa-mir-449 | PITPNM1     | -0.44 |
| hsa-mir-449 | PIWIL2      | -0.58 |
| hsa-mir-449 | PKLR        | -0.54 |
| hsa-mir-449 | PKP2        | -0.29 |
| hsa-mir-449 | PLA1A       | -0.45 |
| hsa-mir-449 | PLA2G12B    | -0.48 |
| hsa-mir-449 | PLA2G3      | -0.36 |
| hsa-mir-449 | PLAC1       | -0.34 |
| hsa-mir-449 | PLEKHN1     | -0.45 |
| hsa-mir-449 | PLXDC1      | 0.43  |
| hsa-mir-449 | PNLIPRP2    | -0.53 |
| hsa-mir-449 | POTE15      | -0.48 |
| hsa-mir-449 | POU5F1P3    | -0.49 |
| hsa-mir-449 | POU5F1P4    | -0.39 |
| hsa-mir-449 | PRAMEF8     | -0.51 |
| hsa-mir-449 | PRAP1       | -0.58 |
| hsa-mir-449 | PRDM7       | -0.59 |
| hsa-mir-449 | PRDM9       | -0.63 |
| hsa-mir-449 | PRELP       | 0.36  |
| hsa-mir-449 | PROC        | -0.43 |
| hsa-mir-449 | PRODH2      | -0.56 |
| hsa-mir-449 | PRSS1       | -0.64 |
| hsa-mir-449 | PRSS2       | -0.61 |
| hsa-mir-449 | PRSS21      | -0.48 |
| hsa-mir-449 | PRSS3       | -0.51 |
| hsa-mir-449 | PRSS7       | -0.47 |
| hsa-mir-449 | PSG6        | -0.57 |
| hsa-mir-449 | PTGFR       | -0.43 |
| hsa-mir-449 | PTPRU       | -0.4  |
| hsa-mir-449 | RAB25       | -0.45 |
| hsa-mir-449 | RAET1E      | -0.61 |
| hsa-mir-449 | RASGRP3     | 0.38  |
| hsa-mir-449 | RBM35B      | -0.44 |
| hsa-mir-449 | RFTN2       | 0.42  |
| hsa-mir-449 | RFX4        | 0.31  |
| hsa-mir-449 | RHAG        | -0.43 |
| hsa-mir-449 | RHD         | -0.5  |
| hsa-mir-449 | RHEBL1      | -0.44 |
| hsa-mir-449 | RHOV        | -0.53 |
| hsa-mir-449 | RNF152      | 0.41  |
| hsa-mir-449 | RNF183      | -0.55 |
| hsa-mir-449 | RNF212      | -0.48 |
| hsa-mir-449 | ROS1        | -0.34 |
| hsa-mir-449 | RP13-36C9.6 | -0.41 |
| hsa-mir-449 | RPS6KA6     | -0.09 |
| hsa-mir-449 | RSBN1       | 0.39  |
| hsa-mir-449 | RTP3        | -0.35 |
| hsa-mir-449 | S100A14     | -0.46 |
| hsa-mir-449 | S100A2      | 0.6   |
| hsa-mir-449 | SAGE1       | -0.48 |
| hsa-mir-449 | SEC14L4     | -0.56 |
| hsa-mir-449 | SEMA3G      | -0.62 |
| hsa-mir-449 | SERPINA10   | -0.48 |

|             |           |       |
|-------------|-----------|-------|
| hsa-mir-449 | SERPINA11 | -0.61 |
| hsa-mir-449 | SERPINA4  | -0.61 |
| hsa-mir-449 | SERPINA6  | -0.54 |
| hsa-mir-449 | SERPINA7  | -0.53 |
| hsa-mir-449 | SERPINB2  | -0.51 |
| hsa-mir-449 | SERPINB3  | -0.61 |
| hsa-mir-449 | SERPINB4  | -0.61 |
| hsa-mir-449 | SERPINB5  | -0.58 |
| hsa-mir-449 | SEZ6      | 0.42  |
| hsa-mir-449 | SFTPA1    | -0.45 |
| hsa-mir-449 | SH2D3A    | -0.51 |
| hsa-mir-449 | SH3RF2    | -0.46 |
| hsa-mir-449 | SKP2      | -0.27 |
| hsa-mir-449 | SLC12A3   | -0.61 |
| hsa-mir-449 | SLC17A2   | -0.63 |
| hsa-mir-449 | SLC18A1   | -0.38 |
| hsa-mir-449 | SLC1A6    | -0.4  |
| hsa-mir-449 | SLC23A1   | -0.56 |
| hsa-mir-449 | SLC25A21  | -0.48 |
| hsa-mir-449 | SLC2A2    | -0.54 |
| hsa-mir-449 | SLC30A8   | -0.49 |
| hsa-mir-449 | SLC39A5   | -0.54 |
| hsa-mir-449 | SLC44A4   | -0.58 |
| hsa-mir-449 | SLC45A2   | -0.65 |
| hsa-mir-449 | SLC6A4    | -0.58 |
| hsa-mir-449 | SLCO1B1   | -0.39 |
| hsa-mir-449 | SLCO1B3   | -0.42 |
| hsa-mir-449 | SMC1B     | -0.11 |
| hsa-mir-449 | SMCR5     | -0.51 |
| hsa-mir-449 | SMPDL3B   | -0.56 |
| hsa-mir-449 | SOAT2     | -0.47 |
| hsa-mir-449 | SPANXC    | -0.45 |
| hsa-mir-449 | SPANXD    | -0.39 |
| hsa-mir-449 | SPATA4    | 0.31  |
| hsa-mir-449 | SPINK4    | -0.54 |
| hsa-mir-449 | SPINK5    | -0.55 |
| hsa-mir-449 | SPINK5L3  | -0.36 |
| hsa-mir-449 | SPRR1B    | -0.69 |
| hsa-mir-449 | SPRR2D    | -0.51 |
| hsa-mir-449 | SPRR3     | -0.53 |
| hsa-mir-449 | SPTA1     | -0.29 |
| hsa-mir-449 | SSX1      | -0.59 |
| hsa-mir-449 | SSX7      | -0.5  |
| hsa-mir-449 | STGC3     | -0.53 |
| hsa-mir-449 | STOML2    | -0.3  |
| hsa-mir-449 | SUHW1     | -0.44 |
| hsa-mir-449 | SULT1C4   | 0.61  |
| hsa-mir-449 | SULT2A1   | -0.58 |
| hsa-mir-449 | SYNGR3    | -0.46 |
| hsa-mir-449 | SYTL1     | -0.22 |
| hsa-mir-449 | TBX10     | -0.58 |
| hsa-mir-449 | TDGF1     | -0.44 |
| hsa-mir-449 | TERT      | -0.49 |

|             |           |       |
|-------------|-----------|-------|
| hsa-mir-449 | THSD3     | -0.44 |
| hsa-mir-449 | TJP3      | -0.53 |
| hsa-mir-449 | TM4SF5    | -0.43 |
| hsa-mir-449 | TMED6     | -0.51 |
| hsa-mir-449 | TMEM16J   | -0.55 |
| hsa-mir-449 | TMEM190   | -0.19 |
| hsa-mir-449 | TMEM44    | -0.23 |
| hsa-mir-449 | TMEM61    | -0.39 |
| hsa-mir-449 | TMEM63A   | -0.52 |
| hsa-mir-449 | TMEM83    | -0.51 |
| hsa-mir-449 | TMEM92    | -0.42 |
| hsa-mir-449 | TMOD2     | 0.48  |
| hsa-mir-449 | TMPRSS11F | -0.09 |
| hsa-mir-449 | TMPRSS4   | -0.55 |
| hsa-mir-449 | TNFRSF18  | -0.43 |
| hsa-mir-449 | TNFRSF4   | 0.4   |
| hsa-mir-449 | TNNC1     | -0.5  |
| hsa-mir-449 | TNNI2     | -0.37 |
| hsa-mir-449 | TP53TG3   | -0.4  |
| hsa-mir-449 | TPO       | -0.43 |
| hsa-mir-449 | TPTE      | -0.43 |
| hsa-mir-449 | TRIM15    | -0.5  |
| hsa-mir-449 | TRIM49    | -0.45 |
| hsa-mir-449 | TRPA1     | -0.43 |
| hsa-mir-449 | TRPM1     | -0.66 |
| hsa-mir-449 | TSGA10    | 0.43  |
| hsa-mir-449 | TSPAN18   | -0.16 |
| hsa-mir-449 | TSPY2     | -0.57 |
| hsa-mir-449 | TTC30A    | 0.26  |
| hsa-mir-449 | TTR       | -0.22 |
| hsa-mir-449 | TUBAL3    | -0.53 |
| hsa-mir-449 | TYR       | -0.46 |
| hsa-mir-449 | TYRP1     | -0.41 |
| hsa-mir-449 | UGT1A6    | -0.48 |
| hsa-mir-449 | UGT2B10   | -0.46 |
| hsa-mir-449 | UGT2B11   | -0.5  |
| hsa-mir-449 | UGT2B15   | -0.4  |
| hsa-mir-449 | UGT2B17   | -0.28 |
| hsa-mir-449 | UGT2B28   | -0.64 |
| hsa-mir-449 | UGT2B4    | -0.58 |
| hsa-mir-449 | UGT2B7    | -0.35 |
| hsa-mir-449 | UMODL1    | -0.39 |
| hsa-mir-449 | UNC93A    | -0.62 |
| hsa-mir-449 | USP44     | -0.36 |
| hsa-mir-449 | UTS2      | -0.41 |
| hsa-mir-449 | VIL1      | -0.59 |
| hsa-mir-449 | WASL      | 0.4   |
| hsa-mir-449 | WIT1      | -0.36 |
| hsa-mir-449 | XKR3      | -0.5  |
| hsa-mir-449 | YIPF3     | 0.29  |
| hsa-mir-449 | YIPF7     | 0.58  |
| hsa-mir-449 | ZC3H12C   | 0.42  |
| hsa-mir-449 | ZFP2      | 0.23  |

|             |           |       |
|-------------|-----------|-------|
| hsa-mir-449 | ZFP42     | -0.54 |
| hsa-mir-449 | ZG16      | -0.54 |
| hsa-mir-449 | ZIC3      | -0.44 |
| hsa-mir-449 | ZMYND12   | 0.36  |
| hsa-mir-449 | ZNF366    | 0.5   |
| hsa-mir-449 | ZNF396    | 0.45  |
| hsa-mir-449 | ZNF501    | 0.4   |
| hsa-mir-449 | ZNF599    | 0.45  |
| hsa-mir-449 | ZNF615    | 0.35  |
| hsa-mir-449 | ZNF750    | -0.33 |
| hsa-mir-451 | AGXT2L1   | -0.08 |
| hsa-mir-451 | ALOX5AP   | 0.26  |
| hsa-mir-451 | AMICA1    | 0.22  |
| hsa-mir-451 | ANKRD22   | 0.18  |
| hsa-mir-451 | APOBEC3A  | 0.28  |
| hsa-mir-451 | APOC2     | 0.11  |
| hsa-mir-451 | ARMC4     | -0.01 |
| hsa-mir-451 | ATP10D    | 0.17  |
| hsa-mir-451 | ATP8B3    | -0.07 |
| hsa-mir-451 | C11orf70  | 0.08  |
| hsa-mir-451 | C14orf101 | 0.16  |
| hsa-mir-451 | C1QTNF3   | -0.01 |
| hsa-mir-451 | C20orf196 | 0.06  |
| hsa-mir-451 | CAPN9     | -0.25 |
| hsa-mir-451 | CCDC102B  | 0.24  |
| hsa-mir-451 | CCL20     | 0.1   |
| hsa-mir-451 | CCL23     | 0.1   |
| hsa-mir-451 | CD2       | 0.18  |
| hsa-mir-451 | CD48      | 0.18  |
| hsa-mir-451 | CD68      | 0.15  |
| hsa-mir-451 | CDKN2A    | -0.06 |
| hsa-mir-451 | CHRNA9    | 0.07  |
| hsa-mir-451 | CLEC2B    | 0.16  |
| hsa-mir-451 | CNDP1     | 0.01  |
| hsa-mir-451 | COL1A1    | 0.17  |
| hsa-mir-451 | CPM       | 0.14  |
| hsa-mir-451 | CST7      | 0.31  |
| hsa-mir-451 | CXCL6     | 0.19  |
| hsa-mir-451 | CYP3A5    | -0.12 |
| hsa-mir-451 | CYP4B1    | -0.17 |
| hsa-mir-451 | DEFA3     | 0.32  |
| hsa-mir-451 | EMB       | 0.2   |
| hsa-mir-451 | EMR3      | 0.33  |
| hsa-mir-451 | F5        | -0.05 |
| hsa-mir-451 | FA2H      | -0.09 |
| hsa-mir-451 | FABP5     | 0.13  |
| hsa-mir-451 | FCER1A    | 0.2   |
| hsa-mir-451 | FGFBP2    | 0.13  |
| hsa-mir-451 | FLJ45557  | 0.14  |
| hsa-mir-451 | FLT1      | 0.32  |
| hsa-mir-451 | GLIS1     | -0.23 |
| hsa-mir-451 | GLYATL1   | -0.19 |
| hsa-mir-451 | GPNMB     | 0.08  |



|             |              |       |
|-------------|--------------|-------|
| hsa-mir-451 | GPR65        | 0.22  |
| hsa-mir-451 | H1F0         | -0.14 |
| hsa-mir-451 | HAMP         | 0.19  |
| hsa-mir-451 | HBA2         | 0.6   |
| hsa-mir-451 | HBB          | 0.44  |
| hsa-mir-451 | HBD          | 0.46  |
| hsa-mir-451 | HBM          | 0.4   |
| hsa-mir-451 | HBQ1         | 0.41  |
| hsa-mir-451 | IL18RAP      | 0.37  |
| hsa-mir-451 | IL1R2        | 0.21  |
| hsa-mir-451 | IL8          | 0.23  |
| hsa-mir-451 | IL8RB        | 0.41  |
| hsa-mir-451 | IRF8         | 0.17  |
| hsa-mir-451 | IRX2         | -0.16 |
| hsa-mir-451 | ITGA8        | 0.25  |
| hsa-mir-451 | KLRD1        | 0.03  |
| hsa-mir-451 | KREMEN2      | -0.19 |
| hsa-mir-451 | LAIR1        | 0.21  |
| hsa-mir-451 | LUZP2        | -0.05 |
| hsa-mir-451 | LYZ          | 0.2   |
| hsa-mir-451 | MS4A4A       | 0.16  |
| hsa-mir-451 | MS4A6A       | 0.2   |
| hsa-mir-451 | NAT2         | 0.16  |
| hsa-mir-451 | NOS2A        | 0.09  |
| hsa-mir-451 | OGN          | 0     |
| hsa-mir-451 | P2RY12       | 0.14  |
| hsa-mir-451 | PAMCI        | -0.07 |
| hsa-mir-451 | PCDHB15      | 0.02  |
| hsa-mir-451 | PCDHGB7      | 0.04  |
| hsa-mir-451 | PDGFA        | 0.12  |
| hsa-mir-451 | PF4          | 0.51  |
| hsa-mir-451 | PF4V1        | 0.41  |
| hsa-mir-451 | PITX2        | -0.05 |
| hsa-mir-451 | PLAC8        | 0.04  |
| hsa-mir-451 | POSTN        | 0.13  |
| hsa-mir-451 | PPBP         | 0.42  |
| hsa-mir-451 | PRDM13       | 0     |
| hsa-mir-451 | PROK2        | 0.3   |
| hsa-mir-451 | REG1A        | 0.13  |
| hsa-mir-451 | RP13-102H20. | -0.07 |
| hsa-mir-451 | RPE65        | 0.1   |
| hsa-mir-451 | RPESP        | -0.07 |
| hsa-mir-451 | S100A12      | 0.42  |
| hsa-mir-451 | S100A8       | 0.32  |
| hsa-mir-451 | S100A9       | 0.32  |
| hsa-mir-451 | SEC61G       | 0.21  |
| hsa-mir-451 | SIGLEC10     | 0.19  |
| hsa-mir-451 | SLCO2B1      | 0.14  |
| hsa-mir-451 | SP8          | 0.05  |
| hsa-mir-451 | SRGN         | 0.26  |
| hsa-mir-451 | SUSD5        | -0.14 |
| hsa-mir-451 | TAC3         | -0.14 |
| hsa-mir-451 | TFEC         | 0.2   |

|             |           |       |
|-------------|-----------|-------|
| hsa-mir-451 | THBD      | 0.3   |
| hsa-mir-451 | TM4SF18   | 0.3   |
| hsa-mir-451 | TMEM125   | -0.1  |
| hsa-mir-451 | UBE2NL    | -0.04 |
| hsa-mir-451 | UNC5B     | 0.12  |
| hsa-mir-451 | VIT       | -0.17 |
| hsa-mir-451 | WTAP      | 0.18  |
| hsa-mir-451 | XRCC6BP1  | -0.08 |
| hsa-mir-451 | ZEB1      | 0.13  |
| hsa-mir-451 | ZMYND10   | -0.02 |
| hsa-mir-451 | ZNF124    | 0.22  |
| hsa-mir-452 | ACSM1     | 0.22  |
| hsa-mir-452 | ALX1      | 0.29  |
| hsa-mir-452 | ASGR2     | 0.3   |
| hsa-mir-452 | BIK       | 0.24  |
| hsa-mir-452 | C9orf47   | 0.5   |
| hsa-mir-452 | CADM2     | -0.33 |
| hsa-mir-452 | CARD11    | 0.3   |
| hsa-mir-452 | CCR2      | 0.4   |
| hsa-mir-452 | CD3D      | 0.37  |
| hsa-mir-452 | CD3G      | 0.37  |
| hsa-mir-452 | CD52      | 0.3   |
| hsa-mir-452 | CD70      | 0.25  |
| hsa-mir-452 | CD86      | 0.5   |
| hsa-mir-452 | CGB1      | 0.43  |
| hsa-mir-452 | CLEC4D    | 0.35  |
| hsa-mir-452 | COL15A1   | 0.33  |
| hsa-mir-452 | DERL3     | 0.35  |
| hsa-mir-452 | DPY19L2P1 | -0.24 |
| hsa-mir-452 | DPY19L2P3 | -0.26 |
| hsa-mir-452 | FLJ38723  | 0.42  |
| hsa-mir-452 | GNA15     | 0.31  |
| hsa-mir-452 | GRIA4     | -0.32 |
| hsa-mir-452 | GYPC      | 0.32  |
| hsa-mir-452 | HBG2      | 0.25  |
| hsa-mir-452 | HLX       | 0.32  |
| hsa-mir-452 | HSPA1L    | -0.2  |
| hsa-mir-452 | IGLV2-14  | 0.28  |
| hsa-mir-452 | KIAA1822L | 0.25  |
| hsa-mir-452 | KYNU      | 0.33  |
| hsa-mir-452 | LCK       | 0.37  |
| hsa-mir-452 | LRP1B     | -0.33 |
| hsa-mir-452 | LTBR      | 0.26  |
| hsa-mir-452 | LUM       | 0.37  |
| hsa-mir-452 | MAGEC2    | 0.05  |
| hsa-mir-452 | PCSK4     | 0.43  |
| hsa-mir-452 | PHLDA2    | 0.26  |
| hsa-mir-452 | PLEKHN1   | 0.27  |
| hsa-mir-452 | PPM1F     | 0.44  |
| hsa-mir-452 | PPP1CA    | 0.3   |
| hsa-mir-452 | PTGER2    | 0.35  |
| hsa-mir-452 | RFTN2     | -0.29 |
| hsa-mir-452 | RGS19     | 0.3   |

|                |           |       |
|----------------|-----------|-------|
| hsa-mir-452    | SAPS1     | 0.53  |
| hsa-mir-452    | SERPINA1  | 0.37  |
| hsa-mir-452    | SIT1      | 0.33  |
| hsa-mir-452    | SKAP1     | 0.35  |
| hsa-mir-452    | SLC6A4    | 0.18  |
| hsa-mir-452    | TES       | 0.38  |
| hsa-mir-452    | TGM5      | 0.17  |
| hsa-mir-452    | TNFSF11   | 0.37  |
| hsa-mir-452    | TRAT1     | 0.34  |
| hsa-mir-452    | TSPY2     | 0.13  |
| hsa-mir-452    | UGT2B17   | 0.1   |
| hsa-mir-452    | VPS18     | 0.5   |
| hsa-mir-454-3p | ARHGAP6   | -0.35 |
| hsa-mir-454-3p | C6orf167  | 0.36  |
| hsa-mir-454-3p | CCNB2     | 0.38  |
| hsa-mir-454-3p | CCNE2     | 0.31  |
| hsa-mir-454-3p | DTL       | 0.41  |
| hsa-mir-454-3p | EGF       | -0.21 |
| hsa-mir-454-3p | FAM27E1   | 0.35  |
| hsa-mir-454-3p | GPR137C   | 0.33  |
| hsa-mir-454-3p | KIAA1712  | 0.44  |
| hsa-mir-454-3p | KIF15     | 0.44  |
| hsa-mir-454-3p | LOC388272 | 0.35  |
| hsa-mir-454-3p | METRN     | 0.28  |
| hsa-mir-454-3p | OPLAH     | -0.3  |
| hsa-mir-454-3p | PLEKHK1   | 0.43  |
| hsa-mir-454-3p | PLEKHQ1   | -0.4  |
| hsa-mir-454-3p | PLK4      | 0.39  |
| hsa-mir-454-3p | RAD51AP1  | 0.38  |
| hsa-mir-454-3p | RFC4      | 0.38  |
| hsa-mir-454-3p | SELPLG    | -0.37 |
| hsa-mir-454-3p | SLA       | -0.42 |
| hsa-mir-454-3p | SMC2      | 0.36  |
| hsa-mir-454-3p | TAF5      | 0.19  |
| hsa-mir-454-3p | TOX3      | 0.34  |
| hsa-mir-454-3p | ZDHHC13   | 0.14  |
| hsa-mir-454-3p | ZNF711    | 0.41  |
| hsa-mir-454-3p | ZNF85     | 0.33  |
| hsa-mir-483    | BIN2      | -0.04 |
| hsa-mir-483    | CXCL10    | -0.06 |
| hsa-mir-483    | NOX3      | 0.13  |
| hsa-mir-483    | PCDH10    | -0.02 |
| hsa-mir-483    | TFAP2D    | -0.05 |
| hsa-mir-484    | ABCG5     | -0.36 |
| hsa-mir-484    | ALB       | -0.4  |
| hsa-mir-484    | ALX1      | -0.21 |
| hsa-mir-484    | AMHR2     | -0.42 |
| hsa-mir-484    | APOF      | -0.28 |
| hsa-mir-484    | APOH      | -0.37 |
| hsa-mir-484    | ATAD4     | -0.38 |
| hsa-mir-484    | BAIAP2L1  | -0.41 |
| hsa-mir-484    | C21orf125 | -0.41 |
| hsa-mir-484    | CALML5    | -0.35 |

|             |          |       |
|-------------|----------|-------|
| hsa-mir-484 | CAPN6    | -0.42 |
| hsa-mir-484 | CAPN9    | -0.37 |
| hsa-mir-484 | CDH16    | -0.38 |
| hsa-mir-484 | CEACAM5  | -0.38 |
| hsa-mir-484 | CEACAM6  | -0.32 |
| hsa-mir-484 | CEP170L  | 0.32  |
| hsa-mir-484 | CREB3L3  | -0.39 |
| hsa-mir-484 | CRYBA1   | -0.26 |
| hsa-mir-484 | CTCFL    | -0.31 |
| hsa-mir-484 | DNAH8    | -0.33 |
| hsa-mir-484 | DNMT3L   | -0.37 |
| hsa-mir-484 | FAM83A   | -0.39 |
| hsa-mir-484 | FBXL21   | -0.41 |
| hsa-mir-484 | FGA      | -0.38 |
| hsa-mir-484 | FGB      | -0.37 |
| hsa-mir-484 | FGG      | -0.39 |
| hsa-mir-484 | FLJ46111 | -0.41 |
| hsa-mir-484 | FOXA1    | -0.2  |
| hsa-mir-484 | G6PC     | -0.38 |
| hsa-mir-484 | IGF2BP1  | -0.35 |
| hsa-mir-484 | IGLV2-14 | -0.37 |
| hsa-mir-484 | KLF1     | -0.39 |
| hsa-mir-484 | KRT6A    | -0.38 |
| hsa-mir-484 | LBX2     | -0.31 |
| hsa-mir-484 | LCT      | -0.33 |
| hsa-mir-484 | MAGEA5   | -0.42 |
| hsa-mir-484 | MAGEA9   | -0.37 |
| hsa-mir-484 | MAGEC1   | -0.34 |
| hsa-mir-484 | MAGEC2   | -0.25 |
| hsa-mir-484 | MLANA    | -0.32 |
| hsa-mir-484 | MS4A3    | -0.4  |
| hsa-mir-484 | MUC16    | -0.4  |
| hsa-mir-484 | MYLC2PL  | -0.43 |
| hsa-mir-484 | MYPN     | -0.34 |
| hsa-mir-484 | NNT      | 0.33  |
| hsa-mir-484 | NRG4     | -0.45 |
| hsa-mir-484 | ODAM     | -0.31 |
| hsa-mir-484 | OR51B5   | -0.4  |
| hsa-mir-484 | OTX2     | -0.44 |
| hsa-mir-484 | PAGE5    | -0.09 |
| hsa-mir-484 | PCSK9    | -0.39 |
| hsa-mir-484 | PIWIL2   | -0.41 |
| hsa-mir-484 | PKLR     | -0.39 |
| hsa-mir-484 | PNLIPRP2 | -0.36 |
| hsa-mir-484 | POTE15   | -0.28 |
| hsa-mir-484 | POU5F1P3 | -0.35 |
| hsa-mir-484 | PRDM7    | -0.41 |
| hsa-mir-484 | PRDM9    | -0.42 |
| hsa-mir-484 | PRSS1    | -0.42 |
| hsa-mir-484 | RNF183   | -0.37 |
| hsa-mir-484 | RNF212   | -0.33 |
| hsa-mir-484 | SERPINA4 | -0.4  |
| hsa-mir-484 | SERPINB5 | -0.36 |

|                |          |       |
|----------------|----------|-------|
| hsa-mir-484    | SLC44A4  | -0.41 |
| hsa-mir-484    | SLC45A2  | -0.42 |
| hsa-mir-484    | SLC7A3   | -0.24 |
| hsa-mir-484    | SPANXC   | -0.3  |
| hsa-mir-484    | SPINK5   | -0.42 |
| hsa-mir-484    | SPRR1B   | -0.43 |
| hsa-mir-484    | SSX7     | -0.35 |
| hsa-mir-484    | TNNC1    | -0.39 |
| hsa-mir-484    | TRIM15   | -0.28 |
| hsa-mir-484    | TRIM49   | -0.32 |
| hsa-mir-484    | TRPM1    | -0.41 |
| hsa-mir-484    | UGT2B28  | -0.43 |
| hsa-mir-484    | UGT2B4   | -0.31 |
| hsa-mir-484    | UNC93A   | -0.42 |
| hsa-mir-484    | USP44    | -0.24 |
| hsa-mir-484    | WNK4     | -0.22 |
| hsa-mir-485-3p | B3GNT4   | 0.31  |
| hsa-mir-485-3p | C21orf62 | -0.3  |
| hsa-mir-485-3p | CREG2    | 0.25  |
| hsa-mir-485-3p | DBH      | 0.16  |
| hsa-mir-485-3p | ELA3A    | 0.12  |
| hsa-mir-485-3p | FAM73A   | 0.16  |
| hsa-mir-485-3p | FLJ34047 | 0.32  |
| hsa-mir-485-3p | HOXB13   | -0.02 |
| hsa-mir-485-3p | HTR2C    | 0.28  |
| hsa-mir-485-3p | KCNG3    | 0.32  |
| hsa-mir-485-3p | KIAA1086 | 0.36  |
| hsa-mir-485-3p | LONRF2   | 0.06  |
| hsa-mir-485-3p | MGC5566  | 0.23  |
| hsa-mir-485-3p | MUM1L1   | 0.25  |
| hsa-mir-485-3p | NAP1L2   | 0.15  |
| hsa-mir-485-3p | OVOL2    | 0.22  |
| hsa-mir-485-3p | PLAC2    | 0.29  |
| hsa-mir-485-3p | PPM2C    | 0.1   |
| hsa-mir-485-3p | PPP2R2C  | 0.28  |
| hsa-mir-485-3p | PRSS16   | 0.15  |
| hsa-mir-485-3p | PRSS2    | 0.31  |
| hsa-mir-485-3p | PRSS3    | 0.33  |
| hsa-mir-485-3p | PVALB    | 0.24  |
| hsa-mir-485-3p | SHANK2   | 0.31  |
| hsa-mir-485-3p | SNCA     | 0.22  |
| hsa-mir-485-3p | SYT13    | 0.23  |
| hsa-mir-485-3p | TCERG1L  | 0.3   |
| hsa-mir-485-3p | TYRP1    | 0.25  |
| hsa-mir-486    | BMP5     | -0.06 |
| hsa-mir-486    | C3orf32  | -0.3  |
| hsa-mir-486    | CAMP     | 0.29  |
| hsa-mir-486    | CCDC102B | 0.32  |
| hsa-mir-486    | COL3A1   | 0.29  |
| hsa-mir-486    | CRYBA1   | -0.14 |
| hsa-mir-486    | DEFA3    | 0.41  |
| hsa-mir-486    | ESAM     | 0.31  |
| hsa-mir-486    | FPRL1    | 0.38  |

|              |          |       |
|--------------|----------|-------|
| hsa-mir-486  | GJA4     | 0.4   |
| hsa-mir-486  | HBA2     | 0.53  |
| hsa-mir-486  | HBB      | 0.42  |
| hsa-mir-486  | HBD      | 0.4   |
| hsa-mir-486  | HBM      | 0.51  |
| hsa-mir-486  | HBQ1     | 0.36  |
| hsa-mir-486  | IL18RAP  | 0.47  |
| hsa-mir-486  | IL8RB    | 0.47  |
| hsa-mir-486  | KCNJ15   | 0.32  |
| hsa-mir-486  | KLK8     | -0.25 |
| hsa-mir-486  | KRT1     | 0.33  |
| hsa-mir-486  | MAT1A    | -0.2  |
| hsa-mir-486  | OR51E1   | 0.36  |
| hsa-mir-486  | OSM      | 0.4   |
| hsa-mir-486  | PF4      | 0.6   |
| hsa-mir-486  | PF4V1    | 0.49  |
| hsa-mir-486  | PGDS     | 0.28  |
| hsa-mir-486  | POSTN    | 0.21  |
| hsa-mir-486  | PPBP     | 0.53  |
| hsa-mir-486  | PXDNL    | 0.33  |
| hsa-mir-486  | S100A12  | 0.49  |
| hsa-mir-486  | S100A9   | 0.35  |
| hsa-mir-486  | TMEM30A  | 0.3   |
| hsa-mir-486  | TRIM49   | -0.18 |
| hsa-mir-486  | TRPC6    | 0.32  |
| hsa-mir-487a | MAL2     | 0.22  |
| hsa-mir-487a | NPTN     | 0.31  |
| hsa-mir-487a | RPA4     | -0.33 |
| hsa-mir-487b | C8orf47  | 0.36  |
| hsa-mir-487b | CCK      | 0.2   |
| hsa-mir-487b | ELMOD1   | 0.26  |
| hsa-mir-487b | LGI1     | 0.2   |
| hsa-mir-487b | MAL      | 0.25  |
| hsa-mir-487b | VSNL1    | 0.29  |
| hsa-mir-487b | ZMAT4    | 0.28  |
| hsa-mir-491  | ACVR1C   | 0.61  |
| hsa-mir-491  | ADAM11   | 0.62  |
| hsa-mir-491  | AFAP1L1  | -0.48 |
| hsa-mir-491  | ANGPT2   | -0.46 |
| hsa-mir-491  | ANKRD34  | 0.58  |
| hsa-mir-491  | AP3M2    | 0.41  |
| hsa-mir-491  | ARPP-21  | 0.48  |
| hsa-mir-491  | ATP1B1   | 0.52  |
| hsa-mir-491  | ATP6V1A  | 0.52  |
| hsa-mir-491  | ATP6V1B2 | 0.55  |
| hsa-mir-491  | ATP6V1G2 | 0.43  |
| hsa-mir-491  | ATP6V1H  | 0.56  |
| hsa-mir-491  | ATP8A2   | 0.52  |
| hsa-mir-491  | BARD1    | -0.43 |
| hsa-mir-491  | BEGAIN   | 0.33  |
| hsa-mir-491  | C10orf35 | 0.5   |
| hsa-mir-491  | C13orf16 | 0.53  |
| hsa-mir-491  | C1orf115 | 0.57  |

|             |           |       |
|-------------|-----------|-------|
| hsa-mir-491 | C1orf128  | 0.52  |
| hsa-mir-491 | C1orf216  | 0.57  |
| hsa-mir-491 | C1orf96   | 0.35  |
| hsa-mir-491 | C1QL3     | 0.63  |
| hsa-mir-491 | CACNA2D3  | 0.51  |
| hsa-mir-491 | CACNB1    | 0.58  |
| hsa-mir-491 | CAMKV     | 0.5   |
| hsa-mir-491 | CAP2      | 0.51  |
| hsa-mir-491 | CBFA2T3   | 0.47  |
| hsa-mir-491 | CDC37L1   | 0.4   |
| hsa-mir-491 | CDH12     | 0.68  |
| hsa-mir-491 | CDH18     | 0.56  |
| hsa-mir-491 | CDH9      | 0.66  |
| hsa-mir-491 | CDKN2D    | 0.53  |
| hsa-mir-491 | CHGB      | 0.39  |
| hsa-mir-491 | CISD1     | 0.55  |
| hsa-mir-491 | CKMT1A    | 0.5   |
| hsa-mir-491 | CPEB1     | 0.43  |
| hsa-mir-491 | CPEB3     | 0.61  |
| hsa-mir-491 | CYFIP2    | 0.45  |
| hsa-mir-491 | CYP26B1   | 0.42  |
| hsa-mir-491 | CYP4X1    | 0.61  |
| hsa-mir-491 | DDN       | 0.7   |
| hsa-mir-491 | DNAJA4    | 0.34  |
| hsa-mir-491 | DNAJC12   | 0.49  |
| hsa-mir-491 | DOK6      | 0.47  |
| hsa-mir-491 | DPYSL3    | -0.43 |
| hsa-mir-491 | DRD1      | 0.64  |
| hsa-mir-491 | DTYMK     | -0.45 |
| hsa-mir-491 | DYNC111   | 0.54  |
| hsa-mir-491 | EIF4A2    | 0.45  |
| hsa-mir-491 | ENC1      | 0.43  |
| hsa-mir-491 | EPB49     | 0.59  |
| hsa-mir-491 | F2R       | -0.53 |
| hsa-mir-491 | FABP3     | 0.42  |
| hsa-mir-491 | FAM79A    | 0.61  |
| hsa-mir-491 | FAM81A    | 0.53  |
| hsa-mir-491 | FBXL15    | 0.59  |
| hsa-mir-491 | FBXL16    | 0.5   |
| hsa-mir-491 | FBXO40    | 0.62  |
| hsa-mir-491 | FBXO41    | 0.51  |
| hsa-mir-491 | FBXW7     | 0.54  |
| hsa-mir-491 | FGF13     | 0.56  |
| hsa-mir-491 | FKBP1B    | 0.32  |
| hsa-mir-491 | FREQ      | 0.56  |
| hsa-mir-491 | FSTL5     | 0.55  |
| hsa-mir-491 | GABARAPL3 | 0.6   |
| hsa-mir-491 | GABRA5    | 0.58  |
| hsa-mir-491 | GABRG2    | 0.54  |
| hsa-mir-491 | GALNTL5   | 0.53  |
| hsa-mir-491 | GARNL3    | 0.51  |
| hsa-mir-491 | GAST      | 0.55  |
| hsa-mir-491 | GLS       | 0.51  |

|             |           |       |
|-------------|-----------|-------|
| hsa-mir-491 | GLS2      | 0.61  |
| hsa-mir-491 | GOT1      | 0.65  |
| hsa-mir-491 | GPRASP2   | 0.4   |
| hsa-mir-491 | GREM2     | 0.64  |
| hsa-mir-491 | HS6ST3    | 0.58  |
| hsa-mir-491 | HTR2C     | 0.67  |
| hsa-mir-491 | HTR5A     | 0.63  |
| hsa-mir-491 | ITPR1     | 0.45  |
| hsa-mir-491 | JAKMIP1   | 0.52  |
| hsa-mir-491 | KCNH3     | 0.53  |
| hsa-mir-491 | KCNJ12    | 0.59  |
| hsa-mir-491 | KCNJ6     | 0.21  |
| hsa-mir-491 | KCNK1     | 0.5   |
| hsa-mir-491 | KIAA0284  | 0.48  |
| hsa-mir-491 | KIAA0748  | 0.68  |
| hsa-mir-491 | KIAA1622  | 0.64  |
| hsa-mir-491 | KLHL1     | 0.61  |
| hsa-mir-491 | KLHL2     | 0.52  |
| hsa-mir-491 | KLK7      | 0.68  |
| hsa-mir-491 | LINGO2    | 0.58  |
| hsa-mir-491 | LMO7      | 0.56  |
| hsa-mir-491 | LOC554175 | 0.52  |
| hsa-mir-491 | MAGEE1    | 0.58  |
| hsa-mir-491 | MAL2      | 0.54  |
| hsa-mir-491 | MAP2K4    | 0.59  |
| hsa-mir-491 | MAP7D2    | 0.62  |
| hsa-mir-491 | MATK      | 0.67  |
| hsa-mir-491 | MDH1      | 0.61  |
| hsa-mir-491 | MEF2C     | 0.49  |
| hsa-mir-491 | MKL2      | 0.43  |
| hsa-mir-491 | MMD       | 0.53  |
| hsa-mir-491 | MPP7      | 0.64  |
| hsa-mir-491 | MUM1L1    | 0.46  |
| hsa-mir-491 | NAP1L5    | 0.48  |
| hsa-mir-491 | NAPB      | 0.61  |
| hsa-mir-491 | NBL1      | 0.5   |
| hsa-mir-491 | NDUFB8    | 0.6   |
| hsa-mir-491 | NES       | -0.47 |
| hsa-mir-491 | NEURL     | 0.63  |
| hsa-mir-491 | NOX4      | -0.55 |
| hsa-mir-491 | NPTN      | 0.48  |
| hsa-mir-491 | NPY1R     | 0.51  |
| hsa-mir-491 | NRGN      | 0.49  |
| hsa-mir-491 | NSF       | 0.54  |
| hsa-mir-491 | NUAK1     | 0.54  |
| hsa-mir-491 | OCA2      | 0.58  |
| hsa-mir-491 | OXCT1     | 0.46  |
| hsa-mir-491 | P2RX5     | 0.45  |
| hsa-mir-491 | PELI3     | 0.54  |
| hsa-mir-491 | PI4KA     | 0.52  |
| hsa-mir-491 | PIP3-E    | 0.55  |
| hsa-mir-491 | PIP5K1B   | 0.49  |
| hsa-mir-491 | PLAC2     | 0.55  |



|             |            |       |
|-------------|------------|-------|
| hsa-mir-491 | PLEKHA1    | 0.57  |
| hsa-mir-491 | PLEKHG5    | 0.43  |
| hsa-mir-491 | PNCK       | 0.7   |
| hsa-mir-491 | PPM1H      | 0.56  |
| hsa-mir-491 | PPP2R2C    | 0.57  |
| hsa-mir-491 | PPP3CA     | 0.64  |
| hsa-mir-491 | PPP3CB     | 0.59  |
| hsa-mir-491 | PREPL      | 0.56  |
| hsa-mir-491 | PRKCB1     | 0.51  |
| hsa-mir-491 | PRKCE      | 0.65  |
| hsa-mir-491 | PRRT1      | 0.61  |
| hsa-mir-491 | PSD        | 0.64  |
| hsa-mir-491 | PSD3       | 0.5   |
| hsa-mir-491 | PTTG1IP    | -0.43 |
| hsa-mir-491 | RAB11FIP2  | 0.44  |
| hsa-mir-491 | RAB40B     | 0.55  |
| hsa-mir-491 | RASAL1     | 0.61  |
| hsa-mir-491 | RBM11      | 0.6   |
| hsa-mir-491 | RGS4       | 0.47  |
| hsa-mir-491 | RICH2      | 0.56  |
| hsa-mir-491 | RSPO2      | 0.49  |
| hsa-mir-491 | RTN4R      | 0.47  |
| hsa-mir-491 | RTN4RL1    | 0.61  |
| hsa-mir-491 | RYR2       | 0.66  |
| hsa-mir-491 | SAMD12     | 0.64  |
| hsa-mir-491 | SCARA5     | 0.45  |
| hsa-mir-491 | SCG5       | 0.27  |
| hsa-mir-491 | SH2D5      | 0.54  |
| hsa-mir-491 | SH3BGRL2   | 0.59  |
| hsa-mir-491 | SH3GL3     | 0.55  |
| hsa-mir-491 | SLC12A5    | 0.54  |
| hsa-mir-491 | SLC30A3    | 0.57  |
| hsa-mir-491 | SLC35F3    | 0.58  |
| hsa-mir-491 | SMPX       | 0.63  |
| hsa-mir-491 | SNCA       | 0.58  |
| hsa-mir-491 | SNCG       | 0.69  |
| hsa-mir-491 | SPINT2     | 0.49  |
| hsa-mir-491 | SSTR1      | 0.62  |
| hsa-mir-491 | ST6GALNAC5 | 0.41  |
| hsa-mir-491 | STAR       | 0.55  |
| hsa-mir-491 | STAT4      | 0.43  |
| hsa-mir-491 | STON1      | -0.35 |
| hsa-mir-491 | STX1A      | 0.58  |
| hsa-mir-491 | STYK1      | 0.63  |
| hsa-mir-491 | SV2B       | 0.46  |
| hsa-mir-491 | TBC1D9     | 0.43  |
| hsa-mir-491 | TCERG1L    | 0.55  |
| hsa-mir-491 | TMEM24     | 0.57  |
| hsa-mir-491 | TSPYL1     | 0.57  |
| hsa-mir-491 | TSPYL4     | 0.46  |
| hsa-mir-491 | TUBA4A     | 0.55  |
| hsa-mir-491 | TUBA8      | 0.6   |
| hsa-mir-491 | TUBB2A     | 0.41  |

|                |           |       |
|----------------|-----------|-------|
| hsa-mir-491    | UNC13C    | 0.58  |
| hsa-mir-491    | VIT       | 0.33  |
| hsa-mir-491    | VSNL1     | 0.53  |
| hsa-mir-491    | WDR47     | 0.54  |
| hsa-mir-491    | WDR7      | 0.53  |
| hsa-mir-491    | WNT10B    | 0.65  |
| hsa-mir-491    | XK        | 0.52  |
| hsa-mir-491    | YPEL5     | 0.41  |
| hsa-mir-491    | YWHAH     | 0.52  |
| hsa-mir-493-3p | C9orf47   | 0.48  |
| hsa-mir-493-3p | CAMP      | 0.14  |
| hsa-mir-493-3p | CD74      | 0.17  |
| hsa-mir-493-3p | CD86      | 0.47  |
| hsa-mir-493-3p | CGB1      | 0.35  |
| hsa-mir-493-3p | COL12A1   | 0.21  |
| hsa-mir-493-3p | COL1A1    | 0.27  |
| hsa-mir-493-3p | FLJ38723  | 0.39  |
| hsa-mir-493-3p | LAPTM5    | 0.21  |
| hsa-mir-493-3p | PCSK4     | 0.41  |
| hsa-mir-493-3p | POSTN     | 0.15  |
| hsa-mir-493-3p | SAPS1     | 0.48  |
| hsa-mir-493-3p | VPS18     | 0.43  |
| hsa-mir-494    | ALDH1L1   | -0.08 |
| hsa-mir-494    | BTBD14A   | 0.23  |
| hsa-mir-494    | C10orf81  | -0.06 |
| hsa-mir-494    | C4BPA     | 0.11  |
| hsa-mir-494    | C5orf23   | -0.13 |
| hsa-mir-494    | C7orf16   | -0.05 |
| hsa-mir-494    | C8orf4    | 0.12  |
| hsa-mir-494    | CADM2     | -0.24 |
| hsa-mir-494    | CD3G      | 0.31  |
| hsa-mir-494    | CD86      | 0.37  |
| hsa-mir-494    | CPA6      | 0.08  |
| hsa-mir-494    | EDN2      | 0.02  |
| hsa-mir-494    | FAT       | 0.1   |
| hsa-mir-494    | GSTM1     | 0.01  |
| hsa-mir-494    | HMGA2     | 0.27  |
| hsa-mir-494    | KIAA1211  | -0.26 |
| hsa-mir-494    | KRT37     | 0.2   |
| hsa-mir-494    | LGALS3    | 0.2   |
| hsa-mir-494    | LMO3      | -0.06 |
| hsa-mir-494    | LOC338328 | -0.23 |
| hsa-mir-494    | MCOLN2    | 0.27  |
| hsa-mir-494    | MED18     | 0.1   |
| hsa-mir-494    | MIA2      | 0.22  |
| hsa-mir-494    | NOL4      | -0.37 |
| hsa-mir-494    | NPTX2     | 0.06  |
| hsa-mir-494    | NR0B1     | -0.05 |
| hsa-mir-494    | NUP62CL   | 0.2   |
| hsa-mir-494    | PHLDA2    | 0.3   |
| hsa-mir-494    | PITX2     | 0.12  |
| hsa-mir-494    | POSTN     | 0.22  |
| hsa-mir-494    | RHBDL3    | -0.31 |

|             |           |       |
|-------------|-----------|-------|
| hsa-mir-494 | SAA4      | 0.22  |
| hsa-mir-494 | SORCS3    | -0.24 |
| hsa-mir-494 | SYT4      | -0.22 |
| hsa-mir-494 | VPS18     | 0.38  |
| hsa-mir-494 | VWC2      | -0.14 |
| hsa-mir-497 | ADCYAP1R1 | 0.36  |
| hsa-mir-497 | AHCYL1    | 0.4   |
| hsa-mir-497 | ANKFN1    | 0.51  |
| hsa-mir-497 | ATP13A4   | 0.41  |
| hsa-mir-497 | ATP6V1G2  | 0.13  |
| hsa-mir-497 | BAZ2B     | 0.45  |
| hsa-mir-497 | BBS2      | 0.43  |
| hsa-mir-497 | BDH2      | 0.36  |
| hsa-mir-497 | BTBD16    | -0.26 |
| hsa-mir-497 | C10orf65  | 0.39  |
| hsa-mir-497 | C18orf16  | 0.41  |
| hsa-mir-497 | C1QTNF5   | 0.41  |
| hsa-mir-497 | C6orf105  | -0.41 |
| hsa-mir-497 | C6orf173  | -0.38 |
| hsa-mir-497 | CEP55     | -0.14 |
| hsa-mir-497 | CHST9     | 0.45  |
| hsa-mir-497 | CRB1      | 0.35  |
| hsa-mir-497 | CTHRC1    | -0.31 |
| hsa-mir-497 | CXCR7     | 0.36  |
| hsa-mir-497 | CYP3A4    | 0.2   |
| hsa-mir-497 | DAZ4      | -0.25 |
| hsa-mir-497 | DOCK7     | 0.28  |
| hsa-mir-497 | DTNA      | 0.42  |
| hsa-mir-497 | EGFR      | 0.46  |
| hsa-mir-497 | FAT3      | 0.36  |
| hsa-mir-497 | FHL2      | -0.43 |
| hsa-mir-497 | GAS2      | -0.35 |
| hsa-mir-497 | GLI2      | 0.35  |
| hsa-mir-497 | GLRX3     | -0.43 |
| hsa-mir-497 | GRAMD3    | 0.4   |
| hsa-mir-497 | GSG1L     | 0.37  |
| hsa-mir-497 | HEPACAM   | 0.46  |
| hsa-mir-497 | HMGA2     | -0.44 |
| hsa-mir-497 | IFT140    | 0.42  |
| hsa-mir-497 | KCNN2     | 0.47  |
| hsa-mir-497 | KIAA1505  | 0.39  |
| hsa-mir-497 | LFNG      | 0.42  |
| hsa-mir-497 | LIFR      | 0.41  |
| hsa-mir-497 | LOC129881 | 0.32  |
| hsa-mir-497 | LRP4      | 0.49  |
| hsa-mir-497 | LRRC48    | 0.42  |
| hsa-mir-497 | MAGEC2    | -0.16 |
| hsa-mir-497 | MASP1     | 0.42  |
| hsa-mir-497 | MCTP2     | -0.31 |
| hsa-mir-497 | MET       | -0.45 |
| hsa-mir-497 | MGC13057  | 0.4   |
| hsa-mir-497 | MME       | -0.31 |
| hsa-mir-497 | MMP7      | -0.23 |

|             |              |       |
|-------------|--------------|-------|
| hsa-mir-497 | MSTN         | 0.38  |
| hsa-mir-497 | NFIA         | 0.41  |
| hsa-mir-497 | NFIX         | 0.39  |
| hsa-mir-497 | ODZ3         | -0.27 |
| hsa-mir-497 | PHKG1        | 0.39  |
| hsa-mir-497 | PLEKHH3      | 0.44  |
| hsa-mir-497 | POPDC3       | -0.47 |
| hsa-mir-497 | PSD2         | 0.39  |
| hsa-mir-497 | PTPLA        | -0.38 |
| hsa-mir-497 | RAVER2       | 0.44  |
| hsa-mir-497 | RFX2         | 0.48  |
| hsa-mir-497 | RGMA         | 0.43  |
| hsa-mir-497 | RNF128       | -0.31 |
| hsa-mir-497 | ROBO2        | 0.37  |
| hsa-mir-497 | SEMA3A       | -0.32 |
| hsa-mir-497 | SEMA3C       | -0.37 |
| hsa-mir-497 | SEMA6A       | 0.35  |
| hsa-mir-497 | SFRP2        | -0.35 |
| hsa-mir-497 | SGCD         | -0.36 |
| hsa-mir-497 | SGEF         | 0.49  |
| hsa-mir-497 | SH3GL2       | -0.02 |
| hsa-mir-497 | SOX21        | 0.27  |
| hsa-mir-497 | STK33        | 0.42  |
| hsa-mir-497 | SUMF2        | 0.42  |
| hsa-mir-497 | SYTL4        | 0.45  |
| hsa-mir-497 | TFPI2        | -0.35 |
| hsa-mir-497 | TMOD4        | 0.38  |
| hsa-mir-497 | TNMD         | 0.05  |
| hsa-mir-497 | TRPA1        | -0.24 |
| hsa-mir-497 | TSPAN19      | -0.36 |
| hsa-mir-497 | ZBTB20       | 0.48  |
| hsa-mir-497 | ZFP2         | 0.35  |
| hsa-mir-497 | ZHX1         | 0.42  |
| hsa-mir-497 | ZNF652       | 0.11  |
| hsa-mir-498 | C1orf54      | 0.07  |
| hsa-mir-498 | C1orf87      | -0.17 |
| hsa-mir-498 | DACH2        | -0.2  |
| hsa-mir-498 | KIT          | -0.19 |
| hsa-mir-498 | RP13-102H20. | -0.2  |
| hsa-mir-509 | ALG13        | 0.22  |
| hsa-mir-509 | ARHGEF7      | -0.26 |
| hsa-mir-509 | BSN          | -0.27 |
| hsa-mir-509 | C4orf30      | -0.24 |
| hsa-mir-509 | CSTA         | 0.19  |
| hsa-mir-509 | FBXL16       | -0.27 |
| hsa-mir-509 | KCNH8        | -0.33 |
| hsa-mir-509 | LRP6         | -0.37 |
| hsa-mir-509 | NOL4         | -0.25 |
| hsa-mir-509 | PCDH11Y      | -0.24 |
| hsa-mir-509 | PSMB9        | 0.26  |
| hsa-mir-509 | RNF165       | -0.33 |
| hsa-mir-509 | SLITRK4      | -0.2  |
| hsa-mir-509 | TBC1D3P2     | -0.29 |

|             |          |       |
|-------------|----------|-------|
| hsa-mir-509 | TMEM35   | -0.2  |
| hsa-mir-509 | ZMAT1    | -0.29 |
| hsa-mir-513 | ACTBL1   | 0.31  |
| hsa-mir-513 | AK7      | 0.08  |
| hsa-mir-513 | ALX1     | 0.3   |
| hsa-mir-513 | ANPEP    | 0.37  |
| hsa-mir-513 | ASTN1    | -0.27 |
| hsa-mir-513 | ATHL1    | 0.33  |
| hsa-mir-513 | BAIAP2L1 | 0.29  |
| hsa-mir-513 | BIK      | 0.21  |
| hsa-mir-513 | C11orf75 | 0.31  |
| hsa-mir-513 | C12orf54 | -0.33 |
| hsa-mir-513 | C12orf56 | 0.18  |
| hsa-mir-513 | C15orf26 | 0.09  |
| hsa-mir-513 | C18orf2  | 0.3   |
| hsa-mir-513 | C18orf34 | -0.37 |
| hsa-mir-513 | C4BPA    | 0.17  |
| hsa-mir-513 | C4BPB    | 0.3   |
| hsa-mir-513 | C4orf7   | 0.19  |
| hsa-mir-513 | C9orf47  | 0.45  |
| hsa-mir-513 | CADM2    | -0.28 |
| hsa-mir-513 | CARHSP1  | 0.23  |
| hsa-mir-513 | CD5      | 0.26  |
| hsa-mir-513 | CD70     | 0.36  |
| hsa-mir-513 | CD86     | 0.43  |
| hsa-mir-513 | CDH16    | 0.24  |
| hsa-mir-513 | CDH20    | -0.35 |
| hsa-mir-513 | CEACAM1  | 0.29  |
| hsa-mir-513 | CES1     | 0.3   |
| hsa-mir-513 | CGB1     | 0.42  |
| hsa-mir-513 | CHRNA3   | 0.03  |
| hsa-mir-513 | CHST4    | 0.12  |
| hsa-mir-513 | CNTN1    | -0.36 |
| hsa-mir-513 | CYP2F1   | 0.29  |
| hsa-mir-513 | DAPL1    | -0.19 |
| hsa-mir-513 | DEFA4    | -0.14 |
| hsa-mir-513 | DERL3    | 0.37  |
| hsa-mir-513 | DLK1     | 0.21  |
| hsa-mir-513 | DNAH8    | 0.18  |
| hsa-mir-513 | ELA3A    | 0.16  |
| hsa-mir-513 | FAM112B  | 0.27  |
| hsa-mir-513 | FAM5B    | -0.31 |
| hsa-mir-513 | FAM9B    | 0.26  |
| hsa-mir-513 | FBXL21   | 0.25  |
| hsa-mir-513 | FGB      | 0.25  |
| hsa-mir-513 | FLJ21075 | 0.3   |
| hsa-mir-513 | FLJ32658 | 0.21  |
| hsa-mir-513 | FLJ38723 | 0.42  |
| hsa-mir-513 | FRRS1    | 0.28  |
| hsa-mir-513 | GABRE    | 0.18  |
| hsa-mir-513 | GDF9     | -0.4  |
| hsa-mir-513 | GFI1     | 0.3   |
| hsa-mir-513 | GLDN     | 0.05  |

|             |           |       |
|-------------|-----------|-------|
| hsa-mir-513 | GPR157    | 0.43  |
| hsa-mir-513 | GRIK4     | -0.29 |
| hsa-mir-513 | GYPB      | 0.27  |
| hsa-mir-513 | GYPC      | 0.38  |
| hsa-mir-513 | HAND1     | 0.35  |
| hsa-mir-513 | HIST1H2BA | 0.26  |
| hsa-mir-513 | HMGA2     | 0.3   |
| hsa-mir-513 | HSH2D     | 0.32  |
| hsa-mir-513 | HSPA1L    | -0.26 |
| hsa-mir-513 | ICAM4     | 0.3   |
| hsa-mir-513 | IGLV2-14  | 0.33  |
| hsa-mir-513 | IL11      | 0.28  |
| hsa-mir-513 | IL23R     | 0.29  |
| hsa-mir-513 | IRX2      | 0.01  |
| hsa-mir-513 | KLK12     | 0.2   |
| hsa-mir-513 | KRT16     | 0.31  |
| hsa-mir-513 | KRT37     | 0.26  |
| hsa-mir-513 | KRT6A     | 0.32  |
| hsa-mir-513 | LCK       | 0.35  |
| hsa-mir-513 | LDLRAD1   | 0.32  |
| hsa-mir-513 | LEFTY2    | 0.26  |
| hsa-mir-513 | LMO3      | -0.09 |
| hsa-mir-513 | LOC158830 | 0.34  |
| hsa-mir-513 | LRP1B     | -0.29 |
| hsa-mir-513 | MAP2      | -0.37 |
| hsa-mir-513 | MED18     | 0.13  |
| hsa-mir-513 | MIA2      | 0.3   |
| hsa-mir-513 | MIG7      | -0.3  |
| hsa-mir-513 | MS4A3     | 0.26  |
| hsa-mir-513 | MSMB      | 0.27  |
| hsa-mir-513 | MX2       | 0.3   |
| hsa-mir-513 | MYL7      | 0.31  |
| hsa-mir-513 | MYLC2PL   | 0.28  |
| hsa-mir-513 | NLRP7     | 0.26  |
| hsa-mir-513 | NOL4      | -0.39 |
| hsa-mir-513 | NTRK2     | -0.29 |
| hsa-mir-513 | ODAM      | 0.27  |
| hsa-mir-513 | OSTbeta   | 0.12  |
| hsa-mir-513 | PAPPA     | 0.31  |
| hsa-mir-513 | PDILT     | 0.21  |
| hsa-mir-513 | PHLDA2    | 0.35  |
| hsa-mir-513 | PIAS4     | 0.28  |
| hsa-mir-513 | PITX2     | 0.11  |
| hsa-mir-513 | PLEKHN1   | 0.36  |
| hsa-mir-513 | PNLIPRP2  | 0.16  |
| hsa-mir-513 | POSTN     | 0.23  |
| hsa-mir-513 | POTE15    | 0.3   |
| hsa-mir-513 | PPM1F     | 0.43  |
| hsa-mir-513 | PRELP     | -0.21 |
| hsa-mir-513 | PTGFR     | 0.3   |
| hsa-mir-513 | RAB9B     | -0.3  |
| hsa-mir-513 | RFTN2     | -0.35 |
| hsa-mir-513 | RPA4      | 0.4   |

|             |           |       |
|-------------|-----------|-------|
| hsa-mir-513 | SALL4     | 0.27  |
| hsa-mir-513 | SAPS1     | 0.45  |
| hsa-mir-513 | SEC14L4   | 0.22  |
| hsa-mir-513 | SEC63     | -0.08 |
| hsa-mir-513 | SERPINA10 | 0.24  |
| hsa-mir-513 | SERPINB3  | 0.26  |
| hsa-mir-513 | SERPINB5  | 0.23  |
| hsa-mir-513 | SIT1      | 0.33  |
| hsa-mir-513 | SKAP1     | 0.32  |
| hsa-mir-513 | SLC17A2   | 0.29  |
| hsa-mir-513 | SLC45A2   | 0.26  |
| hsa-mir-513 | SLC6A4    | 0.25  |
| hsa-mir-513 | SORCS3    | -0.3  |
| hsa-mir-513 | SPINK5    | 0.21  |
| hsa-mir-513 | SPINK5L3  | 0.23  |
| hsa-mir-513 | SPINK6    | 0.13  |
| hsa-mir-513 | SPRR1B    | 0.34  |
| hsa-mir-513 | STARD6    | -0.25 |
| hsa-mir-513 | TMPRSS4   | 0.26  |
| hsa-mir-513 | TNNI2     | 0.26  |
| hsa-mir-513 | TOX       | -0.13 |
| hsa-mir-513 | TRPA1     | 0.27  |
| hsa-mir-513 | TSPY2     | 0.21  |
| hsa-mir-513 | UGT2B7    | 0.18  |
| hsa-mir-513 | UTS2      | 0.29  |
| hsa-mir-513 | VPS18     | 0.52  |
| hsa-mir-513 | WASF2     | 0.3   |
| hsa-mir-513 | WBSCR28   | 0.15  |
| hsa-mir-513 | WIT1      | 0.27  |
| hsa-mir-514 | BEX2      | -0.17 |
| hsa-mir-514 | C1orf110  | -0.12 |
| hsa-mir-514 | C1QL2     | -0.09 |
| hsa-mir-514 | C2orf48   | -0.11 |
| hsa-mir-514 | C6orf15   | 0.22  |
| hsa-mir-514 | CCDC102B  | 0.06  |
| hsa-mir-514 | CD34      | 0.13  |
| hsa-mir-514 | DCN       | 0.2   |
| hsa-mir-514 | DNASE2B   | 0.2   |
| hsa-mir-514 | FLRT1     | -0.16 |
| hsa-mir-514 | GPR139    | -0.17 |
| hsa-mir-514 | hCG_16001 | 0.24  |
| hsa-mir-514 | IL1RAPL1  | -0.14 |
| hsa-mir-514 | KIAA1843  | -0.22 |
| hsa-mir-514 | RAB11FIP4 | -0.13 |
| hsa-mir-514 | REG1B     | 0.28  |
| hsa-mir-514 | SCN4B     | -0.2  |
| hsa-mir-514 | SPATA1    | 0.22  |
| hsa-mir-514 | SPATA6    | 0.11  |
| hsa-mir-514 | TMEM40    | 0.16  |
| hsa-mir-514 | TNFSF14   | -0.14 |
| hsa-mir-514 | TRIM49    | 0.29  |
| hsa-mir-514 | TRPM3     | 0.18  |
| hsa-mir-514 | WDR5B     | 0.11  |

|                |           |       |
|----------------|-----------|-------|
| hsa-mir-515-3p | CLCN2     | 0.27  |
| hsa-mir-515-3p | EIF4G1    | 0.31  |
| hsa-mir-515-3p | FOLR3     | 0.01  |
| hsa-mir-515-3p | GPR128    | 0.33  |
| hsa-mir-515-3p | MAGEF1    | 0.23  |
| hsa-mir-515-3p | PARK7     | -0.06 |
| hsa-mir-515-3p | PSMD2     | 0.33  |
| hsa-mir-515-3p | TBX1      | 0.26  |
| hsa-mir-518b   | KIAA0746  | -0.04 |
| hsa-mir-518c*  | C9orf47   | 0.49  |
| hsa-mir-518c*  | CABP7     | 0.42  |
| hsa-mir-518c*  | CCL13     | 0.33  |
| hsa-mir-518c*  | CD86      | 0.47  |
| hsa-mir-518c*  | CHI3L2    | 0.14  |
| hsa-mir-518c*  | IGKV1-5   | 0.28  |
| hsa-mir-518c*  | PCSK4     | 0.41  |
| hsa-mir-518c*  | PLTP      | 0.26  |
| hsa-mir-518c*  | SAPS1     | 0.48  |
| hsa-mir-519e*  | ANXA4     | 0.31  |
| hsa-mir-519e*  | CDS2      | 0.3   |
| hsa-mir-519e*  | DDIT4L    | 0.29  |
| hsa-mir-519e*  | GPNMB     | 0.17  |
| hsa-mir-519e*  | RASSF4    | 0.15  |
| hsa-mir-520b   | C9orf47   | 0.37  |
| hsa-mir-520b   | CD52      | 0.16  |
| hsa-mir-520b   | CD86      | 0.33  |
| hsa-mir-520b   | CXCL5     | 0.27  |
| hsa-mir-520b   | FLJ22662  | 0.13  |
| hsa-mir-520b   | SAPS1     | 0.36  |
| hsa-mir-520b   | VPS18     | 0.34  |
| hsa-mir-520b   | ZNF347    | -0.11 |
| hsa-mir-520d*  | COX6A2    | 0.21  |
| hsa-mir-520d*  | GPR150    | 0.22  |
| hsa-mir-520d*  | MAGI3     | -0.22 |
| hsa-mir-520d*  | MAPK6     | -0.22 |
| hsa-mir-520d*  | ZNF571    | -0.17 |
| hsa-mir-521    | HINT3     | -0.03 |
| hsa-mir-521    | SFI1      | 0     |
| hsa-mir-525    | AMAC1     | 0.46  |
| hsa-mir-525    | ANKRD30A  | -0.15 |
| hsa-mir-527    | C20orf199 | 0.16  |
| hsa-mir-527    | DLG7      | -0.03 |
| hsa-mir-527    | FAM19A1   | -0.26 |
| hsa-mir-527    | FAM54A    | -0.02 |
| hsa-mir-527    | SPSB2     | 0.25  |
| hsa-mir-527    | TTK       | -0.09 |
| hsa-mir-532    | ADSSL1    | -0.23 |
| hsa-mir-532    | AMH       | 0.29  |
| hsa-mir-532    | C21orf82  | 0.34  |
| hsa-mir-532    | CCDC48    | 0.29  |
| hsa-mir-532    | CHST9     | 0.32  |
| hsa-mir-532    | CORO1A    | -0.27 |
| hsa-mir-532    | HSPB3     | -0.03 |



|                |           |       |
|----------------|-----------|-------|
| hsa-mir-532    | ISOC1     | 0.11  |
| hsa-mir-532    | LYST      | 0.19  |
| hsa-mir-532    | MIG7      | 0.36  |
| hsa-mir-532    | MSTN      | 0.34  |
| hsa-mir-532    | PRKX      | 0.19  |
| hsa-mir-532    | RAB20     | -0.18 |
| hsa-mir-532    | RARRES2   | 0.03  |
| hsa-mir-532    | ST3GAL6   | -0.08 |
| hsa-mir-532    | SVEP1     | 0.05  |
| hsa-mir-532    | THBS4     | 0.15  |
| hsa-mir-532    | TMEM27    | 0.35  |
| hsa-mir-532    | WWC3      | 0.22  |
| hsa-mir-542-3p | APOF      | 0.22  |
| hsa-mir-542-3p | ART4      | 0.25  |
| hsa-mir-542-3p | BAAT      | 0.32  |
| hsa-mir-542-3p | C10orf65  | -0.31 |
| hsa-mir-542-3p | CTCFL     | 0.23  |
| hsa-mir-542-3p | IGSF6     | -0.21 |
| hsa-mir-542-3p | KLRC4     | 0.31  |
| hsa-mir-542-3p | LOC441601 | 0.26  |
| hsa-mir-542-3p | MAGEA8    | 0.24  |
| hsa-mir-542-3p | MAGEC1    | 0.21  |
| hsa-mir-542-3p | MAGEC2    | 0.17  |
| hsa-mir-542-3p | MDM1      | -0.16 |
| hsa-mir-542-3p | MIRH1     | 0.29  |
| hsa-mir-542-3p | MRGPRX3   | 0.23  |
| hsa-mir-542-3p | MS4A3     | 0.24  |
| hsa-mir-542-3p | MSMB      | 0.25  |
| hsa-mir-542-3p | NAT8      | 0.24  |
| hsa-mir-542-3p | OR1D2     | 0.32  |
| hsa-mir-542-3p | OR51I1    | 0.25  |
| hsa-mir-542-3p | PRDM9     | 0.27  |
| hsa-mir-542-3p | SERPINA11 | 0.21  |
| hsa-mir-542-3p | SERPINB2  | 0.14  |
| hsa-mir-542-3p | SERPINB3  | 0.25  |
| hsa-mir-542-3p | SLC17A2   | 0.28  |
| hsa-mir-542-3p | SLC45A2   | 0.28  |
| hsa-mir-542-3p | SPINK5    | 0.29  |
| hsa-mir-542-3p | TRPM1     | 0.28  |
| hsa-mir-542-3p | TSPY2     | 0.24  |
| hsa-mir-542-3p | UNC93A    | 0.24  |
| hsa-mir-542-3p | WNK4      | 0.14  |
| hsa-mir-542-5p | CLEC4E    | -0.22 |
| hsa-mir-542-5p | CYP4F11   | -0.2  |
| hsa-mir-542-5p | HFE2      | 0.08  |
| hsa-mir-542-5p | MEX3B     | 0.22  |
| hsa-mir-542-5p | MGC16121  | 0.27  |
| hsa-mir-542-5p | PDGFRA    | 0.33  |
| hsa-mir-542-5p | PRO0132   | -0.09 |
| hsa-mir-542-5p | SPINK5    | 0.17  |
| hsa-mir-551b   | ADAM22    | 0.34  |
| hsa-mir-551b   | ALDH1A3   | -0.37 |
| hsa-mir-551b   | ANK1      | -0.42 |

|              |          |       |
|--------------|----------|-------|
| hsa-mir-551b | ARC      | 0.29  |
| hsa-mir-551b | ARHGEF5  | -0.43 |
| hsa-mir-551b | ASAM     | -0.41 |
| hsa-mir-551b | ASCL1    | 0.48  |
| hsa-mir-551b | BAIAP2L1 | -0.44 |
| hsa-mir-551b | BCHE     | 0.39  |
| hsa-mir-551b | C18orf34 | 0.38  |
| hsa-mir-551b | C1orf172 | -0.42 |
| hsa-mir-551b | C21orf96 | -0.41 |
| hsa-mir-551b | C6orf105 | -0.41 |
| hsa-mir-551b | C6orf134 | 0.42  |
| hsa-mir-551b | C7orf13  | -0.16 |
| hsa-mir-551b | C7orf29  | -0.28 |
| hsa-mir-551b | CADM2    | 0.34  |
| hsa-mir-551b | CCL27    | 0.2   |
| hsa-mir-551b | CD5      | -0.25 |
| hsa-mir-551b | CD55     | -0.49 |
| hsa-mir-551b | CD96     | -0.36 |
| hsa-mir-551b | CDC42EP3 | -0.24 |
| hsa-mir-551b | CDGAP    | 0.35  |
| hsa-mir-551b | CDH20    | 0.34  |
| hsa-mir-551b | CHST9    | 0.53  |
| hsa-mir-551b | CRB1     | 0.5   |
| hsa-mir-551b | CRMP1    | 0.34  |
| hsa-mir-551b | DCLK2    | 0.45  |
| hsa-mir-551b | DPP6     | 0.39  |
| hsa-mir-551b | EFHB     | 0.39  |
| hsa-mir-551b | EPHB1    | 0.37  |
| hsa-mir-551b | ESX1     | -0.38 |
| hsa-mir-551b | FAM70A   | 0.43  |
| hsa-mir-551b | FAT3     | 0.36  |
| hsa-mir-551b | FBLN1    | -0.4  |
| hsa-mir-551b | FGF14    | 0.19  |
| hsa-mir-551b | FGL1     | -0.35 |
| hsa-mir-551b | FHL1     | 0.4   |
| hsa-mir-551b | FLJ36031 | -0.35 |
| hsa-mir-551b | GAB1     | 0.45  |
| hsa-mir-551b | GABRE    | -0.33 |
| hsa-mir-551b | GADD45G  | 0.4   |
| hsa-mir-551b | GALR1    | 0.23  |
| hsa-mir-551b | GAS6     | -0.38 |
| hsa-mir-551b | GDF9     | 0.51  |
| hsa-mir-551b | GRIA4    | 0.43  |
| hsa-mir-551b | GRIK4    | 0.39  |
| hsa-mir-551b | GSG1L    | 0.45  |
| hsa-mir-551b | GSTM1    | 0.07  |
| hsa-mir-551b | GSX2     | 0.36  |
| hsa-mir-551b | HGD      | -0.25 |
| hsa-mir-551b | HOOK1    | -0.31 |
| hsa-mir-551b | IGFBP6   | -0.41 |
| hsa-mir-551b | IGSF11   | 0.43  |
| hsa-mir-551b | KCND2    | 0.36  |
| hsa-mir-551b | KLF5     | -0.36 |

|              |           |       |
|--------------|-----------|-------|
| hsa-mir-551b | KLHDC8A   | 0.4   |
| hsa-mir-551b | KLHL13    | 0.3   |
| hsa-mir-551b | KLHL4     | 0.23  |
| hsa-mir-551b | LCK       | -0.4  |
| hsa-mir-551b | LHFPL3    | 0.25  |
| hsa-mir-551b | LOC285382 | 0.43  |
| hsa-mir-551b | LOC389073 | 0.35  |
| hsa-mir-551b | LOC400657 | 0.36  |
| hsa-mir-551b | LRG1      | -0.38 |
| hsa-mir-551b | MAGEC2    | -0.21 |
| hsa-mir-551b | MAP2      | 0.46  |
| hsa-mir-551b | MCTP2     | -0.39 |
| hsa-mir-551b | MEIG1     | 0.24  |
| hsa-mir-551b | MET       | -0.36 |
| hsa-mir-551b | MME       | -0.46 |
| hsa-mir-551b | MSTN      | 0.39  |
| hsa-mir-551b | MYH7      | 0.4   |
| hsa-mir-551b | MYLC2PL   | -0.37 |
| hsa-mir-551b | NOL4      | 0.39  |
| hsa-mir-551b | NOVA1     | 0.48  |
| hsa-mir-551b | NOVA2     | 0.33  |
| hsa-mir-551b | NRG1      | -0.23 |
| hsa-mir-551b | NUDT12    | 0.33  |
| hsa-mir-551b | PAMCI     | -0.32 |
| hsa-mir-551b | PAPPA     | -0.41 |
| hsa-mir-551b | PCDHB10   | 0.38  |
| hsa-mir-551b | PDCD1     | -0.29 |
| hsa-mir-551b | PGAM2     | 0.38  |
| hsa-mir-551b | PGAP1     | 0.36  |
| hsa-mir-551b | PIGX      | 0.26  |
| hsa-mir-551b | PLA1A     | -0.4  |
| hsa-mir-551b | PLAGL1    | -0.41 |
| hsa-mir-551b | POPDC3    | -0.39 |
| hsa-mir-551b | POU2AF1   | -0.29 |
| hsa-mir-551b | PRELID2   | -0.25 |
| hsa-mir-551b | PRMT3     | 0.34  |
| hsa-mir-551b | PTER      | -0.44 |
| hsa-mir-551b | PTGER2    | -0.43 |
| hsa-mir-551b | PTGFR     | -0.49 |
| hsa-mir-551b | PURG      | 0.41  |
| hsa-mir-551b | RFTN2     | 0.46  |
| hsa-mir-551b | RFX4      | 0.47  |
| hsa-mir-551b | ROBO2     | 0.39  |
| hsa-mir-551b | RPP25     | -0.37 |
| hsa-mir-551b | SCN3A     | 0.46  |
| hsa-mir-551b | SEC14L4   | -0.35 |
| hsa-mir-551b | SEMA3C    | -0.36 |
| hsa-mir-551b | SEMA6D    | 0.23  |
| hsa-mir-551b | SIT1      | -0.28 |
| hsa-mir-551b | SKAP1     | -0.41 |
| hsa-mir-551b | SLC6A15   | -0.46 |
| hsa-mir-551b | SLC6A4    | -0.41 |
| hsa-mir-551b | SNCAIP    | 0.44  |

|              |              |       |
|--------------|--------------|-------|
| hsa-mir-551b | SPINK5       | -0.36 |
| hsa-mir-551b | SRR          | 0.37  |
| hsa-mir-551b | STARD6       | 0.4   |
| hsa-mir-551b | TFAP2C       | -0.46 |
| hsa-mir-551b | TFPI2        | -0.33 |
| hsa-mir-551b | TP53TG3      | -0.27 |
| hsa-mir-551b | TRIM49       | -0.19 |
| hsa-mir-551b | TRIM58       | -0.33 |
| hsa-mir-551b | TSPAN8       | -0.34 |
| hsa-mir-551b | WNK3         | 0.36  |
| hsa-mir-551b | YIPF7        | 0.5   |
| hsa-mir-551b | ZDHHC15      | 0.45  |
| hsa-mir-551b | ZFP37        | 0.35  |
| hsa-mir-551b | ZNF22        | 0.45  |
| hsa-mir-551b | ZNF501       | 0.45  |
| hsa-mir-551b | ZNF711       | 0.42  |
| hsa-mir-557  | ACTN4        | 0.11  |
| hsa-mir-557  | AQP9         | 0.23  |
| hsa-mir-557  | C9orf47      | 0.49  |
| hsa-mir-557  | CABP7        | 0.34  |
| hsa-mir-557  | CD86         | 0.41  |
| hsa-mir-557  | CGB1         | 0.35  |
| hsa-mir-557  | CXCL1        | 0.26  |
| hsa-mir-557  | CXCL5        | 0.28  |
| hsa-mir-557  | FLJ38723     | 0.38  |
| hsa-mir-557  | GCLC         | -0.12 |
| hsa-mir-557  | IL1F10       | 0.43  |
| hsa-mir-557  | IL1R2        | 0.24  |
| hsa-mir-557  | KCNH2        | -0.18 |
| hsa-mir-557  | PCSK4        | 0.37  |
| hsa-mir-557  | RP13-102H20. | -0.2  |
| hsa-mir-557  | RPA4         | 0.41  |
| hsa-mir-557  | SAPS1        | 0.45  |
| hsa-mir-557  | SLCO1C1      | -0.15 |
| hsa-mir-557  | VPS18        | 0.41  |
| hsa-mir-557  | ZNF319       | -0.24 |
| hsa-mir-560  | ARHGAP22     | 0.24  |
| hsa-mir-560  | C9orf47      | 0.57  |
| hsa-mir-560  | CABP7        | 0.43  |
| hsa-mir-560  | CD86         | 0.52  |
| hsa-mir-560  | CGB1         | 0.37  |
| hsa-mir-560  | FLJ38723     | 0.44  |
| hsa-mir-560  | IL1F10       | 0.48  |
| hsa-mir-560  | OSTbeta      | 0.19  |
| hsa-mir-560  | PCSK4        | 0.48  |
| hsa-mir-560  | PMP2         | -0.12 |
| hsa-mir-560  | RPA4         | 0.53  |
| hsa-mir-560  | RPL39        | 0.24  |
| hsa-mir-560  | SAPS1        | 0.55  |
| hsa-mir-560  | TSC22D1      | -0.3  |
| hsa-mir-560  | VPS18        | 0.49  |
| hsa-mir-564  | C11orf75     | 0.3   |
| hsa-mir-564  | CGB1         | 0.37  |

|             |              |       |
|-------------|--------------|-------|
| hsa-mir-564 | FBXL21       | 0.24  |
| hsa-mir-564 | FGB          | 0.25  |
| hsa-mir-564 | HMGA2        | 0.24  |
| hsa-mir-564 | MME          | 0.29  |
| hsa-mir-564 | NUPL2        | -0.28 |
| hsa-mir-564 | PLEKHN1      | 0.31  |
| hsa-mir-564 | PNLIPRP2     | 0.15  |
| hsa-mir-564 | SAPS1        | 0.41  |
| hsa-mir-564 | SERPINA11    | 0.26  |
| hsa-mir-564 | SERPINB3     | 0.22  |
| hsa-mir-564 | SORCS3       | -0.17 |
| hsa-mir-564 | TSPY2        | 0.19  |
| hsa-mir-564 | UGT2B7       | 0.21  |
| hsa-mir-564 | VPS18        | 0.46  |
| hsa-mir-565 | ALX1         | -0.19 |
| hsa-mir-565 | C3orf41      | -0.07 |
| hsa-mir-565 | CACNG1       | 0.18  |
| hsa-mir-565 | CCL7         | 0     |
| hsa-mir-565 | CGB1         | -0.33 |
| hsa-mir-565 | CRYAB        | -0.29 |
| hsa-mir-565 | DAZ4         | -0.03 |
| hsa-mir-565 | DEPDC6       | -0.32 |
| hsa-mir-565 | DKK1         | 0     |
| hsa-mir-565 | DNAH10       | 0.28  |
| hsa-mir-565 | ECHDC3       | -0.35 |
| hsa-mir-565 | EFHB         | 0.24  |
| hsa-mir-565 | FA2H         | -0.09 |
| hsa-mir-565 | FOXP1        | 0.16  |
| hsa-mir-565 | GAMT         | -0.21 |
| hsa-mir-565 | GLI4         | -0.2  |
| hsa-mir-565 | HOXB2        | 0.01  |
| hsa-mir-565 | HPR          | -0.1  |
| hsa-mir-565 | KLHL7        | 0.25  |
| hsa-mir-565 | LOC285382    | 0.28  |
| hsa-mir-565 | LYL1         | -0.39 |
| hsa-mir-565 | MT3          | -0.31 |
| hsa-mir-565 | NEDD1        | 0.33  |
| hsa-mir-565 | NNT          | 0.24  |
| hsa-mir-565 | PCTK2        | 0.29  |
| hsa-mir-565 | PIGF         | 0.13  |
| hsa-mir-565 | RFXAP        | 0.32  |
| hsa-mir-565 | RNF138       | 0.34  |
| hsa-mir-565 | RP13-102H20. | -0.11 |
| hsa-mir-565 | RQCD1        | 0.26  |
| hsa-mir-565 | RSPRY1       | 0.3   |
| hsa-mir-565 | SALL1        | 0.14  |
| hsa-mir-565 | SCRG1        | -0.26 |
| hsa-mir-565 | SEMA3E       | 0.05  |
| hsa-mir-565 | SIAH1        | 0.3   |
| hsa-mir-565 | SLC35A5      | 0.23  |
| hsa-mir-565 | SPON1        | -0.02 |
| hsa-mir-565 | TMEM63A      | -0.4  |
| hsa-mir-565 | VBP1         | 0.26  |

|             |             |       |
|-------------|-------------|-------|
| hsa-mir-565 | VPS18       | -0.39 |
| hsa-mir-565 | WASF1       | 0.11  |
| hsa-mir-565 | WDR5B       | 0.41  |
| hsa-mir-565 | ZBTB43      | -0.05 |
| hsa-mir-565 | ZNF140      | 0.34  |
| hsa-mir-565 | ZNF639      | 0.34  |
| hsa-mir-572 | ADAMDEC1    | 0.14  |
| hsa-mir-572 | ADORA1      | -0.22 |
| hsa-mir-572 | AQP9        | 0.2   |
| hsa-mir-572 | ASNA1       | -0.21 |
| hsa-mir-572 | ASPN        | 0.14  |
| hsa-mir-572 | C14orf44    | -0.27 |
| hsa-mir-572 | C15orf17    | -0.21 |
| hsa-mir-572 | C18orf51    | -0.24 |
| hsa-mir-572 | C19orf36    | -0.23 |
| hsa-mir-572 | C1orf192    | 0.04  |
| hsa-mir-572 | C21orf62    | 0.04  |
| hsa-mir-572 | C9orf47     | 0.35  |
| hsa-mir-572 | CAPN6       | -0.12 |
| hsa-mir-572 | CGB1        | 0.12  |
| hsa-mir-572 | CHST10      | -0.38 |
| hsa-mir-572 | COL1A2      | 0.19  |
| hsa-mir-572 | CRIP1       | 0.1   |
| hsa-mir-572 | CT45-6      | -0.19 |
| hsa-mir-572 | CXorf20     | 0.16  |
| hsa-mir-572 | ERH         | -0.28 |
| hsa-mir-572 | FLJ32658    | -0.13 |
| hsa-mir-572 | FLJ38723    | 0.2   |
| hsa-mir-572 | FOXN4       | 0.01  |
| hsa-mir-572 | FUT8        | -0.11 |
| hsa-mir-572 | GYPB        | -0.19 |
| hsa-mir-572 | ISOC2       | -0.26 |
| hsa-mir-572 | ITM2C       | -0.26 |
| hsa-mir-572 | LOC441601   | -0.2  |
| hsa-mir-572 | MAGEA8      | -0.16 |
| hsa-mir-572 | MAGEC1      | -0.16 |
| hsa-mir-572 | MAGEC2      | -0.12 |
| hsa-mir-572 | METRN       | -0.25 |
| hsa-mir-572 | MMP12       | 0.07  |
| hsa-mir-572 | MS4A3       | -0.18 |
| hsa-mir-572 | MSMB        | -0.17 |
| hsa-mir-572 | MT3         | -0.06 |
| hsa-mir-572 | NAPSA       | -0.07 |
| hsa-mir-572 | OR51B5      | -0.15 |
| hsa-mir-572 | PMP2        | -0.06 |
| hsa-mir-572 | PPBP        | 0.28  |
| hsa-mir-572 | PRDM13      | -0.13 |
| hsa-mir-572 | RP13-36C9.6 | -0.18 |
| hsa-mir-572 | SERPINB3    | -0.16 |
| hsa-mir-572 | SLC25A11    | -0.26 |
| hsa-mir-572 | SOSTDC1     | -0.05 |
| hsa-mir-572 | SPINK5      | -0.1  |
| hsa-mir-572 | SPRR1B      | -0.21 |

|             |           |       |
|-------------|-----------|-------|
| hsa-mir-572 | TCEA2     | -0.21 |
| hsa-mir-574 | AHSA2     | 0.23  |
| hsa-mir-574 | AMY2A     | 0.25  |
| hsa-mir-574 | AMY2B     | 0.32  |
| hsa-mir-574 | APAF1     | 0.32  |
| hsa-mir-574 | BHLHB4    | -0.13 |
| hsa-mir-574 | C1orf63   | 0.28  |
| hsa-mir-574 | C4orf28   | 0.24  |
| hsa-mir-574 | C6orf26   | 0.29  |
| hsa-mir-574 | CCDC126   | 0.09  |
| hsa-mir-574 | CCDC66    | 0.07  |
| hsa-mir-574 | CCDC84    | 0.31  |
| hsa-mir-574 | CCNC      | 0.16  |
| hsa-mir-574 | CCNL1     | 0.34  |
| hsa-mir-574 | CPT1B     | 0.2   |
| hsa-mir-574 | CTSZ      | -0.27 |
| hsa-mir-574 | DFNB59    | 0.31  |
| hsa-mir-574 | EGFL11    | -0.02 |
| hsa-mir-574 | EXPH5     | 0     |
| hsa-mir-574 | FAM122C   | 0.3   |
| hsa-mir-574 | FAM55A    | -0.04 |
| hsa-mir-574 | G0S2      | -0.11 |
| hsa-mir-574 | GNRH1     | 0.3   |
| hsa-mir-574 | HFM1      | 0.18  |
| hsa-mir-574 | IL13RA2   | -0.03 |
| hsa-mir-574 | IL7R      | -0.1  |
| hsa-mir-574 | IL8       | -0.07 |
| hsa-mir-574 | KIAA0258  | -0.18 |
| hsa-mir-574 | KRTCAP3   | 0.28  |
| hsa-mir-574 | LOC152573 | 0.07  |
| hsa-mir-574 | LOC339047 | 0.28  |
| hsa-mir-574 | LUC7L     | 0.24  |
| hsa-mir-574 | LYG1      | 0.29  |
| hsa-mir-574 | MBIP      | 0.15  |
| hsa-mir-574 | MIF       | -0.05 |
| hsa-mir-574 | NMU       | 0.05  |
| hsa-mir-574 | NPFF      | 0.28  |
| hsa-mir-574 | OTUD7A    | -0.13 |
| hsa-mir-574 | PDPR      | -0.07 |
| hsa-mir-574 | PHACS     | -0.02 |
| hsa-mir-574 | PILRB     | 0.21  |
| hsa-mir-574 | PLEKHH2   | 0.23  |
| hsa-mir-574 | POSTN     | -0.01 |
| hsa-mir-574 | PRPF39    | 0.37  |
| hsa-mir-574 | RBM11     | -0.07 |
| hsa-mir-574 | RPRML     | -0.02 |
| hsa-mir-574 | SENP7     | 0.35  |
| hsa-mir-574 | TEX12     | -0.09 |
| hsa-mir-574 | TIA1      | 0.33  |
| hsa-mir-574 | TUBE1     | 0.31  |
| hsa-mir-574 | VENTXP1   | -0.18 |
| hsa-mir-574 | VSNL1     | -0.11 |
| hsa-mir-574 | WSB1      | 0.34  |

|             |          |       |
|-------------|----------|-------|
| hsa-mir-574 | ZC3H11A  | 0.11  |
| hsa-mir-574 | ZNF429   | 0.27  |
| hsa-mir-574 | ZNF83    | 0.33  |
| hsa-mir-575 | ABCG1    | 0.29  |
| hsa-mir-575 | ADAM8    | 0.24  |
| hsa-mir-575 | ALDH1A3  | 0.19  |
| hsa-mir-575 | ALPK2    | 0.25  |
| hsa-mir-575 | AQP9     | 0.28  |
| hsa-mir-575 | ARHGAP22 | 0.25  |
| hsa-mir-575 | C9orf47  | 0.48  |
| hsa-mir-575 | CABP7    | 0.38  |
| hsa-mir-575 | CCL18    | 0.38  |
| hsa-mir-575 | CCL23    | 0.33  |
| hsa-mir-575 | CD28     | 0.29  |
| hsa-mir-575 | CD86     | 0.47  |
| hsa-mir-575 | CEBPA    | 0.16  |
| hsa-mir-575 | CGB1     | 0.35  |
| hsa-mir-575 | CLIC3    | 0.29  |
| hsa-mir-575 | CMTM7    | 0.34  |
| hsa-mir-575 | COL1A1   | 0.36  |
| hsa-mir-575 | COL1A2   | 0.31  |
| hsa-mir-575 | COL6A3   | 0.39  |
| hsa-mir-575 | CTSD     | 0.28  |
| hsa-mir-575 | CXCL1    | 0.25  |
| hsa-mir-575 | CXCL13   | 0.24  |
| hsa-mir-575 | F13A1    | 0.33  |
| hsa-mir-575 | FAP      | 0.24  |
| hsa-mir-575 | FLJ36031 | 0.28  |
| hsa-mir-575 | FLJ38723 | 0.37  |
| hsa-mir-575 | FOLR2    | 0.28  |
| hsa-mir-575 | GPR109B  | 0.25  |
| hsa-mir-575 | IER3     | 0.28  |
| hsa-mir-575 | IL21R    | 0.26  |
| hsa-mir-575 | IL7R     | 0.34  |
| hsa-mir-575 | IL8      | 0.24  |
| hsa-mir-575 | INHBA    | 0.3   |
| hsa-mir-575 | LOX      | 0.25  |
| hsa-mir-575 | LUM      | 0.37  |
| hsa-mir-575 | MAFB     | 0.27  |
| hsa-mir-575 | MAPK13   | 0.35  |
| hsa-mir-575 | MARCO    | 0.3   |
| hsa-mir-575 | MMP1     | 0.28  |
| hsa-mir-575 | PAQR6    | -0.18 |
| hsa-mir-575 | PCSK4    | 0.35  |
| hsa-mir-575 | PTX3     | 0.21  |
| hsa-mir-575 | RARRES1  | 0.26  |
| hsa-mir-575 | RNASE1   | 0.35  |
| hsa-mir-575 | S100A8   | 0.27  |
| hsa-mir-575 | SAA1     | 0.19  |
| hsa-mir-575 | SAPS1    | 0.47  |
| hsa-mir-575 | SFRS8    | -0.06 |
| hsa-mir-575 | SLC16A3  | 0.28  |
| hsa-mir-575 | SLC5A8   | 0.1   |



|             |          |       |
|-------------|----------|-------|
| hsa-mir-575 | SLC7A10  | 0.01  |
| hsa-mir-575 | THBD     | 0.3   |
| hsa-mir-575 | TRPS1    | -0.1  |
| hsa-mir-575 | VDR      | 0.34  |
| hsa-mir-575 | VPS18    | 0.42  |
| hsa-mir-579 | C6orf57  | -0.26 |
| hsa-mir-579 | EIF4E3   | -0.24 |
| hsa-mir-579 | EPDR1    | -0.25 |
| hsa-mir-579 | FAP      | -0.16 |
| hsa-mir-579 | RAB33B   | -0.26 |
| hsa-mir-590 | ASGR1    | -0.09 |
| hsa-mir-590 | GPC5     | -0.24 |
| hsa-mir-595 | ARRB2    | 0.08  |
| hsa-mir-595 | ARRDC5   | 0.15  |
| hsa-mir-595 | BIN2     | 0.09  |
| hsa-mir-595 | C16orf73 | 0.07  |
| hsa-mir-595 | CREG1    | -0.01 |
| hsa-mir-595 | CXCL10   | -0.02 |
| hsa-mir-595 | ERH      | 0.17  |
| hsa-mir-595 | FPRL2    | -0.02 |
| hsa-mir-595 | GLDN     | 0.01  |
| hsa-mir-595 | HCK      | -0.04 |
| hsa-mir-595 | MKMK1    | 0.03  |
| hsa-mir-595 | OLR1     | 0.04  |
| hsa-mir-595 | P2RY5    | 0.06  |
| hsa-mir-595 | PILRA    | 0.12  |
| hsa-mir-595 | PNMT     | -0.1  |
| hsa-mir-595 | SPINK5   | 0.02  |
| hsa-mir-595 | SSPO     | 0.23  |
| hsa-mir-595 | SUCNR1   | -0.01 |
| hsa-mir-595 | TEX12    | 0     |
| hsa-mir-595 | TFEC     | 0     |
| hsa-mir-595 | VPS13C   | 0.11  |
| hsa-mir-595 | ZBED2    | -0.26 |
| hsa-mir-598 | BZRAP1   | 0.41  |
| hsa-mir-598 | FAM79B   | -0.34 |
| hsa-mir-601 | AQP9     | 0.3   |
| hsa-mir-601 | ARHGAP22 | 0.22  |
| hsa-mir-601 | BTC      | 0.26  |
| hsa-mir-601 | C9orf47  | 0.47  |
| hsa-mir-601 | CA3      | 0.02  |
| hsa-mir-601 | CABP7    | 0.42  |
| hsa-mir-601 | CCL20    | 0.24  |
| hsa-mir-601 | CCL7     | 0.32  |
| hsa-mir-601 | CD86     | 0.47  |
| hsa-mir-601 | CGB1     | 0.32  |
| hsa-mir-601 | CTSD     | 0.27  |
| hsa-mir-601 | CXCL5    | 0.29  |
| hsa-mir-601 | FLJ38723 | 0.35  |
| hsa-mir-601 | FOLR2    | 0.34  |
| hsa-mir-601 | FPRL2    | 0.34  |
| hsa-mir-601 | GPNMB    | 0.22  |
| hsa-mir-601 | IL1F10   | 0.4   |

|             |           |       |
|-------------|-----------|-------|
| hsa-mir-601 | IL7R      | 0.33  |
| hsa-mir-601 | IL8       | 0.18  |
| hsa-mir-601 | LILRB3    | 0.28  |
| hsa-mir-601 | MAFB      | 0.25  |
| hsa-mir-601 | MMP1      | 0.24  |
| hsa-mir-601 | MS4A7     | 0.3   |
| hsa-mir-601 | PI3       | 0.29  |
| hsa-mir-601 | RNASE1    | 0.34  |
| hsa-mir-601 | SAPS1     | 0.44  |
| hsa-mir-601 | THBD      | 0.23  |
| hsa-mir-605 | ATP5B     | -0.23 |
| hsa-mir-605 | C20orf177 | -0.3  |
| hsa-mir-605 | MDM2      | 0.23  |
| hsa-mir-605 | RETN      | 0.23  |
| hsa-mir-605 | TAC1      | -0.36 |
| hsa-mir-605 | VCAN      | 0.26  |
| hsa-mir-610 | CRLF1     | 0.09  |
| hsa-mir-610 | DOCK5     | 0.24  |
| hsa-mir-610 | EPB41L3   | 0.04  |
| hsa-mir-610 | F5        | 0.3   |
| hsa-mir-610 | FA2H      | 0.15  |
| hsa-mir-610 | FLJ45557  | -0.26 |
| hsa-mir-610 | G0S2      | -0.05 |
| hsa-mir-610 | GJB1      | 0.26  |
| hsa-mir-610 | MGC26356  | -0.17 |
| hsa-mir-610 | SEC61G    | -0.07 |
| hsa-mir-610 | SH3GL3    | 0.08  |
| hsa-mir-610 | TAC1      | -0.3  |
| hsa-mir-610 | ZNF452    | -0.12 |
| hsa-mir-615 | ARRDC5    | 0.1   |
| hsa-mir-615 | BIN2      | 0.04  |
| hsa-mir-615 | C16orf73  | 0.06  |
| hsa-mir-615 | COL1A1    | -0.1  |
| hsa-mir-615 | CXCL10    | 0     |
| hsa-mir-615 | FOXM2     | 0.11  |
| hsa-mir-615 | G0S2      | -0.07 |
| hsa-mir-615 | GBP4      | -0.1  |
| hsa-mir-615 | NHN1      | 0.05  |
| hsa-mir-615 | SPINK5    | 0     |
| hsa-mir-615 | VPS13C    | 0.16  |
| hsa-mir-616 | ACTBL1    | -0.16 |
| hsa-mir-616 | AFMID     | -0.2  |
| hsa-mir-616 | ALG13     | -0.09 |
| hsa-mir-616 | ALX1      | -0.19 |
| hsa-mir-616 | ANKRD11   | 0.14  |
| hsa-mir-616 | APH1A     | -0.08 |
| hsa-mir-616 | ARHGEF18  | 0.15  |
| hsa-mir-616 | ASNA1     | -0.1  |
| hsa-mir-616 | BBS10     | -0.22 |
| hsa-mir-616 | BTBD12    | 0.11  |
| hsa-mir-616 | C12orf29  | -0.25 |
| hsa-mir-616 | C14orf104 | -0.11 |
| hsa-mir-616 | C14orf129 | -0.15 |

|             |           |       |
|-------------|-----------|-------|
| hsa-mir-616 | C14orf142 | -0.08 |
| hsa-mir-616 | C17orf42  | -0.17 |
| hsa-mir-616 | C17orf45  | -0.19 |
| hsa-mir-616 | C20orf196 | -0.1  |
| hsa-mir-616 | C8orf32   | -0.18 |
| hsa-mir-616 | CAPZA2    | -0.01 |
| hsa-mir-616 | CCNC      | -0.14 |
| hsa-mir-616 | CEPT1     | -0.14 |
| hsa-mir-616 | CFL2      | -0.11 |
| hsa-mir-616 | CGRRF1    | -0.13 |
| hsa-mir-616 | CLEC16A   | 0.16  |
| hsa-mir-616 | CLEC2A    | -0.14 |
| hsa-mir-616 | CNIH      | -0.16 |
| hsa-mir-616 | COMMD10   | -0.11 |
| hsa-mir-616 | CRIPAK    | 0.14  |
| hsa-mir-616 | DAPP1     | -0.13 |
| hsa-mir-616 | DCK       | -0.18 |
| hsa-mir-616 | DDX27     | 0.14  |
| hsa-mir-616 | DKK4      | -0.14 |
| hsa-mir-616 | DNAJB9    | -0.12 |
| hsa-mir-616 | DNTT      | -0.19 |
| hsa-mir-616 | DST       | 0.12  |
| hsa-mir-616 | ERC1      | 0.13  |
| hsa-mir-616 | EVI2A     | -0.08 |
| hsa-mir-616 | F13B      | -0.18 |
| hsa-mir-616 | FAM105A   | -0.06 |
| hsa-mir-616 | FAM118B   | -0.16 |
| hsa-mir-616 | FAM49B    | -0.08 |
| hsa-mir-616 | FBXL3     | -0.14 |
| hsa-mir-616 | GBAS      | -0.02 |
| hsa-mir-616 | GNGT1     | -0.2  |
| hsa-mir-616 | GYG1      | -0.17 |
| hsa-mir-616 | IMPA1     | -0.12 |
| hsa-mir-616 | KLK12     | -0.19 |
| hsa-mir-616 | KRBA1     | 0.09  |
| hsa-mir-616 | LASP1     | 0.1   |
| hsa-mir-616 | LYL1      | -0.07 |
| hsa-mir-616 | LYRM1     | -0.11 |
| hsa-mir-616 | M-RIP     | 0.09  |
| hsa-mir-616 | MACF1     | 0.14  |
| hsa-mir-616 | MAT2B     | -0.1  |
| hsa-mir-616 | MED31     | -0.16 |
| hsa-mir-616 | NCOR2     | 0.14  |
| hsa-mir-616 | NSL1      | -0.09 |
| hsa-mir-616 | NUP62CL   | -0.17 |
| hsa-mir-616 | PAGE2B    | -0.2  |
| hsa-mir-616 | PDCD10    | -0.12 |
| hsa-mir-616 | PDE6D     | -0.17 |
| hsa-mir-616 | POLB      | -0.13 |
| hsa-mir-616 | PRDM14    | -0.18 |
| hsa-mir-616 | PTCRA     | 0.03  |
| hsa-mir-616 | PTPN11    | 0.08  |
| hsa-mir-616 | PXMP3     | -0.1  |

|             |           |       |
|-------------|-----------|-------|
| hsa-mir-616 | RAG2      | -0.18 |
| hsa-mir-616 | RCHY1     | -0.12 |
| hsa-mir-616 | SCRIB     | 0.16  |
| hsa-mir-616 | SELT      | -0.11 |
| hsa-mir-616 | SEMG1     | -0.18 |
| hsa-mir-616 | SLCO1B1   | -0.17 |
| hsa-mir-616 | SPATA13   | 0.14  |
| hsa-mir-616 | SPINK4    | -0.18 |
| hsa-mir-616 | STX2      | 0.03  |
| hsa-mir-616 | TAF15     | 0.13  |
| hsa-mir-616 | THOP1     | 0.1   |
| hsa-mir-616 | TMED2     | -0.13 |
| hsa-mir-616 | TNNI2     | -0.09 |
| hsa-mir-616 | TNRC15    | 0.17  |
| hsa-mir-616 | TRIM15    | -0.19 |
| hsa-mir-616 | WDR51B    | -0.12 |
| hsa-mir-616 | XYLT2     | 0.16  |
| hsa-mir-616 | YWHAE     | -0.16 |
| hsa-mir-616 | ZFAND2A   | -0.07 |
| hsa-mir-616 | ZNF627    | -0.12 |
| hsa-mir-622 | ARHGAP22  | 0.28  |
| hsa-mir-622 | ART5      | 0.19  |
| hsa-mir-622 | C9orf47   | 0.57  |
| hsa-mir-622 | CABP7     | 0.44  |
| hsa-mir-622 | CD86      | 0.53  |
| hsa-mir-622 | CGB1      | 0.48  |
| hsa-mir-622 | COL23A1   | -0.05 |
| hsa-mir-622 | FLJ38723  | 0.48  |
| hsa-mir-622 | FLJ45717  | 0.16  |
| hsa-mir-622 | HLA-DQA2  | 0.14  |
| hsa-mir-622 | IL1F10    | 0.52  |
| hsa-mir-622 | LOC285382 | -0.3  |
| hsa-mir-622 | MGC45922  | 0.18  |
| hsa-mir-622 | PCSK4     | 0.48  |
| hsa-mir-622 | PGAP1     | -0.25 |
| hsa-mir-622 | PRAME     | 0.09  |
| hsa-mir-622 | SAPS1     | 0.58  |
| hsa-mir-622 | SF3A2     | 0.19  |
| hsa-mir-622 | UTF1      | 0.2   |
| hsa-mir-622 | VPS18     | 0.55  |
| hsa-mir-622 | ZNF138    | -0.13 |
| hsa-mir-623 | C9orf47   | 0.51  |
| hsa-mir-623 | CD86      | 0.41  |
| hsa-mir-623 | CGB1      | 0.39  |
| hsa-mir-623 | COX6A2    | 0.12  |
| hsa-mir-623 | FLJ38723  | 0.43  |
| hsa-mir-623 | IFITM5    | 0.17  |
| hsa-mir-623 | IL1F10    | 0.47  |
| hsa-mir-623 | KLHL4     | -0.21 |
| hsa-mir-623 | PCSK4     | 0.45  |
| hsa-mir-623 | RPA4      | 0.47  |
| hsa-mir-623 | SAPS1     | 0.48  |
| hsa-mir-623 | TMEM125   | 0.04  |

|             |           |       |
|-------------|-----------|-------|
| hsa-mir-623 | VPS18     | 0.47  |
| hsa-mir-629 | C9orf47   | 0.36  |
| hsa-mir-629 | CCL2      | 0.09  |
| hsa-mir-629 | EVI2B     | -0.01 |
| hsa-mir-629 | FLJ38723  | 0.34  |
| hsa-mir-629 | LOC442582 | 0.26  |
| hsa-mir-629 | RNASE6    | 0.14  |
| hsa-mir-629 | RPA4      | 0.38  |
| hsa-mir-629 | RPL23AP13 | 0.07  |
| hsa-mir-630 | ABAT      | -0.35 |
| hsa-mir-630 | ACTA2     | 0.28  |
| hsa-mir-630 | ACTG2     | 0.27  |
| hsa-mir-630 | AGXT2L1   | -0.24 |
| hsa-mir-630 | AQP9      | 0.31  |
| hsa-mir-630 | ARHGAP22  | 0.17  |
| hsa-mir-630 | ATP1A2    | -0.17 |
| hsa-mir-630 | BCL2A1    | 0.3   |
| hsa-mir-630 | C10orf58  | -0.3  |
| hsa-mir-630 | C15orf48  | 0.32  |
| hsa-mir-630 | C18orf51  | -0.27 |
| hsa-mir-630 | C19orf59  | 0.35  |
| hsa-mir-630 | C1orf213  | -0.14 |
| hsa-mir-630 | C1orf64   | -0.2  |
| hsa-mir-630 | C4orf31   | -0.02 |
| hsa-mir-630 | C9orf47   | 0.53  |
| hsa-mir-630 | CA14      | -0.3  |
| hsa-mir-630 | CABP7     | 0.37  |
| hsa-mir-630 | CCK       | -0.19 |
| hsa-mir-630 | CCL2      | 0.28  |
| hsa-mir-630 | CCL20     | 0.32  |
| hsa-mir-630 | CCL26     | 0.31  |
| hsa-mir-630 | CCL7      | 0.35  |
| hsa-mir-630 | CD52      | 0.29  |
| hsa-mir-630 | CD86      | 0.52  |
| hsa-mir-630 | CDH10     | -0.24 |
| hsa-mir-630 | CGB1      | 0.33  |
| hsa-mir-630 | CLEC2B    | 0.35  |
| hsa-mir-630 | CNN1      | 0.23  |
| hsa-mir-630 | CNN2      | 0.4   |
| hsa-mir-630 | COL1A1    | 0.41  |
| hsa-mir-630 | COL3A1    | 0.39  |
| hsa-mir-630 | COL6A3    | 0.43  |
| hsa-mir-630 | CRISP3    | -0.03 |
| hsa-mir-630 | CTNND2    | -0.31 |
| hsa-mir-630 | CTSZ      | 0.34  |
| hsa-mir-630 | CXCL1     | 0.35  |
| hsa-mir-630 | CXCL2     | 0.3   |
| hsa-mir-630 | CXCL3     | 0.31  |
| hsa-mir-630 | CXCL5     | 0.36  |
| hsa-mir-630 | CXCL6     | 0.33  |
| hsa-mir-630 | CYP1B1    | 0.29  |
| hsa-mir-630 | DCN       | 0.26  |
| hsa-mir-630 | DEFA3     | 0.2   |

|             |           |       |
|-------------|-----------|-------|
| hsa-mir-630 | ELL3      | 0.09  |
| hsa-mir-630 | ENTHD1    | 0.23  |
| hsa-mir-630 | FAM26F    | 0.23  |
| hsa-mir-630 | FLJ38723  | 0.38  |
| hsa-mir-630 | FLJ45557  | 0.02  |
| hsa-mir-630 | FOXO1     | -0.04 |
| hsa-mir-630 | G0S2      | 0.24  |
| hsa-mir-630 | G30       | 0     |
| hsa-mir-630 | GPC1      | 0.03  |
| hsa-mir-630 | GPR109B   | 0.3   |
| hsa-mir-630 | HIST1H1C  | 0.02  |
| hsa-mir-630 | HIST1H2BA | 0.19  |
| hsa-mir-630 | HPR       | 0.03  |
| hsa-mir-630 | HYMAI     | 0.13  |
| hsa-mir-630 | IER3      | 0.29  |
| hsa-mir-630 | IER5L     | 0.24  |
| hsa-mir-630 | IFNA14    | 0.16  |
| hsa-mir-630 | IGKV1-5   | 0.27  |
| hsa-mir-630 | IL1F10    | 0.44  |
| hsa-mir-630 | IL6       | 0.27  |
| hsa-mir-630 | IL7R      | 0.37  |
| hsa-mir-630 | IL8       | 0.31  |
| hsa-mir-630 | INDO      | 0.18  |
| hsa-mir-630 | ITM2A     | -0.2  |
| hsa-mir-630 | KCNJ15    | 0.38  |
| hsa-mir-630 | LANCL2    | -0.05 |
| hsa-mir-630 | LEMD1     | 0.04  |
| hsa-mir-630 | LOC401431 | -0.24 |
| hsa-mir-630 | LOX       | 0.35  |
| hsa-mir-630 | LRRN2     | -0.15 |
| hsa-mir-630 | LUM       | 0.38  |
| hsa-mir-630 | MAP3K8    | 0.27  |
| hsa-mir-630 | MARCO     | 0.32  |
| hsa-mir-630 | MFAP4     | 0.11  |
| hsa-mir-630 | MME       | 0.31  |
| hsa-mir-630 | MMP1      | 0.35  |
| hsa-mir-630 | MMP19     | 0.32  |
| hsa-mir-630 | MSTN      | -0.25 |
| hsa-mir-630 | NDRG2     | -0.29 |
| hsa-mir-630 | NNMT      | 0.27  |
| hsa-mir-630 | NOL4      | -0.26 |
| hsa-mir-630 | NR0B1     | -0.06 |
| hsa-mir-630 | NUDT11    | -0.36 |
| hsa-mir-630 | OR52E2    | 0.07  |
| hsa-mir-630 | OSTbeta   | 0.11  |
| hsa-mir-630 | PCOLCE    | 0.33  |
| hsa-mir-630 | PCSK4     | 0.45  |
| hsa-mir-630 | PHGDH     | -0.26 |
| hsa-mir-630 | PI3       | 0.32  |
| hsa-mir-630 | PITX2     | 0.08  |
| hsa-mir-630 | PLAC8     | 0.04  |
| hsa-mir-630 | PPBP      | 0.31  |
| hsa-mir-630 | PRDM13    | -0.05 |

|             |              |       |
|-------------|--------------|-------|
| hsa-mir-630 | PSCDBP       | 0.32  |
| hsa-mir-630 | PTX3         | 0.3   |
| hsa-mir-630 | RLBP1        | -0.24 |
| hsa-mir-630 | ROPN1L       | 0.02  |
| hsa-mir-630 | RP13-102H20. | -0.12 |
| hsa-mir-630 | RPA4         | 0.45  |
| hsa-mir-630 | S100A12      | 0.27  |
| hsa-mir-630 | S100A8       | 0.32  |
| hsa-mir-630 | S100A9       | 0.31  |
| hsa-mir-630 | SAA1         | 0.24  |
| hsa-mir-630 | SALL3        | -0.29 |
| hsa-mir-630 | SAPS1        | 0.5   |
| hsa-mir-630 | SEMA3A       | 0.16  |
| hsa-mir-630 | SFRP2        | 0.25  |
| hsa-mir-630 | SLPI         | 0.3   |
| hsa-mir-630 | SPINK1       | 0.28  |
| hsa-mir-630 | SPINK6       | 0.25  |
| hsa-mir-630 | SPON1        | -0.2  |
| hsa-mir-630 | SPON2        | 0.21  |
| hsa-mir-630 | TMEM166      | 0.25  |
| hsa-mir-630 | TMEM182      | -0.18 |
| hsa-mir-630 | TPM2         | 0.31  |
| hsa-mir-630 | TRIML1       | 0.06  |
| hsa-mir-630 | TSLP         | 0.3   |
| hsa-mir-630 | UHRF2        | 0.12  |
| hsa-mir-630 | ULBP2        | 0.17  |
| hsa-mir-630 | VDR          | 0.38  |
| hsa-mir-630 | VPS18        | 0.43  |
| hsa-mir-630 | VSX1         | -0.23 |
| hsa-mir-630 | ZC3H11A      | 0     |
| hsa-mir-630 | ZP1          | 0.24  |
| hsa-mir-631 | C2orf54      | -0.17 |
| hsa-mir-631 | IL15         | 0.16  |
| hsa-mir-631 | OLR1         | 0.09  |
| hsa-mir-631 | PLA2G7       | 0.02  |
| hsa-mir-631 | SLN          | -0.02 |
| hsa-mir-631 | SUSD2        | 0.01  |
| hsa-mir-633 | ATF5         | 0.3   |
| hsa-mir-633 | BST2         | 0.15  |
| hsa-mir-633 | CEACAM5      | 0.07  |
| hsa-mir-633 | CHRNA9       | 0.17  |
| hsa-mir-633 | CITED4       | 0.18  |
| hsa-mir-633 | DPPA2        | 0.18  |
| hsa-mir-633 | DPPA4        | 0.26  |
| hsa-mir-633 | TMEM154      | 0.18  |
| hsa-mir-633 | TRIB3        | 0.24  |
| hsa-mir-638 | ACSBG1       | -0.22 |
| hsa-mir-638 | AGXT2L1      | -0.18 |
| hsa-mir-638 | ANGPTL4      | 0.16  |
| hsa-mir-638 | AQP9         | 0.29  |
| hsa-mir-638 | ASPN         | 0.24  |
| hsa-mir-638 | ATP13A4      | -0.12 |
| hsa-mir-638 | ATP1A2       | -0.19 |

|             |              |       |
|-------------|--------------|-------|
| hsa-mir-638 | C18orf51     | -0.32 |
| hsa-mir-638 | C19orf36     | -0.3  |
| hsa-mir-638 | C9orf47      | 0.39  |
| hsa-mir-638 | CA3          | 0.06  |
| hsa-mir-638 | CD86         | 0.34  |
| hsa-mir-638 | CHST10       | -0.47 |
| hsa-mir-638 | COL1A1       | 0.31  |
| hsa-mir-638 | COL6A3       | 0.33  |
| hsa-mir-638 | CT45-6       | -0.28 |
| hsa-mir-638 | CXCL13       | 0.21  |
| hsa-mir-638 | DDX58        | 0.05  |
| hsa-mir-638 | DKK1         | 0.15  |
| hsa-mir-638 | EDN3         | -0.19 |
| hsa-mir-638 | F5           | 0.05  |
| hsa-mir-638 | FCN3         | 0.31  |
| hsa-mir-638 | FOXN4        | 0.06  |
| hsa-mir-638 | GABRB1       | -0.18 |
| hsa-mir-638 | GNRH1        | 0.14  |
| hsa-mir-638 | GPNMB        | 0.18  |
| hsa-mir-638 | HAPLN1       | 0     |
| hsa-mir-638 | HIST1H2BA    | 0.07  |
| hsa-mir-638 | HMGA2        | 0.05  |
| hsa-mir-638 | HPR          | -0.09 |
| hsa-mir-638 | IL18R1       | 0.37  |
| hsa-mir-638 | IL6          | 0.22  |
| hsa-mir-638 | ITM2C        | -0.31 |
| hsa-mir-638 | KCNN3        | -0.28 |
| hsa-mir-638 | KCTD8        | -0.15 |
| hsa-mir-638 | LIPG         | 0.1   |
| hsa-mir-638 | LRRC17       | -0.11 |
| hsa-mir-638 | MAGEE2       | 0.07  |
| hsa-mir-638 | NDRG2        | -0.28 |
| hsa-mir-638 | NOL4         | -0.02 |
| hsa-mir-638 | PLAC8        | -0.14 |
| hsa-mir-638 | PLP1         | -0.11 |
| hsa-mir-638 | PPBP         | 0.32  |
| hsa-mir-638 | PRDM13       | -0.09 |
| hsa-mir-638 | RARRES1      | 0.13  |
| hsa-mir-638 | RP13-102H20. | -0.18 |
| hsa-mir-638 | RPA4         | 0.36  |
| hsa-mir-638 | RPESP        | 0.14  |
| hsa-mir-638 | SCG5         | -0.21 |
| hsa-mir-638 | SERPINA5     | 0.11  |
| hsa-mir-638 | SLC25A11     | -0.29 |
| hsa-mir-638 | SLCO1C1      | -0.09 |
| hsa-mir-638 | TGFBI        | 0.22  |
| hsa-mir-638 | TRIML1       | 0.11  |
| hsa-mir-638 | TRPM8        | 0.06  |
| hsa-mir-638 | TSC22D1      | -0.28 |
| hsa-mir-638 | UNQ9368      | 0.25  |
| hsa-mir-638 | VWC2         | -0.05 |
| hsa-mir-638 | ZNF404       | -0.08 |
| hsa-mir-638 | ZYG11A       | 0.02  |



|             |           |       |
|-------------|-----------|-------|
| hsa-mir-649 | ARHGEF2   | 0.1   |
| hsa-mir-649 | C14orf2   | -0.13 |
| hsa-mir-649 | CR1L      | -0.04 |
| hsa-mir-649 | SMARCA1   | -0.5  |
| hsa-mir-650 | C1orf102  | 0.24  |
| hsa-mir-650 | DACH1     | -0.12 |
| hsa-mir-650 | IL11      | 0.1   |
| hsa-mir-650 | NMU       | -0.19 |
| hsa-mir-650 | PLP1      | -0.02 |
| hsa-mir-652 | ALDH3A2   | 0.3   |
| hsa-mir-652 | BMPR1B    | 0.27  |
| hsa-mir-652 | C20orf91  | 0.24  |
| hsa-mir-652 | CASC1     | 0.22  |
| hsa-mir-652 | CHST9     | 0.36  |
| hsa-mir-652 | CLDN7     | -0.25 |
| hsa-mir-652 | DAO       | 0.05  |
| hsa-mir-652 | DCN       | -0.17 |
| hsa-mir-652 | DNAH7     | 0.23  |
| hsa-mir-652 | EDNRB     | 0.26  |
| hsa-mir-652 | EREG      | -0.19 |
| hsa-mir-652 | FGL1      | -0.13 |
| hsa-mir-652 | HEPACAM   | 0.35  |
| hsa-mir-652 | ID4       | 0.35  |
| hsa-mir-652 | IRX5      | -0.25 |
| hsa-mir-652 | MSTN      | 0.25  |
| hsa-mir-652 | PLA2G7    | -0.04 |
| hsa-mir-652 | PLEKHN1   | -0.25 |
| hsa-mir-652 | PMAIP1    | -0.26 |
| hsa-mir-652 | RFTN2     | 0.3   |
| hsa-mir-652 | RFX4      | 0.34  |
| hsa-mir-652 | RPA4      | -0.33 |
| hsa-mir-652 | RTBDN     | 0.34  |
| hsa-mir-652 | SEMA3C    | -0.16 |
| hsa-mir-652 | SLC26A7   | 0.09  |
| hsa-mir-652 | TSPAN3    | 0.33  |
| hsa-mir-652 | VSX1      | 0.33  |
| hsa-mir-659 | AQP9      | 0.3   |
| hsa-mir-659 | C18orf51  | -0.3  |
| hsa-mir-659 | CCL27     | -0.11 |
| hsa-mir-659 | ELOVL2    | -0.05 |
| hsa-mir-659 | HIST1H2BA | 0.16  |
| hsa-mir-659 | WSCD1     | -0.31 |
| hsa-mir-660 | ACE2      | 0.32  |
| hsa-mir-660 | AMDHD1    | 0.14  |
| hsa-mir-660 | ATF5      | 0.16  |
| hsa-mir-660 | C10orf63  | 0.31  |
| hsa-mir-660 | C10orf65  | 0.35  |
| hsa-mir-660 | C21orf82  | 0.38  |
| hsa-mir-660 | CALCA     | 0.29  |
| hsa-mir-660 | CDH19     | -0.22 |
| hsa-mir-660 | FAM40B    | 0.16  |
| hsa-mir-660 | HSPB3     | -0.08 |
| hsa-mir-660 | MIG7      | 0.34  |

|             |          |       |
|-------------|----------|-------|
| hsa-mir-660 | MSTN     | 0.3   |
| hsa-mir-660 | SP8      | 0.21  |
| hsa-mir-660 | ST3GAL6  | -0.12 |
| hsa-mir-660 | TMEM27   | 0.34  |
| hsa-mir-660 | TMEM74   | 0.16  |
| hsa-mir-660 | TTC32    | 0.32  |
| hsa-mir-663 | AFG3L2   | -0.18 |
| hsa-mir-663 | AIFM3    | -0.25 |
| hsa-mir-663 | C9orf47  | 0.47  |
| hsa-mir-663 | CABP7    | 0.41  |
| hsa-mir-663 | CBX5     | 0.33  |
| hsa-mir-663 | CDH19    | 0.1   |
| hsa-mir-663 | CHST10   | -0.38 |
| hsa-mir-663 | COL1A1   | 0.3   |
| hsa-mir-663 | COL1A2   | 0.29  |
| hsa-mir-663 | COL4A2   | 0.18  |
| hsa-mir-663 | CRLF1    | -0.05 |
| hsa-mir-663 | DSCR6    | 0.02  |
| hsa-mir-663 | EDN3     | -0.22 |
| hsa-mir-663 | GABRG2   | -0.18 |
| hsa-mir-663 | IBSP     | 0.2   |
| hsa-mir-663 | IL1F10   | 0.38  |
| hsa-mir-663 | KRT222P  | -0.18 |
| hsa-mir-663 | LGI1     | -0.3  |
| hsa-mir-663 | RPA4     | 0.44  |
| hsa-mir-663 | SAPS1    | 0.44  |
| hsa-mir-663 | SCG5     | -0.27 |
| hsa-mir-663 | SLITRK4  | -0.14 |
| hsa-mir-663 | SV2B     | -0.12 |
| hsa-mir-663 | SYNPR    | -0.07 |
| hsa-mir-663 | SYT13    | -0.12 |
| hsa-mir-663 | VIT      | -0.08 |
| hsa-mir-663 | VSNL1    | -0.14 |
| hsa-mir-671 | ARHGAP22 | 0.27  |
| hsa-mir-671 | C9orf47  | 0.58  |
| hsa-mir-671 | CABP7    | 0.45  |
| hsa-mir-671 | CD86     | 0.52  |
| hsa-mir-671 | CGB1     | 0.4   |
| hsa-mir-671 | DDIT4L   | 0.04  |
| hsa-mir-671 | FLJ37543 | -0.22 |
| hsa-mir-671 | FLJ38723 | 0.45  |
| hsa-mir-671 | FOXF2    | -0.12 |
| hsa-mir-671 | IL1F10   | 0.5   |
| hsa-mir-671 | KLHL4    | -0.2  |
| hsa-mir-671 | LAG3     | 0.19  |
| hsa-mir-671 | MME      | 0.28  |
| hsa-mir-671 | MMP1     | 0.26  |
| hsa-mir-671 | MMP12    | 0.19  |
| hsa-mir-671 | OSTbeta  | 0.16  |
| hsa-mir-671 | PCSK4    | 0.48  |
| hsa-mir-671 | RPA4     | 0.52  |
| hsa-mir-671 | S100A8   | 0.25  |
| hsa-mir-671 | SAPS1    | 0.56  |

|             |           |       |
|-------------|-----------|-------|
| hsa-mir-671 | TIMP4     | -0.02 |
| hsa-mir-671 | VCX3A     | 0.11  |
| hsa-mir-671 | VPS18     | 0.5   |
| hsa-mir-7   | March11   | 0.67  |
| hsa-mir-7   | March4    | 0.54  |
| hsa-mir-7   | A2BP1     | 0.64  |
| hsa-mir-7   | AASS      | -0.46 |
| hsa-mir-7   | ACOT7     | 0.53  |
| hsa-mir-7   | ACTN2     | 0.13  |
| hsa-mir-7   | ACVR1C    | 0.61  |
| hsa-mir-7   | ADCYAP1   | 0.51  |
| hsa-mir-7   | ADRA1B    | 0.55  |
| hsa-mir-7   | ADRA2C    | 0.55  |
| hsa-mir-7   | AFF2      | 0.43  |
| hsa-mir-7   | AIFM3     | 0.46  |
| hsa-mir-7   | AK5       | 0.6   |
| hsa-mir-7   | ANKS1B    | 0.5   |
| hsa-mir-7   | ARHGDIG   | 0.64  |
| hsa-mir-7   | ARHGEF6   | -0.42 |
| hsa-mir-7   | ARHGEF7   | 0.56  |
| hsa-mir-7   | ARP11     | 0.42  |
| hsa-mir-7   | ASPHD1    | 0.43  |
| hsa-mir-7   | ATP2B3    | 0.59  |
| hsa-mir-7   | ATP8A2    | 0.63  |
| hsa-mir-7   | BASP1     | 0.55  |
| hsa-mir-7   | BEX2      | 0.53  |
| hsa-mir-7   | BEX5      | 0.56  |
| hsa-mir-7   | BHLHB5    | 0.57  |
| hsa-mir-7   | BRUNOL4   | 0.72  |
| hsa-mir-7   | BSN       | 0.61  |
| hsa-mir-7   | BSPRY     | 0.48  |
| hsa-mir-7   | BTN3A1    | -0.32 |
| hsa-mir-7   | C10orf35  | 0.49  |
| hsa-mir-7   | C14orf149 | -0.4  |
| hsa-mir-7   | C15orf27  | 0.53  |
| hsa-mir-7   | C19orf30  | 0.63  |
| hsa-mir-7   | C1orf115  | 0.57  |
| hsa-mir-7   | C1QL3     | 0.59  |
| hsa-mir-7   | C1QTNF4   | 0.58  |
| hsa-mir-7   | C20orf174 | 0.5   |
| hsa-mir-7   | C20orf46  | 0.43  |
| hsa-mir-7   | C3orf41   | 0.01  |
| hsa-mir-7   | C5orf40   | 0.5   |
| hsa-mir-7   | C7orf13   | 0.26  |
| hsa-mir-7   | C7orf16   | 0.5   |
| hsa-mir-7   | C9orf125  | 0.52  |
| hsa-mir-7   | CABP1     | 0.65  |
| hsa-mir-7   | CABYR     | 0.54  |
| hsa-mir-7   | CACNA2D3  | 0.52  |
| hsa-mir-7   | CACNG2    | 0.56  |
| hsa-mir-7   | CACNG3    | 0.63  |
| hsa-mir-7   | CALB2     | 0.51  |
| hsa-mir-7   | CAMK1G    | 0.55  |

|           |         |       |
|-----------|---------|-------|
| hsa-mir-7 | CAMKV   | 0.65  |
| hsa-mir-7 | CARD8   | -0.5  |
| hsa-mir-7 | CARTPT  | 0.49  |
| hsa-mir-7 | CBFA2T3 | 0.53  |
| hsa-mir-7 | CBLN1   | 0.54  |
| hsa-mir-7 | CBLN2   | 0.63  |
| hsa-mir-7 | CCK     | 0.63  |
| hsa-mir-7 | CCKBR   | 0.69  |
| hsa-mir-7 | CD58    | -0.29 |
| hsa-mir-7 | CDH12   | 0.63  |
| hsa-mir-7 | CDH18   | 0.65  |
| hsa-mir-7 | CDH22   | 0.58  |
| hsa-mir-7 | CDH6    | -0.37 |
| hsa-mir-7 | CDH7    | 0.48  |
| hsa-mir-7 | CDH8    | 0.57  |
| hsa-mir-7 | CDH9    | 0.68  |
| hsa-mir-7 | CDKL5   | 0.59  |
| hsa-mir-7 | CDKN2D  | 0.58  |
| hsa-mir-7 | CHD5    | 0.68  |
| hsa-mir-7 | CHGA    | 0.68  |
| hsa-mir-7 | CHGB    | 0.61  |
| hsa-mir-7 | CHRNA3  | 0.37  |
| hsa-mir-7 | CKMT1A  | 0.68  |
| hsa-mir-7 | CLEC2L  | 0.71  |
| hsa-mir-7 | CLEC4G  | 0.54  |
| hsa-mir-7 | CLTB    | 0.7   |
| hsa-mir-7 | CNKSR2  | 0.61  |
| hsa-mir-7 | CNTNAP2 | 0.58  |
| hsa-mir-7 | CPLX2   | 0.71  |
| hsa-mir-7 | CPNE6   | 0.52  |
| hsa-mir-7 | CPNE7   | 0.52  |
| hsa-mir-7 | CREG2   | 0.63  |
| hsa-mir-7 | CRH     | 0.43  |
| hsa-mir-7 | CRHBP   | 0.59  |
| hsa-mir-7 | CRLF1   | 0.33  |
| hsa-mir-7 | CRTAC1  | 0.55  |
| hsa-mir-7 | CRYBA2  | 0.3   |
| hsa-mir-7 | CRYM    | 0.62  |
| hsa-mir-7 | CUTL2   | 0.64  |
| hsa-mir-7 | CYP26B1 | 0.49  |
| hsa-mir-7 | CYP4X1  | 0.65  |
| hsa-mir-7 | DACH2   | 0.56  |
| hsa-mir-7 | DBC1    | 0.55  |
| hsa-mir-7 | DBH     | 0.39  |
| hsa-mir-7 | DLEU7   | 0.49  |
| hsa-mir-7 | DLGAP2  | 0.55  |
| hsa-mir-7 | DNM1    | 0.61  |
| hsa-mir-7 | DOC2A   | 0.62  |
| hsa-mir-7 | DOK6    | 0.59  |
| hsa-mir-7 | DRD1    | 0.58  |
| hsa-mir-7 | DRD1IP  | 0.63  |
| hsa-mir-7 | DRD5    | 0.54  |
| hsa-mir-7 | DYDC2   | 0.47  |

|           |           |      |
|-----------|-----------|------|
| hsa-mir-7 | DYNC111   | 0.57 |
| hsa-mir-7 | EEF1A2    | 0.4  |
| hsa-mir-7 | EHD3      | 0.49 |
| hsa-mir-7 | ENC1      | 0.56 |
| hsa-mir-7 | EPB49     | 0.55 |
| hsa-mir-7 | EPHB6     | 0.62 |
| hsa-mir-7 | ERC2      | 0.56 |
| hsa-mir-7 | FABP6     | 0.56 |
| hsa-mir-7 | FAM101A   | 0.34 |
| hsa-mir-7 | FBXL16    | 0.58 |
| hsa-mir-7 | FBXO2     | 0.55 |
| hsa-mir-7 | FGF13     | 0.62 |
| hsa-mir-7 | FGF9      | 0.55 |
| hsa-mir-7 | FRMPD4    | 0.59 |
| hsa-mir-7 | FSTL5     | 0.55 |
| hsa-mir-7 | GABARAPL1 | 0.48 |
| hsa-mir-7 | GABBR2    | 0.43 |
| hsa-mir-7 | GABRA1    | 0.59 |
| hsa-mir-7 | GABRA2    | 0.5  |
| hsa-mir-7 | GABRA4    | 0.54 |
| hsa-mir-7 | GABRA5    | 0.63 |
| hsa-mir-7 | GABRB1    | 0.35 |
| hsa-mir-7 | GABRB3    | 0.58 |
| hsa-mir-7 | GABRG1    | 0.49 |
| hsa-mir-7 | GABRG2    | 0.68 |
| hsa-mir-7 | GAD2      | 0.6  |
| hsa-mir-7 | GALNTL5   | 0.65 |
| hsa-mir-7 | GDA       | 0.61 |
| hsa-mir-7 | GFOD1     | 0.56 |
| hsa-mir-7 | GJB5      | 0.49 |
| hsa-mir-7 | GJB6      | 0.47 |
| hsa-mir-7 | GLS2      | 0.65 |
| hsa-mir-7 | GLT1D1    | 0.68 |
| hsa-mir-7 | GNG3      | 0.55 |
| hsa-mir-7 | GPR26     | 0.63 |
| hsa-mir-7 | GREM2     | 0.66 |
| hsa-mir-7 | GRIN2A    | 0.54 |
| hsa-mir-7 | HAR1A     | 0.6  |
| hsa-mir-7 | HCN1      | 0.68 |
| hsa-mir-7 | HECW1     | 0.59 |
| hsa-mir-7 | HMGCLL1   | 0.55 |
| hsa-mir-7 | HMP19     | 0.59 |
| hsa-mir-7 | HOOK1     | 0.58 |
| hsa-mir-7 | HPCAL4    | 0.5  |
| hsa-mir-7 | HRNBP3    | 0.71 |
| hsa-mir-7 | HS3ST2    | 0.5  |
| hsa-mir-7 | HS6ST3    | 0.56 |
| hsa-mir-7 | HSPA12A   | 0.59 |
| hsa-mir-7 | HSPB3     | 0.55 |
| hsa-mir-7 | HTR1E     | 0.6  |
| hsa-mir-7 | HTR2A     | 0.56 |
| hsa-mir-7 | HTR2C     | 0.62 |
| hsa-mir-7 | HTR5A     | 0.69 |

|           |             |       |
|-----------|-------------|-------|
| hsa-mir-7 | ICAM5       | 0.67  |
| hsa-mir-7 | IL12RB2     | 0.57  |
| hsa-mir-7 | IL1RAPL1    | 0.49  |
| hsa-mir-7 | INA         | 0.69  |
| hsa-mir-7 | INPP5F      | 0.53  |
| hsa-mir-7 | IQCA        | 0.38  |
| hsa-mir-7 | JAKMIP1     | 0.61  |
| hsa-mir-7 | JPH3        | 0.68  |
| hsa-mir-7 | KCNA4       | 0.49  |
| hsa-mir-7 | KCNC2       | 0.63  |
| hsa-mir-7 | KCNG3       | 0.48  |
| hsa-mir-7 | KCNJ12      | 0.65  |
| hsa-mir-7 | KCNJ3       | 0.58  |
| hsa-mir-7 | KCNK1       | 0.61  |
| hsa-mir-7 | KCNK12      | 0.58  |
| hsa-mir-7 | KCNV1       | 0.64  |
| hsa-mir-7 | KHDRBS2     | 0.58  |
| hsa-mir-7 | KIAA0513    | 0.61  |
| hsa-mir-7 | KIAA0748    | 0.54  |
| hsa-mir-7 | KIAA0774    | 0.66  |
| hsa-mir-7 | KIAA1045    | 0.63  |
| hsa-mir-7 | KIAA1086    | 0.65  |
| hsa-mir-7 | KIAA1239    | 0.61  |
| hsa-mir-7 | KIAA1543    | 0.47  |
| hsa-mir-7 | KIAA1622    | 0.58  |
| hsa-mir-7 | KIAA1853    | 0.61  |
| hsa-mir-7 | KIAA1957    | 0.48  |
| hsa-mir-7 | KIAA2022    | 0.41  |
| hsa-mir-7 | KIRREL3     | 0.5   |
| hsa-mir-7 | KLHL1       | 0.64  |
| hsa-mir-7 | KLK7        | 0.58  |
| hsa-mir-7 | KRT222P     | 0.68  |
| hsa-mir-7 | KSR2        | 0.6   |
| hsa-mir-7 | LARGE       | 0.45  |
| hsa-mir-7 | LHX6        | 0.58  |
| hsa-mir-7 | LINGO2      | 0.58  |
| hsa-mir-7 | 22NC03-75B3 | 0.64  |
| hsa-mir-7 | LOC399947   | 0.46  |
| hsa-mir-7 | LOC400120   | 0.53  |
| hsa-mir-7 | LOC728215   | 0.46  |
| hsa-mir-7 | LRFN2       | 0.53  |
| hsa-mir-7 | LRFN5       | 0.6   |
| hsa-mir-7 | LRRC7       | 0.59  |
| hsa-mir-7 | LRTM2       | 0.64  |
| hsa-mir-7 | LY6H        | 0.5   |
| hsa-mir-7 | MACROD2     | 0.46  |
| hsa-mir-7 | MAL         | 0.46  |
| hsa-mir-7 | MAL2        | 0.65  |
| hsa-mir-7 | MAP7D2      | 0.64  |
| hsa-mir-7 | MATK        | 0.63  |
| hsa-mir-7 | MCOLN2      | -0.25 |
| hsa-mir-7 | MEPE        | 0.48  |
| hsa-mir-7 | MGAT4C      | 0.4   |

|           |          |       |
|-----------|----------|-------|
| hsa-mir-7 | MICAL2   | 0.58  |
| hsa-mir-7 | MUM1L1   | 0.49  |
| hsa-mir-7 | MYT1L    | 0.65  |
| hsa-mir-7 | NAP1L2   | 0.53  |
| hsa-mir-7 | NAPB     | 0.59  |
| hsa-mir-7 | NAV3     | 0.48  |
| hsa-mir-7 | NBL1     | 0.42  |
| hsa-mir-7 | NCDN     | 0.52  |
| hsa-mir-7 | NDN      | 0.32  |
| hsa-mir-7 | NEFH     | 0.61  |
| hsa-mir-7 | NEFL     | 0.61  |
| hsa-mir-7 | NEFM     | 0.69  |
| hsa-mir-7 | NETO1    | 0.55  |
| hsa-mir-7 | NEURL    | 0.72  |
| hsa-mir-7 | NGEF     | 0.54  |
| hsa-mir-7 | NMNAT2   | 0.52  |
| hsa-mir-7 | NPM2     | 0.7   |
| hsa-mir-7 | NPTX1    | 0.47  |
| hsa-mir-7 | NPY      | 0.54  |
| hsa-mir-7 | NPY1R    | 0.39  |
| hsa-mir-7 | NRGN     | 0.62  |
| hsa-mir-7 | NRXN3    | 0.54  |
| hsa-mir-7 | NY-REN-7 | 0.68  |
| hsa-mir-7 | OCA2     | 0.6   |
| hsa-mir-7 | ODZ2     | 0.45  |
| hsa-mir-7 | OLFM3    | 0.56  |
| hsa-mir-7 | OPRK1    | 0.52  |
| hsa-mir-7 | P2RX5    | 0.49  |
| hsa-mir-7 | PAC SIN1 | 0.71  |
| hsa-mir-7 | PAK3     | 0.58  |
| hsa-mir-7 | PCDH11Y  | 0.57  |
| hsa-mir-7 | PCLO     | 0.6   |
| hsa-mir-7 | PCSK2    | 0.55  |
| hsa-mir-7 | PDE2A    | 0.62  |
| hsa-mir-7 | PDYN     | 0.63  |
| hsa-mir-7 | PEG3     | 0.48  |
| hsa-mir-7 | PENK     | 0.38  |
| hsa-mir-7 | PFKFB3   | -0.41 |
| hsa-mir-7 | PGBD5    | 0.51  |
| hsa-mir-7 | PHYHIP   | 0.61  |
| hsa-mir-7 | PLAC2    | 0.54  |
| hsa-mir-7 | PLCXD3   | 0.45  |
| hsa-mir-7 | PNMA3    | 0.59  |
| hsa-mir-7 | PNMA5    | 0.6   |
| hsa-mir-7 | PNOC     | 0.58  |
| hsa-mir-7 | POLI     | -0.26 |
| hsa-mir-7 | PPP2R2C  | 0.67  |
| hsa-mir-7 | PRG2     | 0.52  |
| hsa-mir-7 | PRKCB1   | 0.54  |
| hsa-mir-7 | PRMT8    | 0.56  |
| hsa-mir-7 | PRSS3    | 0.59  |
| hsa-mir-7 | PSMB9    | -0.32 |
| hsa-mir-7 | PTPN5    | 0.65  |

|           |           |       |
|-----------|-----------|-------|
| hsa-mir-7 | PTPRN     | 0.5   |
| hsa-mir-7 | PTPRR     | 0.54  |
| hsa-mir-7 | PVALB     | 0.5   |
| hsa-mir-7 | RAB11FIP4 | 0.62  |
| hsa-mir-7 | RAB3A     | 0.6   |
| hsa-mir-7 | RAB3B     | 0.46  |
| hsa-mir-7 | RASAL1    | 0.58  |
| hsa-mir-7 | RASGEF1A  | 0.42  |
| hsa-mir-7 | RASGRF1   | 0.58  |
| hsa-mir-7 | RASGRF2   | 0.54  |
| hsa-mir-7 | RBM11     | 0.56  |
| hsa-mir-7 | RELL2     | 0.47  |
| hsa-mir-7 | RFC4      | -0.11 |
| hsa-mir-7 | RFPL2     | 0.57  |
| hsa-mir-7 | RGS7      | 0.49  |
| hsa-mir-7 | RHOBTB2   | 0.5   |
| hsa-mir-7 | RICH2     | 0.66  |
| hsa-mir-7 | RIMBP2    | 0.67  |
| hsa-mir-7 | RIMS2     | 0.62  |
| hsa-mir-7 | RPP25     | 0.41  |
| hsa-mir-7 | RPRML     | 0.45  |
| hsa-mir-7 | RTN4R     | 0.57  |
| hsa-mir-7 | RTN4RL1   | 0.64  |
| hsa-mir-7 | RUNDC3A   | 0.6   |
| hsa-mir-7 | RXFP1     | 0.44  |
| hsa-mir-7 | RYR2      | 0.69  |
| hsa-mir-7 | SEMA3D    | 0.39  |
| hsa-mir-7 | SEZ6L2    | 0.37  |
| hsa-mir-7 | SH3GL2    | 0.55  |
| hsa-mir-7 | SH3GL3    | 0.63  |
| hsa-mir-7 | SHANK2    | 0.67  |
| hsa-mir-7 | SLC12A5   | 0.69  |
| hsa-mir-7 | SLC17A6   | 0.51  |
| hsa-mir-7 | SLC17A7   | 0.64  |
| hsa-mir-7 | SLC1A6    | 0.54  |
| hsa-mir-7 | SLC30A3   | 0.64  |
| hsa-mir-7 | SLC32A1   | 0.68  |
| hsa-mir-7 | SLC35F3   | 0.67  |
| hsa-mir-7 | SLC6A15   | 0.5   |
| hsa-mir-7 | SLC8A2    | 0.64  |
| hsa-mir-7 | SLITRK4   | 0.6   |
| hsa-mir-7 | SMPX      | 0.6   |
| hsa-mir-7 | SNAP25    | 0.61  |
| hsa-mir-7 | SNAP91    | 0.58  |
| hsa-mir-7 | SNCA      | 0.56  |
| hsa-mir-7 | SNIP      | 0.59  |
| hsa-mir-7 | SNTG2     | 0.37  |
| hsa-mir-7 | SOHLH1    | 0.73  |
| hsa-mir-7 | SORBS2    | 0.47  |
| hsa-mir-7 | SORCS1    | 0.47  |
| hsa-mir-7 | SST       | 0.55  |
| hsa-mir-7 | SSTR1     | 0.62  |
| hsa-mir-7 | ST8SIA3   | 0.6   |



|             |          |       |
|-------------|----------|-------|
| hsa-mir-7   | STAR     | 0.53  |
| hsa-mir-7   | STK17B   | -0.4  |
| hsa-mir-7   | STK32C   | 0.6   |
| hsa-mir-7   | STMN2    | 0.47  |
| hsa-mir-7   | STX1A    | 0.64  |
| hsa-mir-7   | STXBP5L  | 0.48  |
| hsa-mir-7   | STXBP6   | 0.53  |
| hsa-mir-7   | STYK1    | 0.62  |
| hsa-mir-7   | SULT4A1  | 0.71  |
| hsa-mir-7   | SV2B     | 0.64  |
| hsa-mir-7   | SV2C     | 0.57  |
| hsa-mir-7   | SYN2     | 0.61  |
| hsa-mir-7   | SYNGR3   | 0.58  |
| hsa-mir-7   | SYNPR    | 0.61  |
| hsa-mir-7   | SYT1     | 0.63  |
| hsa-mir-7   | SYT13    | 0.73  |
| hsa-mir-7   | SYT4     | 0.56  |
| hsa-mir-7   | SYT5     | 0.65  |
| hsa-mir-7   | TAC1     | 0.54  |
| hsa-mir-7   | TAC3     | 0.57  |
| hsa-mir-7   | TACSTD1  | 0.46  |
| hsa-mir-7   | TAGLN3   | 0.53  |
| hsa-mir-7   | TCERG1L  | 0.66  |
| hsa-mir-7   | TMEFF2   | 0.46  |
| hsa-mir-7   | TMEM130  | 0.62  |
| hsa-mir-7   | TMEM155  | 0.56  |
| hsa-mir-7   | TMEM16C  | 0.59  |
| hsa-mir-7   | TNRC4    | 0.63  |
| hsa-mir-7   | TPO      | 0.55  |
| hsa-mir-7   | TRAF3IP2 | -0.3  |
| hsa-mir-7   | TSPAN6   | -0.35 |
| hsa-mir-7   | TUBA4A   | 0.53  |
| hsa-mir-7   | VIP      | 0.56  |
| hsa-mir-7   | VSNL1    | 0.63  |
| hsa-mir-7   | VSTM2L   | 0.61  |
| hsa-mir-7   | VWC2     | 0.24  |
| hsa-mir-7   | WBSCR17  | 0.56  |
| hsa-mir-7   | WNT10B   | 0.68  |
| hsa-mir-7   | WSCD2    | 0.65  |
| hsa-mir-7   | ZCCHC12  | 0.6   |
| hsa-mir-7   | ZFAND6   | -0.29 |
| hsa-mir-7   | ZNF215   | 0.39  |
| hsa-mir-758 | C21orf62 | -0.37 |
| hsa-mir-758 | CDH9     | 0.44  |
| hsa-mir-758 | CHRM2    | 0.34  |
| hsa-mir-758 | CLECL1   | -0.46 |
| hsa-mir-758 | CLSTN3   | 0.46  |
| hsa-mir-758 | CYP26B1  | 0.37  |
| hsa-mir-758 | FLJ34047 | 0.44  |
| hsa-mir-758 | FSD1     | 0.46  |
| hsa-mir-758 | GDA      | 0.35  |
| hsa-mir-758 | GLIS1    | 0.32  |
| hsa-mir-758 | HOOK1    | 0.43  |

|             |           |       |
|-------------|-----------|-------|
| hsa-mir-758 | KCNG3     | 0.41  |
| hsa-mir-758 | KIAA1086  | 0.47  |
| hsa-mir-758 | MAPRE3    | 0.13  |
| hsa-mir-758 | MGC5566   | 0.37  |
| hsa-mir-758 | PLAC2     | 0.41  |
| hsa-mir-758 | PRSS1     | 0.43  |
| hsa-mir-758 | PRSS2     | 0.42  |
| hsa-mir-758 | PRSS3     | 0.42  |
| hsa-mir-758 | SMPX      | 0.34  |
| hsa-mir-758 | SYNGR3    | 0.45  |
| hsa-mir-765 | ARHGAP22  | 0.35  |
| hsa-mir-765 | C10orf63  | -0.18 |
| hsa-mir-765 | C9orf47   | 0.59  |
| hsa-mir-765 | CABP7     | 0.46  |
| hsa-mir-765 | CD86      | 0.53  |
| hsa-mir-765 | CFD       | 0.26  |
| hsa-mir-765 | CGB1      | 0.46  |
| hsa-mir-765 | CHI3L2    | 0.06  |
| hsa-mir-765 | COL14A1   | 0.25  |
| hsa-mir-765 | COL1A1    | 0.29  |
| hsa-mir-765 | CTSZ      | 0.32  |
| hsa-mir-765 | CXCL12    | 0.26  |
| hsa-mir-765 | CXCR7     | -0.1  |
| hsa-mir-765 | DMGDH     | -0.19 |
| hsa-mir-765 | FAP       | 0.21  |
| hsa-mir-765 | FLJ13195  | -0.18 |
| hsa-mir-765 | FLJ37543  | -0.19 |
| hsa-mir-765 | FLJ38723  | 0.5   |
| hsa-mir-765 | IFI30     | 0.26  |
| hsa-mir-765 | IGHM      | 0.29  |
| hsa-mir-765 | IGKV1-5   | 0.27  |
| hsa-mir-765 | IL12A     | -0.18 |
| hsa-mir-765 | IL1F10    | 0.54  |
| hsa-mir-765 | IL7R      | 0.3   |
| hsa-mir-765 | IRX5      | 0.27  |
| hsa-mir-765 | KCNE1L    | 0.04  |
| hsa-mir-765 | LHFPL3    | -0.06 |
| hsa-mir-765 | LOC285382 | -0.27 |
| hsa-mir-765 | LRRC36    | -0.18 |
| hsa-mir-765 | MEOX2     | -0.16 |
| hsa-mir-765 | MSI2      | -0.21 |
| hsa-mir-765 | OSTbeta   | 0.15  |
| hsa-mir-765 | PCSK4     | 0.49  |
| hsa-mir-765 | PPM1F     | 0.45  |
| hsa-mir-765 | RPA4      | 0.53  |
| hsa-mir-765 | SAPS1     | 0.59  |
| hsa-mir-765 | ST8SIA5   | -0.17 |
| hsa-mir-765 | VPS18     | 0.56  |
| hsa-mir-765 | ZNF75A    | -0.21 |
| hsa-mir-766 | ACF       | 0.18  |
| hsa-mir-766 | ACSM2B    | 0.15  |
| hsa-mir-766 | ACSM3     | 0.19  |
| hsa-mir-766 | APOA5     | 0.18  |

|             |             |       |
|-------------|-------------|-------|
| hsa-mir-766 | ATAD4       | 0.18  |
| hsa-mir-766 | BMP5        | 0.14  |
| hsa-mir-766 | C18orf2     | 0.22  |
| hsa-mir-766 | C19orf46    | 0.17  |
| hsa-mir-766 | C3orf32     | 0.15  |
| hsa-mir-766 | C4orf7      | 0.05  |
| hsa-mir-766 | C6orf156    | 0.16  |
| hsa-mir-766 | C8A         | 0.18  |
| hsa-mir-766 | CCBE1       | 0.08  |
| hsa-mir-766 | CD163       | -0.16 |
| hsa-mir-766 | CD84        | -0.2  |
| hsa-mir-766 | CDH16       | 0.26  |
| hsa-mir-766 | CEACAM6     | 0.2   |
| hsa-mir-766 | CENTB2      | -0.11 |
| hsa-mir-766 | CLCN3       | -0.25 |
| hsa-mir-766 | CXorf36     | -0.24 |
| hsa-mir-766 | CYP3A7      | 0.04  |
| hsa-mir-766 | KFZp566H082 | 0.26  |
| hsa-mir-766 | DNMT3L      | 0.12  |
| hsa-mir-766 | ENOX2       | -0.18 |
| hsa-mir-766 | ESX1        | 0.19  |
| hsa-mir-766 | FBXL21      | 0.18  |
| hsa-mir-766 | FGB         | 0.17  |
| hsa-mir-766 | FGL1        | 0.15  |
| hsa-mir-766 | FOXA1       | 0.24  |
| hsa-mir-766 | FPRL2       | -0.15 |
| hsa-mir-766 | GAGE1       | 0.14  |
| hsa-mir-766 | IGSF6       | -0.23 |
| hsa-mir-766 | KIAA1909    | 0.18  |
| hsa-mir-766 | KLK11       | 0.21  |
| hsa-mir-766 | KPNA3       | -0.09 |
| hsa-mir-766 | KRTAP1-5    | 0.19  |
| hsa-mir-766 | MAGEA1      | 0.17  |
| hsa-mir-766 | MAT1A       | 0.11  |
| hsa-mir-766 | MS4A7       | -0.16 |
| hsa-mir-766 | MUCL1       | 0.12  |
| hsa-mir-766 | NANOGP1     | 0.15  |
| hsa-mir-766 | NAT8        | 0.19  |
| hsa-mir-766 | NLRC4       | -0.22 |
| hsa-mir-766 | NR1H4       | 0.15  |
| hsa-mir-766 | NUP210L     | 0.17  |
| hsa-mir-766 | OR51B5      | 0.19  |
| hsa-mir-766 | ORM2        | 0.16  |
| hsa-mir-766 | OVOL2       | 0.22  |
| hsa-mir-766 | PCSK9       | 0.17  |
| hsa-mir-766 | PRDM13      | 0.14  |
| hsa-mir-766 | RHEBL1      | 0.17  |
| hsa-mir-766 | SERPINA6    | 0.18  |
| hsa-mir-766 | SERPINA7    | 0.15  |
| hsa-mir-766 | SERPINB2    | 0.18  |
| hsa-mir-766 | SERPINB4    | 0.14  |
| hsa-mir-766 | SIGLEC10    | -0.18 |
| hsa-mir-766 | SIGLEC8     | -0.13 |

|                |          |       |
|----------------|----------|-------|
| hsa-mir-766    | SLC2A2   | 0.15  |
| hsa-mir-766    | SPRR1B   | 0.18  |
| hsa-mir-766    | TERT     | 0.19  |
| hsa-mir-766    | TSPY2    | 0.19  |
| hsa-mir-766    | TYR      | 0.19  |
| hsa-mir-766    | UGT2B11  | 0.2   |
| hsa-mir-766    | UGT2B28  | 0.16  |
| hsa-mir-768-3p | ACTN2    | 0.14  |
| hsa-mir-768-3p | CASC4    | 0.22  |
| hsa-mir-768-3p | CDH16    | -0.22 |
| hsa-mir-768-3p | FGF14    | 0.09  |
| hsa-mir-768-3p | HSPB3    | -0.08 |
| hsa-mir-768-3p | NPAS3    | 0.27  |
| hsa-mir-768-3p | NR0B1    | -0.1  |
| hsa-mir-768-3p | PCDHB6   | 0.2   |
| hsa-mir-768-3p | POSTN    | 0.03  |
| hsa-mir-768-3p | RDM1     | -0.19 |
| hsa-mir-768-3p | RPESP    | -0.11 |
| hsa-mir-768-3p | SEMA3A   | -0.04 |
| hsa-mir-768-3p | SLC1A2   | 0.22  |
| hsa-mir-768-3p | SLC4A4   | 0.24  |
| hsa-mir-768-3p | SMOC1    | -0.02 |
| hsa-mir-768-3p | SPG20    | 0.18  |
| hsa-mir-768-5p | BCAS1    | -0.18 |
| hsa-mir-768-5p | C9orf62  | -0.19 |
| hsa-mir-768-5p | DAZ4     | -0.04 |
| hsa-mir-768-5p | DAZL     | -0.07 |
| hsa-mir-768-5p | FGL2     | 0.03  |
| hsa-mir-768-5p | GLRA3    | -0.09 |
| hsa-mir-768-5p | IRX2     | -0.04 |
| hsa-mir-768-5p | PAQR9    | -0.08 |
| hsa-mir-768-5p | TSPAN15  | -0.24 |
| hsa-mir-768-5p | TUBA1A   | -0.23 |
| hsa-mir-768-5p | TUBA3C   | -0.33 |
| hsa-mir-768-5p | VSNL1    | -0.14 |
| hsa-mir-768-5p | XTP3TPA  | -0.22 |
| hsa-mir-768-5p | ZNF790   | 0.17  |
| hsa-mir-768-5p | ZSWIM7   | -0.21 |
| hsa-mir-769-3p | ARHGAP22 | 0.31  |
| hsa-mir-769-3p | C9orf47  | 0.52  |
| hsa-mir-769-3p | CABP7    | 0.41  |
| hsa-mir-769-3p | CCL18    | 0.27  |
| hsa-mir-769-3p | CD86     | 0.5   |
| hsa-mir-769-3p | CGB1     | 0.39  |
| hsa-mir-769-3p | FLJ38723 | 0.4   |
| hsa-mir-769-3p | IGKV1-5  | 0.22  |
| hsa-mir-769-3p | IL1F10   | 0.46  |
| hsa-mir-769-3p | LY86     | 0.31  |
| hsa-mir-769-3p | PCSK4    | 0.44  |
| hsa-mir-769-3p | PLA2G7   | 0.17  |
| hsa-mir-769-3p | RGS10    | 0.22  |
| hsa-mir-769-3p | RPA4     | 0.43  |
| hsa-mir-769-3p | SAPS1    | 0.52  |

|                |           |       |
|----------------|-----------|-------|
| hsa-mir-769-3p | VPS18     | 0.48  |
| hsa-mir-769-5p | ABLIM2    | 0.66  |
| hsa-mir-769-5p | AMPH      | 0.5   |
| hsa-mir-769-5p | ARHGEF4   | 0.51  |
| hsa-mir-769-5p | BEX4      | 0.51  |
| hsa-mir-769-5p | C1orf115  | 0.6   |
| hsa-mir-769-5p | C1QL3     | 0.67  |
| hsa-mir-769-5p | CACNB1    | 0.7   |
| hsa-mir-769-5p | CAMK2A    | 0.59  |
| hsa-mir-769-5p | CLIP3     | 0.52  |
| hsa-mir-769-5p | CUL3      | 0.57  |
| hsa-mir-769-5p | DCLK1     | 0.55  |
| hsa-mir-769-5p | DLGAP2    | 0.65  |
| hsa-mir-769-5p | DUSP8     | 0.53  |
| hsa-mir-769-5p | EFHA2     | 0.56  |
| hsa-mir-769-5p | GARNL3    | 0.56  |
| hsa-mir-769-5p | GRM1      | 0.6   |
| hsa-mir-769-5p | KIAA0774  | 0.58  |
| hsa-mir-769-5p | MCHR2     | 0.67  |
| hsa-mir-769-5p | MGC39606  | 0.53  |
| hsa-mir-769-5p | NOS1AP    | 0.55  |
| hsa-mir-769-5p | NUP37     | -0.5  |
| hsa-mir-769-5p | PPP2R2C   | 0.55  |
| hsa-mir-769-5p | PPP3CA    | 0.65  |
| hsa-mir-769-5p | PREPL     | 0.59  |
| hsa-mir-769-5p | PSD       | 0.65  |
| hsa-mir-769-5p | RBM11     | 0.46  |
| hsa-mir-769-5p | RFPL1     | 0.61  |
| hsa-mir-769-5p | RUNDC3A   | 0.6   |
| hsa-mir-769-5p | SLC17A7   | 0.64  |
| hsa-mir-769-5p | SV2B      | 0.43  |
| hsa-mir-769-5p | VAMP2     | 0.63  |
| hsa-mir-769-5p | WDR7      | 0.61  |
| hsa-mir-770-5p | C9orf39   | -0.27 |
| hsa-mir-770-5p | CDKN2A    | -0.1  |
| hsa-mir-770-5p | LOC554207 | 0.23  |
| hsa-mir-770-5p | MDC1      | -0.22 |
| hsa-mir-770-5p | RPESP     | 0.16  |
| hsa-mir-801    | ACSM1     | 0.35  |
| hsa-mir-801    | ALAS2     | 0.32  |
| hsa-mir-801    | AMBP      | 0.32  |
| hsa-mir-801    | AMPD1     | 0.44  |
| hsa-mir-801    | ANK2      | -0.42 |
| hsa-mir-801    | ARHGAP5   | -0.31 |
| hsa-mir-801    | C21orf55  | -0.39 |
| hsa-mir-801    | C2orf48   | 0.44  |
| hsa-mir-801    | C2orf54   | 0.14  |
| hsa-mir-801    | C3orf33   | -0.35 |
| hsa-mir-801    | C4BPA     | 0.23  |
| hsa-mir-801    | C9orf47   | 0.42  |
| hsa-mir-801    | CADM2     | -0.29 |
| hsa-mir-801    | CAMK2N2   | 0.25  |
| hsa-mir-801    | CD1B      | 0.39  |

|             |           |       |
|-------------|-----------|-------|
| hsa-mir-801 | CD3D      | 0.32  |
| hsa-mir-801 | CDH16     | 0.37  |
| hsa-mir-801 | CHL1      | -0.36 |
| hsa-mir-801 | CPB2      | 0.4   |
| hsa-mir-801 | CYP3A5    | -0.03 |
| hsa-mir-801 | DAZ4      | 0.14  |
| hsa-mir-801 | DDIT4L    | -0.21 |
| hsa-mir-801 | DERL3     | 0.45  |
| hsa-mir-801 | DLK1      | 0.24  |
| hsa-mir-801 | EIF1AY    | 0.08  |
| hsa-mir-801 | EIF5      | -0.32 |
| hsa-mir-801 | EML5      | -0.34 |
| hsa-mir-801 | EN2       | 0.3   |
| hsa-mir-801 | EPS8L1    | 0.44  |
| hsa-mir-801 | FAM5B     | -0.37 |
| hsa-mir-801 | FGL2      | -0.31 |
| hsa-mir-801 | FLJ21075  | 0.38  |
| hsa-mir-801 | FLJ38723  | 0.4   |
| hsa-mir-801 | FLJ46111  | 0.44  |
| hsa-mir-801 | FOXA1     | 0.29  |
| hsa-mir-801 | FOXG1     | -0.25 |
| hsa-mir-801 | GALC      | -0.38 |
| hsa-mir-801 | GPC3      | 0.33  |
| hsa-mir-801 | GRIK4     | -0.4  |
| hsa-mir-801 | GRM8      | -0.39 |
| hsa-mir-801 | HOOK1     | 0.13  |
| hsa-mir-801 | HPD       | 0.34  |
| hsa-mir-801 | HSD17B2   | 0.28  |
| hsa-mir-801 | HSPA4L    | -0.38 |
| hsa-mir-801 | IGLV2-14  | 0.38  |
| hsa-mir-801 | INSL4     | 0.36  |
| hsa-mir-801 | KBTBD3    | -0.4  |
| hsa-mir-801 | KCNIP4    | -0.29 |
| hsa-mir-801 | KCTD19    | 0.34  |
| hsa-mir-801 | KDR       | -0.31 |
| hsa-mir-801 | KIAA0423  | -0.45 |
| hsa-mir-801 | KIAA1822L | 0.28  |
| hsa-mir-801 | KLHDC1    | -0.4  |
| hsa-mir-801 | KPNA5     | -0.33 |
| hsa-mir-801 | KRT16     | 0.37  |
| hsa-mir-801 | KRT6A     | 0.41  |
| hsa-mir-801 | LCA5      | -0.24 |
| hsa-mir-801 | LCK       | 0.41  |
| hsa-mir-801 | LIG4      | -0.34 |
| hsa-mir-801 | LMO3      | -0.18 |
| hsa-mir-801 | LRP1B     | -0.37 |
| hsa-mir-801 | LRRN3     | -0.26 |
| hsa-mir-801 | LRRTM2    | -0.34 |
| hsa-mir-801 | MAGEA4    | 0.37  |
| hsa-mir-801 | MAGEA5    | 0.43  |
| hsa-mir-801 | MAGEC2    | 0.29  |
| hsa-mir-801 | MANSC1    | -0.39 |
| hsa-mir-801 | NDUFB7    | 0.17  |

|             |         |       |
|-------------|---------|-------|
| hsa-mir-801 | NLRP2   | 0.22  |
| hsa-mir-801 | NNT     | -0.29 |
| hsa-mir-801 | NRCAM   | -0.35 |
| hsa-mir-801 | NUDT8   | 0.32  |
| hsa-mir-801 | OSTbeta | 0.25  |
| hsa-mir-801 | P2RY12  | -0.26 |
| hsa-mir-801 | PAGE2B  | 0.29  |
| hsa-mir-801 | PCDH10  | -0.39 |
| hsa-mir-801 | PCSK4   | 0.47  |
| hsa-mir-801 | PFDN5   | 0.28  |
| hsa-mir-801 | PIK3CB  | -0.38 |
| hsa-mir-801 | PKP2    | 0.25  |
| hsa-mir-801 | PLEKHN1 | 0.35  |
| hsa-mir-801 | POTE15  | 0.37  |
| hsa-mir-801 | PPP2R2B | -0.35 |
| hsa-mir-801 | PRAME   | 0.25  |
| hsa-mir-801 | PRKAR1A | -0.37 |
| hsa-mir-801 | PTPRD   | -0.29 |
| hsa-mir-801 | RAB5A   | -0.42 |
| hsa-mir-801 | RNF6    | -0.37 |
| hsa-mir-801 | RPA4    | 0.48  |
| hsa-mir-801 | RPS6    | 0.22  |
| hsa-mir-801 | SAPS1   | 0.45  |
| hsa-mir-801 | SLITRK3 | -0.23 |
| hsa-mir-801 | SNRK    | -0.38 |
| hsa-mir-801 | SPPL2B  | 0.23  |
| hsa-mir-801 | SPRED1  | -0.28 |
| hsa-mir-801 | SUHW1   | 0.37  |
| hsa-mir-801 | TM4SF5  | 0.41  |
| hsa-mir-801 | TMOD2   | -0.39 |
| hsa-mir-801 | TP53TG3 | 0.24  |
| hsa-mir-801 | TRIM15  | 0.42  |
| hsa-mir-801 | UPP2    | -0.32 |
| hsa-mir-801 | VAMP4   | -0.29 |
| hsa-mir-801 | VPS18   | 0.5   |
| hsa-mir-801 | WASL    | -0.3  |
| hsa-mir-801 | ZFP42   | 0.41  |
| hsa-mir-9   | ABAT    | 0.49  |
| hsa-mir-9   | ABCA13  | -0.48 |
| hsa-mir-9   | ABCA6   | -0.41 |
| hsa-mir-9   | ABI3BP  | -0.34 |
| hsa-mir-9   | ACCN2   | 0.47  |
| hsa-mir-9   | ACP5    | -0.43 |
| hsa-mir-9   | ACSL1   | -0.52 |
| hsa-mir-9   | ACTA2   | -0.33 |
| hsa-mir-9   | ADAMTS1 | -0.42 |
| hsa-mir-9   | ADORA3  | -0.39 |
| hsa-mir-9   | AIM1    | -0.5  |
| hsa-mir-9   | AIM2    | -0.26 |
| hsa-mir-9   | ALOX15B | -0.44 |
| hsa-mir-9   | ALOX5   | -0.5  |
| hsa-mir-9   | AMICA1  | -0.51 |
| hsa-mir-9   | AMPD3   | -0.48 |

|           |          |       |
|-----------|----------|-------|
| hsa-mir-9 | ANTXR2   | -0.49 |
| hsa-mir-9 | ANXA13   | -0.49 |
| hsa-mir-9 | ANXA4    | -0.52 |
| hsa-mir-9 | AOAH     | -0.4  |
| hsa-mir-9 | APOBEC3H | -0.4  |
| hsa-mir-9 | AQP9     | -0.55 |
| hsa-mir-9 | ARC      | 0.29  |
| hsa-mir-9 | ARHGAP18 | -0.46 |
| hsa-mir-9 | ARHGAP24 | -0.43 |
| hsa-mir-9 | ARHGAP30 | -0.45 |
| hsa-mir-9 | ARHGAP9  | -0.44 |
| hsa-mir-9 | ARPC5    | -0.45 |
| hsa-mir-9 | ASAM     | -0.28 |
| hsa-mir-9 | ASCL1    | 0.45  |
| hsa-mir-9 | ASPN     | -0.44 |
| hsa-mir-9 | ATP13A5  | 0.34  |
| hsa-mir-9 | ATP8B4   | -0.4  |
| hsa-mir-9 | B3GNT2   | -0.5  |
| hsa-mir-9 | B4GALNT4 | 0.46  |
| hsa-mir-9 | BAI1     | 0.45  |
| hsa-mir-9 | BATF     | -0.47 |
| hsa-mir-9 | BCAN     | 0.5   |
| hsa-mir-9 | BCHE     | 0.33  |
| hsa-mir-9 | BGN      | -0.42 |
| hsa-mir-9 | BIRC3    | -0.4  |
| hsa-mir-9 | BMP2K    | -0.4  |
| hsa-mir-9 | BNC2     | -0.44 |
| hsa-mir-9 | BSN      | 0.32  |
| hsa-mir-9 | C10orf30 | 0.37  |
| hsa-mir-9 | C10orf59 | -0.43 |
| hsa-mir-9 | C13orf29 | -0.28 |
| hsa-mir-9 | C13orf31 | -0.4  |
| hsa-mir-9 | C13orf33 | -0.39 |
| hsa-mir-9 | C19orf59 | -0.53 |
| hsa-mir-9 | C1orf106 | 0.45  |
| hsa-mir-9 | C1orf162 | -0.45 |
| hsa-mir-9 | C1orf34  | -0.37 |
| hsa-mir-9 | C1orf38  | -0.47 |
| hsa-mir-9 | C1orf61  | 0.49  |
| hsa-mir-9 | C1QA     | -0.39 |
| hsa-mir-9 | C1QB     | -0.41 |
| hsa-mir-9 | C1S      | -0.42 |
| hsa-mir-9 | C3AR1    | -0.47 |
| hsa-mir-9 | C3orf32  | 0.26  |
| hsa-mir-9 | C3orf55  | -0.4  |
| hsa-mir-9 | C3orf64  | -0.4  |
| hsa-mir-9 | C5AR1    | -0.52 |
| hsa-mir-9 | C6orf211 | -0.36 |
| hsa-mir-9 | C7       | -0.38 |
| hsa-mir-9 | C9orf135 | -0.34 |
| hsa-mir-9 | C9orf140 | 0.44  |
| hsa-mir-9 | C9orf95  | -0.47 |
| hsa-mir-9 | CA8      | 0.06  |



|           |          |       |
|-----------|----------|-------|
| hsa-mir-9 | CAMP     | -0.39 |
| hsa-mir-9 | CAPZA1   | -0.36 |
| hsa-mir-9 | CARD6    | -0.45 |
| hsa-mir-9 | CASP5    | -0.48 |
| hsa-mir-9 | CAST     | -0.54 |
| hsa-mir-9 | CATSPER1 | -0.49 |
| hsa-mir-9 | CCL13    | -0.53 |
| hsa-mir-9 | CCL18    | -0.48 |
| hsa-mir-9 | CCL2     | -0.38 |
| hsa-mir-9 | CCL20    | -0.35 |
| hsa-mir-9 | CCL23    | -0.43 |
| hsa-mir-9 | CCL26    | -0.47 |
| hsa-mir-9 | CCL4     | -0.27 |
| hsa-mir-9 | CCL5     | -0.42 |
| hsa-mir-9 | CCL7     | -0.42 |
| hsa-mir-9 | CCL8     | -0.39 |
| hsa-mir-9 | CCR2     | -0.41 |
| hsa-mir-9 | CCR5     | -0.46 |
| hsa-mir-9 | CCR7     | -0.41 |
| hsa-mir-9 | CD109    | -0.51 |
| hsa-mir-9 | CD14     | -0.43 |
| hsa-mir-9 | CD163    | -0.46 |
| hsa-mir-9 | CD2      | -0.43 |
| hsa-mir-9 | CD27     | -0.46 |
| hsa-mir-9 | CD28     | -0.38 |
| hsa-mir-9 | CD33     | -0.4  |
| hsa-mir-9 | CD3G     | -0.28 |
| hsa-mir-9 | CD40     | -0.29 |
| hsa-mir-9 | CD52     | -0.39 |
| hsa-mir-9 | CD70     | -0.25 |
| hsa-mir-9 | CD72     | -0.47 |
| hsa-mir-9 | CD84     | -0.42 |
| hsa-mir-9 | CDH10    | 0.35  |
| hsa-mir-9 | CEACAM4  | -0.55 |
| hsa-mir-9 | CEBPE    | -0.48 |
| hsa-mir-9 | CFD      | -0.47 |
| hsa-mir-9 | CFH      | -0.42 |
| hsa-mir-9 | CFHR3    | -0.42 |
| hsa-mir-9 | CHIT1    | -0.36 |
| hsa-mir-9 | CHST8    | 0.23  |
| hsa-mir-9 | CKB      | 0.54  |
| hsa-mir-9 | CLDN23   | -0.49 |
| hsa-mir-9 | CLEC10A  | -0.56 |
| hsa-mir-9 | CLEC2B   | -0.51 |
| hsa-mir-9 | CLEC4A   | -0.4  |
| hsa-mir-9 | CLEC4D   | -0.4  |
| hsa-mir-9 | CLIC2    | -0.47 |
| hsa-mir-9 | CMKLR1   | -0.49 |
| hsa-mir-9 | CMTM7    | -0.49 |
| hsa-mir-9 | CMTM8    | -0.36 |
| hsa-mir-9 | CNN2     | -0.45 |
| hsa-mir-9 | COL10A1  | -0.49 |
| hsa-mir-9 | COL12A1  | -0.49 |

|           |         |       |
|-----------|---------|-------|
| hsa-mir-9 | COL14A1 | -0.33 |
| hsa-mir-9 | COL15A1 | -0.35 |
| hsa-mir-9 | COL1A1  | -0.48 |
| hsa-mir-9 | COL1A2  | -0.52 |
| hsa-mir-9 | COL3A1  | -0.47 |
| hsa-mir-9 | COL5A1  | -0.45 |
| hsa-mir-9 | COL5A2  | -0.48 |
| hsa-mir-9 | COL6A2  | -0.43 |
| hsa-mir-9 | COL6A3  | -0.58 |
| hsa-mir-9 | COL8A2  | -0.45 |
| hsa-mir-9 | COLEC12 | -0.34 |
| hsa-mir-9 | COPZ2   | -0.46 |
| hsa-mir-9 | CP      | -0.42 |
| hsa-mir-9 | CPA3    | -0.4  |
| hsa-mir-9 | CPD     | -0.46 |
| hsa-mir-9 | CPM     | -0.29 |
| hsa-mir-9 | CRB1    | 0.42  |
| hsa-mir-9 | CREBL2  | -0.48 |
| hsa-mir-9 | CREG1   | -0.4  |
| hsa-mir-9 | CRIP3   | 0.4   |
| hsa-mir-9 | CRTAM   | -0.51 |
| hsa-mir-9 | CSPG5   | 0.48  |
| hsa-mir-9 | CST6    | -0.5  |
| hsa-mir-9 | CSTA    | -0.51 |
| hsa-mir-9 | CTBS    | -0.45 |
| hsa-mir-9 | CTGF    | -0.3  |
| hsa-mir-9 | CTNND2  | 0.35  |
| hsa-mir-9 | CTSC    | -0.46 |
| hsa-mir-9 | CTSD    | -0.36 |
| hsa-mir-9 | CTSK    | -0.4  |
| hsa-mir-9 | CTSZ    | -0.46 |
| hsa-mir-9 | CXCL1   | -0.37 |
| hsa-mir-9 | CXCL12  | -0.48 |
| hsa-mir-9 | CXCL13  | -0.52 |
| hsa-mir-9 | CXCL6   | -0.39 |
| hsa-mir-9 | CXorf21 | -0.38 |
| hsa-mir-9 | CXXC4   | 0.41  |
| hsa-mir-9 | CYP1B1  | -0.49 |
| hsa-mir-9 | DAB2    | -0.52 |
| hsa-mir-9 | DC2     | -0.4  |
| hsa-mir-9 | DCBLD2  | -0.43 |
| hsa-mir-9 | DCI     | 0.38  |
| hsa-mir-9 | DCLK2   | 0.37  |
| hsa-mir-9 | DCN     | -0.42 |
| hsa-mir-9 | DENND2D | -0.46 |
| hsa-mir-9 | DKK1    | -0.42 |
| hsa-mir-9 | DLL1    | 0.39  |
| hsa-mir-9 | DLL3    | 0.43  |
| hsa-mir-9 | DNAJC5B | -0.39 |
| hsa-mir-9 | DOK2    | -0.55 |
| hsa-mir-9 | DPEP2   | -0.44 |
| hsa-mir-9 | DPP6    | 0.37  |
| hsa-mir-9 | DPYD    | -0.45 |

|           |          |       |
|-----------|----------|-------|
| hsa-mir-9 | DSCAM    | 0.43  |
| hsa-mir-9 | DSE      | -0.53 |
| hsa-mir-9 | DUSP1    | -0.44 |
| hsa-mir-9 | DYNLT3   | -0.49 |
| hsa-mir-9 | EBI2     | -0.46 |
| hsa-mir-9 | EDG6     | -0.44 |
| hsa-mir-9 | EMB      | -0.49 |
| hsa-mir-9 | ENDOG    | 0.41  |
| hsa-mir-9 | ENOX2    | -0.42 |
| hsa-mir-9 | EPHB3    | 0.33  |
| hsa-mir-9 | EPN2     | 0.46  |
| hsa-mir-9 | EREG     | -0.37 |
| hsa-mir-9 | F13A1    | -0.59 |
| hsa-mir-9 | FABP4    | -0.41 |
| hsa-mir-9 | FADS1    | 0.34  |
| hsa-mir-9 | FAM105A  | -0.25 |
| hsa-mir-9 | FAM114A1 | -0.55 |
| hsa-mir-9 | FAM20A   | -0.47 |
| hsa-mir-9 | FAM26F   | -0.4  |
| hsa-mir-9 | FAM55C   | -0.45 |
| hsa-mir-9 | FAM69B   | 0.52  |
| hsa-mir-9 | FAP      | -0.54 |
| hsa-mir-9 | FAS      | -0.46 |
| hsa-mir-9 | FBP1     | -0.42 |
| hsa-mir-9 | FBXL16   | 0.34  |
| hsa-mir-9 | FCER1A   | -0.35 |
| hsa-mir-9 | FCGR2A   | -0.44 |
| hsa-mir-9 | FCGR2B   | -0.51 |
| hsa-mir-9 | FCN3     | -0.42 |
| hsa-mir-9 | FGFBP3   | 0.56  |
| hsa-mir-9 | FGL2     | -0.43 |
| hsa-mir-9 | FHL2     | -0.44 |
| hsa-mir-9 | FLJ22662 | -0.55 |
| hsa-mir-9 | FMNL1    | -0.41 |
| hsa-mir-9 | FMO1     | -0.41 |
| hsa-mir-9 | FMO3     | -0.28 |
| hsa-mir-9 | FN1      | -0.39 |
| hsa-mir-9 | FOLR2    | -0.5  |
| hsa-mir-9 | FPRL1    | -0.5  |
| hsa-mir-9 | FPRL2    | -0.47 |
| hsa-mir-9 | FRZB     | -0.25 |
| hsa-mir-9 | FTL      | -0.38 |
| hsa-mir-9 | FUCA1    | -0.44 |
| hsa-mir-9 | FXVD6    | 0.46  |
| hsa-mir-9 | GALNT5   | -0.34 |
| hsa-mir-9 | GATA6    | -0.31 |
| hsa-mir-9 | GBP5     | -0.46 |
| hsa-mir-9 | GCLM     | -0.43 |
| hsa-mir-9 | GCNT1    | -0.56 |
| hsa-mir-9 | GCSH     | 0.44  |
| hsa-mir-9 | GDAP1L1  | 0.42  |
| hsa-mir-9 | GFPT2    | -0.42 |
| hsa-mir-9 | GIMAP4   | -0.44 |

|           |          |       |
|-----------|----------|-------|
| hsa-mir-9 | GIMAP6   | -0.39 |
| hsa-mir-9 | GJA4     | -0.31 |
| hsa-mir-9 | GJB2     | -0.34 |
| hsa-mir-9 | GLCCI1   | 0.45  |
| hsa-mir-9 | GLT8D4   | -0.56 |
| hsa-mir-9 | GNG4     | 0.51  |
| hsa-mir-9 | GNS      | -0.52 |
| hsa-mir-9 | GPNMB    | -0.43 |
| hsa-mir-9 | GPR171   | -0.43 |
| hsa-mir-9 | GPR56    | 0.51  |
| hsa-mir-9 | GPR84    | -0.44 |
| hsa-mir-9 | GPT2     | 0.44  |
| hsa-mir-9 | GZMB     | -0.47 |
| hsa-mir-9 | GZMH     | -0.43 |
| hsa-mir-9 | GZMK     | -0.5  |
| hsa-mir-9 | H2AFJ    | -0.43 |
| hsa-mir-9 | HCST     | -0.43 |
| hsa-mir-9 | HES5     | 0.39  |
| hsa-mir-9 | HES6     | 0.48  |
| hsa-mir-9 | HGF      | -0.37 |
| hsa-mir-9 | HK3      | -0.52 |
| hsa-mir-9 | HLA-DQB1 | -0.4  |
| hsa-mir-9 | HTR2B    | -0.41 |
| hsa-mir-9 | HTRA4    | -0.39 |
| hsa-mir-9 | IFI16    | -0.36 |
| hsa-mir-9 | IGF1     | -0.43 |
| hsa-mir-9 | IGFBP6   | -0.42 |
| hsa-mir-9 | IGSF6    | -0.3  |
| hsa-mir-9 | IKIP     | -0.41 |
| hsa-mir-9 | IL10     | -0.5  |
| hsa-mir-9 | IL10RA   | -0.47 |
| hsa-mir-9 | IL15     | -0.42 |
| hsa-mir-9 | IL18R1   | -0.63 |
| hsa-mir-9 | IL18RAP  | -0.47 |
| hsa-mir-9 | IL1R1    | -0.61 |
| hsa-mir-9 | IL1R2    | -0.49 |
| hsa-mir-9 | IL2RA    | -0.53 |
| hsa-mir-9 | IL33     | -0.2  |
| hsa-mir-9 | IL6      | -0.39 |
| hsa-mir-9 | IL7R     | -0.55 |
| hsa-mir-9 | IRAK3    | -0.49 |
| hsa-mir-9 | ISLR     | -0.48 |
| hsa-mir-9 | ITGA4    | -0.42 |
| hsa-mir-9 | ITGBL1   | -0.48 |
| hsa-mir-9 | JUNB     | -0.33 |
| hsa-mir-9 | KCNE3    | -0.39 |
| hsa-mir-9 | KCNJ15   | -0.58 |
| hsa-mir-9 | KCNJ16   | 0.19  |
| hsa-mir-9 | KCNMB1   | -0.4  |
| hsa-mir-9 | KCTD9    | -0.51 |
| hsa-mir-9 | KIAA0649 | 0.32  |
| hsa-mir-9 | KIAA1045 | 0.25  |
| hsa-mir-9 | KLHL25   | 0.41  |

|           |           |       |
|-----------|-----------|-------|
| hsa-mir-9 | KLRB1     | -0.47 |
| hsa-mir-9 | LACTB     | -0.4  |
| hsa-mir-9 | LAMB1     | -0.46 |
| hsa-mir-9 | LAYN      | -0.52 |
| hsa-mir-9 | LCP1      | -0.43 |
| hsa-mir-9 | LGALS8    | -0.48 |
| hsa-mir-9 | LILRB2    | -0.49 |
| hsa-mir-9 | LILRB3    | -0.5  |
| hsa-mir-9 | LILRB5    | -0.47 |
| hsa-mir-9 | LMOD1     | -0.22 |
| hsa-mir-9 | LOC202459 | -0.41 |
| hsa-mir-9 | LOC285382 | 0.36  |
| hsa-mir-9 | LOC388135 | 0.44  |
| hsa-mir-9 | LOC388419 | 0.37  |
| hsa-mir-9 | LOC389073 | 0.33  |
| hsa-mir-9 | LOC493869 | -0.47 |
| hsa-mir-9 | LOX       | -0.47 |
| hsa-mir-9 | LOXL1     | -0.36 |
| hsa-mir-9 | LPXN      | -0.4  |
| hsa-mir-9 | LRRC25    | -0.49 |
| hsa-mir-9 | LRRC8C    | -0.33 |
| hsa-mir-9 | LRRN1     | 0.42  |
| hsa-mir-9 | LRRTM3    | 0.37  |
| hsa-mir-9 | LTB       | -0.37 |
| hsa-mir-9 | LTBP2     | -0.51 |
| hsa-mir-9 | LTC4S     | -0.34 |
| hsa-mir-9 | LUM       | -0.49 |
| hsa-mir-9 | LY96      | -0.46 |
| hsa-mir-9 | LYVE1     | -0.57 |
| hsa-mir-9 | LYZ       | -0.4  |
| hsa-mir-9 | MAFB      | -0.47 |
| hsa-mir-9 | MAGED4B   | 0.41  |
| hsa-mir-9 | MAMDC2    | -0.32 |
| hsa-mir-9 | MAN1A1    | -0.54 |
| hsa-mir-9 | MAN2A1    | -0.5  |
| hsa-mir-9 | MANEAL    | 0.45  |
| hsa-mir-9 | MAP3K8    | -0.5  |
| hsa-mir-9 | MAPK13    | -0.42 |
| hsa-mir-9 | MARCO     | -0.54 |
| hsa-mir-9 | MARK1     | 0.4   |
| hsa-mir-9 | MCFD2     | -0.55 |
| hsa-mir-9 | MCTP2     | -0.36 |
| hsa-mir-9 | MDFIC     | -0.51 |
| hsa-mir-9 | MFAP5     | -0.39 |
| hsa-mir-9 | MGC14376  | -0.51 |
| hsa-mir-9 | MGC24103  | -0.42 |
| hsa-mir-9 | MICALCL   | -0.49 |
| hsa-mir-9 | MLKL      | -0.49 |
| hsa-mir-9 | MME       | -0.32 |
| hsa-mir-9 | MMP1      | -0.36 |
| hsa-mir-9 | MMP11     | -0.42 |
| hsa-mir-9 | MMP19     | -0.49 |
| hsa-mir-9 | MMP7      | -0.42 |

|           |         |       |
|-----------|---------|-------|
| hsa-mir-9 | MNDA    | -0.42 |
| hsa-mir-9 | MPEG1   | -0.47 |
| hsa-mir-9 | MPPED2  | 0.36  |
| hsa-mir-9 | MRO     | -0.33 |
| hsa-mir-9 | MS4A4A  | -0.41 |
| hsa-mir-9 | MS4A6A  | -0.42 |
| hsa-mir-9 | MS4A7   | -0.44 |
| hsa-mir-9 | MSR1    | -0.43 |
| hsa-mir-9 | MYCN    | 0.54  |
| hsa-mir-9 | MYEF2   | 0.42  |
| hsa-mir-9 | MYL9    | -0.52 |
| hsa-mir-9 | MYLK    | -0.4  |
| hsa-mir-9 | MYO10   | 0.47  |
| hsa-mir-9 | NCAN    | 0.33  |
| hsa-mir-9 | NCF2    | -0.48 |
| hsa-mir-9 | NDRG2   | 0.44  |
| hsa-mir-9 | NEU4    | 0.5   |
| hsa-mir-9 | NFIA    | 0.38  |
| hsa-mir-9 | NFKBIZ  | -0.43 |
| hsa-mir-9 | NKG7    | -0.46 |
| hsa-mir-9 | NLGN1   | 0.39  |
| hsa-mir-9 | NLGN3   | 0.5   |
| hsa-mir-9 | NLRC4   | -0.47 |
| hsa-mir-9 | NLRP3   | -0.42 |
| hsa-mir-9 | NOD2    | -0.49 |
| hsa-mir-9 | NPC2    | -0.43 |
| hsa-mir-9 | NT5DC1  | -0.38 |
| hsa-mir-9 | NXPH1   | 0.37  |
| hsa-mir-9 | OBFC2A  | -0.52 |
| hsa-mir-9 | OLFML2B | -0.59 |
| hsa-mir-9 | OLIG1   | 0.51  |
| hsa-mir-9 | OLIG2   | 0.47  |
| hsa-mir-9 | OSTF1   | -0.5  |
| hsa-mir-9 | P4HA2   | -0.61 |
| hsa-mir-9 | P4HA3   | -0.5  |
| hsa-mir-9 | PAPSS2  | -0.36 |
| hsa-mir-9 | PAWR    | -0.27 |
| hsa-mir-9 | PCOLCE  | -0.43 |
| hsa-mir-9 | PCSK1   | -0.33 |
| hsa-mir-9 | PHF21B  | 0.39  |
| hsa-mir-9 | PHLDB2  | -0.44 |
| hsa-mir-9 | PHLPP   | 0.44  |
| hsa-mir-9 | PIK3AP1 | -0.43 |
| hsa-mir-9 | PITX2   | 0     |
| hsa-mir-9 | PLA2G2A | -0.24 |
| hsa-mir-9 | PLAG1   | -0.32 |
| hsa-mir-9 | PLAGL1  | -0.29 |
| hsa-mir-9 | PLAUR   | -0.48 |
| hsa-mir-9 | PLB1    | -0.46 |
| hsa-mir-9 | PLCG2   | -0.36 |
| hsa-mir-9 | PLD1    | -0.35 |
| hsa-mir-9 | PLEK    | -0.41 |
| hsa-mir-9 | PLXDC2  | -0.48 |

|           |          |       |
|-----------|----------|-------|
| hsa-mir-9 | PLXNC1   | -0.31 |
| hsa-mir-9 | PLXND1   | -0.41 |
| hsa-mir-9 | PMFBP1   | -0.33 |
| hsa-mir-9 | POSTN    | -0.37 |
| hsa-mir-9 | PPFIBP1  | -0.35 |
| hsa-mir-9 | PRF1     | -0.4  |
| hsa-mir-9 | PROCR    | -0.43 |
| hsa-mir-9 | PROM1    | 0.2   |
| hsa-mir-9 | PSAT1    | 0.43  |
| hsa-mir-9 | PSCDBP   | -0.44 |
| hsa-mir-9 | PTGDR    | -0.39 |
| hsa-mir-9 | PTGER4   | -0.46 |
| hsa-mir-9 | PTPLAD2  | -0.49 |
| hsa-mir-9 | PTPN2    | -0.48 |
| hsa-mir-9 | PTPRC    | -0.42 |
| hsa-mir-9 | PTPRZ1   | 0.42  |
| hsa-mir-9 | PUNC     | 0.42  |
| hsa-mir-9 | RAB27A   | -0.49 |
| hsa-mir-9 | RABGAP1L | -0.49 |
| hsa-mir-9 | RAP1B    | -0.28 |
| hsa-mir-9 | RARRES1  | -0.41 |
| hsa-mir-9 | RARRES2  | -0.31 |
| hsa-mir-9 | RCN3     | -0.48 |
| hsa-mir-9 | RETN     | -0.48 |
| hsa-mir-9 | Rgr      | -0.39 |
| hsa-mir-9 | RGS18    | -0.46 |
| hsa-mir-9 | RGS2     | -0.38 |
| hsa-mir-9 | RHOH     | -0.37 |
| hsa-mir-9 | RIN2     | -0.28 |
| hsa-mir-9 | RLBP1    | 0.32  |
| hsa-mir-9 | RNASE1   | -0.48 |
| hsa-mir-9 | RNASE2   | -0.42 |
| hsa-mir-9 | RNF144B  | -0.5  |
| hsa-mir-9 | RNF149   | -0.49 |
| hsa-mir-9 | RPESP    | -0.26 |
| hsa-mir-9 | RPL39L   | -0.12 |
| hsa-mir-9 | RUNX2    | -0.6  |
| hsa-mir-9 | S100A11  | -0.49 |
| hsa-mir-9 | S100A12  | -0.37 |
| hsa-mir-9 | S100A4   | -0.46 |
| hsa-mir-9 | S100A8   | -0.4  |
| hsa-mir-9 | SALL2    | 0.57  |
| hsa-mir-9 | SALL3    | 0.47  |
| hsa-mir-9 | SAT1     | -0.46 |
| hsa-mir-9 | SCG3     | 0.43  |
| hsa-mir-9 | SCIN     | -0.31 |
| hsa-mir-9 | SCPEP1   | -0.54 |
| hsa-mir-9 | SEC24D   | -0.54 |
| hsa-mir-9 | SEMA3C   | -0.31 |
| hsa-mir-9 | SEMA6A   | 0.39  |
| hsa-mir-9 | SERPINB8 | -0.37 |
| hsa-mir-9 | SERPINE1 | -0.43 |
| hsa-mir-9 | SEZ6L    | 0.48  |

|           |          |       |
|-----------|----------|-------|
| hsa-mir-9 | SFT2D2   | -0.47 |
| hsa-mir-9 | SIGLEC10 | -0.45 |
| hsa-mir-9 | SIGLEC11 | -0.32 |
| hsa-mir-9 | SLA      | -0.48 |
| hsa-mir-9 | SLAMF1   | -0.44 |
| hsa-mir-9 | SLAMF8   | -0.55 |
| hsa-mir-9 | SLC11A1  | -0.51 |
| hsa-mir-9 | SLC16A10 | -0.39 |
| hsa-mir-9 | SLC16A9  | 0.39  |
| hsa-mir-9 | SLC22A16 | -0.39 |
| hsa-mir-9 | SLC24A3  | 0.44  |
| hsa-mir-9 | SLC24A5  | 0.53  |
| hsa-mir-9 | SLC31A2  | -0.4  |
| hsa-mir-9 | SLC9A9   | -0.31 |
| hsa-mir-9 | SLCO2B1  | -0.35 |
| hsa-mir-9 | SLFN11   | -0.21 |
| hsa-mir-9 | SLIT1    | 0.39  |
| hsa-mir-9 | SMOC2    | -0.33 |
| hsa-mir-9 | SNAI2    | -0.49 |
| hsa-mir-9 | SOX2     | 0.55  |
| hsa-mir-9 | SOX8     | 0.5   |
| hsa-mir-9 | SPHK1    | -0.4  |
| hsa-mir-9 | SPON2    | -0.3  |
| hsa-mir-9 | SRGN     | -0.42 |
| hsa-mir-9 | STAB1    | -0.5  |
| hsa-mir-9 | STEAP1   | -0.4  |
| hsa-mir-9 | STOM     | -0.39 |
| hsa-mir-9 | STX7     | -0.39 |
| hsa-mir-9 | SVIL     | -0.43 |
| hsa-mir-9 | SYK      | -0.46 |
| hsa-mir-9 | TBC1D1   | -0.31 |
| hsa-mir-9 | TBC1D8   | -0.32 |
| hsa-mir-9 | TBC1D8B  | -0.51 |
| hsa-mir-9 | TDO2     | -0.44 |
| hsa-mir-9 | TFEC     | -0.38 |
| hsa-mir-9 | TGFBI    | -0.49 |
| hsa-mir-9 | TGFBR2   | -0.52 |
| hsa-mir-9 | THBD     | -0.49 |
| hsa-mir-9 | THBS1    | -0.57 |
| hsa-mir-9 | THNSL2   | -0.16 |
| hsa-mir-9 | TIMD4    | -0.42 |
| hsa-mir-9 | TLR2     | -0.42 |
| hsa-mir-9 | TLR5     | -0.41 |
| hsa-mir-9 | TLR8     | -0.44 |
| hsa-mir-9 | TM4SF19  | -0.24 |
| hsa-mir-9 | TMED2    | -0.21 |
| hsa-mir-9 | TMEM118  | 0.41  |
| hsa-mir-9 | TMEM121  | 0.44  |
| hsa-mir-9 | TMEM145  | 0.49  |
| hsa-mir-9 | TMEM166  | -0.4  |
| hsa-mir-9 | TMEM176B | -0.39 |
| hsa-mir-9 | TMEM64   | -0.38 |
| hsa-mir-9 | TMSB10   | -0.39 |



|            |           |       |
|------------|-----------|-------|
| hsa-mir-9  | TNFAIP8   | -0.49 |
| hsa-mir-9  | TNFAIP8L3 | -0.45 |
| hsa-mir-9  | TNFSF10   | -0.43 |
| hsa-mir-9  | TNFSF4    | -0.52 |
| hsa-mir-9  | TPBG      | -0.43 |
| hsa-mir-9  | TRIB2     | 0.3   |
| hsa-mir-9  | TRIM38    | -0.42 |
| hsa-mir-9  | TRPC6     | -0.21 |
| hsa-mir-9  | TRPM2     | -0.35 |
| hsa-mir-9  | TSPAN2    | -0.4  |
| hsa-mir-9  | TSPAN3    | 0.47  |
| hsa-mir-9  | TTYH1     | 0.53  |
| hsa-mir-9  | TUBB2B    | 0.4   |
| hsa-mir-9  | TWIST1    | -0.42 |
| hsa-mir-9  | UAP1      | -0.41 |
| hsa-mir-9  | UNQ9368   | -0.35 |
| hsa-mir-9  | VAMP8     | -0.4  |
| hsa-mir-9  | VDR       | -0.6  |
| hsa-mir-9  | VMO1      | -0.39 |
| hsa-mir-9  | VNN1      | -0.35 |
| hsa-mir-9  | VNN2      | -0.45 |
| hsa-mir-9  | VSTM3     | -0.44 |
| hsa-mir-9  | WBSCR27   | -0.28 |
| hsa-mir-9  | WIPF1     | -0.53 |
| hsa-mir-9  | WISP1     | -0.44 |
| hsa-mir-9  | WNT2      | -0.38 |
| hsa-mir-9  | WSCD1     | 0.42  |
| hsa-mir-9  | XCL2      | -0.37 |
| hsa-mir-9  | ZBTB5     | 0.4   |
| hsa-mir-9  | ZCCHC6    | -0.54 |
| hsa-mir-9  | ZDHHC22   | 0.5   |
| hsa-mir-9  | ZNF219    | 0.4   |
| hsa-mir-9  | ZNF462    | 0.39  |
| hsa-mir-9  | ZNF629    | 0.36  |
| hsa-mir-9* | ABAT      | 0.46  |
| hsa-mir-9* | ABCA13    | -0.45 |
| hsa-mir-9* | ABCA3     | 0.38  |
| hsa-mir-9* | ABCA6     | -0.4  |
| hsa-mir-9* | ABI3BP    | -0.34 |
| hsa-mir-9* | ACCN2     | 0.44  |
| hsa-mir-9* | ACSL1     | -0.52 |
| hsa-mir-9* | ADAMTS1   | -0.38 |
| hsa-mir-9* | AGT       | 0.41  |
| hsa-mir-9* | AIM1      | -0.47 |
| hsa-mir-9* | ALDH1A3   | -0.3  |
| hsa-mir-9* | ALPK1     | -0.46 |
| hsa-mir-9* | ALPK2     | -0.3  |
| hsa-mir-9* | AMICA1    | -0.46 |
| hsa-mir-9* | AMPD3     | -0.43 |
| hsa-mir-9* | ANKRD5    | -0.29 |
| hsa-mir-9* | ANPEP     | -0.33 |
| hsa-mir-9* | ANTXR2    | -0.48 |
| hsa-mir-9* | ANXA13    | -0.44 |

|            |          |       |
|------------|----------|-------|
| hsa-mir-9* | ANXA4    | -0.46 |
| hsa-mir-9* | AQP4     | 0.09  |
| hsa-mir-9* | AQP9     | -0.49 |
| hsa-mir-9* | ARC      | 0.35  |
| hsa-mir-9* | AREG     | -0.33 |
| hsa-mir-9* | ARHGAP24 | -0.45 |
| hsa-mir-9* | ARPC5    | -0.43 |
| hsa-mir-9* | ARRDC4   | -0.17 |
| hsa-mir-9* | ASAM     | -0.29 |
| hsa-mir-9* | ASCL1    | 0.43  |
| hsa-mir-9* | ASPN     | -0.4  |
| hsa-mir-9* | ATP8B4   | -0.39 |
| hsa-mir-9* | B3GAT1   | 0.4   |
| hsa-mir-9* | B3GNT2   | -0.49 |
| hsa-mir-9* | B4GALNT4 | 0.48  |
| hsa-mir-9* | BAI1     | 0.42  |
| hsa-mir-9* | BAI3     | 0.31  |
| hsa-mir-9* | BCAN     | 0.53  |
| hsa-mir-9* | BGN      | -0.38 |
| hsa-mir-9* | BMP7     | 0.41  |
| hsa-mir-9* | BNC2     | -0.46 |
| hsa-mir-9* | C10orf59 | -0.43 |
| hsa-mir-9* | C13orf31 | -0.39 |
| hsa-mir-9* | C18orf51 | 0.43  |
| hsa-mir-9* | C19orf59 | -0.44 |
| hsa-mir-9* | C1orf106 | 0.43  |
| hsa-mir-9* | C1orf38  | -0.42 |
| hsa-mir-9* | C1orf61  | 0.52  |
| hsa-mir-9* | C20orf58 | 0.38  |
| hsa-mir-9* | C3AR1    | -0.42 |
| hsa-mir-9* | C3orf39  | 0.43  |
| hsa-mir-9* | C3orf64  | -0.43 |
| hsa-mir-9* | C4orf18  | -0.29 |
| hsa-mir-9* | C4orf7   | -0.13 |
| hsa-mir-9* | C6orf211 | -0.41 |
| hsa-mir-9* | C8orf46  | 0.25  |
| hsa-mir-9* | C9orf95  | -0.45 |
| hsa-mir-9* | CA14     | 0.34  |
| hsa-mir-9* | CACNG1   | 0.26  |
| hsa-mir-9* | CADM2    | 0.26  |
| hsa-mir-9* | CAMP     | -0.32 |
| hsa-mir-9* | CAPZA1   | -0.34 |
| hsa-mir-9* | CARD6    | -0.38 |
| hsa-mir-9* | CCDC28B  | 0.5   |
| hsa-mir-9* | CCL13    | -0.48 |
| hsa-mir-9* | CCL18    | -0.45 |
| hsa-mir-9* | CCL20    | -0.27 |
| hsa-mir-9* | CCL23    | -0.37 |
| hsa-mir-9* | CCL26    | -0.41 |
| hsa-mir-9* | CCL7     | -0.38 |
| hsa-mir-9* | CCL8     | -0.35 |
| hsa-mir-9* | CCND2    | 0.37  |
| hsa-mir-9* | CCR2     | -0.36 |

|            |            |       |
|------------|------------|-------|
| hsa-mir-9* | CCR7       | -0.34 |
| hsa-mir-9* | CD109      | -0.48 |
| hsa-mir-9* | CD163      | -0.38 |
| hsa-mir-9* | CD2        | -0.38 |
| hsa-mir-9* | CD28       | -0.38 |
| hsa-mir-9* | CD3G       | -0.24 |
| hsa-mir-9* | CD70       | -0.25 |
| hsa-mir-9* | CD72       | -0.44 |
| hsa-mir-9* | CD84       | -0.39 |
| hsa-mir-9* | CDH10      | 0.29  |
| hsa-mir-9* | CDH11      | -0.25 |
| hsa-mir-9* | CDKN2AIPNL | 0.39  |
| hsa-mir-9* | CEACAM4    | -0.49 |
| hsa-mir-9* | CFD        | -0.41 |
| hsa-mir-9* | CHST9      | 0.33  |
| hsa-mir-9* | CLDN23     | -0.44 |
| hsa-mir-9* | CLEC2B     | -0.43 |
| hsa-mir-9* | CLEC4A     | -0.35 |
| hsa-mir-9* | CLEC4D     | -0.32 |
| hsa-mir-9* | CLEC4E     | -0.34 |
| hsa-mir-9* | CLIC2      | -0.44 |
| hsa-mir-9* | CLRN3      | -0.33 |
| hsa-mir-9* | CMKLR1     | -0.47 |
| hsa-mir-9* | CMTM7      | -0.44 |
| hsa-mir-9* | CMTM8      | -0.35 |
| hsa-mir-9* | CNN2       | -0.42 |
| hsa-mir-9* | COL10A1    | -0.52 |
| hsa-mir-9* | COL12A1    | -0.48 |
| hsa-mir-9* | COL13A1    | -0.34 |
| hsa-mir-9* | COL14A1    | -0.35 |
| hsa-mir-9* | COL1A1     | -0.42 |
| hsa-mir-9* | COL1A2     | -0.51 |
| hsa-mir-9* | COL21A1    | -0.34 |
| hsa-mir-9* | COL24A1    | -0.38 |
| hsa-mir-9* | COL3A1     | -0.41 |
| hsa-mir-9* | COL5A1     | -0.46 |
| hsa-mir-9* | COL6A1     | -0.36 |
| hsa-mir-9* | COL6A2     | -0.4  |
| hsa-mir-9* | COL6A3     | -0.53 |
| hsa-mir-9* | COL8A2     | -0.42 |
| hsa-mir-9* | COL9A1     | 0.27  |
| hsa-mir-9* | CPD        | -0.42 |
| hsa-mir-9* | CPZ        | -0.28 |
| hsa-mir-9* | CRB1       | 0.37  |
| hsa-mir-9* | CREBL2     | -0.45 |
| hsa-mir-9* | CRTAM      | -0.48 |
| hsa-mir-9* | CSPG5      | 0.49  |
| hsa-mir-9* | CST6       | -0.46 |
| hsa-mir-9* | CSTA       | -0.45 |
| hsa-mir-9* | CTGF       | -0.3  |
| hsa-mir-9* | CTHRC1     | -0.3  |
| hsa-mir-9* | CTNND2     | 0.35  |
| hsa-mir-9* | CTSC       | -0.42 |

|            |          |       |
|------------|----------|-------|
| hsa-mir-9* | CXCL1    | -0.31 |
| hsa-mir-9* | CXCL12   | -0.47 |
| hsa-mir-9* | CXCL13   | -0.47 |
| hsa-mir-9* | CXorf6   | 0.37  |
| hsa-mir-9* | CXXC4    | 0.41  |
| hsa-mir-9* | CYB5R4   | -0.23 |
| hsa-mir-9* | CYP1B1   | -0.45 |
| hsa-mir-9* | CYP26A1  | -0.16 |
| hsa-mir-9* | DAB2     | -0.47 |
| hsa-mir-9* | DCBLD2   | -0.44 |
| hsa-mir-9* | DCLK2    | 0.37  |
| hsa-mir-9* | DCN      | -0.36 |
| hsa-mir-9* | DIO3     | -0.21 |
| hsa-mir-9* | DKK1     | -0.42 |
| hsa-mir-9* | DNER     | 0.22  |
| hsa-mir-9* | DOK2     | -0.47 |
| hsa-mir-9* | DPF1     | 0.42  |
| hsa-mir-9* | DPP6     | 0.39  |
| hsa-mir-9* | DPT      | -0.44 |
| hsa-mir-9* | DPYSL2   | 0     |
| hsa-mir-9* | EBF1     | -0.25 |
| hsa-mir-9* | EGFL6    | -0.43 |
| hsa-mir-9* | ELL2     | -0.29 |
| hsa-mir-9* | EPHA3    | -0.28 |
| hsa-mir-9* | EPHB3    | 0.36  |
| hsa-mir-9* | EPN2     | 0.47  |
| hsa-mir-9* | EREG     | -0.34 |
| hsa-mir-9* | F13A1    | -0.53 |
| hsa-mir-9* | FADS2    | 0.37  |
| hsa-mir-9* | FAM107A  | 0.14  |
| hsa-mir-9* | FAM123A  | 0.07  |
| hsa-mir-9* | FAM20A   | -0.41 |
| hsa-mir-9* | FAM38B   | -0.2  |
| hsa-mir-9* | FAM69B   | 0.5   |
| hsa-mir-9* | FAP      | -0.48 |
| hsa-mir-9* | FAS      | -0.4  |
| hsa-mir-9* | FGFBP3   | 0.5   |
| hsa-mir-9* | FGL2     | -0.41 |
| hsa-mir-9* | FHL1     | 0.31  |
| hsa-mir-9* | FHL2     | -0.48 |
| hsa-mir-9* | FLJ22662 | -0.5  |
| hsa-mir-9* | FMN2     | 0.29  |
| hsa-mir-9* | FMO1     | -0.43 |
| hsa-mir-9* | FOLR2    | -0.44 |
| hsa-mir-9* | FPRL1    | -0.45 |
| hsa-mir-9* | FPRL2    | -0.44 |
| hsa-mir-9* | FXVD6    | 0.49  |
| hsa-mir-9* | GALNT5   | -0.38 |
| hsa-mir-9* | GATM     | 0.22  |
| hsa-mir-9* | GBP5     | -0.4  |
| hsa-mir-9* | GCNT1    | -0.53 |
| hsa-mir-9* | GCSH     | 0.41  |
| hsa-mir-9* | GFPT2    | -0.41 |

|            |           |       |
|------------|-----------|-------|
| hsa-mir-9* | GLDC      | 0.26  |
| hsa-mir-9* | GLT8D2    | -0.51 |
| hsa-mir-9* | GLT8D4    | -0.54 |
| hsa-mir-9* | GLUL      | -0.2  |
| hsa-mir-9* | GNG4      | 0.43  |
| hsa-mir-9* | GNG7      | 0.33  |
| hsa-mir-9* | GPNMB     | -0.4  |
| hsa-mir-9* | GPR124    | -0.21 |
| hsa-mir-9* | GPR34     | -0.33 |
| hsa-mir-9* | GPR37     | -0.14 |
| hsa-mir-9* | GPR56     | 0.47  |
| hsa-mir-9* | GZMB      | -0.43 |
| hsa-mir-9* | GZMK      | -0.48 |
| hsa-mir-9* | HEPACAM   | 0.13  |
| hsa-mir-9* | HES6      | 0.47  |
| hsa-mir-9* | HGF       | -0.41 |
| hsa-mir-9* | HHAT      | -0.29 |
| hsa-mir-9* | HK3       | -0.46 |
| hsa-mir-9* | HTRA4     | -0.37 |
| hsa-mir-9* | IFITM1    | -0.17 |
| hsa-mir-9* | IGF1      | -0.43 |
| hsa-mir-9* | IGFBP6    | -0.39 |
| hsa-mir-9* | IL17D     | 0.4   |
| hsa-mir-9* | IL18R1    | -0.62 |
| hsa-mir-9* | IL18RAP   | -0.42 |
| hsa-mir-9* | IL1R1     | -0.54 |
| hsa-mir-9* | IL1R2     | -0.42 |
| hsa-mir-9* | IL22RA1   | 0.1   |
| hsa-mir-9* | IL2RA     | -0.48 |
| hsa-mir-9* | IL7R      | -0.47 |
| hsa-mir-9* | IL8       | -0.17 |
| hsa-mir-9* | INHBA     | -0.37 |
| hsa-mir-9* | IRAK3     | -0.47 |
| hsa-mir-9* | ISLR      | -0.42 |
| hsa-mir-9* | ITGA11    | -0.39 |
| hsa-mir-9* | ITGB1     | -0.39 |
| hsa-mir-9* | ITGBL1    | -0.42 |
| hsa-mir-9* | KCNJ15    | -0.52 |
| hsa-mir-9* | KCNJ16    | 0.25  |
| hsa-mir-9* | KCNQ2     | 0.43  |
| hsa-mir-9* | KCTD9     | -0.52 |
| hsa-mir-9* | KIAA0888  | 0.17  |
| hsa-mir-9* | KIAA1276  | 0.19  |
| hsa-mir-9* | KITLG     | -0.38 |
| hsa-mir-9* | KLRB1     | -0.42 |
| hsa-mir-9* | KLRD1     | -0.29 |
| hsa-mir-9* | LAMB1     | -0.44 |
| hsa-mir-9* | LAYN      | -0.48 |
| hsa-mir-9* | LHFPL3    | 0.16  |
| hsa-mir-9* | LILRB5    | -0.43 |
| hsa-mir-9* | LMO1      | 0.34  |
| hsa-mir-9* | LOC285382 | 0.31  |
| hsa-mir-9* | LOC388419 | 0.4   |

|            |           |       |
|------------|-----------|-------|
| hsa-mir-9* | LOC389073 | 0.3   |
| hsa-mir-9* | LOC493869 | -0.41 |
| hsa-mir-9* | LOXL1     | -0.35 |
| hsa-mir-9* | LRIG3     | -0.33 |
| hsa-mir-9* | LRRN2     | 0.33  |
| hsa-mir-9* | LRRTM3    | 0.3   |
| hsa-mir-9* | LTBP1     | -0.37 |
| hsa-mir-9* | LTBP2     | -0.45 |
| hsa-mir-9* | LUM       | -0.45 |
| hsa-mir-9* | LUZP2     | 0.32  |
| hsa-mir-9* | LYVE1     | -0.5  |
| hsa-mir-9* | MAFB      | -0.41 |
| hsa-mir-9* | MAN1A1    | -0.51 |
| hsa-mir-9* | MAN2A1    | -0.44 |
| hsa-mir-9* | MANEAL    | 0.43  |
| hsa-mir-9* | MAP2      | 0.23  |
| hsa-mir-9* | MAP3K8    | -0.45 |
| hsa-mir-9* | MARCO     | -0.48 |
| hsa-mir-9* | MARK1     | 0.36  |
| hsa-mir-9* | MCFD2     | -0.53 |
| hsa-mir-9* | MCTP2     | -0.37 |
| hsa-mir-9* | METRN     | 0.45  |
| hsa-mir-9* | MFAP2     | -0.24 |
| hsa-mir-9* | MFAP5     | -0.35 |
| hsa-mir-9* | MGC16075  | -0.19 |
| hsa-mir-9* | MGC24103  | -0.43 |
| hsa-mir-9* | MGC33846  | 0.39  |
| hsa-mir-9* | MGC39715  | 0.16  |
| hsa-mir-9* | MGC42105  | 0.33  |
| hsa-mir-9* | MGC87042  | -0.32 |
| hsa-mir-9* | MGST1     | -0.29 |
| hsa-mir-9* | MICALCL   | -0.5  |
| hsa-mir-9* | MLKL      | -0.46 |
| hsa-mir-9* | MMD2      | 0.26  |
| hsa-mir-9* | MME       | -0.32 |
| hsa-mir-9* | MMP23B    | -0.11 |
| hsa-mir-9* | MNDA      | -0.41 |
| hsa-mir-9* | MOCOS     | -0.08 |
| hsa-mir-9* | MS4A7     | -0.41 |
| hsa-mir-9* | MYLK      | -0.39 |
| hsa-mir-9* | MYO10     | 0.47  |
| hsa-mir-9* | MYT1      | 0.23  |
| hsa-mir-9* | NCALD     | 0.29  |
| hsa-mir-9* | NCAN      | 0.32  |
| hsa-mir-9* | NCF2      | -0.41 |
| hsa-mir-9* | NEU4      | 0.44  |
| hsa-mir-9* | NKX2-2    | 0.26  |
| hsa-mir-9* | NLGN3     | 0.49  |
| hsa-mir-9* | NOL4      | 0.16  |
| hsa-mir-9* | NPAS3     | 0.27  |
| hsa-mir-9* | NQO1      | -0.32 |
| hsa-mir-9* | NXPH1     | 0.32  |
| hsa-mir-9* | OBFC2A    | -0.49 |

|            |              |       |
|------------|--------------|-------|
| hsa-mir-9* | OLFML2B      | -0.53 |
| hsa-mir-9* | OLIG1        | 0.53  |
| hsa-mir-9* | OLIG2        | 0.48  |
| hsa-mir-9* | OSR1         | -0.16 |
| hsa-mir-9* | P4HA2        | -0.6  |
| hsa-mir-9* | PACRG        | 0.06  |
| hsa-mir-9* | PANX1        | -0.37 |
| hsa-mir-9* | PCOLCE       | -0.41 |
| hsa-mir-9* | PCSK1        | -0.31 |
| hsa-mir-9* | PDE9A        | 0.34  |
| hsa-mir-9* | PERP         | -0.23 |
| hsa-mir-9* | PHACTR2      | -0.28 |
| hsa-mir-9* | PHF21B       | 0.38  |
| hsa-mir-9* | PHLDB2       | -0.43 |
| hsa-mir-9* | PKD2L1       | -0.35 |
| hsa-mir-9* | PLD1         | -0.34 |
| hsa-mir-9* | PLD5         | 0.04  |
| hsa-mir-9* | PLXDC2       | -0.45 |
| hsa-mir-9* | PMAIP1       | -0.31 |
| hsa-mir-9* | PMP2         | 0.11  |
| hsa-mir-9* | PNMA2        | 0.18  |
| hsa-mir-9* | POSTN        | -0.3  |
| hsa-mir-9* | PPFIBP1      | -0.33 |
| hsa-mir-9* | PPP2R2B      | 0.18  |
| hsa-mir-9* | PQLC3        | -0.42 |
| hsa-mir-9* | PRELID2      | -0.32 |
| hsa-mir-9* | PROCR        | -0.37 |
| hsa-mir-9* | PROM1        | 0.21  |
| hsa-mir-9* | PSD2         | 0.34  |
| hsa-mir-9* | PTGER2       | -0.26 |
| hsa-mir-9* | PTGER4       | -0.42 |
| hsa-mir-9* | PTGES        | -0.24 |
| hsa-mir-9* | PTPLAD2      | -0.48 |
| hsa-mir-9* | PTPRZ1       | 0.45  |
| hsa-mir-9* | RAB27A       | -0.47 |
| hsa-mir-9* | RABGAP1L     | -0.46 |
| hsa-mir-9* | RAGE         | 0.29  |
| hsa-mir-9* | RAI14        | -0.44 |
| hsa-mir-9* | RARRES1      | -0.43 |
| hsa-mir-9* | RCN3         | -0.39 |
| hsa-mir-9* | RGS17        | -0.3  |
| hsa-mir-9* | RHOA         | 0.01  |
| hsa-mir-9* | RIN2         | -0.24 |
| hsa-mir-9* | RIT2         | 0.09  |
| hsa-mir-9* | RLBP1        | 0.35  |
| hsa-mir-9* | RNASE1       | -0.44 |
| hsa-mir-9* | RNF149       | -0.45 |
| hsa-mir-9* | RNF217       | -0.43 |
| hsa-mir-9* | RP6-213H19.1 | -0.31 |
| hsa-mir-9* | RPESP        | -0.3  |
| hsa-mir-9* | RUNX2        | -0.6  |
| hsa-mir-9* | RUNX3        | -0.32 |
| hsa-mir-9* | S100A8       | -0.31 |

|            |          |       |
|------------|----------|-------|
| hsa-mir-9* | SALL2    | 0.55  |
| hsa-mir-9* | SALL3    | 0.47  |
| hsa-mir-9* | SAMD3    | -0.34 |
| hsa-mir-9* | SCG3     | 0.41  |
| hsa-mir-9* | SCHIP1   | 0.39  |
| hsa-mir-9* | SCPEP1   | -0.51 |
| hsa-mir-9* | SDC1     | -0.34 |
| hsa-mir-9* | SEC24D   | -0.51 |
| hsa-mir-9* | SELE     | -0.3  |
| hsa-mir-9* | SEMA3C   | -0.36 |
| hsa-mir-9* | SEMA6A   | 0.42  |
| hsa-mir-9* | SERPINE1 | -0.37 |
| hsa-mir-9* | SEZ6L    | 0.44  |
| hsa-mir-9* | SFRP2    | -0.3  |
| hsa-mir-9* | SH3PXD2A | -0.37 |
| hsa-mir-9* | SHD      | 0.35  |
| hsa-mir-9* | SIGLEC1  | -0.38 |
| hsa-mir-9* | SLA      | -0.44 |
| hsa-mir-9* | SLAMF8   | -0.49 |
| hsa-mir-9* | SLC11A1  | -0.43 |
| hsa-mir-9* | SLC16A10 | -0.35 |
| hsa-mir-9* | SLC24A3  | 0.41  |
| hsa-mir-9* | SLC25A23 | 0.38  |
| hsa-mir-9* | SLC27A5  | 0.31  |
| hsa-mir-9* | SLC31A2  | -0.39 |
| hsa-mir-9* | SLC35F1  | 0.23  |
| hsa-mir-9* | SLC6A1   | 0.19  |
| hsa-mir-9* | SLIT1    | 0.37  |
| hsa-mir-9* | SMARCD3  | 0.41  |
| hsa-mir-9* | SMOC2    | -0.32 |
| hsa-mir-9* | SNAI2    | -0.44 |
| hsa-mir-9* | SORBS1   | 0.01  |
| hsa-mir-9* | SOX2     | 0.56  |
| hsa-mir-9* | SOX8     | 0.5   |
| hsa-mir-9* | SOX9     | 0.41  |
| hsa-mir-9* | SPHK1    | -0.36 |
| hsa-mir-9* | SPINK5   | 0.26  |
| hsa-mir-9* | SPON2    | -0.28 |
| hsa-mir-9* | STS-1    | -0.37 |
| hsa-mir-9* | STX7     | -0.4  |
| hsa-mir-9* | SULT1B1  | -0.43 |
| hsa-mir-9* | SVIL     | -0.42 |
| hsa-mir-9* | SYK      | -0.41 |
| hsa-mir-9* | SYTL2    | -0.28 |
| hsa-mir-9* | TBC1D8B  | -0.56 |
| hsa-mir-9* | TDO2     | -0.41 |
| hsa-mir-9* | TFAP2C   | -0.17 |
| hsa-mir-9* | TFEC     | -0.35 |
| hsa-mir-9* | TGFBI    | -0.43 |
| hsa-mir-9* | TGFBR2   | -0.5  |
| hsa-mir-9* | THBD     | -0.44 |
| hsa-mir-9* | THBS1    | -0.52 |
| hsa-mir-9* | TM4SF19  | -0.21 |



|            |          |       |
|------------|----------|-------|
| hsa-mir-9* | TM9SF3   | -0.31 |
| hsa-mir-9* | TMEM145  | 0.46  |
| hsa-mir-9* | TMEM166  | -0.39 |
| hsa-mir-9* | TMEM176B | -0.35 |
| hsa-mir-9* | TMEM26   | -0.41 |
| hsa-mir-9* | TNFAIP8  | -0.44 |
| hsa-mir-9* | TNFSF10  | -0.39 |
| hsa-mir-9* | TNFSF4   | -0.51 |
| hsa-mir-9* | TNIP3    | -0.44 |
| hsa-mir-9* | TPBG     | -0.39 |
| hsa-mir-9* | TPM1     | -0.31 |
| hsa-mir-9* | TRAF4    | 0.41  |
| hsa-mir-9* | TRH      | -0.21 |
| hsa-mir-9* | TSPAN2   | -0.4  |
| hsa-mir-9* | TSPAN3   | 0.43  |
| hsa-mir-9* | TTYH1    | 0.54  |
| hsa-mir-9* | TUBB2B   | 0.42  |
| hsa-mir-9* | TWIST1   | -0.38 |
| hsa-mir-9* | USP12    | -0.42 |
| hsa-mir-9* | VDR      | -0.57 |
| hsa-mir-9* | VEGFC    | -0.36 |
| hsa-mir-9* | VNN1     | -0.31 |
| hsa-mir-9* | VNN2     | -0.38 |
| hsa-mir-9* | WASF3    | 0.28  |
| hsa-mir-9* | WIPF1    | -0.48 |
| hsa-mir-9* | WISP1    | -0.33 |
| hsa-mir-9* | WNT5B    | -0.1  |
| hsa-mir-9* | WSCD1    | 0.43  |
| hsa-mir-9* | ZNF428   | 0.39  |
| hsa-mir-9* | ZNF711   | 0.32  |
| hsa-mir-9* | ZNF74    | 0.42  |
| hsa-mir-92 | AADAACL1 | -0.54 |
| hsa-mir-92 | ACSL5    | -0.4  |
| hsa-mir-92 | AIFM3    | -0.45 |
| hsa-mir-92 | BDNF     | -0.3  |
| hsa-mir-92 | BIN1     | -0.41 |
| hsa-mir-92 | C11orf82 | 0.47  |
| hsa-mir-92 | C13orf3  | 0.49  |
| hsa-mir-92 | C18orf54 | 0.51  |
| hsa-mir-92 | C5orf13  | 0.44  |
| hsa-mir-92 | C6orf167 | 0.46  |
| hsa-mir-92 | CADPS2   | -0.4  |
| hsa-mir-92 | CCNB1    | 0.42  |
| hsa-mir-92 | CCNB2    | 0.47  |
| hsa-mir-92 | CCNE2    | 0.41  |
| hsa-mir-92 | CDC6     | 0.45  |
| hsa-mir-92 | CENPK    | 0.42  |
| hsa-mir-92 | CKAP2    | 0.46  |
| hsa-mir-92 | CREG2    | -0.36 |
| hsa-mir-92 | CYB561   | -0.46 |
| hsa-mir-92 | DEF6     | -0.32 |
| hsa-mir-92 | DEPDC1B  | 0.5   |
| hsa-mir-92 | DKK3     | -0.46 |

|            |           |       |
|------------|-----------|-------|
| hsa-mir-92 | DLG7      | 0.49  |
| hsa-mir-92 | DNA2L     | 0.47  |
| hsa-mir-92 | EMX1      | -0.28 |
| hsa-mir-92 | ESCO2     | 0.48  |
| hsa-mir-92 | FAM54A    | 0.44  |
| hsa-mir-92 | FBXO5     | 0.5   |
| hsa-mir-92 | FLJ21438  | -0.28 |
| hsa-mir-92 | GAA       | -0.27 |
| hsa-mir-92 | GLT1D1    | -0.35 |
| hsa-mir-92 | HAND2     | 0.41  |
| hsa-mir-92 | HHATL     | -0.3  |
| hsa-mir-92 | HOXD3     | 0.43  |
| hsa-mir-92 | HRASLS3   | -0.42 |
| hsa-mir-92 | HSD11B1   | -0.43 |
| hsa-mir-92 | IL17RA    | -0.28 |
| hsa-mir-92 | IMPA2     | -0.26 |
| hsa-mir-92 | INSM1     | 0.38  |
| hsa-mir-92 | IRF5      | -0.34 |
| hsa-mir-92 | KIAA0513  | -0.47 |
| hsa-mir-92 | KIF15     | 0.51  |
| hsa-mir-92 | KIF18A    | 0.45  |
| hsa-mir-92 | LGI1      | -0.4  |
| hsa-mir-92 | LIMA1     | 0.44  |
| hsa-mir-92 | LRMP      | -0.36 |
| hsa-mir-92 | MAD2L1    | 0.44  |
| hsa-mir-92 | MAL2      | -0.3  |
| hsa-mir-92 | MELK      | 0.43  |
| hsa-mir-92 | MEX3A     | 0.52  |
| hsa-mir-92 | MLF1IP    | 0.47  |
| hsa-mir-92 | MT1E      | -0.44 |
| hsa-mir-92 | NBLA00301 | 0.34  |
| hsa-mir-92 | NDC80     | 0.48  |
| hsa-mir-92 | NEIL3     | 0.49  |
| hsa-mir-92 | NKX3-2    | 0.32  |
| hsa-mir-92 | NUF2      | 0.49  |
| hsa-mir-92 | P2RY2     | -0.39 |
| hsa-mir-92 | PAOX      | -0.49 |
| hsa-mir-92 | PLCXD3    | -0.43 |
| hsa-mir-92 | POU4F1    | 0.38  |
| hsa-mir-92 | PRICKLE2  | -0.36 |
| hsa-mir-92 | PRKCD     | -0.46 |
| hsa-mir-92 | PRNP      | -0.52 |
| hsa-mir-92 | RAB11FIP5 | -0.46 |
| hsa-mir-92 | RBM11     | -0.36 |
| hsa-mir-92 | RFC5      | 0.42  |
| hsa-mir-92 | RRM2      | 0.44  |
| hsa-mir-92 | SELPLG    | -0.4  |
| hsa-mir-92 | SLC13A3   | -0.43 |
| hsa-mir-92 | SLC17A6   | -0.02 |
| hsa-mir-92 | SLC7A8    | -0.46 |
| hsa-mir-92 | SMAD4     | 0.43  |
| hsa-mir-92 | SNPH      | -0.44 |
| hsa-mir-92 | SOX11     | 0.49  |

|             |           |       |
|-------------|-----------|-------|
| hsa-mir-92  | SOX4      | 0.5   |
| hsa-mir-92  | SPINT2    | -0.4  |
| hsa-mir-92  | SPOCK2    | -0.4  |
| hsa-mir-92  | SYT13     | -0.2  |
| hsa-mir-92  | TMCO4     | -0.34 |
| hsa-mir-92  | TMPO      | 0.49  |
| hsa-mir-92  | TMSL8     | 0.38  |
| hsa-mir-92  | TOP2A     | 0.5   |
| hsa-mir-92  | TRMT5     | 0.46  |
| hsa-mir-92  | TTC7A     | -0.3  |
| hsa-mir-92  | TTK       | 0.5   |
| hsa-mir-92  | VSNL1     | -0.36 |
| hsa-mir-92  | WFS1      | -0.47 |
| hsa-mir-92  | ZNF140    | 0.39  |
| hsa-mir-92  | ZNF300    | 0.58  |
| hsa-mir-92b | AASS      | 0.49  |
| hsa-mir-92b | ACOT7     | -0.48 |
| hsa-mir-92b | ACPL2     | 0.29  |
| hsa-mir-92b | ADH4      | -0.32 |
| hsa-mir-92b | AFF2      | -0.31 |
| hsa-mir-92b | ALDH1A3   | -0.35 |
| hsa-mir-92b | ALDH1L1   | 0.39  |
| hsa-mir-92b | ALDH3A2   | 0.42  |
| hsa-mir-92b | ANK2      | 0.38  |
| hsa-mir-92b | ANKFN1    | 0.51  |
| hsa-mir-92b | ANKRD38   | -0.35 |
| hsa-mir-92b | AQP4      | 0.47  |
| hsa-mir-92b | AR        | 0.39  |
| hsa-mir-92b | ARHGEF10L | 0.4   |
| hsa-mir-92b | ARHGEF6   | 0.48  |
| hsa-mir-92b | ATF7IP2   | -0.36 |
| hsa-mir-92b | ATP6V0A4  | -0.28 |
| hsa-mir-92b | BASP1     | -0.47 |
| hsa-mir-92b | BBS1      | 0.38  |
| hsa-mir-92b | BDKRB1    | -0.35 |
| hsa-mir-92b | BMPR1B    | 0.44  |
| hsa-mir-92b | BOK       | -0.47 |
| hsa-mir-92b | BTBD16    | -0.3  |
| hsa-mir-92b | C10orf63  | 0.52  |
| hsa-mir-92b | C10orf65  | 0.4   |
| hsa-mir-92b | C10orf79  | 0.41  |
| hsa-mir-92b | C11orf9   | -0.45 |
| hsa-mir-92b | C12orf54  | 0.3   |
| hsa-mir-92b | C14orf152 | 0.45  |
| hsa-mir-92b | C18orf2   | -0.37 |
| hsa-mir-92b | C1orf192  | 0.37  |
| hsa-mir-92b | C1orf59   | -0.37 |
| hsa-mir-92b | C1orf88   | 0.48  |
| hsa-mir-92b | C1QTNF5   | 0.44  |
| hsa-mir-92b | C21orf34  | 0.37  |
| hsa-mir-92b | C21orf62  | 0.48  |
| hsa-mir-92b | C3orf15   | 0.41  |
| hsa-mir-92b | C5orf33   | 0.44  |

|             |          |       |
|-------------|----------|-------|
| hsa-mir-92b | C6orf105 | -0.41 |
| hsa-mir-92b | C7orf16  | -0.3  |
| hsa-mir-92b | C9orf98  | 0.46  |
| hsa-mir-92b | CA3      | 0.34  |
| hsa-mir-92b | CABYR    | -0.41 |
| hsa-mir-92b | CACHD1   | 0.42  |
| hsa-mir-92b | CAPN6    | -0.36 |
| hsa-mir-92b | CASC1    | 0.44  |
| hsa-mir-92b | CCDC40   | 0.36  |
| hsa-mir-92b | CD163L1  | -0.29 |
| hsa-mir-92b | CDC42EP4 | 0.34  |
| hsa-mir-92b | CDH18    | -0.34 |
| hsa-mir-92b | CDKN2A   | -0.14 |
| hsa-mir-92b | CHST9    | 0.52  |
| hsa-mir-92b | CLCA2    | -0.43 |
| hsa-mir-92b | CLEC4G   | -0.42 |
| hsa-mir-92b | CNTNAP2  | -0.43 |
| hsa-mir-92b | COL12A1  | -0.22 |
| hsa-mir-92b | CORO2A   | -0.43 |
| hsa-mir-92b | CRISPLD1 | 0.45  |
| hsa-mir-92b | CROT     | 0.38  |
| hsa-mir-92b | CTNND2   | 0.38  |
| hsa-mir-92b | CYP26B1  | -0.43 |
| hsa-mir-92b | DBX2     | 0.38  |
| hsa-mir-92b | DCDC5    | 0.38  |
| hsa-mir-92b | DDEFL1   | 0.41  |
| hsa-mir-92b | DDR1     | 0.49  |
| hsa-mir-92b | DENND2A  | 0.39  |
| hsa-mir-92b | DLEC1    | 0.43  |
| hsa-mir-92b | DMRT2    | -0.35 |
| hsa-mir-92b | DNAH7    | 0.44  |
| hsa-mir-92b | DNASE2B  | 0.38  |
| hsa-mir-92b | DOCK7    | 0.56  |
| hsa-mir-92b | DOK5     | 0.45  |
| hsa-mir-92b | DOK6     | -0.32 |
| hsa-mir-92b | DYX1C1   | 0.41  |
| hsa-mir-92b | ECM2     | 0.45  |
| hsa-mir-92b | EDNRB    | 0.42  |
| hsa-mir-92b | EFEMP1   | 0.39  |
| hsa-mir-92b | EFHC1    | 0.46  |
| hsa-mir-92b | EGFR     | 0.47  |
| hsa-mir-92b | ELOVL2   | 0.38  |
| hsa-mir-92b | F3       | 0.42  |
| hsa-mir-92b | FAM38B   | -0.36 |
| hsa-mir-92b | FAM70A   | 0.41  |
| hsa-mir-92b | FBLN2    | -0.38 |
| hsa-mir-92b | FGF13    | -0.4  |
| hsa-mir-92b | FLJ14213 | 0.48  |
| hsa-mir-92b | FLJ31438 | 0.36  |
| hsa-mir-92b | FLJ33790 | -0.38 |
| hsa-mir-92b | FLJ34047 | -0.49 |
| hsa-mir-92b | FLJ40298 | 0.33  |
| hsa-mir-92b | GABRB3   | -0.39 |

|             |             |       |
|-------------|-------------|-------|
| hsa-mir-92b | GJB1        | -0.43 |
| hsa-mir-92b | GLI2        | 0.35  |
| hsa-mir-92b | GRAMD3      | 0.41  |
| hsa-mir-92b | GSG1L       | 0.36  |
| hsa-mir-92b | HEPACAM     | 0.5   |
| hsa-mir-92b | HMGCLL1     | -0.38 |
| hsa-mir-92b | HOOK1       | -0.46 |
| hsa-mir-92b | HPRT1       | -0.46 |
| hsa-mir-92b | HSPB3       | -0.38 |
| hsa-mir-92b | ID4         | 0.54  |
| hsa-mir-92b | IFT140      | 0.38  |
| hsa-mir-92b | IGSF5       | 0.34  |
| hsa-mir-92b | IL12A       | 0.27  |
| hsa-mir-92b | IL17RD      | 0.42  |
| hsa-mir-92b | INHBB       | 0.41  |
| hsa-mir-92b | INPP5F      | -0.44 |
| hsa-mir-92b | INSL5       | 0.43  |
| hsa-mir-92b | IQCH        | 0.42  |
| hsa-mir-92b | IQUB        | 0.46  |
| hsa-mir-92b | ITGB8       | 0.49  |
| hsa-mir-92b | JAM2        | 0.48  |
| hsa-mir-92b | KATNAL2     | 0.27  |
| hsa-mir-92b | KCNJ12      | -0.46 |
| hsa-mir-92b | KCNK12      | -0.48 |
| hsa-mir-92b | KCNN2       | 0.39  |
| hsa-mir-92b | KIAA1086    | -0.42 |
| hsa-mir-92b | KIAA1345    | 0.45  |
| hsa-mir-92b | KIAA1505    | 0.42  |
| hsa-mir-92b | KIAA1913    | -0.37 |
| hsa-mir-92b | KLHDC8A     | 0.43  |
| hsa-mir-92b | KNDC1       | 0.09  |
| hsa-mir-92b | LFNG        | 0.42  |
| hsa-mir-92b | LINCR       | 0.38  |
| hsa-mir-92b | LIPG        | 0.42  |
| hsa-mir-92b | 22NC03-75B3 | -0.5  |
| hsa-mir-92b | LRRC3B      | 0.16  |
| hsa-mir-92b | LRRC46      | 0.41  |
| hsa-mir-92b | LRRC48      | 0.49  |
| hsa-mir-92b | MAGEC2      | -0.22 |
| hsa-mir-92b | MAK         | 0.36  |
| hsa-mir-92b | MAL         | -0.39 |
| hsa-mir-92b | MATK        | -0.48 |
| hsa-mir-92b | MEOX2       | 0.4   |
| hsa-mir-92b | MSTN        | 0.36  |
| hsa-mir-92b | MSX2        | -0.38 |
| hsa-mir-92b | NEFL        | -0.4  |
| hsa-mir-92b | NEFM        | -0.41 |
| hsa-mir-92b | NEK11       | 0.51  |
| hsa-mir-92b | NMB         | 0.49  |
| hsa-mir-92b | NOTCH2      | 0.41  |
| hsa-mir-92b | NPNT        | 0.34  |
| hsa-mir-92b | NPTX2       | -0.38 |
| hsa-mir-92b | NR0B1       | -0.35 |

|             |             |       |
|-------------|-------------|-------|
| hsa-mir-92b | OTP         | 0.43  |
| hsa-mir-92b | P2RY1       | 0.34  |
| hsa-mir-92b | PACRG       | 0.4   |
| hsa-mir-92b | PARD3B      | 0.39  |
| hsa-mir-92b | PCSK6       | -0.41 |
| hsa-mir-92b | PHKG1       | 0.4   |
| hsa-mir-92b | PLA1A       | -0.44 |
| hsa-mir-92b | PLCD1       | 0.34  |
| hsa-mir-92b | POLI        | 0.34  |
| hsa-mir-92b | PON2        | 0.34  |
| hsa-mir-92b | POPDC3      | -0.49 |
| hsa-mir-92b | PPFIA1      | 0.36  |
| hsa-mir-92b | PPIL6       | 0.39  |
| hsa-mir-92b | PPM1F       | -0.46 |
| hsa-mir-92b | PRDM5       | 0.37  |
| hsa-mir-92b | PRMT3       | 0.41  |
| hsa-mir-92b | PRSS1       | -0.45 |
| hsa-mir-92b | PRSS2       | -0.47 |
| hsa-mir-92b | PRSS3       | -0.45 |
| hsa-mir-92b | RAVER2      | 0.4   |
| hsa-mir-92b | RDX         | 0.45  |
| hsa-mir-92b | REG1B       | 0.3   |
| hsa-mir-92b | REPS2       | -0.39 |
| hsa-mir-92b | RFPL1       | -0.37 |
| hsa-mir-92b | RFTN2       | 0.43  |
| hsa-mir-92b | RFX2        | 0.53  |
| hsa-mir-92b | RFX4        | 0.56  |
| hsa-mir-92b | RGMA        | 0.48  |
| hsa-mir-92b | RHPN2       | 0.45  |
| hsa-mir-92b | RNF128      | -0.35 |
| hsa-mir-92b | ROBO2       | 0.43  |
| hsa-mir-92b | RP4-692D3.1 | 0.45  |
| hsa-mir-92b | RPP25       | -0.52 |
| hsa-mir-92b | RSHL3       | 0.41  |
| hsa-mir-92b | RTBDN       | 0.37  |
| hsa-mir-92b | S100A2      | 0.47  |
| hsa-mir-92b | SEMA3A      | -0.19 |
| hsa-mir-92b | SEMA3C      | -0.36 |
| hsa-mir-92b | SERPINI2    | 0.46  |
| hsa-mir-92b | SFRP2       | -0.36 |
| hsa-mir-92b | SGCD        | -0.4  |
| hsa-mir-92b | SGEF        | 0.49  |
| hsa-mir-92b | SH3BP5      | -0.4  |
| hsa-mir-92b | SH3GL3      | -0.45 |
| hsa-mir-92b | SLC15A2     | 0.44  |
| hsa-mir-92b | SLC16A4     | 0.44  |
| hsa-mir-92b | SLC27A2     | -0.46 |
| hsa-mir-92b | SLC47A2     | 0.41  |
| hsa-mir-92b | SLC4A4      | 0.4   |
| hsa-mir-92b | SLC6A15     | -0.49 |
| hsa-mir-92b | SMO         | 0.36  |
| hsa-mir-92b | SNCA        | -0.4  |
| hsa-mir-92b | SNCAIP      | 0.49  |

|             |          |       |
|-------------|----------|-------|
| hsa-mir-92b | SNTB1    | 0.43  |
| hsa-mir-92b | SOX9     | 0.46  |
| hsa-mir-92b | SPAG1    | 0.46  |
| hsa-mir-92b | SPINK5   | -0.38 |
| hsa-mir-92b | SSFA2    | 0.37  |
| hsa-mir-92b | STK33    | 0.47  |
| hsa-mir-92b | STXBP6   | -0.48 |
| hsa-mir-92b | SUMF2    | 0.45  |
| hsa-mir-92b | SYTL4    | 0.45  |
| hsa-mir-92b | TEKT1    | 0.43  |
| hsa-mir-92b | TGFB2    | 0.4   |
| hsa-mir-92b | THY1     | -0.43 |
| hsa-mir-92b | TIMP3    | 0.18  |
| hsa-mir-92b | TMEM16D  | -0.45 |
| hsa-mir-92b | TMEM46   | -0.47 |
| hsa-mir-92b | TMEM63A  | -0.39 |
| hsa-mir-92b | TMEM67   | 0.52  |
| hsa-mir-92b | TMOD4    | 0.55  |
| hsa-mir-92b | TNFRSF19 | 0.45  |
| hsa-mir-92b | TP53TG3  | -0.37 |
| hsa-mir-92b | TRIM47   | 0.42  |
| hsa-mir-92b | TSPAN19  | -0.33 |
| hsa-mir-92b | TSPAN8   | -0.4  |
| hsa-mir-92b | TSPYL5   | -0.31 |
| hsa-mir-92b | TTC30A   | 0.42  |
| hsa-mir-92b | TTC30B   | 0.49  |
| hsa-mir-92b | TUSC3    | -0.41 |
| hsa-mir-92b | USMG5    | -0.41 |
| hsa-mir-92b | VCAM1    | 0.41  |
| hsa-mir-92b | WDR16    | 0.33  |
| hsa-mir-92b | WDR49    | 0.43  |
| hsa-mir-92b | WDR78    | 0.52  |
| hsa-mir-92b | YIPF7    | 0.46  |
| hsa-mir-92b | ZFP2     | 0.35  |
| hsa-mir-92b | ZNF396   | 0.46  |
| hsa-mir-92b | ZNF558   | 0.41  |
| hsa-mir-92b | ZNF772   | 0.39  |
| hsa-mir-93  | ACOT4    | -0.45 |
| hsa-mir-93  | ALDH1A1  | -0.36 |
| hsa-mir-93  | ANKRD29  | -0.44 |
| hsa-mir-93  | AOF2     | 0.47  |
| hsa-mir-93  | ASPM     | 0.61  |
| hsa-mir-93  | ATAD2    | 0.54  |
| hsa-mir-93  | ATAD5    | 0.6   |
| hsa-mir-93  | BHLHB3   | -0.4  |
| hsa-mir-93  | BIRC5    | 0.59  |
| hsa-mir-93  | BLVRB    | -0.41 |
| hsa-mir-93  | BUB1     | 0.6   |
| hsa-mir-93  | BUB1B    | 0.59  |
| hsa-mir-93  | C11orf82 | 0.61  |
| hsa-mir-93  | C13orf3  | 0.61  |
| hsa-mir-93  | C15orf42 | 0.58  |
| hsa-mir-93  | C16orf59 | 0.5   |

|            |             |       |
|------------|-------------|-------|
| hsa-mir-93 | C18orf54    | 0.61  |
| hsa-mir-93 | C19orf57    | 0.51  |
| hsa-mir-93 | C1orf106    | 0.56  |
| hsa-mir-93 | C4orf18     | -0.32 |
| hsa-mir-93 | C5orf34     | 0.46  |
| hsa-mir-93 | C6orf1      | -0.33 |
| hsa-mir-93 | C6orf167    | 0.58  |
| hsa-mir-93 | C6orf173    | 0.41  |
| hsa-mir-93 | CAMK2N1     | -0.52 |
| hsa-mir-93 | CASC5       | 0.55  |
| hsa-mir-93 | CBX7        | -0.6  |
| hsa-mir-93 | CCDC138     | 0.47  |
| hsa-mir-93 | CCDC5       | 0.53  |
| hsa-mir-93 | CCNA2       | 0.58  |
| hsa-mir-93 | CCNB1       | 0.52  |
| hsa-mir-93 | CCNB2       | 0.61  |
| hsa-mir-93 | CCNE2       | 0.45  |
| hsa-mir-93 | CDC2        | 0.54  |
| hsa-mir-93 | CDC20       | 0.55  |
| hsa-mir-93 | CDC25C      | 0.58  |
| hsa-mir-93 | CDC45L      | 0.59  |
| hsa-mir-93 | CDC6        | 0.56  |
| hsa-mir-93 | CDC7        | 0.47  |
| hsa-mir-93 | CDCA2       | 0.53  |
| hsa-mir-93 | CDCA5       | 0.55  |
| hsa-mir-93 | CDCA7       | 0.6   |
| hsa-mir-93 | CDCA8       | 0.6   |
| hsa-mir-93 | CDT1        | 0.53  |
| hsa-mir-93 | CENPA       | 0.59  |
| hsa-mir-93 | CENPE       | 0.57  |
| hsa-mir-93 | CENPF       | 0.6   |
| hsa-mir-93 | CENPH       | 0.6   |
| hsa-mir-93 | CENPK       | 0.54  |
| hsa-mir-93 | CENPM       | 0.52  |
| hsa-mir-93 | CHAF1B      | 0.27  |
| hsa-mir-93 | CHEK1       | 0.56  |
| hsa-mir-93 | CHTF18      | 0.42  |
| hsa-mir-93 | CKAP2       | 0.46  |
| hsa-mir-93 | CKAP2L      | 0.6   |
| hsa-mir-93 | CSRP1       | -0.45 |
| hsa-mir-93 | CST3        | -0.31 |
| hsa-mir-93 | DBF4        | 0.57  |
| hsa-mir-93 | DCC1        | 0.52  |
| hsa-mir-93 | DEPDC1      | 0.48  |
| hsa-mir-93 | DEPDC1B     | 0.61  |
| hsa-mir-93 | DIO2        | -0.37 |
| hsa-mir-93 | KFZp762E131 | 0.6   |
| hsa-mir-93 | DLG7        | 0.58  |
| hsa-mir-93 | DSEL        | 0.46  |
| hsa-mir-93 | DTL         | 0.6   |
| hsa-mir-93 | E2F8        | 0.53  |
| hsa-mir-93 | ECT2        | 0.53  |
| hsa-mir-93 | EPB49       | -0.48 |



|            |          |       |
|------------|----------|-------|
| hsa-mir-93 | ERCC6L   | 0.56  |
| hsa-mir-93 | ESCO2    | 0.63  |
| hsa-mir-93 | ETV1     | 0.43  |
| hsa-mir-93 | EXO1     | 0.58  |
| hsa-mir-93 | EZH2     | 0.6   |
| hsa-mir-93 | FAM111B  | 0.47  |
| hsa-mir-93 | FAM29A   | 0.41  |
| hsa-mir-93 | FAM54A   | 0.56  |
| hsa-mir-93 | FAM64A   | 0.65  |
| hsa-mir-93 | FAM83D   | 0.5   |
| hsa-mir-93 | FANCA    | 0.5   |
| hsa-mir-93 | FANCC    | 0.61  |
| hsa-mir-93 | FANCI    | 0.63  |
| hsa-mir-93 | FBXO5    | 0.61  |
| hsa-mir-93 | FLJ39660 | 0.44  |
| hsa-mir-93 | FOXM1    | 0.56  |
| hsa-mir-93 | GAS6     | -0.42 |
| hsa-mir-93 | GINS1    | 0.52  |
| hsa-mir-93 | GINS2    | 0.59  |
| hsa-mir-93 | GINS3    | 0.56  |
| hsa-mir-93 | GPR37    | -0.3  |
| hsa-mir-93 | GPSM2    | 0.45  |
| hsa-mir-93 | GSG2     | 0.56  |
| hsa-mir-93 | GTSE1    | 0.54  |
| hsa-mir-93 | HELLS    | 0.5   |
| hsa-mir-93 | HEPH     | -0.4  |
| hsa-mir-93 | HIST1H1B | 0.46  |
| hsa-mir-93 | HIST1H3J | 0.54  |
| hsa-mir-93 | HMG4L    | 0.51  |
| hsa-mir-93 | HMGB2    | 0.54  |
| hsa-mir-93 | HMGB3    | 0.48  |
| hsa-mir-93 | HRASLS3  | -0.41 |
| hsa-mir-93 | HSD11B1  | -0.45 |
| hsa-mir-93 | INTS7    | 0.47  |
| hsa-mir-93 | KIAA1217 | -0.45 |
| hsa-mir-93 | KIAA1553 | 0.52  |
| hsa-mir-93 | KIAA1958 | 0.48  |
| hsa-mir-93 | KIF11    | 0.49  |
| hsa-mir-93 | KIF14    | 0.58  |
| hsa-mir-93 | KIF15    | 0.65  |
| hsa-mir-93 | KIF18A   | 0.58  |
| hsa-mir-93 | KIF23    | 0.56  |
| hsa-mir-93 | KIF2C    | 0.62  |
| hsa-mir-93 | KIF4A    | 0.58  |
| hsa-mir-93 | KIFC1    | 0.61  |
| hsa-mir-93 | KNTC1    | 0.55  |
| hsa-mir-93 | KPNA2    | 0.45  |
| hsa-mir-93 | LMNB1    | 0.5   |
| hsa-mir-93 | MAD2L1   | 0.56  |
| hsa-mir-93 | MCM10    | 0.56  |
| hsa-mir-93 | MCM2     | 0.53  |
| hsa-mir-93 | MCM3     | 0.5   |
| hsa-mir-93 | MCM4     | 0.39  |

|            |           |       |
|------------|-----------|-------|
| hsa-mir-93 | MCM6      | 0.5   |
| hsa-mir-93 | MCM8      | 0.49  |
| hsa-mir-93 | MELK      | 0.59  |
| hsa-mir-93 | MEX3A     | 0.65  |
| hsa-mir-93 | MKI67     | 0.51  |
| hsa-mir-93 | MLF1IP    | 0.59  |
| hsa-mir-93 | MND1      | 0.56  |
| hsa-mir-93 | MXD3      | 0.54  |
| hsa-mir-93 | MYBL2     | 0.54  |
| hsa-mir-93 | NCAPG2    | 0.53  |
| hsa-mir-93 | NCAPH     | 0.56  |
| hsa-mir-93 | NDC80     | 0.63  |
| hsa-mir-93 | NEIL3     | 0.58  |
| hsa-mir-93 | NEK2      | 0.53  |
| hsa-mir-93 | NT5DC2    | 0.41  |
| hsa-mir-93 | NUF2      | 0.63  |
| hsa-mir-93 | NUSAP1    | 0.61  |
| hsa-mir-93 | NY-SAR-48 | 0.58  |
| hsa-mir-93 | ODC1      | 0.52  |
| hsa-mir-93 | OIP5      | 0.57  |
| hsa-mir-93 | ORC1L     | 0.56  |
| hsa-mir-93 | ORC6L     | 0.51  |
| hsa-mir-93 | PBK       | 0.62  |
| hsa-mir-93 | PLEKHK1   | 0.51  |
| hsa-mir-93 | PLK4      | 0.56  |
| hsa-mir-93 | POLG      | 0.61  |
| hsa-mir-93 | POLQ      | 0.49  |
| hsa-mir-93 | PRC1      | 0.53  |
| hsa-mir-93 | PRNP      | -0.57 |
| hsa-mir-93 | PTTG1     | 0.53  |
| hsa-mir-93 | PTTG2     | 0.56  |
| hsa-mir-93 | PTTG3     | 0.56  |
| hsa-mir-93 | RAB11FIP5 | -0.5  |
| hsa-mir-93 | RACGAP1   | 0.56  |
| hsa-mir-93 | RAD51     | 0.6   |
| hsa-mir-93 | RAD51AP1  | 0.54  |
| hsa-mir-93 | RAD54L    | 0.55  |
| hsa-mir-93 | REEP5     | -0.51 |
| hsa-mir-93 | RFC4      | 0.53  |
| hsa-mir-93 | RFC5      | 0.5   |
| hsa-mir-93 | RGS10     | -0.35 |
| hsa-mir-93 | RILP      | -0.45 |
| hsa-mir-93 | RNASEH2A  | 0.56  |
| hsa-mir-93 | RNF138    | 0.48  |
| hsa-mir-93 | RRM2      | 0.55  |
| hsa-mir-93 | SALL3     | 0.43  |
| hsa-mir-93 | SGOL2     | 0.58  |
| hsa-mir-93 | SH3BP4    | 0.4   |
| hsa-mir-93 | SIRPA     | -0.47 |
| hsa-mir-93 | SLC7A8    | -0.44 |
| hsa-mir-93 | SMC2      | 0.5   |
| hsa-mir-93 | SOX4      | 0.57  |
| hsa-mir-93 | SPAG5     | 0.55  |

|            |          |       |
|------------|----------|-------|
| hsa-mir-93 | SPC25    | 0.55  |
| hsa-mir-93 | STIL     | 0.54  |
| hsa-mir-93 | TACC3    | 0.47  |
| hsa-mir-93 | TCF3     | 0.51  |
| hsa-mir-93 | TIMELESS | 0.6   |
| hsa-mir-93 | TMSL8    | 0.42  |
| hsa-mir-93 | TNFSF12  | -0.47 |
| hsa-mir-93 | TOP2A    | 0.63  |
| hsa-mir-93 | TPX2     | 0.6   |
| hsa-mir-93 | TRAIP    | 0.56  |
| hsa-mir-93 | TRIP13   | 0.46  |
| hsa-mir-93 | TROAP    | 0.49  |
| hsa-mir-93 | TSPYL5   | -0.4  |
| hsa-mir-93 | TTK      | 0.62  |
| hsa-mir-93 | TYMS     | 0.55  |
| hsa-mir-93 | UBE2C    | 0.62  |
| hsa-mir-93 | UBE2S    | 0.45  |
| hsa-mir-93 | UBE2T    | 0.43  |
| hsa-mir-93 | UHRF1    | 0.55  |
| hsa-mir-93 | WDR51A   | 0.51  |
| hsa-mir-93 | XRCC2    | 0.54  |
| hsa-mir-93 | YBX1     | 0.55  |
| hsa-mir-93 | ZNF300   | 0.6   |
| hsa-mir-93 | ZWINT    | 0.55  |
| hsa-mir-95 | CDH18    | 0.53  |
| hsa-mir-95 | CDH9     | 0.59  |
| hsa-mir-95 | COL5A2   | -0.54 |
| hsa-mir-95 | DYRK3    | -0.39 |
| hsa-mir-95 | FCN3     | -0.41 |
| hsa-mir-95 | GABRB1   | 0.36  |
| hsa-mir-95 | HCN1     | 0.51  |
| hsa-mir-95 | HRNBP3   | 0.4   |
| hsa-mir-95 | INA      | 0.49  |
| hsa-mir-95 | KIAA2022 | 0.39  |
| hsa-mir-95 | LINGO2   | 0.4   |
| hsa-mir-95 | NET1     | 0.38  |
| hsa-mir-95 | NETO1    | 0.5   |
| hsa-mir-95 | POU6F2   | 0.36  |
| hsa-mir-95 | RETN     | -0.47 |
| hsa-mir-95 | SLC24A5  | 0.48  |
| hsa-mir-95 | SLITRK4  | 0.49  |
| hsa-mir-95 | SNIP     | 0.46  |
| hsa-mir-95 | SSTR1    | 0.53  |
| hsa-mir-95 | TGFBI    | -0.57 |
| hsa-mir-95 | ZNF561   | -0.36 |
| hsa-mir-96 | CHRNA1   | 0.34  |
| hsa-mir-96 | DPP4     | 0.15  |
| hsa-mir-96 | FAM92B   | -0.23 |
| hsa-mir-96 | GCNT2    | 0.32  |
| hsa-mir-96 | NEUROD1  | 0.29  |
| hsa-mir-96 | PRR15    | -0.22 |
| hsa-mir-96 | SH3BGR   | -0.23 |
| hsa-mir-96 | ZNF175   | 0.12  |

|             |             |       |
|-------------|-------------|-------|
| hsa-mir-98  | C19orf59    | -0.42 |
| hsa-mir-98  | CARD6       | -0.21 |
| hsa-mir-98  | CD2         | -0.34 |
| hsa-mir-98  | CLEC10A     | -0.43 |
| hsa-mir-98  | CLEC2B      | -0.39 |
| hsa-mir-98  | FAS         | -0.29 |
| hsa-mir-98  | IL7R        | -0.38 |
| hsa-mir-98  | ITGBL1      | -0.28 |
| hsa-mir-98  | KCNE3       | -0.36 |
| hsa-mir-98  | KCNJ15      | -0.41 |
| hsa-mir-98  | LTF         | -0.26 |
| hsa-mir-98  | RETN        | -0.4  |
| hsa-mir-98  | SLAMF8      | -0.38 |
| hsa-mir-98  | SNAI2       | -0.34 |
| hsa-mir-98  | ST8SIA4     | -0.33 |
| hsa-mir-98  | TMEM64      | -0.34 |
| hsa-mir-99a | ACPL2       | 0.25  |
| hsa-mir-99a | ADAM5P      | 0.09  |
| hsa-mir-99a | ADAMTS6     | 0.43  |
| hsa-mir-99a | AKR1C1      | -0.25 |
| hsa-mir-99a | ARHGEF10L   | 0.44  |
| hsa-mir-99a | ART4        | -0.31 |
| hsa-mir-99a | ATAD4       | -0.28 |
| hsa-mir-99a | BAIAP2L1    | -0.35 |
| hsa-mir-99a | BMP5        | -0.25 |
| hsa-mir-99a | C10orf63    | 0.37  |
| hsa-mir-99a | C10orf65    | 0.39  |
| hsa-mir-99a | C10orf79    | 0.39  |
| hsa-mir-99a | C18orf2     | -0.4  |
| hsa-mir-99a | C18orf34    | 0.38  |
| hsa-mir-99a | C1orf192    | 0.36  |
| hsa-mir-99a | C1QTNF5     | 0.4   |
| hsa-mir-99a | C20orf26    | 0.42  |
| hsa-mir-99a | C21orf34    | 0.44  |
| hsa-mir-99a | C21orf82    | 0.37  |
| hsa-mir-99a | C22orf23    | 0.44  |
| hsa-mir-99a | C6orf105    | -0.42 |
| hsa-mir-99a | C6orf118    | 0.32  |
| hsa-mir-99a | C8A         | -0.32 |
| hsa-mir-99a | C9orf98     | 0.42  |
| hsa-mir-99a | CASC1       | 0.41  |
| hsa-mir-99a | CASK        | 0.4   |
| hsa-mir-99a | CCDC121     | 0.37  |
| hsa-mir-99a | CCDC41      | 0.34  |
| hsa-mir-99a | CCK         | -0.06 |
| hsa-mir-99a | CHST9       | 0.52  |
| hsa-mir-99a | CPXCR1      | 0.11  |
| hsa-mir-99a | CR1L        | -0.35 |
| hsa-mir-99a | DAND5       | 0.36  |
| hsa-mir-99a | DCDC5       | 0.51  |
| hsa-mir-99a | DKFZp666G05 | 0.33  |
| hsa-mir-99a | DLEC1       | 0.41  |
| hsa-mir-99a | DLG5        | 0.31  |

|             |           |       |
|-------------|-----------|-------|
| hsa-mir-99a | DMRT1     | 0.28  |
| hsa-mir-99a | DNAH7     | 0.46  |
| hsa-mir-99a | EN1       | 0.19  |
| hsa-mir-99a | ETV5      | -0.36 |
| hsa-mir-99a | EXPH5     | 0.44  |
| hsa-mir-99a | FAM122C   | 0.41  |
| hsa-mir-99a | FAM83B    | -0.4  |
| hsa-mir-99a | FAM9B     | -0.31 |
| hsa-mir-99a | FBXL21    | -0.36 |
| hsa-mir-99a | FOXN4     | 0.32  |
| hsa-mir-99a | FUT3      | -0.09 |
| hsa-mir-99a | GDF9      | 0.46  |
| hsa-mir-99a | GLIS3     | 0.39  |
| hsa-mir-99a | GRHL3     | 0.31  |
| hsa-mir-99a | GSG1L     | 0.35  |
| hsa-mir-99a | GYPB      | -0.36 |
| hsa-mir-99a | HMGA2     | -0.33 |
| hsa-mir-99a | HOOK1     | -0.34 |
| hsa-mir-99a | HOXB9     | -0.29 |
| hsa-mir-99a | HSPB8     | 0.38  |
| hsa-mir-99a | IGSF5     | 0.38  |
| hsa-mir-99a | IL17RD    | 0.44  |
| hsa-mir-99a | KCNN2     | 0.42  |
| hsa-mir-99a | KIAA1383  | 0.3   |
| hsa-mir-99a | KIAA1505  | 0.41  |
| hsa-mir-99a | LIPG      | 0.32  |
| hsa-mir-99a | LOC129881 | 0.4   |
| hsa-mir-99a | LOC441601 | -0.37 |
| hsa-mir-99a | LRP2BP    | 0.35  |
| hsa-mir-99a | LRRC48    | 0.4   |
| hsa-mir-99a | LYST      | 0.34  |
| hsa-mir-99a | MAGEA8    | -0.33 |
| hsa-mir-99a | MAGEC1    | -0.25 |
| hsa-mir-99a | MAGEC2    | -0.21 |
| hsa-mir-99a | MAL2      | -0.22 |
| hsa-mir-99a | MGC13057  | 0.38  |
| hsa-mir-99a | MGC3771   | 0.44  |
| hsa-mir-99a | MIG7      | 0.34  |
| hsa-mir-99a | MSMB      | -0.31 |
| hsa-mir-99a | MSTN      | 0.44  |
| hsa-mir-99a | MYH7      | 0.39  |
| hsa-mir-99a | MYLC2PL   | -0.36 |
| hsa-mir-99a | NBPF1     | 0.37  |
| hsa-mir-99a | NFIA      | 0.45  |
| hsa-mir-99a | NFIB      | 0.47  |
| hsa-mir-99a | NOX3      | 0.4   |
| hsa-mir-99a | NPTX2     | -0.26 |
| hsa-mir-99a | ODAM      | -0.33 |
| hsa-mir-99a | OR51I1    | -0.34 |
| hsa-mir-99a | PARD3B    | 0.44  |
| hsa-mir-99a | PCYT1B    | 0.38  |
| hsa-mir-99a | PGAM2     | 0.38  |
| hsa-mir-99a | PHLDA2    | -0.41 |

|             |          |       |
|-------------|----------|-------|
| hsa-mir-99a | PI16     | 0.39  |
| hsa-mir-99a | PPM1F    | -0.46 |
| hsa-mir-99a | PRSS1    | -0.4  |
| hsa-mir-99a | PRSS2    | -0.43 |
| hsa-mir-99a | PRSS3    | -0.4  |
| hsa-mir-99a | RAVER2   | 0.43  |
| hsa-mir-99a | RFX4     | 0.45  |
| hsa-mir-99a | RIBC1    | 0.48  |
| hsa-mir-99a | RPE65    | 0.29  |
| hsa-mir-99a | RSHL3    | 0.43  |
| hsa-mir-99a | S100A2   | 0.51  |
| hsa-mir-99a | SCGB1D1  | 0.38  |
| hsa-mir-99a | SCGB1D2  | 0.41  |
| hsa-mir-99a | SCUBE2   | 0.38  |
| hsa-mir-99a | SEMA3C   | -0.3  |
| hsa-mir-99a | SERPINB2 | -0.37 |
| hsa-mir-99a | SERPINB3 | -0.31 |
| hsa-mir-99a | SERPINB4 | -0.3  |
| hsa-mir-99a | SH3GL3   | -0.25 |
| hsa-mir-99a | SLC18A1  | -0.28 |
| hsa-mir-99a | SMPDL3A  | -0.35 |
| hsa-mir-99a | SNCAIP   | 0.53  |
| hsa-mir-99a | SPAG1    | 0.44  |
| hsa-mir-99a | SPINK5   | -0.3  |
| hsa-mir-99a | SPRR1B   | -0.43 |
| hsa-mir-99a | SSTR1    | -0.28 |
| hsa-mir-99a | STK33    | 0.43  |
| hsa-mir-99a | SULT2A1  | -0.34 |
| hsa-mir-99a | SYT13    | -0.12 |
| hsa-mir-99a | SYTL4    | 0.47  |
| hsa-mir-99a | TMIE     | 0.36  |
| hsa-mir-99a | TRPM1    | -0.41 |
| hsa-mir-99a | UGT2B28  | -0.35 |
| hsa-mir-99a | UST      | 0.28  |
| hsa-mir-99a | VNN1     | -0.41 |
| hsa-mir-99a | WDR49    | 0.38  |
| hsa-mir-99a | WNK4     | -0.3  |
| hsa-mir-99a | YIPF7    | 0.48  |
| hsa-mir-99a | YSK4     | 0.34  |
| hsa-mir-99a | ZBTB20   | 0.44  |
| hsa-mir-99b | AHCYL1   | 0.28  |
| hsa-mir-99b | AQP4     | 0.39  |
| hsa-mir-99b | BDH2     | 0.41  |
| hsa-mir-99b | CKMT2    | 0.36  |
| hsa-mir-99b | CST3     | 0.31  |
| hsa-mir-99b | DDIT4L   | 0.3   |
| hsa-mir-99b | GRIK1    | 0.36  |
| hsa-mir-99b | IL17D    | 0.27  |
| hsa-mir-99b | ITGA6    | 0.3   |
| hsa-mir-99b | KCNN2    | 0.34  |
| hsa-mir-99b | KIAA0828 | 0.39  |
| hsa-mir-99b | KLHL26   | 0.31  |
| hsa-mir-99b | LOC81691 | -0.32 |

|             |          |       |
|-------------|----------|-------|
| hsa-mir-99b | LPPR4    | 0.26  |
| hsa-mir-99b | MAOA     | 0.35  |
| hsa-mir-99b | METTL7A  | 0.3   |
| hsa-mir-99b | MOSC2    | 0.41  |
| hsa-mir-99b | MYO5C    | 0.3   |
| hsa-mir-99b | PPARGC1A | 0.37  |
| hsa-mir-99b | ROBO2    | 0.3   |
| hsa-mir-99b | SLFN11   | -0.1  |
| hsa-mir-99b | TFPI2    | -0.14 |
| hsa-mir-99b | WDR16    | 0.22  |
| hsa-mir-99b | ZNF671   | 0.33  |
| hsa-mir-99b | ZNF8     | 0.29  |

**Supplementary Table 3. List of Putative Direct Targets**

| <b>miR</b>  | <b>gene</b> | <b>correlation</b> | <b>prediction databases</b> |
|-------------|-------------|--------------------|-----------------------------|
| hsa-mir-27a | RUNDC3A     | -0.64              | miranda,pictar,targetscan   |
| hsa-mir-23a | ARHGEF7     | -0.61              | miranda,pictar,targetscan   |
| hsa-mir-9   | P4HA2       | -0.61              | miranda,pictar,targetscan   |
| hsa-mir-21  | PPP3CA      | -0.59              | miranda,pictar,targetscan   |
| hsa-mir-27a | CPEB3       | -0.58              | miranda,pictar,targetscan   |
| hsa-mir-23a | SATB1       | -0.57              | miranda,pictar,targetscan   |
| hsa-mir-27a | FBXW7       | -0.57              | miranda,pictar,targetscan   |
| hsa-mir-21  | CPEB3       | -0.56              | miranda,pictar,targetscan   |
| hsa-mir-29b | MYBL2       | -0.56              | miranda,pictar,targetscan   |
| hsa-mir-23a | PAK3        | -0.56              | miranda,pictar,targetscan   |
| hsa-mir-29a | MYBL2       | -0.54              | miranda,pictar,targetscan   |
| hsa-mir-9   | CAST        | -0.54              | miranda,pictar,targetscan   |
| hsa-mir-27a | FAM77C      | -0.53              | miranda,pictar,targetscan   |
| hsa-mir-9   | DSE         | -0.53              | miranda,pictar,targetscan   |
| hsa-mir-27a | ANKRD43     | -0.52              | miranda,pictar,targetscan   |
| hsa-mir-16  | RNF43       | -0.5               | miranda,pictar,targetscan   |
| hsa-mir-27a | ZNF238      | -0.5               | miranda,pictar,targetscan   |
| hsa-mir-9   | EMB         | -0.49              | miranda,pictar,targetscan   |
| hsa-mir-9   | TGFBI       | -0.49              | miranda,pictar,targetscan   |
| hsa-mir-155 | SATB1       | -0.48              | miranda,pictar,targetscan   |
| hsa-mir-29b | C5ORF13     | -0.48              | miranda,pictar,targetscan   |
| hsa-mir-34a | DCX         | -0.47              | miranda,pictar,targetscan   |
| hsa-mir-222 | RP11-35N6.1 | -0.47              | miranda,pictar,targetscan   |
| hsa-mir-29c | COL4A1      | -0.46              | miranda,pictar,targetscan   |
| hsa-mir-27a | PKIA        | -0.46              | miranda,pictar,targetscan   |
| hsa-mir-221 | RP11-35N6.1 | -0.45              | miranda,pictar,targetscan   |
| hsa-mir-9   | FAM55C      | -0.45              | miranda,pictar,targetscan   |
| hsa-mir-23a | B3GALT2     | -0.45              | miranda,pictar,targetscan   |
| hsa-mir-29b | TRAF4       | -0.45              | miranda,pictar,targetscan   |
| hsa-mir-9   | PHLDB2      | -0.44              | miranda,pictar,targetscan   |
| hsa-mir-29a | C5ORF13     | -0.44              | miranda,pictar,targetscan   |
| hsa-mir-195 | MMD         | -0.43              | miranda,pictar,targetscan   |
| hsa-mir-9   | ARHGAP24    | -0.43              | miranda,pictar,targetscan   |
| hsa-mir-29c | C5ORF13     | -0.42              | miranda,pictar,targetscan   |
| hsa-mir-34a | SOX4        | -0.42              | miranda,pictar,targetscan   |
| hsa-mir-34a | PDGFRA      | -0.4               | miranda,pictar,targetscan   |
| hsa-mir-29a | TRAF4       | -0.4               | miranda,pictar,targetscan   |
| hsa-mir-9   | SLC31A2     | -0.4               | miranda,pictar,targetscan   |
| hsa-mir-9   | PRF1        | -0.4               | miranda,pictar,targetscan   |
| hsa-mir-195 | INPP5F      | -0.37              | miranda,pictar,targetscan   |
| hsa-mir-9   | CAPZA1      | -0.36              | miranda,pictar,targetscan   |
| hsa-mir-29a | DCX         | -0.35              | miranda,pictar,targetscan   |
| hsa-mir-9   | COL15A1     | -0.35              | miranda,pictar,targetscan   |
| hsa-mir-29a | EPHB3       | -0.32              | miranda,pictar,targetscan   |
| hsa-mir-29b | TRIB2       | -0.32              | miranda,pictar,targetscan   |



**Supplementary Table 4A. Unique Edges in Classical Subtype**

| <b>miR</b>    | <b>gene</b> | <b>correlation</b> |
|---------------|-------------|--------------------|
| hsa-let-7b    | DACH1       | -0.38              |
| hsa-let-7d    | NAALADL1    | 0.37               |
| hsa-let-7f    | PDE3B       | 0.41               |
| hsa-let-7f    | TSSK4       | 0.48               |
| hsa-let-7i    | MAMDC4      | -0.34              |
| hsa-let-7i    | ZNF71       | 0.46               |
| hsa-mir-100   | PDLIM2      | -0.52              |
| hsa-mir-103   | MANEA       | 0.50               |
| hsa-mir-10b   | GULP1       | 0.49               |
| hsa-mir-124a  | NOTCH2NL    | 0.27               |
| hsa-mir-127   | CD59        | 0.45               |
| hsa-mir-128b  | LRAT        | 0.36               |
| hsa-mir-130a  | TMEM184A    | -0.48              |
| hsa-mir-130a  | ZFYVE16     | 0.45               |
| hsa-mir-130b  | GEFT        | 0.41               |
| hsa-mir-137   | PAQR7       | 0.12               |
| hsa-mir-138   | CPNE5       | -0.36              |
| hsa-mir-138   | FAT3        | -0.47              |
| hsa-mir-138   | GDI1        | -0.29              |
| hsa-mir-138   | MET         | 0.53               |
| hsa-mir-138   | NCR1        | 0.31               |
| hsa-mir-140   | C10orf78    | 0.45               |
| hsa-mir-141   | CPNE9       | 0.60               |
| hsa-mir-143   | EP400NL     | -0.48              |
| hsa-mir-143   | GPR160      | 0.47               |
| hsa-mir-143   | INVS        | -0.27              |
| hsa-mir-145   | ANKRD16     | -0.54              |
| hsa-mir-145   | KAZALD1     | -0.40              |
| hsa-mir-146a  | DACH1       | 0.37               |
| hsa-mir-149   | DPM3        | -0.50              |
| hsa-mir-149   | HTATIP2     | -0.44              |
| hsa-mir-149   | JTB         | -0.46              |
| hsa-mir-149   | TMEM42      | -0.42              |
| hsa-mir-151   | C10orf93    | 0.44               |
| hsa-mir-151   | FAM10A5     | 0.54               |
| hsa-mir-151   | SIGLEC10    | 0.45               |
| hsa-mir-154*  | CXCL3       | 0.38               |
| hsa-mir-154*  | UGCG        | 0.45               |
| hsa-mir-155   | ATP1A2      | -0.46              |
| hsa-mir-17-3p | C19orf53    | -0.43              |
| hsa-mir-17-3p | HNRPH2      | 0.46               |
| hsa-mir-17-3p | IL33        | 0.35               |
| hsa-mir-17-3p | LOC790955   | -0.29              |
| hsa-mir-17-3p | MRPL54      | -0.49              |
| hsa-mir-17-3p | SLAMF8      | 0.28               |
| hsa-mir-17-3p | UBL5        | -0.43              |
| hsa-mir-181a  | CPNE1       | -0.45              |
| hsa-mir-181a* | GPR103      | 0.37               |
| hsa-mir-181a* | KNDC1       | 0.28               |
| hsa-mir-186   | C10orf64    | 0.55               |
| hsa-mir-186   | C1orf162    | 0.43               |
| hsa-mir-186   | CLCN4       | 0.69               |
| hsa-mir-186   | DBX2        | 0.47               |

|              |          |       |
|--------------|----------|-------|
| hsa-mir-186  | FLJ33790 | -0.57 |
| hsa-mir-186  | GIMAP4   | 0.52  |
| hsa-mir-186  | HAND1    | -0.66 |
| hsa-mir-186  | HPDL     | -0.56 |
| hsa-mir-186  | KCTD19   | -0.53 |
| hsa-mir-186  | KIAA1909 | -0.51 |
| hsa-mir-186  | PIK3C2A  | 0.54  |
| hsa-mir-186  | PRSS2    | -0.69 |
| hsa-mir-186  | SLC9A5   | -0.55 |
| hsa-mir-186  | USP25    | 0.45  |
| hsa-mir-186  | ZDHHC6   | 0.49  |
| hsa-mir-18a  | IL1RAP   | 0.48  |
| hsa-mir-18b  | IFITM2   | -0.49 |
| hsa-mir-190  | RAMP3    | -0.43 |
| hsa-mir-191  | LYSMD3   | 0.45  |
| hsa-mir-192  | ARG2     | -0.43 |
| hsa-mir-192  | PTX3     | -0.48 |
| hsa-mir-192  | SAA1     | -0.37 |
| hsa-mir-193a | BTBD10   | 0.55  |
| hsa-mir-193a | NT5C2    | 0.29  |
| hsa-mir-194  | DPEP2    | 0.59  |
| hsa-mir-194  | E4F1     | -0.42 |
| hsa-mir-194  | EIF4EBP2 | 0.58  |
| hsa-mir-194  | FDX1L    | -0.61 |
| hsa-mir-194  | PTX3     | -0.54 |
| hsa-mir-194  | SIRT1    | 0.47  |
| hsa-mir-195  | BPGM     | -0.39 |
| hsa-mir-195  | PTMA     | 0.36  |
| hsa-mir-195  | TPST1    | -0.36 |
| hsa-mir-196a | SOCS2    | -0.38 |
| hsa-mir-196b | MAPK4    | -0.31 |
| hsa-mir-198  | CPA4     | 0.49  |
| hsa-mir-19b  | VWC2     | 0.28  |
| hsa-mir-200a | LONRF3   | 0.49  |
| hsa-mir-200a | MAP1A    | 0.59  |
| hsa-mir-200a | PLEKHB1  | 0.63  |
| hsa-mir-200a | PPP1R3F  | 0.59  |
| hsa-mir-200a | TMED1    | -0.56 |
| hsa-mir-200b | CALB2    | 0.38  |
| hsa-mir-204  | ERBB4    | -0.51 |
| hsa-mir-210  | WTAP     | 0.53  |
| hsa-mir-214  | C6orf141 | 0.33  |
| hsa-mir-215  | EIF2S1   | -0.58 |
| hsa-mir-215  | FLOT1    | -0.40 |
| hsa-mir-215  | HOOK2    | -0.58 |
| hsa-mir-215  | POLR1C   | -0.56 |
| hsa-mir-215  | SPAG6    | 0.37  |
| hsa-mir-216  | ONECUT2  | -0.61 |
| hsa-mir-216  | TMEM61   | -0.71 |
| hsa-mir-217  | CLEC4G   | -0.72 |
| hsa-mir-217  | ONECUT2  | -0.60 |
| hsa-mir-218  | TK2      | 0.48  |
| hsa-mir-22   | CYP4F2   | 0.40  |
| hsa-mir-221  | HAO2     | 0.30  |
| hsa-mir-222  | PCDH7    | -0.46 |
| hsa-mir-223  | PROM1    | -0.49 |

|                |              |       |
|----------------|--------------|-------|
| hsa-mir-224    | IL17RB       | -0.45 |
| hsa-mir-23a    | MAP1B        | 0.30  |
| hsa-mir-23b    | DGKI         | -0.32 |
| hsa-mir-26a    | HMG3         | 0.45  |
| hsa-mir-26a    | KLHL15       | 0.42  |
| hsa-mir-26a    | PLK2         | 0.37  |
| hsa-mir-26a    | SDC2         | 0.44  |
| hsa-mir-26a    | TNFSF4       | 0.25  |
| hsa-mir-27a    | TFAP2D       | 0.44  |
| hsa-mir-28     | IRF5         | 0.39  |
| hsa-mir-299-5p | PLEKHG5      | -0.45 |
| hsa-mir-29a    | ENOX1        | -0.45 |
| hsa-mir-29b    | RMND5A       | 0.44  |
| hsa-mir-301    | CCNA1        | 0.38  |
| hsa-mir-301    | MYO1E        | 0.36  |
| hsa-mir-301    | PLA2G4D      | -0.44 |
| hsa-mir-301    | TTC19        | 0.43  |
| hsa-mir-30a-3p | FAM59A       | 0.45  |
| hsa-mir-30a-3p | SORL1        | 0.55  |
| hsa-mir-30a-5p | SORCS1       | 0.40  |
| hsa-mir-30b    | DKFZP566E164 | 0.38  |
| hsa-mir-30d    | ATP2A2       | 0.37  |
| hsa-mir-30d    | BDKRB1       | -0.50 |
| hsa-mir-30d    | C20orf10     | 0.45  |
| hsa-mir-30d    | ZNF101       | -0.38 |
| hsa-mir-30e-3p | ALDH2        | 0.52  |
| hsa-mir-30e-3p | GPR103       | 0.48  |
| hsa-mir-30e-3p | ZBTB32       | -0.51 |
| hsa-mir-320    | ASAHL        | -0.39 |
| hsa-mir-323    | CDON         | -0.43 |
| hsa-mir-323    | PLEKHG5      | -0.56 |
| hsa-mir-324-5p | ATP4A        | -0.51 |
| hsa-mir-324-5p | GNB1L        | -0.60 |
| hsa-mir-324-5p | MGC31957     | -0.57 |
| hsa-mir-324-5p | SPRED2       | 0.44  |
| hsa-mir-33     | FLJ46266     | 0.28  |
| hsa-mir-33     | RSHL3        | 0.32  |
| hsa-mir-33     | TCTEX1D1     | 0.34  |
| hsa-mir-33     | TEKT1        | 0.36  |
| hsa-mir-33     | WDR63        | 0.28  |
| hsa-mir-335    | KIAA1161     | -0.51 |
| hsa-mir-338    | HTRA4        | -0.40 |
| hsa-mir-339    | RPL39L       | -0.36 |
| hsa-mir-342    | ZNF488       | -0.32 |
| hsa-mir-361    | ANKRD6       | 0.51  |
| hsa-mir-361    | BMP2K        | 0.39  |
| hsa-mir-361    | FAM107B      | 0.39  |
| hsa-mir-361    | UST          | 0.45  |
| hsa-mir-362    | ADRBK2       | 0.50  |
| hsa-mir-362    | SGMS1        | 0.48  |
| hsa-mir-363    | ABLIM3       | 0.43  |
| hsa-mir-363    | ATF7IP2      | 0.46  |
| hsa-mir-363    | ITGAL        | 0.63  |
| hsa-mir-363    | PPM1H        | 0.59  |
| hsa-mir-363    | TBC1D4       | 0.59  |
| hsa-mir-368    | KIAA0427     | -0.40 |

|                |           |       |
|----------------|-----------|-------|
| hsa-mir-374    | KIRREL3   | 0.41  |
| hsa-mir-376a   | TBC1D13   | -0.36 |
| hsa-mir-377    | GMEB1     | -0.39 |
| hsa-mir-377    | IL8       | 0.42  |
| hsa-mir-377    | PLEKHG5   | -0.50 |
| hsa-mir-383    | SCN4B     | 0.40  |
| hsa-mir-409-3p | PTX3      | 0.57  |
| hsa-mir-410    | IRF2BP1   | -0.39 |
| hsa-mir-410    | PLEKHG5   | -0.50 |
| hsa-mir-421    | S100A7    | -0.26 |
| hsa-mir-421    | TULP4     | 0.37  |
| hsa-mir-423    | BRS3      | -0.49 |
| hsa-mir-425-5p | APOA4     | -0.53 |
| hsa-mir-425-5p | EFCAB4B   | -0.45 |
| hsa-mir-450    | SIX6      | -0.50 |
| hsa-mir-451    | PLAA      | -0.25 |
| hsa-mir-452*   | FJX1      | -0.32 |
| hsa-mir-454-3p | VWC2      | 0.41  |
| hsa-mir-455    | HOXA4     | -0.42 |
| hsa-mir-484    | ATP6V0A4  | -0.52 |
| hsa-mir-484    | CR1L      | -0.56 |
| hsa-mir-484    | DAZ2      | -0.50 |
| hsa-mir-486    | GLULD1    | -0.47 |
| hsa-mir-491    | DENND4C   | 0.43  |
| hsa-mir-491    | ENG       | -0.17 |
| hsa-mir-491    | LRSAM1    | -0.38 |
| hsa-mir-494    | MTMR4     | -0.52 |
| hsa-mir-494    | RAB21     | -0.41 |
| hsa-mir-495    | ULK1      | -0.38 |
| hsa-mir-497    | MGC52110  | -0.29 |
| hsa-mir-500    | DIP2B     | 0.47  |
| hsa-mir-500    | LOC133874 | 0.48  |
| hsa-mir-500    | ZNF189    | 0.48  |
| hsa-mir-503    | BCHE      | -0.34 |
| hsa-mir-513    | TMEM147   | 0.37  |
| hsa-mir-518a   | BSDC1     | 0.46  |
| hsa-mir-519d   | BSDC1     | 0.42  |
| hsa-mir-519e*  | WNT16     | -0.39 |
| hsa-mir-520d   | LOC158381 | -0.39 |
| hsa-mir-520g   | SGPP1     | -0.34 |
| hsa-mir-532    | C12orf34  | 0.34  |
| hsa-mir-551b   | C1orf58   | 0.57  |
| hsa-mir-551b   | C1orf71   | 0.51  |
| hsa-mir-551b   | C20orf46  | -0.59 |
| hsa-mir-551b   | C4orf7    | -0.61 |
| hsa-mir-551b   | FAM55C    | 0.54  |
| hsa-mir-551b   | RALB      | 0.52  |
| hsa-mir-563    | FAT       | 0.40  |
| hsa-mir-564    | CLEC4D    | 0.48  |
| hsa-mir-565    | ARG2      | -0.33 |
| hsa-mir-565    | CAV2      | -0.41 |
| hsa-mir-565    | GYG2      | 0.36  |
| hsa-mir-565    | MMP10     | -0.47 |
| hsa-mir-572    | ADORA1    | -0.60 |
| hsa-mir-572    | C20orf3   | -0.62 |
| hsa-mir-572    | MPDU1     | -0.60 |

|                |          |       |
|----------------|----------|-------|
| hsa-mir-572    | OAZ2     | -0.56 |
| hsa-mir-572    | RETSAT   | -0.61 |
| hsa-mir-579    | RORA     | -0.31 |
| hsa-mir-601    | FLJ20160 | -0.49 |
| hsa-mir-610    | PIP5K3   | -0.60 |
| hsa-mir-610    | ROR2     | 0.45  |
| hsa-mir-623    | TBL1XR1  | -0.51 |
| hsa-mir-638    | KCTD1    | -0.48 |
| hsa-mir-649    | RASGRF2  | 0.58  |
| hsa-mir-650    | RASA1    | -0.48 |
| hsa-mir-660    | CXorf57  | 0.35  |
| hsa-mir-660    | FAM107B  | 0.49  |
| hsa-mir-671    | EXOSC7   | 0.35  |
| hsa-mir-671    | GLT8D3   | -0.41 |
| hsa-mir-671    | S100A7   | 0.37  |
| hsa-mir-671    | TOR1AIP1 | -0.34 |
| hsa-mir-7      | RNMT     | -0.57 |
| hsa-mir-765    | ATP2B1   | -0.46 |
| hsa-mir-765    | CD1A     | 0.48  |
| hsa-mir-765    | MAP4K1   | 0.56  |
| hsa-mir-765    | PIP5K3   | -0.58 |
| hsa-mir-765    | ROCK2    | -0.49 |
| hsa-mir-769-5p | ADH4     | -0.44 |
| hsa-mir-769-5p | ANXA8L2  | -0.39 |
| hsa-mir-769-5p | APOA4    | -0.49 |
| hsa-mir-769-5p | C19orf46 | -0.41 |
| hsa-mir-769-5p | C6orf156 | -0.47 |
| hsa-mir-769-5p | C8A      | -0.46 |
| hsa-mir-769-5p | C8G      | -0.46 |
| hsa-mir-769-5p | CRB3     | -0.45 |
| hsa-mir-769-5p | DQX1     | -0.48 |
| hsa-mir-769-5p | GPR84    | 0.40  |
| hsa-mir-769-5p | IPO9     | 0.42  |
| hsa-mir-769-5p | KRT34    | -0.39 |
| hsa-mir-769-5p | LY6G6C   | -0.49 |
| hsa-mir-769-5p | MPN2     | -0.50 |
| hsa-mir-769-5p | MUCL1    | -0.40 |
| hsa-mir-769-5p | SPRR3    | -0.48 |
| hsa-mir-769-5p | THSD3    | -0.42 |
| hsa-mir-769-5p | TMC4     | -0.46 |
| hsa-mir-769-5p | TNNC1    | -0.45 |
| hsa-mir-769-5p | UPK1A    | -0.48 |
| hsa-mir-769-5p | ZG16     | -0.48 |
| hsa-mir-801    | ANGEL2   | -0.59 |
| hsa-mir-801    | DAZ2     | 0.52  |
| hsa-mir-801    | SLK      | -0.59 |
| hsa-mir-801    | SNX16    | -0.69 |
| hsa-mir-801    | ZNF41    | -0.61 |
| hsa-mir-9      | BAT1     | -0.26 |
| hsa-mir-9      | HSPB6    | -0.45 |
| hsa-mir-92     | C20orf52 | -0.40 |
| hsa-mir-92     | GFI1     | -0.51 |
| hsa-mir-92b    | VAMP5    | -0.48 |
| hsa-mir-95     | FOSB     | -0.52 |
| hsa-mir-96     | NP       | -0.38 |
| hsa-mir-98     | LTBR     | 0.48  |

|             |           |      |
|-------------|-----------|------|
| hsa-mir-99a | TNFAIP8L2 | 0.49 |
| hsa-mir-99b | TP53INP1  | 0.46 |

**Supplementary Table 4B. Unique Edges in Neural Subtype**

| <b>miR</b>  | <b>gene</b> | <b>correlation</b> |
|-------------|-------------|--------------------|
| hsa-let-7c  | SEPT5       | -0.59              |
| hsa-let-7c  | AADACL1     | -0.66              |
| hsa-let-7c  | ANKRD43     | -0.70              |
| hsa-let-7c  | ARHGAP20    | -0.54              |
| hsa-let-7c  | C11orf41    | -0.56              |
| hsa-let-7c  | CAMKV       | -0.52              |
| hsa-let-7c  | CBFA2T3     | -0.45              |
| hsa-let-7c  | CBLN2       | -0.61              |
| hsa-let-7c  | CRHBP       | -0.69              |
| hsa-let-7c  | CXCL12      | -0.61              |
| hsa-let-7c  | DEPDC7      | -0.53              |
| hsa-let-7c  | DNM3        | -0.48              |
| hsa-let-7c  | DOCK4       | -0.60              |
| hsa-let-7c  | EXTL1       | -0.54              |
| hsa-let-7c  | FAM19A2     | -0.62              |
| hsa-let-7c  | FAM55C      | -0.47              |
| hsa-let-7c  | HOXB2       | 0.41               |
| hsa-let-7c  | HOXB3       | 0.39               |
| hsa-let-7c  | HS6ST3      | -0.63              |
| hsa-let-7c  | KCNJ12      | -0.55              |
| hsa-let-7c  | KIAA0748    | -0.67              |
| hsa-let-7c  | LARGE       | -0.50              |
| hsa-let-7c  | LINGO2      | -0.64              |
| hsa-let-7c  | NAP1L3      | -0.54              |
| hsa-let-7c  | NBL1        | -0.68              |
| hsa-let-7c  | PREPL       | -0.56              |
| hsa-let-7c  | PSD3        | -0.59              |
| hsa-let-7c  | RBP4        | -0.66              |
| hsa-let-7c  | RBP7        | -0.63              |
| hsa-let-7c  | REPS2       | -0.60              |
| hsa-let-7c  | RIMS3       | -0.54              |
| hsa-let-7c  | SLC16A4     | 0.54               |
| hsa-let-7c  | SLC2A12     | -0.55              |
| hsa-let-7c  | SLC4A1AP    | -0.62              |
| hsa-let-7c  | SSX2IP      | -0.57              |
| hsa-let-7c  | SYNJ1       | -0.54              |
| hsa-let-7c  | TRIM59      | -0.69              |
| hsa-let-7c  | WDR47       | -0.54              |
| hsa-let-7c  | ZNF384      | 0.51               |
| hsa-let-7c  | ZNF540      | -0.47              |
| hsa-let-7d  | KIRREL2     | -0.46              |
| hsa-let-7f  | CD244       | -0.63              |
| hsa-let-7f  | SV2C        | -0.51              |
| hsa-let-7i  | KIAA2022    | -0.61              |
| hsa-mir-100 | ADAD2       | -0.58              |
| hsa-mir-100 | ARHGAP20    | -0.51              |
| hsa-mir-100 | C6orf26     | 0.58               |
| hsa-mir-100 | RHBDL2      | -0.56              |
| hsa-mir-100 | TRAK2       | -0.61              |
| hsa-mir-101 | DENND1A     | 0.62               |
| hsa-mir-101 | SH3GLB1     | -0.67              |
| hsa-mir-103 | C1orf218    | -0.48              |
| hsa-mir-103 | C20orf46    | 0.63               |

|              |          |       |
|--------------|----------|-------|
| hsa-mir-103  | DPYD     | -0.60 |
| hsa-mir-103  | EGFL7    | 0.61  |
| hsa-mir-103  | IQGAP1   | -0.53 |
| hsa-mir-103  | NFE2L3   | -0.58 |
| hsa-mir-105  | C10orf63 | 0.64  |
| hsa-mir-105  | C1orf192 | 0.57  |
| hsa-mir-105  | C8orf58  | 0.62  |
| hsa-mir-105  | IL20     | -0.71 |
| hsa-mir-105  | ITGB8    | 0.69  |
| hsa-mir-105  | KLHL23   | -0.61 |
| hsa-mir-105  | MT1H     | 0.53  |
| hsa-mir-105  | PPEF1    | -0.49 |
| hsa-mir-105  | RAMP1    | 0.54  |
| hsa-mir-105  | RPL10A   | -0.58 |
| hsa-mir-105  | SBSN     | -0.72 |
| hsa-mir-105  | SPANXD   | -0.60 |
| hsa-mir-106a | 9-Mar    | 0.53  |
| hsa-mir-106a | ACCN1    | -0.58 |
| hsa-mir-106a | CA11     | -0.58 |
| hsa-mir-106a | CACNG2   | -0.52 |
| hsa-mir-106a | EPHA8    | -0.57 |
| hsa-mir-106a | KHDRBS2  | -0.53 |
| hsa-mir-106a | LDOC1    | -0.65 |
| hsa-mir-106a | LINGO2   | -0.52 |
| hsa-mir-106a | LRRC37B  | 0.65  |
| hsa-mir-106a | MGC4172  | -0.45 |
| hsa-mir-106a | MYCL1    | 0.61  |
| hsa-mir-106a | SOX4     | 0.74  |
| hsa-mir-106a | ZIC1     | 0.64  |
| hsa-mir-106a | ZNF193   | 0.72  |
| hsa-mir-106b | CCL27    | 0.52  |
| hsa-mir-106b | CDH7     | -0.57 |
| hsa-mir-106b | DARS     | 0.49  |
| hsa-mir-106b | DPYSL3   | 0.68  |
| hsa-mir-106b | EIF4A3   | 0.64  |
| hsa-mir-106b | FGFBP2   | 0.58  |
| hsa-mir-106b | GIPC3    | -0.74 |
| hsa-mir-106b | GLT8D1   | 0.55  |
| hsa-mir-106b | GSX2     | 0.51  |
| hsa-mir-106b | HSPA5    | 0.51  |
| hsa-mir-106b | NPPB     | 0.39  |
| hsa-mir-106b | PSMF1    | 0.64  |
| hsa-mir-106b | RCN1     | 0.59  |
| hsa-mir-106b | RIMS2    | -0.59 |
| hsa-mir-106b | SLC16A8  | -0.53 |
| hsa-mir-106b | SOX2     | 0.59  |
| hsa-mir-106b | TGIF1    | 0.68  |
| hsa-mir-106b | UQCRB    | -0.58 |
| hsa-mir-10a  | CDH18    | -0.49 |
| hsa-mir-10a  | RUNDC2B  | -0.43 |
| hsa-mir-10a  | SV2B     | -0.46 |
| hsa-mir-10a  | ZNF365   | -0.47 |
| hsa-mir-10b  | 11-Mar   | -0.65 |
| hsa-mir-10b  | A2BP1    | -0.55 |
| hsa-mir-10b  | AACS     | -0.62 |
| hsa-mir-10b  | ACVR1C   | -0.62 |



|             |           |       |
|-------------|-----------|-------|
| hsa-mir-10b | BRUNOL4   | -0.58 |
| hsa-mir-10b | C1QL3     | -0.64 |
| hsa-mir-10b | C20orf174 | -0.53 |
| hsa-mir-10b | C20orf177 | -0.54 |
| hsa-mir-10b | CAMK1G    | -0.58 |
| hsa-mir-10b | CARTPT    | -0.53 |
| hsa-mir-10b | CBLN4     | -0.61 |
| hsa-mir-10b | CDH12     | -0.69 |
| hsa-mir-10b | CDH7      | -0.65 |
| hsa-mir-10b | CDH8      | -0.52 |
| hsa-mir-10b | CDH9      | -0.66 |
| hsa-mir-10b | CHD5      | -0.49 |
| hsa-mir-10b | CHGA      | -0.49 |
| hsa-mir-10b | CIDEA     | -0.61 |
| hsa-mir-10b | CLEC2L    | -0.55 |
| hsa-mir-10b | CLSTN3    | -0.60 |
| hsa-mir-10b | CLTB      | -0.52 |
| hsa-mir-10b | CPLX2     | -0.57 |
| hsa-mir-10b | CSRP1     | -0.58 |
| hsa-mir-10b | CYP4X1    | -0.57 |
| hsa-mir-10b | DOC2A     | -0.58 |
| hsa-mir-10b | DRD1      | -0.61 |
| hsa-mir-10b | DRD1IP    | -0.60 |
| hsa-mir-10b | ENTPD3    | -0.55 |
| hsa-mir-10b | FAM108A3  | -0.43 |
| hsa-mir-10b | FAM122B   | 0.60  |
| hsa-mir-10b | GABRA1    | -0.59 |
| hsa-mir-10b | GABRA4    | -0.47 |
| hsa-mir-10b | GABRG2    | -0.58 |
| hsa-mir-10b | GJB6      | -0.57 |
| hsa-mir-10b | GNG3      | -0.40 |
| hsa-mir-10b | HAR1A     | -0.59 |
| hsa-mir-10b | HCN1      | -0.60 |
| hsa-mir-10b | HECW1     | -0.52 |
| hsa-mir-10b | HTR1E     | -0.62 |
| hsa-mir-10b | IL12RB2   | -0.65 |
| hsa-mir-10b | IQSEC3    | -0.62 |
| hsa-mir-10b | KCNB2     | -0.53 |
| hsa-mir-10b | KCNC2     | -0.53 |
| hsa-mir-10b | KCNV1     | -0.64 |
| hsa-mir-10b | KIAA1853  | -0.52 |
| hsa-mir-10b | KLHL1     | -0.52 |
| hsa-mir-10b | LOC400120 | -0.67 |
| hsa-mir-10b | LRRC7     | -0.63 |
| hsa-mir-10b | LRTM2     | -0.62 |
| hsa-mir-10b | MAP1A     | -0.51 |
| hsa-mir-10b | MAP1D     | 0.55  |
| hsa-mir-10b | MOAP1     | -0.53 |
| hsa-mir-10b | MPHOSPH8  | -0.46 |
| hsa-mir-10b | NEURL     | -0.55 |
| hsa-mir-10b | NPM2      | -0.58 |
| hsa-mir-10b | OMD       | -0.57 |
| hsa-mir-10b | OSM       | 0.56  |
| hsa-mir-10b | PCLO      | -0.63 |
| hsa-mir-10b | PPP2R2C   | -0.56 |
| hsa-mir-10b | PSD       | -0.65 |

|              |            |       |
|--------------|------------|-------|
| hsa-mir-10b  | PSMD4      | -0.56 |
| hsa-mir-10b  | PTPN5      | -0.49 |
| hsa-mir-10b  | RYR2       | -0.61 |
| hsa-mir-10b  | SERPINI1   | -0.62 |
| hsa-mir-10b  | SGPP2      | -0.50 |
| hsa-mir-10b  | SLC12A5    | -0.53 |
| hsa-mir-10b  | SLC17A7    | -0.62 |
| hsa-mir-10b  | SLC8A2     | -0.64 |
| hsa-mir-10b  | SNTB1      | 0.61  |
| hsa-mir-10b  | ST6GALNAC5 | -0.57 |
| hsa-mir-10b  | STK32C     | -0.52 |
| hsa-mir-10b  | STXBP6     | -0.58 |
| hsa-mir-10b  | SULT4A1    | -0.64 |
| hsa-mir-10b  | SV2B       | -0.53 |
| hsa-mir-10b  | SYT5       | -0.58 |
| hsa-mir-10b  | TMEM155    | -0.51 |
| hsa-mir-10b  | TMEM16C    | -0.54 |
| hsa-mir-10b  | TNNT2      | -0.65 |
| hsa-mir-10b  | TUBA4A     | -0.57 |
| hsa-mir-10b  | WSCD2      | -0.60 |
| hsa-mir-124a | ABHD12B    | 0.67  |
| hsa-mir-124a | ATP6V1A    | 0.62  |
| hsa-mir-124a | B3GNT4     | 0.62  |
| hsa-mir-124a | C16orf77   | 0.63  |
| hsa-mir-124a | C1QL3      | 0.74  |
| hsa-mir-124a | CBX6       | 0.55  |
| hsa-mir-124a | CCNY       | 0.63  |
| hsa-mir-124a | CDH12      | 0.77  |
| hsa-mir-124a | CENTA1     | 0.72  |
| hsa-mir-124a | CIDEA      | 0.66  |
| hsa-mir-124a | CLEC4G     | 0.75  |
| hsa-mir-124a | CNTN6      | 0.70  |
| hsa-mir-124a | COL10A1    | 0.62  |
| hsa-mir-124a | DDN        | 0.68  |
| hsa-mir-124a | DIXDC1     | 0.63  |
| hsa-mir-124a | DLG4       | 0.64  |
| hsa-mir-124a | DTNB       | 0.55  |
| hsa-mir-124a | EPHA10     | 0.71  |
| hsa-mir-124a | EXTL1      | 0.65  |
| hsa-mir-124a | FAM123C    | 0.73  |
| hsa-mir-124a | FBXW7      | 0.77  |
| hsa-mir-124a | GINS3      | -0.56 |
| hsa-mir-124a | GLCE       | 0.55  |
| hsa-mir-124a | GNG8       | 0.59  |
| hsa-mir-124a | HPCA       | 0.67  |
| hsa-mir-124a | HPCAL1     | 0.59  |
| hsa-mir-124a | HRH3       | 0.67  |
| hsa-mir-124a | HTR2C      | 0.67  |
| hsa-mir-124a | IL1F10     | 0.35  |
| hsa-mir-124a | KCNIP2     | 0.64  |
| hsa-mir-124a | KCNK12     | 0.66  |
| hsa-mir-124a | KCNN1      | 0.64  |
| hsa-mir-124a | KLK7       | 0.70  |
| hsa-mir-124a | LDB3       | 0.63  |
| hsa-mir-124a | LOC554175  | 0.81  |
| hsa-mir-124a | MAGEE1     | 0.64  |

|              |          |       |
|--------------|----------|-------|
| hsa-mir-124a | MAST3    | 0.73  |
| hsa-mir-124a | MEF2C    | 0.66  |
| hsa-mir-124a | MKL2     | 0.70  |
| hsa-mir-124a | MRPL19   | -0.46 |
| hsa-mir-124a | NAPB     | 0.77  |
| hsa-mir-124a | NDST2    | 0.55  |
| hsa-mir-124a | NY-REN-7 | 0.73  |
| hsa-mir-124a | PDE4A    | 0.62  |
| hsa-mir-124a | PDXP     | 0.64  |
| hsa-mir-124a | PEX5L    | 0.68  |
| hsa-mir-124a | PI4KA    | 0.67  |
| hsa-mir-124a | PNCK     | 0.78  |
| hsa-mir-124a | PRKCE    | 0.77  |
| hsa-mir-124a | PRRT1    | 0.69  |
| hsa-mir-124a | PSD      | 0.79  |
| hsa-mir-124a | PVRL1    | 0.50  |
| hsa-mir-124a | RAP2A    | 0.61  |
| hsa-mir-124a | RASAL1   | 0.73  |
| hsa-mir-124a | RASGEF1C | 0.71  |
| hsa-mir-124a | RBM32B   | 0.71  |
| hsa-mir-124a | RTN2     | 0.72  |
| hsa-mir-124a | RTN4RL1  | 0.76  |
| hsa-mir-124a | SH3GLB2  | 0.55  |
| hsa-mir-124a | SHOC2    | 0.66  |
| hsa-mir-124a | SLC1A1   | 0.68  |
| hsa-mir-124a | SLC1A6   | 0.65  |
| hsa-mir-124a | SNCG     | 0.75  |
| hsa-mir-124a | SPG3A    | 0.69  |
| hsa-mir-124a | SPRYD3   | 0.62  |
| hsa-mir-124a | SYNGR3   | 0.61  |
| hsa-mir-124a | VIPR1    | 0.61  |
| hsa-mir-125a | ARTS-1   | -0.49 |
| hsa-mir-125a | NUBPL    | -0.44 |
| hsa-mir-125b | ANKRD43  | -0.56 |
| hsa-mir-125b | CDKL5    | -0.48 |
| hsa-mir-125b | DNAJA4   | -0.57 |
| hsa-mir-125b | FLJ11151 | -0.60 |
| hsa-mir-125b | HSD17B4  | -0.33 |
| hsa-mir-125b | KCNK1    | -0.58 |
| hsa-mir-125b | MAP6     | -0.34 |
| hsa-mir-125b | NEFH     | -0.48 |
| hsa-mir-125b | SLC7A10  | -0.48 |
| hsa-mir-126  | ANKS3    | 0.60  |
| hsa-mir-126  | ARL5A    | -0.51 |
| hsa-mir-126  | ARVCF    | 0.61  |
| hsa-mir-126  | B4GALT4  | 0.52  |
| hsa-mir-126  | BTN2A1   | 0.63  |
| hsa-mir-126  | C17orf56 | 0.54  |
| hsa-mir-126  | C7orf20  | 0.49  |
| hsa-mir-126  | C8orf17  | 0.56  |
| hsa-mir-126  | CCDC97   | 0.61  |
| hsa-mir-126  | COX15    | -0.63 |
| hsa-mir-126  | DCP1A    | 0.68  |
| hsa-mir-126  | DDX27    | 0.57  |
| hsa-mir-126  | EVI1     | 0.64  |
| hsa-mir-126  | FBXL5    | -0.55 |

|              |           |       |
|--------------|-----------|-------|
| hsa-mir-126  | HSF1      | 0.62  |
| hsa-mir-126  | IK        | 0.48  |
| hsa-mir-126  | IQCE      | 0.58  |
| hsa-mir-126  | MLLT4     | 0.52  |
| hsa-mir-126  | OR6T1     | -0.55 |
| hsa-mir-126  | PLEKHH3   | 0.59  |
| hsa-mir-126  | PTCD1     | 0.65  |
| hsa-mir-126  | RBM6      | 0.48  |
| hsa-mir-126  | SRC       | 0.51  |
| hsa-mir-126  | TCAP      | 0.55  |
| hsa-mir-126  | TRIM58    | -0.45 |
| hsa-mir-126  | TSNAX     | -0.58 |
| hsa-mir-126  | UBE2D2    | -0.56 |
| hsa-mir-126  | ZNF124    | -0.55 |
| hsa-mir-126  | ZNF498    | 0.58  |
| hsa-mir-126* | ACTR10    | -0.51 |
| hsa-mir-126* | C4orf15   | 0.47  |
| hsa-mir-126* | CTAGE1    | -0.66 |
| hsa-mir-126* | DCTN5     | -0.54 |
| hsa-mir-126* | ETNK1     | -0.45 |
| hsa-mir-126* | FBXO24    | 0.64  |
| hsa-mir-126* | FLJ22795  | 0.54  |
| hsa-mir-126* | FLOT1     | -0.47 |
| hsa-mir-126* | HHAT      | 0.46  |
| hsa-mir-126* | PSMB9     | -0.50 |
| hsa-mir-126* | RGS9      | 0.60  |
| hsa-mir-126* | UBAC2     | -0.59 |
| hsa-mir-126* | ZNF509    | 0.43  |
| hsa-mir-127  | AGBL2     | -0.56 |
| hsa-mir-127  | ATP4B     | -0.63 |
| hsa-mir-127  | C1orf125  | -0.64 |
| hsa-mir-127  | ECHS1     | 0.58  |
| hsa-mir-127  | FAM119B   | -0.67 |
| hsa-mir-127  | FLJ22795  | -0.57 |
| hsa-mir-127  | FMNL1     | 0.64  |
| hsa-mir-127  | GJA5      | 0.56  |
| hsa-mir-127  | ISLR2     | 0.54  |
| hsa-mir-127  | KCNH5     | 0.67  |
| hsa-mir-127  | LOC441054 | -0.53 |
| hsa-mir-127  | PICK1     | 0.62  |
| hsa-mir-127  | QDPR      | 0.57  |
| hsa-mir-127  | SAMHD1    | 0.55  |
| hsa-mir-127  | SCGB2A1   | -0.55 |
| hsa-mir-127  | SIRPA     | 0.54  |
| hsa-mir-127  | SLC16A8   | 0.61  |
| hsa-mir-127  | SOX6      | -0.58 |
| hsa-mir-127  | UNC5C     | 0.56  |
| hsa-mir-127  | UROS      | 0.57  |
| hsa-mir-128a | 11-Mar    | 0.72  |
| hsa-mir-128a | 5-Sep     | 0.78  |
| hsa-mir-128a | ACTL6B    | 0.70  |
| hsa-mir-128a | ADAMTS9   | -0.60 |
| hsa-mir-128a | ANK1      | 0.69  |
| hsa-mir-128a | ANKRD34   | 0.77  |
| hsa-mir-128a | AP1GBP1   | -0.55 |
| hsa-mir-128a | BEX5      | 0.66  |

|              |           |       |
|--------------|-----------|-------|
| hsa-mir-128a | C1orf115  | 0.73  |
| hsa-mir-128a | CABP1     | 0.83  |
| hsa-mir-128a | CCDC128   | 0.69  |
| hsa-mir-128a | CLEC4G    | 0.66  |
| hsa-mir-128a | CLEC5A    | -0.58 |
| hsa-mir-128a | CORO6     | 0.81  |
| hsa-mir-128a | CXCR4     | -0.64 |
| hsa-mir-128a | DOC2A     | 0.76  |
| hsa-mir-128a | EIF4A2    | 0.62  |
| hsa-mir-128a | EPB49     | 0.74  |
| hsa-mir-128a | EPHB6     | 0.74  |
| hsa-mir-128a | FAAH      | 0.76  |
| hsa-mir-128a | FAM70A    | -0.63 |
| hsa-mir-128a | FBXW7     | 0.77  |
| hsa-mir-128a | FLJ37464  | 0.69  |
| hsa-mir-128a | GAST      | 0.69  |
| hsa-mir-128a | GLS       | 0.72  |
| hsa-mir-128a | GLS2      | 0.86  |
| hsa-mir-128a | GOT1      | 0.72  |
| hsa-mir-128a | GRIN1     | 0.71  |
| hsa-mir-128a | HPCA      | 0.73  |
| hsa-mir-128a | HPCAL1    | 0.69  |
| hsa-mir-128a | HRNBP3    | 0.81  |
| hsa-mir-128a | ICAM5     | 0.72  |
| hsa-mir-128a | INPP5F    | 0.75  |
| hsa-mir-128a | INSM2     | 0.78  |
| hsa-mir-128a | ITPR1     | 0.71  |
| hsa-mir-128a | KCNH3     | 0.73  |
| hsa-mir-128a | KCNK12    | 0.71  |
| hsa-mir-128a | KCNS1     | 0.75  |
| hsa-mir-128a | KIAA0748  | 0.76  |
| hsa-mir-128a | KIAA1324  | 0.70  |
| hsa-mir-128a | LHX6      | 0.71  |
| hsa-mir-128a | LOC133874 | 0.56  |
| hsa-mir-128a | LOC400451 | 0.68  |
| hsa-mir-128a | LRFN5     | 0.79  |
| hsa-mir-128a | MAL2      | 0.71  |
| hsa-mir-128a | MCHR2     | 0.81  |
| hsa-mir-128a | MMAA      | -0.68 |
| hsa-mir-128a | MSN       | -0.57 |
| hsa-mir-128a | NAPB      | 0.79  |
| hsa-mir-128a | NEUROD6   | 0.73  |
| hsa-mir-128a | NY-REN-7  | 0.78  |
| hsa-mir-128a | PDE1A     | 0.64  |
| hsa-mir-128a | PDXP      | 0.81  |
| hsa-mir-128a | PI4KA     | 0.75  |
| hsa-mir-128a | PLP2      | -0.65 |
| hsa-mir-128a | POPDC3    | 0.63  |
| hsa-mir-128a | PPA1      | 0.67  |
| hsa-mir-128a | PRMT8     | 0.73  |
| hsa-mir-128a | PRRT1     | 0.80  |
| hsa-mir-128a | PVALB     | 0.77  |
| hsa-mir-128a | RAB3A     | 0.72  |
| hsa-mir-128a | RAB40B    | 0.70  |
| hsa-mir-128a | RAPGEFL1  | 0.71  |
| hsa-mir-128a | RELL2     | 0.67  |

|              |          |       |
|--------------|----------|-------|
| hsa-mir-128a | RFPL1    | 0.76  |
| hsa-mir-128a | RFPL2    | 0.73  |
| hsa-mir-128a | RFPL3    | 0.75  |
| hsa-mir-128a | RTN4     | 0.71  |
| hsa-mir-128a | RTN4R    | 0.79  |
| hsa-mir-128a | RTN4RL1  | 0.79  |
| hsa-mir-128a | SDC3     | -0.58 |
| hsa-mir-128a | SH2D5    | 0.83  |
| hsa-mir-128a | SHANK2   | 0.69  |
| hsa-mir-128a | SLC1A6   | 0.71  |
| hsa-mir-128a | SLC26A8  | 0.76  |
| hsa-mir-128a | SNCA     | 0.74  |
| hsa-mir-128a | SPINT2   | 0.68  |
| hsa-mir-128a | STEAP3   | -0.63 |
| hsa-mir-128a | STK32A   | -0.56 |
| hsa-mir-128a | STX1A    | 0.78  |
| hsa-mir-128a | STXBP1   | 0.85  |
| hsa-mir-128a | STXBP6   | 0.65  |
| hsa-mir-128a | SUSD5    | 0.67  |
| hsa-mir-128a | SV2B     | 0.73  |
| hsa-mir-128a | SYNGR3   | 0.77  |
| hsa-mir-128a | TSEN34   | -0.61 |
| hsa-mir-128a | VIPR1    | 0.73  |
| hsa-mir-128a | WASF1    | 0.74  |
| hsa-mir-128a | XKR8     | -0.55 |
| hsa-mir-128a | YPEL4    | 0.77  |
| hsa-mir-128a | YWHAH    | 0.69  |
| hsa-mir-128a | ZNF606   | -0.58 |
| hsa-mir-128a | ZRANB1   | 0.71  |
| hsa-mir-128b | 5-Sep    | 0.80  |
| hsa-mir-128b | ADAM11   | 0.80  |
| hsa-mir-128b | AGPAT7   | 0.70  |
| hsa-mir-128b | ANKRD34  | 0.81  |
| hsa-mir-128b | ATP2B3   | 0.80  |
| hsa-mir-128b | ATRNL1   | 0.79  |
| hsa-mir-128b | BEX5     | 0.70  |
| hsa-mir-128b | BSCL2    | 0.63  |
| hsa-mir-128b | C13orf16 | 0.76  |
| hsa-mir-128b | C1QL3    | 0.72  |
| hsa-mir-128b | C1orf115 | 0.76  |
| hsa-mir-128b | C6orf117 | 0.58  |
| hsa-mir-128b | C6orf154 | 0.72  |
| hsa-mir-128b | C8orf47  | 0.69  |
| hsa-mir-128b | CAMK2A   | 0.78  |
| hsa-mir-128b | CCDC128  | 0.72  |
| hsa-mir-128b | CDH12    | 0.73  |
| hsa-mir-128b | CDKN2D   | 0.78  |
| hsa-mir-128b | CIDEA    | 0.80  |
| hsa-mir-128b | CLEC2L   | 0.79  |
| hsa-mir-128b | CNTNAP2  | 0.66  |
| hsa-mir-128b | CORO6    | 0.78  |
| hsa-mir-128b | CPNE9    | 0.81  |
| hsa-mir-128b | CRISPLD1 | -0.65 |
| hsa-mir-128b | CTXN3    | 0.81  |
| hsa-mir-128b | DOC2A    | 0.79  |
| hsa-mir-128b | DOK6     | 0.75  |

|              |           |       |
|--------------|-----------|-------|
| hsa-mir-128b | DPY19L3   | -0.56 |
| hsa-mir-128b | DRD5      | 0.55  |
| hsa-mir-128b | EIF4A2    | 0.65  |
| hsa-mir-128b | ENTPD3    | 0.66  |
| hsa-mir-128b | EPB49     | 0.75  |
| hsa-mir-128b | EPHB6     | 0.74  |
| hsa-mir-128b | FAAH      | 0.75  |
| hsa-mir-128b | FABP6     | 0.65  |
| hsa-mir-128b | FAM107B   | 0.63  |
| hsa-mir-128b | FAM19A2   | 0.81  |
| hsa-mir-128b | FAM70A    | -0.62 |
| hsa-mir-128b | FBXW7     | 0.81  |
| hsa-mir-128b | FLJ37464  | 0.70  |
| hsa-mir-128b | FREQ      | 0.71  |
| hsa-mir-128b | FSTL4     | 0.67  |
| hsa-mir-128b | GABRD     | 0.79  |
| hsa-mir-128b | GALNT9    | 0.79  |
| hsa-mir-128b | GAST      | 0.73  |
| hsa-mir-128b | GLS       | 0.76  |
| hsa-mir-128b | GLS2      | 0.87  |
| hsa-mir-128b | GNG8      | 0.66  |
| hsa-mir-128b | GOT1      | 0.72  |
| hsa-mir-128b | GRM7      | 0.77  |
| hsa-mir-128b | GUCY1B3   | 0.65  |
| hsa-mir-128b | HABP4     | 0.62  |
| hsa-mir-128b | HECW1     | 0.78  |
| hsa-mir-128b | HLF       | 0.69  |
| hsa-mir-128b | HOXB3     | -0.52 |
| hsa-mir-128b | HPCA      | 0.77  |
| hsa-mir-128b | HPRT1     | 0.61  |
| hsa-mir-128b | HRNBP3    | 0.84  |
| hsa-mir-128b | HTR1E     | 0.78  |
| hsa-mir-128b | ICAM5     | 0.74  |
| hsa-mir-128b | INPP5F    | 0.77  |
| hsa-mir-128b | KALRN     | 0.77  |
| hsa-mir-128b | KCNH3     | 0.76  |
| hsa-mir-128b | KCNJ12    | 0.71  |
| hsa-mir-128b | KCNJ4     | 0.68  |
| hsa-mir-128b | KCNK12    | 0.74  |
| hsa-mir-128b | KCNN1     | 0.73  |
| hsa-mir-128b | KCNS1     | 0.78  |
| hsa-mir-128b | KIAA0748  | 0.79  |
| hsa-mir-128b | KIAA1217  | 0.63  |
| hsa-mir-128b | KIAA1239  | 0.79  |
| hsa-mir-128b | KIAA1324  | 0.69  |
| hsa-mir-128b | KIAA1853  | 0.74  |
| hsa-mir-128b | LDB3      | 0.64  |
| hsa-mir-128b | LHX6      | 0.73  |
| hsa-mir-128b | LHX9      | -0.47 |
| hsa-mir-128b | LOC400120 | 0.74  |
| hsa-mir-128b | LOC400451 | 0.68  |
| hsa-mir-128b | LOC554175 | 0.81  |
| hsa-mir-128b | LRFN5     | 0.84  |
| hsa-mir-128b | MAGEE1    | 0.69  |
| hsa-mir-128b | MAST3     | 0.77  |
| hsa-mir-128b | MCHR2     | 0.83  |

|              |          |       |
|--------------|----------|-------|
| hsa-mir-128b | MICAL2   | 0.78  |
| hsa-mir-128b | MLLT11   | 0.64  |
| hsa-mir-128b | NAPB     | 0.82  |
| hsa-mir-128b | NBL1     | 0.62  |
| hsa-mir-128b | NCSTN    | -0.49 |
| hsa-mir-128b | NDEL1    | 0.79  |
| hsa-mir-128b | NPTN     | 0.76  |
| hsa-mir-128b | NSF      | 0.79  |
| hsa-mir-128b | NY-REN-7 | 0.79  |
| hsa-mir-128b | OBFC2B   | 0.58  |
| hsa-mir-128b | P2RX5    | 0.72  |
| hsa-mir-128b | PCLO     | 0.70  |
| hsa-mir-128b | PDE1A    | 0.66  |
| hsa-mir-128b | PDXP     | 0.81  |
| hsa-mir-128b | PI4KA    | 0.75  |
| hsa-mir-128b | PITPNM2  | 0.66  |
| hsa-mir-128b | PPA1     | 0.69  |
| hsa-mir-128b | PPP3CB   | 0.74  |
| hsa-mir-128b | PRMT8    | 0.76  |
| hsa-mir-128b | PRRT1    | 0.83  |
| hsa-mir-128b | PSD      | 0.79  |
| hsa-mir-128b | PSD3     | 0.71  |
| hsa-mir-128b | PTPRN    | 0.68  |
| hsa-mir-128b | PTPRR    | 0.69  |
| hsa-mir-128b | PTPRZ1   | -0.55 |
| hsa-mir-128b | PVALB    | 0.77  |
| hsa-mir-128b | RAB3A    | 0.74  |
| hsa-mir-128b | RAB40B   | 0.72  |
| hsa-mir-128b | RASAL1   | 0.71  |
| hsa-mir-128b | RBM32B   | 0.80  |
| hsa-mir-128b | RBP4     | 0.78  |
| hsa-mir-128b | RFPL1    | 0.78  |
| hsa-mir-128b | RFPL3    | 0.76  |
| hsa-mir-128b | RG57BP   | 0.69  |
| hsa-mir-128b | RSPO2    | 0.76  |
| hsa-mir-128b | RTN4     | 0.70  |
| hsa-mir-128b | RTN4R    | 0.81  |
| hsa-mir-128b | RTN4RL1  | 0.82  |
| hsa-mir-128b | RYR2     | 0.79  |
| hsa-mir-128b | SDC3     | -0.56 |
| hsa-mir-128b | SERPINI1 | 0.71  |
| hsa-mir-128b | SH2D5    | 0.84  |
| hsa-mir-128b | SH3GLB2  | 0.68  |
| hsa-mir-128b | SLC1A6   | 0.72  |
| hsa-mir-128b | SLC27A2  | 0.61  |
| hsa-mir-128b | SLC4A10  | 0.77  |
| hsa-mir-128b | SNCA     | 0.78  |
| hsa-mir-128b | SNCG     | 0.81  |
| hsa-mir-128b | SPG3A    | 0.71  |
| hsa-mir-128b | SPINT2   | 0.72  |
| hsa-mir-128b | SPTBN2   | 0.58  |
| hsa-mir-128b | STXBP1   | 0.85  |
| hsa-mir-128b | STXBP6   | 0.70  |
| hsa-mir-128b | SUSD5    | 0.69  |
| hsa-mir-128b | SYCE1    | 0.75  |
| hsa-mir-128b | SYNGR3   | 0.78  |



|              |          |       |
|--------------|----------|-------|
| hsa-mir-128b | TBR1     | 0.76  |
| hsa-mir-128b | THRB     | 0.65  |
| hsa-mir-128b | TMEM155  | 0.85  |
| hsa-mir-128b | TNNT2    | 0.77  |
| hsa-mir-128b | TRIM17   | 0.79  |
| hsa-mir-128b | TSEN34   | -0.62 |
| hsa-mir-128b | TSPYL1   | 0.74  |
| hsa-mir-128b | TUBA8    | 0.81  |
| hsa-mir-128b | UBE2D4   | -0.51 |
| hsa-mir-128b | VAMP2    | 0.75  |
| hsa-mir-128b | VIP      | 0.74  |
| hsa-mir-128b | VIPR1    | 0.75  |
| hsa-mir-128b | WASF1    | 0.76  |
| hsa-mir-128b | YPEL2    | 0.67  |
| hsa-mir-128b | YPEL4    | 0.77  |
| hsa-mir-128b | YWHAH    | 0.74  |
| hsa-mir-128b | ZNF606   | -0.56 |
| hsa-mir-128b | ZRANB1   | 0.69  |
| hsa-mir-129  | ACCN1    | 0.72  |
| hsa-mir-129  | ANKRD34  | 0.70  |
| hsa-mir-129  | ATP6V1A  | 0.69  |
| hsa-mir-129  | C19orf44 | -0.61 |
| hsa-mir-129  | C1QL3    | 0.79  |
| hsa-mir-129  | C6orf145 | -0.70 |
| hsa-mir-129  | CHSY-2   | 0.53  |
| hsa-mir-129  | COL4A6   | -0.65 |
| hsa-mir-129  | DACH2    | 0.73  |
| hsa-mir-129  | DRD5     | 0.77  |
| hsa-mir-129  | FAM19A2  | 0.72  |
| hsa-mir-129  | FAM79A   | 0.73  |
| hsa-mir-129  | FMNL1    | 0.64  |
| hsa-mir-129  | GPR83    | 0.76  |
| hsa-mir-129  | HPCA     | 0.77  |
| hsa-mir-129  | MAP1D    | -0.66 |
| hsa-mir-129  | MAPK9    | 0.59  |
| hsa-mir-129  | MC4R     | 0.76  |
| hsa-mir-129  | MOAP1    | 0.69  |
| hsa-mir-129  | NAPB     | 0.76  |
| hsa-mir-129  | PCDH11Y  | 0.75  |
| hsa-mir-129  | PDXP     | 0.69  |
| hsa-mir-129  | RBM32B   | 0.72  |
| hsa-mir-129  | RNF41    | 0.67  |
| hsa-mir-129  | RSPO2    | 0.73  |
| hsa-mir-129  | RXRG     | 0.59  |
| hsa-mir-129  | SLITRK5  | 0.51  |
| hsa-mir-129  | STK36    | -0.60 |
| hsa-mir-129  | SYCE1    | 0.75  |
| hsa-mir-129  | TLL1     | 0.62  |
| hsa-mir-129  | TPM3     | 0.73  |
| hsa-mir-130a | 9-Mar    | 0.47  |
| hsa-mir-130a | AKAP5    | -0.45 |
| hsa-mir-130a | CCT6A    | 0.50  |
| hsa-mir-130a | CDK4     | 0.48  |
| hsa-mir-130a | CHCHD2   | 0.50  |
| hsa-mir-130a | CHIC2    | 0.58  |
| hsa-mir-130a | GADD45G  | 0.67  |

|              |          |       |
|--------------|----------|-------|
| hsa-mir-130a | KHDRBS2  | -0.58 |
| hsa-mir-130a | LDOC1    | -0.57 |
| hsa-mir-130a | LMNB1    | 0.46  |
| hsa-mir-130a | MARS     | 0.43  |
| hsa-mir-130a | METTL1   | 0.47  |
| hsa-mir-130a | NAP1L2   | -0.64 |
| hsa-mir-130a | NKIRAS2  | 0.50  |
| hsa-mir-130a | OSBP2    | -0.57 |
| hsa-mir-130a | PAQR6    | -0.65 |
| hsa-mir-130a | PLEKHA6  | -0.57 |
| hsa-mir-130a | TBL2     | 0.58  |
| hsa-mir-130a | TGIF1    | 0.72  |
| hsa-mir-130a | TRIM58   | -0.65 |
| hsa-mir-130a | TSPAN31  | 0.49  |
| hsa-mir-130a | UBE2C    | 0.57  |
| hsa-mir-130b | C9orf4   | -0.67 |
| hsa-mir-130b | EPHX1    | -0.62 |
| hsa-mir-130b | HRASLS5  | -0.59 |
| hsa-mir-130b | MSRB2    | -0.68 |
| hsa-mir-130b | TGIF2    | 0.61  |
| hsa-mir-130b | THEM4    | -0.49 |
| hsa-mir-132  | CLEC4G   | 0.71  |
| hsa-mir-132  | DNM1     | 0.70  |
| hsa-mir-132  | FLJ39660 | -0.59 |
| hsa-mir-132  | FSTL4    | 0.73  |
| hsa-mir-132  | GAST     | 0.68  |
| hsa-mir-132  | MRPL19   | -0.45 |
| hsa-mir-132  | NFE2L3   | -0.48 |
| hsa-mir-132  | PNCK     | 0.66  |
| hsa-mir-132  | RTN4R    | 0.60  |
| hsa-mir-132  | ZNF284   | -0.58 |
| hsa-mir-132  | ZNF804A  | 0.51  |
| hsa-mir-133a | HADHA    | -0.62 |
| hsa-mir-133a | PIP4K2B  | 0.65  |
| hsa-mir-133a | TSPAN12  | -0.57 |
| hsa-mir-133b | F12      | 0.64  |
| hsa-mir-133b | FGF18    | 0.68  |
| hsa-mir-133b | FOXD4L2  | 0.60  |
| hsa-mir-133b | PGLS     | -0.53 |
| hsa-mir-133b | SRrp35   | 0.45  |
| hsa-mir-134  | C9orf58  | 0.71  |
| hsa-mir-134  | LRRC23   | -0.58 |
| hsa-mir-135a | DRD5     | -0.51 |
| hsa-mir-135a | ELOVL7   | -0.37 |
| hsa-mir-135a | IQCG     | 0.69  |
| hsa-mir-135a | MDFIC    | 0.63  |
| hsa-mir-135a | SOHLH2   | 0.61  |
| hsa-mir-135a | TMED4    | 0.59  |
| hsa-mir-135a | TMEM10   | -0.45 |
| hsa-mir-135a | TMEM107  | 0.74  |
| hsa-mir-135b | ALDH3A1  | -0.70 |
| hsa-mir-135b | TMEM55B  | -0.65 |
| hsa-mir-136  | ABT1     | -0.66 |
| hsa-mir-136  | ACOT7    | 0.65  |
| hsa-mir-136  | ADAM11   | 0.65  |
| hsa-mir-136  | AK5      | 0.64  |

|             |          |       |
|-------------|----------|-------|
| hsa-mir-136 | ATP6V0C  | 0.67  |
| hsa-mir-136 | CAMK2G   | 0.61  |
| hsa-mir-136 | CBLN1    | 0.65  |
| hsa-mir-136 | CDCA2    | -0.49 |
| hsa-mir-136 | CPEB3    | 0.54  |
| hsa-mir-136 | CPNE6    | 0.53  |
| hsa-mir-136 | DACH2    | 0.59  |
| hsa-mir-136 | DAGLB    | 0.61  |
| hsa-mir-136 | DYSF     | 0.59  |
| hsa-mir-136 | EZH2     | -0.58 |
| hsa-mir-136 | FAM64A   | -0.51 |
| hsa-mir-136 | GPR143   | 0.62  |
| hsa-mir-136 | HEY1     | -0.52 |
| hsa-mir-136 | KIF5A    | 0.49  |
| hsa-mir-136 | KNTC1    | -0.62 |
| hsa-mir-136 | LARP6    | 0.54  |
| hsa-mir-136 | LHPP     | 0.61  |
| hsa-mir-136 | MAB21L1  | -0.58 |
| hsa-mir-136 | MEX3A    | -0.46 |
| hsa-mir-136 | MGC10850 | 0.68  |
| hsa-mir-136 | NUAK1    | 0.64  |
| hsa-mir-136 | PAIP2B   | 0.68  |
| hsa-mir-136 | PAOX     | 0.72  |
| hsa-mir-136 | PFAS     | -0.50 |
| hsa-mir-136 | POLG     | -0.51 |
| hsa-mir-136 | PRC1     | -0.51 |
| hsa-mir-136 | RPE65    | -0.45 |
| hsa-mir-136 | SIRPA    | 0.63  |
| hsa-mir-136 | SOX11    | -0.51 |
| hsa-mir-136 | SOX4     | -0.46 |
| hsa-mir-136 | SST      | 0.48  |
| hsa-mir-136 | STYK1    | 0.69  |
| hsa-mir-136 | SYCP3    | 0.45  |
| hsa-mir-136 | TEF      | 0.70  |
| hsa-mir-136 | THTPA    | 0.48  |
| hsa-mir-137 | 5-Sep    | 0.80  |
| hsa-mir-137 | ACTN2    | 0.51  |
| hsa-mir-137 | AP3B2    | 0.76  |
| hsa-mir-137 | APBB1    | 0.70  |
| hsa-mir-137 | ATP1B1   | 0.67  |
| hsa-mir-137 | BRSK2    | 0.72  |
| hsa-mir-137 | C6orf136 | 0.64  |
| hsa-mir-137 | C6orf154 | 0.66  |
| hsa-mir-137 | CASP3    | -0.59 |
| hsa-mir-137 | CCDC139  | -0.63 |
| hsa-mir-137 | CCDC92   | 0.68  |
| hsa-mir-137 | CENTA1   | 0.75  |
| hsa-mir-137 | CHIC1    | 0.63  |
| hsa-mir-137 | CNKSR2   | 0.79  |
| hsa-mir-137 | CORO6    | 0.68  |
| hsa-mir-137 | DGKZ     | 0.61  |
| hsa-mir-137 | GALNT9   | 0.78  |
| hsa-mir-137 | GPRASP1  | 0.71  |
| hsa-mir-137 | HPCAL1   | 0.57  |
| hsa-mir-137 | HRH3     | 0.78  |
| hsa-mir-137 | INPP5F   | 0.75  |

|             |           |       |
|-------------|-----------|-------|
| hsa-mir-137 | KCNAB1    | 0.77  |
| hsa-mir-137 | KCNH3     | 0.81  |
| hsa-mir-137 | KIAA1183  | 0.80  |
| hsa-mir-137 | KLK7      | 0.67  |
| hsa-mir-137 | MAGEE1    | 0.73  |
| hsa-mir-137 | NDST2     | 0.46  |
| hsa-mir-137 | PH-4      | 0.68  |
| hsa-mir-137 | PI4KA     | 0.74  |
| hsa-mir-137 | PREPL     | 0.68  |
| hsa-mir-137 | PSD       | 0.80  |
| hsa-mir-137 | PTPN5     | 0.71  |
| hsa-mir-137 | RBP4      | 0.63  |
| hsa-mir-137 | RUSC2     | 0.63  |
| hsa-mir-137 | SLC26A8   | 0.74  |
| hsa-mir-137 | SNCG      | 0.70  |
| hsa-mir-137 | SPRN      | 0.64  |
| hsa-mir-137 | STEAP2    | 0.68  |
| hsa-mir-137 | SYCE1     | 0.76  |
| hsa-mir-137 | SYNGR3    | 0.65  |
| hsa-mir-137 | TMTC1     | 0.61  |
| hsa-mir-137 | USP43     | 0.60  |
| hsa-mir-137 | VAMP2     | 0.77  |
| hsa-mir-138 | A2BP1     | 0.70  |
| hsa-mir-138 | ABCG4     | 0.73  |
| hsa-mir-138 | ANKRD26   | 0.45  |
| hsa-mir-138 | ANKRD43   | 0.79  |
| hsa-mir-138 | ARHGEF12  | 0.52  |
| hsa-mir-138 | ATP2B3    | 0.77  |
| hsa-mir-138 | B4GALT6   | 0.75  |
| hsa-mir-138 | BCL2L10   | 0.71  |
| hsa-mir-138 | BEGAIN    | 0.69  |
| hsa-mir-138 | BRUNOL5   | 0.80  |
| hsa-mir-138 | C14orf162 | 0.62  |
| hsa-mir-138 | C16orf77  | 0.70  |
| hsa-mir-138 | C1QL3     | 0.76  |
| hsa-mir-138 | C20orf174 | 0.73  |
| hsa-mir-138 | C2orf55   | 0.76  |
| hsa-mir-138 | C5orf40   | 0.76  |
| hsa-mir-138 | C6orf154  | 0.71  |
| hsa-mir-138 | C6orf65   | 0.61  |
| hsa-mir-138 | CACNG3    | 0.72  |
| hsa-mir-138 | CAMK2A    | 0.74  |
| hsa-mir-138 | CBLN2     | 0.64  |
| hsa-mir-138 | CHIC1     | 0.67  |
| hsa-mir-138 | CNKSR2    | 0.76  |
| hsa-mir-138 | CPLX2     | 0.68  |
| hsa-mir-138 | CTXN1     | 0.62  |
| hsa-mir-138 | DLGAP2    | 0.85  |
| hsa-mir-138 | DMXL2     | 0.59  |
| hsa-mir-138 | DOC2A     | 0.64  |
| hsa-mir-138 | EFCBP2    | 0.67  |
| hsa-mir-138 | ELOVL7    | 0.65  |
| hsa-mir-138 | EMP1      | -0.50 |
| hsa-mir-138 | FAM131A   | 0.71  |
| hsa-mir-138 | FAM19A2   | 0.78  |
| hsa-mir-138 | FAM81A    | 0.63  |

|             |           |       |
|-------------|-----------|-------|
| hsa-mir-138 | FBXW7     | 0.79  |
| hsa-mir-138 | FLJ33534  | 0.74  |
| hsa-mir-138 | FSTL5     | 0.71  |
| hsa-mir-138 | GABRA1    | 0.66  |
| hsa-mir-138 | GABRA4    | 0.62  |
| hsa-mir-138 | GABRG1    | 0.70  |
| hsa-mir-138 | GNG3      | 0.64  |
| hsa-mir-138 | GPR83     | 0.77  |
| hsa-mir-138 | GPRASP1   | 0.73  |
| hsa-mir-138 | GPRASP2   | 0.73  |
| hsa-mir-138 | GRIN3A    | 0.75  |
| hsa-mir-138 | GRM7      | 0.80  |
| hsa-mir-138 | HCN1      | 0.70  |
| hsa-mir-138 | HDGFRP3   | 0.67  |
| hsa-mir-138 | HYAL2     | -0.59 |
| hsa-mir-138 | ITPR1     | 0.78  |
| hsa-mir-138 | KALRN     | 0.76  |
| hsa-mir-138 | KCNC2     | 0.69  |
| hsa-mir-138 | KCNIP4    | 0.67  |
| hsa-mir-138 | KCNJ6     | 0.58  |
| hsa-mir-138 | KIF5A     | 0.77  |
| hsa-mir-138 | KLHL2     | 0.71  |
| hsa-mir-138 | KLK7      | 0.76  |
| hsa-mir-138 | LMO7      | 0.73  |
| hsa-mir-138 | LOC552889 | 0.75  |
| hsa-mir-138 | LOC554175 | 0.76  |
| hsa-mir-138 | LOC728215 | 0.77  |
| hsa-mir-138 | LONRF3    | -0.54 |
| hsa-mir-138 | LRFN5     | 0.73  |
| hsa-mir-138 | LRP11     | 0.66  |
| hsa-mir-138 | LRTM2     | 0.71  |
| hsa-mir-138 | MAGEE1    | 0.72  |
| hsa-mir-138 | MAP2K1    | 0.75  |
| hsa-mir-138 | MCHR2     | 0.79  |
| hsa-mir-138 | MEF2C     | 0.71  |
| hsa-mir-138 | MRPL24    | -0.49 |
| hsa-mir-138 | MYT1L     | 0.77  |
| hsa-mir-138 | NAP1L3    | 0.73  |
| hsa-mir-138 | NAPB      | 0.74  |
| hsa-mir-138 | NAV3      | 0.67  |
| hsa-mir-138 | NES       | -0.62 |
| hsa-mir-138 | NPY1R     | 0.74  |
| hsa-mir-138 | ODZ2      | 0.64  |
| hsa-mir-138 | OXGR1     | 0.78  |
| hsa-mir-138 | PABPC5    | 0.54  |
| hsa-mir-138 | PAK6      | 0.68  |
| hsa-mir-138 | PCSK2     | 0.72  |
| hsa-mir-138 | PDE1B     | 0.74  |
| hsa-mir-138 | PPFIA4    | 0.66  |
| hsa-mir-138 | PRMT8     | 0.78  |
| hsa-mir-138 | PSD       | 0.76  |
| hsa-mir-138 | PSD3      | 0.76  |
| hsa-mir-138 | PTPDC1    | 0.51  |
| hsa-mir-138 | RAPGEF4   | 0.80  |
| hsa-mir-138 | RHOC      | -0.71 |
| hsa-mir-138 | RIMBP2    | 0.80  |

|             |          |       |
|-------------|----------|-------|
| hsa-mir-138 | RIMS1    | 0.76  |
| hsa-mir-138 | RIMS2    | 0.73  |
| hsa-mir-138 | RSPO3    | 0.72  |
| hsa-mir-138 | SCTR     | 0.55  |
| hsa-mir-138 | SGPP2    | 0.79  |
| hsa-mir-138 | SGSM1    | 0.77  |
| hsa-mir-138 | SHANK2   | 0.75  |
| hsa-mir-138 | SIRT1    | 0.63  |
| hsa-mir-138 | SLC45A4  | 0.72  |
| hsa-mir-138 | SLITRK1  | 0.78  |
| hsa-mir-138 | SPRR2G   | 0.57  |
| hsa-mir-138 | SSTR5    | 0.60  |
| hsa-mir-138 | SSX2IP   | 0.63  |
| hsa-mir-138 | STOX2    | 0.63  |
| hsa-mir-138 | SYNJ1    | 0.69  |
| hsa-mir-138 | SYNPR    | 0.65  |
| hsa-mir-138 | SYT1     | 0.66  |
| hsa-mir-138 | TAS2R50  | 0.66  |
| hsa-mir-138 | TBC1D9   | 0.71  |
| hsa-mir-138 | TBRG1    | 0.61  |
| hsa-mir-138 | TM6SF1   | 0.69  |
| hsa-mir-138 | TNRC4    | 0.70  |
| hsa-mir-138 | TRIM23   | 0.68  |
| hsa-mir-138 | TRIM37   | 0.63  |
| hsa-mir-138 | TSPYL1   | 0.72  |
| hsa-mir-138 | TSPYL4   | 0.72  |
| hsa-mir-138 | USP11    | 0.57  |
| hsa-mir-138 | YWHAH    | 0.65  |
| hsa-mir-138 | ZNF25    | 0.68  |
| hsa-mir-139 | 5-Sep    | 0.73  |
| hsa-mir-139 | AASS     | -0.60 |
| hsa-mir-139 | ACOT4    | 0.57  |
| hsa-mir-139 | ACTL6B   | 0.73  |
| hsa-mir-139 | ADAMTS19 | 0.65  |
| hsa-mir-139 | ADAMTS9  | -0.60 |
| hsa-mir-139 | AGBL2    | -0.52 |
| hsa-mir-139 | AGPAT7   | 0.70  |
| hsa-mir-139 | ANKRD34  | 0.82  |
| hsa-mir-139 | ANKRD43  | 0.78  |
| hsa-mir-139 | APOLD1   | -0.25 |
| hsa-mir-139 | ARRB1    | 0.71  |
| hsa-mir-139 | ATP6V0C  | 0.70  |
| hsa-mir-139 | ATP6V0D1 | 0.57  |
| hsa-mir-139 | ATP6V1A  | 0.67  |
| hsa-mir-139 | ATRNL1   | 0.69  |
| hsa-mir-139 | BEGAIN   | 0.69  |
| hsa-mir-139 | BRUNOL5  | 0.70  |
| hsa-mir-139 | BTN2A2   | -0.64 |
| hsa-mir-139 | C16orf48 | -0.46 |
| hsa-mir-139 | C19orf18 | -0.56 |
| hsa-mir-139 | C1QL3    | 0.80  |
| hsa-mir-139 | C1orf115 | 0.74  |
| hsa-mir-139 | C1orf96  | 0.50  |
| hsa-mir-139 | C6orf154 | 0.67  |
| hsa-mir-139 | CA3      | -0.56 |
| hsa-mir-139 | CACNB1   | 0.72  |

|             |          |       |
|-------------|----------|-------|
| hsa-mir-139 | CAMK2A   | 0.77  |
| hsa-mir-139 | CAMKV    | 0.77  |
| hsa-mir-139 | CAPS     | -0.45 |
| hsa-mir-139 | CCDC128  | 0.76  |
| hsa-mir-139 | CCDC52   | -0.69 |
| hsa-mir-139 | CENTA1   | 0.74  |
| hsa-mir-139 | CNNM2    | 0.55  |
| hsa-mir-139 | CNTN6    | 0.70  |
| hsa-mir-139 | COL4A6   | -0.69 |
| hsa-mir-139 | CPOX     | 0.54  |
| hsa-mir-139 | CRYBB1   | 0.56  |
| hsa-mir-139 | CUL2     | 0.64  |
| hsa-mir-139 | CXCR7    | -0.65 |
| hsa-mir-139 | DACH2    | 0.80  |
| hsa-mir-139 | DDN      | 0.85  |
| hsa-mir-139 | DGKZ     | 0.69  |
| hsa-mir-139 | DHCR24   | 0.52  |
| hsa-mir-139 | DOK6     | 0.79  |
| hsa-mir-139 | DPYSL3   | -0.66 |
| hsa-mir-139 | EDG2     | 0.55  |
| hsa-mir-139 | EDIL3    | 0.62  |
| hsa-mir-139 | EEF1A2   | 0.64  |
| hsa-mir-139 | EGR3     | 0.57  |
| hsa-mir-139 | ELMO1    | 0.67  |
| hsa-mir-139 | ELOVL7   | 0.69  |
| hsa-mir-139 | EMP1     | -0.69 |
| hsa-mir-139 | EXOC6    | 0.55  |
| hsa-mir-139 | EXTL1    | 0.75  |
| hsa-mir-139 | FAAH     | 0.72  |
| hsa-mir-139 | FAM102B  | 0.61  |
| hsa-mir-139 | FAM19A4  | 0.71  |
| hsa-mir-139 | FAM79A   | 0.74  |
| hsa-mir-139 | FCHO1    | 0.75  |
| hsa-mir-139 | FGFBP2   | -0.48 |
| hsa-mir-139 | FLJ33534 | 0.67  |
| hsa-mir-139 | FMNL1    | 0.62  |
| hsa-mir-139 | GABRA2   | 0.64  |
| hsa-mir-139 | GJB6     | 0.70  |
| hsa-mir-139 | GPR83    | 0.76  |
| hsa-mir-139 | GRM4     | 0.70  |
| hsa-mir-139 | GRM7     | 0.70  |
| hsa-mir-139 | GUCY1A3  | 0.62  |
| hsa-mir-139 | GUCY1B3  | 0.70  |
| hsa-mir-139 | HIG2     | -0.56 |
| hsa-mir-139 | HPCA     | 0.78  |
| hsa-mir-139 | HPCAL1   | 0.78  |
| hsa-mir-139 | HPRT1    | 0.71  |
| hsa-mir-139 | HS3ST5   | 0.67  |
| hsa-mir-139 | HTR2C    | 0.77  |
| hsa-mir-139 | IL17RD   | -0.60 |
| hsa-mir-139 | INPP5F   | 0.77  |
| hsa-mir-139 | IQCF3    | 0.62  |
| hsa-mir-139 | ITGB8    | -0.63 |
| hsa-mir-139 | ITPKA    | 0.75  |
| hsa-mir-139 | ITPR1    | 0.64  |
| hsa-mir-139 | KCNB2    | 0.73  |

|             |           |       |
|-------------|-----------|-------|
| hsa-mir-139 | KCNH3     | 0.72  |
| hsa-mir-139 | KCNIP4    | 0.53  |
| hsa-mir-139 | KCNJ14    | -0.46 |
| hsa-mir-139 | KCNK12    | 0.78  |
| hsa-mir-139 | KCNS1     | 0.75  |
| hsa-mir-139 | KIAA0748  | 0.81  |
| hsa-mir-139 | KIAA1324  | 0.64  |
| hsa-mir-139 | KLHL2     | 0.66  |
| hsa-mir-139 | KLK5      | 0.69  |
| hsa-mir-139 | LAMB2     | -0.65 |
| hsa-mir-139 | LFNG      | -0.65 |
| hsa-mir-139 | LHX6      | 0.75  |
| hsa-mir-139 | LMO7      | 0.74  |
| hsa-mir-139 | LOC400120 | 0.69  |
| hsa-mir-139 | LOC554175 | 0.78  |
| hsa-mir-139 | LRRTM4    | 0.55  |
| hsa-mir-139 | MAGEE1    | 0.70  |
| hsa-mir-139 | MAP1A     | 0.66  |
| hsa-mir-139 | MAST3     | 0.83  |
| hsa-mir-139 | MATK      | 0.84  |
| hsa-mir-139 | MCTP1     | 0.49  |
| hsa-mir-139 | MEF2C     | 0.69  |
| hsa-mir-139 | MLLT11    | 0.65  |
| hsa-mir-139 | NBL1      | 0.75  |
| hsa-mir-139 | NDEL1     | 0.77  |
| hsa-mir-139 | NDST2     | 0.67  |
| hsa-mir-139 | NEUROD6   | 0.72  |
| hsa-mir-139 | NGB       | 0.79  |
| hsa-mir-139 | OAF       | 0.67  |
| hsa-mir-139 | OR5AP2    | -0.33 |
| hsa-mir-139 | OSMR      | -0.65 |
| hsa-mir-139 | PAK1      | 0.63  |
| hsa-mir-139 | PAX3      | -0.56 |
| hsa-mir-139 | PDDC1     | -0.42 |
| hsa-mir-139 | PDE1A     | 0.72  |
| hsa-mir-139 | PDE1B     | 0.77  |
| hsa-mir-139 | PIP3-E    | 0.74  |
| hsa-mir-139 | PLEKHA1   | 0.77  |
| hsa-mir-139 | PNCK      | 0.84  |
| hsa-mir-139 | POFUT2    | -0.67 |
| hsa-mir-139 | PPA1      | 0.79  |
| hsa-mir-139 | PPP3CB    | 0.80  |
| hsa-mir-139 | PRKCQ     | 0.72  |
| hsa-mir-139 | PTPRZ1    | -0.57 |
| hsa-mir-139 | RAB27B    | 0.68  |
| hsa-mir-139 | RAB3A     | 0.68  |
| hsa-mir-139 | RAB40B    | 0.74  |
| hsa-mir-139 | RASGRF2   | 0.80  |
| hsa-mir-139 | RBM32B    | 0.82  |
| hsa-mir-139 | RBP4      | 0.80  |
| hsa-mir-139 | RDHE2     | 0.81  |
| hsa-mir-139 | RFPL1     | 0.78  |
| hsa-mir-139 | RFPL3     | 0.73  |
| hsa-mir-139 | RIT2      | 0.41  |
| hsa-mir-139 | RNF41     | 0.74  |
| hsa-mir-139 | RSPO2     | 0.77  |



|                |          |       |
|----------------|----------|-------|
| hsa-mir-139    | RTN4R    | 0.78  |
| hsa-mir-139    | RUNDC3A  | 0.77  |
| hsa-mir-139    | RUSC1    | 0.57  |
| hsa-mir-139    | SELM     | 0.49  |
| hsa-mir-139    | SEMA4D   | 0.64  |
| hsa-mir-139    | SERPINI1 | 0.75  |
| hsa-mir-139    | SH2D5    | 0.71  |
| hsa-mir-139    | SLC25A28 | 0.66  |
| hsa-mir-139    | SLC27A2  | 0.71  |
| hsa-mir-139    | SLC35F2  | -0.64 |
| hsa-mir-139    | SLC6A15  | 0.79  |
| hsa-mir-139    | SOHLH2   | -0.63 |
| hsa-mir-139    | SPINT2   | 0.74  |
| hsa-mir-139    | SSTR2    | 0.66  |
| hsa-mir-139    | SSX2IP   | 0.63  |
| hsa-mir-139    | STAT4    | 0.79  |
| hsa-mir-139    | STK33    | -0.76 |
| hsa-mir-139    | STX1A    | 0.79  |
| hsa-mir-139    | STXBP5   | 0.73  |
| hsa-mir-139    | SYP      | 0.73  |
| hsa-mir-139    | THRB     | 0.60  |
| hsa-mir-139    | TMEFF2   | 0.71  |
| hsa-mir-139    | TMEM155  | 0.79  |
| hsa-mir-139    | TNIP3    | 0.56  |
| hsa-mir-139    | TNNT2    | 0.81  |
| hsa-mir-139    | TPM3     | 0.74  |
| hsa-mir-139    | TRPM2    | 0.63  |
| hsa-mir-139    | TSEN34   | -0.60 |
| hsa-mir-139    | UNC13C   | 0.76  |
| hsa-mir-139    | UNC5C    | 0.59  |
| hsa-mir-139    | UROS     | 0.63  |
| hsa-mir-139    | VAMP2    | 0.69  |
| hsa-mir-139    | WBSCR16  | -0.51 |
| hsa-mir-139    | YPEL2    | 0.72  |
| hsa-mir-139    | YWHAH    | 0.78  |
| hsa-mir-139    | ZNF521   | -0.54 |
| hsa-mir-139    | ZNF702   | 0.66  |
| hsa-mir-139    | ZRANB1   | 0.76  |
| hsa-mir-140    | GNG5     | -0.41 |
| hsa-mir-140    | TSNAX    | -0.41 |
| hsa-mir-142-3p | C10orf97 | -0.65 |
| hsa-mir-142-3p | FIG4     | -0.55 |
| hsa-mir-142-3p | HACE1    | -0.62 |
| hsa-mir-142-3p | IDI1     | -0.71 |
| hsa-mir-142-3p | PCMT1    | -0.57 |
| hsa-mir-142-3p | PRNPIP   | -0.51 |
| hsa-mir-142-3p | SLC26A4  | -0.57 |
| hsa-mir-142-3p | YWHAQ    | -0.61 |
| hsa-mir-142-5p | U2AF1L4  | -0.55 |
| hsa-mir-142-5p | YWHAQ    | -0.52 |
| hsa-mir-142-5p | ZNF294   | -0.55 |
| hsa-mir-143    | ARFIP1   | -0.54 |
| hsa-mir-143    | BTN3A3   | -0.50 |
| hsa-mir-143    | DCST1    | 0.39  |
| hsa-mir-143    | HIPK3    | -0.56 |
| hsa-mir-143    | HIST1H4C | -0.59 |

|              |          |       |
|--------------|----------|-------|
| hsa-mir-143  | HIST1H4D | -0.59 |
| hsa-mir-143  | LOC92017 | 0.54  |
| hsa-mir-143  | THSD4    | 0.67  |
| hsa-mir-143  | ZNF589   | 0.54  |
| hsa-mir-145  | EYA1     | 0.46  |
| hsa-mir-146a | CCDC136  | 0.50  |
| hsa-mir-146a | CST7     | -0.50 |
| hsa-mir-146a | LOR      | -0.52 |
| hsa-mir-146a | SAP30    | 0.52  |
| hsa-mir-146b | PHLDB2   | -0.42 |
| hsa-mir-148a | ACSL4    | -0.66 |
| hsa-mir-148a | AKAP5    | -0.54 |
| hsa-mir-148a | C6orf145 | 0.69  |
| hsa-mir-148a | CDC42SE2 | -0.48 |
| hsa-mir-148a | CFL2     | -0.53 |
| hsa-mir-148a | EIF4A2   | -0.50 |
| hsa-mir-148a | EXOC6    | -0.64 |
| hsa-mir-148a | FAM102B  | -0.63 |
| hsa-mir-148a | FAM119B  | 0.58  |
| hsa-mir-148a | FAM19A2  | -0.38 |
| hsa-mir-148a | FMNL1    | -0.50 |
| hsa-mir-148a | GPR137B  | 0.74  |
| hsa-mir-148a | MAPK6    | -0.58 |
| hsa-mir-148a | MAPK9    | -0.51 |
| hsa-mir-148a | NNT      | -0.51 |
| hsa-mir-148a | OXCT2    | -0.63 |
| hsa-mir-148a | PIP5K1B  | -0.47 |
| hsa-mir-148a | SOHLH2   | 0.59  |
| hsa-mir-148a | SRGAP1   | 0.58  |
| hsa-mir-148a | STAT4    | -0.55 |
| hsa-mir-148a | UNC13C   | -0.69 |
| hsa-mir-148a | WDR47    | -0.58 |
| hsa-mir-148b | AMACR    | -0.52 |
| hsa-mir-148b | CXorf57  | -0.41 |
| hsa-mir-149  | ABCA1    | -0.59 |
| hsa-mir-149  | APOBEC3F | -0.53 |
| hsa-mir-149  | ASAH1    | -0.63 |
| hsa-mir-149  | DUSP1    | -0.61 |
| hsa-mir-149  | DUSP18   | -0.47 |
| hsa-mir-149  | FLJ20273 | -0.65 |
| hsa-mir-149  | MC4R     | 0.46  |
| hsa-mir-149  | MFSD3    | 0.50  |
| hsa-mir-149  | PDGFC    | -0.49 |
| hsa-mir-149  | RNF145   | -0.55 |
| hsa-mir-149  | RP2      | -0.50 |
| hsa-mir-149  | SLC6A20  | 0.57  |
| hsa-mir-149  | SMCR7    | 0.54  |
| hsa-mir-151  | CAPN13   | 0.53  |
| hsa-mir-151  | COG2     | -0.37 |
| hsa-mir-151  | CYP20A1  | -0.55 |
| hsa-mir-151  | DACT3    | 0.60  |
| hsa-mir-151  | GALNT14  | 0.56  |
| hsa-mir-151  | HRC      | 0.62  |
| hsa-mir-152  | ABHD7    | -0.55 |
| hsa-mir-152  | BTBD14A  | 0.49  |
| hsa-mir-152  | C1orf125 | 0.62  |

|              |          |       |
|--------------|----------|-------|
| hsa-mir-152  | CD247    | -0.53 |
| hsa-mir-152  | CNTN6    | -0.52 |
| hsa-mir-152  | GPLY     | -0.49 |
| hsa-mir-152  | GUCY1B3  | -0.61 |
| hsa-mir-152  | HPRT1    | -0.51 |
| hsa-mir-152  | IFI44L   | -0.34 |
| hsa-mir-152  | MAPK6    | -0.51 |
| hsa-mir-152  | PPP3CB   | -0.57 |
| hsa-mir-152  | RNF111   | -0.57 |
| hsa-mir-152  | SAMHD1   | -0.51 |
| hsa-mir-152  | ZNF702   | -0.63 |
| hsa-mir-154  | ACTL6A   | -0.69 |
| hsa-mir-154  | C2orf28  | -0.43 |
| hsa-mir-154  | NUDT1    | -0.63 |
| hsa-mir-154  | RELL2    | 0.60  |
| hsa-mir-154  | SLC6A17  | 0.67  |
| hsa-mir-154* | ABCC5    | 0.57  |
| hsa-mir-154* | BRSK2    | 0.71  |
| hsa-mir-154* | CENTA1   | 0.70  |
| hsa-mir-154* | DUSP8    | 0.61  |
| hsa-mir-154* | FOXD4L2  | 0.63  |
| hsa-mir-154* | GIT1     | 0.62  |
| hsa-mir-154* | GNG12    | -0.59 |
| hsa-mir-154* | IGSF8    | 0.58  |
| hsa-mir-154* | KCNIP2   | 0.72  |
| hsa-mir-154* | KCNS1    | 0.69  |
| hsa-mir-154* | KIF5A    | 0.61  |
| hsa-mir-154* | NCDN     | 0.74  |
| hsa-mir-154* | TSPAN6   | -0.57 |
| hsa-mir-154* | USP11    | 0.71  |
| hsa-mir-154* | WDR12    | -0.51 |
| hsa-mir-154* | ZNF536   | 0.58  |
| hsa-mir-155  | ANAPC13  | -0.50 |
| hsa-mir-155  | ARL8A    | 0.40  |
| hsa-mir-155  | CCDC128  | -0.50 |
| hsa-mir-155  | CEP70    | -0.51 |
| hsa-mir-155  | CRYZL1   | -0.50 |
| hsa-mir-155  | MAT2B    | -0.52 |
| hsa-mir-155  | PTGFRN   | 0.61  |
| hsa-mir-155  | TCEAL1   | -0.50 |
| hsa-mir-155  | TRPC1    | -0.57 |
| hsa-mir-155  | USP46    | -0.59 |
| hsa-mir-155  | ZNF672   | 0.39  |
| hsa-mir-15a  | ADMR     | -0.55 |
| hsa-mir-15a  | CA3      | 0.50  |
| hsa-mir-15a  | CDC42EP4 | 0.61  |
| hsa-mir-15a  | EVI1     | 0.51  |
| hsa-mir-15a  | IQCG     | 0.55  |
| hsa-mir-15a  | OPN1LW   | -0.51 |
| hsa-mir-15a  | SAA2     | 0.40  |
| hsa-mir-15a  | SOX9     | 0.71  |
| hsa-mir-15a  | ZRANB1   | -0.59 |
| hsa-mir-15b  | C16orf74 | 0.34  |
| hsa-mir-15b  | C19orf48 | 0.57  |
| hsa-mir-15b  | CASP3    | 0.68  |
| hsa-mir-15b  | CNTN3    | -0.64 |

|               |           |       |
|---------------|-----------|-------|
| hsa-mir-15b   | DLGAP1    | -0.56 |
| hsa-mir-15b   | DNM3      | -0.62 |
| hsa-mir-15b   | DYNC1I1   | -0.65 |
| hsa-mir-15b   | GABARAPL3 | -0.75 |
| hsa-mir-15b   | GABRG1    | -0.73 |
| hsa-mir-15b   | GNAZ      | -0.70 |
| hsa-mir-15b   | HTR1E     | -0.66 |
| hsa-mir-15b   | KIF3A     | -0.65 |
| hsa-mir-15b   | LRRC7     | -0.74 |
| hsa-mir-15b   | MEPE      | -0.54 |
| hsa-mir-15b   | NEFM      | -0.67 |
| hsa-mir-15b   | NOS1AP    | -0.60 |
| hsa-mir-15b   | OCA2      | -0.63 |
| hsa-mir-15b   | OPTN      | -0.60 |
| hsa-mir-15b   | PLEKHH3   | 0.54  |
| hsa-mir-15b   | PPM1B     | -0.50 |
| hsa-mir-15b   | PTH2R     | -0.60 |
| hsa-mir-15b   | RHOC      | 0.65  |
| hsa-mir-15b   | RPRML     | -0.56 |
| hsa-mir-15b   | RRP9      | 0.42  |
| hsa-mir-15b   | STXBP5L   | -0.52 |
| hsa-mir-15b   | STYK1     | -0.61 |
| hsa-mir-15b   | ZNF365    | -0.64 |
| hsa-mir-15b   | ZNRD1     | 0.59  |
| hsa-mir-16    | ACOT7     | -0.64 |
| hsa-mir-16    | ATP6V1A   | -0.57 |
| hsa-mir-16    | BHMT      | -0.67 |
| hsa-mir-16    | C17orf74  | -0.57 |
| hsa-mir-16    | C1orf59   | -0.63 |
| hsa-mir-16    | CA3       | 0.59  |
| hsa-mir-16    | COX15     | -0.41 |
| hsa-mir-16    | DARS      | 0.51  |
| hsa-mir-16    | DTNB      | -0.59 |
| hsa-mir-16    | DYX1C1    | 0.57  |
| hsa-mir-16    | ECHS1     | -0.68 |
| hsa-mir-16    | EMP1      | 0.58  |
| hsa-mir-16    | IDI1      | -0.65 |
| hsa-mir-16    | LANCL1    | -0.59 |
| hsa-mir-16    | LOC136288 | 0.49  |
| hsa-mir-16    | MPP7      | -0.70 |
| hsa-mir-16    | NSUN7     | 0.56  |
| hsa-mir-16    | PPP3CB    | -0.60 |
| hsa-mir-16    | RAP1GDS1  | -0.62 |
| hsa-mir-16    | RGL2      | 0.62  |
| hsa-mir-16    | SMAD1     | 0.63  |
| hsa-mir-16    | SOX9      | 0.64  |
| hsa-mir-16    | UNK       | 0.61  |
| hsa-mir-16    | ZNF702    | -0.63 |
| hsa-mir-17-3p | CRYBB2    | 0.57  |
| hsa-mir-17-3p | KIAA1377  | -0.45 |
| hsa-mir-17-3p | LASS5     | 0.54  |
| hsa-mir-17-3p | LMO3      | -0.58 |
| hsa-mir-17-3p | LOC165186 | -0.58 |
| hsa-mir-17-3p | MGC29891  | -0.64 |
| hsa-mir-17-3p | PHYHD1    | -0.65 |
| hsa-mir-17-3p | ZNF193    | 0.62  |

|               |           |       |
|---------------|-----------|-------|
| hsa-mir-17-5p | ACCN1     | -0.59 |
| hsa-mir-17-5p | BIN1      | -0.65 |
| hsa-mir-17-5p | FOXD2     | -0.66 |
| hsa-mir-17-5p | KHDRBS2   | -0.54 |
| hsa-mir-17-5p | LAPTM4B   | 0.72  |
| hsa-mir-17-5p | LDOC1     | -0.66 |
| hsa-mir-17-5p | LRRC37B   | 0.68  |
| hsa-mir-17-5p | MGC4172   | -0.46 |
| hsa-mir-17-5p | MYCL1     | 0.62  |
| hsa-mir-17-5p | NCDN      | -0.62 |
| hsa-mir-17-5p | PNCK      | -0.54 |
| hsa-mir-17-5p | TGIF1     | 0.63  |
| hsa-mir-17-5p | ZNF193    | 0.73  |
| hsa-mir-17-5p | ZNF483    | -0.59 |
| hsa-mir-181a  | B4GALT4   | -0.57 |
| hsa-mir-181a  | FANK1     | -0.54 |
| hsa-mir-181a  | OSBPL11   | -0.54 |
| hsa-mir-181a  | THNSL2    | 0.43  |
| hsa-mir-181a* | 9-Mar     | 0.62  |
| hsa-mir-181b  | C6orf108  | -0.47 |
| hsa-mir-181b  | C9orf150  | 0.60  |
| hsa-mir-181b  | CHRM4     | 0.54  |
| hsa-mir-181b  | CNNM1     | 0.38  |
| hsa-mir-181b  | FABP1     | 0.60  |
| hsa-mir-181b  | FLJ10324  | -0.56 |
| hsa-mir-181b  | FOLH1     | 0.64  |
| hsa-mir-181b  | PPP1R14A  | 0.61  |
| hsa-mir-181b  | PSMAL     | 0.63  |
| hsa-mir-181b  | SOX13     | -0.53 |
| hsa-mir-181b  | TMEM165   | 0.47  |
| hsa-mir-181b  | ZNF488    | 0.61  |
| hsa-mir-181c  | C14orf132 | -0.37 |
| hsa-mir-181c  | NAP5      | -0.31 |
| hsa-mir-181c  | NR3C2     | -0.39 |
| hsa-mir-181d  | DIP       | -0.66 |
| hsa-mir-181d  | FLJ12993  | -0.59 |
| hsa-mir-182   | CD80      | 0.58  |
| hsa-mir-182   | MLL5      | -0.71 |
| hsa-mir-182   | OR2AG1    | 0.46  |
| hsa-mir-182   | PDZD8     | -0.61 |
| hsa-mir-182   | RPSA      | 0.60  |
| hsa-mir-182*  | ACN9      | 0.52  |
| hsa-mir-182*  | ANKRD26   | -0.55 |
| hsa-mir-182*  | ATP6V0A1  | -0.52 |
| hsa-mir-182*  | C11orf9   | -0.54 |
| hsa-mir-182*  | CASP6     | 0.53  |
| hsa-mir-182*  | CBX3      | 0.49  |
| hsa-mir-182*  | CD99L2    | -0.49 |
| hsa-mir-182*  | CDC2L6    | -0.50 |
| hsa-mir-182*  | CLCN4     | -0.54 |
| hsa-mir-182*  | CP110     | -0.74 |
| hsa-mir-182*  | DERA      | 0.55  |
| hsa-mir-182*  | DOCK1     | -0.65 |
| hsa-mir-182*  | DTYMK     | 0.57  |
| hsa-mir-182*  | FGFR2     | -0.55 |
| hsa-mir-182*  | GNG12     | 0.40  |

|              |          |       |
|--------------|----------|-------|
| hsa-mir-182* | HERC1    | -0.56 |
| hsa-mir-182* | HR       | -0.65 |
| hsa-mir-182* | IFRD1    | 0.51  |
| hsa-mir-182* | KIAA0427 | -0.47 |
| hsa-mir-182* | KIAA0513 | -0.55 |
| hsa-mir-182* | KIF5A    | -0.55 |
| hsa-mir-182* | PDPK1    | -0.53 |
| hsa-mir-182* | POT1     | 0.52  |
| hsa-mir-182* | PPP1R16B | -0.64 |
| hsa-mir-182* | SLC45A4  | -0.64 |
| hsa-mir-182* | SLITRK5  | -0.55 |
| hsa-mir-182* | SYNJ2    | -0.66 |
| hsa-mir-182* | TAX1BP3  | 0.59  |
| hsa-mir-182* | TMEM106C | 0.51  |
| hsa-mir-182* | TMEM46   | -0.48 |
| hsa-mir-182* | UBE2O    | -0.57 |
| hsa-mir-182* | USP31    | -0.69 |
| hsa-mir-183  | CD80     | 0.56  |
| hsa-mir-183  | MLL5     | -0.67 |
| hsa-mir-183  | RAB8B    | 0.52  |
| hsa-mir-183  | TMEM62   | 0.56  |
| hsa-mir-183  | TTC3     | -0.49 |
| hsa-mir-183  | ZNF135   | -0.58 |
| hsa-mir-185  | ADAM11   | 0.54  |
| hsa-mir-185  | ADCY5    | 0.58  |
| hsa-mir-185  | BCL2L2   | 0.59  |
| hsa-mir-185  | C10orf90 | 0.68  |
| hsa-mir-185  | CCDC111  | -0.66 |
| hsa-mir-185  | CCKBR    | 0.59  |
| hsa-mir-185  | CNTNAP4  | 0.70  |
| hsa-mir-185  | CRISPLD1 | -0.59 |
| hsa-mir-185  | DBNDD2   | 0.72  |
| hsa-mir-185  | DNAJC12  | 0.73  |
| hsa-mir-185  | DYSF     | 0.64  |
| hsa-mir-185  | EDG8     | 0.71  |
| hsa-mir-185  | ENO2     | 0.58  |
| hsa-mir-185  | ENPP2    | 0.70  |
| hsa-mir-185  | FAM124A  | 0.71  |
| hsa-mir-185  | FBXL16   | 0.54  |
| hsa-mir-185  | FLRT2    | 0.52  |
| hsa-mir-185  | GINS3    | -0.59 |
| hsa-mir-185  | GJB5     | 0.64  |
| hsa-mir-185  | GLT1D1   | 0.65  |
| hsa-mir-185  | GNG12    | -0.50 |
| hsa-mir-185  | GPATCH2  | -0.58 |
| hsa-mir-185  | GTPBP10  | -0.52 |
| hsa-mir-185  | KCNMB4   | 0.76  |
| hsa-mir-185  | KIAA1394 | 0.68  |
| hsa-mir-185  | KIAA1957 | 0.57  |
| hsa-mir-185  | LARP6    | 0.67  |
| hsa-mir-185  | LRFN5    | 0.54  |
| hsa-mir-185  | MESDC1   | 0.73  |
| hsa-mir-185  | NCOA7    | 0.75  |
| hsa-mir-185  | NPTX1    | 0.66  |
| hsa-mir-185  | ODC1     | -0.49 |
| hsa-mir-185  | PCSK6    | 0.69  |

|              |           |       |
|--------------|-----------|-------|
| hsa-mir-185  | PDE4A     | 0.64  |
| hsa-mir-185  | PELI3     | 0.61  |
| hsa-mir-185  | PEX5L     | 0.65  |
| hsa-mir-185  | PNCK      | 0.57  |
| hsa-mir-185  | PNMA3     | 0.54  |
| hsa-mir-185  | POPDC3    | 0.70  |
| hsa-mir-185  | PPM1H     | 0.73  |
| hsa-mir-185  | PPP3CA    | 0.54  |
| hsa-mir-185  | PRKCB1    | 0.69  |
| hsa-mir-185  | PTPRH     | 0.66  |
| hsa-mir-185  | RASAL1    | 0.66  |
| hsa-mir-185  | RAVER2    | -0.64 |
| hsa-mir-185  | RTN2      | 0.54  |
| hsa-mir-185  | SLC35F3   | 0.70  |
| hsa-mir-185  | SV2B      | 0.63  |
| hsa-mir-185  | TF        | 0.74  |
| hsa-mir-185  | TIA1      | -0.62 |
| hsa-mir-185  | TLL2      | 0.65  |
| hsa-mir-185  | TMEM67    | -0.55 |
| hsa-mir-185  | TSPAN12   | -0.59 |
| hsa-mir-185  | WNT2      | 0.59  |
| hsa-mir-186  | NPPB      | 0.27  |
| hsa-mir-186  | UBR1      | -0.45 |
| hsa-mir-188  | SELS      | -0.50 |
| hsa-mir-18a  | MGC4172   | -0.54 |
| hsa-mir-18a  | PHYHD1    | -0.71 |
| hsa-mir-18a  | SELS      | 0.53  |
| hsa-mir-191* | NPTX2     | -0.50 |
| hsa-mir-191* | SMOC1     | 0.56  |
| hsa-mir-192  | ANKRD50   | -0.56 |
| hsa-mir-193a | BLM       | 0.44  |
| hsa-mir-193a | CD160     | -0.55 |
| hsa-mir-193a | EVI2A     | -0.52 |
| hsa-mir-193a | PDE8A     | -0.51 |
| hsa-mir-193b | BHLHB4    | 0.39  |
| hsa-mir-193b | CDC42EP5  | 0.41  |
| hsa-mir-193b | CDH24     | 0.42  |
| hsa-mir-193b | DUSP15    | 0.40  |
| hsa-mir-193b | FBXL17    | 0.42  |
| hsa-mir-193b | FLJ43860  | 0.38  |
| hsa-mir-193b | GRIN2D    | 0.38  |
| hsa-mir-193b | KISS1R    | 0.49  |
| hsa-mir-193b | LOC63920  | -0.21 |
| hsa-mir-193b | NLRP6     | -0.48 |
| hsa-mir-193b | OPN4      | 0.40  |
| hsa-mir-193b | OR1F1     | -0.53 |
| hsa-mir-193b | OR5L1     | 0.45  |
| hsa-mir-193b | TINAG     | 0.38  |
| hsa-mir-195  | C7orf47   | 0.64  |
| hsa-mir-195  | CAMK1D    | -0.46 |
| hsa-mir-195  | FGFR2     | -0.48 |
| hsa-mir-195  | FOLH1     | -0.63 |
| hsa-mir-195  | HR        | -0.47 |
| hsa-mir-195  | LOC136242 | -0.59 |
| hsa-mir-195  | NCBP2     | 0.49  |
| hsa-mir-195  | PBX3      | 0.50  |

|               |           |       |
|---------------|-----------|-------|
| hsa-mir-195   | PLCL1     | -0.59 |
| hsa-mir-195   | RBP7      | -0.72 |
| hsa-mir-195   | SLC4A1AP  | -0.58 |
| hsa-mir-196a  | FOXD1     | 0.57  |
| hsa-mir-196a  | PBX3      | 0.49  |
| hsa-mir-196b  | ABT1      | 0.49  |
| hsa-mir-196b  | ARRB1     | -0.65 |
| hsa-mir-196b  | BCMO1     | 0.79  |
| hsa-mir-196b  | IFIT3     | -0.54 |
| hsa-mir-196b  | P2RX1     | 0.46  |
| hsa-mir-196b  | PTGES     | -0.64 |
| hsa-mir-197   | ADAM19    | 0.42  |
| hsa-mir-197   | BPY2C     | 0.70  |
| hsa-mir-197   | SARS2     | 0.45  |
| hsa-mir-198   | C18orf18  | -0.56 |
| hsa-mir-199a  | BTBD3     | -0.49 |
| hsa-mir-199a  | C7orf31   | 0.57  |
| hsa-mir-199a  | CAPN10    | 0.49  |
| hsa-mir-199a  | CCBL2     | -0.51 |
| hsa-mir-199a  | DAO       | 0.58  |
| hsa-mir-199a  | EIF3B     | 0.59  |
| hsa-mir-199a  | FBXL5     | -0.62 |
| hsa-mir-199a  | FLJ22795  | 0.58  |
| hsa-mir-199a  | HNF1A     | 0.51  |
| hsa-mir-199a  | HOXA4     | 0.62  |
| hsa-mir-199a  | HOXA7     | 0.60  |
| hsa-mir-199a  | HSPA6     | 0.63  |
| hsa-mir-199a  | MFNG      | 0.40  |
| hsa-mir-199a  | MRPS10    | -0.41 |
| hsa-mir-199a  | NOC3L     | -0.43 |
| hsa-mir-199a  | PPP3CB    | -0.45 |
| hsa-mir-199a  | PTCD1     | 0.67  |
| hsa-mir-199a  | RAB43     | 0.56  |
| hsa-mir-199a  | SLC22A5   | 0.61  |
| hsa-mir-199a  | SLC2A1    | 0.70  |
| hsa-mir-199a  | SLC7A1    | 0.59  |
| hsa-mir-199a  | ZBTB11    | -0.49 |
| hsa-mir-199a* | BTN3A1    | -0.62 |
| hsa-mir-199a* | C10orf97  | -0.44 |
| hsa-mir-199a* | DAO       | 0.53  |
| hsa-mir-199a* | DIRC2     | 0.60  |
| hsa-mir-199a* | EVI1      | 0.59  |
| hsa-mir-199a* | GYG2      | 0.60  |
| hsa-mir-199a* | HOXA7     | 0.47  |
| hsa-mir-199a* | HSPA6     | 0.62  |
| hsa-mir-199a* | ING2      | 0.60  |
| hsa-mir-199a* | IQCE      | 0.65  |
| hsa-mir-199a* | LNPEP     | -0.40 |
| hsa-mir-199a* | LOC255374 | 0.55  |
| hsa-mir-199a* | NCOA4     | -0.51 |
| hsa-mir-199a* | PTCD1     | 0.70  |
| hsa-mir-199a* | PTDSS2    | 0.44  |
| hsa-mir-199a* | RAB43     | 0.63  |
| hsa-mir-199a* | TATDN2    | 0.54  |
| hsa-mir-199a* | TMEM93    | 0.46  |
| hsa-mir-199a* | ZC3H7B    | 0.55  |



|               |           |       |
|---------------|-----------|-------|
| hsa-mir-199b  | CALR3     | 0.44  |
| hsa-mir-199b  | STMN1     | -0.35 |
| hsa-mir-19a   | C12orf52  | -0.48 |
| hsa-mir-19a   | C1orf31   | -0.50 |
| hsa-mir-19a   | CXorf52   | 0.61  |
| hsa-mir-19a   | ID4       | 0.50  |
| hsa-mir-19a   | LY6E      | -0.58 |
| hsa-mir-19a   | LYPD5     | -0.54 |
| hsa-mir-19a   | SDCCAG10  | 0.56  |
| hsa-mir-19a   | TIGD7     | 0.56  |
| hsa-mir-19a   | TRIM39    | 0.60  |
| hsa-mir-19b   | BCL6      | 0.59  |
| hsa-mir-19b   | C1orf41   | -0.53 |
| hsa-mir-19b   | CDH11     | 0.49  |
| hsa-mir-19b   | NR1I3     | -0.57 |
| hsa-mir-19b   | QTRTD1    | 0.53  |
| hsa-mir-19b   | STON1     | 0.51  |
| hsa-mir-19b   | TFG       | 0.56  |
| hsa-mir-19b   | TIGD7     | 0.50  |
| hsa-mir-200a* | CLIC2     | 0.63  |
| hsa-mir-202   | ZNF492    | 0.49  |
| hsa-mir-203   | KIAA1946  | 0.52  |
| hsa-mir-204   | C1QL1     | -0.61 |
| hsa-mir-204   | CYP2A13   | -0.42 |
| hsa-mir-204   | KCNQ2     | -0.42 |
| hsa-mir-204   | LOC198437 | -0.50 |
| hsa-mir-204   | LOC388610 | -0.44 |
| hsa-mir-204   | SPSB4     | -0.57 |
| hsa-mir-204   | TSEN2     | 0.61  |
| hsa-mir-205   | BCL2L14   | 0.76  |
| hsa-mir-206   | UBXD4     | 0.42  |
| hsa-mir-20a   | EFCBP2    | -0.57 |
| hsa-mir-20a   | FOXD2     | -0.63 |
| hsa-mir-20a   | PPP1R13B  | -0.50 |
| hsa-mir-20a   | SOX4      | 0.65  |
| hsa-mir-20a   | TIGD7     | 0.52  |
| hsa-mir-20a   | ZNF193    | 0.64  |
| hsa-mir-20b   | ACCN1     | -0.53 |
| hsa-mir-20b   | CCT2      | 0.53  |
| hsa-mir-20b   | KHDRBS2   | -0.46 |
| hsa-mir-20b   | MYCL1     | 0.53  |
| hsa-mir-20b   | NCDN      | -0.55 |
| hsa-mir-20b   | RIMS2     | -0.44 |
| hsa-mir-20b   | SCN2A     | -0.49 |
| hsa-mir-20b   | SLC4A7    | -0.48 |
| hsa-mir-20b   | SOX4      | 0.65  |
| hsa-mir-20b   | ZNF193    | 0.65  |
| hsa-mir-21    | ATP6V0A4  | -0.53 |
| hsa-mir-21    | CCDC77    | 0.54  |
| hsa-mir-21    | CNNM1     | -0.61 |
| hsa-mir-21    | CPO       | -0.51 |
| hsa-mir-21    | DUSP16    | 0.42  |
| hsa-mir-21    | GUK1      | -0.48 |
| hsa-mir-21    | IDI1      | -0.74 |
| hsa-mir-21    | MYBPHL    | -0.56 |
| hsa-mir-21    | OMD       | -0.58 |

|             |          |       |
|-------------|----------|-------|
| hsa-mir-21  | SNCG     | -0.57 |
| hsa-mir-21  | TOMM20   | -0.60 |
| hsa-mir-21  | VWCE     | 0.32  |
| hsa-mir-210 | APP      | 0.49  |
| hsa-mir-210 | BPY2C    | -0.51 |
| hsa-mir-210 | C1QL2    | -0.46 |
| hsa-mir-210 | C1orf95  | -0.48 |
| hsa-mir-210 | HDLBP    | 0.56  |
| hsa-mir-210 | HGF      | 0.47  |
| hsa-mir-210 | MMP21    | -0.65 |
| hsa-mir-210 | MYH4     | -0.46 |
| hsa-mir-210 | PTPN1    | 0.56  |
| hsa-mir-212 | TTR      | 0.64  |
| hsa-mir-214 | C2orf33  | 0.33  |
| hsa-mir-215 | EBF1     | 0.43  |
| hsa-mir-215 | MBIP     | 0.29  |
| hsa-mir-215 | MGST2    | -0.43 |
| hsa-mir-215 | PFDN5    | -0.42 |
| hsa-mir-216 | ULBP2    | 0.66  |
| hsa-mir-217 | CNTNAP5  | 0.72  |
| hsa-mir-217 | STK32B   | 0.66  |
| hsa-mir-217 | ULBP2    | 0.65  |
| hsa-mir-218 | ATP1B1   | 0.63  |
| hsa-mir-218 | BRSK2    | 0.70  |
| hsa-mir-218 | DAOA     | -0.68 |
| hsa-mir-218 | FABP6    | 0.64  |
| hsa-mir-218 | FAM123C  | 0.77  |
| hsa-mir-218 | GNG12    | -0.65 |
| hsa-mir-218 | HPCAL1   | 0.62  |
| hsa-mir-218 | JPH3     | 0.73  |
| hsa-mir-218 | MAGEE1   | 0.70  |
| hsa-mir-218 | MUC4     | -0.55 |
| hsa-mir-218 | NUP43    | -0.55 |
| hsa-mir-218 | NY-REN-7 | 0.77  |
| hsa-mir-218 | RGMB     | 0.48  |
| hsa-mir-218 | SCAMP5   | 0.68  |
| hsa-mir-218 | SORCS1   | 0.64  |
| hsa-mir-218 | SUSD5    | 0.63  |
| hsa-mir-218 | SYNGR3   | 0.61  |
| hsa-mir-218 | USP43    | 0.64  |
| hsa-mir-218 | WBSCR17  | 0.63  |
| hsa-mir-219 | ACSL1    | 0.63  |
| hsa-mir-219 | ALG6     | -0.56 |
| hsa-mir-219 | C1orf53  | -0.56 |
| hsa-mir-219 | DLG1     | 0.61  |
| hsa-mir-219 | IL11RA   | -0.47 |
| hsa-mir-219 | ING3     | -0.58 |
| hsa-mir-219 | INPP5A   | 0.59  |
| hsa-mir-219 | KIAA1799 | -0.50 |
| hsa-mir-219 | MTRR     | 0.62  |
| hsa-mir-219 | RESP18   | 0.50  |
| hsa-mir-219 | SH3KBP1  | 0.56  |
| hsa-mir-219 | SLC9A1   | 0.47  |
| hsa-mir-219 | TAS1R1   | -0.48 |
| hsa-mir-219 | TMOD4    | -0.54 |
| hsa-mir-219 | USP32    | 0.59  |

|             |           |       |
|-------------|-----------|-------|
| hsa-mir-219 | YPEL2     | 0.73  |
| hsa-mir-221 | CPA1      | -0.61 |
| hsa-mir-221 | EIF4ENIF1 | 0.51  |
| hsa-mir-221 | GALC      | 0.66  |
| hsa-mir-222 | ANLN      | 0.66  |
| hsa-mir-222 | ARPP-19   | 0.47  |
| hsa-mir-222 | C13orf16  | 0.64  |
| hsa-mir-222 | C6orf159  | 0.56  |
| hsa-mir-222 | CAMK1D    | 0.59  |
| hsa-mir-222 | CDCA7     | -0.55 |
| hsa-mir-222 | CDKL2     | 0.63  |
| hsa-mir-222 | CENPB     | -0.39 |
| hsa-mir-222 | CLCA4     | 0.58  |
| hsa-mir-222 | CRHBP     | 0.56  |
| hsa-mir-222 | CUTL2     | 0.47  |
| hsa-mir-222 | DAP       | -0.47 |
| hsa-mir-222 | DLG2      | 0.60  |
| hsa-mir-222 | DLGAP1    | 0.62  |
| hsa-mir-222 | DNM1L     | 0.64  |
| hsa-mir-222 | ENPP2     | 0.63  |
| hsa-mir-222 | FAM126B   | 0.55  |
| hsa-mir-222 | GALC      | 0.64  |
| hsa-mir-222 | GPR62     | 0.59  |
| hsa-mir-222 | HAPLN2    | 0.53  |
| hsa-mir-222 | IL1RAPL1  | 0.45  |
| hsa-mir-222 | IQWD1     | 0.57  |
| hsa-mir-222 | IRX3      | -0.64 |
| hsa-mir-222 | KCNIP4    | 0.59  |
| hsa-mir-222 | KRT222P   | 0.64  |
| hsa-mir-222 | LHPP      | 0.60  |
| hsa-mir-222 | NKX6-2    | 0.59  |
| hsa-mir-222 | PCSK2     | 0.46  |
| hsa-mir-222 | PGM2L1    | 0.60  |
| hsa-mir-222 | PIP4K2A   | 0.49  |
| hsa-mir-222 | PSD3      | 0.68  |
| hsa-mir-222 | RFPL2     | 0.61  |
| hsa-mir-222 | SLC5A11   | 0.57  |
| hsa-mir-222 | SNAP91    | 0.58  |
| hsa-mir-222 | SPTA1     | -0.24 |
| hsa-mir-222 | SRPRB     | -0.26 |
| hsa-mir-222 | SST       | 0.50  |
| hsa-mir-222 | TIAM2     | 0.72  |
| hsa-mir-222 | ZNF365    | 0.60  |
| hsa-mir-223 | BLZF1     | -0.40 |
| hsa-mir-223 | BTBD3     | -0.50 |
| hsa-mir-223 | C14orf129 | -0.58 |
| hsa-mir-223 | CRBN      | -0.51 |
| hsa-mir-223 | DGKD      | 0.44  |
| hsa-mir-223 | MAT2B     | -0.44 |
| hsa-mir-223 | MRPS30    | -0.67 |
| hsa-mir-223 | SLC26A4   | -0.53 |
| hsa-mir-223 | SLC35A5   | -0.40 |
| hsa-mir-223 | TFB1M     | -0.55 |
| hsa-mir-223 | U2AF1L4   | -0.45 |
| hsa-mir-224 | KIAA1797  | -0.57 |
| hsa-mir-224 | MYT1      | 0.64  |

|             |           |       |
|-------------|-----------|-------|
| hsa-mir-23a | ABI1      | -0.60 |
| hsa-mir-23a | C1QL3     | -0.67 |
| hsa-mir-23a | DKK3      | -0.55 |
| hsa-mir-23a | DLG1      | -0.61 |
| hsa-mir-23a | EPB41L3   | -0.63 |
| hsa-mir-23a | GABRA4    | -0.72 |
| hsa-mir-23a | GDF10     | -0.62 |
| hsa-mir-23a | GUCY1A3   | -0.69 |
| hsa-mir-23a | KLK7      | -0.66 |
| hsa-mir-23a | MAP7      | -0.73 |
| hsa-mir-23a | NDST2     | -0.56 |
| hsa-mir-23a | NPTN      | -0.57 |
| hsa-mir-23a | PDE1B     | -0.65 |
| hsa-mir-23a | PPEF1     | -0.69 |
| hsa-mir-23a | PPP1R1A   | -0.60 |
| hsa-mir-23a | RASL10A   | -0.65 |
| hsa-mir-23a | SGPP2     | -0.75 |
| hsa-mir-23a | TLL1      | -0.55 |
| hsa-mir-23b | CD48      | -0.55 |
| hsa-mir-23b | IFI30     | -0.45 |
| hsa-mir-23b | LAP3      | -0.59 |
| hsa-mir-24  | OR5C1     | 0.42  |
| hsa-mir-24  | SCYL3     | -0.46 |
| hsa-mir-24  | TIGD2     | -0.54 |
| hsa-mir-24  | UBE2D1    | -0.55 |
| hsa-mir-25  | ACMSD     | 0.44  |
| hsa-mir-25  | ACVR1C    | -0.61 |
| hsa-mir-25  | AMPH      | -0.62 |
| hsa-mir-25  | ANXA7     | -0.61 |
| hsa-mir-25  | ARHGDIG   | -0.65 |
| hsa-mir-25  | ATP6V0C   | -0.62 |
| hsa-mir-25  | ATP8A1    | -0.60 |
| hsa-mir-25  | BOK       | -0.66 |
| hsa-mir-25  | C8orf34   | 0.43  |
| hsa-mir-25  | CAPN3     | -0.67 |
| hsa-mir-25  | CBLN1     | -0.61 |
| hsa-mir-25  | CDH18     | -0.62 |
| hsa-mir-25  | CDKN2D    | -0.63 |
| hsa-mir-25  | CYB5R2    | -0.68 |
| hsa-mir-25  | D15Wsu75e | -0.55 |
| hsa-mir-25  | DACH2     | -0.69 |
| hsa-mir-25  | DDN       | -0.60 |
| hsa-mir-25  | DYNC1I1   | -0.68 |
| hsa-mir-25  | ELOVL7    | -0.71 |
| hsa-mir-25  | F2R       | 0.68  |
| hsa-mir-25  | FGFR2     | -0.66 |
| hsa-mir-25  | FZD7      | 0.46  |
| hsa-mir-25  | GJA12     | -0.68 |
| hsa-mir-25  | GUCY1A3   | -0.59 |
| hsa-mir-25  | HES1      | 0.67  |
| hsa-mir-25  | HMGCLL1   | -0.71 |
| hsa-mir-25  | HOOK1     | -0.52 |
| hsa-mir-25  | HOXB3     | 0.53  |
| hsa-mir-25  | HS3ST5    | -0.70 |
| hsa-mir-25  | IQCH      | 0.55  |
| hsa-mir-25  | KCNK1     | -0.72 |

|            |          |       |
|------------|----------|-------|
| hsa-mir-25 | KCNK12   | -0.63 |
| hsa-mir-25 | KCNN1    | -0.67 |
| hsa-mir-25 | KLHL2    | -0.75 |
| hsa-mir-25 | KLK7     | -0.68 |
| hsa-mir-25 | LANCL1   | -0.71 |
| hsa-mir-25 | LDB3     | -0.71 |
| hsa-mir-25 | MAL      | -0.69 |
| hsa-mir-25 | MAP1A    | -0.61 |
| hsa-mir-25 | NDST2    | -0.62 |
| hsa-mir-25 | NEFL     | -0.61 |
| hsa-mir-25 | NEUROD2  | -0.62 |
| hsa-mir-25 | NRIP3    | -0.64 |
| hsa-mir-25 | NT5DC1   | -0.69 |
| hsa-mir-25 | OPRK1    | -0.65 |
| hsa-mir-25 | PCLO     | -0.62 |
| hsa-mir-25 | PCSK5    | 0.46  |
| hsa-mir-25 | PDE1A    | -0.62 |
| hsa-mir-25 | PLAC9    | -0.49 |
| hsa-mir-25 | PLEKHA1  | -0.73 |
| hsa-mir-25 | PPP1R14A | -0.70 |
| hsa-mir-25 | PPP1R2P9 | 0.47  |
| hsa-mir-25 | PPP2R2C  | -0.66 |
| hsa-mir-25 | PRKCQ    | -0.63 |
| hsa-mir-25 | PSD      | -0.69 |
| hsa-mir-25 | QDPR     | -0.71 |
| hsa-mir-25 | RAB40B   | -0.71 |
| hsa-mir-25 | RAP1GDS1 | -0.75 |
| hsa-mir-25 | RASAL1   | -0.62 |
| hsa-mir-25 | RBM11    | -0.74 |
| hsa-mir-25 | RFPL1    | -0.65 |
| hsa-mir-25 | RIMS2    | -0.65 |
| hsa-mir-25 | RPRML    | -0.58 |
| hsa-mir-25 | RSPO2    | -0.70 |
| hsa-mir-25 | RYR2     | -0.67 |
| hsa-mir-25 | SELM     | -0.64 |
| hsa-mir-25 | SEMA3C   | -0.60 |
| hsa-mir-25 | SGK2     | -0.69 |
| hsa-mir-25 | SH3GL3   | -0.71 |
| hsa-mir-25 | SIRT2    | -0.66 |
| hsa-mir-25 | SLC1A6   | -0.56 |
| hsa-mir-25 | SNCG     | -0.66 |
| hsa-mir-25 | SOX9     | 0.72  |
| hsa-mir-25 | SPOCK1   | -0.63 |
| hsa-mir-25 | SSTR2    | -0.58 |
| hsa-mir-25 | STXBP6   | -0.63 |
| hsa-mir-25 | STYK1    | -0.63 |
| hsa-mir-25 | SYN2     | -0.65 |
| hsa-mir-25 | SYNGR1   | -0.69 |
| hsa-mir-25 | TLL2     | -0.69 |
| hsa-mir-25 | TMEM16D  | -0.67 |
| hsa-mir-25 | TNNT1    | -0.60 |
| hsa-mir-25 | TRIM59   | -0.60 |
| hsa-mir-25 | TUBA8    | -0.61 |
| hsa-mir-25 | UNC13C   | -0.70 |
| hsa-mir-25 | WEE1     | 0.66  |
| hsa-mir-25 | WIF1     | -0.62 |

|             |               |       |
|-------------|---------------|-------|
| hsa-mir-25  | ZIC1          | 0.54  |
| hsa-mir-25  | ZNF365        | -0.71 |
| hsa-mir-25  | ZNF702        | -0.62 |
| hsa-mir-26b | BSDC1         | 0.59  |
| hsa-mir-26b | C1orf125      | 0.46  |
| hsa-mir-26b | C21orf13      | 0.55  |
| hsa-mir-26b | C9orf43       | 0.72  |
| hsa-mir-26b | CTAGE4        | -0.57 |
| hsa-mir-27a | ATP6V1C1      | -0.52 |
| hsa-mir-27a | CHIC1         | -0.51 |
| hsa-mir-27a | CUL2          | -0.55 |
| hsa-mir-27a | DLG1          | -0.67 |
| hsa-mir-27a | ERBB3         | -0.56 |
| hsa-mir-27a | GABRA4        | -0.67 |
| hsa-mir-27a | GDF10         | -0.61 |
| hsa-mir-27a | GUCY1B3       | -0.68 |
| hsa-mir-27a | KCNS3         | -0.65 |
| hsa-mir-27a | KIAA1128      | -0.62 |
| hsa-mir-27a | KIAA1946      | -0.67 |
| hsa-mir-27a | NPTN          | -0.65 |
| hsa-mir-27a | PPEF1         | -0.69 |
| hsa-mir-27a | PRKCE         | -0.66 |
| hsa-mir-27a | PSD3          | -0.62 |
| hsa-mir-27a | SOX10         | -0.58 |
| hsa-mir-27a | TFCP2L1       | 0.48  |
| hsa-mir-27a | TLL1          | -0.47 |
| hsa-mir-27a | TRIM23        | -0.62 |
| hsa-mir-27a | TRIM37        | -0.64 |
| hsa-mir-28  | C19orf44      | 0.47  |
| hsa-mir-28  | SAP30BP       | 0.70  |
| hsa-mir-29a | ATP1B1        | 0.68  |
| hsa-mir-29a | ENC1          | 0.30  |
| hsa-mir-29a | FUT9          | 0.53  |
| hsa-mir-29a | NPTN          | 0.52  |
| hsa-mir-29a | NUDT10        | 0.50  |
| hsa-mir-29a | THUMPD1       | 0.53  |
| hsa-mir-29b | ATP1B1        | 0.66  |
| hsa-mir-29b | C20orf132     | 0.64  |
| hsa-mir-29b | CASP3         | -0.68 |
| hsa-mir-29b | CCDC109B      | -0.60 |
| hsa-mir-29b | CHCHD4        | 0.60  |
| hsa-mir-29b | DNM3          | 0.68  |
| hsa-mir-29b | GPX7          | -0.69 |
| hsa-mir-29b | MTBP          | -0.63 |
| hsa-mir-29b | USP43         | 0.56  |
| hsa-mir-29c | DKFZp762E1312 | -0.72 |
| hsa-mir-29c | DNM3          | 0.59  |
| hsa-mir-29c | FAM46A        | -0.52 |
| hsa-mir-29c | GSTO2         | 0.64  |
| hsa-mir-29c | IGFBP7        | -0.53 |
| hsa-mir-29c | MTRR          | 0.55  |
| hsa-mir-29c | NMB           | -0.60 |
| hsa-mir-29c | OCA2          | 0.54  |
| hsa-mir-29c | SIX6          | -0.49 |
| hsa-mir-301 | ATM           | -0.51 |
| hsa-mir-301 | C19orf50      | 0.52  |

|                |          |       |
|----------------|----------|-------|
| hsa-mir-301    | C19orf52 | 0.42  |
| hsa-mir-301    | CLPP     | 0.49  |
| hsa-mir-301    | ZDHHC21  | -0.56 |
| hsa-mir-301    | ZNF141   | -0.41 |
| hsa-mir-301    | ZNF429   | -0.43 |
| hsa-mir-301    | ZNF479   | -0.37 |
| hsa-mir-301    | ZNF486   | -0.46 |
| hsa-mir-302b   | BCAT1    | 0.42  |
| hsa-mir-302b   | CDC42EP3 | 0.46  |
| hsa-mir-302b   | CENTD3   | 0.54  |
| hsa-mir-302b   | IGFBP2   | 0.35  |
| hsa-mir-302b   | LPL      | 0.45  |
| hsa-mir-30a-3p | ARS2     | 0.61  |
| hsa-mir-30a-3p | CHD1L    | 0.52  |
| hsa-mir-30a-3p | PTP4A3   | 0.46  |
| hsa-mir-30a-3p | TOP1MT   | 0.55  |
| hsa-mir-30a-3p | XPNPEP1  | 0.48  |
| hsa-mir-30a-5p | ABHD12B  | -0.61 |
| hsa-mir-30a-5p | CACNB2   | -0.56 |
| hsa-mir-30a-5p | CPNE4    | -0.50 |
| hsa-mir-30a-5p | DLG2     | -0.58 |
| hsa-mir-30a-5p | MAL      | -0.56 |
| hsa-mir-30a-5p | NPY5R    | -0.48 |
| hsa-mir-30a-5p | NUP93    | 0.55  |
| hsa-mir-30a-5p | PSMAL    | -0.58 |
| hsa-mir-30a-5p | SH3GL3   | -0.56 |
| hsa-mir-30a-5p | SLC39A12 | -0.59 |
| hsa-mir-30a-5p | TOP1MT   | 0.54  |
| hsa-mir-30b    | BATF2    | -0.50 |
| hsa-mir-30b    | C17orf73 | -0.39 |
| hsa-mir-30c    | ATP8A1   | -0.47 |
| hsa-mir-30c    | CD84     | -0.44 |
| hsa-mir-30c    | CLCA4    | -0.51 |
| hsa-mir-30c    | FAM134B  | -0.57 |
| hsa-mir-30c    | FOLH1    | -0.60 |
| hsa-mir-30c    | GRM3     | -0.51 |
| hsa-mir-30c    | KIAA1189 | -0.59 |
| hsa-mir-30c    | KLHL32   | -0.42 |
| hsa-mir-30c    | MAP7     | -0.54 |
| hsa-mir-30c    | MNDA     | -0.54 |
| hsa-mir-30c    | MRPL24   | 0.57  |
| hsa-mir-30c    | NKX6-2   | -0.54 |
| hsa-mir-30c    | PSMAL    | -0.62 |
| hsa-mir-30c    | RAPGEF4  | -0.51 |
| hsa-mir-30c    | SPOCK3   | -0.51 |
| hsa-mir-30c    | TF       | -0.57 |
| hsa-mir-30c    | THAP7    | 0.43  |
| hsa-mir-30c    | UGT8     | -0.56 |
| hsa-mir-30d    | ATG4A    | 0.60  |
| hsa-mir-30d    | KCNC4    | 0.59  |
| hsa-mir-30d    | PGF      | 0.49  |
| hsa-mir-30d    | PITX3    | 0.50  |
| hsa-mir-30d    | SECISBP2 | -0.51 |
| hsa-mir-30e-3p | EYA3     | 0.54  |
| hsa-mir-30e-3p | TMEFF2   | -0.48 |
| hsa-mir-30e-3p | UGT8     | -0.58 |

|                |             |       |
|----------------|-------------|-------|
| hsa-mir-31     | EIF3EIP     | 0.56  |
| hsa-mir-31     | PPP2R5A     | -0.47 |
| hsa-mir-31     | PROM1       | 0.63  |
| hsa-mir-31     | RIN2        | -0.60 |
| hsa-mir-31     | TWISTNB     | 0.57  |
| hsa-mir-31     | ZC3H7B      | 0.41  |
| hsa-mir-323    | CDH7        | 0.77  |
| hsa-mir-323    | CHN2        | 0.56  |
| hsa-mir-323    | CNTN3       | 0.62  |
| hsa-mir-323    | CRYM        | 0.69  |
| hsa-mir-323    | IGSF8       | 0.65  |
| hsa-mir-323    | KCNS1       | 0.75  |
| hsa-mir-323    | LOC400451   | 0.67  |
| hsa-mir-323    | MAP7D2      | 0.77  |
| hsa-mir-323    | NAPB        | 0.77  |
| hsa-mir-323    | NEGR1       | 0.71  |
| hsa-mir-323    | OLFM3       | 0.72  |
| hsa-mir-323    | SLC35F2     | -0.60 |
| hsa-mir-323    | SUMF2       | -0.55 |
| hsa-mir-324-5p | ABCA1       | -0.60 |
| hsa-mir-324-5p | BCAR1       | 0.56  |
| hsa-mir-324-5p | FOXQ1       | 0.47  |
| hsa-mir-324-5p | FRS3        | 0.65  |
| hsa-mir-324-5p | GLA         | -0.74 |
| hsa-mir-324-5p | MADCAM1     | 0.53  |
| hsa-mir-324-5p | MESP1       | 0.52  |
| hsa-mir-324-5p | PBXIP1      | -0.63 |
| hsa-mir-324-5p | RP4-747L4.3 | -0.41 |
| hsa-mir-324-5p | SCRT1       | 0.51  |
| hsa-mir-324-5p | TMEM121     | 0.56  |
| hsa-mir-324-5p | WDR65       | -0.56 |
| hsa-mir-328    | ARL13B      | -0.48 |
| hsa-mir-328    | ARRDC3      | -0.50 |
| hsa-mir-328    | SLC16A6     | -0.61 |
| hsa-mir-328    | ZNF548      | -0.48 |
| hsa-mir-329    | AP3B2       | 0.68  |
| hsa-mir-329    | APLP1       | 0.47  |
| hsa-mir-329    | C12orf53    | 0.54  |
| hsa-mir-329    | C21orf77    | 0.49  |
| hsa-mir-329    | CACNG2      | 0.75  |
| hsa-mir-329    | DNM3        | 0.57  |
| hsa-mir-329    | ENO2        | 0.68  |
| hsa-mir-329    | FXYD7       | 0.62  |
| hsa-mir-329    | GDI1        | 0.57  |
| hsa-mir-329    | GIT1        | 0.66  |
| hsa-mir-329    | GPRIN1      | 0.62  |
| hsa-mir-329    | INSM2       | 0.75  |
| hsa-mir-329    | MAGI3       | 0.64  |
| hsa-mir-329    | NRSN1       | 0.58  |
| hsa-mir-329    | RNF157      | 0.67  |
| hsa-mir-329    | TLN2        | 0.56  |
| hsa-mir-329    | VAMP2       | 0.74  |
| hsa-mir-33     | CD47        | 0.38  |
| hsa-mir-33     | KISS1R      | -0.43 |
| hsa-mir-33     | KRTAP5-1    | -0.37 |
| hsa-mir-33     | NPM2        | 0.52  |



|             |           |       |
|-------------|-----------|-------|
| hsa-mir-33  | SLC8A2    | 0.56  |
| hsa-mir-330 | APPL1     | 0.42  |
| hsa-mir-330 | ARHGDIG   | 0.69  |
| hsa-mir-330 | ATP6V0C   | 0.70  |
| hsa-mir-330 | C19orf44  | -0.62 |
| hsa-mir-330 | CBLN2     | 0.70  |
| hsa-mir-330 | CCDC52    | -0.62 |
| hsa-mir-330 | CHN2      | 0.72  |
| hsa-mir-330 | CHST9     | -0.63 |
| hsa-mir-330 | CNTNAP2   | 0.73  |
| hsa-mir-330 | CXCR7     | -0.63 |
| hsa-mir-330 | CYB5R2    | 0.66  |
| hsa-mir-330 | DOK6      | 0.65  |
| hsa-mir-330 | ECM2      | -0.55 |
| hsa-mir-330 | EDG2      | 0.60  |
| hsa-mir-330 | EFHA2     | 0.67  |
| hsa-mir-330 | ELOVL7    | 0.71  |
| hsa-mir-330 | EMP1      | -0.66 |
| hsa-mir-330 | EN1       | -0.57 |
| hsa-mir-330 | FLJ22167  | -0.69 |
| hsa-mir-330 | GABRA2    | 0.67  |
| hsa-mir-330 | GDPD2     | -0.45 |
| hsa-mir-330 | GNAI1     | 0.72  |
| hsa-mir-330 | GSTO1     | 0.58  |
| hsa-mir-330 | HES1      | -0.65 |
| hsa-mir-330 | HOOK1     | 0.68  |
| hsa-mir-330 | HS3ST5    | 0.77  |
| hsa-mir-330 | IGSF8     | 0.80  |
| hsa-mir-330 | INPP5F    | 0.71  |
| hsa-mir-330 | IQCD      | -0.54 |
| hsa-mir-330 | KCNK1     | 0.70  |
| hsa-mir-330 | KLHL2     | 0.73  |
| hsa-mir-330 | LANCL1    | 0.82  |
| hsa-mir-330 | LFNG      | -0.58 |
| hsa-mir-330 | LOC554175 | 0.68  |
| hsa-mir-330 | MLF1      | -0.54 |
| hsa-mir-330 | MTMR7     | 0.72  |
| hsa-mir-330 | NCOA7     | 0.70  |
| hsa-mir-330 | NEFM      | 0.65  |
| hsa-mir-330 | NPC1      | 0.66  |
| hsa-mir-330 | NRGN      | 0.62  |
| hsa-mir-330 | NSUN7     | -0.62 |
| hsa-mir-330 | NY-REN-7  | 0.71  |
| hsa-mir-330 | OXCT2     | 0.67  |
| hsa-mir-330 | PDE1A     | 0.67  |
| hsa-mir-330 | PDE1B     | 0.72  |
| hsa-mir-330 | PEX5L     | 0.82  |
| hsa-mir-330 | PLEKHA1   | 0.81  |
| hsa-mir-330 | PNCK      | 0.77  |
| hsa-mir-330 | POFUT2    | -0.57 |
| hsa-mir-330 | POPDC3    | 0.73  |
| hsa-mir-330 | PPA1      | 0.67  |
| hsa-mir-330 | PPP1R16B  | 0.79  |
| hsa-mir-330 | PRKCQ     | 0.79  |
| hsa-mir-330 | PWWP2     | 0.71  |
| hsa-mir-330 | RAB11FIP2 | 0.64  |

|             |          |       |
|-------------|----------|-------|
| hsa-mir-330 | RAB26    | 0.68  |
| hsa-mir-330 | RAB40B   | 0.82  |
| hsa-mir-330 | RASAL1   | 0.76  |
| hsa-mir-330 | RASGRF2  | 0.79  |
| hsa-mir-330 | ROPN1L   | -0.42 |
| hsa-mir-330 | RPRML    | 0.63  |
| hsa-mir-330 | RUFY2    | 0.69  |
| hsa-mir-330 | RYR2     | 0.73  |
| hsa-mir-330 | SEMA3C   | 0.65  |
| hsa-mir-330 | SGK2     | 0.81  |
| hsa-mir-330 | SLAIN1   | 0.63  |
| hsa-mir-330 | SLC17A6  | 0.61  |
| hsa-mir-330 | SLC47A2  | -0.58 |
| hsa-mir-330 | SLC6A15  | 0.78  |
| hsa-mir-330 | SMO      | -0.73 |
| hsa-mir-330 | SNCAIP   | -0.64 |
| hsa-mir-330 | SPATA17  | -0.63 |
| hsa-mir-330 | STXBP1   | 0.70  |
| hsa-mir-330 | STXBP6   | 0.77  |
| hsa-mir-330 | SYT1     | 0.55  |
| hsa-mir-330 | TMEFF2   | 0.68  |
| hsa-mir-330 | TMEM16D  | 0.72  |
| hsa-mir-330 | TNNT1    | 0.75  |
| hsa-mir-330 | UNC13C   | 0.71  |
| hsa-mir-330 | YPEL2    | 0.74  |
| hsa-mir-330 | ZNF365   | 0.69  |
| hsa-mir-330 | ZRANB1   | 0.70  |
| hsa-mir-331 | ANXA1    | -0.58 |
| hsa-mir-331 | GJB6     | 0.49  |
| hsa-mir-331 | ITM2A    | 0.72  |
| hsa-mir-331 | IZUMO1   | 0.50  |
| hsa-mir-331 | KIT      | 0.53  |
| hsa-mir-331 | PLEKHA9  | -0.56 |
| hsa-mir-331 | RAB33A   | 0.60  |
| hsa-mir-331 | SLC28A2  | -0.56 |
| hsa-mir-331 | TRIM52   | -0.47 |
| hsa-mir-335 | EDG2     | -0.53 |
| hsa-mir-335 | OR52J3   | 0.53  |
| hsa-mir-338 | 5-Sep    | 0.56  |
| hsa-mir-338 | ACSL1    | 0.70  |
| hsa-mir-338 | ADAMTS4  | 0.73  |
| hsa-mir-338 | ALG6     | -0.52 |
| hsa-mir-338 | C18orf1  | 0.68  |
| hsa-mir-338 | C1orf106 | -0.52 |
| hsa-mir-338 | CABLES1  | 0.55  |
| hsa-mir-338 | CDO1     | -0.50 |
| hsa-mir-338 | CHN2     | 0.72  |
| hsa-mir-338 | CPSF3    | -0.54 |
| hsa-mir-338 | CXCL12   | 0.55  |
| hsa-mir-338 | DLG1     | 0.69  |
| hsa-mir-338 | DOCK7    | -0.55 |
| hsa-mir-338 | ELL2     | 0.61  |
| hsa-mir-338 | FGFR1OP2 | 0.51  |
| hsa-mir-338 | FLJ22167 | -0.63 |
| hsa-mir-338 | FLJ43987 | -0.48 |
| hsa-mir-338 | FLRT2    | 0.52  |

|             |           |       |
|-------------|-----------|-------|
| hsa-mir-338 | FRMD5     | 0.60  |
| hsa-mir-338 | GALNT3    | -0.48 |
| hsa-mir-338 | GLS       | 0.60  |
| hsa-mir-338 | GNG8      | 0.65  |
| hsa-mir-338 | IKZF5     | 0.45  |
| hsa-mir-338 | KALRN     | 0.62  |
| hsa-mir-338 | KCNJ2     | 0.58  |
| hsa-mir-338 | LANCL1    | 0.76  |
| hsa-mir-338 | LINCR     | -0.51 |
| hsa-mir-338 | LMO7      | 0.58  |
| hsa-mir-338 | LOC150763 | 0.59  |
| hsa-mir-338 | MKL2      | 0.59  |
| hsa-mir-338 | MTMR2     | 0.69  |
| hsa-mir-338 | NCOA7     | 0.68  |
| hsa-mir-338 | PDE1A     | 0.65  |
| hsa-mir-338 | PDE1C     | 0.65  |
| hsa-mir-338 | PIP3-E    | 0.69  |
| hsa-mir-338 | PLEKHA1   | 0.66  |
| hsa-mir-338 | PPARGC1B  | 0.63  |
| hsa-mir-338 | PPP1R12A  | 0.44  |
| hsa-mir-338 | PSD3      | 0.64  |
| hsa-mir-338 | RGS7BP    | 0.60  |
| hsa-mir-338 | RICS      | 0.59  |
| hsa-mir-338 | RTN4      | 0.62  |
| hsa-mir-338 | SCN3B     | 0.54  |
| hsa-mir-338 | SH3BP5    | 0.67  |
| hsa-mir-338 | SLC4A10   | 0.57  |
| hsa-mir-338 | SLC4A7    | 0.40  |
| hsa-mir-338 | SMO       | -0.59 |
| hsa-mir-338 | STXBP6    | 0.76  |
| hsa-mir-338 | SYTL2     | 0.64  |
| hsa-mir-338 | TAS2R14   | 0.47  |
| hsa-mir-338 | THRB      | 0.64  |
| hsa-mir-338 | TMOD4     | -0.50 |
| hsa-mir-338 | TSPAN15   | 0.58  |
| hsa-mir-338 | UBE2Z     | 0.52  |
| hsa-mir-338 | UNC13C    | 0.58  |
| hsa-mir-338 | USP32     | 0.62  |
| hsa-mir-338 | WDR78     | -0.48 |
| hsa-mir-338 | YPEL2     | 0.79  |
| hsa-mir-338 | YWHAH     | 0.61  |
| hsa-mir-338 | ZNF365    | 0.75  |
| hsa-mir-339 | AKAP5     | -0.59 |
| hsa-mir-339 | CHUK      | -0.38 |
| hsa-mir-339 | DNALI1    | 0.67  |
| hsa-mir-339 | EIF4A2    | -0.56 |
| hsa-mir-339 | ELSPBP1   | 0.53  |
| hsa-mir-339 | MARVELD3  | 0.55  |
| hsa-mir-339 | SEC23A    | -0.49 |
| hsa-mir-339 | YWHAH     | -0.62 |
| hsa-mir-342 | C1orf71   | 0.76  |
| hsa-mir-342 | CPS1      | 0.36  |
| hsa-mir-342 | GATA3     | 0.33  |
| hsa-mir-342 | LFNG      | -0.65 |
| hsa-mir-342 | RNASEH1   | 0.53  |
| hsa-mir-342 | TMEM30A   | 0.64  |

|             |              |       |
|-------------|--------------|-------|
| hsa-mir-34a | BIRC4        | 0.56  |
| hsa-mir-34a | BMP7         | 0.58  |
| hsa-mir-34a | C10orf47     | -0.54 |
| hsa-mir-34a | C11orf57     | 0.46  |
| hsa-mir-34a | CCDC125      | 0.51  |
| hsa-mir-34a | CD163        | 0.62  |
| hsa-mir-34a | CDC42SE2     | -0.52 |
| hsa-mir-34a | CDK5         | -0.60 |
| hsa-mir-34a | CHUK         | -0.60 |
| hsa-mir-34a | FLJ22655     | -0.63 |
| hsa-mir-34a | GOLIM4       | 0.55  |
| hsa-mir-34a | JARID1A      | 0.53  |
| hsa-mir-34a | KRT5         | -0.60 |
| hsa-mir-34a | MAP3K4       | -0.57 |
| hsa-mir-34a | ORM1         | -0.52 |
| hsa-mir-34a | PCDHGC4      | 0.56  |
| hsa-mir-34a | PRPSAP2      | -0.70 |
| hsa-mir-34a | PSMB3        | -0.60 |
| hsa-mir-34a | RPL10A       | -0.61 |
| hsa-mir-34a | RPL15        | -0.54 |
| hsa-mir-34a | RPN2         | 0.58  |
| hsa-mir-34a | S100A14      | -0.45 |
| hsa-mir-34a | SLBP         | -0.63 |
| hsa-mir-34a | TRAT1        | -0.49 |
| hsa-mir-34a | VTA1         | -0.62 |
| hsa-mir-34a | WASF4        | 0.48  |
| hsa-mir-34a | ZNF234       | 0.44  |
| hsa-mir-34b | CRYZL1       | -0.45 |
| hsa-mir-34b | KIAA0746     | 0.55  |
| hsa-mir-34b | RPN2         | 0.53  |
| hsa-mir-34c | C4orf38      | 0.61  |
| hsa-mir-34c | HHAT         | 0.70  |
| hsa-mir-34c | HPR          | 0.49  |
| hsa-mir-34c | RASL10A      | -0.61 |
| hsa-mir-34c | WRB          | 0.73  |
| hsa-mir-361 | TRAF6        | -0.51 |
| hsa-mir-362 | DKFZP566E164 | -0.47 |
| hsa-mir-362 | LOC401052    | 0.55  |
| hsa-mir-362 | TMEM79       | 0.56  |
| hsa-mir-362 | ZNF292       | -0.61 |
| hsa-mir-363 | APPL1        | -0.64 |
| hsa-mir-363 | POPDC2       | 0.50  |
| hsa-mir-363 | PTPN5        | -0.35 |
| hsa-mir-363 | TRIM58       | -0.36 |
| hsa-mir-363 | TTC13        | 0.48  |
| hsa-mir-365 | HIST1H4E     | 0.58  |
| hsa-mir-365 | PKHD1L1      | -0.48 |
| hsa-mir-370 | ALG6         | 0.51  |
| hsa-mir-370 | FLNA         | 0.43  |
| hsa-mir-370 | MRPL43       | -0.53 |
| hsa-mir-370 | SLC26A2      | 0.46  |
| hsa-mir-371 | COQ5         | -0.53 |
| hsa-mir-371 | EML4         | 0.39  |
| hsa-mir-371 | LRP3         | 0.60  |
| hsa-mir-371 | MAST2        | 0.58  |
| hsa-mir-371 | SF3B3        | 0.51  |

|              |           |       |
|--------------|-----------|-------|
| hsa-mir-371  | SNAP29    | -0.48 |
| hsa-mir-373* | EHD2      | 0.58  |
| hsa-mir-374  | EGR1      | 0.45  |
| hsa-mir-376a | CYLD      | 0.39  |
| hsa-mir-376a | OGDHL     | 0.44  |
| hsa-mir-376b | C10orf92  | -0.61 |
| hsa-mir-377  | ACTL6A    | -0.54 |
| hsa-mir-377  | ATP4B     | -0.65 |
| hsa-mir-377  | ATP6V1E1  | 0.51  |
| hsa-mir-377  | BHMT2     | 0.58  |
| hsa-mir-377  | C2orf28   | -0.56 |
| hsa-mir-377  | C5orf40   | 0.47  |
| hsa-mir-377  | CRHBP     | 0.56  |
| hsa-mir-377  | ELOVL7    | 0.62  |
| hsa-mir-377  | EXOC3     | 0.52  |
| hsa-mir-377  | EXOC8     | 0.46  |
| hsa-mir-377  | GPR143    | 0.58  |
| hsa-mir-377  | INTS10    | -0.64 |
| hsa-mir-377  | KCNAB2    | 0.63  |
| hsa-mir-377  | KCNJ4     | 0.65  |
| hsa-mir-377  | KCNV1     | 0.56  |
| hsa-mir-377  | NBL1      | 0.64  |
| hsa-mir-377  | NPAS1     | 0.69  |
| hsa-mir-377  | PELI3     | 0.56  |
| hsa-mir-377  | PRKCQ     | 0.64  |
| hsa-mir-377  | RBPMS2    | 0.39  |
| hsa-mir-377  | SERPINI1  | 0.63  |
| hsa-mir-377  | SIRPA     | 0.57  |
| hsa-mir-377  | SOX11     | -0.46 |
| hsa-mir-377  | SUSD5     | 0.60  |
| hsa-mir-377  | SYCE1     | 0.56  |
| hsa-mir-377  | TMEM10    | 0.53  |
| hsa-mir-378  | ISCA1     | -0.51 |
| hsa-mir-379  | ACTL6A    | -0.65 |
| hsa-mir-379  | AP3B2     | 0.47  |
| hsa-mir-379  | ASPHD2    | 0.60  |
| hsa-mir-379  | BHMT2     | 0.57  |
| hsa-mir-379  | BRSK1     | 0.68  |
| hsa-mir-379  | CAMK2A    | 0.62  |
| hsa-mir-379  | CNTFR     | 0.37  |
| hsa-mir-379  | DACT3     | 0.61  |
| hsa-mir-379  | GRIN3A    | 0.50  |
| hsa-mir-379  | HAPLN4    | 0.60  |
| hsa-mir-379  | KALRN     | 0.54  |
| hsa-mir-379  | KIF5A     | 0.51  |
| hsa-mir-379  | PSD       | 0.60  |
| hsa-mir-379  | ProSAPiP1 | 0.57  |
| hsa-mir-379  | RAP1GAP   | 0.69  |
| hsa-mir-379  | RGS4      | 0.60  |
| hsa-mir-379  | SHANK1    | 0.53  |
| hsa-mir-379  | SHC3      | 0.62  |
| hsa-mir-379  | SLC7A10   | 0.53  |
| hsa-mir-379  | SOX4      | -0.46 |
| hsa-mir-381  | ABHD12B   | 0.68  |
| hsa-mir-381  | ANKRD34   | 0.75  |
| hsa-mir-381  | ANKRD43   | 0.72  |

|             |           |       |
|-------------|-----------|-------|
| hsa-mir-381 | ARHGDIG   | 0.82  |
| hsa-mir-381 | ATP6V1H   | 0.77  |
| hsa-mir-381 | ATRNL1    | 0.61  |
| hsa-mir-381 | C19orf44  | -0.63 |
| hsa-mir-381 | C1QL3     | 0.83  |
| hsa-mir-381 | C1orf216  | 0.83  |
| hsa-mir-381 | C1orf59   | 0.69  |
| hsa-mir-381 | CAMK2A    | 0.68  |
| hsa-mir-381 | CAMKK2    | 0.76  |
| hsa-mir-381 | CAMKV     | 0.65  |
| hsa-mir-381 | CBLN2     | 0.76  |
| hsa-mir-381 | CDH7      | 0.79  |
| hsa-mir-381 | CPNE6     | 0.56  |
| hsa-mir-381 | CRYM      | 0.76  |
| hsa-mir-381 | DOK6      | 0.78  |
| hsa-mir-381 | DPYSL3    | -0.64 |
| hsa-mir-381 | EFCBP1    | 0.66  |
| hsa-mir-381 | EFHA2     | 0.81  |
| hsa-mir-381 | EMP1      | -0.64 |
| hsa-mir-381 | ENC1      | 0.75  |
| hsa-mir-381 | EPS15     | 0.58  |
| hsa-mir-381 | EXTL1     | 0.72  |
| hsa-mir-381 | FAM19A1   | 0.60  |
| hsa-mir-381 | FAM19A4   | 0.70  |
| hsa-mir-381 | FCHO1     | 0.64  |
| hsa-mir-381 | GABRA1    | 0.69  |
| hsa-mir-381 | GLS       | 0.80  |
| hsa-mir-381 | GLS2      | 0.80  |
| hsa-mir-381 | HPCA      | 0.75  |
| hsa-mir-381 | HPRT1     | 0.84  |
| hsa-mir-381 | HTR2C     | 0.85  |
| hsa-mir-381 | INPP5F    | 0.83  |
| hsa-mir-381 | KCNK1     | 0.79  |
| hsa-mir-381 | KIAA0143  | 0.66  |
| hsa-mir-381 | KIAA0888  | 0.50  |
| hsa-mir-381 | KIAA1239  | 0.76  |
| hsa-mir-381 | KRT222P   | 0.81  |
| hsa-mir-381 | LANCL1    | 0.67  |
| hsa-mir-381 | LOC400120 | 0.77  |
| hsa-mir-381 | MDH1      | 0.70  |
| hsa-mir-381 | MEF2C     | 0.64  |
| hsa-mir-381 | MMD       | 0.75  |
| hsa-mir-381 | NAPB      | 0.82  |
| hsa-mir-381 | NGB       | 0.63  |
| hsa-mir-381 | OR2L13    | 0.66  |
| hsa-mir-381 | PDE1A     | 0.70  |
| hsa-mir-381 | PNCK      | 0.81  |
| hsa-mir-381 | POPDC3    | 0.72  |
| hsa-mir-381 | PPA1      | 0.67  |
| hsa-mir-381 | PPP1R13B  | 0.60  |
| hsa-mir-381 | PPP3CB    | 0.75  |
| hsa-mir-381 | PREPL     | 0.69  |
| hsa-mir-381 | PRKACB    | 0.48  |
| hsa-mir-381 | PRRT1     | 0.69  |
| hsa-mir-381 | PTER      | 0.69  |
| hsa-mir-381 | RAB26     | 0.69  |

|                |           |       |
|----------------|-----------|-------|
| hsa-mir-381    | RASAL1    | 0.75  |
| hsa-mir-381    | RASGRF2   | 0.76  |
| hsa-mir-381    | RBM11     | 0.84  |
| hsa-mir-381    | REPS2     | 0.66  |
| hsa-mir-381    | RFPL2     | 0.77  |
| hsa-mir-381    | RICH2     | 0.77  |
| hsa-mir-381    | RUFY2     | 0.62  |
| hsa-mir-381    | SERPINI1  | 0.84  |
| hsa-mir-381    | SNCG      | 0.82  |
| hsa-mir-381    | SSX2IP    | 0.71  |
| hsa-mir-381    | STAT4     | 0.80  |
| hsa-mir-381    | STK33     | -0.73 |
| hsa-mir-381    | STK36     | -0.71 |
| hsa-mir-381    | STXBP1    | 0.73  |
| hsa-mir-381    | STXBP6    | 0.76  |
| hsa-mir-381    | STYK1     | 0.85  |
| hsa-mir-381    | SYCE1     | 0.80  |
| hsa-mir-381    | SYNGR1    | 0.75  |
| hsa-mir-381    | TMEM10    | 0.72  |
| hsa-mir-381    | TMEM16C   | 0.73  |
| hsa-mir-381    | TRIM24    | -0.61 |
| hsa-mir-381    | USMG5     | 0.55  |
| hsa-mir-381    | VSNL1     | 0.73  |
| hsa-mir-381    | WNT10B    | 0.78  |
| hsa-mir-381    | YPEL2     | 0.62  |
| hsa-mir-381    | ZNF365    | 0.70  |
| hsa-mir-381    | ZNF702    | 0.75  |
| hsa-mir-382    | CMIP      | 0.60  |
| hsa-mir-382    | EYA1      | -0.41 |
| hsa-mir-382    | SCGB2A1   | -0.46 |
| hsa-mir-409-3p | ATP6V1H   | 0.61  |
| hsa-mir-409-3p | C10orf35  | 0.53  |
| hsa-mir-409-3p | CLEC12B   | 0.58  |
| hsa-mir-409-3p | EMX1      | 0.45  |
| hsa-mir-409-3p | FAM19A2   | 0.50  |
| hsa-mir-409-3p | LOC400120 | 0.48  |
| hsa-mir-409-3p | NBL1      | 0.67  |
| hsa-mir-409-3p | OPN3      | 0.51  |
| hsa-mir-409-3p | PDE6H     | 0.59  |
| hsa-mir-409-3p | ROBO1     | -0.46 |
| hsa-mir-409-3p | VDAC2     | 0.55  |
| hsa-mir-410    | 5-Sep     | 0.66  |
| hsa-mir-410    | ACTL6A    | -0.65 |
| hsa-mir-410    | ANKRD34   | 0.74  |
| hsa-mir-410    | APBB1     | 0.72  |
| hsa-mir-410    | ARRB1     | 0.72  |
| hsa-mir-410    | ATP2B3    | 0.65  |
| hsa-mir-410    | ATXN7L3   | 0.83  |
| hsa-mir-410    | C1QTNF4   | 0.56  |
| hsa-mir-410    | C8orf37   | -0.63 |
| hsa-mir-410    | CA11      | 0.79  |
| hsa-mir-410    | CACNG3    | 0.65  |
| hsa-mir-410    | CAMK1G    | 0.72  |
| hsa-mir-410    | CAMK2A    | 0.70  |
| hsa-mir-410    | CBLN2     | 0.69  |
| hsa-mir-410    | CBLN4     | 0.70  |

|             |           |       |
|-------------|-----------|-------|
| hsa-mir-410 | CBX6      | 0.79  |
| hsa-mir-410 | CNKS2     | 0.63  |
| hsa-mir-410 | CPLX2     | 0.74  |
| hsa-mir-410 | DCLK3     | 0.60  |
| hsa-mir-410 | DOK6      | 0.73  |
| hsa-mir-410 | FAM79A    | 0.69  |
| hsa-mir-410 | FLJ37464  | 0.63  |
| hsa-mir-410 | FMNL1     | 0.67  |
| hsa-mir-410 | GALNT9    | 0.69  |
| hsa-mir-410 | HPCA      | 0.67  |
| hsa-mir-410 | KCNJ4     | 0.79  |
| hsa-mir-410 | KCNV1     | 0.70  |
| hsa-mir-410 | LOC400120 | 0.63  |
| hsa-mir-410 | LRTM2     | 0.74  |
| hsa-mir-410 | LUZP1     | 0.58  |
| hsa-mir-410 | MAP1D     | -0.65 |
| hsa-mir-410 | MAPK3     | 0.64  |
| hsa-mir-410 | NAPB      | 0.74  |
| hsa-mir-410 | NRGN      | 0.71  |
| hsa-mir-410 | PAK1      | 0.69  |
| hsa-mir-410 | PNCK      | 0.73  |
| hsa-mir-410 | PWWP2     | 0.70  |
| hsa-mir-410 | RAB26     | 0.64  |
| hsa-mir-410 | RASAL1    | 0.74  |
| hsa-mir-410 | RSPO2     | 0.73  |
| hsa-mir-410 | SLC17A7   | 0.74  |
| hsa-mir-410 | SLC8A2    | 0.80  |
| hsa-mir-410 | SNCG      | 0.74  |
| hsa-mir-410 | SOHLH2    | -0.66 |
| hsa-mir-410 | STYK1     | 0.74  |
| hsa-mir-410 | SYCE1     | 0.73  |
| hsa-mir-410 | SYT4      | 0.51  |
| hsa-mir-410 | TMEM10    | 0.64  |
| hsa-mir-410 | TNNT2     | 0.80  |
| hsa-mir-410 | WNT10B    | 0.71  |
| hsa-mir-411 | COG1      | 0.51  |
| hsa-mir-411 | CRHBP     | 0.60  |
| hsa-mir-411 | DUSP8     | 0.59  |
| hsa-mir-411 | ICAM5     | 0.70  |
| hsa-mir-411 | NCDN      | 0.70  |
| hsa-mir-411 | NDUFB8    | 0.56  |
| hsa-mir-411 | NIPA1     | 0.59  |
| hsa-mir-411 | NUAK1     | 0.63  |
| hsa-mir-411 | SLC8A2    | 0.62  |
| hsa-mir-411 | SUSD5     | 0.63  |
| hsa-mir-411 | TMEM24    | 0.47  |
| hsa-mir-411 | TSPAN6    | -0.54 |
| hsa-mir-411 | ZBTB7A    | 0.66  |
| hsa-mir-421 | APC       | -0.43 |
| hsa-mir-421 | ARHGEF12  | -0.53 |
| hsa-mir-421 | CELSR2    | -0.62 |
| hsa-mir-421 | CHRM2     | -0.57 |
| hsa-mir-421 | COMMD3    | 0.53  |
| hsa-mir-421 | EXOC8     | -0.46 |
| hsa-mir-421 | IL23A     | 0.58  |
| hsa-mir-421 | KIF3B     | -0.49 |



|                |          |       |
|----------------|----------|-------|
| hsa-mir-421    | MRP63    | 0.59  |
| hsa-mir-421    | SORT1    | -0.60 |
| hsa-mir-421    | SV2A     | -0.59 |
| hsa-mir-421    | TTR      | 0.66  |
| hsa-mir-421    | ZNF271   | -0.61 |
| hsa-mir-422a   | COQ5     | -0.46 |
| hsa-mir-422a   | NAG      | 0.48  |
| hsa-mir-422b   | C21orf91 | 0.59  |
| hsa-mir-423    | C9orf95  | -0.48 |
| hsa-mir-423    | CSPG4    | 0.44  |
| hsa-mir-423    | NEBL     | -0.41 |
| hsa-mir-423    | WISP1    | 0.62  |
| hsa-mir-424    | AMPH     | -0.48 |
| hsa-mir-424    | CXCR7    | 0.44  |
| hsa-mir-424    | RIMS2    | -0.43 |
| hsa-mir-425-3p | DHRS9    | 0.56  |
| hsa-mir-425-5p | C4orf18  | -0.56 |
| hsa-mir-425-5p | GNG5     | -0.52 |
| hsa-mir-425-5p | NPAS2    | 0.64  |
| hsa-mir-432    | CCDC3    | 0.49  |
| hsa-mir-432    | GPC5     | 0.59  |
| hsa-mir-433    | ACCN1    | 0.72  |
| hsa-mir-433    | ACTL6B   | 0.72  |
| hsa-mir-433    | ACVR1C   | 0.71  |
| hsa-mir-433    | ADCY3    | 0.45  |
| hsa-mir-433    | AMPH     | 0.60  |
| hsa-mir-433    | APBB1    | 0.72  |
| hsa-mir-433    | ATP6V1A  | 0.71  |
| hsa-mir-433    | BEGAIN   | 0.72  |
| hsa-mir-433    | BHLHB5   | 0.68  |
| hsa-mir-433    | BRSK2    | 0.64  |
| hsa-mir-433    | C19orf44 | -0.63 |
| hsa-mir-433    | C2orf55  | 0.59  |
| hsa-mir-433    | C5orf40  | 0.67  |
| hsa-mir-433    | C6orf154 | 0.68  |
| hsa-mir-433    | CAMKK2   | 0.74  |
| hsa-mir-433    | CCDC85A  | 0.69  |
| hsa-mir-433    | CCNY     | 0.61  |
| hsa-mir-433    | CENTA1   | 0.70  |
| hsa-mir-433    | CHGB     | 0.62  |
| hsa-mir-433    | CHST1    | 0.60  |
| hsa-mir-433    | CLTB     | 0.70  |
| hsa-mir-433    | CNKS2    | 0.77  |
| hsa-mir-433    | CPLX2    | 0.74  |
| hsa-mir-433    | CPNE6    | 0.68  |
| hsa-mir-433    | CRTAC1   | 0.59  |
| hsa-mir-433    | CYFIP2   | 0.65  |
| hsa-mir-433    | CYP4X1   | 0.76  |
| hsa-mir-433    | DACH1    | 0.43  |
| hsa-mir-433    | DACH2    | 0.75  |
| hsa-mir-433    | DCLK3    | 0.58  |
| hsa-mir-433    | DIXDC1   | 0.69  |
| hsa-mir-433    | DLGAP2   | 0.67  |
| hsa-mir-433    | DOC2A    | 0.76  |
| hsa-mir-433    | DRD1IP   | 0.71  |
| hsa-mir-433    | DUSP8    | 0.73  |

|             |          |       |
|-------------|----------|-------|
| hsa-mir-433 | EDG2     | 0.59  |
| hsa-mir-433 | EFCBP2   | 0.69  |
| hsa-mir-433 | ELOVL7   | 0.61  |
| hsa-mir-433 | FAM19A2  | 0.76  |
| hsa-mir-433 | FAM55C   | 0.56  |
| hsa-mir-433 | FAM79A   | 0.77  |
| hsa-mir-433 | FLJ22639 | -0.63 |
| hsa-mir-433 | FMNL1    | 0.68  |
| hsa-mir-433 | FRMPD1   | 0.51  |
| hsa-mir-433 | FSTL5    | 0.75  |
| hsa-mir-433 | GABRA2   | 0.61  |
| hsa-mir-433 | GALNT9   | 0.70  |
| hsa-mir-433 | GJB6     | 0.67  |
| hsa-mir-433 | GLT8D2   | 0.44  |
| hsa-mir-433 | GRM7     | 0.70  |
| hsa-mir-433 | GUCY1A3  | 0.72  |
| hsa-mir-433 | GUCY1B3  | 0.70  |
| hsa-mir-433 | HMGCLL1  | 0.79  |
| hsa-mir-433 | HPCAL4   | 0.57  |
| hsa-mir-433 | HS6ST3   | 0.71  |
| hsa-mir-433 | KCNH3    | 0.71  |
| hsa-mir-433 | KCNV1    | 0.75  |
| hsa-mir-433 | KLHL2    | 0.64  |
| hsa-mir-433 | LANCL1   | 0.63  |
| hsa-mir-433 | LOR      | 0.65  |
| hsa-mir-433 | LRRTM1   | 0.42  |
| hsa-mir-433 | MAGEE1   | 0.65  |
| hsa-mir-433 | MAST3    | 0.76  |
| hsa-mir-433 | MC4R     | 0.75  |
| hsa-mir-433 | MGC39606 | 0.63  |
| hsa-mir-433 | MPO      | 0.54  |
| hsa-mir-433 | MTMR12   | 0.56  |
| hsa-mir-433 | NDST2    | 0.72  |
| hsa-mir-433 | NGB      | 0.78  |
| hsa-mir-433 | PDE1B    | 0.72  |
| hsa-mir-433 | PNCK     | 0.80  |
| hsa-mir-433 | PPP1R16B | 0.71  |
| hsa-mir-433 | PRICKLE1 | 0.54  |
| hsa-mir-433 | PRRT1    | 0.77  |
| hsa-mir-433 | PSD      | 0.78  |
| hsa-mir-433 | RAPGEF4  | 0.71  |
| hsa-mir-433 | RASAL1   | 0.76  |
| hsa-mir-433 | REPS2    | 0.70  |
| hsa-mir-433 | RPE65    | -0.48 |
| hsa-mir-433 | RUNDC3A  | 0.71  |
| hsa-mir-433 | SGPP2    | 0.67  |
| hsa-mir-433 | SHANK1   | 0.66  |
| hsa-mir-433 | SLC17A6  | 0.67  |
| hsa-mir-433 | SYCE1    | 0.75  |
| hsa-mir-433 | TLL1     | 0.67  |
| hsa-mir-433 | TPM3     | 0.71  |
| hsa-mir-433 | TRPM2    | 0.63  |
| hsa-mir-433 | USP11    | 0.59  |
| hsa-mir-433 | YWHAH    | 0.72  |
| hsa-mir-448 | KRTAP6-3 | 0.85  |
| hsa-mir-448 | KRTAP8-1 | 0.70  |

|                |           |       |
|----------------|-----------|-------|
| hsa-mir-450    | C20orf75  | -0.59 |
| hsa-mir-451    | HTATIP2   | -0.54 |
| hsa-mir-452    | 10-Mar    | -0.52 |
| hsa-mir-452    | C21orf94  | 0.61  |
| hsa-mir-452    | C22orf23  | -0.53 |
| hsa-mir-455    | KCNT1     | -0.70 |
| hsa-mir-484    | PLAC1     | 0.33  |
| hsa-mir-484    | TCEAL3    | -0.49 |
| hsa-mir-484    | ZNF554    | -0.42 |
| hsa-mir-485-3p | STAT4     | 0.51  |
| hsa-mir-485-5p | 11-Mar    | 0.83  |
| hsa-mir-485-5p | ABHD7     | 0.69  |
| hsa-mir-485-5p | ACCN1     | 0.79  |
| hsa-mir-485-5p | ANKRD34   | 0.77  |
| hsa-mir-485-5p | ARPP-21   | 0.63  |
| hsa-mir-485-5p | ATRN1     | 0.67  |
| hsa-mir-485-5p | BTBD10    | 0.55  |
| hsa-mir-485-5p | C13orf16  | 0.67  |
| hsa-mir-485-5p | CACNB1    | 0.72  |
| hsa-mir-485-5p | CCDC102A  | -0.40 |
| hsa-mir-485-5p | CDH12     | 0.83  |
| hsa-mir-485-5p | CDKN2D    | 0.74  |
| hsa-mir-485-5p | CNTN6     | 0.66  |
| hsa-mir-485-5p | COL4A6    | -0.63 |
| hsa-mir-485-5p | CUL2      | 0.53  |
| hsa-mir-485-5p | DYNC1I1   | 0.64  |
| hsa-mir-485-5p | DYSF      | 0.56  |
| hsa-mir-485-5p | EFHA2     | 0.73  |
| hsa-mir-485-5p | EMX1      | 0.61  |
| hsa-mir-485-5p | ENTPD3    | 0.64  |
| hsa-mir-485-5p | FAM19A2   | 0.76  |
| hsa-mir-485-5p | FLJ33534  | 0.66  |
| hsa-mir-485-5p | FSTL5     | 0.80  |
| hsa-mir-485-5p | FUT9      | 0.52  |
| hsa-mir-485-5p | GLS       | 0.74  |
| hsa-mir-485-5p | GPRASP2   | 0.67  |
| hsa-mir-485-5p | GRM7      | 0.70  |
| hsa-mir-485-5p | HPRT1     | 0.74  |
| hsa-mir-485-5p | HS6ST3    | 0.74  |
| hsa-mir-485-5p | HTR2C     | 0.82  |
| hsa-mir-485-5p | KCNS1     | 0.72  |
| hsa-mir-485-5p | KCNS2     | 0.71  |
| hsa-mir-485-5p | KLHL2     | 0.72  |
| hsa-mir-485-5p | LOC554175 | 0.81  |
| hsa-mir-485-5p | MAGEE1    | 0.69  |
| hsa-mir-485-5p | MAP7D2    | 0.83  |
| hsa-mir-485-5p | MC4R      | 0.78  |
| hsa-mir-485-5p | MLLT11    | 0.59  |
| hsa-mir-485-5p | NAPB      | 0.83  |
| hsa-mir-485-5p | NDUFB8    | 0.68  |
| hsa-mir-485-5p | NPTN      | 0.71  |
| hsa-mir-485-5p | NRSN1     | 0.53  |
| hsa-mir-485-5p | NSF       | 0.72  |
| hsa-mir-485-5p | OPRK1     | 0.71  |
| hsa-mir-485-5p | PDE1B     | 0.73  |
| hsa-mir-485-5p | PIP3-E    | 0.67  |

|                |           |       |
|----------------|-----------|-------|
| hsa-mir-485-5p | PNCK      | 0.86  |
| hsa-mir-485-5p | PPM2C     | 0.67  |
| hsa-mir-485-5p | PPP2R2C   | 0.75  |
| hsa-mir-485-5p | PPP3CB    | 0.69  |
| hsa-mir-485-5p | PRMT8     | 0.67  |
| hsa-mir-485-5p | RAB40B    | 0.71  |
| hsa-mir-485-5p | RAPGEF4   | 0.67  |
| hsa-mir-485-5p | RFPL1     | 0.74  |
| hsa-mir-485-5p | RFPL3     | 0.70  |
| hsa-mir-485-5p | RGS4      | 0.75  |
| hsa-mir-485-5p | RIMBP2    | 0.76  |
| hsa-mir-485-5p | RSPO2     | 0.73  |
| hsa-mir-485-5p | SCN3B     | 0.59  |
| hsa-mir-485-5p | SH2D5     | 0.70  |
| hsa-mir-485-5p | SLC2A13   | 0.58  |
| hsa-mir-485-5p | SPINT2    | 0.71  |
| hsa-mir-485-5p | SSX2IP    | 0.68  |
| hsa-mir-485-5p | STAT4     | 0.74  |
| hsa-mir-485-5p | STX1A     | 0.72  |
| hsa-mir-485-5p | SYP       | 0.71  |
| hsa-mir-485-5p | TBR1      | 0.67  |
| hsa-mir-485-5p | TMEM155   | 0.71  |
| hsa-mir-485-5p | TOMM20    | 0.65  |
| hsa-mir-485-5p | TUBA8     | 0.73  |
| hsa-mir-485-5p | WDR47     | 0.63  |
| hsa-mir-485-5p | YWHAH     | 0.74  |
| hsa-mir-486    | C14orf128 | -0.62 |
| hsa-mir-486    | FLJ13195  | -0.27 |
| hsa-mir-486    | ZFP62     | -0.52 |
| hsa-mir-487a   | ENDOGL1   | -0.57 |
| hsa-mir-487a   | GGTLA4    | 0.53  |
| hsa-mir-487a   | GNB1      | -0.58 |
| hsa-mir-487a   | OR1K1     | 0.59  |
| hsa-mir-487a   | REST      | -0.45 |
| hsa-mir-487a   | SPINK2    | 0.49  |
| hsa-mir-487a   | TMEM39A   | 0.57  |
| hsa-mir-487b   | CENPF     | -0.53 |
| hsa-mir-487b   | FCMD      | -0.55 |
| hsa-mir-487b   | KNTC1     | -0.57 |
| hsa-mir-487b   | ZFHX4     | -0.58 |
| hsa-mir-490    | ACCN1     | 0.66  |
| hsa-mir-490    | ANKRD34   | 0.65  |
| hsa-mir-490    | CAP2      | 0.60  |
| hsa-mir-490    | COL4A6    | -0.58 |
| hsa-mir-490    | HPRT1     | 0.71  |
| hsa-mir-490    | HS6ST3    | 0.60  |
| hsa-mir-490    | NAPB      | 0.62  |
| hsa-mir-490    | PBX3      | -0.64 |
| hsa-mir-490    | PPP2R2C   | 0.72  |
| hsa-mir-490    | RGS4      | 0.66  |
| hsa-mir-490    | SSX2IP    | 0.56  |
| hsa-mir-490    | STAT4     | 0.67  |
| hsa-mir-490    | WDR47     | 0.64  |
| hsa-mir-490    | YWHAH     | 0.57  |
| hsa-mir-491    | 11-Mar    | 0.71  |
| hsa-mir-491    | AJAP1     | 0.65  |

|             |           |       |
|-------------|-----------|-------|
| hsa-mir-491 | ANK1      | 0.74  |
| hsa-mir-491 | ANKRD43   | 0.62  |
| hsa-mir-491 | AR        | -0.55 |
| hsa-mir-491 | ATP8A2    | 0.63  |
| hsa-mir-491 | B4GALT4   | -0.57 |
| hsa-mir-491 | BEGAIN    | 0.54  |
| hsa-mir-491 | C1QL3     | 0.65  |
| hsa-mir-491 | C6orf145  | -0.70 |
| hsa-mir-491 | CAMKV     | 0.66  |
| hsa-mir-491 | CARTPT    | 0.64  |
| hsa-mir-491 | CDH12     | 0.76  |
| hsa-mir-491 | CLEC2L    | 0.64  |
| hsa-mir-491 | COL4A6    | -0.55 |
| hsa-mir-491 | CYP4X1    | 0.75  |
| hsa-mir-491 | DPP10     | 0.62  |
| hsa-mir-491 | DRD5      | 0.75  |
| hsa-mir-491 | DYNC1I1   | 0.73  |
| hsa-mir-491 | EMP1      | -0.74 |
| hsa-mir-491 | EPB41L4B  | 0.74  |
| hsa-mir-491 | FCHO1     | 0.72  |
| hsa-mir-491 | FKBP10    | -0.58 |
| hsa-mir-491 | FMOD      | -0.49 |
| hsa-mir-491 | GABRA2    | 0.71  |
| hsa-mir-491 | GJB6      | 0.73  |
| hsa-mir-491 | GNAI1     | 0.58  |
| hsa-mir-491 | GOT1      | 0.71  |
| hsa-mir-491 | GRIN2A    | 0.73  |
| hsa-mir-491 | GRM4      | 0.72  |
| hsa-mir-491 | HPRT1     | 0.73  |
| hsa-mir-491 | HRNBP3    | 0.65  |
| hsa-mir-491 | KHDRBS2   | 0.68  |
| hsa-mir-491 | KLK5      | 0.68  |
| hsa-mir-491 | LFNG      | -0.71 |
| hsa-mir-491 | LINGO2    | 0.73  |
| hsa-mir-491 | LOC554175 | 0.63  |
| hsa-mir-491 | MAL2      | 0.71  |
| hsa-mir-491 | MC4R      | 0.75  |
| hsa-mir-491 | MCHR2     | 0.70  |
| hsa-mir-491 | MPP7      | 0.78  |
| hsa-mir-491 | NETO1     | 0.73  |
| hsa-mir-491 | NPM2      | 0.73  |
| hsa-mir-491 | NTN4      | 0.77  |
| hsa-mir-491 | OR5L2     | 0.63  |
| hsa-mir-491 | PCDH11Y   | 0.69  |
| hsa-mir-491 | PDE1A     | 0.63  |
| hsa-mir-491 | PHEX      | -0.47 |
| hsa-mir-491 | PHKG1     | -0.57 |
| hsa-mir-491 | PNCK      | 0.74  |
| hsa-mir-491 | PPFIA4    | 0.64  |
| hsa-mir-491 | PPP3CB    | 0.70  |
| hsa-mir-491 | RBP4      | 0.74  |
| hsa-mir-491 | RGS4      | 0.67  |
| hsa-mir-491 | RIMS3     | 0.69  |
| hsa-mir-491 | SHANK1    | 0.63  |
| hsa-mir-491 | SLC27A2   | 0.77  |
| hsa-mir-491 | SLC6A15   | 0.76  |

|                |           |       |
|----------------|-----------|-------|
| hsa-mir-491    | SLIT2     | 0.60  |
| hsa-mir-491    | SMAD1     | -0.63 |
| hsa-mir-491    | STAT4     | 0.76  |
| hsa-mir-491    | SULT4A1   | 0.73  |
| hsa-mir-491    | TMEM16D   | 0.61  |
| hsa-mir-491    | TNNT1     | 0.73  |
| hsa-mir-491    | TOMM20    | 0.63  |
| hsa-mir-491    | TPM3      | 0.67  |
| hsa-mir-491    | UNC13C    | 0.64  |
| hsa-mir-491    | WFDC1     | 0.62  |
| hsa-mir-491    | YWHAH     | 0.65  |
| hsa-mir-492    | C17orf32  | -0.50 |
| hsa-mir-492    | NDE1      | 0.70  |
| hsa-mir-492    | NSD1      | 0.48  |
| hsa-mir-492    | TULP3     | 0.58  |
| hsa-mir-492    | YLPM1     | 0.42  |
| hsa-mir-492    | ZNF281    | 0.65  |
| hsa-mir-492    | ZNF397    | 0.36  |
| hsa-mir-492    | ZNF644    | 0.56  |
| hsa-mir-493-3p | USP37     | 0.58  |
| hsa-mir-494    | CCNT2     | 0.39  |
| hsa-mir-494    | CPSF2     | 0.39  |
| hsa-mir-494    | DDX18     | 0.41  |
| hsa-mir-494    | LNPEP     | 0.49  |
| hsa-mir-494    | NR1D2     | 0.37  |
| hsa-mir-494    | SMEK2     | 0.47  |
| hsa-mir-494    | ZNF141    | 0.31  |
| hsa-mir-494    | ZNF492    | 0.45  |
| hsa-mir-494    | ZNF99     | 0.36  |
| hsa-mir-497    | EDG2      | -0.57 |
| hsa-mir-497    | KCNH2     | 0.53  |
| hsa-mir-498    | JUN       | 0.51  |
| hsa-mir-498    | PLAU      | 0.55  |
| hsa-mir-498    | ST3GAL1   | 0.68  |
| hsa-mir-500    | PPP1R2P1  | -0.48 |
| hsa-mir-504    | ANAPC13   | 0.44  |
| hsa-mir-504    | ATP6V1C2  | 0.56  |
| hsa-mir-504    | BCL11B    | 0.52  |
| hsa-mir-504    | GBP3      | -0.43 |
| hsa-mir-504    | HLA-G     | -0.52 |
| hsa-mir-504    | HM13      | -0.62 |
| hsa-mir-504    | LOC162073 | -0.56 |
| hsa-mir-504    | MGC35440  | -0.52 |
| hsa-mir-504    | MTTP      | -0.53 |
| hsa-mir-504    | PRRC1     | -0.67 |
| hsa-mir-504    | SLC28A2   | -0.54 |
| hsa-mir-508    | AAAS      | 0.31  |
| hsa-mir-508    | GATAD2B   | 0.33  |
| hsa-mir-510    | TMEM101   | -0.30 |
| hsa-mir-512-3p | NTN1      | -0.54 |
| hsa-mir-513    | C9orf58   | 0.59  |
| hsa-mir-513    | CLIC4     | 0.47  |
| hsa-mir-515-3p | ATP11B    | 0.86  |
| hsa-mir-515-3p | COPG      | 0.44  |
| hsa-mir-515-3p | DOCK6     | 0.35  |
| hsa-mir-515-3p | KRTAP6-3  | 0.87  |

|                |              |       |
|----------------|--------------|-------|
| hsa-mir-515-3p | KRTAP8-1     | 0.73  |
| hsa-mir-515-3p | TRPC4        | 0.61  |
| hsa-mir-518c*  | HLA-DRB5     | 0.61  |
| hsa-mir-519e   | GM2A         | -0.45 |
| hsa-mir-519e   | KIAA0495     | -0.58 |
| hsa-mir-519e   | NACAD        | -0.54 |
| hsa-mir-519e   | OR10A7       | 0.49  |
| hsa-mir-519e   | OR8J3        | 0.67  |
| hsa-mir-519e   | PPAP2B       | -0.51 |
| hsa-mir-519e   | RP5-1103G7.6 | 0.71  |
| hsa-mir-519e   | SMPD1        | -0.49 |
| hsa-mir-519e   | TMEM184A     | 0.57  |
| hsa-mir-519e   | TMEM89       | 0.56  |
| hsa-mir-519e   | TMTC2        | -0.47 |
| hsa-mir-519e   | WDR82        | -0.69 |
| hsa-mir-519e*  | APC          | -0.45 |
| hsa-mir-519e*  | CECR6        | -0.46 |
| hsa-mir-519e*  | CMTM4        | -0.57 |
| hsa-mir-519e*  | DIRAS2       | -0.38 |
| hsa-mir-519e*  | KCNK10       | -0.43 |
| hsa-mir-519e*  | KIAA0368     | -0.60 |
| hsa-mir-519e*  | LOC375748    | -0.56 |
| hsa-mir-519e*  | MIA3         | -0.49 |
| hsa-mir-519e*  | MRPS12       | 0.54  |
| hsa-mir-519e*  | POLR1A       | 0.45  |
| hsa-mir-519e*  | SET          | -0.57 |
| hsa-mir-519e*  | SETD1B       | -0.69 |
| hsa-mir-519e*  | STAC2        | -0.39 |
| hsa-mir-519e*  | STK16        | 0.69  |
| hsa-mir-519e*  | TCL6         | 0.62  |
| hsa-mir-519e*  | TIMM50       | 0.54  |
| hsa-mir-519e*  | TMPRSS6      | 0.47  |
| hsa-mir-519e*  | TRAPPC3      | 0.46  |
| hsa-mir-519e*  | UBE2R2       | -0.65 |
| hsa-mir-519e*  | WHSC1        | -0.65 |
| hsa-mir-520b   | C17orf61     | -0.51 |
| hsa-mir-520b   | FLJ36208     | -0.53 |
| hsa-mir-520d   | KRTAP6-3     | 0.86  |
| hsa-mir-520d   | KRTAP8-1     | 0.70  |
| hsa-mir-520d   | PPP1R3A      | 0.47  |
| hsa-mir-520d*  | CLIC2        | 0.48  |
| hsa-mir-520d*  | WDR45L       | -0.53 |
| hsa-mir-520e   | APIP         | -0.56 |
| hsa-mir-520e   | COQ5         | -0.50 |
| hsa-mir-520e   | ISYNA1       | 0.62  |
| hsa-mir-520e   | LOC90379     | 0.55  |
| hsa-mir-520e   | MBD3         | 0.45  |
| hsa-mir-520e   | PTRH2        | -0.64 |
| hsa-mir-520e   | SLC4A2       | 0.56  |
| hsa-mir-526b*  | EPHB3        | 0.62  |
| hsa-mir-526b*  | KRTAP6-3     | 0.86  |
| hsa-mir-526b*  | KRTAP8-1     | 0.71  |
| hsa-mir-526b*  | PAG1         | 0.44  |
| hsa-mir-526b*  | TRPC4        | 0.60  |
| hsa-mir-527    | CLIC2        | 0.47  |
| hsa-mir-532    | DTX3         | 0.48  |

|                |           |       |
|----------------|-----------|-------|
| hsa-mir-532    | FANCM     | -0.61 |
| hsa-mir-532    | IBTK      | -0.60 |
| hsa-mir-532    | MOSPD2    | -0.39 |
| hsa-mir-532    | PPP2R5E   | -0.65 |
| hsa-mir-532    | TBX18     | 0.48  |
| hsa-mir-542-3p | ACAD8     | 0.50  |
| hsa-mir-548a   | KRTAP6-3  | 0.85  |
| hsa-mir-550    | CHM       | -0.54 |
| hsa-mir-550    | HOXD4     | -0.77 |
| hsa-mir-550    | NR1D2     | -0.52 |
| hsa-mir-550    | RPE65     | 0.51  |
| hsa-mir-550    | TAP2      | 0.50  |
| hsa-mir-550    | WDR47     | -0.43 |
| hsa-mir-551b   | CBR4      | -0.40 |
| hsa-mir-551b   | GADD45G   | 0.75  |
| hsa-mir-551b   | IFIT1     | -0.40 |
| hsa-mir-551b   | RPLP0     | 0.57  |
| hsa-mir-551b   | SERPINA13 | 0.56  |
| hsa-mir-551b   | WNK4      | 0.45  |
| hsa-mir-557    | ALK       | 0.46  |
| hsa-mir-557    | C17orf32  | -0.38 |
| hsa-mir-557    | C9orf58   | 0.69  |
| hsa-mir-557    | EDG2      | 0.49  |
| hsa-mir-557    | GADD45G   | -0.58 |
| hsa-mir-557    | IL20RB    | -0.51 |
| hsa-mir-557    | LRRC3B    | 0.43  |
| hsa-mir-557    | RHBDL2    | 0.48  |
| hsa-mir-557    | ST3GAL1   | 0.57  |
| hsa-mir-557    | ZNF764    | -0.57 |
| hsa-mir-560    | CALB2     | 0.50  |
| hsa-mir-560    | SELS      | -0.50 |
| hsa-mir-560    | SNPH      | 0.42  |
| hsa-mir-563    | DHRS9     | 0.58  |
| hsa-mir-565    | ADORA1    | -0.60 |
| hsa-mir-565    | C15orf44  | 0.65  |
| hsa-mir-565    | CSNK1G2   | -0.61 |
| hsa-mir-565    | CSR1      | -0.59 |
| hsa-mir-565    | DDC       | 0.58  |
| hsa-mir-565    | NDRG4     | -0.48 |
| hsa-mir-565    | PCID2     | 0.50  |
| hsa-mir-565    | POLR1C    | 0.59  |
| hsa-mir-565    | RAB38     | 0.50  |
| hsa-mir-565    | RETSAT    | -0.63 |
| hsa-mir-565    | RGAG4     | -0.67 |
| hsa-mir-565    | SUPT3H    | 0.68  |
| hsa-mir-565    | TMPRSS2   | 0.55  |
| hsa-mir-565    | TRPM4     | -0.68 |
| hsa-mir-571    | CCK       | -0.32 |
| hsa-mir-571    | CDH9      | -0.45 |
| hsa-mir-571    | FLJ44048  | 0.63  |
| hsa-mir-571    | GABRB3    | -0.55 |
| hsa-mir-571    | GDA       | -0.46 |
| hsa-mir-571    | ISY1      | 0.43  |
| hsa-mir-571    | MAL2      | -0.48 |
| hsa-mir-571    | NEFM      | -0.42 |
| hsa-mir-571    | SSX2IP    | -0.46 |



|             |           |       |
|-------------|-----------|-------|
| hsa-mir-571 | SULT4A1   | -0.44 |
| hsa-mir-571 | VSNL1     | -0.45 |
| hsa-mir-571 | ZDBF2     | -0.62 |
| hsa-mir-572 | WDR5B     | -0.50 |
| hsa-mir-574 | CABC1     | -0.52 |
| hsa-mir-574 | KCNQ3     | -0.45 |
| hsa-mir-574 | LSM14B    | -0.59 |
| hsa-mir-574 | LYPLA1    | 0.57  |
| hsa-mir-574 | MECP2     | -0.48 |
| hsa-mir-574 | NT5DC3    | -0.55 |
| hsa-mir-574 | RNUXA     | -0.45 |
| hsa-mir-574 | SRPR      | -0.51 |
| hsa-mir-574 | TPP1      | -0.64 |
| hsa-mir-574 | VPS37C    | -0.58 |
| hsa-mir-574 | WBSCR18   | -0.52 |
| hsa-mir-575 | C18orf18  | -0.56 |
| hsa-mir-575 | NR1D2     | 0.51  |
| hsa-mir-575 | RPE65     | -0.55 |
| hsa-mir-575 | ZNF492    | 0.46  |
| hsa-mir-583 | COQ5      | -0.56 |
| hsa-mir-584 | CAMK2N1   | 0.54  |
| hsa-mir-584 | DOCK4     | 0.59  |
| hsa-mir-584 | GLT8D1    | -0.74 |
| hsa-mir-584 | IQSEC3    | 0.55  |
| hsa-mir-584 | KCNK1     | 0.62  |
| hsa-mir-584 | LRRC48    | -0.62 |
| hsa-mir-584 | MYBPHL    | 0.51  |
| hsa-mir-584 | NAP1L2    | 0.43  |
| hsa-mir-584 | NT5DC1    | 0.68  |
| hsa-mir-584 | PPP1R13B  | 0.52  |
| hsa-mir-584 | SAAL1     | -0.48 |
| hsa-mir-590 | C8orf34   | 0.49  |
| hsa-mir-590 | EFEMP1    | 0.42  |
| hsa-mir-590 | NUB1      | 0.50  |
| hsa-mir-590 | PCMT1     | -0.47 |
| hsa-mir-590 | YWHAQ     | -0.49 |
| hsa-mir-592 | ACTR3     | -0.58 |
| hsa-mir-592 | C14orf104 | -0.45 |
| hsa-mir-592 | SMARCAD1  | -0.47 |
| hsa-mir-592 | ZC3H7B    | 0.56  |
| hsa-mir-595 | KCNMB4    | -0.57 |
| hsa-mir-595 | LRRC17    | 0.53  |
| hsa-mir-598 | HEATR1    | -0.55 |
| hsa-mir-601 | HLA-DRB5  | 0.52  |
| hsa-mir-602 | DAZAP1    | -0.49 |
| hsa-mir-602 | GRIK3     | -0.58 |
| hsa-mir-605 | C11orf54  | 0.54  |
| hsa-mir-605 | UGCGL2    | 0.48  |
| hsa-mir-610 | CLIC2     | 0.61  |
| hsa-mir-613 | AP3M2     | -0.65 |
| hsa-mir-613 | TMTC1     | -0.55 |
| hsa-mir-615 | CAPZA2    | 0.54  |
| hsa-mir-616 | AFP       | -0.50 |
| hsa-mir-616 | ALX1      | -0.70 |
| hsa-mir-616 | APC2      | 0.40  |
| hsa-mir-616 | BRIP1     | -0.72 |

|             |              |       |
|-------------|--------------|-------|
| hsa-mir-616 | C10orf47     | -0.66 |
| hsa-mir-616 | C10orf63     | 0.61  |
| hsa-mir-616 | C1orf76      | -0.64 |
| hsa-mir-616 | C21orf13     | 0.52  |
| hsa-mir-616 | CALML3       | -0.53 |
| hsa-mir-616 | CPLX4        | -0.64 |
| hsa-mir-616 | CYP4V2       | 0.50  |
| hsa-mir-616 | DNALI1       | 0.48  |
| hsa-mir-616 | DTX2         | -0.57 |
| hsa-mir-616 | EFHC2        | 0.44  |
| hsa-mir-616 | F13B         | -0.66 |
| hsa-mir-616 | GPR87        | -0.58 |
| hsa-mir-616 | HTR1F        | -0.68 |
| hsa-mir-616 | IL22RA2      | 0.48  |
| hsa-mir-616 | ITGB8        | 0.69  |
| hsa-mir-616 | KCNH5        | -0.65 |
| hsa-mir-616 | KLF17        | -0.77 |
| hsa-mir-616 | LAIR2        | -0.65 |
| hsa-mir-616 | MAP3K4       | -0.46 |
| hsa-mir-616 | MGC10850     | -0.56 |
| hsa-mir-616 | MLPH         | -0.61 |
| hsa-mir-616 | MSL2L1       | -0.59 |
| hsa-mir-616 | OXCT2        | -0.62 |
| hsa-mir-616 | PDE6G        | -0.67 |
| hsa-mir-616 | PLEKHN1      | -0.70 |
| hsa-mir-616 | PNPLA1       | -0.62 |
| hsa-mir-616 | POU5F1P4     | -0.61 |
| hsa-mir-616 | RBM43        | 0.55  |
| hsa-mir-616 | RHAG         | -0.57 |
| hsa-mir-616 | RLF          | -0.40 |
| hsa-mir-616 | RORA         | 0.55  |
| hsa-mir-616 | RP6-213H19.1 | -0.47 |
| hsa-mir-616 | RPL10A       | -0.62 |
| hsa-mir-616 | SBSN         | -0.70 |
| hsa-mir-616 | SPANXD       | -0.61 |
| hsa-mir-616 | SPATA13      | 0.62  |
| hsa-mir-616 | SRGAP1       | 0.70  |
| hsa-mir-616 | TM4SF20      | -0.54 |
| hsa-mir-616 | TRIM15       | -0.66 |
| hsa-mir-616 | TSKS         | -0.60 |
| hsa-mir-616 | WDR49        | 0.62  |
| hsa-mir-616 | WDR67        | -0.56 |
| hsa-mir-616 | ZBTB46       | -0.62 |
| hsa-mir-623 | KIAA1614     | 0.55  |
| hsa-mir-623 | MAGEC2       | -0.40 |
| hsa-mir-623 | MRPS23       | -0.45 |
| hsa-mir-623 | MYO7A        | 0.63  |
| hsa-mir-623 | POLR3G       | -0.50 |
| hsa-mir-623 | ST3GAL1      | 0.68  |
| hsa-mir-628 | CCDC128      | 0.57  |
| hsa-mir-628 | FBXL15       | 0.64  |
| hsa-mir-628 | GABRA2       | 0.55  |
| hsa-mir-628 | LMNB1        | -0.49 |
| hsa-mir-629 | RBBP9        | 0.59  |
| hsa-mir-629 | TCF7L1       | 0.54  |
| hsa-mir-630 | ADM2         | -0.46 |

|             |               |       |
|-------------|---------------|-------|
| hsa-mir-630 | ART5          | -0.39 |
| hsa-mir-630 | GSTA2         | -0.40 |
| hsa-mir-630 | MOCOS         | -0.41 |
| hsa-mir-630 | MRPS23        | -0.51 |
| hsa-mir-630 | RP11-529I10.4 | -0.48 |
| hsa-mir-630 | TNFRSF10D     | -0.37 |
| hsa-mir-630 | ZFP90         | 0.44  |
| hsa-mir-630 | ZNF264        | 0.47  |
| hsa-mir-636 | C19orf43      | 0.53  |
| hsa-mir-638 | HEMK1         | -0.54 |
| hsa-mir-638 | WDR5B         | -0.54 |
| hsa-mir-647 | SLC9A3        | -0.43 |
| hsa-mir-648 | CYP11B2       | 0.44  |
| hsa-mir-648 | SLC28A3       | -0.48 |
| hsa-mir-650 | ARAF          | -0.54 |
| hsa-mir-650 | CRTC3         | -0.63 |
| hsa-mir-650 | DAG1          | -0.61 |
| hsa-mir-650 | EI24          | -0.61 |
| hsa-mir-650 | EXTL3         | -0.67 |
| hsa-mir-650 | LMNA          | -0.64 |
| hsa-mir-650 | NAP1L4        | -0.47 |
| hsa-mir-650 | PGM1          | -0.53 |
| hsa-mir-650 | PHF19         | -0.71 |
| hsa-mir-650 | RP11-529I10.4 | 0.57  |
| hsa-mir-650 | SESN1         | 0.56  |
| hsa-mir-650 | SLC5A6        | -0.63 |
| hsa-mir-650 | USP19         | -0.59 |
| hsa-mir-652 | FRYL          | -0.50 |
| hsa-mir-652 | HLA-DPB2      | 0.63  |
| hsa-mir-652 | MMP11         | 0.36  |
| hsa-mir-658 | WFDC8         | 0.46  |
| hsa-mir-659 | LEPROT        | 0.45  |
| hsa-mir-660 | C14orf153     | -0.54 |
| hsa-mir-660 | TSSC4         | 0.56  |
| hsa-mir-660 | YARS2         | -0.59 |
| hsa-mir-660 | ZNF14         | -0.58 |
| hsa-mir-662 | SELS          | -0.54 |
| hsa-mir-663 | RHBDL2        | 0.45  |
| hsa-mir-663 | SNPH          | 0.22  |
| hsa-mir-663 | TMEM98        | 0.51  |
| hsa-mir-671 | CHRM3         | 0.41  |
| hsa-mir-671 | SV2A          | 0.46  |
| hsa-mir-671 | SV2C          | 0.43  |
| hsa-mir-7   | ATXN7L3       | 0.68  |
| hsa-mir-7   | CAMK2A        | 0.74  |
| hsa-mir-7   | CBX6          | 0.73  |
| hsa-mir-7   | DGKZ          | 0.63  |
| hsa-mir-7   | GNG12         | -0.57 |
| hsa-mir-7   | IQSEC3        | 0.75  |
| hsa-mir-7   | KIAA1486      | 0.76  |
| hsa-mir-7   | KIF5A         | 0.63  |
| hsa-mir-7   | LEMD1         | -0.57 |
| hsa-mir-7   | LGI4          | 0.63  |
| hsa-mir-7   | NIPA1         | 0.55  |
| hsa-mir-7   | PSD           | 0.68  |
| hsa-mir-7   | RNF139        | -0.58 |

|                |          |       |
|----------------|----------|-------|
| hsa-mir-7      | SHANK1   | 0.62  |
| hsa-mir-7      | SNCG     | 0.68  |
| hsa-mir-7      | SYCE1    | 0.69  |
| hsa-mir-7      | TNNT2    | 0.75  |
| hsa-mir-7      | TYRO3    | 0.63  |
| hsa-mir-7      | USP11    | 0.69  |
| hsa-mir-765    | CALB2    | 0.52  |
| hsa-mir-765    | CMPK     | 0.62  |
| hsa-mir-765    | HTR2A    | 0.53  |
| hsa-mir-765    | MST1     | -0.59 |
| hsa-mir-768-3p | ADORA1   | -0.48 |
| hsa-mir-768-3p | DIAPH3   | 0.31  |
| hsa-mir-768-5p | PPM1J    | -0.59 |
| hsa-mir-769-3p | CALB2    | 0.45  |
| hsa-mir-769-3p | GADD45G  | -0.47 |
| hsa-mir-769-3p | RHBDL2   | 0.41  |
| hsa-mir-769-5p | 11-Mar   | 0.80  |
| hsa-mir-769-5p | A2BP1    | 0.75  |
| hsa-mir-769-5p | ADAM11   | 0.77  |
| hsa-mir-769-5p | ADRA2C   | 0.70  |
| hsa-mir-769-5p | AJAP1    | 0.65  |
| hsa-mir-769-5p | ANK1     | 0.73  |
| hsa-mir-769-5p | ARHGDIG  | 0.76  |
| hsa-mir-769-5p | ARHGEF7  | 0.67  |
| hsa-mir-769-5p | ATP8A2   | 0.69  |
| hsa-mir-769-5p | ATRN1    | 0.76  |
| hsa-mir-769-5p | BCL11A   | 0.69  |
| hsa-mir-769-5p | BCL2L10  | 0.72  |
| hsa-mir-769-5p | BEGAIN   | 0.74  |
| hsa-mir-769-5p | BRUNOL4  | 0.71  |
| hsa-mir-769-5p | BRUNOL5  | 0.80  |
| hsa-mir-769-5p | C11orf41 | 0.72  |
| hsa-mir-769-5p | C13orf16 | 0.86  |
| hsa-mir-769-5p | C1orf115 | 0.73  |
| hsa-mir-769-5p | C20orf46 | 0.62  |
| hsa-mir-769-5p | C6orf154 | 0.74  |
| hsa-mir-769-5p | C9orf125 | 0.73  |
| hsa-mir-769-5p | CABP1    | 0.81  |
| hsa-mir-769-5p | CACNB1   | 0.84  |
| hsa-mir-769-5p | CACNB2   | 0.70  |
| hsa-mir-769-5p | CAMK1D   | 0.70  |
| hsa-mir-769-5p | CAMKV    | 0.73  |
| hsa-mir-769-5p | CBFA2T3  | 0.77  |
| hsa-mir-769-5p | CBLN2    | 0.74  |
| hsa-mir-769-5p | CDH12    | 0.77  |
| hsa-mir-769-5p | CDH18    | 0.69  |
| hsa-mir-769-5p | CDH7     | 0.83  |
| hsa-mir-769-5p | CDH9     | 0.76  |
| hsa-mir-769-5p | CDKN2D   | 0.81  |
| hsa-mir-769-5p | CKMT1A   | 0.75  |
| hsa-mir-769-5p | CLEC2L   | 0.72  |
| hsa-mir-769-5p | CMTM3    | -0.70 |
| hsa-mir-769-5p | CNKSR2   | 0.84  |
| hsa-mir-769-5p | CNNM1    | 0.76  |
| hsa-mir-769-5p | CNTN3    | 0.77  |
| hsa-mir-769-5p | CNTN4    | 0.70  |

|                |           |       |
|----------------|-----------|-------|
| hsa-mir-769-5p | COL4A6    | -0.61 |
| hsa-mir-769-5p | CORO6     | 0.76  |
| hsa-mir-769-5p | CPLX2     | 0.73  |
| hsa-mir-769-5p | CPNE9     | 0.86  |
| hsa-mir-769-5p | CUTL2     | 0.70  |
| hsa-mir-769-5p | CYP4X1    | 0.82  |
| hsa-mir-769-5p | CYP4Z1    | 0.70  |
| hsa-mir-769-5p | DACT3     | 0.68  |
| hsa-mir-769-5p | DARS      | -0.61 |
| hsa-mir-769-5p | DNM1      | 0.73  |
| hsa-mir-769-5p | DOK6      | 0.75  |
| hsa-mir-769-5p | DRD5      | 0.67  |
| hsa-mir-769-5p | DSC1      | 0.68  |
| hsa-mir-769-5p | DUSP8     | 0.67  |
| hsa-mir-769-5p | EFHA2     | 0.78  |
| hsa-mir-769-5p | ELOVL7    | 0.70  |
| hsa-mir-769-5p | ENTPD6    | 0.73  |
| hsa-mir-769-5p | EPHB6     | 0.74  |
| hsa-mir-769-5p | EVL       | 0.63  |
| hsa-mir-769-5p | EXTL1     | 0.70  |
| hsa-mir-769-5p | FAAH      | 0.70  |
| hsa-mir-769-5p | FABP6     | 0.68  |
| hsa-mir-769-5p | FAM107B   | 0.66  |
| hsa-mir-769-5p | FAM123C   | 0.75  |
| hsa-mir-769-5p | FAM131A   | 0.65  |
| hsa-mir-769-5p | FAM19A2   | 0.84  |
| hsa-mir-769-5p | FBXL16    | 0.71  |
| hsa-mir-769-5p | FBXO41    | 0.77  |
| hsa-mir-769-5p | FBXW7     | 0.80  |
| hsa-mir-769-5p | FCHO1     | 0.66  |
| hsa-mir-769-5p | FLJ11235  | 0.71  |
| hsa-mir-769-5p | FLJ33534  | 0.84  |
| hsa-mir-769-5p | FLJ37464  | 0.70  |
| hsa-mir-769-5p | FLT3      | 0.57  |
| hsa-mir-769-5p | GABARAPL3 | 0.75  |
| hsa-mir-769-5p | GABRB3    | 0.71  |
| hsa-mir-769-5p | GALNT9    | 0.73  |
| hsa-mir-769-5p | GLS       | 0.75  |
| hsa-mir-769-5p | GLS2      | 0.82  |
| hsa-mir-769-5p | GLT1D1    | 0.79  |
| hsa-mir-769-5p | GREM2     | 0.74  |
| hsa-mir-769-5p | GRM4      | 0.70  |
| hsa-mir-769-5p | GRM7      | 0.78  |
| hsa-mir-769-5p | GUCA1B    | 0.73  |
| hsa-mir-769-5p | HECW1     | 0.81  |
| hsa-mir-769-5p | HIST1H3E  | -0.58 |
| hsa-mir-769-5p | HOMER1    | 0.69  |
| hsa-mir-769-5p | HPCAL1    | 0.63  |
| hsa-mir-769-5p | HPRT1     | 0.72  |
| hsa-mir-769-5p | HRH3      | 0.81  |
| hsa-mir-769-5p | HRNBP3    | 0.79  |
| hsa-mir-769-5p | HTR1E     | 0.84  |
| hsa-mir-769-5p | HTR5A     | 0.82  |
| hsa-mir-769-5p | ICAM5     | 0.74  |
| hsa-mir-769-5p | ID3       | -0.61 |
| hsa-mir-769-5p | INA       | 0.79  |

|                |           |       |
|----------------|-----------|-------|
| hsa-mir-769-5p | INPP5A    | 0.71  |
| hsa-mir-769-5p | INPP5F    | 0.75  |
| hsa-mir-769-5p | INSM2     | 0.80  |
| hsa-mir-769-5p | ITPKA     | 0.69  |
| hsa-mir-769-5p | JPH3      | 0.71  |
| hsa-mir-769-5p | KCNB2     | 0.80  |
| hsa-mir-769-5p | KCNC2     | 0.73  |
| hsa-mir-769-5p | KCNIP2    | 0.71  |
| hsa-mir-769-5p | KCNK12    | 0.75  |
| hsa-mir-769-5p | KCNK3     | 0.74  |
| hsa-mir-769-5p | KCNT1     | 0.57  |
| hsa-mir-769-5p | KHDRBS2   | 0.71  |
| hsa-mir-769-5p | KIAA0284  | 0.71  |
| hsa-mir-769-5p | KIAA1086  | 0.74  |
| hsa-mir-769-5p | KIAA1239  | 0.84  |
| hsa-mir-769-5p | KIAA1324  | 0.79  |
| hsa-mir-769-5p | KIF5A     | 0.78  |
| hsa-mir-769-5p | KRT222P   | 0.80  |
| hsa-mir-769-5p | KSR2      | 0.65  |
| hsa-mir-769-5p | LDB3      | 0.66  |
| hsa-mir-769-5p | LINGO2    | 0.72  |
| hsa-mir-769-5p | LMO7      | 0.79  |
| hsa-mir-769-5p | LOC400451 | 0.81  |
| hsa-mir-769-5p | LOC554175 | 0.83  |
| hsa-mir-769-5p | LRFN5     | 0.74  |
| hsa-mir-769-5p | LRRC7     | 0.80  |
| hsa-mir-769-5p | LRTM2     | 0.76  |
| hsa-mir-769-5p | MAL2      | 0.74  |
| hsa-mir-769-5p | MAST3     | 0.73  |
| hsa-mir-769-5p | MC4R      | 0.71  |
| hsa-mir-769-5p | MCF2L2    | 0.51  |
| hsa-mir-769-5p | MCHR2     | 0.91  |
| hsa-mir-769-5p | MEF2C     | 0.74  |
| hsa-mir-769-5p | MICAL2    | 0.83  |
| hsa-mir-769-5p | MUM1L1    | 0.75  |
| hsa-mir-769-5p | NAPB      | 0.81  |
| hsa-mir-769-5p | NBL1      | 0.62  |
| hsa-mir-769-5p | NEFL      | 0.65  |
| hsa-mir-769-5p | NEFM      | 0.75  |
| hsa-mir-769-5p | NES       | -0.68 |
| hsa-mir-769-5p | NETO1     | 0.68  |
| hsa-mir-769-5p | NEUROD6   | 0.77  |
| hsa-mir-769-5p | NGEF      | 0.77  |
| hsa-mir-769-5p | NMB       | -0.58 |
| hsa-mir-769-5p | NPM2      | 0.83  |
| hsa-mir-769-5p | NPTX1     | 0.69  |
| hsa-mir-769-5p | NRGN      | 0.68  |
| hsa-mir-769-5p | NUP155    | -0.61 |
| hsa-mir-769-5p | NY-REN-7  | 0.84  |
| hsa-mir-769-5p | OLFM1     | 0.71  |
| hsa-mir-769-5p | OLFM3     | 0.77  |
| hsa-mir-769-5p | OR2L13    | 0.77  |
| hsa-mir-769-5p | PCDH11Y   | 0.73  |
| hsa-mir-769-5p | PCLO      | 0.79  |
| hsa-mir-769-5p | PDE2A     | 0.69  |
| hsa-mir-769-5p | PDE4A     | 0.67  |

|                |           |       |
|----------------|-----------|-------|
| hsa-mir-769-5p | PI4KA     | 0.72  |
| hsa-mir-769-5p | PIP3-E    | 0.78  |
| hsa-mir-769-5p | PITPNM2   | 0.68  |
| hsa-mir-769-5p | PITRM1    | 0.65  |
| hsa-mir-769-5p | PNCK      | 0.85  |
| hsa-mir-769-5p | PNMA3     | 0.80  |
| hsa-mir-769-5p | PNMA5     | 0.79  |
| hsa-mir-769-5p | POPDC3    | 0.76  |
| hsa-mir-769-5p | PPFIA4    | 0.76  |
| hsa-mir-769-5p | PPM1H     | 0.74  |
| hsa-mir-769-5p | PPP1R16B  | 0.76  |
| hsa-mir-769-5p | PRKCB1    | 0.75  |
| hsa-mir-769-5p | PRRT1     | 0.79  |
| hsa-mir-769-5p | PSD       | 0.80  |
| hsa-mir-769-5p | PSD3      | 0.77  |
| hsa-mir-769-5p | PVALB     | 0.76  |
| hsa-mir-769-5p | R3HDM1    | 0.68  |
| hsa-mir-769-5p | RAB11FIP4 | 0.67  |
| hsa-mir-769-5p | RAB3A     | 0.71  |
| hsa-mir-769-5p | RAC3      | 0.77  |
| hsa-mir-769-5p | RAPGEF4   | 0.72  |
| hsa-mir-769-5p | RASAL1    | 0.79  |
| hsa-mir-769-5p | RBP4      | 0.77  |
| hsa-mir-769-5p | RDHE2     | 0.82  |
| hsa-mir-769-5p | RFPL2     | 0.85  |
| hsa-mir-769-5p | RFPL3     | 0.83  |
| hsa-mir-769-5p | RIMBP2    | 0.76  |
| hsa-mir-769-5p | RIMS2     | 0.76  |
| hsa-mir-769-5p | RSPO3     | 0.74  |
| hsa-mir-769-5p | RTN4R     | 0.78  |
| hsa-mir-769-5p | RTN4RL1   | 0.83  |
| hsa-mir-769-5p | RUNX1T1   | 0.55  |
| hsa-mir-769-5p | RXFP1     | 0.65  |
| hsa-mir-769-5p | RYR2      | 0.81  |
| hsa-mir-769-5p | SCAMP5    | 0.71  |
| hsa-mir-769-5p | SCN8A     | 0.78  |
| hsa-mir-769-5p | SH2D5     | 0.85  |
| hsa-mir-769-5p | SH3GL3    | 0.72  |
| hsa-mir-769-5p | SH3GLB2   | 0.62  |
| hsa-mir-769-5p | SHANK2    | 0.79  |
| hsa-mir-769-5p | SLC12A5   | 0.77  |
| hsa-mir-769-5p | SLC17A6   | 0.77  |
| hsa-mir-769-5p | SLC17A7   | 0.74  |
| hsa-mir-769-5p | SLC1A6    | 0.79  |
| hsa-mir-769-5p | SLC26A8   | 0.78  |
| hsa-mir-769-5p | SLC30A3   | 0.74  |
| hsa-mir-769-5p | SLC35F2   | -0.74 |
| hsa-mir-769-5p | SLC35F3   | 0.78  |
| hsa-mir-769-5p | SLC6A15   | 0.73  |
| hsa-mir-769-5p | SLC7A14   | 0.58  |
| hsa-mir-769-5p | SLC7A4    | 0.82  |
| hsa-mir-769-5p | SLIT2     | 0.56  |
| hsa-mir-769-5p | SLITRK1   | 0.68  |
| hsa-mir-769-5p | SLITRK4   | 0.74  |
| hsa-mir-769-5p | SNAP91    | 0.77  |
| hsa-mir-769-5p | SNCA      | 0.78  |

|                |          |       |
|----------------|----------|-------|
| hsa-mir-769-5p | SNIP     | 0.66  |
| hsa-mir-769-5p | SORCS1   | 0.61  |
| hsa-mir-769-5p | SSTR1    | 0.73  |
| hsa-mir-769-5p | STXBP1   | 0.81  |
| hsa-mir-769-5p | STXBP5L  | 0.69  |
| hsa-mir-769-5p | SULT4A1  | 0.81  |
| hsa-mir-769-5p | SUSD5    | 0.73  |
| hsa-mir-769-5p | SV2B     | 0.69  |
| hsa-mir-769-5p | SYCE1    | 0.79  |
| hsa-mir-769-5p | SYN2     | 0.77  |
| hsa-mir-769-5p | SYN3     | 0.65  |
| hsa-mir-769-5p | SYNGR3   | 0.79  |
| hsa-mir-769-5p | SYT13    | 0.71  |
| hsa-mir-769-5p | TACSTD1  | 0.72  |
| hsa-mir-769-5p | TBR1     | 0.79  |
| hsa-mir-769-5p | TCERG1L  | 0.80  |
| hsa-mir-769-5p | THRB     | 0.68  |
| hsa-mir-769-5p | TMCC2    | 0.65  |
| hsa-mir-769-5p | TMEM16C  | 0.76  |
| hsa-mir-769-5p | TMEM24   | 0.69  |
| hsa-mir-769-5p | TNNT2    | 0.77  |
| hsa-mir-769-5p | UNC13A   | 0.67  |
| hsa-mir-769-5p | WDR35    | -0.65 |
| hsa-mir-769-5p | WDR77    | -0.57 |
| hsa-mir-769-5p | WNT10B   | 0.82  |
| hsa-mir-769-5p | WSCD2    | 0.76  |
| hsa-mir-769-5p | YPEL4    | 0.72  |
| hsa-mir-769-5p | ZNF609   | 0.61  |
| hsa-mir-770-5p | FKBP15   | -0.40 |
| hsa-mir-770-5p | KCTD3    | -0.61 |
| hsa-mir-801    | CRISP1   | -0.47 |
| hsa-mir-801    | FLJ22222 | -0.43 |
| hsa-mir-9      | AMPH     | -0.60 |
| hsa-mir-9      | B4GALT6  | -0.56 |
| hsa-mir-9      | BUB1     | 0.50  |
| hsa-mir-9      | CDCA4    | 0.52  |
| hsa-mir-9      | CENPH    | 0.57  |
| hsa-mir-9      | CIT      | -0.41 |
| hsa-mir-9      | DEPDC1   | 0.44  |
| hsa-mir-9      | HIST1H4H | 0.37  |
| hsa-mir-9      | KIF18A   | 0.50  |
| hsa-mir-9      | KIF5A    | -0.59 |
| hsa-mir-9      | MAD2L1   | 0.45  |
| hsa-mir-9      | MYO5A    | -0.65 |
| hsa-mir-9      | RFC4     | 0.58  |
| hsa-mir-9      | RIMS2    | -0.57 |
| hsa-mir-9      | RIPK5    | -0.52 |
| hsa-mir-9      | SCN2A    | -0.59 |
| hsa-mir-9      | SV2C     | -0.54 |
| hsa-mir-9      | SYNE1    | -0.60 |
| hsa-mir-9      | TGFA     | -0.48 |
| hsa-mir-9      | TMEFF2   | -0.53 |
| hsa-mir-9      | TTK      | 0.51  |
| hsa-mir-9*     | ASL      | 0.38  |
| hsa-mir-9*     | C12orf51 | -0.53 |
| hsa-mir-9*     | CPNE5    | -0.70 |



|             |           |       |
|-------------|-----------|-------|
| hsa-mir-9*  | FAM126B   | -0.63 |
| hsa-mir-9*  | JPH3      | -0.47 |
| hsa-mir-9*  | KCTD16    | -0.65 |
| hsa-mir-9*  | KIAA1107  | -0.56 |
| hsa-mir-9*  | LOC136242 | -0.56 |
| hsa-mir-9*  | MYO5A     | -0.68 |
| hsa-mir-9*  | PRPS1L1   | 0.56  |
| hsa-mir-9*  | RIPK5     | -0.58 |
| hsa-mir-9*  | SCN2A     | -0.67 |
| hsa-mir-9*  | SHANK3    | -0.56 |
| hsa-mir-9*  | SYNE1     | -0.68 |
| hsa-mir-9*  | TMCO1     | 0.41  |
| hsa-mir-92  | DPPA4     | 0.46  |
| hsa-mir-92  | USP51     | -0.57 |
| hsa-mir-92b | C16orf65  | -0.44 |
| hsa-mir-92b | C7orf10   | 0.61  |
| hsa-mir-92b | CHN2      | -0.51 |
| hsa-mir-92b | CIDEA     | -0.67 |
| hsa-mir-92b | DYSF      | -0.68 |
| hsa-mir-92b | EXOC8     | -0.47 |
| hsa-mir-92b | GABARAPL3 | -0.63 |
| hsa-mir-92b | GNG12     | 0.58  |
| hsa-mir-92b | KCNAB1    | -0.45 |
| hsa-mir-92b | KIAA1183  | -0.42 |
| hsa-mir-92b | MGC39606  | -0.60 |
| hsa-mir-92b | PAIP2B    | -0.69 |
| hsa-mir-92b | PELI3     | -0.66 |
| hsa-mir-92b | PLCL1     | -0.62 |
| hsa-mir-92b | PRKACB    | -0.45 |
| hsa-mir-92b | RUFY2     | -0.55 |
| hsa-mir-92b | SLC22A15  | -0.53 |
| hsa-mir-92b | STX3      | -0.58 |
| hsa-mir-92b | TTLL7     | -0.51 |
| hsa-mir-92b | UBQLN2    | -0.55 |
| hsa-mir-92b | USP31     | -0.59 |
| hsa-mir-92b | ZNF540    | -0.48 |
| hsa-mir-92b | ZNF57     | -0.40 |
| hsa-mir-93  | ABLIM2    | -0.65 |
| hsa-mir-93  | ACCN1     | -0.73 |
| hsa-mir-93  | AK5       | -0.62 |
| hsa-mir-93  | AMPH      | -0.64 |
| hsa-mir-93  | APBB1     | -0.60 |
| hsa-mir-93  | APLP1     | -0.72 |
| hsa-mir-93  | ATP2B3    | -0.68 |
| hsa-mir-93  | BIN1      | -0.68 |
| hsa-mir-93  | BRUNOL4   | -0.63 |
| hsa-mir-93  | C12orf53  | -0.57 |
| hsa-mir-93  | C20orf174 | -0.60 |
| hsa-mir-93  | C9orf4    | -0.58 |
| hsa-mir-93  | CA11      | -0.68 |
| hsa-mir-93  | CALN1     | -0.67 |
| hsa-mir-93  | CAMK2A    | -0.66 |
| hsa-mir-93  | CDH23     | -0.61 |
| hsa-mir-93  | CHGA      | -0.66 |
| hsa-mir-93  | CPLX1     | -0.61 |
| hsa-mir-93  | D15Wsu75e | -0.51 |

|             |          |       |
|-------------|----------|-------|
| hsa-mir-93  | DBC1     | -0.68 |
| hsa-mir-93  | DLG2     | -0.66 |
| hsa-mir-93  | DNAJA4   | -0.65 |
| hsa-mir-93  | DOC2A    | -0.67 |
| hsa-mir-93  | DPEP3    | -0.59 |
| hsa-mir-93  | EFHA2    | -0.59 |
| hsa-mir-93  | EHD3     | -0.67 |
| hsa-mir-93  | ERC2     | -0.59 |
| hsa-mir-93  | F2R      | 0.65  |
| hsa-mir-93  | FAIM2    | -0.65 |
| hsa-mir-93  | FBXL16   | -0.60 |
| hsa-mir-93  | GHRL     | -0.59 |
| hsa-mir-93  | GNG7     | -0.67 |
| hsa-mir-93  | GPR162   | -0.62 |
| hsa-mir-93  | KCNC3    | -0.59 |
| hsa-mir-93  | KCNK1    | -0.69 |
| hsa-mir-93  | KIF5A    | -0.66 |
| hsa-mir-93  | LY6H     | -0.65 |
| hsa-mir-93  | MYO5A    | -0.56 |
| hsa-mir-93  | NALCN    | -0.66 |
| hsa-mir-93  | NEFH     | -0.63 |
| hsa-mir-93  | NEFM     | -0.66 |
| hsa-mir-93  | NEUROD2  | -0.65 |
| hsa-mir-93  | NRGN     | -0.53 |
| hsa-mir-93  | PEG3     | -0.58 |
| hsa-mir-93  | PSD      | -0.70 |
| hsa-mir-93  | PUS7     | 0.66  |
| hsa-mir-93  | RBM11    | -0.67 |
| hsa-mir-93  | RGS3     | 0.59  |
| hsa-mir-93  | RHBDL2   | -0.66 |
| hsa-mir-93  | RIMS2    | -0.74 |
| hsa-mir-93  | RSPO2    | -0.64 |
| hsa-mir-93  | SCN8A    | -0.67 |
| hsa-mir-93  | SLC17A7  | -0.67 |
| hsa-mir-93  | SLC1A2   | -0.67 |
| hsa-mir-93  | SLC7A10  | -0.64 |
| hsa-mir-93  | SYN2     | -0.72 |
| hsa-mir-93  | SYP      | -0.64 |
| hsa-mir-93  | SYT1     | -0.60 |
| hsa-mir-93  | TMEFF2   | -0.56 |
| hsa-mir-93  | TMEM10   | -0.61 |
| hsa-mir-93  | TMEM151  | -0.67 |
| hsa-mir-93  | TNRC4    | -0.63 |
| hsa-mir-93  | UGT8     | -0.62 |
| hsa-mir-93  | VPS37B   | 0.70  |
| hsa-mir-93  | ZNF365   | -0.73 |
| hsa-mir-96  | ANKRD11  | -0.58 |
| hsa-mir-96  | C7orf55  | 0.46  |
| hsa-mir-96  | CD80     | 0.65  |
| hsa-mir-96  | FLJ32549 | 0.47  |
| hsa-mir-96  | MLL5     | -0.75 |
| hsa-mir-96  | NDUFA9   | 0.63  |
| hsa-mir-96  | TMEM62   | 0.60  |
| hsa-mir-96  | ZNF35    | 0.56  |
| hsa-mir-98  | C9orf43  | 0.53  |
| hsa-mir-99a | ANKRD43  | -0.61 |

|             |           |       |
|-------------|-----------|-------|
| hsa-mir-99a | ARHGAP20  | -0.60 |
| hsa-mir-99a | B3GNT2    | -0.47 |
| hsa-mir-99a | C1orf125  | 0.65  |
| hsa-mir-99a | C4orf32   | -0.65 |
| hsa-mir-99a | CCDC67    | -0.57 |
| hsa-mir-99a | CLMN      | -0.64 |
| hsa-mir-99a | EDG2      | -0.72 |
| hsa-mir-99a | ENPP2     | -0.58 |
| hsa-mir-99a | EVI2A     | -0.69 |
| hsa-mir-99a | FAM19A2   | -0.46 |
| hsa-mir-99a | GNA14     | -0.56 |
| hsa-mir-99a | GUCY1A3   | -0.59 |
| hsa-mir-99a | IFIT1     | -0.39 |
| hsa-mir-99a | KIRREL3   | -0.51 |
| hsa-mir-99a | LILRA4    | -0.50 |
| hsa-mir-99a | LRRC3B    | -0.57 |
| hsa-mir-99a | OBSL1     | 0.62  |
| hsa-mir-99a | PPP3R1    | -0.44 |
| hsa-mir-99a | RABGAP1L  | -0.49 |
| hsa-mir-99a | RBP7      | -0.61 |
| hsa-mir-99a | REPS2     | -0.44 |
| hsa-mir-99a | SERPINA13 | 0.57  |
| hsa-mir-99a | TLL2      | -0.58 |
| hsa-mir-99a | TMEM10    | -0.57 |
| hsa-mir-99a | TP53INP2  | -0.47 |
| hsa-mir-99a | TRIM59    | -0.74 |
| hsa-mir-99a | UNC13C    | -0.62 |
| hsa-mir-99a | UVRAG     | -0.52 |
| hsa-mir-99a | ZNF384    | 0.46  |
| hsa-mir-99a | ZNF536    | -0.48 |
| hsa-mir-99a | ZNF702    | -0.62 |
| hsa-mir-99b | FHL1      | -0.47 |
| hsa-mir-99b | MATR3     | -0.39 |

**Supplementary Table 4C. Unique Edges in Proneural Subtype**

| <b>miR</b>   | <b>gene</b> | <b>correlation</b> |
|--------------|-------------|--------------------|
| hsa-let-7b   | COL9A3      | -0.36              |
| hsa-let-7c   | EPN2        | -0.47              |
| hsa-let-7c   | HRASLS      | -0.45              |
| hsa-let-7c   | MCRS1       | -0.42              |
| hsa-let-7c   | NT5DC2      | -0.37              |
| hsa-let-7c   | SNX1        | -0.47              |
| hsa-mir-1    | GPR45       | 0.37               |
| hsa-mir-100  | BIRC5       | -0.50              |
| hsa-mir-100  | C18orf24    | -0.53              |
| hsa-mir-100  | C6orf1      | 0.47               |
| hsa-mir-100  | CCDC80      | 0.54               |
| hsa-mir-100  | CCNB2       | -0.49              |
| hsa-mir-100  | CDC2        | -0.44              |
| hsa-mir-100  | CDCA2       | -0.54              |
| hsa-mir-100  | CENPL       | -0.47              |
| hsa-mir-100  | DEPDC1      | -0.39              |
| hsa-mir-100  | FANCD2      | -0.50              |
| hsa-mir-100  | ITPKB       | 0.58               |
| hsa-mir-100  | KIF20A      | -0.49              |
| hsa-mir-100  | MCC         | 0.41               |
| hsa-mir-100  | MGC13057    | 0.63               |
| hsa-mir-100  | MKI67       | -0.44              |
| hsa-mir-100  | MXD3        | -0.43              |
| hsa-mir-100  | NCAPD2      | -0.52              |
| hsa-mir-100  | ODZ4        | 0.47               |
| hsa-mir-100  | PIF1        | -0.46              |
| hsa-mir-100  | PLK1        | -0.64              |
| hsa-mir-100  | PPP1R3C     | 0.52               |
| hsa-mir-100  | PTTG3       | -0.45              |
| hsa-mir-100  | SLC8A1      | 0.60               |
| hsa-mir-100  | SLCO4A1     | -0.60              |
| hsa-mir-100  | TIPARP      | 0.53               |
| hsa-mir-100  | TTC35       | 0.40               |
| hsa-mir-100  | WNT7A       | 0.50               |
| hsa-mir-101  | BTN2A3      | 0.41               |
| hsa-mir-106a | AGT         | -0.62              |
| hsa-mir-106a | B3GNT5      | -0.30              |
| hsa-mir-106a | BAG3        | -0.50              |
| hsa-mir-106a | BCAR3       | -0.52              |
| hsa-mir-106a | BHLHB3      | -0.50              |
| hsa-mir-106a | C11orf63    | -0.42              |
| hsa-mir-106a | CCDC65      | -0.49              |
| hsa-mir-106a | CCDC89      | -0.40              |
| hsa-mir-106a | CCDC96      | -0.49              |
| hsa-mir-106a | CHPT1       | -0.51              |
| hsa-mir-106a | DDR1        | -0.54              |
| hsa-mir-106a | FADS2       | -0.47              |
| hsa-mir-106a | FLJ22167    | -0.50              |
| hsa-mir-106a | FLJ46266    | -0.47              |
| hsa-mir-106a | FSD1        | 0.47               |
| hsa-mir-106a | GDPD2       | -0.45              |
| hsa-mir-106a | GJA1        | -0.46              |
| hsa-mir-106a | IQCK        | -0.63              |

|              |              |       |
|--------------|--------------|-------|
| hsa-mir-106a | ITGA6        | -0.58 |
| hsa-mir-106a | PON2         | -0.55 |
| hsa-mir-106a | PPAP2B       | -0.58 |
| hsa-mir-106a | RGS6         | -0.48 |
| hsa-mir-106a | RHPN2        | -0.44 |
| hsa-mir-106a | RSPH1        | -0.45 |
| hsa-mir-106a | SCRN1        | -0.51 |
| hsa-mir-106a | SDCBP        | -0.55 |
| hsa-mir-106a | SLC44A3      | -0.54 |
| hsa-mir-106a | TAX1BP1      | -0.56 |
| hsa-mir-106a | TEGT         | -0.52 |
| hsa-mir-106a | TSNAXIP1     | -0.40 |
| hsa-mir-106a | UCK2         | 0.56  |
| hsa-mir-106a | UNQ501       | -0.61 |
| hsa-mir-106b | CALR         | -0.41 |
| hsa-mir-106b | EDNRB        | -0.45 |
| hsa-mir-106b | GUSBL1       | 0.42  |
| hsa-mir-106b | LOC100049076 | 0.37  |
| hsa-mir-10b  | CTSL2        | 0.32  |
| hsa-mir-10b  | LHX2         | 0.45  |
| hsa-mir-10b  | TKTL1        | -0.20 |
| hsa-mir-124a | ACBD5        | -0.37 |
| hsa-mir-124a | CCDC112      | 0.40  |
| hsa-mir-124a | HUS1         | 0.16  |
| hsa-mir-125a | ACAN         | -0.33 |
| hsa-mir-125b | KAL1         | 0.56  |
| hsa-mir-126* | C10orf79     | -0.51 |
| hsa-mir-128b | BRWD3        | 0.32  |
| hsa-mir-128b | VCAN         | 0.35  |
| hsa-mir-130a | DPP10        | 0.35  |
| hsa-mir-130b | ADCY7        | -0.53 |
| hsa-mir-130b | ALOX5AP      | -0.53 |
| hsa-mir-130b | AMH          | 0.40  |
| hsa-mir-130b | BCL2A1       | -0.34 |
| hsa-mir-130b | BLNK         | -0.55 |
| hsa-mir-130b | BTK          | -0.52 |
| hsa-mir-130b | C15orf48     | -0.30 |
| hsa-mir-130b | C1orf162     | -0.59 |
| hsa-mir-130b | C1orf38      | -0.60 |
| hsa-mir-130b | C8orf4       | -0.35 |
| hsa-mir-130b | CARD6        | -0.55 |
| hsa-mir-130b | CASP10       | -0.46 |
| hsa-mir-130b | CD33         | -0.57 |
| hsa-mir-130b | CD44         | -0.47 |
| hsa-mir-130b | CD69         | -0.42 |
| hsa-mir-130b | CDO1         | -0.50 |
| hsa-mir-130b | CHST9        | -0.43 |
| hsa-mir-130b | CTNND2       | -0.62 |
| hsa-mir-130b | CX3CR1       | -0.54 |
| hsa-mir-130b | CXorf9       | -0.53 |
| hsa-mir-130b | DDEF11       | -0.52 |
| hsa-mir-130b | DEF6         | -0.58 |
| hsa-mir-130b | FCGBP        | -0.57 |
| hsa-mir-130b | FEN1         | 0.59  |
| hsa-mir-130b | GATM         | -0.44 |
| hsa-mir-130b | GBP2         | -0.56 |

|              |          |       |
|--------------|----------|-------|
| hsa-mir-130b | GIMAP1   | -0.58 |
| hsa-mir-130b | GLUL     | -0.61 |
| hsa-mir-130b | GNA12    | -0.54 |
| hsa-mir-130b | GPR65    | -0.46 |
| hsa-mir-130b | GTF3C3   | 0.48  |
| hsa-mir-130b | HCLS1    | -0.60 |
| hsa-mir-130b | IL10RA   | -0.62 |
| hsa-mir-130b | IL17D    | -0.55 |
| hsa-mir-130b | IL18     | -0.52 |
| hsa-mir-130b | IL1B     | -0.51 |
| hsa-mir-130b | IL8      | -0.39 |
| hsa-mir-130b | IRAK3    | -0.58 |
| hsa-mir-130b | ITGB2    | -0.59 |
| hsa-mir-130b | KCNQ1    | -0.55 |
| hsa-mir-130b | KIAA1274 | -0.54 |
| hsa-mir-130b | KIF22    | 0.66  |
| hsa-mir-130b | LAPTM5   | -0.56 |
| hsa-mir-130b | LCP1     | -0.51 |
| hsa-mir-130b | LFNG     | -0.44 |
| hsa-mir-130b | LOC51336 | 0.39  |
| hsa-mir-130b | LRP10    | -0.53 |
| hsa-mir-130b | MYB      | 0.57  |
| hsa-mir-130b | NCF1     | -0.48 |
| hsa-mir-130b | NDP      | -0.44 |
| hsa-mir-130b | NECAP2   | -0.46 |
| hsa-mir-130b | NUB1     | -0.58 |
| hsa-mir-130b | ODZ4     | -0.46 |
| hsa-mir-130b | OGFRL1   | -0.59 |
| hsa-mir-130b | OSGIN2   | -0.48 |
| hsa-mir-130b | PDE7A    | 0.51  |
| hsa-mir-130b | PDPN     | -0.34 |
| hsa-mir-130b | PMP22    | -0.46 |
| hsa-mir-130b | PPP2R5A  | -0.50 |
| hsa-mir-130b | PRKAG2   | -0.46 |
| hsa-mir-130b | RAB7L1   | -0.47 |
| hsa-mir-130b | RNASET2  | -0.55 |
| hsa-mir-130b | SLC1A3   | -0.61 |
| hsa-mir-130b | SLC44A3  | -0.55 |
| hsa-mir-130b | SRGN     | -0.51 |
| hsa-mir-130b | TAGAP    | -0.49 |
| hsa-mir-130b | TNFSF13B | -0.50 |
| hsa-mir-130b | TRAF3IP3 | -0.56 |
| hsa-mir-130b | VAV1     | -0.62 |
| hsa-mir-130b | ZWINT    | 0.72  |
| hsa-mir-134  | PDE2A    | -0.22 |
| hsa-mir-135a | BLM      | -0.39 |
| hsa-mir-135a | CCDC85A  | 0.46  |
| hsa-mir-135a | COMMD4   | -0.41 |
| hsa-mir-135a | DUSP6    | -0.55 |
| hsa-mir-135a | ISG20L1  | -0.55 |
| hsa-mir-135a | RLBP1    | -0.47 |
| hsa-mir-135a | SPRY4    | -0.60 |
| hsa-mir-135a | TMSL8    | -0.34 |
| hsa-mir-135a | UBXD8    | -0.28 |
| hsa-mir-135b | POLR2F   | -0.42 |
| hsa-mir-136  | DRD5     | -0.16 |

|                |           |       |
|----------------|-----------|-------|
| hsa-mir-138    | ALG6      | 0.46  |
| hsa-mir-138    | C12orf49  | 0.38  |
| hsa-mir-138    | C14orf128 | 0.58  |
| hsa-mir-138    | C9orf3    | 0.46  |
| hsa-mir-138    | CHRD      | -0.35 |
| hsa-mir-138    | HAR1A     | -0.38 |
| hsa-mir-138    | LOC402573 | 0.46  |
| hsa-mir-138    | MAPK11    | -0.39 |
| hsa-mir-138    | MPZL1     | 0.62  |
| hsa-mir-138    | SIRT2     | 0.67  |
| hsa-mir-138    | STAR      | -0.40 |
| hsa-mir-138    | TIMM23    | -0.36 |
| hsa-mir-138    | TMEM163   | 0.68  |
| hsa-mir-138    | TNS3      | 0.66  |
| hsa-mir-138    | TRIM17    | -0.44 |
| hsa-mir-138    | ZNF416    | 0.28  |
| hsa-mir-140    | C1orf26   | 0.37  |
| hsa-mir-140    | NDUFC2    | -0.41 |
| hsa-mir-140    | PIH1D2    | -0.28 |
| hsa-mir-140    | WWP2      | 0.72  |
| hsa-mir-142-3p | CCL2      | 0.56  |
| hsa-mir-142-3p | HLA-A     | 0.50  |
| hsa-mir-142-3p | HLA-E     | 0.56  |
| hsa-mir-142-3p | HLA-F     | 0.54  |
| hsa-mir-142-3p | LYN       | 0.55  |
| hsa-mir-142-3p | MYO1F     | 0.62  |
| hsa-mir-142-3p | NFKBIZ    | 0.46  |
| hsa-mir-142-3p | PARVG     | 0.64  |
| hsa-mir-142-3p | S100A8    | 0.58  |
| hsa-mir-142-3p | ST14      | 0.56  |
| hsa-mir-142-3p | TNFAIP3   | 0.60  |
| hsa-mir-142-3p | TNFRSF1B  | 0.65  |
| hsa-mir-142-3p | TRPM2     | 0.64  |
| hsa-mir-142-5p | ACPP      | 0.68  |
| hsa-mir-142-5p | BCL2A1    | 0.55  |
| hsa-mir-142-5p | CD74      | 0.58  |
| hsa-mir-142-5p | FES       | 0.57  |
| hsa-mir-142-5p | HAMP      | 0.62  |
| hsa-mir-142-5p | HRH1      | 0.60  |
| hsa-mir-142-5p | IFITM2    | 0.45  |
| hsa-mir-142-5p | NFKBIZ    | 0.48  |
| hsa-mir-142-5p | RCAN1     | 0.48  |
| hsa-mir-142-5p | S100A8    | 0.61  |
| hsa-mir-142-5p | S100A9    | 0.52  |
| hsa-mir-142-5p | SERPING1  | 0.57  |
| hsa-mir-142-5p | SIRT1     | -0.47 |
| hsa-mir-143    | SPRY1     | 0.51  |
| hsa-mir-144    | C15orf37  | 0.44  |
| hsa-mir-144    | FIBP      | 0.43  |
| hsa-mir-144    | IL31      | -0.37 |
| hsa-mir-146b   | ACADS     | 0.42  |
| hsa-mir-146b   | BIC       | 0.62  |
| hsa-mir-146b   | CCL2      | 0.50  |
| hsa-mir-146b   | CLCF1     | 0.53  |
| hsa-mir-146b   | HRH1      | 0.65  |
| hsa-mir-146b   | IER3      | 0.44  |

|              |             |       |
|--------------|-------------|-------|
| hsa-mir-146b | IL6         | 0.71  |
| hsa-mir-146b | LGALS3      | 0.55  |
| hsa-mir-146b | LTF         | 0.54  |
| hsa-mir-146b | MAP3K8      | 0.60  |
| hsa-mir-146b | NFE2L2      | 0.51  |
| hsa-mir-146b | NOPE        | 0.46  |
| hsa-mir-146b | PLB1        | 0.57  |
| hsa-mir-146b | PQLC3       | 0.50  |
| hsa-mir-146b | PYGL        | 0.58  |
| hsa-mir-146b | hCG_1990170 | 0.59  |
| hsa-mir-148a | BEX5        | 0.50  |
| hsa-mir-148a | C1orf173    | 0.58  |
| hsa-mir-148a | CXCL14      | 0.47  |
| hsa-mir-148a | FABP5       | 0.47  |
| hsa-mir-148a | GAL3ST3     | -0.38 |
| hsa-mir-148a | LGALS3      | 0.44  |
| hsa-mir-148a | LGALS8      | 0.45  |
| hsa-mir-148a | LOC150223   | 0.48  |
| hsa-mir-148a | NME4        | -0.50 |
| hsa-mir-148a | PEO1        | -0.53 |
| hsa-mir-148a | PPCS        | 0.50  |
| hsa-mir-148a | TRIM36      | 0.56  |
| hsa-mir-148a | ZDHHC23     | 0.50  |
| hsa-mir-148a | hCG_2033311 | -0.49 |
| hsa-mir-149  | FAM81B      | 0.39  |
| hsa-mir-151  | EEF1A2      | -0.34 |
| hsa-mir-151  | OTUD6B      | 0.50  |
| hsa-mir-152  | ANGPTL7     | 0.35  |
| hsa-mir-155  | C10orf114   | 0.39  |
| hsa-mir-155  | C21orf63    | 0.54  |
| hsa-mir-155  | C2orf39     | 0.60  |
| hsa-mir-155  | C9orf116    | 0.49  |
| hsa-mir-155  | CCDC11      | 0.46  |
| hsa-mir-155  | CFB         | 0.50  |
| hsa-mir-155  | CXCL14      | 0.46  |
| hsa-mir-155  | KIAA1257    | 0.43  |
| hsa-mir-155  | KIF9        | 0.54  |
| hsa-mir-155  | KLHDC9      | 0.44  |
| hsa-mir-155  | LRRC2       | 0.52  |
| hsa-mir-155  | LZTFL1      | 0.51  |
| hsa-mir-155  | P2RY2       | 0.36  |
| hsa-mir-155  | ROPN1L      | 0.51  |
| hsa-mir-155  | SNX10       | 0.46  |
| hsa-mir-155  | VDR         | 0.57  |
| hsa-mir-15a  | HEY2        | -0.24 |
| hsa-mir-15b  | C14orf106   | 0.51  |
| hsa-mir-15b  | CAPN1       | -0.34 |
| hsa-mir-15b  | DCLRE1A     | 0.51  |
| hsa-mir-15b  | FCGRT       | -0.53 |
| hsa-mir-15b  | HIBADH      | -0.46 |
| hsa-mir-15b  | IKBKAP      | 0.40  |
| hsa-mir-15b  | KCNT2       | 0.39  |
| hsa-mir-15b  | LHX2        | 0.42  |
| hsa-mir-15b  | MARVELD3    | -0.43 |
| hsa-mir-15b  | SMARCD3     | -0.52 |
| hsa-mir-15b  | URP2        | -0.40 |



|               |              |       |
|---------------|--------------|-------|
| hsa-mir-16    | FAM20B       | 0.45  |
| hsa-mir-16    | ID3          | -0.47 |
| hsa-mir-16    | ZNF643       | 0.43  |
| hsa-mir-17-3p | ANXA1        | -0.53 |
| hsa-mir-17-3p | ARHGDIB      | -0.50 |
| hsa-mir-17-3p | CCR2         | -0.47 |
| hsa-mir-17-3p | CGNL1        | -0.63 |
| hsa-mir-17-3p | EFEMP2       | -0.48 |
| hsa-mir-17-3p | ERP27        | -0.49 |
| hsa-mir-17-3p | FAS          | -0.46 |
| hsa-mir-17-3p | GJA1         | -0.60 |
| hsa-mir-17-3p | GTF3C3       | 0.50  |
| hsa-mir-17-3p | HCLS1        | -0.51 |
| hsa-mir-17-3p | IL18         | -0.47 |
| hsa-mir-17-3p | IL8          | -0.48 |
| hsa-mir-17-3p | IQCK         | -0.54 |
| hsa-mir-17-3p | LOC388335    | -0.43 |
| hsa-mir-17-3p | NAT2         | -0.50 |
| hsa-mir-17-3p | NPC2         | -0.48 |
| hsa-mir-17-3p | SAT1         | -0.54 |
| hsa-mir-17-3p | SDCBP        | -0.49 |
| hsa-mir-17-3p | TMEM35       | 0.43  |
| hsa-mir-17-3p | TRAF3IP3     | -0.51 |
| hsa-mir-17-5p | AGT          | -0.63 |
| hsa-mir-17-5p | ALS2CR13     | 0.59  |
| hsa-mir-17-5p | ANKRD42      | -0.49 |
| hsa-mir-17-5p | B3GNT5       | -0.34 |
| hsa-mir-17-5p | BCAR3        | -0.52 |
| hsa-mir-17-5p | BRI3         | -0.46 |
| hsa-mir-17-5p | C9orf6       | -0.45 |
| hsa-mir-17-5p | CAST         | -0.53 |
| hsa-mir-17-5p | CCDC11       | -0.44 |
| hsa-mir-17-5p | CCDC65       | -0.52 |
| hsa-mir-17-5p | CCDC96       | -0.53 |
| hsa-mir-17-5p | CDO1         | -0.48 |
| hsa-mir-17-5p | CETN2        | -0.51 |
| hsa-mir-17-5p | CHPT1        | -0.50 |
| hsa-mir-17-5p | CSTB         | -0.51 |
| hsa-mir-17-5p | DDR1         | -0.54 |
| hsa-mir-17-5p | DFNA5        | -0.53 |
| hsa-mir-17-5p | DKFZp666G057 | -0.38 |
| hsa-mir-17-5p | DYX1C1       | -0.43 |
| hsa-mir-17-5p | EBI2         | -0.36 |
| hsa-mir-17-5p | EDG3         | -0.46 |
| hsa-mir-17-5p | EFHC2        | -0.45 |
| hsa-mir-17-5p | FAM108C1     | -0.39 |
| hsa-mir-17-5p | FBXO36       | -0.37 |
| hsa-mir-17-5p | FSD1         | 0.50  |
| hsa-mir-17-5p | GCLM         | -0.45 |
| hsa-mir-17-5p | IFT57        | -0.51 |
| hsa-mir-17-5p | IL13RA1      | -0.51 |
| hsa-mir-17-5p | IQCE         | -0.45 |
| hsa-mir-17-5p | IQCK         | -0.66 |
| hsa-mir-17-5p | ITGA6        | -0.56 |
| hsa-mir-17-5p | ITGB8        | -0.56 |
| hsa-mir-17-5p | LOC51336     | 0.38  |

|               |          |       |
|---------------|----------|-------|
| hsa-mir-17-5p | LRRC48   | -0.42 |
| hsa-mir-17-5p | PAM      | -0.40 |
| hsa-mir-17-5p | PON2     | -0.56 |
| hsa-mir-17-5p | RGS6     | -0.49 |
| hsa-mir-17-5p | RUNX1    | -0.42 |
| hsa-mir-17-5p | SBDS     | -0.44 |
| hsa-mir-17-5p | SDCBP    | -0.57 |
| hsa-mir-17-5p | SLC44A3  | -0.56 |
| hsa-mir-17-5p | SOX9     | -0.42 |
| hsa-mir-17-5p | TAX1BP1  | -0.59 |
| hsa-mir-17-5p | TNFRSF1A | -0.50 |
| hsa-mir-17-5p | TRIM6    | -0.48 |
| hsa-mir-17-5p | TTC30A   | -0.48 |
| hsa-mir-17-5p | TTC30B   | -0.40 |
| hsa-mir-17-5p | UCK2     | 0.54  |
| hsa-mir-17-5p | VIM      | -0.42 |
| hsa-mir-17-5p | WDR78    | -0.48 |
| hsa-mir-181a* | ANXA1    | -0.40 |
| hsa-mir-181a* | C10orf79 | -0.32 |
| hsa-mir-181a* | HOXA3    | -0.47 |
| hsa-mir-181a* | HOXA4    | -0.44 |
| hsa-mir-181a* | HOXA5    | -0.40 |
| hsa-mir-181a* | IMPA2    | -0.41 |
| hsa-mir-181a* | PRKAG2   | -0.38 |
| hsa-mir-181a* | RHCE     | -0.39 |
| hsa-mir-181a* | RIBC1    | -0.45 |
| hsa-mir-181a* | SCGB1D1  | -0.41 |
| hsa-mir-181a* | SCGB1D2  | -0.36 |
| hsa-mir-181a* | SKAP2    | -0.54 |
| hsa-mir-181a* | SLCO1C1  | -0.34 |
| hsa-mir-181a* | THEM2    | -0.45 |
| hsa-mir-181a* | TMEM47   | -0.48 |
| hsa-mir-181a* | TRAF4    | 0.46  |
| hsa-mir-181a* | ZBTB9    | 0.48  |
| hsa-mir-181b  | KCNK10   | -0.38 |
| hsa-mir-181c  | RPL34    | 0.34  |
| hsa-mir-182   | 4-Mar    | 0.33  |
| hsa-mir-182   | GBP2     | -0.40 |
| hsa-mir-182   | GFOD1    | 0.28  |
| hsa-mir-182   | GPR177   | -0.46 |
| hsa-mir-182   | MATN2    | -0.47 |
| hsa-mir-182   | MED29    | -0.48 |
| hsa-mir-182   | NECAP2   | -0.43 |
| hsa-mir-182   | P2RX4    | -0.43 |
| hsa-mir-182   | PDPN     | -0.25 |
| hsa-mir-182   | PFKFB3   | -0.30 |
| hsa-mir-182   | PPP2R5E  | 0.39  |
| hsa-mir-182   | RIMS2    | 0.37  |
| hsa-mir-182   | SLC24A6  | -0.42 |
| hsa-mir-182   | TNRC4    | 0.36  |
| hsa-mir-182   | UST      | -0.50 |
| hsa-mir-183   | BCL11B   | 0.46  |
| hsa-mir-183   | NECAP2   | -0.41 |
| hsa-mir-183   | PDPN     | -0.22 |
| hsa-mir-183   | RIMS2    | 0.37  |
| hsa-mir-183   | UST      | -0.47 |

|              |           |       |
|--------------|-----------|-------|
| hsa-mir-185  | RNF150    | -0.37 |
| hsa-mir-186  | AMY2B     | 0.45  |
| hsa-mir-186  | C2orf3    | 0.45  |
| hsa-mir-188  | SPA17     | 0.28  |
| hsa-mir-18a  | AGT       | -0.61 |
| hsa-mir-18a  | ATP1A1    | -0.56 |
| hsa-mir-18a  | CDO1      | -0.42 |
| hsa-mir-18a  | CLUAP1    | -0.56 |
| hsa-mir-18a  | CTPS      | 0.62  |
| hsa-mir-18a  | DKK3      | -0.60 |
| hsa-mir-18a  | FGF2      | -0.62 |
| hsa-mir-18a  | FLJ22167  | -0.55 |
| hsa-mir-18a  | FZD7      | -0.38 |
| hsa-mir-18a  | GJA1      | -0.44 |
| hsa-mir-18a  | HIVEP2    | -0.58 |
| hsa-mir-18a  | ITGA6     | -0.56 |
| hsa-mir-18a  | LOC492311 | -0.53 |
| hsa-mir-18a  | MARVELD3  | -0.38 |
| hsa-mir-18a  | MAST4     | -0.62 |
| hsa-mir-18a  | MGC7036   | -0.57 |
| hsa-mir-18a  | NFE2L1    | -0.53 |
| hsa-mir-18a  | PAM       | -0.51 |
| hsa-mir-18a  | PCSK5     | -0.47 |
| hsa-mir-18a  | PRNP      | -0.59 |
| hsa-mir-18a  | SERPINB9  | -0.37 |
| hsa-mir-18a  | SIDT1     | -0.50 |
| hsa-mir-18a  | SIDT2     | -0.60 |
| hsa-mir-18a  | ST5       | -0.58 |
| hsa-mir-18a  | TRAF3IP3  | -0.41 |
| hsa-mir-18a  | UCK2      | 0.54  |
| hsa-mir-18a  | ZBTB4     | -0.66 |
| hsa-mir-18b  | KCNK2     | 0.40  |
| hsa-mir-191  | MXD1      | 0.48  |
| hsa-mir-191  | SMAD1     | 0.42  |
| hsa-mir-193a | CBR1      | 0.45  |
| hsa-mir-193a | GBP1      | 0.48  |
| hsa-mir-193a | HAPLN4    | 0.48  |
| hsa-mir-193a | HRASLS3   | 0.41  |
| hsa-mir-193a | KLRC3     | -0.42 |
| hsa-mir-193a | PLAU      | 0.39  |
| hsa-mir-193a | RGN       | 0.47  |
| hsa-mir-193a | SORT1     | 0.45  |
| hsa-mir-193b | MCRS1     | -0.51 |
| hsa-mir-193b | NOB1      | -0.47 |
| hsa-mir-193b | PFN1      | -0.43 |
| hsa-mir-193b | PSMC4     | -0.49 |
| hsa-mir-193b | TMEM71    | 0.40  |
| hsa-mir-193b | TMEM74    | 0.45  |
| hsa-mir-195  | ACAN      | -0.38 |
| hsa-mir-195  | ARSE      | -0.39 |
| hsa-mir-195  | C18orf17  | -0.45 |
| hsa-mir-195  | C5orf25   | -0.39 |
| hsa-mir-195  | C6orf54   | -0.40 |
| hsa-mir-195  | FAM133A   | 0.37  |
| hsa-mir-195  | HILS1     | -0.55 |
| hsa-mir-195  | HRASLS    | -0.40 |

|               |          |       |
|---------------|----------|-------|
| hsa-mir-195   | MCAM     | -0.50 |
| hsa-mir-195   | MMP9     | -0.43 |
| hsa-mir-195   | PLAT     | -0.54 |
| hsa-mir-195   | PUSL1    | -0.32 |
| hsa-mir-195   | SPRY4    | -0.51 |
| hsa-mir-195   | TRAF4    | -0.53 |
| hsa-mir-196b  | ACTA1    | 0.40  |
| hsa-mir-198   | COL23A1  | 0.41  |
| hsa-mir-198   | SNAPC5   | 0.31  |
| hsa-mir-199a* | B4GALT6  | 0.41  |
| hsa-mir-199b  | B4GALT6  | 0.56  |
| hsa-mir-199b  | DBNDD1   | 0.45  |
| hsa-mir-199b  | KAL1     | -0.44 |
| hsa-mir-199b  | NFKBIA   | -0.56 |
| hsa-mir-199b  | PPAT     | 0.39  |
| hsa-mir-199b  | SPRY1    | 0.44  |
| hsa-mir-199b  | ZHX1     | -0.50 |
| hsa-mir-19a   | AGPAT2   | -0.42 |
| hsa-mir-19a   | ALDH1A1  | -0.60 |
| hsa-mir-19a   | ALDH7A1  | -0.45 |
| hsa-mir-19a   | ALOX5    | -0.52 |
| hsa-mir-19a   | ALPK1    | -0.48 |
| hsa-mir-19a   | AMAC1L2  | 0.47  |
| hsa-mir-19a   | ANXA1    | -0.57 |
| hsa-mir-19a   | ANXA4    | -0.54 |
| hsa-mir-19a   | ARHGDI3  | -0.48 |
| hsa-mir-19a   | ARMC2    | -0.55 |
| hsa-mir-19a   | BLNK     | -0.53 |
| hsa-mir-19a   | C11orf45 | -0.52 |
| hsa-mir-19a   | C11orf63 | -0.46 |
| hsa-mir-19a   | C15orf26 | -0.41 |
| hsa-mir-19a   | C21orf13 | -0.42 |
| hsa-mir-19a   | C8orf34  | -0.51 |
| hsa-mir-19a   | C9orf98  | -0.46 |
| hsa-mir-19a   | CASP10   | -0.53 |
| hsa-mir-19a   | CCDC65   | -0.45 |
| hsa-mir-19a   | CD33     | -0.50 |
| hsa-mir-19a   | CDO1     | -0.52 |
| hsa-mir-19a   | CETN2    | -0.52 |
| hsa-mir-19a   | CFI      | -0.52 |
| hsa-mir-19a   | CGNL1    | -0.54 |
| hsa-mir-19a   | CHPT1    | -0.49 |
| hsa-mir-19a   | COLEC12  | -0.48 |
| hsa-mir-19a   | CX3CR1   | -0.51 |
| hsa-mir-19a   | CXCR4    | -0.48 |
| hsa-mir-19a   | DOT1L    | 0.57  |
| hsa-mir-19a   | EDG3     | -0.53 |
| hsa-mir-19a   | ENTPD2   | -0.61 |
| hsa-mir-19a   | ERP27    | -0.46 |
| hsa-mir-19a   | FANK1    | -0.48 |
| hsa-mir-19a   | FBXO36   | -0.51 |
| hsa-mir-19a   | FLJ22167 | -0.54 |
| hsa-mir-19a   | FSD1     | 0.56  |
| hsa-mir-19a   | FZD7     | -0.54 |
| hsa-mir-19a   | GJA1     | -0.60 |
| hsa-mir-19a   | HDGF     | 0.45  |

|             |          |       |
|-------------|----------|-------|
| hsa-mir-19a | HPR      | -0.54 |
| hsa-mir-19a | ICAM2    | -0.55 |
| hsa-mir-19a | IL18     | -0.56 |
| hsa-mir-19a | ISG20L2  | 0.44  |
| hsa-mir-19a | ITGA6    | -0.60 |
| hsa-mir-19a | ITGBL1   | -0.44 |
| hsa-mir-19a | KYNU     | -0.50 |
| hsa-mir-19a | LRRC48   | -0.47 |
| hsa-mir-19a | LTBP1    | -0.39 |
| hsa-mir-19a | MAOA     | -0.50 |
| hsa-mir-19a | MARVELD2 | -0.53 |
| hsa-mir-19a | MAST4    | -0.46 |
| hsa-mir-19a | MDFIC    | -0.41 |
| hsa-mir-19a | MGC7036  | -0.53 |
| hsa-mir-19a | NAT2     | -0.52 |
| hsa-mir-19a | NFATC2IP | 0.50  |
| hsa-mir-19a | NPL      | -0.51 |
| hsa-mir-19a | OPLAH    | -0.46 |
| hsa-mir-19a | PAQR8    | -0.55 |
| hsa-mir-19a | PHC2     | 0.36  |
| hsa-mir-19a | PNMT     | -0.59 |
| hsa-mir-19a | PON2     | -0.62 |
| hsa-mir-19a | RAB36    | -0.43 |
| hsa-mir-19a | RAC1     | -0.45 |
| hsa-mir-19a | REEP5    | -0.55 |
| hsa-mir-19a | RNF141   | -0.57 |
| hsa-mir-19a | SERPINB1 | -0.51 |
| hsa-mir-19a | SIDT1    | -0.58 |
| hsa-mir-19a | STOM     | -0.61 |
| hsa-mir-19a | TAX1BP1  | -0.53 |
| hsa-mir-19a | TGFBR2   | -0.47 |
| hsa-mir-19a | TPD52L1  | -0.52 |
| hsa-mir-19a | TRAF3IP3 | -0.60 |
| hsa-mir-19a | TTC29    | -0.45 |
| hsa-mir-19a | UBQLNL   | -0.38 |
| hsa-mir-19a | VAV1     | -0.53 |
| hsa-mir-19a | WDR63    | -0.39 |
| hsa-mir-19a | WFS1     | -0.49 |
| hsa-mir-19a | ZIC5     | -0.44 |
| hsa-mir-19a | ZNF704   | 0.56  |
| hsa-mir-19b | ALDH1A1  | -0.57 |
| hsa-mir-19b | ALOX5    | -0.56 |
| hsa-mir-19b | ALPK1    | -0.50 |
| hsa-mir-19b | AMZ2     | -0.46 |
| hsa-mir-19b | ANXA1    | -0.61 |
| hsa-mir-19b | ANXA4    | -0.59 |
| hsa-mir-19b | ARHGAP15 | -0.53 |
| hsa-mir-19b | ARMC2    | -0.58 |
| hsa-mir-19b | B3GALT4  | -0.50 |
| hsa-mir-19b | BATF     | -0.42 |
| hsa-mir-19b | C11orf45 | -0.52 |
| hsa-mir-19b | C19orf43 | 0.48  |
| hsa-mir-19b | C21orf13 | -0.47 |
| hsa-mir-19b | C8orf34  | -0.55 |
| hsa-mir-19b | C9orf116 | -0.50 |
| hsa-mir-19b | C9orf98  | -0.50 |

|             |           |       |
|-------------|-----------|-------|
| hsa-mir-19b | CARD6     | -0.47 |
| hsa-mir-19b | CCDC65    | -0.48 |
| hsa-mir-19b | CCDC96    | -0.44 |
| hsa-mir-19b | CCR2      | -0.43 |
| hsa-mir-19b | CD302     | -0.53 |
| hsa-mir-19b | CDO1      | -0.53 |
| hsa-mir-19b | CETN2     | -0.53 |
| hsa-mir-19b | CFI       | -0.56 |
| hsa-mir-19b | CHPT1     | -0.53 |
| hsa-mir-19b | CREBL2    | -0.54 |
| hsa-mir-19b | CROT      | -0.44 |
| hsa-mir-19b | CXCR4     | -0.46 |
| hsa-mir-19b | CYBRD1    | -0.52 |
| hsa-mir-19b | DCDC2     | -0.56 |
| hsa-mir-19b | DNAJB9    | -0.52 |
| hsa-mir-19b | EBI2      | -0.41 |
| hsa-mir-19b | EDG3      | -0.54 |
| hsa-mir-19b | ENTPD2    | -0.62 |
| hsa-mir-19b | ERP27     | -0.47 |
| hsa-mir-19b | FAM113B   | -0.49 |
| hsa-mir-19b | FANK1     | -0.51 |
| hsa-mir-19b | FBXL10    | 0.59  |
| hsa-mir-19b | FES       | -0.48 |
| hsa-mir-19b | FLJ22167  | -0.53 |
| hsa-mir-19b | FLJ22374  | -0.44 |
| hsa-mir-19b | FLNC      | -0.43 |
| hsa-mir-19b | FSD1      | 0.53  |
| hsa-mir-19b | FZD7      | -0.52 |
| hsa-mir-19b | GGCX      | -0.49 |
| hsa-mir-19b | GIMAP2    | -0.53 |
| hsa-mir-19b | HCLS1     | -0.49 |
| hsa-mir-19b | HPR       | -0.50 |
| hsa-mir-19b | HSDL2     | -0.46 |
| hsa-mir-19b | IL13RA1   | -0.55 |
| hsa-mir-19b | IL18      | -0.58 |
| hsa-mir-19b | ISG20L2   | 0.45  |
| hsa-mir-19b | ITGA6     | -0.61 |
| hsa-mir-19b | KIAA0460  | 0.39  |
| hsa-mir-19b | LAMP2     | -0.50 |
| hsa-mir-19b | LOC388335 | -0.47 |
| hsa-mir-19b | LRRC48    | -0.50 |
| hsa-mir-19b | MDFIC     | -0.40 |
| hsa-mir-19b | MFSD1     | -0.53 |
| hsa-mir-19b | MGC7036   | -0.56 |
| hsa-mir-19b | MGST2     | -0.58 |
| hsa-mir-19b | NAT2      | -0.54 |
| hsa-mir-19b | NDP       | -0.58 |
| hsa-mir-19b | NFATC2IP  | 0.51  |
| hsa-mir-19b | NPC2      | -0.56 |
| hsa-mir-19b | OSTF1     | -0.55 |
| hsa-mir-19b | PCNXL2    | 0.38  |
| hsa-mir-19b | PMP22     | -0.53 |
| hsa-mir-19b | PNMT      | -0.54 |
| hsa-mir-19b | PON2      | -0.64 |
| hsa-mir-19b | PRDM1     | -0.40 |
| hsa-mir-19b | PSCDBP    | -0.47 |

|               |              |       |
|---------------|--------------|-------|
| hsa-mir-19b   | PTGER4       | -0.42 |
| hsa-mir-19b   | RABL5        | -0.49 |
| hsa-mir-19b   | S100A8       | -0.48 |
| hsa-mir-19b   | S100A9       | -0.44 |
| hsa-mir-19b   | SAT1         | -0.63 |
| hsa-mir-19b   | SDCBP        | -0.53 |
| hsa-mir-19b   | SERPINB1     | -0.49 |
| hsa-mir-19b   | SIDT1        | -0.53 |
| hsa-mir-19b   | SKAP2        | -0.43 |
| hsa-mir-19b   | SLC16A4      | -0.58 |
| hsa-mir-19b   | SOAT1        | -0.50 |
| hsa-mir-19b   | SPAG1        | -0.42 |
| hsa-mir-19b   | STOM         | -0.56 |
| hsa-mir-19b   | TAX1BP1      | -0.55 |
| hsa-mir-19b   | TEKT3        | -0.52 |
| hsa-mir-19b   | TGFBR2       | -0.46 |
| hsa-mir-19b   | TMEM47       | -0.46 |
| hsa-mir-19b   | TNMD         | -0.41 |
| hsa-mir-19b   | TRAF3IP3     | -0.58 |
| hsa-mir-19b   | TTC29        | -0.47 |
| hsa-mir-19b   | UBQLNL       | -0.41 |
| hsa-mir-19b   | VAV1         | -0.52 |
| hsa-mir-19b   | WDR16        | -0.52 |
| hsa-mir-19b   | WDR63        | -0.40 |
| hsa-mir-19b   | WDR78        | -0.53 |
| hsa-mir-19b   | WFS1         | -0.51 |
| hsa-mir-19b   | ZFP36        | -0.39 |
| hsa-mir-19b   | ZNF217       | -0.42 |
| hsa-mir-200a  | NLRP13       | 0.46  |
| hsa-mir-200a* | PHIP         | -0.37 |
| hsa-mir-204   | CLSTN2       | -0.51 |
| hsa-mir-204   | GSDMDC1      | 0.51  |
| hsa-mir-206   | CCDC3        | -0.51 |
| hsa-mir-206   | TMEM16A      | -0.58 |
| hsa-mir-20a   | AGT          | -0.60 |
| hsa-mir-20a   | CCDC65       | -0.46 |
| hsa-mir-20a   | CCDC96       | -0.43 |
| hsa-mir-20a   | CHPT1        | -0.52 |
| hsa-mir-20a   | DKFZp666G057 | -0.44 |
| hsa-mir-20a   | DYX1C1       | -0.47 |
| hsa-mir-20a   | ENTPD2       | -0.55 |
| hsa-mir-20a   | FABP7        | -0.42 |
| hsa-mir-20a   | IMPACT       | -0.37 |
| hsa-mir-20a   | IQCK         | -0.64 |
| hsa-mir-20a   | ITGA6        | -0.55 |
| hsa-mir-20a   | ITGB8        | -0.53 |
| hsa-mir-20a   | PON2         | -0.56 |
| hsa-mir-20a   | PPAP2B       | -0.57 |
| hsa-mir-20a   | RGS6         | -0.50 |
| hsa-mir-20a   | RHPN2        | -0.45 |
| hsa-mir-20a   | SDCBP        | -0.54 |
| hsa-mir-20a   | SOX9         | -0.42 |
| hsa-mir-20a   | TAX1BP1      | -0.52 |
| hsa-mir-20a   | UCK2         | 0.48  |
| hsa-mir-20a   | UNQ501       | -0.58 |
| hsa-mir-20b   | AGT          | -0.63 |

|             |           |       |
|-------------|-----------|-------|
| hsa-mir-20b | ANKRD42   | -0.49 |
| hsa-mir-20b | C9orf116  | -0.50 |
| hsa-mir-20b | C9orf6    | -0.40 |
| hsa-mir-20b | CHPT1     | -0.48 |
| hsa-mir-20b | CPVL      | -0.41 |
| hsa-mir-20b | DFNA5     | -0.47 |
| hsa-mir-20b | DOK5      | -0.50 |
| hsa-mir-20b | ITGB8     | -0.47 |
| hsa-mir-20b | KIF9      | -0.46 |
| hsa-mir-20b | LRRC6     | -0.45 |
| hsa-mir-20b | NEK11     | -0.49 |
| hsa-mir-20b | PON2      | -0.48 |
| hsa-mir-20b | RBKS      | -0.54 |
| hsa-mir-20b | SLC44A3   | -0.57 |
| hsa-mir-20b | SOX9      | -0.42 |
| hsa-mir-20b | TTC30A    | -0.49 |
| hsa-mir-21  | ACADS     | 0.46  |
| hsa-mir-21  | BEST3     | -0.39 |
| hsa-mir-21  | PLB1      | 0.50  |
| hsa-mir-21  | RAB3IP    | -0.33 |
| hsa-mir-210 | 4-Mar     | 0.45  |
| hsa-mir-210 | C19orf30  | 0.47  |
| hsa-mir-210 | CACNA2D3  | 0.38  |
| hsa-mir-210 | COX5B     | 0.23  |
| hsa-mir-210 | FKBP1B    | 0.36  |
| hsa-mir-210 | SSBP2     | 0.33  |
| hsa-mir-210 | TSPAN13   | 0.37  |
| hsa-mir-212 | ZNF738    | -0.37 |
| hsa-mir-214 | B4GALT6   | 0.27  |
| hsa-mir-215 | DLL3      | -0.40 |
| hsa-mir-216 | NEUROG2   | 0.32  |
| hsa-mir-217 | MEGF11    | -0.14 |
| hsa-mir-217 | NEUROG2   | 0.31  |
| hsa-mir-219 | TEX14     | -0.37 |
| hsa-mir-22  | ALS2CR13  | -0.61 |
| hsa-mir-22  | ANXA1     | 0.62  |
| hsa-mir-22  | C3orf59   | -0.48 |
| hsa-mir-22  | CCL2      | 0.56  |
| hsa-mir-22  | CFI       | 0.54  |
| hsa-mir-22  | DHRS7B    | 0.47  |
| hsa-mir-22  | DOK5      | 0.51  |
| hsa-mir-22  | ERMAP     | 0.50  |
| hsa-mir-22  | ERP27     | 0.52  |
| hsa-mir-22  | LRRC48    | 0.47  |
| hsa-mir-22  | NEK11     | 0.57  |
| hsa-mir-22  | SLC22A4   | 0.51  |
| hsa-mir-22  | STK17A    | 0.49  |
| hsa-mir-22  | TNFRSF12A | 0.56  |
| hsa-mir-22  | TPST1     | 0.54  |
| hsa-mir-22  | WDR78     | 0.54  |
| hsa-mir-221 | C10orf30  | -0.55 |
| hsa-mir-221 | C11orf63  | 0.56  |
| hsa-mir-221 | C21orf63  | 0.55  |
| hsa-mir-221 | CAPG      | 0.40  |
| hsa-mir-221 | EDN2      | 0.35  |
| hsa-mir-221 | EPHX2     | 0.42  |



|             |          |       |
|-------------|----------|-------|
| hsa-mir-221 | FBXO17   | 0.51  |
| hsa-mir-221 | GPR158   | -0.48 |
| hsa-mir-221 | LEF1     | 0.52  |
| hsa-mir-221 | PAPD1    | -0.48 |
| hsa-mir-221 | PARG     | -0.39 |
| hsa-mir-221 | PNPLA4   | 0.51  |
| hsa-mir-221 | RARRES2  | 0.35  |
| hsa-mir-221 | S100A11  | 0.42  |
| hsa-mir-221 | SLC12A7  | 0.38  |
| hsa-mir-221 | SOST     | 0.47  |
| hsa-mir-221 | SSH3     | 0.50  |
| hsa-mir-221 | SWAP70   | 0.52  |
| hsa-mir-221 | XKR8     | 0.52  |
| hsa-mir-222 | ANXA4    | 0.50  |
| hsa-mir-222 | C21orf62 | 0.31  |
| hsa-mir-222 | C21orf63 | 0.53  |
| hsa-mir-222 | C2orf39  | 0.36  |
| hsa-mir-222 | CAPG     | 0.46  |
| hsa-mir-222 | CCL2     | 0.46  |
| hsa-mir-222 | CDH4     | 0.44  |
| hsa-mir-222 | EFEMP2   | 0.51  |
| hsa-mir-222 | EPC1     | -0.50 |
| hsa-mir-222 | FBXO17   | 0.42  |
| hsa-mir-222 | FCGR2B   | 0.44  |
| hsa-mir-222 | FLJ13195 | 0.47  |
| hsa-mir-222 | G0S2     | 0.46  |
| hsa-mir-222 | HHAT     | 0.38  |
| hsa-mir-222 | HOXB13   | 0.47  |
| hsa-mir-222 | HOXB4    | 0.54  |
| hsa-mir-222 | HOXC13   | 0.38  |
| hsa-mir-222 | IL13RA1  | 0.49  |
| hsa-mir-222 | ITGB5    | 0.45  |
| hsa-mir-222 | KCNJ8    | 0.38  |
| hsa-mir-222 | KLHDC9   | 0.46  |
| hsa-mir-222 | LEF1     | 0.60  |
| hsa-mir-222 | LOC26010 | 0.49  |
| hsa-mir-222 | MDK      | 0.48  |
| hsa-mir-222 | MGST2    | 0.52  |
| hsa-mir-222 | MOSC2    | 0.49  |
| hsa-mir-222 | MSN      | 0.50  |
| hsa-mir-222 | PAPD1    | -0.57 |
| hsa-mir-222 | PLK3     | 0.41  |
| hsa-mir-222 | PLS3     | 0.54  |
| hsa-mir-222 | RANBP17  | -0.45 |
| hsa-mir-222 | S100A11  | 0.53  |
| hsa-mir-222 | SLC12A7  | 0.51  |
| hsa-mir-222 | TBC1D10C | 0.45  |
| hsa-mir-222 | TGFBI    | 0.50  |
| hsa-mir-222 | VASN     | 0.49  |
| hsa-mir-222 | VAV3     | 0.43  |
| hsa-mir-222 | WISP1    | 0.50  |
| hsa-mir-222 | XCL2     | 0.52  |
| hsa-mir-222 | ZNF219   | -0.42 |
| hsa-mir-223 | ACPP     | 0.66  |
| hsa-mir-223 | ANKRD1   | 0.42  |
| hsa-mir-223 | BIC      | 0.56  |

|             |           |       |
|-------------|-----------|-------|
| hsa-mir-223 | DDR2      | 0.51  |
| hsa-mir-223 | IER3      | 0.60  |
| hsa-mir-223 | NMRAL1    | 0.39  |
| hsa-mir-223 | PTP4A2    | 0.40  |
| hsa-mir-223 | PTPN14    | 0.49  |
| hsa-mir-223 | S100A16   | 0.45  |
| hsa-mir-223 | TFCP2     | -0.40 |
| hsa-mir-223 | TMEM71    | 0.54  |
| hsa-mir-223 | TNFSF4    | 0.48  |
| hsa-mir-224 | LATS1     | 0.55  |
| hsa-mir-23a | DYX1C1    | 0.63  |
| hsa-mir-23a | SERPINB6  | 0.52  |
| hsa-mir-23b | CBLN1     | -0.50 |
| hsa-mir-23b | PPP1R3B   | 0.48  |
| hsa-mir-23b | SLC25A24  | 0.43  |
| hsa-mir-23b | STAR      | -0.44 |
| hsa-mir-24  | ADORA2B   | 0.46  |
| hsa-mir-24  | NMNAT3    | 0.53  |
| hsa-mir-25  | C9orf9    | -0.46 |
| hsa-mir-25  | CRAT      | -0.41 |
| hsa-mir-25  | FOXN2     | 0.37  |
| hsa-mir-25  | HIBADH    | -0.45 |
| hsa-mir-25  | IL8       | -0.52 |
| hsa-mir-25  | KLHDC9    | -0.49 |
| hsa-mir-25  | LRRC23    | -0.45 |
| hsa-mir-25  | VCAM1     | -0.34 |
| hsa-mir-26a | PKN2      | 0.41  |
| hsa-mir-26b | PID1      | 0.35  |
| hsa-mir-27a | C10orf107 | 0.44  |
| hsa-mir-27a | DYX1C1    | 0.65  |
| hsa-mir-27a | FBXO15    | 0.39  |
| hsa-mir-27a | IQCK      | 0.49  |
| hsa-mir-27a | IRF2      | 0.42  |
| hsa-mir-27a | NUDT4     | 0.48  |
| hsa-mir-27a | SPATA4    | 0.45  |
| hsa-mir-27a | TJP1      | 0.29  |
| hsa-mir-27a | TLR4      | 0.51  |
| hsa-mir-27a | TPX2      | -0.44 |
| hsa-mir-27a | ZBTB8     | -0.39 |
| hsa-mir-27b | BMPER     | 0.54  |
| hsa-mir-27b | GALC      | 0.50  |
| hsa-mir-27b | HAS2      | 0.61  |
| hsa-mir-27b | MYO7B     | 0.50  |
| hsa-mir-27b | RAB26     | -0.41 |
| hsa-mir-27b | SLC25A24  | 0.39  |
| hsa-mir-296 | CPZ       | -0.47 |
| hsa-mir-29a | ALDH6A1   | 0.49  |
| hsa-mir-29a | ARL6IP2   | -0.35 |
| hsa-mir-29a | CHI3L2    | 0.35  |
| hsa-mir-29a | HMGB2     | -0.54 |
| hsa-mir-29a | LBR       | -0.45 |
| hsa-mir-29a | LIMD2     | -0.51 |
| hsa-mir-29a | PLK1      | -0.51 |
| hsa-mir-29a | PSD2      | 0.49  |
| hsa-mir-29a | REEP2     | 0.56  |
| hsa-mir-29a | SFRS1     | -0.54 |

|                |              |       |
|----------------|--------------|-------|
| hsa-mir-29a    | TPST1        | 0.42  |
| hsa-mir-29a    | XRCC6        | -0.42 |
| hsa-mir-29a    | ZFP36L2      | 0.44  |
| hsa-mir-29b    | APOB48R      | 0.50  |
| hsa-mir-29b    | ARL6IP2      | -0.40 |
| hsa-mir-29b    | DDEF1        | 0.43  |
| hsa-mir-29b    | GFM2         | -0.51 |
| hsa-mir-29b    | SFRS7        | -0.62 |
| hsa-mir-29b    | ST5          | 0.58  |
| hsa-mir-29b    | STON1        | 0.53  |
| hsa-mir-29b    | TNFSF13B     | 0.45  |
| hsa-mir-29b    | UNQ501       | 0.51  |
| hsa-mir-29b    | ZFP36L2      | 0.47  |
| hsa-mir-301    | G0S2         | -0.29 |
| hsa-mir-301    | GUSBL1       | 0.45  |
| hsa-mir-301    | HOTAIR       | -0.43 |
| hsa-mir-301    | IL1B         | -0.24 |
| hsa-mir-301    | LOC100049076 | 0.45  |
| hsa-mir-301    | LOC653391    | 0.40  |
| hsa-mir-301    | SMA4         | 0.44  |
| hsa-mir-301    | USP43        | 0.39  |
| hsa-mir-302c*  | C11orf66     | 0.44  |
| hsa-mir-30a-5p | C1orf106     | -0.28 |
| hsa-mir-30a-5p | CCDC96       | 0.45  |
| hsa-mir-30a-5p | CNGA3        | 0.63  |
| hsa-mir-30a-5p | E2F2         | -0.51 |
| hsa-mir-30a-5p | GSG2         | -0.56 |
| hsa-mir-30a-5p | KIF14        | -0.51 |
| hsa-mir-30a-5p | NME5         | 0.47  |
| hsa-mir-30a-5p | POLG         | -0.50 |
| hsa-mir-30a-5p | PPIL6        | 0.40  |
| hsa-mir-30a-5p | REEP5        | 0.54  |
| hsa-mir-30a-5p | WDR16        | 0.41  |
| hsa-mir-30a-5p | ZNF695       | -0.46 |
| hsa-mir-30a-5p | ZWINT        | -0.54 |
| hsa-mir-30b    | HOTAIR       | -0.48 |
| hsa-mir-30c    | MSTN         | 0.53  |
| hsa-mir-30c    | RIPK2        | 0.37  |
| hsa-mir-30c    | RPRM         | 0.53  |
| hsa-mir-30c    | TRIB2        | -0.38 |
| hsa-mir-30e-3p | G0S2         | -0.38 |
| hsa-mir-30e-5p | C5orf35      | -0.52 |
| hsa-mir-30e-5p | NUDT1        | -0.44 |
| hsa-mir-31     | BAGE2        | 0.60  |
| hsa-mir-31     | C9orf11      | 0.60  |
| hsa-mir-31     | LDHB         | -0.46 |
| hsa-mir-31     | PTPN14       | 0.40  |
| hsa-mir-31     | SPATA1       | 0.63  |
| hsa-mir-324-5p | LOC198437    | -0.44 |
| hsa-mir-328    | MRPL37       | -0.46 |
| hsa-mir-33     | AIF1         | -0.49 |
| hsa-mir-33     | APOBEC3H     | -0.44 |
| hsa-mir-33     | APOC4        | -0.42 |
| hsa-mir-33     | ARHGAP9      | -0.49 |
| hsa-mir-33     | ARL11        | -0.51 |
| hsa-mir-33     | BTK          | -0.46 |

|             |           |       |
|-------------|-----------|-------|
| hsa-mir-33  | CCR1      | -0.44 |
| hsa-mir-33  | CD33      | -0.51 |
| hsa-mir-33  | CENTA2    | -0.52 |
| hsa-mir-33  | DENND1C   | -0.49 |
| hsa-mir-33  | IRF5      | -0.50 |
| hsa-mir-33  | LY86      | -0.45 |
| hsa-mir-33  | PLB1      | -0.50 |
| hsa-mir-33  | POLD4     | -0.48 |
| hsa-mir-33  | PPM1M     | -0.45 |
| hsa-mir-33  | PYDC1     | -0.48 |
| hsa-mir-33  | SH3TC2    | -0.37 |
| hsa-mir-33  | SLC24A6   | -0.52 |
| hsa-mir-33  | TMEM149   | -0.50 |
| hsa-mir-338 | C7orf13   | -0.26 |
| hsa-mir-339 | AGTPBP1   | 0.46  |
| hsa-mir-339 | AMN       | -0.46 |
| hsa-mir-339 | AVP       | -0.47 |
| hsa-mir-339 | C1orf63   | 0.46  |
| hsa-mir-339 | C6orf60   | 0.46  |
| hsa-mir-339 | CHST3     | -0.46 |
| hsa-mir-339 | CRHBP     | 0.30  |
| hsa-mir-339 | HIST3H2A  | -0.41 |
| hsa-mir-339 | ISOC1     | 0.55  |
| hsa-mir-339 | KIAA1853  | 0.34  |
| hsa-mir-339 | LOC442590 | 0.57  |
| hsa-mir-339 | MAFA      | -0.48 |
| hsa-mir-339 | NEUROG1   | -0.43 |
| hsa-mir-339 | NPBWR1    | -0.50 |
| hsa-mir-339 | NPHP3     | 0.47  |
| hsa-mir-339 | PEX1      | 0.54  |
| hsa-mir-339 | RGN       | 0.47  |
| hsa-mir-339 | TXN2      | -0.64 |
| hsa-mir-339 | ZNF449    | 0.51  |
| hsa-mir-339 | ZNF668    | -0.63 |
| hsa-mir-342 | FRMD7     | -0.53 |
| hsa-mir-342 | MYO10     | -0.39 |
| hsa-mir-345 | PLEKHA4   | -0.32 |
| hsa-mir-346 | ECM1      | -0.44 |
| hsa-mir-346 | GTF2E2    | -0.58 |
| hsa-mir-34a | APOBEC3G  | 0.48  |
| hsa-mir-34a | ARRDC4    | 0.50  |
| hsa-mir-34a | BATF      | 0.46  |
| hsa-mir-34a | BIVM      | -0.47 |
| hsa-mir-34a | CCR7      | 0.51  |
| hsa-mir-34a | FAM113B   | 0.47  |
| hsa-mir-34a | HAMP      | 0.48  |
| hsa-mir-34a | LUC7L     | -0.47 |
| hsa-mir-34a | PAPD1     | -0.59 |
| hsa-mir-34a | PLAU      | 0.53  |
| hsa-mir-34a | PLSCR1    | 0.38  |
| hsa-mir-34a | POGZ      | -0.42 |
| hsa-mir-34a | RILP      | 0.45  |
| hsa-mir-34a | S100A4    | 0.50  |
| hsa-mir-34a | SERPINA5  | 0.52  |
| hsa-mir-34a | SNX10     | 0.55  |
| hsa-mir-34a | SOD2      | 0.54  |

|                |          |       |
|----------------|----------|-------|
| hsa-mir-34a    | TMED5    | 0.34  |
| hsa-mir-34a    | TMEM22   | 0.47  |
| hsa-mir-34a    | TPST1    | 0.46  |
| hsa-mir-34a    | UPP1     | 0.51  |
| hsa-mir-34b    | IL6      | 0.47  |
| hsa-mir-34b    | LOX      | 0.41  |
| hsa-mir-34b    | SERGEF   | 0.42  |
| hsa-mir-34c    | C9orf135 | 0.60  |
| hsa-mir-34c    | LDHB     | -0.49 |
| hsa-mir-34c    | LOX      | 0.58  |
| hsa-mir-361    | CITED4   | -0.38 |
| hsa-mir-363    | C5orf33  | -0.43 |
| hsa-mir-363    | CCDC80   | -0.39 |
| hsa-mir-363    | MED29    | -0.31 |
| hsa-mir-367    | C9orf47  | 0.63  |
| hsa-mir-367    | IL1F10   | 0.75  |
| hsa-mir-367    | MGC14436 | 0.57  |
| hsa-mir-367    | VPS18    | 0.69  |
| hsa-mir-374    | C11orf63 | -0.40 |
| hsa-mir-375    | CNN1     | 0.35  |
| hsa-mir-381    | ERCC6L   | 0.40  |
| hsa-mir-381    | KIF22    | 0.48  |
| hsa-mir-381    | KIFC1    | 0.54  |
| hsa-mir-381    | RACGAP1  | 0.40  |
| hsa-mir-409-3p | CCND2    | 0.36  |
| hsa-mir-424    | C21orf81 | 0.45  |
| hsa-mir-424    | HRASLS   | 0.45  |
| hsa-mir-424    | IRX3     | -0.41 |
| hsa-mir-424    | LRRK2    | 0.39  |
| hsa-mir-432    | OR13A1   | 0.48  |
| hsa-mir-449    | ELOVL7   | 0.47  |
| hsa-mir-450    | C16orf24 | 0.52  |
| hsa-mir-450    | C1orf106 | 0.54  |
| hsa-mir-450    | FRMD5    | 0.53  |
| hsa-mir-450    | KCNS3    | 0.34  |
| hsa-mir-450    | SERHL2   | -0.47 |
| hsa-mir-450    | SOX6     | 0.43  |
| hsa-mir-451    | C15orf37 | 0.47  |
| hsa-mir-451    | RNASEH1  | 0.39  |
| hsa-mir-451    | SCAMP3   | 0.51  |
| hsa-mir-454-3p | ARHGAP9  | -0.43 |
| hsa-mir-454-3p | ARMC2    | -0.47 |
| hsa-mir-454-3p | EGF      | -0.35 |
| hsa-mir-454-3p | ELF2     | 0.43  |
| hsa-mir-454-3p | FLJ39378 | -0.43 |
| hsa-mir-454-3p | HIBADH   | -0.42 |
| hsa-mir-454-3p | LRRC48   | -0.44 |
| hsa-mir-454-3p | SLC12A9  | -0.41 |
| hsa-mir-454-3p | TAGAP    | -0.32 |
| hsa-mir-487b   | CSRP1    | 0.41  |
| hsa-mir-491    | UBR2     | 0.54  |
| hsa-mir-492    | CDH13    | -0.46 |
| hsa-mir-492    | EDA      | -0.40 |
| hsa-mir-492    | FLRT2    | -0.51 |
| hsa-mir-492    | IGF1     | -0.49 |
| hsa-mir-492    | TSN      | 0.46  |

|                |          |       |
|----------------|----------|-------|
| hsa-mir-497    | ARHGAP24 | 0.49  |
| hsa-mir-497    | CWF19L2  | 0.65  |
| hsa-mir-497    | FAM64A   | -0.44 |
| hsa-mir-497    | HEATR2   | -0.44 |
| hsa-mir-497    | HILS1    | -0.49 |
| hsa-mir-497    | NFKBIA   | 0.55  |
| hsa-mir-497    | PCMTD1   | 0.52  |
| hsa-mir-497    | RBM17    | 0.48  |
| hsa-mir-497    | RNF103   | 0.66  |
| hsa-mir-497    | SLC26A2  | -0.51 |
| hsa-mir-503    | ACAT1    | -0.52 |
| hsa-mir-520d   | SDK2     | 0.49  |
| hsa-mir-521    | ANGPTL7  | -0.26 |
| hsa-mir-525    | TGM5     | 0.44  |
| hsa-mir-526a   | HOTAIR   | 0.28  |
| hsa-mir-526b*  | DNAJC4   | 0.34  |
| hsa-mir-526b*  | PLD2     | 0.40  |
| hsa-mir-526b*  | SLC9A11  | 0.52  |
| hsa-mir-526b*  | SPEF1    | 0.47  |
| hsa-mir-526b*  | TMEM81   | -0.41 |
| hsa-mir-532    | BTN2A3   | 0.48  |
| hsa-mir-532    | C1orf106 | -0.48 |
| hsa-mir-542-3p | PDE4B    | 0.37  |
| hsa-mir-542-5p | HRASLS   | 0.51  |
| hsa-mir-548a   | SLC9A11  | 0.56  |
| hsa-mir-548a   | SPEF1    | 0.44  |
| hsa-mir-548a   | TMEM81   | -0.44 |
| hsa-mir-550    | DNAJB14  | 0.33  |
| hsa-mir-551b   | CLIC4    | 0.45  |
| hsa-mir-551b   | TLL1     | 0.42  |
| hsa-mir-560    | KIAA1450 | -0.40 |
| hsa-mir-565    | HECW2    | 0.49  |
| hsa-mir-565    | PCDHB4   | 0.46  |
| hsa-mir-568    | OGT      | 0.44  |
| hsa-mir-568    | SERPINB7 | -0.46 |
| hsa-mir-575    | LGR6     | 0.41  |
| hsa-mir-584    | ELOVL2   | 0.29  |
| hsa-mir-592    | ZBTB8    | 0.48  |
| hsa-mir-599    | CRX      | 0.52  |
| hsa-mir-599    | DNTTIP1  | 0.33  |
| hsa-mir-599    | TAS2R42  | 0.53  |
| hsa-mir-601    | LGR6     | 0.39  |
| hsa-mir-605    | C8orf55  | 0.32  |
| hsa-mir-659    | COL23A1  | 0.45  |
| hsa-mir-660    | MALL     | -0.44 |
| hsa-mir-7      | TLL1     | -0.20 |
| hsa-mir-758    | C6orf129 | 0.45  |
| hsa-mir-768-3p | ERBB4    | 0.48  |
| hsa-mir-770-5p | CHPF     | 0.36  |
| hsa-mir-801    | ARP11    | -0.34 |
| hsa-mir-801    | FLJ10404 | 0.60  |
| hsa-mir-801    | PHC1     | 0.33  |
| hsa-mir-9      | C14orf50 | -0.55 |
| hsa-mir-9      | CSTF2T   | 0.42  |
| hsa-mir-9      | DDIT4L   | -0.57 |
| hsa-mir-9      | DPYD     | -0.57 |

|             |               |       |
|-------------|---------------|-------|
| hsa-mir-9   | EFEMP2        | -0.38 |
| hsa-mir-9   | FAM79B        | -0.58 |
| hsa-mir-9   | H2AFY2        | 0.57  |
| hsa-mir-9   | KIAA1505      | -0.46 |
| hsa-mir-9   | KLRC1         | 0.36  |
| hsa-mir-9   | KLRC2         | 0.36  |
| hsa-mir-9   | LGALS3        | -0.48 |
| hsa-mir-9   | MAP1LC3A      | -0.56 |
| hsa-mir-9   | NMRAL1        | -0.32 |
| hsa-mir-9   | PTGER1        | -0.52 |
| hsa-mir-9*  | ABHD3         | -0.52 |
| hsa-mir-9*  | BMS1          | 0.53  |
| hsa-mir-9*  | C1QTNF2       | -0.46 |
| hsa-mir-9*  | H2AFY2        | 0.54  |
| hsa-mir-9*  | PIN4          | -0.40 |
| hsa-mir-9*  | STARD10       | 0.39  |
| hsa-mir-9*  | ZNF273        | -0.48 |
| hsa-mir-92  | C6orf97       | -0.48 |
| hsa-mir-92  | CHPT1         | -0.45 |
| hsa-mir-92  | CXCR4         | -0.35 |
| hsa-mir-92  | DCDC2         | -0.50 |
| hsa-mir-92  | DDR1          | -0.61 |
| hsa-mir-92  | FABP7         | -0.30 |
| hsa-mir-92  | GCSH          | -0.55 |
| hsa-mir-92  | GJA1          | -0.52 |
| hsa-mir-92  | IL4R          | -0.54 |
| hsa-mir-92  | ITGA6         | -0.53 |
| hsa-mir-92  | ITM2C         | -0.60 |
| hsa-mir-92  | NAT2          | -0.47 |
| hsa-mir-92  | PSAT1         | -0.47 |
| hsa-mir-92  | PTGS1         | -0.42 |
| hsa-mir-92  | RNF135        | -0.56 |
| hsa-mir-92  | TRAF3IP2      | -0.45 |
| hsa-mir-92b | ARL6IP5       | 0.49  |
| hsa-mir-92b | C10orf116     | 0.47  |
| hsa-mir-92b | C16orf59      | -0.44 |
| hsa-mir-92b | C9orf140      | -0.59 |
| hsa-mir-92b | CDC20         | -0.49 |
| hsa-mir-92b | CG018         | 0.46  |
| hsa-mir-92b | DKFZp762E1312 | -0.53 |
| hsa-mir-92b | EDG2          | 0.49  |
| hsa-mir-92b | FAM64A        | -0.46 |
| hsa-mir-92b | FANK1         | 0.58  |
| hsa-mir-92b | FOXM1         | -0.57 |
| hsa-mir-92b | GTSE1         | -0.63 |
| hsa-mir-92b | KAL1          | 0.64  |
| hsa-mir-92b | KIF22         | -0.58 |
| hsa-mir-92b | MCM4          | -0.50 |
| hsa-mir-92b | MYBL2         | -0.57 |
| hsa-mir-92b | PI16          | 0.62  |
| hsa-mir-92b | PLSCR4        | 0.58  |
| hsa-mir-92b | POLG          | -0.44 |
| hsa-mir-92b | PPP2R5A       | 0.49  |
| hsa-mir-92b | RPRM          | 0.38  |
| hsa-mir-92b | SLC35B2       | -0.52 |
| hsa-mir-92b | SPARCL1       | 0.56  |

|             |          |       |
|-------------|----------|-------|
| hsa-mir-92b | TACC3    | -0.58 |
| hsa-mir-93  | LRRC6    | -0.49 |
| hsa-mir-93  | SRR      | -0.09 |
| hsa-mir-93  | ZNF281   | 0.44  |
| hsa-mir-96  | C21orf58 | 0.38  |
| hsa-mir-96  | CATSPER1 | -0.46 |
| hsa-mir-96  | FAM26B   | -0.41 |
| hsa-mir-96  | FLJ25006 | 0.42  |
| hsa-mir-96  | LTF      | -0.36 |
| hsa-mir-96  | MYBL1    | 0.46  |
| hsa-mir-96  | SNX21    | -0.45 |
| hsa-mir-96  | WHSC1    | 0.42  |
| hsa-mir-96  | ZNF238   | 0.47  |
| hsa-mir-99a | COTL1    | -0.56 |
| hsa-mir-99a | FGFR1    | -0.53 |
| hsa-mir-99a | KCNH4    | 0.40  |
| hsa-mir-99a | SNX1     | -0.55 |



**Supplementary Table 4D. Unique Edges in Mesenchymal Subtype**

| <b>miR</b>   | <b>gene</b>   | <b>correlation</b> |
|--------------|---------------|--------------------|
| hsa-let-7c   | DKFZP564J0863 | -0.38              |
| hsa-let-7c   | MAGI2         | 0.49               |
| hsa-let-7c   | SERPINE1      | -0.47              |
| hsa-mir-100  | DDEF2         | 0.59               |
| hsa-mir-100  | TMEM16B       | 0.30               |
| hsa-mir-106a | CYP26A1       | 0.26               |
| hsa-mir-10b  | CDH22         | 0.50               |
| hsa-mir-10b  | PPP1R1B       | 0.46               |
| hsa-mir-124a | ATP1A2        | 0.42               |
| hsa-mir-124a | BCAN          | 0.38               |
| hsa-mir-124a | BCL2A1        | -0.39              |
| hsa-mir-124a | BDH2          | 0.32               |
| hsa-mir-124a | DCLK2         | 0.33               |
| hsa-mir-124a | GCSH          | 0.42               |
| hsa-mir-124a | IFNGR2        | -0.46              |
| hsa-mir-124a | LIX1          | 0.39               |
| hsa-mir-124a | PSAT1         | 0.35               |
| hsa-mir-124a | RGMA          | 0.35               |
| hsa-mir-124a | SLC16A9       | 0.43               |
| hsa-mir-124a | TMPRSS5       | 0.40               |
| hsa-mir-125a | ELMO2         | 0.43               |
| hsa-mir-125b | ABAT          | 0.56               |
| hsa-mir-125b | ARHGEF7       | 0.35               |
| hsa-mir-125b | KIAA1737      | 0.47               |
| hsa-mir-125b | LRRC49        | 0.46               |
| hsa-mir-125b | RBMS1         | -0.43              |
| hsa-mir-125b | RPL8          | -0.49              |
| hsa-mir-125b | SYNPR         | 0.35               |
| hsa-mir-126* | PCCA          | 0.47               |
| hsa-mir-128a | NPM2          | 0.51               |
| hsa-mir-132  | ARP11         | -0.15              |
| hsa-mir-132  | SLFN13        | -0.29              |
| hsa-mir-133a | CXCL1         | 0.44               |
| hsa-mir-135a | C1orf144      | -0.43              |
| hsa-mir-135a | FUT11         | -0.44              |
| hsa-mir-135a | THRSP         | 0.41               |
| hsa-mir-135a | hCG_2004593   | -0.47              |
| hsa-mir-136  | PFKL          | 0.40               |
| hsa-mir-149  | DLEU1         | 0.27               |
| hsa-mir-149  | MOSC1         | 0.42               |
| hsa-mir-149  | NLGN1         | 0.35               |
| hsa-mir-151  | DTYMK         | 0.40               |
| hsa-mir-155  | ITM2C         | -0.30              |
| hsa-mir-15b  | PTHLH         | 0.37               |
| hsa-mir-181a | AGPAT5        | 0.39               |
| hsa-mir-181a | TNFRSF19      | 0.36               |
| hsa-mir-181b | AGT           | 0.34               |
| hsa-mir-181b | MOSC1         | 0.30               |
| hsa-mir-181b | STYK1         | -0.37              |
| hsa-mir-181c | ABAT          | 0.58               |
| hsa-mir-181c | AGT           | 0.47               |
| hsa-mir-181c | ANKFN1        | 0.49               |
| hsa-mir-181c | ANTXR2        | -0.48              |

|              |              |       |
|--------------|--------------|-------|
| hsa-mir-181c | AQP4         | 0.46  |
| hsa-mir-181c | ASAM         | -0.49 |
| hsa-mir-181c | BAI3         | 0.51  |
| hsa-mir-181c | BCAN         | 0.54  |
| hsa-mir-181c | C1orf165     | 0.42  |
| hsa-mir-181c | C1orf61      | 0.46  |
| hsa-mir-181c | CRB1         | 0.52  |
| hsa-mir-181c | CSPG5        | 0.56  |
| hsa-mir-181c | CTNND2       | 0.53  |
| hsa-mir-181c | DENND2A      | 0.48  |
| hsa-mir-181c | EYA2         | 0.42  |
| hsa-mir-181c | FMN2         | 0.53  |
| hsa-mir-181c | LOC389073    | 0.38  |
| hsa-mir-181c | LRRC3B       | 0.38  |
| hsa-mir-181c | LRRN2        | 0.41  |
| hsa-mir-181c | MAGI2        | 0.46  |
| hsa-mir-181c | MAP2         | 0.50  |
| hsa-mir-181c | MCTP2        | -0.46 |
| hsa-mir-181c | PCDH9        | 0.45  |
| hsa-mir-181c | POMT1        | 0.52  |
| hsa-mir-181c | PSRC1        | 0.51  |
| hsa-mir-181c | PTGER2       | -0.53 |
| hsa-mir-181c | PTPRA        | 0.48  |
| hsa-mir-181c | PTPRZ1       | 0.56  |
| hsa-mir-181c | RLBP1        | 0.41  |
| hsa-mir-181c | RP6-213H19.1 | -0.52 |
| hsa-mir-181c | RPRML        | 0.46  |
| hsa-mir-181c | RUNX2        | -0.59 |
| hsa-mir-181c | SOX9         | 0.62  |
| hsa-mir-181c | SUMF2        | 0.42  |
| hsa-mir-181c | TMPRSS5      | 0.45  |
| hsa-mir-181c | TRIM9        | 0.55  |
| hsa-mir-181c | WSCD1        | 0.59  |
| hsa-mir-181c | ZNF606       | 0.43  |
| hsa-mir-181d | ABAT         | 0.59  |
| hsa-mir-181d | ACSBG1       | 0.48  |
| hsa-mir-181d | ACSL6        | 0.29  |
| hsa-mir-181d | AGT          | 0.50  |
| hsa-mir-181d | ANTXR2       | -0.51 |
| hsa-mir-181d | APC          | 0.48  |
| hsa-mir-181d | APC2         | 0.49  |
| hsa-mir-181d | AQP4         | 0.48  |
| hsa-mir-181d | ASCL1        | 0.50  |
| hsa-mir-181d | BAI3         | 0.60  |
| hsa-mir-181d | BBOX1        | 0.36  |
| hsa-mir-181d | BCAN         | 0.59  |
| hsa-mir-181d | CSPG5        | 0.61  |
| hsa-mir-181d | CTNND2       | 0.53  |
| hsa-mir-181d | DCLK2        | 0.53  |
| hsa-mir-181d | DDR1         | 0.50  |
| hsa-mir-181d | DENND2A      | 0.57  |
| hsa-mir-181d | DGKB         | 0.47  |
| hsa-mir-181d | DTNA         | 0.50  |
| hsa-mir-181d | ELAVL4       | 0.46  |
| hsa-mir-181d | FMN2         | 0.57  |
| hsa-mir-181d | H2AFJ        | -0.53 |

|              |           |       |
|--------------|-----------|-------|
| hsa-mir-181d | HIP1R     | 0.50  |
| hsa-mir-181d | IGSF11    | 0.50  |
| hsa-mir-181d | IL17D     | 0.53  |
| hsa-mir-181d | KCNIP1    | 0.46  |
| hsa-mir-181d | KCNJ10    | 0.41  |
| hsa-mir-181d | LEPREL2   | -0.39 |
| hsa-mir-181d | LOC129881 | 0.33  |
| hsa-mir-181d | LOC57228  | -0.45 |
| hsa-mir-181d | LRRC3B    | 0.41  |
| hsa-mir-181d | LRRTM3    | 0.65  |
| hsa-mir-181d | MAGI2     | 0.47  |
| hsa-mir-181d | MAPT      | 0.53  |
| hsa-mir-181d | MMD2      | 0.42  |
| hsa-mir-181d | MOSC2     | 0.46  |
| hsa-mir-181d | NCAN      | 0.48  |
| hsa-mir-181d | NELL2     | 0.36  |
| hsa-mir-181d | NLGN1     | 0.52  |
| hsa-mir-181d | NLGN3     | 0.63  |
| hsa-mir-181d | PCDH8     | 0.46  |
| hsa-mir-181d | PCDH9     | 0.54  |
| hsa-mir-181d | PHLDB2    | -0.56 |
| hsa-mir-181d | PHYHIPL   | 0.49  |
| hsa-mir-181d | RAB6B     | 0.42  |
| hsa-mir-181d | RHOD      | -0.48 |
| hsa-mir-181d | ROBO2     | 0.54  |
| hsa-mir-181d | RPRML     | 0.43  |
| hsa-mir-181d | RUNX2     | -0.62 |
| hsa-mir-181d | SALL2     | 0.58  |
| hsa-mir-181d | SHC3      | 0.53  |
| hsa-mir-181d | SOX9      | 0.65  |
| hsa-mir-181d | SUNC1     | -0.52 |
| hsa-mir-181d | THRA      | 0.47  |
| hsa-mir-181d | TRIM9     | 0.65  |
| hsa-mir-181d | TSPAN3    | 0.51  |
| hsa-mir-181d | WASF3     | 0.54  |
| hsa-mir-181d | WSCD1     | 0.66  |
| hsa-mir-181d | ZFP2      | 0.54  |
| hsa-mir-182  | ABHD8     | 0.46  |
| hsa-mir-183  | GKN1      | -0.39 |
| hsa-mir-188  | CRISPLD2  | 0.53  |
| hsa-mir-191* | UQCRH     | 0.35  |
| hsa-mir-192  | FLJ43987  | -0.36 |
| hsa-mir-193a | CCDC42    | 0.53  |
| hsa-mir-193a | KIAA1199  | 0.41  |
| hsa-mir-193b | HIST1H2AM | 0.43  |
| hsa-mir-195  | ADAMTS12  | -0.30 |
| hsa-mir-195  | BNC2      | -0.41 |
| hsa-mir-195  | GAB1      | 0.41  |
| hsa-mir-195  | GAP43     | 0.30  |
| hsa-mir-195  | KCNA2     | 0.44  |
| hsa-mir-195  | KIF21A    | 0.43  |
| hsa-mir-195  | LRRTM2    | 0.31  |
| hsa-mir-195  | ROBO2     | 0.50  |
| hsa-mir-195  | SAMD14    | 0.53  |
| hsa-mir-195  | SERPINE1  | -0.49 |
| hsa-mir-195  | SLC35F1   | 0.37  |

|               |          |       |
|---------------|----------|-------|
| hsa-mir-195   | TSLP     | -0.44 |
| hsa-mir-195   | TSPAN7   | 0.38  |
| hsa-mir-196a  | ATP1A2   | 0.32  |
| hsa-mir-196a  | C1QTNF4  | 0.46  |
| hsa-mir-196a  | FRY      | 0.38  |
| hsa-mir-196a  | HMP19    | 0.47  |
| hsa-mir-196a  | NEFM     | 0.40  |
| hsa-mir-196a  | PI16     | 0.34  |
| hsa-mir-197   | PHEX     | 0.38  |
| hsa-mir-198   | AP3S1    | 0.46  |
| hsa-mir-199a  | ADD2     | -0.33 |
| hsa-mir-199a  | ANTXR2   | 0.58  |
| hsa-mir-199a  | ARID5A   | -0.41 |
| hsa-mir-199a  | ASAM     | 0.58  |
| hsa-mir-199a  | BICD1    | -0.37 |
| hsa-mir-199a  | C1orf21  | -0.48 |
| hsa-mir-199a  | COL6A1   | 0.62  |
| hsa-mir-199a  | DBI      | -0.49 |
| hsa-mir-199a  | DPT      | 0.75  |
| hsa-mir-199a  | ENPP1    | 0.53  |
| hsa-mir-199a  | FAM131B  | -0.42 |
| hsa-mir-199a  | FAP      | 0.65  |
| hsa-mir-199a  | FBN1     | 0.51  |
| hsa-mir-199a  | FKBP7    | 0.69  |
| hsa-mir-199a  | FZD6     | 0.47  |
| hsa-mir-199a  | GHR      | 0.31  |
| hsa-mir-199a  | GLT8D2   | 0.76  |
| hsa-mir-199a  | KIAA0226 | -0.48 |
| hsa-mir-199a  | KIF21A   | -0.43 |
| hsa-mir-199a  | KLF11    | 0.53  |
| hsa-mir-199a  | LRRC17   | 0.57  |
| hsa-mir-199a  | MAMDC2   | 0.54  |
| hsa-mir-199a  | MMP2     | 0.62  |
| hsa-mir-199a  | MOSC1    | -0.44 |
| hsa-mir-199a  | NLGN1    | -0.54 |
| hsa-mir-199a  | PHLDB2   | 0.50  |
| hsa-mir-199a  | POU3F2   | -0.32 |
| hsa-mir-199a  | PTGER2   | 0.54  |
| hsa-mir-199a  | RAB3IP   | -0.48 |
| hsa-mir-199a  | ROR2     | 0.69  |
| hsa-mir-199a  | SEMA3C   | 0.46  |
| hsa-mir-199a  | SERTAD4  | 0.65  |
| hsa-mir-199a  | TSKU     | 0.61  |
| hsa-mir-199a  | TUBB2B   | -0.43 |
| hsa-mir-199a* | ACVR1    | 0.58  |
| hsa-mir-199a* | ASAM     | 0.52  |
| hsa-mir-199a* | CREB5    | -0.33 |
| hsa-mir-199a* | DKK2     | 0.57  |
| hsa-mir-199a* | DPT      | 0.69  |
| hsa-mir-199a* | FAP      | 0.64  |
| hsa-mir-199a* | HPGD     | 0.38  |
| hsa-mir-199a* | KLF11    | 0.45  |
| hsa-mir-199a* | MAMDC2   | 0.55  |
| hsa-mir-199a* | MICAL2   | 0.53  |
| hsa-mir-199a* | MOSC1    | -0.47 |
| hsa-mir-199a* | NLGN1    | -0.48 |

|               |           |       |
|---------------|-----------|-------|
| hsa-mir-199a* | NTN4      | 0.34  |
| hsa-mir-199a* | SEC24D    | 0.61  |
| hsa-mir-199a* | TUBB2B    | -0.40 |
| hsa-mir-199a* | TWIST1    | 0.53  |
| hsa-mir-199b  | ATP8A2    | 0.45  |
| hsa-mir-199b  | DBI       | -0.53 |
| hsa-mir-199b  | DKK2      | 0.56  |
| hsa-mir-199b  | HTRA3     | 0.63  |
| hsa-mir-199b  | MICAL2    | 0.50  |
| hsa-mir-199b  | MME       | 0.53  |
| hsa-mir-199b  | PTGER2    | 0.54  |
| hsa-mir-199b  | TSKU      | 0.55  |
| hsa-mir-199b  | TSPAN9    | 0.60  |
| hsa-mir-199b  | WFDC1     | 0.48  |
| hsa-mir-19a   | SSR4      | 0.42  |
| hsa-mir-204   | CRIM1     | 0.50  |
| hsa-mir-204   | DCBLD2    | 0.42  |
| hsa-mir-204   | DDEF2     | 0.38  |
| hsa-mir-204   | EMP1      | 0.38  |
| hsa-mir-20a   | IFIT1L    | 0.32  |
| hsa-mir-210   | VWF       | -0.38 |
| hsa-mir-214   | ANTXR2    | 0.59  |
| hsa-mir-214   | C1orf21   | -0.46 |
| hsa-mir-214   | CGN       | -0.47 |
| hsa-mir-214   | COL5A2    | 0.68  |
| hsa-mir-214   | COL6A1    | 0.63  |
| hsa-mir-214   | CPZ       | 0.49  |
| hsa-mir-214   | CREB5     | -0.41 |
| hsa-mir-214   | CXCL12    | 0.43  |
| hsa-mir-214   | DPT       | 0.74  |
| hsa-mir-214   | EMILIN3   | -0.36 |
| hsa-mir-214   | EPHA3     | 0.42  |
| hsa-mir-214   | FKBP7     | 0.71  |
| hsa-mir-214   | GLT8D2    | 0.72  |
| hsa-mir-214   | KIAA0226  | -0.52 |
| hsa-mir-214   | KIAA1432  | 0.39  |
| hsa-mir-214   | LMO2      | -0.42 |
| hsa-mir-214   | LOC201725 | 0.52  |
| hsa-mir-214   | LUM       | 0.76  |
| hsa-mir-214   | MDFIC     | 0.56  |
| hsa-mir-214   | MOSC1     | -0.45 |
| hsa-mir-214   | P4HA2     | 0.60  |
| hsa-mir-214   | PAPSS2    | 0.49  |
| hsa-mir-214   | PHLDB2    | 0.54  |
| hsa-mir-214   | PPFIBP1   | 0.43  |
| hsa-mir-214   | PRRX1     | 0.43  |
| hsa-mir-214   | RASL11B   | 0.59  |
| hsa-mir-214   | RCN1      | 0.43  |
| hsa-mir-214   | RCN3      | 0.69  |
| hsa-mir-214   | ROR2      | 0.74  |
| hsa-mir-214   | SALL2     | -0.51 |
| hsa-mir-214   | SDC2      | 0.44  |
| hsa-mir-214   | SEC24D    | 0.63  |
| hsa-mir-214   | SEMA3C    | 0.49  |
| hsa-mir-214   | SERPINF1  | 0.53  |
| hsa-mir-214   | STAMBPL1  | 0.39  |

|             |            |       |
|-------------|------------|-------|
| hsa-mir-214 | TBC1D8B    | 0.58  |
| hsa-mir-214 | TMEM64     | 0.39  |
| hsa-mir-214 | TSC22D3    | 0.43  |
| hsa-mir-214 | TSKU       | 0.57  |
| hsa-mir-214 | TYRO3      | -0.42 |
| hsa-mir-214 | WIPF1      | 0.40  |
| hsa-mir-214 | YIPF5      | 0.33  |
| hsa-mir-214 | ZNF219     | -0.49 |
| hsa-mir-219 | DYNLT3     | -0.38 |
| hsa-mir-219 | GCNT1      | -0.27 |
| hsa-mir-219 | PUNC       | 0.35  |
| hsa-mir-219 | RXFP2      | -0.31 |
| hsa-mir-22  | FGFBP3     | -0.49 |
| hsa-mir-22  | NPTX1      | -0.41 |
| hsa-mir-22  | SH2D2A     | 0.47  |
| hsa-mir-22  | TMEM170    | -0.46 |
| hsa-mir-22  | TMEM59L    | -0.30 |
| hsa-mir-22  | WASF3      | -0.38 |
| hsa-mir-22  | tcag7.1260 | 0.49  |
| hsa-mir-221 | CAPN2      | 0.45  |
| hsa-mir-221 | CES7       | -0.15 |
| hsa-mir-221 | CRB1       | -0.52 |
| hsa-mir-221 | DKK1       | 0.48  |
| hsa-mir-221 | FGFR2      | -0.49 |
| hsa-mir-221 | HMGA1      | 0.52  |
| hsa-mir-221 | IL1R2      | -0.31 |
| hsa-mir-221 | IPPK       | 0.35  |
| hsa-mir-221 | ITGA3      | 0.54  |
| hsa-mir-221 | KIAA1324L  | -0.47 |
| hsa-mir-221 | NCALD      | -0.43 |
| hsa-mir-221 | PLCB4      | -0.44 |
| hsa-mir-221 | RSHL3      | -0.48 |
| hsa-mir-221 | SEMA5B     | -0.47 |
| hsa-mir-221 | SLC47A2    | -0.51 |
| hsa-mir-221 | SRPX       | 0.49  |
| hsa-mir-221 | STK17A     | 0.52  |
| hsa-mir-221 | TMIE       | -0.45 |
| hsa-mir-221 | TRIM2      | -0.61 |
| hsa-mir-222 | 7-Sep      | -0.39 |
| hsa-mir-222 | AQP1       | -0.52 |
| hsa-mir-222 | C1orf87    | -0.40 |
| hsa-mir-222 | CCDC40     | -0.52 |
| hsa-mir-222 | CDKN1C     | -0.35 |
| hsa-mir-222 | CLASP2     | -0.51 |
| hsa-mir-222 | CNIH3      | 0.59  |
| hsa-mir-222 | CRB1       | -0.61 |
| hsa-mir-222 | CXXC4      | -0.53 |
| hsa-mir-222 | CXorf26    | 0.43  |
| hsa-mir-222 | DGKB       | -0.51 |
| hsa-mir-222 | ELOVL6     | 0.47  |
| hsa-mir-222 | FGFR2      | -0.54 |
| hsa-mir-222 | FLJ31568   | -0.36 |
| hsa-mir-222 | GFPT2      | 0.44  |
| hsa-mir-222 | GFRA2      | -0.43 |
| hsa-mir-222 | GNAO1      | -0.52 |
| hsa-mir-222 | GPR155     | -0.42 |

|             |            |       |
|-------------|------------|-------|
| hsa-mir-222 | GPR17      | -0.40 |
| hsa-mir-222 | HEATR1     | 0.48  |
| hsa-mir-222 | HSPD1      | 0.43  |
| hsa-mir-222 | IPPK       | 0.40  |
| hsa-mir-222 | KCNA5      | -0.42 |
| hsa-mir-222 | KIAA1324L  | -0.58 |
| hsa-mir-222 | LOC55565   | -0.49 |
| hsa-mir-222 | MGAT4B     | 0.55  |
| hsa-mir-222 | MTUS1      | -0.46 |
| hsa-mir-222 | NCALD      | -0.48 |
| hsa-mir-222 | NSMCE1     | 0.32  |
| hsa-mir-222 | OLFM4      | -0.49 |
| hsa-mir-222 | PDZRN4     | -0.55 |
| hsa-mir-222 | PPP1R1B    | -0.57 |
| hsa-mir-222 | RAI2       | -0.54 |
| hsa-mir-222 | RPS4X      | 0.39  |
| hsa-mir-222 | RSHL3      | -0.58 |
| hsa-mir-222 | ST6GALNAC3 | -0.49 |
| hsa-mir-222 | STK17A     | 0.52  |
| hsa-mir-222 | TMIE       | -0.54 |
| hsa-mir-222 | TMPRSS5    | -0.48 |
| hsa-mir-222 | TNFRSF12A  | 0.61  |
| hsa-mir-222 | TOMM34     | 0.49  |
| hsa-mir-222 | TXNDC6     | -0.55 |
| hsa-mir-222 | WDR16      | -0.48 |
| hsa-mir-222 | ZNF366     | -0.46 |
| hsa-mir-224 | ADRBK2     | 0.34  |
| hsa-mir-23a | ATP1A2     | -0.41 |
| hsa-mir-23a | CA3        | -0.39 |
| hsa-mir-23a | RGS3       | 0.38  |
| hsa-mir-24  | ALDH6A1    | -0.52 |
| hsa-mir-24  | ALDOC      | -0.39 |
| hsa-mir-24  | ATP1A2     | -0.59 |
| hsa-mir-24  | AVEN       | 0.47  |
| hsa-mir-24  | FBN1       | 0.36  |
| hsa-mir-24  | GABPB2     | 0.45  |
| hsa-mir-24  | KBTBD11    | -0.52 |
| hsa-mir-24  | PCMTD2     | -0.32 |
| hsa-mir-24  | PPAP2B     | -0.49 |
| hsa-mir-24  | PRR16      | 0.45  |
| hsa-mir-24  | SALL2      | -0.59 |
| hsa-mir-24  | SEMA6A     | -0.45 |
| hsa-mir-24  | SENP5      | 0.44  |
| hsa-mir-24  | TSC22D4    | -0.51 |
| hsa-mir-27a | ACAD8      | -0.44 |
| hsa-mir-27a | ASB6       | 0.43  |
| hsa-mir-27a | C12orf45   | 0.29  |
| hsa-mir-27a | C6orf192   | -0.48 |
| hsa-mir-27a | CA3        | -0.37 |
| hsa-mir-27a | DCLK2      | -0.43 |
| hsa-mir-27a | EXOSC2     | 0.38  |
| hsa-mir-27a | MASP1      | -0.45 |
| hsa-mir-27a | SALL2      | -0.47 |
| hsa-mir-27a | TRIM32     | 0.42  |
| hsa-mir-27a | TSPAN12    | -0.46 |
| hsa-mir-28  | SLC27A2    | 0.29  |

|                |           |       |
|----------------|-----------|-------|
| hsa-mir-299-3p | PI3       | -0.34 |
| hsa-mir-29a    | TCHH      | 0.32  |
| hsa-mir-301    | CAV1      | -0.55 |
| hsa-mir-301    | EFNB3     | 0.44  |
| hsa-mir-301    | MGC33846  | 0.41  |
| hsa-mir-301    | PGRMC2    | -0.23 |
| hsa-mir-302c*  | BRI3      | 0.46  |
| hsa-mir-302c*  | FLJ31568  | -0.50 |
| hsa-mir-30a-3p | FAP       | -0.39 |
| hsa-mir-30a-3p | STRA6     | -0.32 |
| hsa-mir-30a-5p | STRA6     | -0.44 |
| hsa-mir-30a-5p | SVIL      | -0.57 |
| hsa-mir-30b    | PDYN      | 0.44  |
| hsa-mir-30b    | RIMBP2    | 0.50  |
| hsa-mir-30b    | ZNF415    | 0.38  |
| hsa-mir-30c    | ANTXR2    | -0.45 |
| hsa-mir-30c    | B3GAT1    | 0.53  |
| hsa-mir-30c    | CAMK2B    | 0.46  |
| hsa-mir-30c    | CAND2     | 0.56  |
| hsa-mir-30c    | CHMP2A    | 0.49  |
| hsa-mir-30c    | FAM35A    | -0.37 |
| hsa-mir-30c    | FAP       | -0.45 |
| hsa-mir-30c    | GATM      | 0.56  |
| hsa-mir-30c    | KIF21A    | 0.48  |
| hsa-mir-30c    | LMO2      | 0.53  |
| hsa-mir-30c    | NELL2     | 0.53  |
| hsa-mir-30c    | NLGN1     | 0.52  |
| hsa-mir-30c    | NLGN3     | 0.46  |
| hsa-mir-30c    | PNMA2     | 0.50  |
| hsa-mir-30c    | PREX1     | 0.37  |
| hsa-mir-30c    | SCAMP5    | 0.45  |
| hsa-mir-30c    | TRIM9     | 0.53  |
| hsa-mir-30e-3p | B3GAT1    | 0.40  |
| hsa-mir-31     | C20orf26  | -0.27 |
| hsa-mir-31     | IBSP      | -0.37 |
| hsa-mir-31     | MCHR1     | -0.41 |
| hsa-mir-31     | ZNF195    | -0.39 |
| hsa-mir-32     | KRTDAP    | 0.41  |
| hsa-mir-32     | LOC131149 | 0.41  |
| hsa-mir-324-3p | SOBP      | -0.47 |
| hsa-mir-324-5p | CYP2J2    | 0.53  |
| hsa-mir-33     | NACA2     | -0.22 |
| hsa-mir-331    | ASCL1     | 0.39  |
| hsa-mir-331    | CCDC65    | 0.30  |
| hsa-mir-331    | DPT       | -0.39 |
| hsa-mir-331    | GPR56     | 0.33  |
| hsa-mir-331    | LRRC51    | 0.28  |
| hsa-mir-331    | LRRN2     | 0.42  |
| hsa-mir-331    | MANEAL    | 0.37  |
| hsa-mir-331    | MFAP2     | -0.37 |
| hsa-mir-331    | STXBP5    | -0.36 |
| hsa-mir-331    | TUBB2B    | 0.41  |
| hsa-mir-335    | ANXA2     | -0.51 |
| hsa-mir-335    | APOBEC3B  | -0.35 |
| hsa-mir-335    | CAV1      | -0.45 |
| hsa-mir-335    | CD109     | -0.49 |



|                |           |       |
|----------------|-----------|-------|
| hsa-mir-335    | LOC493869 | -0.44 |
| hsa-mir-339    | F11R      | -0.24 |
| hsa-mir-342    | HSD17B4   | 0.46  |
| hsa-mir-342    | LOC130951 | 0.53  |
| hsa-mir-362    | LSM11     | 0.49  |
| hsa-mir-363    | GPR162    | 0.45  |
| hsa-mir-363    | PCSK1N    | 0.42  |
| hsa-mir-368    | ZNF544    | 0.41  |
| hsa-mir-369-3p | ADM       | -0.32 |
| hsa-mir-370    | MRPS17    | -0.31 |
| hsa-mir-376a   | ZNF544    | 0.42  |
| hsa-mir-410    | COG3      | 0.50  |
| hsa-mir-410    | RCOR2     | 0.41  |
| hsa-mir-422b   | ASB3      | -0.49 |
| hsa-mir-422b   | BACE2     | 0.49  |
| hsa-mir-432    | JMJD3     | 0.42  |
| hsa-mir-449    | GPR141    | 0.51  |
| hsa-mir-452    | CYP4Z1    | -0.33 |
| hsa-mir-454-3p | BAI2      | 0.35  |
| hsa-mir-484    | FOXP4     | -0.57 |
| hsa-mir-487b   | CLEC4D    | -0.31 |
| hsa-mir-487b   | CXCL2     | -0.40 |
| hsa-mir-493-5p | GPX4      | -0.27 |
| hsa-mir-497    | 8-Sep     | 0.58  |
| hsa-mir-497    | ACSBG1    | 0.48  |
| hsa-mir-497    | ALDH18A1  | -0.45 |
| hsa-mir-497    | C4orf19   | 0.35  |
| hsa-mir-497    | CSPG5     | 0.46  |
| hsa-mir-497    | DSCR2     | -0.54 |
| hsa-mir-497    | ERLIN1    | -0.45 |
| hsa-mir-497    | FAM69B    | 0.45  |
| hsa-mir-497    | GPLD1     | 0.52  |
| hsa-mir-497    | GPR123    | 0.55  |
| hsa-mir-497    | KCNA2     | 0.56  |
| hsa-mir-497    | KIF21A    | 0.51  |
| hsa-mir-497    | LMTK3     | 0.53  |
| hsa-mir-497    | LRRC3B    | 0.47  |
| hsa-mir-497    | MARK1     | 0.46  |
| hsa-mir-497    | MCF2L     | 0.46  |
| hsa-mir-497    | NCALD     | 0.47  |
| hsa-mir-497    | NTRK3     | 0.50  |
| hsa-mir-497    | NUDT5     | -0.44 |
| hsa-mir-497    | OLIG1     | 0.41  |
| hsa-mir-497    | OLIG2     | 0.42  |
| hsa-mir-497    | PDE4B     | 0.46  |
| hsa-mir-497    | PEG3      | 0.31  |
| hsa-mir-497    | RAB27A    | -0.54 |
| hsa-mir-497    | RGS5      | 0.35  |
| hsa-mir-497    | ROBO2     | 0.59  |
| hsa-mir-497    | TRAK1     | 0.50  |
| hsa-mir-497    | VEGFC     | -0.51 |
| hsa-mir-497    | ZFP2      | 0.64  |
| hsa-mir-497    | ZNF177    | 0.55  |
| hsa-mir-497    | ZNF287    | 0.56  |
| hsa-mir-505    | IL1R1     | 0.34  |
| hsa-mir-514    | TMEM106A  | -0.23 |

|                |           |       |
|----------------|-----------|-------|
| hsa-mir-532    | AGTR1     | 0.43  |
| hsa-mir-542-3p | MPND      | 0.43  |
| hsa-mir-551b   | FMN2      | 0.54  |
| hsa-mir-551b   | FXVD6     | 0.40  |
| hsa-mir-551b   | IGSF11    | 0.56  |
| hsa-mir-551b   | LMTK3     | 0.39  |
| hsa-mir-551b   | MYH7      | 0.58  |
| hsa-mir-551b   | OLIG2     | 0.40  |
| hsa-mir-551b   | SALL1     | 0.49  |
| hsa-mir-551b   | SYT17     | 0.56  |
| hsa-mir-557    | AP3S1     | 0.57  |
| hsa-mir-585    | LMTK2     | 0.48  |
| hsa-mir-590    | GRAMD2    | -0.37 |
| hsa-mir-590    | SC4MOL    | 0.27  |
| hsa-mir-596    | PTDSS2    | -0.34 |
| hsa-mir-598    | BATF2     | 0.39  |
| hsa-mir-622    | PLA2G7    | 0.36  |
| hsa-mir-625    | ZNF780A   | -0.57 |
| hsa-mir-629    | AP3S1     | 0.49  |
| hsa-mir-629    | ZNF229    | -0.36 |
| hsa-mir-652    | LRRN2     | 0.37  |
| hsa-mir-671    | PLA2G7    | 0.30  |
| hsa-mir-768-3p | FBXO17    | 0.34  |
| hsa-mir-769-5p | ABL2      | -0.35 |
| hsa-mir-769-5p | CSPG5     | 0.36  |
| hsa-mir-769-5p | LRRC36    | 0.23  |
| hsa-mir-9      | ABAT      | 0.54  |
| hsa-mir-9      | ACCN2     | 0.44  |
| hsa-mir-9      | ACTN2     | 0.42  |
| hsa-mir-9      | ADAMTS12  | -0.52 |
| hsa-mir-9      | ANTXR2    | -0.57 |
| hsa-mir-9      | APC       | 0.26  |
| hsa-mir-9      | ASAM      | -0.41 |
| hsa-mir-9      | BEST3     | 0.47  |
| hsa-mir-9      | C1orf61   | 0.56  |
| hsa-mir-9      | C1orf78   | -0.47 |
| hsa-mir-9      | CAMK2B    | 0.38  |
| hsa-mir-9      | CAMTA1    | 0.35  |
| hsa-mir-9      | CELSR2    | 0.45  |
| hsa-mir-9      | CSPG5     | 0.49  |
| hsa-mir-9      | DPF1      | 0.61  |
| hsa-mir-9      | DSCAM     | 0.45  |
| hsa-mir-9      | DTNA      | 0.33  |
| hsa-mir-9      | EBF1      | -0.47 |
| hsa-mir-9      | EEF1A2    | 0.35  |
| hsa-mir-9      | FAM131B   | 0.37  |
| hsa-mir-9      | FMN2      | 0.40  |
| hsa-mir-9      | GATM      | 0.43  |
| hsa-mir-9      | GPM6B     | 0.49  |
| hsa-mir-9      | HIP1R     | 0.44  |
| hsa-mir-9      | JAKMIP2   | 0.36  |
| hsa-mir-9      | KCNA2     | 0.31  |
| hsa-mir-9      | KIAA1737  | 0.45  |
| hsa-mir-9      | KIF21A    | 0.44  |
| hsa-mir-9      | LMO2      | 0.47  |
| hsa-mir-9      | LOC389073 | 0.38  |

|            |         |       |
|------------|---------|-------|
| hsa-mir-9  | LRRTM2  | 0.27  |
| hsa-mir-9  | LRRTM3  | 0.49  |
| hsa-mir-9  | MAG11   | 0.51  |
| hsa-mir-9  | MCTP2   | -0.45 |
| hsa-mir-9  | MKL2    | 0.25  |
| hsa-mir-9  | MME     | -0.46 |
| hsa-mir-9  | MPPED2  | 0.36  |
| hsa-mir-9  | MPZL1   | -0.42 |
| hsa-mir-9  | MRCL3   | -0.52 |
| hsa-mir-9  | NCAN    | 0.40  |
| hsa-mir-9  | NLGN1   | 0.49  |
| hsa-mir-9  | NLGN3   | 0.54  |
| hsa-mir-9  | NXPH1   | 0.36  |
| hsa-mir-9  | PDZD2   | 0.30  |
| hsa-mir-9  | PDZD4   | 0.38  |
| hsa-mir-9  | PHLDB2  | -0.48 |
| hsa-mir-9  | PNMA2   | 0.42  |
| hsa-mir-9  | PSD2    | 0.41  |
| hsa-mir-9  | RAB6B   | 0.39  |
| hsa-mir-9  | RALGPS1 | 0.54  |
| hsa-mir-9  | REEP1   | 0.36  |
| hsa-mir-9  | RET     | 0.39  |
| hsa-mir-9  | SDC1    | -0.29 |
| hsa-mir-9  | SH2D2A  | -0.37 |
| hsa-mir-9  | SLC24A5 | 0.57  |
| hsa-mir-9  | SLC35F1 | 0.46  |
| hsa-mir-9  | SLC6A1  | 0.35  |
| hsa-mir-9  | SYP     | 0.24  |
| hsa-mir-9  | TGFBI   | -0.53 |
| hsa-mir-9  | TM4SF19 | -0.39 |
| hsa-mir-9  | TNFSF10 | -0.46 |
| hsa-mir-9  | TRIM9   | 0.48  |
| hsa-mir-9  | TSPAN7  | 0.41  |
| hsa-mir-9  | WASF3   | 0.47  |
| hsa-mir-9  | ZDHHC22 | 0.54  |
| hsa-mir-9  | ZNF91   | 0.29  |
| hsa-mir-9* | ABAT    | 0.52  |
| hsa-mir-9* | ALDOC   | 0.35  |
| hsa-mir-9* | ASAM    | -0.42 |
| hsa-mir-9* | BAI3    | 0.39  |
| hsa-mir-9* | BBOX1   | 0.33  |
| hsa-mir-9* | BNC2    | -0.47 |
| hsa-mir-9* | BNIP2   | -0.46 |
| hsa-mir-9* | CCR2    | -0.32 |
| hsa-mir-9* | CELSR2  | 0.42  |
| hsa-mir-9* | CMTM6   | -0.45 |
| hsa-mir-9* | CSPG5   | 0.48  |
| hsa-mir-9* | CTNND2  | 0.40  |
| hsa-mir-9* | DPF1    | 0.55  |
| hsa-mir-9* | DPP6    | 0.45  |
| hsa-mir-9* | DPYSL2  | 0.23  |
| hsa-mir-9* | DSCAM   | 0.37  |
| hsa-mir-9* | DTNA    | 0.34  |
| hsa-mir-9* | EEF1A2  | 0.31  |
| hsa-mir-9* | FMN2    | 0.44  |
| hsa-mir-9* | GATM    | 0.43  |

|             |              |       |
|-------------|--------------|-------|
| hsa-mir-9*  | GPM6B        | 0.41  |
| hsa-mir-9*  | HOXB6        | -0.27 |
| hsa-mir-9*  | JAKMIP2      | 0.38  |
| hsa-mir-9*  | KLHDC8A      | 0.31  |
| hsa-mir-9*  | MAP2         | 0.32  |
| hsa-mir-9*  | MPPED2       | 0.32  |
| hsa-mir-9*  | MYH7         | 0.43  |
| hsa-mir-9*  | NAT8L        | 0.45  |
| hsa-mir-9*  | NHLH1        | 0.17  |
| hsa-mir-9*  | NKX2-2       | 0.30  |
| hsa-mir-9*  | NLGN1        | 0.49  |
| hsa-mir-9*  | PHLDB2       | -0.48 |
| hsa-mir-9*  | PNMA2        | 0.46  |
| hsa-mir-9*  | POU3F2       | 0.41  |
| hsa-mir-9*  | PROX1        | 0.28  |
| hsa-mir-9*  | PSD2         | 0.38  |
| hsa-mir-9*  | PSME4        | -0.33 |
| hsa-mir-9*  | PTGFR        | -0.31 |
| hsa-mir-9*  | PXDN         | -0.31 |
| hsa-mir-9*  | RAB6B        | 0.36  |
| hsa-mir-9*  | RECK         | -0.49 |
| hsa-mir-9*  | ROD1         | -0.42 |
| hsa-mir-9*  | RP6-213H19.1 | -0.44 |
| hsa-mir-9*  | SIPA1L1      | 0.32  |
| hsa-mir-9*  | SLC1A2       | 0.38  |
| hsa-mir-9*  | SLC4A3       | 0.41  |
| hsa-mir-9*  | ST8SIA5      | 0.33  |
| hsa-mir-9*  | SYTL2        | 0.23  |
| hsa-mir-9*  | TRIM47       | 0.41  |
| hsa-mir-9*  | TSPAN7       | 0.38  |
| hsa-mir-9*  | VPS54        | -0.45 |
| hsa-mir-9*  | ZDHHC22      | 0.41  |
| hsa-mir-92b | ARPC1B       | -0.51 |
| hsa-mir-92b | C1orf165     | 0.50  |
| hsa-mir-92b | C1orf21      | 0.51  |
| hsa-mir-92b | CYP2J2       | 0.49  |
| hsa-mir-92b | ECSIT        | 0.30  |
| hsa-mir-92b | EYA2         | 0.55  |
| hsa-mir-98  | B3GAT1       | 0.41  |
| hsa-mir-99a | ASRGL1       | 0.47  |
| hsa-mir-99a | MON1A        | 0.45  |
| hsa-mir-99a | SERPINE1     | -0.48 |
| hsa-mir-99a | hCG_31916    | -0.51 |

**Supplementary Table 5. miR and mRNA nodes in regions of gain or loss in the 8 miR CLR network**

| 2699 total edges<br>(8 miRNA-1317 mRNA)<br><br>15 putative direct targets<br>(2 miRNA-15 mRNA) | <b>All mRNA nodes</b>                                                                 | <b>mRNA nodes with gain</b>                                     | <b>mRNA nodes with gain and correlated expression</b>         | <b>mRNA nodes with loss</b>                                     | <b>mRNA nodes with loss and correlated expression</b>           |
|------------------------------------------------------------------------------------------------|---------------------------------------------------------------------------------------|-----------------------------------------------------------------|---------------------------------------------------------------|-----------------------------------------------------------------|-----------------------------------------------------------------|
| <b>(A)<br/>miRNA nodes with gain</b>                                                           | 399 edges<br>(2 miRNA-304 mRNA)<br><br>No putative direct targets                     | 34 edges<br>(2 miRNA-28 mRNA)<br><br>No putative direct targets | 9 edges<br>(2 miRNA-7mRNA)<br><br>No putative direct targets  | 16 edges<br>(2 miRNA-12 mRNA)<br><br>No putative direct targets | 7 edges<br>(2 miRNA-6 mRNA)<br><br>No putative direct targets   |
| <b>(B)<br/>miRNA nodes with gain correlated with expression</b>                                | 399 edges<br>(2 miRNA-304 mRNA)<br><br>No putative direct targets                     | 34 edges<br>(2 miRNA-28 mRNA)<br><br>No putative direct targets | 9 edges<br>(2 miRNA-7mRNA)<br><br>No putative direct targets  | 16 edges<br>(2 miRNA-12 mRNA)<br><br>No putative direct targets | 7 edges<br>(2 miRNA-6 mRNA)<br><br>No putative direct targets   |
| <b>(C)<br/>miRNA nodes with loss</b>                                                           | 342 edges<br>(1 miRNA-342 mRNA)<br><br>miR-34a:DCX<br>miR-34a:PDGFRA<br>miR-34a: SOX4 | 21 edges<br>(1 miRNA-21 mRNA)<br><br>miR-34a:PDGFRA             | 6 edges<br>(1 miRNA-6 mRNA)<br><br>miR-34a:PDGFRA             | 29 edges<br>(1 miRNA-29 mRNA)<br><br>No putative direct targets | 16 edges<br>(1 miRNA-16 mRNA)<br><br>No putative direct targets |
| <b>(D)<br/>miRNA nodes with loss correlated with expression</b>                                | 0 edges<br>(0 miRNA-0 mRNA)<br><br>No putative direct targets                         | 0 edges<br>(0 miRNA-0 mRNA)<br><br>No putative direct targets   | 0 edges<br>(0 miRNA-0 mRNA)<br><br>No putative direct targets | 0 edges<br>(0 miRNA-0 mRNA)<br><br>No putative direct targets   | 0 edges<br>(0 miRNA-0 mRNA)<br><br>No putative direct targets   |

**Supplementary Table 6. Survival Analysis Results for the 8 Discriminatory miRs**

|             | <b>log2-exp</b>    | <b>log2-exp</b> | <b>log2-exp</b> | <b>log2-exp</b> | <b>dichotomized</b> | <b>dichotomized</b> | <b>dichotomized</b>          |
|-------------|--------------------|-----------------|-----------------|-----------------|---------------------|---------------------|------------------------------|
| <b>miRs</b> | <b>HazardRatio</b> | <b>Wald_P</b>   | <b>FDR</b>      | <b>C_index</b>  | <b>HazardRatio</b>  | <b>logrank_P</b>    | <b>Bonferroni-adjusted_P</b> |
| miR-34a     | 1.19               | 0.002036        | 0.02            | 0.55            | 2.2                 | 2.20E-05            | 0.0047                       |
| miR-181d    | 0.81               | 0.04            | 0.2             | 0.46            | 0.63                | 0                   | 0.46                         |
| miR-9       | 0.89               | 0.03            | 0.2             | 0.46            | 0.65                | 0                   | 0.57                         |
| miR-181c    | 0.81               | 0.03            | 0.2             | 0.46            | 0.69                | 0.01                | 1.0                          |
| miR-22      | 1.17               | 0.07            | 0.27            | 0.52            | 1.6                 | 0.02                | 1.0                          |
| miR-142-3p  | 1.12               | 0.12            | 0.35            | 0.52            | 1.4                 | 0.03                | 1.0                          |

## Supplementary Table 7. Multivariate Regression Analysis

Multivariate Cox regression analysis to correct the possible confounding effect of selected clinical variables in 271 GBM tumors.

**Low miR34a is significantly associated with better survival (adjusted P=0.0016) after correction.**

| <b>Variables</b>                 | <b>HazardRatio</b> | <b>P value</b> |
|----------------------------------|--------------------|----------------|
| miR34a (continuous log-2 levels) | 1.2                | 0.0016         |
| Primary vs Secondary GBM         | 1.7                | 0.066          |
| Neoadjuvant therapy vs Not       | 1.79               | 1.90E-5        |
| Male vs Female                   | 0.8                | 0.09           |

Multivariate Cox regression analysis to correct the possible confounding effect of selected clinical variables in 72 Proneural GBM tumors.

**Low miR34a is significantly associated with better survival (adjusted P=0.0019) after correction.**

| <b>Variables</b>           | <b>HazardRatio</b> | <b>P value</b> |
|----------------------------|--------------------|----------------|
| miR34a                     | 1.6                | 0.0019         |
| Primary vs Secondary GBM   | 1.23               | 0.68           |
| Neoadjuvant therapy vs Not | 2.3                | 0.0037         |
| Male vs Female             | 1.17               | 0.55           |

Multivariate Cox analysis on the batch effects in 271 GBM tumors.

**No batches have P value < 0.05**

| <b>Batch numbers</b> | <b>HazardRatio</b> | <b>P value</b> |
|----------------------|--------------------|----------------|
| 16.19.0              | 1.13               | 0.65           |
| 2.34.0               | 0.594              | 0.11           |
| 3.32.0               | 1.281              | 0.46           |
| 4.32.0               | 0.989              | 0.97           |
| 5.29.0               | 1.396              | 0.17           |
| 6.34.0               | 0.842              | 0.52           |
| 7.28.0               | 1.803              | 0.067          |
| 8.28.0               | 1.105              | 0.74           |

Multivariate Cox analysis to correct the confounding of batch effects on mir34a in 271 GBM tumors.

**Low miR34a is significantly associated with better survival (adjusted P=0.0087) after correction.**

| <b>Batch numbers</b> | <b>HazardRatio</b> | <b>P value</b> |
|----------------------|--------------------|----------------|
| miR34a               | 1.167              | 0.0087         |

|                |              |             |
|----------------|--------------|-------------|
| <b>16.19.0</b> | <b>0.992</b> | <b>0.98</b> |
| <b>2.34.0</b>  | <b>0.583</b> | <b>0.1</b>  |
| <b>3.32.0</b>  | <b>1.158</b> | <b>0.66</b> |
| <b>4.32.0</b>  | <b>1.034</b> | <b>0.91</b> |
| <b>5.29.0</b>  | <b>1.247</b> | <b>0.37</b> |
| <b>6.34.0</b>  | <b>0.773</b> | <b>0.34</b> |
| <b>7.28.0</b>  | <b>1.63</b>  | <b>0.13</b> |
| <b>8.28.0</b>  | <b>0.99</b>  | <b>0.97</b> |



**Supplementary Table 8: Patients characteristics**

|                     |                      |
|---------------------|----------------------|
| <b>Age (Years)</b>  | <b>mean (y) ± SD</b> |
|                     | <b>53.8 ±12.8</b>    |
| <b>Gender</b>       | <b>M:F</b>           |
|                     | <b>132:88</b>        |
| <b>Chemotherapy</b> | <b>n= (%)</b>        |
|                     | <b>87 (39.4)</b>     |
| <b>Radiotherapy</b> | <b>n= (%)</b>        |
|                     | <b>186 (84.2)</b>    |
| <b>TOTAL</b>        | <b>220 patients</b>  |

**Supplementary table 9**

| Identifier  | Row | Column | Spot # | miR34a in Tumor Mask AQUA | Tumor Mask %Area |
|-------------|-----|--------|--------|---------------------------|------------------|
| 297/99/1    | 25  | 1      | 361    |                           |                  |
| 297/99/2    | 24  | 1      | 360    | 14844.16                  | 62.3476          |
| 297/99/3    | 23  | 1      | 331    | 17619.2                   | 34.14042         |
| 287/99a/1   | 22  | 1      | 330    | 14578.02                  | 20.98243         |
| 287/99a/2   | 21  | 1      | 301    | 9058.004                  | 2.371632         |
| 287/99a/3   | 20  | 1      | 300    | 14838.55                  | 15.68083         |
| 776/94 la/: | 19  | 1      | 271    | 2731.252                  | 47.58721         |
| 154/97a/1   | 18  | 1      | 270    | 12628.11                  | 33.2445          |
| 154/97a/2   | 17  | 1      | 241    | 13879.11                  | 48.75622         |
| 154/97a/3   | 16  | 1      | 240    | 17996.25                  | 65.46057         |
| 269/87/1    | 15  | 1      | 211    | 17458.64                  | 62.8292          |
|             | 14  | 1      | 210    |                           |                  |
| 269/87/2    | 13  | 1      | 181    | 15245.33                  | 60.13033         |
| 269/87/3    | 12  | 1      | 180    |                           |                  |
| 235/91/1    | 11  | 1      | 151    | 16561.49                  | 50.56924         |
| 235/91/2    | 10  | 1      | 150    |                           |                  |
| 700/94/1    | 9   | 1      | 121    |                           |                  |
| 700/94/2    | 8   | 1      | 120    |                           |                  |
| 700/94/3    | 7   | 1      | 91     |                           |                  |
| 819/94/1    | 6   | 1      | 90     |                           |                  |
| 819/94/2    | 5   | 1      | 61     | 4647.494                  | 13.65755         |
| 1103/97a/:  | 4   | 1      | 60     | 18695.96                  | 8.17161          |
| 1103/97a/:  | 3   | 1      | 31     | 14352.37                  | 6.016813         |
| 1103/97a/:  | 2   | 1      | 30     |                           |                  |
| 666/96/1    | 1   | 1      | 1      |                           |                  |
| 666/96/2    | 25  | 2      | 362    | 6128.968                  | 55.42277         |
| 666/96/3    | 24  | 2      | 359    | 6350.603                  | 40.24793         |
| 577/98/1    | 23  | 2      | 332    | 17563.46                  | 22.73081         |
| 577/98/2    | 22  | 2      | 329    | 10081.88                  | 46.54126         |
| 577/98/3    | 21  | 2      | 302    | 15388.72                  | 59.19003         |
| 715/88/1    | 20  | 2      | 299    |                           |                  |
| 715/88/2    | 19  | 2      | 272    | 9250.036                  | 42.68811         |
| 715/98/3    | 18  | 2      | 269    | 8282.42                   | 13.37922         |
| 548/03/1    | 17  | 2      | 242    | 9978.785                  | 45.15408         |
| 746/98o/1   | 16  | 2      | 239    | 20353.62                  | 38.19914         |
| 746/98o/2   | 15  | 2      | 212    | 17431.31                  | 54.51015         |
|             | 14  | 2      | 209    |                           |                  |
| 746/98o/3   | 13  | 2      | 182    | 12442.18                  | 50.64904         |
| 884/91a/1   | 12  | 2      | 179    | 6019.793                  | 42.67393         |
| 884/91a/2   | 11  | 2      | 152    | 7523.675                  | 44.65606         |
| 884/91a/3   | 10  | 2      | 149    | 6219.566                  | 45.0849          |
| 788/98/1    | 9   | 2      | 122    | 19998.5                   | 16.20619         |
| 825/98/1    | 8   | 2      | 119    | 21088.19                  | 54.06243         |
| 825/98/2    | 7   | 2      | 92     | 20178.22                  | 24.47108         |

|             |    |   |     |          |          |
|-------------|----|---|-----|----------|----------|
| 825/98/3    | 6  | 2 | 89  |          |          |
|             | 5  | 2 | 62  |          |          |
|             | 4  | 2 | 59  |          |          |
|             | 3  | 2 | 32  |          |          |
|             | 2  | 2 | 29  |          |          |
|             | 1  | 2 | 2   |          |          |
| 663/99/1    | 25 | 3 | 363 | 18051.26 | 25.31935 |
| 663/99/2    | 24 | 3 | 358 | 13225.92 | 45.69865 |
| 663/99/3    | 23 | 3 | 333 | 5609.798 | 39.68303 |
| 63/99b/1    | 22 | 3 | 328 | 14954.89 | 22.79244 |
| 63/99b/2    | 21 | 3 | 303 |          |          |
| 63/99b/3    | 20 | 3 | 298 | 18201.94 | 34.53411 |
| 1038/97a/:  | 19 | 3 | 273 | 12185.52 | 52.82885 |
| 1038/97a/:  | 18 | 3 | 268 | 9789.598 | 7.921931 |
| 91/99 I/1   | 17 | 3 | 243 | 13706.45 | 66.60715 |
| 91/99 I/2   | 16 | 3 | 238 |          |          |
| 91/99 I/3   | 15 | 3 | 213 | 11627.8  | 67.31091 |
|             | 14 | 3 | 208 |          |          |
| 112/99/1    | 13 | 3 | 183 | 16975.68 | 27.94352 |
| 112/99/2    | 12 | 3 | 178 | 15602.23 | 51.75034 |
| 181/99b/1   | 11 | 3 | 153 | 27369.32 | 8.321291 |
| 181/99b/2   | 10 | 3 | 148 | 19743.77 | 3.304799 |
| 181/99b/3   | 9  | 3 | 123 | 14401.23 | 48.37796 |
| 362/99 II/1 | 8  | 3 | 118 | 16239.36 | 58.93832 |
| 362/99 II/2 | 7  | 3 | 93  | 13369.63 | 60.78845 |
| 362/99 II/3 | 6  | 3 | 88  | 16056.34 | 72.56254 |
| 754/99/1    | 5  | 3 | 63  | 21028.86 | 57.31783 |
| 754/99/2    | 4  | 3 | 58  | 21769.19 | 63.97305 |
| 668/00a/1   | 3  | 3 | 33  | 18531.93 | 13.5282  |
| 668/00a/2   | 2  | 3 | 28  |          |          |
| 668/00a/3   | 1  | 3 | 3   |          |          |
| 246/01 Ia/: | 25 | 4 | 364 | 22041.59 | 11.95669 |
| 246/01 Ia/: | 24 | 4 | 357 | 22048.71 | 16.70617 |
| 246/01 Ia/: | 23 | 4 | 334 |          |          |
| 354/01/1    | 22 | 4 | 327 |          |          |
| 354/01/2    | 21 | 4 | 304 | 22663.64 | 32.9851  |
| 354/01/3    | 20 | 4 | 297 | 18806.51 | 37.21321 |
| 462/01b/1   | 19 | 4 | 274 | 14102.1  | 59.52643 |
| 462/01b/2   | 18 | 4 | 267 | 14611.47 | 55.05653 |
| 462/01b/3   | 17 | 4 | 244 | 16700.17 | 61.47334 |
| 533/01 Ia/: | 16 | 4 | 237 | 19569.15 | 32.11937 |
| 533/01 Ia/: | 15 | 4 | 214 | 17257.19 | 44.40162 |
|             | 14 | 4 | 207 |          |          |
| 533/01 Ia/: | 13 | 4 | 184 | 15394.57 | 46.28263 |
| 504/03/1    | 12 | 4 | 177 | 14732.75 | 19.4947  |
| 504/03/2    | 11 | 4 | 154 | 7845.544 | 31.01961 |
| 436/04all/: | 10 | 4 | 147 | 18465.72 | 40.21048 |

|             |    |   |     |          |          |
|-------------|----|---|-----|----------|----------|
| 436/04aII/: | 9  | 4 | 124 | 17915.41 | 37.88902 |
| 436/04aII/: | 8  | 4 | 117 |          |          |
| 993/99/1    | 7  | 4 | 94  | 16284.59 | 20.97649 |
| 993/99/2    | 6  | 4 | 87  | 11792.56 | 60.61347 |
| 797/00b/1   | 5  | 4 | 64  | 23844.27 | 47.49909 |
| 797/00b/2   | 4  | 4 | 57  | 22218.43 | 11.85012 |
| 797/00b/3   | 3  | 4 | 34  |          |          |
| 820/00/1    | 2  | 4 | 27  | 20885.95 | 28.10306 |
| 820/00/2    | 1  | 4 | 4   |          |          |
| 821/00/1    | 25 | 5 | 365 | 5392.744 | 30.87705 |
| 891/00 a-c, | 24 | 5 | 356 | 18244.38 | 50.15492 |
| 891/00 a-c, | 23 | 5 | 335 | 16419.39 | 50.04228 |
| 891/00 a-c, | 22 | 5 | 326 | 19965.38 | 64.65312 |
| 493/01/1    | 21 | 5 | 305 | 17782.34 | 14.51609 |
| 493/01/2    | 20 | 5 | 296 | 17365.92 | 45.86874 |
| 493/01/3    | 19 | 5 | 275 | 5865.93  | 61.01402 |
| 262/01b/1   | 18 | 5 | 266 | 22705.71 | 30.75239 |
| 261/01b/2   | 17 | 5 | 245 | 22392.93 | 46.83342 |
| 261/01b/3   | 16 | 5 | 236 | 26076.22 | 14.76017 |
| 512/02 II/1 | 15 | 5 | 215 | 18974.46 | 43.62086 |
|             | 14 | 5 | 206 |          |          |
| 738/98/1    | 13 | 5 | 185 | 16055.29 | 13.10851 |
| 741/98a/1   | 12 | 5 | 176 | 18460.35 | 59.39953 |
| 741/98a/2   | 11 | 5 | 155 | 24365.55 | 3.701364 |
| 946/98b/1   | 10 | 5 | 146 | 26202.31 | 3.768658 |
| 946/98b/2   | 9  | 5 | 125 | 24593    | 23.14408 |
| 946/98b/3   | 8  | 5 | 116 | 25933.32 | 28.14086 |
| 590/96/1    | 7  | 5 | 95  | 16606.68 | 21.05294 |
| 590/96 IIa/ | 6  | 5 | 86  | 14791.42 | 28.97725 |
| 590/96 IIa/ | 5  | 5 | 65  | 10960.21 | 11.79988 |
| 590/96/2    | 4  | 5 | 56  | 9485.935 | 55.09846 |
| 244/96/1    | 3  | 5 | 35  | 20315.48 | 48.66398 |
| 244/96/2    | 2  | 5 | 26  |          |          |
|             | 1  | 5 | 5   |          |          |
| 244/96/3    | 25 | 6 | 366 | 17733.57 | 14.55452 |
| 173/97/1    | 24 | 6 | 355 | 14988.1  | 47.11531 |
| 173/97/2    | 23 | 6 | 336 | 18552.54 | 62.60412 |
| 173/97/3    | 22 | 6 | 325 | 15751.22 | 29.70518 |
| 22/00/1     | 21 | 6 | 306 | 17517.43 | 57.25039 |
| 22/00/2     | 20 | 6 | 295 | 17379.96 | 61.60645 |
| 22/00/3     | 19 | 6 | 276 | 18317.37 | 70.00643 |
| 762/98b/1   | 18 | 6 | 265 | 22438.48 | 54.25648 |
| 762/98b/2   | 17 | 6 | 246 | 25138.47 | 60.31593 |
| 762/98b/3   | 16 | 6 | 235 | 24134.67 | 60.49118 |
| 537/96c/1   | 15 | 6 | 216 | 17058.35 | 29.6237  |
|             | 14 | 6 | 205 |          |          |
| 537/96c/2   | 13 | 6 | 186 | 17081.96 | 65.81724 |

|             |    |   |     |          |          |
|-------------|----|---|-----|----------|----------|
| 537/96c/3   | 12 | 6 | 175 | 14562.78 | 55.00028 |
| 987/96b/1   | 11 | 6 | 156 |          |          |
| 1058/96a/:  | 10 | 6 | 145 | 12702.83 | 23.81631 |
| 1058/96a/:  | 9  | 6 | 126 | 13482.21 | 32.36576 |
| 1058/96b/:  | 8  | 6 | 115 | 5747.343 | 54.9109  |
| 845/97b/1   | 7  | 6 | 96  | 16433.51 | 43.47523 |
| 845/97b/2   | 6  | 6 | 85  | 19253.06 | 51.46111 |
| 1080/96a/:  | 5  | 6 | 66  | 17018.52 | 5.091542 |
| 1080/96a/:  | 4  | 6 | 55  | 20919.38 | 40.3336  |
| 1080/96a/:  | 3  | 6 | 36  | 21384.36 | 38.9558  |
|             | 2  | 6 | 25  |          |          |
|             | 1  | 6 | 6   |          |          |
| 840/97/1    | 25 | 7 | 367 |          |          |
| 550/98 II/1 | 24 | 7 | 354 | 8518.482 | 61.48542 |
| 14/96 IIa/1 | 23 | 7 | 337 | 16211.64 | 23.21186 |
| 14/96 IIa/2 | 22 | 7 | 324 | 17294.62 | 36.02268 |
| 14/96 IIa/3 | 21 | 7 | 307 | 12455.16 | 27.59608 |
| 893/94 Ia/: | 20 | 7 | 294 | 22420.8  | 18.00509 |
| 893/94 Ia/: | 19 | 7 | 277 | 25355.26 | 5.398102 |
| 893/94 Ia/: | 18 | 7 | 264 | 24320.76 | 1.508134 |
| 968/95/1    | 17 | 7 | 247 | 8312.281 | 55.10712 |
| 940/98/1    | 16 | 7 | 234 | 22672.61 | 9.781977 |
| 940/98/2    | 15 | 7 | 217 |          |          |
|             | 14 | 7 | 204 |          |          |
| 940/98/3    | 13 | 7 | 187 | 23583.01 | 26.07502 |
| 104/97/1    | 12 | 7 | 174 | 21824.97 | 14.48017 |
| 104/97/2    | 11 | 7 | 157 | 24093.22 | 72.33418 |
| 104/97/3    | 10 | 7 | 144 |          |          |
| 863/98/1    | 9  | 7 | 127 | 23723.35 | 5.882505 |
| 863/98/2    | 8  | 7 | 114 | 22053.98 | 76.65481 |
| 869/98b/1   | 7  | 7 | 97  | 14528.72 | 64.61524 |
| 354/98b/1   | 6  | 7 | 84  |          |          |
| 354/98b/2   | 5  | 7 | 67  | 17839.74 | 20.87384 |
| 354/98b/3   | 4  | 7 | 54  | 12514.55 | 4.865133 |
| 219/97/1    | 3  | 7 | 37  | 15203.19 | 5.78719  |
|             | 2  | 7 | 24  |          |          |
|             | 1  | 7 | 7   |          |          |
|             | 25 | 8 | 368 |          |          |
|             | 24 | 8 | 353 |          |          |
|             | 23 | 8 | 338 |          |          |
|             | 22 | 8 | 323 |          |          |
|             | 21 | 8 | 308 |          |          |
|             | 20 | 8 | 293 |          |          |
|             | 19 | 8 | 278 |          |          |
|             | 18 | 8 | 263 |          |          |
|             | 17 | 8 | 248 |          |          |
|             | 16 | 8 | 233 |          |          |

|            |    |    |     |          |          |
|------------|----|----|-----|----------|----------|
|            | 15 | 8  | 218 |          |          |
|            | 14 | 8  | 203 | 4628.12  | 2.523899 |
|            | 13 | 8  | 188 | 17793.71 | 100      |
|            | 12 | 8  | 173 | 23979.13 | 64.16522 |
|            | 11 | 8  | 158 |          |          |
|            | 10 | 8  | 143 | 14024.87 | 38.60744 |
|            | 9  | 8  | 128 |          |          |
|            | 8  | 8  | 113 |          |          |
|            | 7  | 8  | 98  |          |          |
|            | 6  | 8  | 83  |          |          |
|            | 5  | 8  | 68  |          |          |
|            | 4  | 8  | 53  |          |          |
|            | 3  | 8  | 38  |          |          |
|            | 2  | 8  | 23  |          |          |
|            | 1  | 8  | 8   |          |          |
| 219/97/2   | 25 | 9  | 369 | 18800.09 | 36.10507 |
| 133/98c/1  | 24 | 9  | 352 | 5759.441 | 26.1651  |
| 432/98a/1  | 23 | 9  | 339 | 22047.21 | 62.92053 |
| 432/98a/2  | 22 | 9  | 322 |          |          |
| 432/98a/3  | 21 | 9  | 309 | 16446.38 | 61.1855  |
| 1006/96a/: | 20 | 9  | 292 | 13917.09 | 52.41398 |
| 1006/96a/: | 19 | 9  | 279 | 13752.83 | 50.08204 |
| 1007/96a/: | 18 | 9  | 262 |          |          |
| 1007/96a/: | 17 | 9  | 249 | 22025.25 | 54.87967 |
| 11/96al/1  | 16 | 9  | 232 | 22812.47 | 69.67751 |
| 11/96al/2  | 15 | 9  | 219 | 19956.01 | 16.50534 |
|            | 14 | 9  | 202 |          |          |
| 11/96al/3  | 13 | 9  | 189 | 7935.303 | 35.45198 |
| 424/98a/1  | 12 | 9  | 172 | 23686.56 | 65.70494 |
| 424/98a/2  | 11 | 9  | 159 | 27062.09 | 57.73494 |
| 424/98a/3  | 10 | 9  | 142 |          |          |
| 920/95/1   | 9  | 9  | 129 | 7979.158 | 17.51768 |
| 920/95/2   | 8  | 9  | 112 | 16157.55 | 11.00465 |
| 920/95/3   | 7  | 9  | 99  | 15828.39 | 32.92731 |
| 84/95b/1   | 6  | 9  | 82  |          |          |
| 84/95b/2   | 5  | 9  | 69  |          |          |
| 84/95b/3   | 4  | 9  | 52  | 18051.42 | 56.35377 |
| 871/95/1   | 3  | 9  | 39  | 21876.81 | 28.2809  |
|            | 2  | 9  | 22  |          |          |
|            | 1  | 9  | 9   |          |          |
| 871/95/2   | 25 | 10 | 370 | 19297.57 | 27.28065 |
| 871/95/3   | 24 | 10 | 351 | 17953.41 | 15.02634 |
| 634/96/1   | 23 | 10 | 340 | 15540.26 | 40.09112 |
| 634/96/2   | 22 | 10 | 321 | 16792.68 | 40.61654 |
| 634/96/3   | 21 | 10 | 310 | 13712.13 | 63.88144 |
| 203/96A/1  | 20 | 10 | 291 | 21767.57 | 16.698   |
| 203/96A/2  | 19 | 10 | 280 |          |          |

|             |    |    |     |          |          |
|-------------|----|----|-----|----------|----------|
| 203/96A/3   | 18 | 10 | 261 | 28691.56 | 20.248   |
| 203/96a/1   | 17 | 10 | 250 | 21501.29 | 33.52492 |
| 203/96a/2   | 16 | 10 | 231 | 17005.69 | 42.94751 |
| 203/96a/3   | 15 | 10 | 220 |          |          |
|             | 14 | 10 | 201 |          |          |
| 159/95III/1 | 13 | 10 | 190 | 14447.54 | 32.07891 |
| 512/95/1    | 12 | 10 | 171 | 23513.24 | 41.03435 |
| 512/95/2    | 11 | 10 | 160 | 25137.68 | 34.18179 |
| 512/95/3    | 10 | 10 | 141 | 23593.47 | 43.8456  |
| 754/95/1    | 9  | 10 | 130 | 20901.12 | 34.89812 |
| 754/95/2    | 8  | 10 | 111 | 22756.97 | 61.28934 |
| 754/95/3    | 7  | 10 | 100 | 21504.96 | 47.77644 |
| 385/96a1/:  | 6  | 10 | 81  | 30083.21 | 9.539915 |
| 385/96a+a   | 5  | 10 | 70  | 11050.58 | 25.36316 |
| 389/97a/1   | 4  | 10 | 51  |          |          |
| 389/97a/2   | 3  | 10 | 40  |          |          |
|             | 2  | 10 | 21  |          |          |
|             | 1  | 10 | 10  |          |          |
| 702/97/1    | 25 | 11 | 371 | 14524.9  | 20.15136 |
| 702/97/2    | 24 | 11 | 350 | 14690.41 | 12.1912  |
| 702/97/3    | 23 | 11 | 341 | 14655.25 | 31.22617 |
| 389/97b/1   | 22 | 11 | 320 | 12747.99 | 33.4818  |
| 389/97b/2   | 21 | 11 | 311 | 14800.36 | 58.56161 |
| 1088/96/1   | 20 | 11 | 290 | 9431.442 | 45.79124 |
| 1088/96/2   | 19 | 11 | 281 | 11871.38 | 1.4407   |
| 1088/96/3   | 18 | 11 | 260 | 11663.76 | 49.79644 |
| 912/97IIa/: | 17 | 11 | 251 |          |          |
| 170/95/1    | 16 | 11 | 230 | 11608.12 | 5.732614 |
| 170/95/1.1  | 15 | 11 | 221 |          |          |
|             | 14 | 11 | 200 |          |          |
| 654/98/1    | 13 | 11 | 191 | 18286.08 | 42.4506  |
| 654/98/2    | 12 | 11 | 170 | 15575.21 | 3.063786 |
| 654/98/3    | 11 | 11 | 161 | 19767.05 | 42.91222 |
| 136/01/1    | 10 | 11 | 140 | 12691.37 | 72.14061 |
| 136/01/2    | 9  | 11 | 131 | 11135.67 | 71.30017 |
| 136/01/3    | 8  | 11 | 110 | 13478.72 | 60.58817 |
| 387/01/1    | 7  | 11 | 101 | 23296.9  | 20.30719 |
| 387/01/2    | 6  | 11 | 80  | 20148.38 | 35.97202 |
| 387/01/3    | 5  | 11 | 71  | 26592.62 | 2.602024 |
| 434/01/1    | 4  | 11 | 50  | 17349.13 | 49.16033 |
| 434/01/2    | 3  | 11 | 41  |          |          |
|             | 2  | 11 | 20  |          |          |
|             | 1  | 11 | 11  |          |          |
| 434/01/3    | 25 | 12 | 372 | 12888.78 | 45.40879 |
| 937/98a/1   | 24 | 12 | 349 | 17805.79 | 18.72429 |
| 937/98a/2   | 23 | 12 | 342 | 18546.6  | 28.30857 |
| 937/98a/3   | 22 | 12 | 319 | 13295.17 | 37.95918 |

|             |    |    |     |          |          |
|-------------|----|----|-----|----------|----------|
| 122/97/1    | 21 | 12 | 312 | 16167.46 | 61.90777 |
| 122/97/2    | 20 | 12 | 289 | 14959.97 | 50.32724 |
| 122/97/3    | 19 | 12 | 282 | 12480.84 | 54.75871 |
| 733/97/1    | 18 | 12 | 259 | 20464.3  | 25.44911 |
| 733/97/2    | 17 | 12 | 252 | 20632.43 | 32.86945 |
| 733/97/3    | 16 | 12 | 229 | 19867.05 | 55.95406 |
| 44/97/1     | 15 | 12 | 222 | 10436.62 | 39.11114 |
|             | 14 | 12 | 199 |          |          |
| 44/97/2     | 13 | 12 | 192 | 17999.68 | 2.43648  |
| 1017/96/1   | 12 | 12 | 169 | 17583.3  | 60.16065 |
| 1017/96/2   | 11 | 12 | 162 | 22409.52 | 59.09436 |
| 1017/96/3   | 10 | 12 | 139 | 22505.92 | 59.29289 |
| 964/96/1    | 9  | 12 | 132 | 22781.39 | 54.84913 |
| 959/96/1    | 8  | 12 | 109 | 17211.16 | 44.51685 |
| 959/96/2    | 7  | 12 | 102 |          |          |
| 959/96/3    | 6  | 12 | 79  | 7564.555 | 12.89922 |
| 758/96/1    | 5  | 12 | 72  | 15250.92 | 47.03188 |
| 758/96/2    | 4  | 12 | 49  | 22807.19 | 12.60873 |
| 758/96/3    | 3  | 12 | 42  |          |          |
|             | 2  | 12 | 19  |          |          |
|             | 1  | 12 | 12  |          |          |
| 678/99a/1   | 25 | 13 | 373 | 7298.486 | 68.49397 |
| 678/99a/2   | 24 | 13 | 348 | 6759.044 | 59.82376 |
| 678/99a/3   | 23 | 13 | 343 | 10531.14 | 59.97254 |
| 680/96/1    | 22 | 13 | 318 | 8376.229 | 20.5366  |
| 213/98b/1   | 21 | 13 | 313 | 18181.42 | 62.28009 |
| 213/98c/1   | 20 | 13 | 288 |          |          |
| 466/01b/1   | 19 | 13 | 283 | 17690.93 | 35.75539 |
| 466/01b/2   | 18 | 13 | 258 | 19330.65 | 34.11421 |
| 466/01b/3   | 17 | 13 | 253 | 15773.89 | 49.82607 |
| 164/93/1    | 16 | 13 | 228 | 16219.17 | 57.85128 |
| 164/93/2    | 15 | 13 | 223 | 11776.25 | 55.42997 |
|             | 14 | 13 | 198 |          |          |
| 164/93/3    | 13 | 13 | 193 |          |          |
| 659/96/1    | 12 | 13 | 168 | 10671.79 | 64.21085 |
| 659/96/2    | 11 | 13 | 163 | 11660.84 | 67.41077 |
| 1109/96 I/: | 10 | 13 | 138 | 14483.66 | 50.04472 |
| 1109/96 I/: | 9  | 13 | 133 | 13436.12 | 68.78159 |
| 1109/96 I/: | 8  | 13 | 108 | 11079.68 | 72.03355 |
| 468/98 Ia/: | 7  | 13 | 103 | 17965.36 | 45.41396 |
| 468/98 Ia/: | 6  | 13 | 78  | 12419.74 | 49.38974 |
| 468/98 Ia/: | 5  | 13 | 73  |          |          |
| 820/96/1    | 4  | 13 | 48  | 9758.704 | 45.18378 |
| 820/96/2    | 3  | 13 | 43  | 13550.85 | 22.9995  |
|             | 2  | 13 | 18  |          |          |
|             | 1  | 13 | 13  |          |          |
| 820/96/3    | 25 | 14 | 374 | 6188.269 | 20.30971 |



|            |    |    |     |          |          |
|------------|----|----|-----|----------|----------|
| 201/97/1   | 24 | 14 | 347 | 11391.54 | 30.60425 |
| 201/97/2   | 23 | 14 | 344 | 12035.06 | 2.657717 |
| 201/97/3   | 22 | 14 | 317 | 9458.599 | 16.12009 |
| 256/97b/1  | 21 | 14 | 314 | 14386.9  | 30.03033 |
| 256/97b/2  | 20 | 14 | 287 |          |          |
| 901/97/1   | 19 | 14 | 284 | 20252.45 | 43.66391 |
| 901/97/2   | 18 | 14 | 257 | 22619.17 | 53.92435 |
| 901/97/3   | 17 | 14 | 254 | 24144.51 | 64.80392 |
| 259/97 l/1 | 16 | 14 | 227 | 20983.83 | 40.24604 |
| 259/97 l/2 | 15 | 14 | 224 | 20496.48 | 56.78653 |
|            | 14 | 14 | 197 |          |          |
| 259/97 l/3 | 13 | 14 | 194 | 18978.85 | 30.95385 |
| 860/97/1   | 12 | 14 | 167 | 13429.52 | 42.63186 |
| 860/97/2   | 11 | 14 | 164 | 17087.49 | 43.18489 |
| 860/97/3   | 10 | 14 | 137 | 13434.12 | 5.12187  |
| 852/97a/1  | 9  | 14 | 134 | 21945.44 | 53.56321 |
| 852/97a/2  | 8  | 14 | 107 | 21207.85 | 12.12195 |
| 852/97a/3  | 7  | 14 | 104 | 17112.66 | 50.36561 |
| 814/97/1   | 6  | 14 | 77  | 17310.82 | 39.25921 |
| 814/97/2   | 5  | 14 | 74  | 19075.48 | 48.01047 |
| 814/97/3   | 4  | 14 | 47  | 17034.38 | 35.76916 |
| 786/97a+l/ | 3  | 14 | 44  | 34532.57 | 14.72712 |
|            | 2  | 14 | 17  |          |          |
|            | 1  | 14 | 14  |          |          |
| 786/97a+l/ | 25 | 15 | 375 | 16456.04 | 64.27312 |
| 786/97a+l/ | 24 | 15 | 346 | 12633.01 | 73.67223 |
| 774/97/1   | 23 | 15 | 345 |          |          |
| 777/97al/1 | 22 | 15 | 316 | 5630.048 | 24.28912 |
| 760/97/1   | 21 | 15 | 315 | 2175.685 | 1.111569 |
| 760/97/2   | 20 | 15 | 286 |          |          |
| 760/97/3   | 19 | 15 | 285 | 3988.707 | 2.056756 |
| 753/97a/1  | 18 | 15 | 256 | 14351.68 | 10.45387 |
| 753/97b/1  | 17 | 15 | 255 | 4911.207 | 2.034674 |
| 753/97b/2  | 16 | 15 | 226 | 6244.91  | 0.152756 |
| 738/97/1   | 15 | 15 | 225 | 14148.23 | 29.93781 |
|            | 14 | 15 | 196 |          |          |
| Pat NH1/1  | 13 | 15 | 195 |          |          |
| Pat NH1/2  | 12 | 15 | 166 |          |          |
| Pat NH1/3  | 11 | 15 | 165 |          |          |
| Pat3NH/1   | 10 | 15 | 136 | 10312.11 | 27.86903 |
| Pat3NH/2   | 9  | 15 | 135 | 12391.04 | 25.51424 |
| Pat5NH/1   | 8  | 15 | 106 | 12761.06 | 1.571305 |
| Pat5NH/2   | 7  | 15 | 105 |          |          |
| Pat5NH/3   | 6  | 15 | 76  | 3027.722 | 3.874385 |
|            | 5  | 15 | 75  |          |          |
|            | 4  | 15 | 46  |          |          |
|            | 3  | 15 | 45  |          |          |

|              |    |    |     |          |          |
|--------------|----|----|-----|----------|----------|
|              | 2  | 15 | 16  |          |          |
|              | 1  | 15 | 15  |          |          |
| 739/97/1     | 24 | 1  | 360 | 4621.521 | 41.12498 |
| 685/97/1     | 23 | 1  | 331 | 12153.6  | 6.312821 |
| 685/97/2     | 22 | 1  | 330 | 10547.02 | 13.37768 |
| 685/97/3     | 21 | 1  | 301 |          |          |
| 482/97/1     | 20 | 1  | 300 | 7492.463 | 8.210602 |
| 482/97/2     | 19 | 1  | 271 | 9480.129 | 18.3011  |
| 482/97/3     | 18 | 1  | 270 | 10790.09 | 9.405538 |
| 420/97/1     | 17 | 1  | 241 | 15941    | 20.4083  |
| 427/97/1     | 16 | 1  | 240 | 12545.86 | 36.569   |
| 414/97/1     | 15 | 1  | 211 | 11644.34 | 46.45125 |
| 414/97/2     | 14 | 1  | 210 | 13079.94 | 20.01447 |
| 414/97/3     | 13 | 1  | 181 | 14588.67 | 42.19728 |
| 394/97a/1    | 12 | 1  | 180 | 10649.98 | 68.23325 |
| 394/97a/2    | 11 | 1  | 151 | 7374.047 | 36.3407  |
| 394/97a/3    | 10 | 1  | 150 | 13599.75 | 57.34906 |
| 264/97/1     | 9  | 1  | 121 | 16701    | 46.62889 |
| 264/97/2     | 8  | 1  | 120 | 10781.5  | 29.71622 |
| 264/97/3     | 7  | 1  | 91  | 14963.58 | 29.33167 |
| 1047/96/1    | 6  | 1  | 90  | 5129.171 | 42.94276 |
| 1047/96/2    | 5  | 1  | 61  | 9461.072 | 53.46825 |
| 1047/96/3    | 4  | 1  | 60  | 4822.58  | 46.91805 |
| 671/96/1     | 3  | 1  | 31  | 16988.93 | 47.94674 |
| 671/96/2     | 2  | 1  | 30  | 13835.39 | 44.55159 |
| 671/96/3     | 1  | 1  | 1   | 12494.34 | 51.85194 |
| 283/02 I/1   | 24 | 2  | 359 | 10582.44 | 21.60031 |
| 283/02 I/2   | 23 | 2  | 332 | 7439.133 | 12.89545 |
| 268/02/1     | 22 | 2  | 329 | 10989.28 | 41.15147 |
| 268/02/2     | 21 | 2  | 302 |          |          |
| 268/02c/1    | 20 | 2  | 299 | 16580.57 | 38.72827 |
| 268/02c/2    | 19 | 2  | 272 |          |          |
| 267/02a/1    | 18 | 2  | 269 |          |          |
| 267/02a/2    | 17 | 2  | 242 | 11017.24 | 39.5497  |
| 267/02a/3    | 16 | 2  | 239 | 11671.16 | 38.17566 |
| 195/02 IV/   | 15 | 2  | 212 | 13322.55 | 55.58985 |
| 195/02 IV/.  | 14 | 2  | 209 | 7146.475 | 46.93936 |
| 195/02 IV/.  | 13 | 2  | 182 | 9564.104 | 47.68232 |
| 176/02c/1    | 12 | 2  | 179 |          |          |
| 176/02c/2    | 11 | 2  | 152 | 14731.23 | 32.27485 |
| 176/02c/3    | 10 | 2  | 149 | 14523.2  | 13.43366 |
| 121/02 III/: | 9  | 2  | 122 | 7312.864 | 46.56369 |
| 121/02 III/: | 8  | 2  | 119 |          |          |
| 121/02 IV/   | 7  | 2  | 92  | 7511.458 | 41.24469 |
| 102/02/1     | 6  | 2  | 89  | 13577.61 | 54.16438 |
| 102/02/2     | 5  | 2  | 62  | 12460.19 | 45.72094 |
| 102/02/3     | 4  | 2  | 59  | 14388.49 | 1.246646 |

|              |    |   |     |          |          |
|--------------|----|---|-----|----------|----------|
| 55/02a/1     | 3  | 2 | 32  | 12413.14 | 22.69273 |
| 55/02a/2     | 2  | 2 | 29  | 9977.379 | 42.70971 |
| 55/02a/3     | 1  | 2 | 2   | 11405.76 | 53.93777 |
| 9/020/1      | 24 | 3 | 358 | 11536.56 | 63.58467 |
| 9/020/2      | 23 | 3 | 333 | 13491.28 | 52.3703  |
| 9/020/3      | 22 | 3 | 328 | 12391.56 | 52.66499 |
| 729/01a/1    | 21 | 3 | 303 | 6204.463 | 47.59594 |
| 729/01 IV/   | 20 | 3 | 298 |          |          |
| 650/01 II/1  | 19 | 3 | 273 | 14452.6  | 65.23829 |
| 650/01 II/2  | 18 | 3 | 268 | 13365.13 | 37.7132  |
| 650/01 II/3  | 17 | 3 | 243 | 13326.59 | 56.45028 |
| 546/01a/1    | 16 | 3 | 238 | 9574.641 | 2.12398  |
| 546/01 Ic/:  | 15 | 3 | 213 | 9460.44  | 32.43354 |
| 546/01 Ic/:  | 14 | 3 | 208 | 9222.771 | 4.968205 |
| 510/01 I/1   | 13 | 3 | 183 | 5263.78  | 48.81073 |
| 510/01 III/: | 12 | 3 | 178 | 4422.354 | 1.216947 |
| 510/01/ V/   | 11 | 3 | 153 | 4761.854 | 55.02138 |
| 572/04/1     | 10 | 3 | 148 | 10475.18 | 47.69461 |
| 572/04/2     | 9  | 3 | 123 | 6823.659 | 47.21441 |
| 574/04/1     | 8  | 3 | 118 | 8954.656 | 42.9684  |
| 410/01/1     | 7  | 3 | 93  | 11175.98 | 45.19587 |
| 410/01/2     | 6  | 3 | 88  | 12038.94 | 55.29908 |
| 410/01/3     | 5  | 3 | 63  | 10498.83 | 22.06947 |
| 320/01/1     | 4  | 3 | 58  | 10652.16 | 22.94674 |
| 320/01/2     | 3  | 3 | 33  | 11231.88 | 45.78426 |
| 320/01/3     | 2  | 3 | 28  | 10936.07 | 54.00415 |
| 455/00/1     | 1  | 3 | 3   | 3598.644 | 2.483788 |
| 455/00/2     | 24 | 4 | 357 | 2849.895 | 3.202496 |
| 455/00/3     | 23 | 4 | 334 | 4164.87  | 1.77689  |
| 306/01/1     | 22 | 4 | 327 | 12358.07 | 26.55279 |
| 306/01/2     | 21 | 4 | 304 |          |          |
| 306/01/3     | 20 | 4 | 297 |          |          |
| 297/01/1     | 19 | 4 | 274 | 8694.946 | 6.920422 |
| 297/01/2     | 18 | 4 | 267 | 8136.697 | 38.7913  |
| 297/01/3     | 17 | 4 | 244 | 10117.88 | 10.25618 |
| 262/01a/1    | 16 | 4 | 237 | 13277.4  | 53.85405 |
| 262/01a/2    | 15 | 4 | 214 | 13184.31 | 54.20037 |
| 262/01a/3    | 14 | 4 | 207 | 10685.04 | 43.7022  |
| 201/01 II/1  | 13 | 4 | 184 | 5917.034 | 41.41023 |
| 201/01/ IV,  | 12 | 4 | 177 | 4482.826 | 48.03779 |
| 153/01 a/1   | 11 | 4 | 154 | 14970.14 | 5.819264 |
| 26/01 H/1    | 10 | 4 | 147 |          |          |
| 26/01 H/2    | 9  | 4 | 124 | 6551.249 | 44.7993  |
| 26/01 H/3    | 8  | 4 | 117 |          |          |
| 794/00/1     | 7  | 4 | 94  |          |          |
| 794/00/2     | 6  | 4 | 87  | 10640.49 | 15.88216 |
| 796/00c/1    | 5  | 4 | 64  | 7525.882 | 8.957751 |

|              |    |   |     |          |          |
|--------------|----|---|-----|----------|----------|
| 777/00 Ia/:  | 4  | 4 | 57  | 11030.26 | 35.90333 |
| 777/00 Ia/:  | 3  | 4 | 34  | 11156.75 | 11.10905 |
| 777/00 Ia/:  | 2  | 4 | 27  | 11566.6  | 20.29042 |
| 765/00/1     | 1  | 4 | 4   | 15336.22 | 18.70395 |
| 765/00/2     | 24 | 5 | 356 | 9824.751 | 56.78059 |
| 765/00/3     | 23 | 5 | 335 |          |          |
| 749/00/1     | 22 | 5 | 326 | 12599.34 | 11.50674 |
| 749/00/2     | 21 | 5 | 305 | 11241.14 | 55.31683 |
| 749/00/3     | 20 | 5 | 296 | 12001.78 | 61.55397 |
| 534/98/1     | 19 | 5 | 275 |          |          |
| 534/98/2     | 18 | 5 | 266 | 14705.49 | 56.05979 |
| 534/98/3     | 17 | 5 | 245 |          |          |
| 142/03b/1    | 16 | 5 | 236 | 10043.96 | 58.11801 |
| 524/98/1     | 15 | 5 | 215 | 14377.96 | 28.26937 |
| 524/98 III/: | 14 | 5 | 206 | 6253.032 | 1.511977 |
| 524/98 III/: | 13 | 5 | 185 | 8720.869 | 2.354092 |
| 524/98 III/: | 12 | 5 | 176 | 3724.37  | 55.96391 |
| 371/98a/1    | 11 | 5 | 155 |          |          |
| 371/98a/2    | 10 | 5 | 146 | 13042.4  | 54.4309  |
| 371/98a/3    | 9  | 5 | 125 | 13189.51 | 1.924614 |
| 346/98b/1    | 8  | 5 | 116 | 6231.931 | 1.164258 |
| 346/98b/3    | 7  | 5 | 95  | 14579.41 | 48.30969 |
| 346/98b/2    | 6  | 5 | 86  | 8040.191 | 6.447269 |
| 290/98 II/1  | 5  | 5 | 65  | 6208.694 | 34.39016 |
| 290/98 II/2  | 4  | 5 | 56  | 8970.844 | 39.66877 |
| 290/98 II/3  | 3  | 5 | 35  | 4111.823 | 43.15337 |
| 768/98c/1    | 2  | 5 | 26  | 9538.069 | 34.84661 |
| 768/98c/2    | 1  | 5 | 5   | 16282.65 | 7.824799 |
| 768/98c/3    | 24 | 6 | 355 | 8594.119 | 50.16457 |
| 185/98/1     | 23 | 6 | 336 | 9198.792 | 52.30371 |
| 185/98/2     | 22 | 6 | 325 | 12848.19 | 28.77285 |
| 185/98/3     | 21 | 6 | 306 | 11122.49 | 50.87014 |
| 21/98/1      | 20 | 6 | 295 |          |          |
| 25/98a/1     | 19 | 6 | 276 | 14373.65 | 44.07012 |
| 1092/97b/:   | 18 | 6 | 265 | 10254.13 | 51.37662 |
| 1092/97b/:   | 17 | 6 | 246 | 13237.54 | 52.56827 |
| 1092/97b/:   | 16 | 6 | 235 | 15341.67 | 63.78242 |
| 1076/97b/:   | 15 | 6 | 216 | 14469.49 | 27.28226 |
| 1076/97b/:   | 14 | 6 | 205 | 12206.82 | 40.11201 |
| 1076/97b/:   | 13 | 6 | 186 | 12750.2  | 42.42942 |
| 513/98a/1    | 12 | 6 | 175 |          |          |
| 513/98a/2    | 11 | 6 | 156 | 13817.73 | 60.21572 |
| 513/98a/3    | 10 | 6 | 145 | 10040.31 | 49.9167  |
| 923/97a/1    | 9  | 6 | 126 | 13202.34 | 39.36123 |
| 923/97a/2    | 8  | 6 | 115 | 14731.57 | 46.02834 |
| 923/97a/3    | 7  | 6 | 96  | 9075.118 | 3.872359 |
| 737/00/1     | 6  | 6 | 85  | 10864.91 | 22.41985 |

|             |    |   |     |          |          |
|-------------|----|---|-----|----------|----------|
| 737/00/2    | 5  | 6 | 66  | 12894.01 | 9.092129 |
| 737/00/3    | 4  | 6 | 55  | 10676.6  | 44.46703 |
| 710/00/1    | 3  | 6 | 36  |          |          |
| 710/00/2    | 2  | 6 | 25  |          |          |
| 710/00/3    | 1  | 6 | 6   | 15179.01 | 49.85696 |
|             | 24 | 7 | 354 |          |          |
|             | 23 | 7 | 337 |          |          |
|             | 22 | 7 | 324 |          |          |
|             | 21 | 7 | 307 |          |          |
|             | 20 | 7 | 294 |          |          |
|             | 19 | 7 | 277 |          |          |
|             | 18 | 7 | 264 | 12124.7  | 53.65147 |
|             | 17 | 7 | 247 | 13843.64 | 19.15215 |
|             | 16 | 7 | 234 |          |          |
|             | 15 | 7 | 217 |          |          |
|             | 14 | 7 | 204 |          |          |
|             | 13 | 7 | 187 | 16108.45 | 31.24609 |
|             | 12 | 7 | 174 | 14955.55 | 44.13189 |
|             | 11 | 7 | 157 | 7943.993 | 37.86106 |
|             | 10 | 7 | 144 |          |          |
|             | 9  | 7 | 127 |          |          |
|             | 8  | 7 | 114 |          |          |
|             | 7  | 7 | 97  |          |          |
|             | 6  | 7 | 84  |          |          |
|             | 5  | 7 | 67  |          |          |
|             | 4  | 7 | 54  |          |          |
|             | 3  | 7 | 37  |          |          |
|             | 2  | 7 | 24  |          |          |
|             | 1  | 7 | 7   |          |          |
| 518/00b/1   | 24 | 8 | 353 | 8806.783 | 31.07782 |
| 518/00b/2   | 23 | 8 | 338 | 10587.52 | 45.96112 |
| 518/00b/3   | 22 | 8 | 323 | 6389.458 | 6.464739 |
| 439/00a/1   | 21 | 8 | 308 |          |          |
| 439/00b/1   | 20 | 8 | 293 |          |          |
| 448/00/1    | 19 | 8 | 278 | 12499.85 | 49.49135 |
| 448/00/2    | 18 | 8 | 263 | 11852.7  | 49.76681 |
| 448/00/3    | 17 | 8 | 248 | 3617.81  | 4.356482 |
| 415/00 I/1  | 16 | 8 | 233 | 11729.87 | 26.45873 |
| 415/00 I/2  | 15 | 8 | 218 | 4681.728 | 39.44984 |
| 415/00 I/3  | 14 | 8 | 203 | 15287.59 | 3.377194 |
| 401/00a/1   | 13 | 8 | 188 |          |          |
| 401/00a/2   | 12 | 8 | 173 | 13627.49 | 1.141967 |
| 401/00a/3   | 11 | 8 | 158 | 16120.86 | 42.49092 |
| 365/00 II/1 | 10 | 8 | 143 | 14069.09 | 24.18248 |
| 365/00 II/2 | 9  | 8 | 128 | 14330.2  | 54.31372 |
| 365/00 II/3 | 8  | 8 | 113 | 10375.96 | 39.07501 |
| 270/00/1    | 7  | 8 | 98  | 8035.134 | 33.33401 |

|            |    |    |     |          |          |
|------------|----|----|-----|----------|----------|
| 270/00/2   | 6  | 8  | 83  | 13926.71 | 16.30283 |
| 270/00/3   | 5  | 8  | 68  |          |          |
| 259/00/1   | 4  | 8  | 53  | 10425.51 | 7.612576 |
| 259/00/2   | 3  | 8  | 38  | 10527.21 | 17.00581 |
| 259/00/3   | 2  | 8  | 23  | 5644.54  | 40.2081  |
| 253/00a/1  | 1  | 8  | 8   | 8811.678 | 36.98751 |
| 253/00a/2  | 24 | 9  | 352 | 6854.27  | 41.8808  |
| 253/00a/3  | 23 | 9  | 339 |          |          |
| 197/00a/1  | 22 | 9  | 322 |          |          |
| 197/00a/2  | 21 | 9  | 309 | 4341.229 | 6.403525 |
| 197/00a/3  | 20 | 9  | 292 | 10975.76 | 45.08379 |
| 150/00/1   | 19 | 9  | 279 | 11972.71 | 9.158934 |
| 150/00/2   | 18 | 9  | 262 |          |          |
| 122/00/1   | 17 | 9  | 249 | 14202.04 | 48.2222  |
| 123/00/1   | 16 | 9  | 232 | 12784.68 | 48.05687 |
| 129/00/b/: | 15 | 9  | 219 |          |          |
| 900/99/1   | 14 | 9  | 202 | 9286.135 | 52.14543 |
| 900/99/2   | 13 | 9  | 189 | 12951.91 | 52.87553 |
| 900/99/3   | 12 | 9  | 172 | 12512.01 | 24.73383 |
| 775/99/1   | 11 | 9  | 159 | 13194.07 | 33.45071 |
| 775/99/2   | 10 | 9  | 142 | 10707.47 | 58.51262 |
| 775/99/3   | 9  | 9  | 129 | 9602.966 | 53.66419 |
| 686/99/1   | 8  | 9  | 112 | 10608.42 | 50.16554 |
| 686/99/2   | 7  | 9  | 99  | 15010.61 | 53.8022  |
| 634/99a/1  | 6  | 9  | 82  | 16099.48 | 26.25042 |
| 634/99a/2  | 5  | 9  | 69  | 15412.5  | 52.71439 |
| 634/99a/3  | 4  | 9  | 52  | 8878.965 | 45.4821  |
| 630/99/1   | 3  | 9  | 39  |          |          |
| 630/99/2   | 2  | 9  | 22  |          |          |
| 630/99/3   | 1  | 9  | 9   | 10461.53 | 1.839641 |
| 516/99/1   | 24 | 10 | 351 | 2173.537 | 24.17745 |
| 516/99/2   | 23 | 10 | 340 | 2375.377 | 48.7435  |
| 516/99/3   | 22 | 10 | 321 | 2416.402 | 17.40594 |
| 405/99a/1  | 21 | 10 | 310 | 11728.12 | 44.62328 |
| 405/99a/2  | 20 | 10 | 291 |          |          |
| 212/99a/1  | 19 | 10 | 280 | 17576.46 | 36.41205 |
| 212/99a/2  | 18 | 10 | 261 | 8962.001 | 39.51315 |
| 158/99/1   | 17 | 10 | 250 | 11324.24 | 41.2681  |
| 158/99/2   | 16 | 10 | 231 | 13444.39 | 56.32009 |
| 162/99/1   | 15 | 10 | 220 | 13713.28 | 56.46041 |
| 936/98a/1  | 14 | 10 | 201 | 12463.78 | 23.937   |
| 936/98a/2  | 13 | 10 | 190 | 13667.82 | 56.05853 |
| 936/98a/3  | 12 | 10 | 171 |          |          |
| 554/98/1   | 11 | 10 | 160 |          |          |
| 910/98a/1  | 10 | 10 | 141 |          |          |
| 910/98a/2  | 9  | 10 | 130 | 12689.97 | 16.37606 |
| 910/98a/3  | 8  | 10 | 111 | 16008.88 | 7.764772 |

|              |    |    |     |          |          |
|--------------|----|----|-----|----------|----------|
| 888/98/1     | 7  | 10 | 100 |          |          |
| 888/98/2     | 6  | 10 | 81  | 14445.44 | 13.64833 |
| 888/98/3     | 5  | 10 | 70  | 11517.9  | 48.08496 |
| 856/98a/1    | 4  | 10 | 51  | 8377.497 | 50.96342 |
| 856/98a/2    | 3  | 10 | 40  | 8927.686 | 44.74794 |
| 856/98a/3    | 2  | 10 | 21  | 9083.954 | 30.34674 |
| 606/97 II/1  | 1  | 10 | 10  |          |          |
| 606/97 II/2  | 24 | 11 | 350 | 10142.43 | 16.38284 |
| 606/97 II/3  | 23 | 11 | 341 | 4239.295 | 21.28641 |
| 843/98b/1    | 22 | 11 | 320 | 6992.774 | 100      |
| 770/98/1     | 21 | 11 | 311 | 11342.55 | 19.51616 |
| 365/97a/1    | 20 | 11 | 290 |          |          |
| 365/97a/2    | 19 | 11 | 281 | 3409.271 | 16.24092 |
| 365/97a/3    | 18 | 11 | 260 | 4232.46  | 2.261013 |
| 660/98/1     | 17 | 11 | 251 | 4967.2   | 16.26027 |
| 660/98/2     | 16 | 11 | 230 |          |          |
| 660/98/3     | 15 | 11 | 221 |          |          |
| 603/98/1     | 14 | 11 | 200 | 12085.33 | 44.79595 |
| 603/98/2     | 13 | 11 | 191 | 12633.93 | 3.603952 |
| 602/98/1     | 12 | 11 | 170 | 12590.37 | 37.37191 |
| 602/98/2     | 11 | 11 | 161 | 10974.6  | 40.46058 |
| 602/98/3     | 10 | 11 | 140 | 9606.124 | 59.54355 |
| 591/98/1     | 9  | 11 | 131 | 13300.88 | 20.69614 |
| 591/98/2     | 8  | 11 | 110 | 14489.51 | 4.972328 |
| 591/98/3     | 7  | 11 | 101 | 10927.18 | 7.851213 |
| 561/98a/1    | 6  | 11 | 80  | 16257.46 | 43.93581 |
| 563/98Y/1    | 5  | 11 | 71  | 15215.13 | 12.48826 |
| 563/98Y/2    | 4  | 11 | 50  | 13731.31 | 7.006303 |
| 563/98 4/1   | 3  | 11 | 41  | 15914.16 | 41.78388 |
| 324/95/1     | 2  | 11 | 20  | 11004.84 | 47.48274 |
|              | 1  | 11 | 11  | 13418.55 | 39.48548 |
| 324/95all/:  | 24 | 12 | 349 | 8597.121 | 11.63657 |
| 324/95all/:  | 23 | 12 | 342 | 6608.654 | 17.20183 |
| 280/98/1     | 22 | 12 | 319 | 7579.046 | 33.61255 |
| 553/97/1     | 21 | 12 | 312 |          |          |
| 633/95/1     | 20 | 12 | 289 | 3112.572 | 20.18232 |
| 633/95/2     | 19 | 12 | 282 |          |          |
| 633/95/3     | 18 | 12 | 259 | 7757.839 | 47.26625 |
| 133/96/1     | 17 | 12 | 252 | 10877.74 | 12.5921  |
| 133/96/2     | 16 | 12 | 229 | 13456.79 | 30.23445 |
| 248/96/1     | 15 | 12 | 222 | 12114.07 | 43.78152 |
| 248/96/2     | 14 | 12 | 199 | 11041.45 | 36.4268  |
| 248/96/3     | 13 | 12 | 192 | 11248.64 | 48.03283 |
| 312/96 II/1  | 12 | 12 | 169 | 11975.5  | 53.13304 |
| 312/96 II/2  | 11 | 12 | 162 | 13296.07 | 23.85922 |
| 312/96 III/: | 10 | 12 | 139 | 12067.4  | 42.19917 |
| 491/96/1     | 9  | 12 | 132 | 9273.287 | 12.81949 |

|             |    |    |     |          |          |
|-------------|----|----|-----|----------|----------|
| 491/96/2    | 8  | 12 | 109 | 12114.09 | 17.13642 |
| 491/96/3    | 7  | 12 | 102 | 8564.24  | 3.649863 |
| 630/97/1    | 6  | 12 | 79  | 11749    | 45.58244 |
| 630/97/2    | 5  | 12 | 72  | 5853.966 | 47.35479 |
| 630/97/3    | 4  | 12 | 49  | 6866.149 | 1.054618 |
| 733/98a/1   | 3  | 12 | 42  |          |          |
| 733/98a/2   | 2  | 12 | 19  | 16905.08 | 15.32717 |
| 733/98a/3   | 1  | 12 | 12  |          |          |
| 165/91/1    | 24 | 13 | 348 |          |          |
| 739/95 lb/: | 23 | 13 | 343 |          |          |
| 739/95 lb/: | 22 | 13 | 318 | 7177.303 | 61.23833 |
| 739/95 lb/: | 21 | 13 | 313 | 6527.985 | 43.7827  |
| 15/96/1     | 20 | 13 | 288 |          |          |
| 15/96/2     | 19 | 13 | 283 | 9372.584 | 4.014563 |
| 15/96/3     | 18 | 13 | 258 |          |          |
| 114/96(II)/ | 17 | 13 | 253 |          |          |
| 114/96(II)/ | 16 | 13 | 228 |          |          |
| 114/96(II)/ | 15 | 13 | 223 | 2981.458 | 43.95726 |
| 443/95/1    | 14 | 13 | 198 | 3504.895 | 17.97888 |
| 443/95/2    | 13 | 13 | 193 | 3783.332 | 46.80589 |
| 443/95/3    | 12 | 13 | 168 | 7634.484 | 43.13464 |
| 741/95/1    | 11 | 13 | 163 | 6855.77  | 39.09597 |
| 741/95/2    | 10 | 13 | 138 | 6372.191 | 50.30838 |
| 741/95/3    | 9  | 13 | 133 | 7898.557 | 52.97623 |
| 659/95/1    | 8  | 13 | 108 | 5452.806 | 46.03365 |
| 659/95/2    | 7  | 13 | 103 | 13042    | 8.051697 |
| 659/95/3    | 6  | 13 | 78  | 17066.47 | 15.05765 |
| 564/95/1    | 5  | 13 | 73  | 12232.41 | 23.36923 |
| 709/95/1    | 4  | 13 | 48  | 10967.31 | 23.38824 |
| 709/95/2    | 3  | 13 | 43  | 11430.11 | 45.43556 |
| 709/95/3    | 2  | 13 | 18  |          |          |
| 481/00/1    | 1  | 13 | 13  | 12560.36 | 8.203753 |
| 481/00/2    | 24 | 14 | 347 | 7118.785 | 8.086078 |
| 481/00/3    | 23 | 14 | 344 |          |          |
| 415/97/1    | 22 | 14 | 317 | 8439.64  | 33.21088 |
| 415/97/2    | 21 | 14 | 314 | 5765.475 | 46.34581 |
| 415/97/3    | 20 | 14 | 287 | 7367.814 | 40.43514 |
| 329/02/1    | 19 | 14 | 284 |          |          |
| 19/02a/1    | 18 | 14 | 257 |          |          |
| 19/02a/2    | 17 | 14 | 254 |          |          |
| 19/02a/3    | 16 | 14 | 227 | 11126.16 | 7.640038 |
| 507/01/1    | 15 | 14 | 224 | 3720.078 | 44.55864 |
| 507/01/2    | 14 | 14 | 197 | 3342.876 | 9.383176 |
| 507/01/3    | 13 | 14 | 194 | 6701.952 | 43.66824 |
| 455/98/1    | 12 | 14 | 167 |          |          |
| 455/98/2    | 11 | 14 | 164 | 5491.63  | 3.688087 |
| 2/97/1      | 10 | 14 | 137 |          |          |



|              |    |    |     |          |          |
|--------------|----|----|-----|----------|----------|
| 2/97/2       | 9  | 14 | 134 |          |          |
| 2/97/3       | 8  | 14 | 107 |          |          |
| 427/03/1     | 7  | 14 | 104 |          |          |
| 607/03/1     | 6  | 14 | 77  |          |          |
| 607/03/2     | 5  | 14 | 74  |          |          |
| 607/03/3     | 4  | 14 | 47  | 9872.435 | 100      |
| 34/97/1      | 3  | 14 | 44  | 9831.829 | 100      |
| 34/97/2      | 2  | 14 | 17  |          |          |
| 34/97/3      | 1  | 14 | 14  |          |          |
| 5/93/1       | 24 | 15 | 346 |          |          |
| 5/93/2       | 23 | 15 | 345 |          |          |
| 5/93/3       | 22 | 15 | 316 | 4509.885 | 14.98854 |
| 849/96/1     | 21 | 15 | 315 | 2619.459 | 44.75885 |
| 849/96/2     | 20 | 15 | 286 |          |          |
| 849/96/3     | 19 | 15 | 285 | 2626.191 | 17.48679 |
| 722/03 IIa/  | 18 | 15 | 256 | 6163.754 | 3.216262 |
| 722/03 IIa/  | 17 | 15 | 255 | 5446.959 | 10.64023 |
| 722/03 IIa/  | 16 | 15 | 226 |          |          |
| 344/97 III/: | 15 | 15 | 225 | 3270.814 | 1.331619 |
| 344/97 IV/   | 14 | 15 | 196 |          |          |
| 344/97 IV/.  | 13 | 15 | 195 |          |          |
| 334/94/1     | 12 | 15 | 166 |          |          |
| 334/94/2     | 11 | 15 | 165 |          |          |
| 334/94/3     | 10 | 15 | 136 |          |          |
|              | 9  | 15 | 135 |          |          |
|              | 8  | 15 | 106 |          |          |
|              | 7  | 15 | 105 |          |          |
|              | 6  | 15 | 76  |          |          |
| 32173/06 I   | 5  | 15 | 75  |          |          |
| 33114/06 I   | 4  | 15 | 46  |          |          |
| 32823/06 I   | 3  | 15 | 45  |          |          |
| 32414/06 I   | 2  | 15 | 16  |          |          |
| NCH 524C     | 1  | 15 | 15  |          |          |
| 51/99/1      | 1  | 15 |     |          |          |
| 584/99c/3    | 1  | 14 |     |          |          |
| 598/03/3     | 1  | 13 |     |          |          |
| 667/99/3     | 1  | 12 |     |          |          |
| 655/98/1     | 1  | 11 |     | 6084.174 | 57.06025 |
| 78/02 IIb/1  | 1  | 10 |     | 10485.94 | 43.68557 |
| 549/02/3     | 1  | 9  |     | 9028.458 | 4.490231 |
| 449/03b/1    | 1  | 8  |     | 4922.499 | 16.30646 |
| 408/03/1     | 1  | 7  |     | 9927.22  | 23.8827  |
| 793/03a/1    | 1  | 6  |     |          |          |
| 373/04 II/2  | 1  | 5  |     | 12755.36 | 11.8764  |
| 619/04 I/2   | 1  | 4  |     | 4474.021 | 15.38916 |
| 635/04f/1    | 1  | 3  |     |          |          |
| 538/02 IIa/  | 1  | 2  |     | 3579.314 | 5.066385 |

|             |   |    |          |          |
|-------------|---|----|----------|----------|
| 32173/06 I  | 1 | 1  |          |          |
| 54/99/1     | 2 | 15 |          |          |
| 727/96/1    | 2 | 14 |          |          |
| 270/03b/1   | 2 | 13 |          |          |
| 965/95/1    | 2 | 12 |          |          |
| 833/95a/1   | 2 | 11 |          |          |
| 78/02 IIb/2 | 2 | 10 | 12650.97 | 12.55206 |
| 575/02/1    | 2 | 9  | 11346.21 | 2.492942 |
| 218/03a/1   | 2 | 8  |          |          |
| 408/03/2    | 2 | 7  | 5790.077 | 29.47591 |
| 793/03a/2   | 2 | 6  | 5789.137 | 11.78213 |
| 373/04 II/3 | 2 | 5  | 12661.12 | 31.30569 |
| 619/04 I/3  | 2 | 4  | 8686.021 | 51.26027 |
| 636/04/1    | 2 | 3  | 5738.516 | 3.827147 |
| 538/02 IIa/ | 2 | 2  | 4206.809 | 5.892498 |
| 33114/06 I  | 2 | 1  | 3741.033 | 2.90481  |
| 55/99/1     | 3 | 15 |          |          |
| 461/00b/1   | 3 | 14 |          |          |
| 270/03b/2   | 3 | 13 |          |          |
| 965/95/2    | 3 | 12 |          |          |
| 833/95a/2   | 3 | 11 |          |          |
| 923/95/1    | 3 | 10 |          |          |
| 575/02/2    | 3 | 9  | 11462.34 | 7.277085 |
| 218/03a/2   | 3 | 8  |          |          |
| 408/03/3    | 3 | 7  | 5028.731 | 37.28582 |
| 793/03a/3   | 3 | 6  | 11288.74 | 3.047434 |
| 400/03/1    | 3 | 5  | 11393.95 | 45.058   |
| 688/04 I/1  | 3 | 4  | 15461.35 | 7.62732  |
| 679/04 I/1  | 3 | 3  | 6048.741 | 11.81686 |
| 538/02 IIa/ | 3 | 2  | 4150.05  | 13.46881 |
| 32823/06 I  | 3 | 1  | 4119.724 | 1.246995 |
| 44/91/1     | 4 | 15 |          |          |
| 461/00b/2   | 4 | 14 | 5260.236 | 39.87743 |
| 270/03b/3   | 4 | 13 | 8456.306 | 30.72227 |
| 565/98/1    | 4 | 12 | 9043.569 | 15.32857 |
| 833/95a/3   | 4 | 11 | 14257.08 | 28.35302 |
| 923/95/2    | 4 | 10 |          |          |
| 575/02/3    | 4 | 9  |          |          |
| 218/03a/3   | 4 | 8  | 11622.78 | 20.95853 |
| 468/03/2    | 4 | 7  | 12771.85 | 36.75928 |
| 101/04/1    | 4 | 6  | 14956.38 | 49.82495 |
| 400/03/2    | 4 | 5  |          |          |
| 688/04 I/2  | 4 | 4  | 14064.5  | 60.04298 |
| 679/04 I/2  | 4 | 3  | 4342.54  | 50.95092 |
| 279/92/1    | 4 | 2  | 8240.434 | 61.77584 |
| 32414/06K   | 4 | 1  |          |          |
| 44/91/2     | 5 | 15 |          |          |

|             |   |    |          |          |
|-------------|---|----|----------|----------|
| 461/00b/3   | 5 | 14 |          |          |
| 208/04/1    | 5 | 13 | 11838.38 | 60.0891  |
| 565/98/2    | 5 | 12 | 9893.147 | 7.64444  |
| 413/96a/1   | 5 | 11 | 6757.272 | 61.86948 |
| 923/95/3    | 5 | 10 |          |          |
| 129/03/1    | 5 | 9  |          |          |
| 251/03/1    | 5 | 8  |          |          |
| 468/03/1    | 5 | 7  | 16277.82 | 46.57179 |
| 101/04/2    | 5 | 6  | 12409.3  | 6.454956 |
| 400/03/3    | 5 | 5  | 10909.42 | 49.80483 |
| 688/04 I/3  | 5 | 4  | 14343.77 | 56.5509  |
| 679/04 I/3  | 5 | 3  | 4816.751 | 37.168   |
| 279/92/2    | 5 | 2  |          |          |
| NCH524C     | 5 | 1  | 8335.254 | 7.03     |
| 829/92a/1   | 6 | 15 |          |          |
| 664/04a/1   | 6 | 14 |          |          |
| 535/03/1    | 6 | 13 | 7868.424 | 27.36038 |
| 134/98/1    | 6 | 12 |          |          |
| 390/01/1    | 6 | 11 |          |          |
| 117/96/1    | 6 | 10 | 10577.35 | 47.62732 |
| 129/03/2    | 6 | 9  |          |          |
| 251/03/2    | 6 | 8  | 12688.66 | 18.11047 |
| 468/03/3    | 6 | 7  | 14972.32 | 56.32589 |
| 101/04/3    | 6 | 6  | 15223.81 | 36.38326 |
| 738/00b/1   | 6 | 5  | 5320.194 | 20.80592 |
| 717/04 Ib/: | 6 | 4  | 14593.54 | 1.14581  |
| 361/01 I/1  | 6 | 3  | 6956.272 | 59.72635 |
| 279/92/3    | 6 | 2  | 7852.573 | 44.00093 |
|             | 6 | 1  |          |          |
| 829/92a/2   | 7 | 15 | 6866.31  | 31.35657 |
| 664/04b/1   | 7 | 14 |          |          |
| 538/03 I+II | 7 | 13 |          |          |
| 134/98/2    | 7 | 12 |          |          |
| 556/96/1    | 7 | 11 | 12697.65 | 8.187263 |
| 117/96/2    | 7 | 10 | 8168.165 | 37.88776 |
| 129/03/3    | 7 | 9  |          |          |
| 251/03/3    | 7 | 8  |          |          |
| 473/03/1    | 7 | 7  | 13431.45 | 55.33458 |
| 140/04a/1   | 7 | 6  | 12710.43 | 70.49377 |
| 738/00 II/1 | 7 | 5  | 8478.434 | 64.60078 |
| 717/04 Ib/: | 7 | 4  | 13104.77 | 7.032857 |
| 361/01 I/2  | 7 | 3  | 5932.137 | 53.75671 |
| 221/93/1    | 7 | 2  | 3180.296 | 60.42375 |
|             | 7 | 1  |          |          |
| 829/92a/3   | 8 | 15 | 7110.959 | 29.4773  |
| 768/03 Ib/: | 8 | 14 | 6984.544 | 58.19236 |
| 538 II/03/1 | 8 | 13 | 10007.2  | 31.87234 |

|              |    |    |          |          |
|--------------|----|----|----------|----------|
| 134/98/3     | 8  | 12 | 13826.21 | 53.547   |
| 556/96/2     | 8  | 11 | 13583.39 | 5.328712 |
| 117/96/3     | 8  | 10 | 5638.287 | 4.469616 |
| 601/02 I/1   | 8  | 9  |          |          |
| 262/03 III/: | 8  | 8  | 10452.09 | 42.64339 |
| 473/03/2     | 8  | 7  | 17915.73 | 42.0585  |
| 140/04a/2    | 8  | 6  | 11782.4  | 64.02847 |
| 738/00 II/2  | 8  | 5  | 7769.322 | 57.57792 |
| 717/04 Ib/:  | 8  | 4  | 11092.14 | 2.377502 |
| 361/01 I/3   | 8  | 3  | 3830.041 | 42.89014 |
| 221/93/2     | 8  | 2  | 2890.856 | 55.71962 |
|              | 8  | 1  |          |          |
| 838/95/1     | 9  | 15 | 4401.627 | 18.25463 |
| 768/03b IV   | 9  | 14 | 9349.814 | 43.94818 |
| 106/99/1     | 9  | 13 |          |          |
| 853/99 V/1   | 9  | 12 | 6520.687 | 49.95654 |
| 556/96/3     | 9  | 11 | 15622.6  | 34.5896  |
| 496/96/1     | 9  | 10 | 12823.84 | 24.81852 |
| 601/02 I/2   | 9  | 9  | 14419.48 | 22.52124 |
| 267/03b/1    | 9  | 8  |          |          |
| 473/03/3     | 9  | 7  | 13618.07 | 20.54443 |
| 140/04a/3    | 9  | 6  | 13175.49 | 66.25182 |
| 689/04/1     | 9  | 5  | 11240.02 | 100      |
| 730/04/1     | 9  | 4  | 11758.58 | 28.65147 |
| 939/97/1     | 9  | 3  | 2022.2   | 61.68213 |
| 221/93/3     | 9  | 2  | 3057.979 | 47.50999 |
|              | 9  | 1  |          |          |
| 838/95/2     | 10 | 15 | 3627.634 | 20.2937  |
| 768/03b IV   | 10 | 14 |          |          |
| 110/99/1     | 10 | 13 | 11539.06 | 38.43401 |
| 853/99 V/2   | 10 | 12 | 7147.831 | 56.24008 |
| 503/01/1     | 10 | 11 | 5368.962 | 70.93785 |
| 496/96/2     | 10 | 10 | 10729.95 | 17.30783 |
| 601/02 III/: | 10 | 9  | 12508.57 | 29.8281  |
| 264/03a/1    | 10 | 8  |          |          |
| 477/03/1     | 10 | 7  | 9136.684 | 11.85886 |
| 725/03/1     | 10 | 6  | 13096.22 | 19.2569  |
| 689/04/2     | 10 | 5  |          |          |
| 730/04/2     | 10 | 4  |          |          |
| 939/97/2     | 10 | 3  | 2157.335 | 55.50145 |
| 491/00d/1    | 10 | 2  | 16486.91 | 61.11038 |
|              | 10 | 1  |          |          |
|              | 11 | 15 |          |          |
|              | 11 | 14 |          |          |
|              | 11 | 13 |          |          |
|              | 11 | 12 |          |          |
|              | 11 | 11 |          |          |

|             |    |    |          |          |
|-------------|----|----|----------|----------|
|             | 11 | 10 |          |          |
| 637/02/1    | 11 | 9  | 15352.05 | 35.84267 |
| 281/03 Ia/: | 11 | 8  | 14283.2  | 10.56323 |
| 477/03/2    | 11 | 7  | 9908.124 | 21.35559 |
| 211/04All/  | 11 | 6  | 16627.43 | 54.77666 |
| 689/04/3    | 11 | 5  |          |          |
| 730/04/3    | 11 | 4  | 13557.21 | 17.94695 |
| 939/97/3    | 11 | 3  | 3384.322 | 45.14891 |
| 491/00d/2   | 11 | 2  | 17998.82 | 46.83796 |
|             | 11 | 1  |          |          |
| 838/95 Ia/: | 12 | 15 |          |          |
| 66/05/1     | 12 | 14 | 5980.126 | 20.02788 |
| 110/99/2    | 12 | 13 | 6929.162 | 5.90312  |
| 853/99 VI/  | 12 | 12 | 6437.555 | 43.42492 |
| 503/01/2    | 12 | 11 | 4992.179 | 30.87545 |
| 496/96/3    | 12 | 10 |          |          |
| 637/02/2    | 12 | 9  | 12127.07 | 17.04893 |
| 281/03 Ia/: | 12 | 8  | 19716.8  | 38.90884 |
| 477/03/3    | 12 | 7  |          |          |
| 211/04All/  | 12 | 6  | 17375.43 | 1.74775  |
| 8/4/2001    | 12 | 5  | 11439.67 | 1.863819 |
| 746/04/1    | 12 | 4  | 15137.39 | 10.74687 |
| 804/00 II/1 | 12 | 3  | 11693.49 | 78.41423 |
| 491/00d/3   | 12 | 2  | 15964.99 | 47.76023 |
|             | 12 | 1  |          |          |
| 838/95 Ia/: | 13 | 15 |          |          |
| 67/05/1     | 13 | 14 |          |          |
| 761/97/1    | 13 | 13 | 3569.649 | 3.751887 |
| 853/99 VI/: | 13 | 12 | 11122.29 | 40.31501 |
| 503/01/3    | 13 | 11 | 6332.139 | 10.84694 |
| 257/96/1    | 13 | 10 | 13089.39 | 23.52527 |
| 663/02b/1   | 13 | 9  | 13282.34 | 28.59927 |
| 281/03 Ib/: | 13 | 8  | 15043.81 | 45.98082 |
| 525/03 II/1 | 13 | 7  | 13334.06 | 33.60123 |
| 211/04All/  | 13 | 6  | 14014.28 | 14.71748 |
| 8/4/2002    | 13 | 5  | 10452.8  | 1.985549 |
| 746/04/2    | 13 | 4  | 16534.1  | 1.513515 |
| 804/00 II/2 | 13 | 3  | 9048.269 | 67.52914 |
| 124/93a/1   | 13 | 2  | 18599.84 | 6.515751 |
|             | 13 | 1  |          |          |
| 84/96/1     | 14 | 15 | 9739.379 | 20.62996 |
| 67/05/2     | 14 | 14 | 10154.75 | 21.76864 |
| 761/97/2    | 14 | 13 | 4216.863 | 9.796721 |
| 302/01a/1   | 14 | 12 | 10815.88 | 37.82137 |
| 341/01/1    | 14 | 11 |          |          |
| 613/96a/1   | 14 | 10 | 3532.226 | 49.54334 |
| 663/02b/2   | 14 | 9  | 15180.81 | 30.49446 |

|             |    |    |          |          |
|-------------|----|----|----------|----------|
| 284/03a/1   | 14 | 8  | 10689.59 | 58.75594 |
| 525/03 II/2 | 14 | 7  | 13098.8  | 36.46998 |
| 726/03/1    | 14 | 6  |          |          |
| 8/4/2003    | 14 | 5  | 12462.76 | 25.56993 |
| 746/04/3    | 14 | 4  |          |          |
| 804/00 II/3 | 14 | 3  | 13033.19 | 79.17207 |
| 124/93a/2   | 14 | 2  | 14498.89 | 17.32383 |
|             | 14 | 1  |          |          |
| 84/96/2     | 15 | 15 | 12307.15 | 10.36673 |
| 7/01a/1     | 15 | 14 |          |          |
| 761/97/3    | 15 | 13 | 4471.094 | 12.66408 |
| 302/01a/2   | 15 | 12 |          |          |
| 341/01/2    | 15 | 11 |          |          |
| 613/96a/2   | 15 | 10 | 2891.967 | 27.54039 |
| 663/02b/3   | 15 | 9  | 13698.43 | 14.98588 |
| 284/03a/2   | 15 | 8  | 9501.514 | 58.99667 |
| 525/03 II/3 | 15 | 7  | 12382.93 | 60.06981 |
| 202/04/1    | 15 | 6  |          |          |
| 440/04 II/1 | 15 | 5  | 13447.8  | 4.075777 |
| 151/91/1    | 15 | 4  |          |          |
| 667/95/1    | 15 | 3  | 5231.893 | 52.61139 |
| 124/93a/3   | 15 | 2  |          |          |
|             | 15 | 1  |          |          |
| 84/96/3     | 16 | 15 | 14580.66 | 1.935795 |
| 7/01d/1     | 16 | 14 | 10891.64 | 10.20097 |
| 294/99a/1   | 16 | 13 | 12126.05 | 61.11723 |
| 302/01a/3   | 16 | 12 | 10584.48 | 50.69425 |
| 366/03/1    | 16 | 11 |          |          |
| 613/96b/1   | 16 | 10 | 3021.693 | 54.59917 |
| 37/03a/1    | 16 | 9  | 10369.45 | 11.56858 |
| 284/03a/3   | 16 | 8  | 10607.36 | 59.01687 |
| 590/03/1    | 16 | 7  | 14781.38 | 12.00693 |
| 835/96b/1   | 16 | 6  | 4472.307 | 45.88691 |
| 440/04 II/2 | 16 | 5  | 8996.104 | 28.90779 |
| 151/91/2    | 16 | 4  | 7024.972 | 44.5954  |
| 667/95/2    | 16 | 3  | 10345.32 | 12.18974 |
| 193/99/1    | 16 | 2  | 1998.736 | 41.41198 |
|             | 16 | 1  |          |          |
| 318/03/1    | 17 | 15 | 14351.6  | 52.17381 |
| 7/01e/1     | 17 | 14 | 9505.653 | 40.1682  |
| 294/99a/2   | 17 | 13 | 11731.13 | 54.35816 |
| 302/01aII/: | 17 | 12 | 11362.18 | 45.2009  |
| 366/03/2    | 17 | 11 | 5726.546 | 58.14422 |
| 500/02a/1   | 17 | 10 | 15506.83 | 3.40291  |
| 37/03a/2    | 17 | 9  | 9271.913 | 37.78462 |
| 306/03b/1   | 17 | 8  |          |          |
| 130/04/1    | 17 | 7  | 14071.92 | 2.052773 |

|             |    |    |          |          |
|-------------|----|----|----------|----------|
| 835/96b/2   | 17 | 6  | 5191.03  | 53.73022 |
| 440/04 II/3 | 17 | 5  |          |          |
| 151/91/3    | 17 | 4  | 12406.13 | 8.393965 |
| 667/95/3    | 17 | 3  | 7846.531 | 35.17093 |
| 193/99 IV/  | 17 | 2  | 3633.018 | 1.42379  |
|             | 17 | 1  |          |          |
| 318/03/2    | 18 | 15 | 11487.28 | 41.85243 |
| 253/03/1    | 18 | 14 | 11543.67 | 25.52836 |
| 294/99a/3   | 18 | 13 | 12014.04 | 67.18555 |
| 465/99/1    | 18 | 12 | 8491.549 | 30.36407 |
| 540/95/1    | 18 | 11 |          |          |
| 500/02a/2   | 18 | 10 | 12790.28 | 2.638221 |
| 37/03a/3    | 18 | 9  | 11708.32 | 56.8105  |
| 307/03a/1   | 18 | 8  | 17683.47 | 37.86163 |
| 616/03 IIa/ | 18 | 7  | 8839.173 | 53.3642  |
| 835/96b/3   | 18 | 6  | 6997.573 | 41.33281 |
| 472/04/1    | 18 | 5  |          |          |
| 915/91/1    | 18 | 4  | 3169.712 | 72.65353 |
| 544/98/1    | 18 | 3  | 2735.637 | 8.611639 |
| 193/99 IV/. | 18 | 2  | 2429.006 | 46.5363  |
|             | 18 | 1  |          |          |
| 318/03/3    | 19 | 15 | 11502.76 | 9.281991 |
| 253/03/2    | 19 | 14 | 13294.11 | 5.572171 |
| 651/95b/1   | 19 | 13 | 11513.83 | 28.15379 |
| 465/99/2    | 19 | 12 | 19759.17 | 2.017134 |
| 541/95/1    | 19 | 11 | 3543.416 | 49.13972 |
| 500/02a/3   | 19 | 10 | 15672.24 | 3.157494 |
| 62/03/1     | 19 | 9  | 13046.51 | 34.95933 |
| 307/03a/2   | 19 | 8  | 18446.06 | 32.24753 |
| 616/03 IIa/ | 19 | 7  | 9503.47  | 57.56834 |
| 599/04/1    | 19 | 6  | 16361.93 | 36.54992 |
| 472/04/2    | 19 | 5  | 12518.86 | 15.56707 |
| 915/91/2    | 19 | 4  |          |          |
| 194/00/1    | 19 | 3  | 2041.624 | 18.35386 |
| 121/96B/1   | 19 | 2  | 7560.155 | 48.46378 |
|             | 19 | 1  |          |          |
| 103/04 II/1 | 20 | 15 |          |          |
| 253/03/3    | 20 | 14 | 12628.53 | 64.41595 |
| 651/95b/2   | 20 | 13 | 12277.55 | 5.743236 |
| 465/99/3    | 20 | 12 |          |          |
| 771/96a/1   | 20 | 11 | 8839.163 | 67.15704 |
| 430/96/1    | 20 | 10 | 9471.731 | 51.98178 |
| 62/03/2     | 20 | 9  | 13566.44 | 8.584037 |
| 309/03/1    | 20 | 8  | 5213.646 | 28.98514 |
| 616/03 IIa/ | 20 | 7  | 8492.078 | 48.28516 |
| 363/04 Ia/: | 20 | 6  |          |          |
| 472/04/3    | 20 | 5  | 15371.39 | 21.3616  |

|              |    |    |          |          |
|--------------|----|----|----------|----------|
| 557/04 III/: | 20 | 4  | 9618.341 | 51.308   |
| 198/00a/1    | 20 | 3  | 3102.716 | 3.181532 |
| 121/96B/2    | 20 | 2  | 6120.148 | 68.78661 |
|              | 20 | 1  |          |          |
| 103/04 II/2  | 21 | 15 | 10053.33 | 45.68852 |
| 238/04 I/1   | 21 | 14 | 8227.585 | 42.66967 |
| 651/95b/3    | 21 | 13 | 10299.81 | 45.77363 |
| 459/96/1     | 21 | 12 | 12797.92 | 25.91179 |
| 771/96a/2    | 21 | 11 | 6415.745 | 31.48542 |
| 430/96/2     | 21 | 10 | 11980.01 | 60.94603 |
| 62/03/3      | 21 | 9  | 12038.05 | 19.67506 |
| 360/03 IIa/  | 21 | 8  | 12497.81 | 23.20767 |
| 626/03/1     | 21 | 7  | 9088.267 | 56.17775 |
| 363/04 Ia/:  | 21 | 6  |          |          |
| 560/04 I/1   | 21 | 5  | 7102.357 | 40.05884 |
| 410/03 Ib/:  | 21 | 4  | 9374.521 | 42.00148 |
| 189/00 I/1   | 21 | 3  | 1852.293 | 1.031068 |
| 602/96a/1    | 21 | 2  | 5176.125 | 60.98614 |
|              | 21 | 1  |          |          |
| 103/04 II/3  | 22 | 15 | 8580.748 | 38.43505 |
| 238/04 I/2   | 22 | 14 | 8421.345 | 60.69761 |
| 997/96a/1    | 22 | 13 |          |          |
| 459/96/2     | 22 | 12 | 11453.58 | 36.16537 |
| 771/96a/3    | 22 | 11 | 5895.759 | 50.78684 |
| 430/96/3     | 22 | 10 | 7430.4   | 60.78447 |
| 107/03 Ia/:  | 22 | 9  | 7791.93  | 1.202482 |
| 360/03 IIa/  | 22 | 8  | 10391.3  | 14.06341 |
| 626/03/2     | 22 | 7  | 7966.114 | 13.96809 |
| 363/04 Ia/:  | 22 | 6  | 10843.64 | 36.05692 |
| 560/04 II/1  | 22 | 5  | 9808.586 | 15.05045 |
| 410/03 Ib/:  | 22 | 4  | 9290.633 | 31.64964 |
| 189/00 I/2   | 22 | 3  |          |          |
| 602/96a/2    | 22 | 2  | 4931.065 | 23.13108 |
|              | 22 | 1  |          |          |
| 405/02 I/1   | 23 | 15 |          |          |
| 238/04 I/3   | 23 | 14 | 7796.605 | 49.37885 |
| 997/96a/2    | 23 | 13 |          |          |
| 459/96/3     | 23 | 12 | 9361.698 | 48.47579 |
| 767/01 IVa   | 23 | 11 | 6506.046 | 46.36153 |
| 425/02 I/1   | 23 | 10 | 2468.743 | 44.08444 |
| 107/03Ia/2   | 23 | 9  | 7780.472 | 30.20447 |
| 360/03 IIa/  | 23 | 8  | 10518.65 | 51.55852 |
| 626/03/3     | 23 | 7  | 8457.634 | 56.1231  |
| 365/04hII/:  | 23 | 6  | 6446.452 | 8.964808 |
| 613/04 IVa   | 23 | 5  | 6234.307 | 6.196053 |
| 410/03 Ib/:  | 23 | 4  | 6711.908 | 28.50605 |
| 445/99 III/: | 23 | 3  |          |          |



|              |    |    |          |          |
|--------------|----|----|----------|----------|
| 602/96a/3    | 23 | 2  | 4540.442 | 1.174391 |
|              | 23 | 1  |          |          |
| 405/02 I/2   | 24 | 15 |          |          |
| 323/04/1     | 24 | 14 | 12436.49 | 45.99718 |
| 997/96a/3    | 24 | 13 | 5518.601 | 1.447129 |
| 115/98/1     | 24 | 12 | 12314.24 | 1.492271 |
| 767/01 IVa   | 24 | 11 | 6290.076 | 52.5369  |
| 425/02 II/1  | 24 | 10 | 2209.25  | 57.47827 |
| 107/03Ia/3   | 24 | 9  | 9449.254 | 4.116936 |
| 377/03 I/1   | 24 | 8  | 8274.22  | 17.44459 |
| 689/03 I/1   | 24 | 7  | 2773.755 | 42.14061 |
| 365/04hII/:  | 24 | 6  |          |          |
| 613/04 IVa   | 24 | 5  | 6789.918 | 61.05734 |
| 809/03/1     | 24 | 4  | 12282.74 | 3.659576 |
| 445/99 III/: | 24 | 3  | 8341.463 | 45.95218 |
| 100/96/1     | 24 | 2  | 5401.733 | 51.73524 |
|              | 24 | 1  |          |          |
| 584/99c/1    | 25 | 15 |          |          |
| 598/03a/1    | 25 | 14 |          |          |
| 667/99/1     | 25 | 13 | 4131.719 | 27.42488 |
| 115/98/2     | 25 | 12 | 10127.08 | 5.817168 |
| 767/01 IVa   | 25 | 11 | 7901.792 | 62.30622 |
| 549/02/1     | 25 | 10 |          |          |
| 182/03b/1    | 25 | 9  |          |          |
| 377/03 I/2   | 25 | 8  | 10131.92 | 48.28447 |
| 689/03 I/2   | 25 | 7  | 2527.206 | 9.880507 |
| 365/04hII/:  | 25 | 6  | 6657.22  | 1.377809 |
| 613/04 IVa   | 25 | 5  | 3240.583 | 50.32508 |
| 715/04/1     | 25 | 4  |          |          |
| 445/99 III/: | 25 | 3  | 5181.783 | 27.12098 |
| 100/96/2     | 25 | 2  | 7174.067 | 44.50651 |
|              | 25 | 1  |          |          |
| 584/99c/2    | 26 | 15 |          |          |
| 598/03a/2    | 26 | 14 | 5954.383 | 3.893881 |
| 667/99/2     | 26 | 13 | 2929.579 | 28.10292 |
| 115/98/3     | 26 | 12 | 11544.96 | 2.39553  |
| 78/02b/1     | 26 | 11 | 2558.671 | 2.28002  |
| 549/02/2     | 26 | 10 | 4793.215 | 4.102121 |
| 182/03c/1    | 26 | 9  | 7410.565 | 11.28683 |
| 377/03 I/3   | 26 | 8  | 8815.768 | 56.07481 |
| 689/03 I/3   | 26 | 7  | 3042.567 | 10.67601 |
| 373/04 II/1  | 26 | 6  | 9926.011 | 32.81977 |
| 619/04 I/1   | 26 | 5  | 6338.484 | 50.5691  |
| 635/04/1     | 26 | 4  |          |          |
|              | 26 | 3  |          |          |
| 100/96/3     | 26 | 2  | 4846.194 | 38.36476 |
|              | 26 | 1  |          |          |



**Supplementary Table 10. List of TFs Enriched in the Proneural Subtype**

| <b>Transcription Factor</b> | <b>Over-representation in proneural (p-value)</b> | <b>Overexpression in proneural (p-value)</b> | <b>Correlation with mir-34a in proneural</b> | <b>Correlation with mir-34a in proneural (p-value)</b> |
|-----------------------------|---------------------------------------------------|----------------------------------------------|----------------------------------------------|--------------------------------------------------------|
| MYC                         | 0.02570                                           | 0.01                                         | -0.33                                        | 0.00442                                                |
| PBX1                        | 5.40E-003                                         | 6.02E-007                                    | -0.42                                        | 0.00029                                                |
| SMAD4                       | 0.04133                                           | 2.30E-005                                    | -0.41                                        | 0.00037                                                |
